# Supplementary material
Source: Research Square preprint supplement (doi:10.21203/rs.3.rs-9441324/v1)
Supplement: Supplementary file 1 [file 6e66109bd61f6b68cc2b5896.pdf]

**Fig S1**

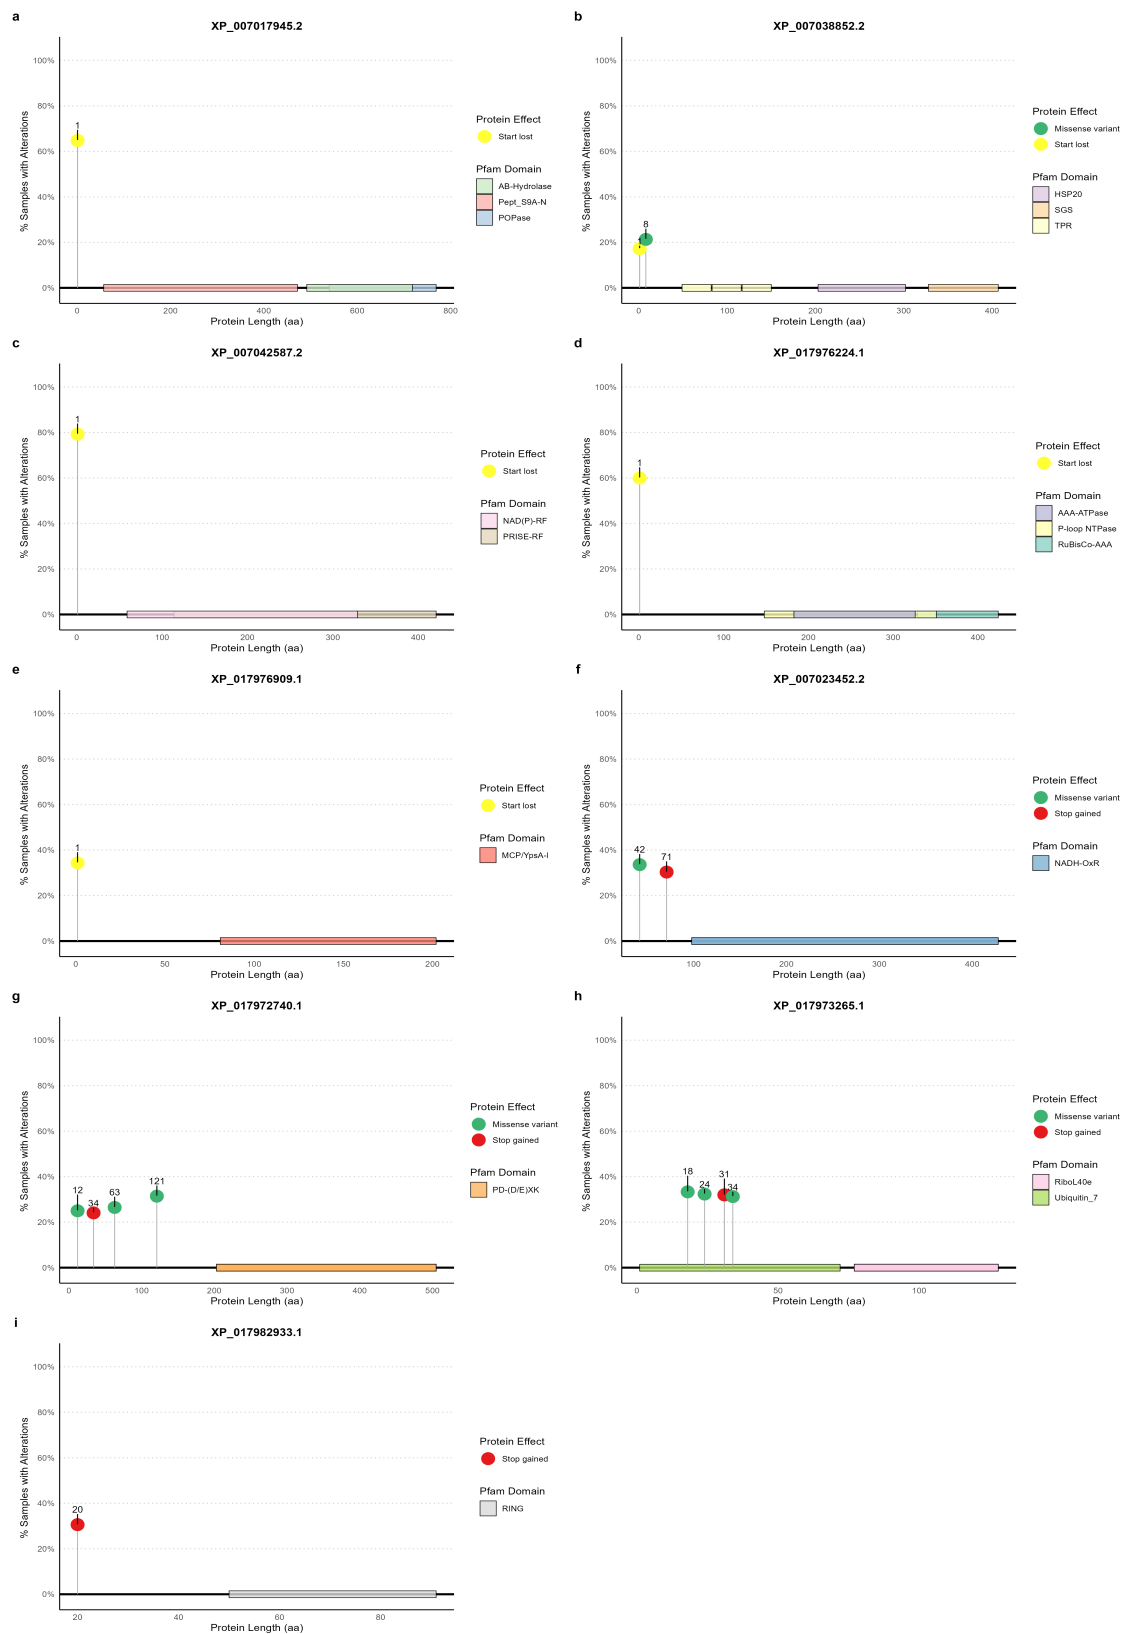

**Fig S1. Lollipop plots showing of high and moderate impact variants identified in genes located in neutral windows.** Each panel (a–i) represents an individual protein, with the total protein length displayed on the x-axis. Variant frequency across genotypes is shown on the y-axis. Circles along the protein sequence indicate the positions of affected amino acid residues and the type of mutation: missense variants (green), stop-gained (red), and start-lost (yellow). Colored boxes along the protein sequences represent predicted functional domains annotated using Pfam and InterProScan. Numbers above each lollipop indicate the amino acid position at where the variant occurs.
