# Supplementary material
Source: Research Square preprint supplement (doi:10.21203/rs.3.rs-9441324/v1)
Supplement: Supplementary file 1 [file 2088f67e1a770a520861d7c1.xlsx]

## Sheet: Supplementary Information
SNP-based genomic variation in candidate disease resistance genes of Theobroma cacao
Molecular Breeding
Gabriela Nicolle Ramos-Lizardo¹*, Konstantinos G. Alexiou², Jonathan Javier Mucherino-Muñoz³, María José Aranzana² & Ronan Xavier Corrêa¹˒⁴*
¹ Center for Biotechnology and Genetics, Universidade Estadual de Santa Cruz (UESC), Ilhéus 45662-900, Brazil
² Center for Research in Agricultural Genomics, UAB Campus, 08193 Cerdanyola del Vallès, Barcelona, Spain
³ Institute of Biodiversity and Sustainability (NUPEM), Federal University of Rio de Janeiro (UFRJ), Macaé, Rio de Janeiro, Brazil
⁴ Department of Biological Sciences, State University of Santa Cruz, Ilhéus, Bahia, 45662-900, Brazil
Corresponding authors:
Ronan Xavier Corrêa — ronanxc@uesc.br (ORCID: 0000-0002-4010-1565)
Gabriela Nicolle Ramos-Lizardo — nicolleramos94@gmail.com (ORCID: 0000-0003-2085-2836)
List of Supplementary Tables
Table S1. SRA accession numbers and metadata of 112 whole-genome resequencing (WGS) libraries of T. cacao used in this study
Table S2. List of Arabidopsis thaliana (TAIR10) disease resistance genes retrieved from Phytozome
Table S3. BLASTp results of A. thaliana proteins aligned against the T. cacao proteome
Table S4. DRAGO-based functional domain annotation of T. cacao proteins with functional annotation inferred from BLASTp against A. thaliana
Table S5. DRAGO-based functional domain annotation of previously uncharacterized T. cacao proteins identified by BLASTp against A. thaliana
Table S6. Annotation of functional domains and motifs based on InterProScan for T. cacao proteins identified as uncharacterized by BLASTp
Table S7. Annotation of conserved domains based on HMMER for T. cacao proteins identified as uncharacterized by BLASTp
Table S8. Ensembl VEP annotation of genetic variants detected in putative resistance genes of T. cacao
Table S9. Ensembl VEP annotation of coding-region SNPs in putative resistance genes of T. cacao
Table S10. Allele frequencies and number of chromosomes analyzed for SNPs identified in T. cacao

## Sheet: Table S1
	Table S1 SRA accession numbers and metadata of 112 Whole-genome resequencing (WGS) libraries of T. cacao used in this study
BioProject	Run	Assay	Filetype	Experiment	Instrument	Library Name	LibraryLayout	LibrarySource	Organism	Platform	Sample Name	SRA Study	BioSampleModel	country		stage		tissue		genotype	population	isolate	classification
PRJNA558793	SRR14022516	WGS	fastq,run.zq,sra	SRX10399159	IlluminaNovaSeq6000	G0101	PAIRED	GENOMIC	Theobromacacao	ILLUMINA	P000190	SRP217924	Plant	CostaRica	NorthAmerica	StageE	CostaRica:TheTropicalAgriculturalResearchandHigherEducationCenter(CATIE)	Leaves	LCTEEN261-S1	NA-33	Nanay	NA-33	Susceptible
PRJNA558793	SRR14022520	WGS	fastq,run.zq,sra	SRX10399155	IlluminaNovaSeq6000	G0098	PAIRED	GENOMIC	Theobromacacao	ILLUMINA	P000076	SRP217924	Plant	CostaRica	NorthAmerica	StageE	CostaRica:TheTropicalAgriculturalResearchandHigherEducationCenter(CATIE)	Leaves	SNA1003	NA-807	Nanay	NA-807	Susceptible
PRJNA558793	SRR14022521	WGS	fastq,run.zq,sra	SRX10399154	IlluminaNovaSeq6000	G0133	PAIRED	GENOMIC	Theobromacacao	ILLUMINA	P000087	SRP217924	Plant	CostaRica	NorthAmerica	StageE	CostaRica:TheTropicalAgriculturalResearchandHigherEducationCenter(CATIE)	Leaves		PA-107	Maranon	PA-107	Susceptible
PRJNA558793	SRR14022523	WGS	fastq,run.zq,sra	SRX10399152	IlluminaNovaSeq6000	G0131	PAIRED	GENOMIC	Theobromacacao	ILLUMINA	P000122	SRP217924	Plant	CostaRica	NorthAmerica	StageE	CostaRica:TheTropicalAgriculturalResearchandHigherEducationCenter(CATIE)	Leaves	ICS1	PA-71	Maranon	PA-71	Susceptible
PRJNA558793	SRR14022524	WGS	fastq,run.zq,sra	SRX10399151	IlluminaNovaSeq6000	G0130	PAIRED	GENOMIC	Theobromacacao	ILLUMINA	P000105	SRP217924	Plant	CostaRica	NorthAmerica	StageE	CostaRica:TheTropicalAgriculturalResearchandHigherEducationCenter(CATIE)	Leaves	TIWI71	PA-279	Maranon	PA-279	Resistant
PRJNA558793	SRR14022525	WGS	fastq,run.zq,sra	SRX10399150	IlluminaNovaSeq6000	G0129	PAIRED	GENOMIC	Theobromacacao	ILLUMINA	P000094	SRP217924	Plant	CostaRica	NorthAmerica	StageE	CostaRica:TheTropicalAgriculturalResearchandHigherEducationCenter(CATIE)	Leaves		PA-13	Maranon	PA-13	Resistant
PRJNA558793	SRR14022527	WGS	fastq,run.zq,sra	SRX10399148	IlluminaNovaSeq6000	G0127	PAIRED	GENOMIC	Theobromacacao	ILLUMINA	P000056	SRP217924	Plant	CostaRica	NorthAmerica	StageE	CostaRica:TheTropicalAgriculturalResearchandHigherEducationCenter(CATIE)	Leaves		NA-246	Maranon	NA-246	Resistant
PRJNA558793	SRR14022530	WGS	fastq,run.zq,sra	SRX10399145	IlluminaNovaSeq6000	G0124	PAIRED	GENOMIC	Theobromacacao	ILLUMINA	P000169	SRP217924	Plant	CostaRica	NorthAmerica	StageE	CostaRica:TheTropicalAgriculturalResearchandHigherEducationCenter(CATIE)	Leaves	MO96	KER-6	Guiana	KER-6	Susceptible
PRJNA558793	SRR14022531	WGS	fastq,run.zq,sra	SRX10399144	IlluminaNovaSeq6000	G0097	PAIRED	GENOMIC	Theobromacacao	ILLUMINA	P000072	SRP217924	Plant	CostaRica	NorthAmerica	StageE	CostaRica:TheTropicalAgriculturalResearchandHigherEducationCenter(CATIE)	Leaves	LCTEEN195	NA-710	Nanay	NA-710	Resistant
PRJNA558793	SRR14022532	WGS	fastq,run.zq,sra	SRX10399143	IlluminaNovaSeq6000	G0123	PAIRED	GENOMIC	Theobromacacao	ILLUMINA	P000139	SRP217924	Plant	CostaRica	NorthAmerica	StageE	CostaRica:TheTropicalAgriculturalResearchandHigherEducationCenter(CATIE)	Leaves		GU-195V	Guiana	GU-195V	Susceptible
PRJNA558793	SRR14022533	WGS	fastq,run.zq,sra	SRX10399142	IlluminaNovaSeq6000	G0122	PAIRED	GENOMIC	Theobromacacao	ILLUMINA	P000128	SRP217924	Plant	CostaRica	NorthAmerica	StageE	CostaRica:TheTropicalAgriculturalResearchandHigherEducationCenter(CATIE)	Leaves	VEN20	GU-123V	Guiana	GU-123V	Susceptible
PRJNA558793	SRR14022534	WGS	fastq,run.zq,sra	SRX10399141	IlluminaNovaSeq6000	G0121	PAIRED	GENOMIC	Theobromacacao	ILLUMINA	P000164	SRP217924	Plant	CostaRica	NorthAmerica	StageE	CostaRica:TheTropicalAgriculturalResearchandHigherEducationCenter(CATIE)	Leaves	SCA6	KER-1L	Guiana	KER-1L	Resistant
PRJNA558793	SRR14022535	WGS	fastq,run.zq,sra	SRX10399140	IlluminaNovaSeq6000	G0120	PAIRED	GENOMIC	Theobromacacao	ILLUMINA	P000176	SRP217924	Plant	CostaRica	NorthAmerica	StageE	CostaRica:TheTropicalAgriculturalResearchandHigherEducationCenter(CATIE)	Leaves		Pina	Guiana	Pina	Resistant
PRJNA558793	SRR14022536	WGS	fastq,run.zq,sra	SRX10399139	IlluminaNovaSeq6000	G0119	PAIRED	GENOMIC	Theobromacacao	ILLUMINA	P000172	SRP217924	Plant	CostaRica	NorthAmerica	StageE	CostaRica:TheTropicalAgriculturalResearchandHigherEducationCenter(CATIE)	Leaves	ZAMO11	OYA-2B	Guiana	OYA-2B	Resistant
PRJNA558793	SRR14022538	WGS	fastq,run.zq,sra	SRX10399137	IlluminaNovaSeq6000	G0117	PAIRED	GENOMIC	Theobromacacao	ILLUMINA	P000032	SRP217924	Plant	CostaRica	NorthAmerica	StageE	CostaRica:TheTropicalAgriculturalResearchandHigherEducationCenter(CATIE)	Leaves	MO121	IMC-57	Iquitos	IMC-57	Susceptible
PRJNA558793	SRR14022540	WGS	fastq,run.zq,sra	SRX10399135	IlluminaNovaSeq6000	G0115	PAIRED	GENOMIC	Theobromacacao	ILLUMINA	P000022	SRP217924	Plant	CostaRica	NorthAmerica	StageE	CostaRica:TheTropicalAgriculturalResearchandHigherEducationCenter(CATIE)	Leaves	KER6-2	IMC-31	Iquitos	IMC-31	Susceptible
PRJNA558793	SRR14022548	WGS	fastq,run.zq,sra	SRX10399127	IlluminaNovaSeq6000	G0108	PAIRED	GENOMIC	Theobromacacao	ILLUMINA	P000004	SRP217924	Plant	CostaRica	NorthAmerica	StageE	CostaRica:TheTropicalAgriculturalResearchandHigherEducationCenter(CATIE)	Leaves	LCTEEN193	Amaz-15/15	Iquitos	Amaz-15/15	Resistant
PRJNA558793	SRR14022550	WGS	fastq,run.zq,sra	SRX10399125	IlluminaNovaSeq6000	G0106	PAIRED	GENOMIC	Theobromacacao	ILLUMINA	P000007	SRP217924	Plant	CostaRica	NorthAmerica	StageE	CostaRica:TheTropicalAgriculturalResearchandHigherEducationCenter(CATIE)	Leaves		COCA-3370-5	Iquitos	COCA-3370-5	Resistant
PRJNA558793	SRR14022552	WGS	fastq,run.zq,sra	SRX10399123	IlluminaNovaSeq6000	G0104	PAIRED	GENOMIC	Theobromacacao	ILLUMINA	P000050	SRP217924	Plant	CostaRica	NorthAmerica	StageE	CostaRica:TheTropicalAgriculturalResearchandHigherEducationCenter(CATIE)	Leaves	LCTEEN414	SPEC-54/1	Iquitos	SPEC-54/1	Resistant
PRJNA558793	SRR14022553	WGS	fastq,run.zq,sra	SRX10399122	IlluminaNovaSeq6000	G0095	PAIRED	GENOMIC	Theobromacacao	ILLUMINA	P000078	SRP217924	Plant	CostaRica	NorthAmerica	StageE	CostaRica:TheTropicalAgriculturalResearchandHigherEducationCenter(CATIE)	Leaves		NA-916	Nanay	NA-916	Resistant
PRJNA558793	SRR14022554	WGS	fastq,run.zq,sra	SRX10399121	IlluminaNovaSeq6000	G0094	PAIRED	GENOMIC	Theobromacacao	ILLUMINA	P000082	SRP217924	Plant	CostaRica	NorthAmerica	StageE	CostaRica:TheTropicalAgriculturalResearchandHigherEducationCenter(CATIE)	Leaves	SHAI001	Pound-7	Nanay	Pound-7	Resistant
PRJNA558793	SRR23409630	WGS	run.zq,sra,fastq	SRX19335650	NextSeq550	Criollo_13_250_S15	PAIRED	GENOMIC	Theobromacacao	ILLUMINA	Criollo_13_250_S15	SRP217924	Plant	CostaRica	NorthAmerica	MatureTree	CostaRica:CATIECacaoCollection	Leaf				Criollo-13
PRJNA558793	SRR23468785	WGS	sra,run.zq,fastq	SRX19371847	HiSeqXTen	Sca6CWD4350	PAIRED	GENOMIC	Theobromacacao	ILLUMINA	Sca6CWD4350	SRP217924	Plant	USA	NorthAmerica	mature	USA:PennStateGreenhouseJ	leaf	Sca6			Sca6
PRJNA558793	SRR23468786	WGS	run.zq,fastq,sra	SRX19371846	HiSeqXTen	ICS1550nt	PAIRED	GENOMIC	Theobromacacao	ILLUMINA	ICS1550nt	SRP217924	Plant	USA	NorthAmerica	mature	USA:PennStateGreenhouseJ	leaf	LCTEEN332			ICS1
PRJNA558793	SRR23468787	WGS	fastq,sra,run.zq	SRX19371845	HiSeqXTen	ICS1350nt	PAIRED	GENOMIC	Theobromacacao	ILLUMINA	ICS1350nt	SRP217924	Plant	USA	NorthAmerica	mature	USA:PennStateGreenhouseJ	leaf	ICS1			ICS1
PRJNA734904	SRR14743662	WGS	fastq,sra,run.zq	SRX11078460	IlluminaHiSeq2500	FCM26	PAIRED	GENOMIC	Theobromacacao	ILLUMINA	FCM26	SRP322922	Plant	Colombia	SouthAmerica	notapplicable	Colombia:SanVicente	leaf	notapplicable	notcollected	CRIOLLO
PRJNA734904	SRR14743665	WGS	fastq,run.zq,sra	SRX11078457	IlluminaHiSeq2500	FCM20	PAIRED	GENOMIC	Theobromacacao	ILLUMINA	FCM20	SRP322922	Plant	Colombia	SouthAmerica	notapplicable	Colombia:SanVicente	leaf	notapplicable	notcollected	AMELONADO
PRJNA734904	SRR14743672	WGS	fastq,sra,run.zq	SRX11078450	IlluminaHiSeq2500	FCM11	PAIRED	GENOMIC	Theobromacacao	ILLUMINA	FCM11	SRP322922	Plant	Colombia	SouthAmerica	notapplicable	Colombia:SanVicente	leaf	notapplicable	notcollected	NACIONAL
PRJNA734904	SRR14743677	WGS	run.zq,fastq,sra	SRX11078445	IlluminaHiSeq2500	EET61	PAIRED	GENOMIC	Theobromacacao	ILLUMINA	EET61	SRP322922	Plant	Ecuador	SouthAmerica	notapplicable	Ecuador	leaf	notapplicable	notcollected	NACIONAL
PRJNA734904	SRR14743678	WGS	fastq,sra,run.zq	SRX11078444	IlluminaHiSeq2500	EET6	PAIRED	GENOMIC	Theobromacacao	ILLUMINA	EET6	SRP322922	Plant	Ecuador	SouthAmerica	notapplicable	Ecuador	leaf	notapplicable	notcollected	AMELONADO
PRJNA734904	SRR14743680	WGS	run.zq,fastq,sra	SRX11078442	IlluminaHiSeq2500	EET400	PAIRED	GENOMIC	Theobromacacao	ILLUMINA	EET400	SRP322922	Plant	Ecuador	SouthAmerica	notapplicable	Ecuador	leaf	notapplicable	notcollected	NANAY
PRJNA734904	SRR14743681	WGS	fastq,run.zq,sra	SRX11078441	IlluminaHiSeq2500	EET399	PAIRED	GENOMIC	Theobromacacao	ILLUMINA	EET399	SRP322922	Plant	Ecuador	SouthAmerica	notapplicable	Ecuador	leaf	notapplicable	notcollected	CRIOLLO
PRJNA734904	SRR14743687	WGS	sra,fastq,run.zq	SRX11078435	IlluminaHiSeq2500	EBC48	PAIRED	GENOMIC	Theobromacacao	ILLUMINA	EBC48	SRP322922	Plant	Colombia	SouthAmerica	notapplicable	Colombia:Amazonas	leaf	notapplicable	notcollected	CRIOLLO
PRJNA734904	SRR14743688	WGS	run.zq,fastq,sra	SRX11078434	IlluminaHiSeq2500	EBC29	PAIRED	GENOMIC	Theobromacacao	ILLUMINA	EBC29	SRP322922	Plant	Colombia	SouthAmerica	notapplicable	Colombia:Caqueta	leaf	notapplicable	notcollected	CURARAY
PRJNA734904	SRR14743691	WGS	sra,fastq,run.zq	SRX11078431	IlluminaHiSeq2500	EBC143	PAIRED	GENOMIC	Theobromacacao	ILLUMINA	EBC143	SRP322922	Plant	Colombia	SouthAmerica	notapplicable	Colombia:Caqueta	leaf	notapplicable	notcollected	IQUITOS
PRJNA734904	SRR14743696	WGS	fastq,run.zq,sra	SRX11078426	IlluminaHiSeq2500	DON-DIEGO	PAIRED	GENOMIC	Theobromacacao	ILLUMINA	DON-DIEGO	SRP322922	Plant	Colombia	SouthAmerica	notapplicable	Colombia	leaf	notapplicable	notcollected	CRIOLLO
PRJNA734904	SRR14743706	WGS	fastq,sra,run.zq	SRX11078416	IlluminaHiSeq2500	CHOCOLATE2	PAIRED	GENOMIC	Theobromacacao	ILLUMINA	CHOCOLATE2	SRP322922	Plant	Colombia	SouthAmerica	notapplicable	Colombia	leaf	notapplicable	notcollected	AMELONADO
PRJNA734904	SRR14743708	WGS	run.zq,sra,fastq	SRX11078414	IlluminaHiSeq2500	CHOCO774	PAIRED	GENOMIC	Theobromacacao	ILLUMINA	CHOCO774	SRP322922	Plant	Colombia	SouthAmerica	notapplicable	Colombia	leaf	notapplicable	notcollected	IQUITOS
PRJNA734904	SRR14743710	WGS	run.zq,fastq,sra	SRX11078412	IlluminaHiSeq2500	CATONGO	PAIRED	GENOMIC	Theobromacacao	ILLUMINA	CATONGO	SRP322922	Plant	Brazil	SouthAmerica	notapplicable	Brazil	leaf	notapplicable	notcollected	CURARAY
PRJNA734904	SRR14743746	WGS	sra,run.zq,fastq	SRX11078376	IlluminaHiSeq2500	UF676	PAIRED	GENOMIC	Theobromacacao	ILLUMINA	UF676	SRP322922	Plant	CostaRica	NorthAmerica	notapplicable	CostaRica	leaf	notapplicable	notcollected	AMELONADO
PRJNA734904	SRR14743747	WGS	run.zq,sra,fastq	SRX11078375	IlluminaHiSeq2500	UF667	PAIRED	GENOMIC	Theobromacacao	ILLUMINA	UF667	SRP322922	Plant	CostaRica	NorthAmerica	notapplicable	CostaRica	leaf	notapplicable	notcollected	AMELONADO
PRJNA734904	SRR14743748	WGS	run.zq,fastq,sra	SRX11078374	IlluminaHiSeq2500	UF29	PAIRED	GENOMIC	Theobromacacao	ILLUMINA	UF29	SRP322922	Plant	CostaRica	NorthAmerica	notapplicable	CostaRica	leaf	notapplicable	notcollected	MARANON
PRJNA734904	SRR14743749	WGS	run.zq,fastq,sra	SRX11078373	IlluminaHiSeq2500	UF273	PAIRED	GENOMIC	Theobromacacao	ILLUMINA	UF273	SRP322922	Plant	CostaRica	NorthAmerica	notapplicable	CostaRica	leaf	notapplicable	notcollected	ADMIXED
PRJNA734904	SRR14743753	WGS	fastq,sra,run.zq	SRX11078369	IlluminaHiSeq2500	TUMACO3	PAIRED	GENOMIC	Theobromacacao	ILLUMINA	TUMACO3	SRP322922	Plant	Colombia	SouthAmerica	notapplicable	Colombia:Tumaco	leaf	notapplicable	notcollected	AMELONADO
PRJNA734904	SRR14743757	WGS	sra,fastq,run.zq	SRX11078365	IlluminaHiSeq2500	TSH812	PAIRED	GENOMIC	Theobromacacao	ILLUMINA	TSH812	SRP322922	Plant	TrinidadandTobago	NorthAmerica	notapplicable	TrinidadandTobago:Trinidad	leaf	notapplicable	notcollected	NACIONAL
PRJNA734904	SRR14743758	WGS	run.zq,fastq,sra	SRX11078364	IlluminaHiSeq2500	TSH792	PAIRED	GENOMIC	Theobromacacao	ILLUMINA	TSH792	SRP322922	Plant	TrinidadandTobago	NorthAmerica	notapplicable	TrinidadandTobago:Trinidad	leaf	notapplicable	notcollected	AMELONADO
PRJNA734904	SRR14743759	WGS	sra,fastq,run.zq	SRX11078363	IlluminaHiSeq2500	TSH660	PAIRED	GENOMIC	Theobromacacao	ILLUMINA	TSH660	SRP322922	Plant	TrinidadandTobago	NorthAmerica	notapplicable	TrinidadandTobago:Trinidad	leaf	notapplicable	notcollected	IQUITOS
PRJNA734904	SRR14743760	WGS	fastq,sra,run.zq	SRX11078362	IlluminaHiSeq2500	TSH565	PAIRED	GENOMIC	Theobromacacao	ILLUMINA	TSH565	SRP322922	Plant	TrinidadandTobago	NorthAmerica	notapplicable	TrinidadandTobago:Trinidad	leaf	notapplicable	notcollected	CONTAMANA
PRJNA734904	SRR14743763	WGS	fastq,sra,run.zq	SRX11078359	IlluminaHiSeq2500	TrinidadandTobago:Trinidad	PAIRED	GENOMIC	Theobromacacao	ILLUMINA	TrinidadandTobago:Trinidad	SRP322922	Plant	TrinidadandTobago	NorthAmerica	notapplicable	TrinidadandTobago:Trinidad	leaf	notapplicable	notcollected	AMELONADO
PRJNA734904	SRR14743764	WGS	fastq,run.zq,sra	SRX11078358	IlluminaHiSeq2500	TO5	PAIRED	GENOMIC	Theobromacacao	ILLUMINA	TO5	SRP322922	Plant	Ecuador	SouthAmerica	notapplicable	Ecuador	leaf	notapplicable	notcollected	CRIOLLO
PRJNA734904	SRR14743771	WGS	sra,run.zq,fastq	SRX11078351	IlluminaHiSeq2500	TCS34	PAIRED	GENOMIC	Theobromacacao	ILLUMINA	TCS34	SRP322922	Plant	Colombia	SouthAmerica	notapplicable	Colombia	leaf	notapplicable	notcollected	AMELONADO
PRJNA734904	SRR14743778	WGS	run.zq,fastq,sra	SRX11078344	IlluminaHiSeq2500	TCS25	PAIRED	GENOMIC	Theobromacacao	ILLUMINA	TCS25	SRP322922	Plant	Colombia	SouthAmerica	notapplicable	Colombia	leaf	notapplicable	notcollected	IQUITOS
PRJNA734904	SRR14743783	WGS	fastq,sra,run.zq	SRX11078339	IlluminaHiSeq2500	TCS06	PAIRED	GENOMIC	Theobromacacao	ILLUMINA	TCS06	SRP322922	Plant	Colombia	SouthAmerica	notapplicable	Colombia	leaf	notapplicable	notcollected	CRIOLLO
PRJNA734904	SRR14743811	WGS	run.zq,sra,fastq	SRX11078311	IlluminaHiSeq2500	SCA6	PAIRED	GENOMIC	Theobromacacao	ILLUMINA	SCA6	SRP322922	Plant	Ecuador	SouthAmerica	notapplicable	Ecuador	leaf	notapplicable	notcollected	CONTAMANA
PRJNA734904	SRR14743812	WGS	sra,run.zq,fastq	SRX11078310	IlluminaHiSeq2500	SCA12	PAIRED	GENOMIC	Theobromacacao	ILLUMINA	SCA12	SRP322922	Plant	Ecuador	SouthAmerica	notapplicable	Ecuador	leaf	notapplicable	notcollected	AMELONADO
PRJNA734904	SRR14743823	WGS	sra,fastq,run.zq	SRX11078299	IlluminaHiSeq2500	SC32	PAIRED	GENOMIC	Theobromacacao	ILLUMINA	SC32	SRP322922	Plant	Colombia	SouthAmerica	notapplicable	Colombia	leaf	notapplicable	notcollected	AMELONADO
PRJNA734904	SRR14743824	WGS	sra,fastq,run.zq	SRX11078298	IlluminaHiSeq2500	SC24	PAIRED	GENOMIC	Theobromacacao	ILLUMINA	SC24	SRP322922	Plant	Colombia	SouthAmerica	notapplicable	Colombia	leaf	notapplicable	notcollected	CRIOLLO
PRJNA734904	SRR14743844	WGS	sra,fastq,run.zq	SRX11078278	IlluminaHiSeq2500	PA150	PAIRED	GENOMIC	Theobromacacao	ILLUMINA	PA150	SRP322922	Plant	Peru	SouthAmerica	notapplicable	Peru	leaf	notapplicable	notcollected	MARANON
PRJNA734904	SRR14743845	WGS	run.zq,fastq,sra	SRX11078277	IlluminaHiSeq2500	PA121	PAIRED	GENOMIC	Theobromacacao	ILLUMINA	PA121	SRP322922	Plant	Peru	SouthAmerica	notapplicable	Peru	leaf	notapplicable	notcollected	MARANON
PRJNA734904	SRR14743846	WGS	run.zq,fastq,sra	SRX11078276	IlluminaHiSeq2500	P7	PAIRED	GENOMIC	Theobromacacao	ILLUMINA	P7	SRP322922	Plant	Peru	SouthAmerica	notapplicable	Peru	leaf	notapplicable	notcollected	NANAY
PRJNA734904	SRR14743847	WGS	sra,fastq,run.zq	SRX11078275	IlluminaHiSeq2500	P18	PAIRED	GENOMIC	Theobromacacao	ILLUMINA	P18	SRP322922	Plant	Peru	SouthAmerica	notapplicable	Peru	leaf	notapplicable	notcollected	CURARAY
PRJNA734904	SRR14743853	WGS	fastq,sra,run.zq	SRX11078269	IlluminaHiSeq2500	IMC67	PAIRED	GENOMIC	Theobromacacao	ILLUMINA	IMC67	SRP322922	Plant	Peru	SouthAmerica	notapplicable	Peru	leaf	notapplicable	notcollected	IQUITOS
PRJNA734904	SRR14743858	WGS	sra,fastq,run.zq	SRX11078264	IlluminaHiSeq2500	ICS95	PAIRED	GENOMIC	Theobromacacao	ILLUMINA	ICS95	SRP322922	Plant	TrinidadandTobago	NorthAmerica	notapplicable	TrinidadandTobago:Trinidad	leaf		notcollected	ADMIXED
PRJNA734904	SRR14743860	WGS	fastq,sra,run.zq	SRX11078262	IlluminaHiSeq2500	ICS60	PAIRED	GENOMIC	Theobromacacao	ILLUMINA	ICS60	SRP322922	Plant	TrinidadandTobago	NorthAmerica	notapplicable	TrinidadandTobago:Trinidad	leaf	notapplicable	notcollected	AMELONADO
PRJNA734904	SRR14743863	WGS	run.zq,fastq,sra	SRX11078259	IlluminaHiSeq2500	ICS40	PAIRED	GENOMIC	Theobromacacao	ILLUMINA	ICS40	SRP322922	Plant	TrinidadandTobago	NorthAmerica	notapplicable	TrinidadandTobago:Trinidad	leaf	notapplicable	notcollected	ADMIXED
PRJNA734904	SRR14743866	WGS	sra,run.zq,fastq	SRX11078256	IlluminaHiSeq2500	ICS1	PAIRED	GENOMIC	Theobromacacao	ILLUMINA	ICS1	SRP322922	Plant	TrinidadandTobago	NorthAmerica	notapplicable	TrinidadandTobago:Trinidad	leaf	notapplicable	notcollected	AMELONADO
PRJNA734904	SRR14743874	WGS	run.zq,fastq,sra	SRX11078248	IlluminaHiSeq2500	GS10	PAIRED	GENOMIC	Theobromacacao	ILLUMINA	GS10	SRP322922	Plant	Grenada	NorthAmerica	notapplicable	Grenada	leaf	notapplicable	notcollected	AMELONADO
PRJNA734904	SRR14743880	WGS	run.zq,sra,fastq	SRX11078242	IlluminaHiSeq2500	FCM40	PAIRED	GENOMIC	Theobromacacao	ILLUMINA	FCM40	SRP322922	Plant	Colombia	SouthAmerica	notapplicable	Colombia:Rionegro	leaf	notapplicable	notcollected	IQUITOS
PRJNA734904	SRR14743883	WGS	run.zq,fastq,sra	SRX11078239	IlluminaHiSeq2500	FCM31	PAIRED	GENOMIC	Theobromacacao	ILLUMINA	FCM31	SRP322922	Plant	Colombia	SouthAmerica	notapplicable	Colombia	leaf	notapplicable	notcollected	NACIONAL
PRJNA880462	SRR21562031	WGS	sra,fastq,run.zq	SRX17564548	IlluminaNovaSeq6000	CMK_GW	PAIRED	GENOMIC	Theobromacacao	ILLUMINA	NA_672	SRP397050	Plant	Peru	SouthAmerica	Adulttree	Peru	Leaf	NA672
PRJNA880462	SRR21562033	WGS	run.zq,fastq,sra	SRX17564546	IlluminaNovaSeq6000	CMK_GU	PAIRED	GENOMIC	Theobromacacao	ILLUMINA	NA_127	SRP397050	Plant	Peru	SouthAmerica	Adulttree	Peru	Leaf	NA127
PRJNA880462	SRR21562035	WGS	fastq,sra,run.zq	SRX17564544	IlluminaNovaSeq6000	CMK_DN	PAIRED	GENOMIC	Theobromacacao	ILLUMINA	MO_76	SRP397050	Plant	Peru	SouthAmerica	Adulttree	Peru	Leaf	MO76
PRJNA880462	SRR21562037	WGS	fastq,sra,run.zq	SRX17564542	IlluminaNovaSeq6000	Cacao_S1	PAIRED	GENOMIC	Theobromacacao	ILLUMINA	Mat1-6	SRP397050	Plant	CostaRica	NorthAmerica	Adulttree	CostaRica	Leaf	MATINA1-6
PRJNA880462	SRR21562038	WGS	sra,fastq,run.zq	SRX17564541	IlluminaNovaSeq6000	CMK_FT	PAIRED	GENOMIC	Theobromacacao	ILLUMINA	LIB_3	SRP397050	Plant	Nicaragua	NorthAmerica	Adulttree	Nicaragua	Leaf	LIB3
PRJNA880462	SRR21562044	WGS	sra,run.zq,fastq	SRX17564535	IlluminaNovaSeq6000	CMK_CI	PAIRED	GENOMIC	Theobromacacao	ILLUMINA	LCTEEN_31	SRP397050	Plant	Ecuador	SouthAmerica	Adulttree	Ecuador	Leaf	LCTEEN255
PRJNA880462	SRR21562047	WGS	sra,run.zq,fastq	SRX17564532	IlluminaNovaSeq6000	CMK_CW	PAIRED	GENOMIC	Theobromacacao	ILLUMINA	LCTEEN_63	SRP397050	Plant	Ecuador	SouthAmerica	Adulttree	Ecuador	Leaf	LCTEEN63
PRJNA880462	SRR21562053	WGS	sra,run.zq,fastq	SRX17564526	IlluminaNovaSeq6000	CMK_AF	PAIRED	GENOMIC	Theobromacacao	ILLUMINA	Tiwi_61	SRP397050	Plant	Ecuador	SouthAmerica	Adulttree	Ecuador	Leaf	TIWI61
PRJNA880462	SRR21562063	WGS	run.zq,fastq,sra	SRX17564516	IlluminaNovaSeq6000	CMK_DP	PAIRED	GENOMIC	Theobromacacao	ILLUMINA	VEN_20	SRP397050	Plant	Venezuela	SouthAmerica	Adulttree	Venezuela	Leaf	SNA604	PA-71	Maranon		Susceptible
PRJNA880462	SRR21562070	WGS	fastq,run.zq,sra	SRX17564509	IlluminaNovaSeq6000	CMK_HG	PAIRED	GENOMIC	Theobromacacao	ILLUMINA	YACU_19	SRP397050	Plant	Ecuador	SouthAmerica	Adulttree	Ecuador:Zamora	Leaf	IMC48
PRJNA880462	SRR21562082	WGS	sra,run.zq,fastq	SRX17564497	IlluminaNovaSeq6000	CMK_CS	PAIRED	GENOMIC	Theobromacacao	ILLUMINA	LCTEEN_403	SRP397050	Plant	Ecuador	SouthAmerica	Adulttree	Ecuador	Leaf	LCTEEN122
PRJNA880462	SRR21562088	WGS	sra,run.zq,fastq	SRX17564491	IlluminaNovaSeq6000	CMK_EW	PAIRED	GENOMIC	Theobromacacao	ILLUMINA	CSUL_7	SRP397050	Plant	Brazil	SouthAmerica	Adulttree	Brazil	Leaf	CSUL7
PRJNA880462	SRR21562101	WGS	run.zq,fastq,sra	SRX17564478	IlluminaNovaSeq6000	CMK_EV	PAIRED	GENOMIC	Theobromacacao	ILLUMINA	CSUL_3	SRP397050	Plant	Brazil	SouthAmerica	Adulttree	Brazil	Leaf	CSUL3
PRJNA880462	SRR21562103	WGS	run.zq,sra,fastq	SRX17564476	IlluminaNovaSeq6000	CMK_CC	PAIRED	GENOMIC	Theobromacacao	ILLUMINA	LCTEEN_246	SRP397050	Plant	Ecuador	SouthAmerica	Adulttree	Ecuador	Leaf	LCTEEN246
PRJNA880462	SRR21562104	WGS	fastq,sra,run.zq	SRX17564475	IlluminaNovaSeq6000	CMK_GO	PAIRED	GENOMIC	Theobromacacao	ILLUMINA	GU_278_A	SRP397050	Plant	FrenchGuiana	SouthAmerica	Adulttree	FrenchGuiana	Leaf	GU278-A
PRJNA880462	SRR21562105	WGS	run.zq,sra,fastq	SRX17564474	IlluminaNovaSeq6000	CMK_GN	PAIRED	GENOMIC	Theobromacacao	ILLUMINA	GU_134_B	SRP397050	Plant	FrenchGuiana	SouthAmerica	Adulttree	FrenchGuiana	Leaf	GU_134_B
PRJNA880462	SRR21562109	WGS	run.zq,sra,fastq	SRX17564470	IlluminaNovaSeq6000	CMK_FF	PAIRED	GENOMIC	Theobromacacao	ILLUMINA	CACAO_2	SRP397050	Plant	Mexico	NorthAmerica	Adulttree	Mexico:Yucatan	Leaf	CACAO2
PRJNA880462	SRR21562117	WGS	fastq,sra,run.zq	SRX17564462	IlluminaNovaSeq6000	CMK_FR	PAIRED	GENOMIC	Theobromacacao	ILLUMINA	B97_EX1_C3	SRP397050	Plant	Belize	NorthAmerica	Adulttree	Belize	Leaf	B97-EX1-C3
PRJNA880462	SRR21562118	WGS	run.zq,sra,fastq	SRX17564461	IlluminaNovaSeq6000	CMK_GC	PAIRED	GENOMIC	Theobromacacao	ILLUMINA	EBC_148_S9	SRP397050	Plant	Colombia	SouthAmerica	Adulttree	Colombia	Leaf	EBC148-S9
PRJNA880462	SRR21562122	WGS	fastq,sra,run.zq	SRX17564457	IlluminaNovaSeq6000	CMK_FP	PAIRED	GENOMIC	Theobromacacao	ILLUMINA	ZEA	SRP397050	Plant	Venezuela	SouthAmerica	Adulttree	Venezuela:Merida	Leaf	TEO3
PRJNA880462	SRR21562138	WGS	fastq,run.zq,sra	SRX17564441	IlluminaNovaSeq6000	CMK_DI	PAIRED	GENOMIC	Theobromacacao	ILLUMINA	SNA_1003	SRP397050	Plant	Ecuador	SouthAmerica	Adulttree	Ecuador	Leaf	LCTEEN325
PRJNA880462	SRR21562146	WGS	fastq,run.zq,sra	SRX17564433	IlluminaNovaSeq6000	CMK_HF	PAIRED	GENOMIC	Theobromacacao	ILLUMINA	SCA_6	SRP397050	Plant	Peru	SouthAmerica	Adulttree	Peru	Leaf	SCA6
PRJNA880462	SRR21562148	WGS	fastq,sra,run.zq	SRX17564431	IlluminaNovaSeq6000	CMK_HD	PAIRED	GENOMIC	Theobromacacao	ILLUMINA	SCA_12	SRP397050	Plant	Peru	SouthAmerica	Adulttree	Peru	Leaf	EBC6-401
PRJNA880462	SRR21562151	WGS	run.zq,sra,fastq	SRX17564428	IlluminaNovaSeq6000	CMK_FC	PAIRED	GENOMIC	Theobromacacao	ILLUMINA	RB_49	SRP397050	Plant	Brazil	SouthAmerica	Adulttree	Brazil	Leaf	RB49
PRJNA880462	SRR21562153	WGS	sra,fastq,run.zq	SRX17564426	IlluminaNovaSeq6000	CMK_FB	PAIRED	GENOMIC	Theobromacacao	ILLUMINA	RB_48	SRP397050	Plant	Brazil	SouthAmerica	Adulttree	Brazil	Leaf	YACU16
PRJNA880462	SRR21562154	WGS	fastq,run.zq,sra	SRX17564425	IlluminaNovaSeq6000	CMK_FD	PAIRED	GENOMIC	Theobromacacao	ILLUMINA	RB_46	SRP397050	Plant	Brazil	SouthAmerica	Adulttree	Brazil	Leaf	RB46
PRJNA880462	SRR21562155	WGS	run.zq,fastq,sra	SRX17564424	IlluminaNovaSeq6000	CMK_FA	PAIRED	GENOMIC	Theobromacacao	ILLUMINA	RB_43	SRP397050	Plant	Brazil	SouthAmerica	Adulttree	Brazil	Leaf	RB43
PRJNA880462	SRR21562156	WGS	sra,fastq,run.zq	SRX17564423	IlluminaNovaSeq6000	CMK_EZ	PAIRED	GENOMIC	Theobromacacao	ILLUMINA	RB_41	SRP397050	Plant	Brazil	SouthAmerica	Adulttree	Brazil	Leaf	RB41
PRJNA880462	SRR21562157	WGS	sra,run.zq,fastq	SRX17564422	IlluminaNovaSeq6000	CMK_FE	PAIRED	GENOMIC	Theobromacacao	ILLUMINA	RB_37	SRP397050	Plant	Brazil	SouthAmerica	Adulttree	Brazil	Leaf	B97-61/B2
PRJNA880462	SRR21562158	WGS	run.zq,fastq,sra	SRX17564421	IlluminaNovaSeq6000	CMK_EY	PAIRED	GENOMIC	Theobromacacao	ILLUMINA	RB_33_3	SRP397050	Plant	Brazil	SouthAmerica	Adulttree	Brazil	Leaf	RB33-3
PRJNA880462	SRR21562159	WGS	sra,fastq,run.zq	SRX17564420	IlluminaNovaSeq6000	CMK_EX	PAIRED	GENOMIC	Theobromacacao	ILLUMINA	RB_29	SRP397050	Plant	Brazil	SouthAmerica	Adulttree	Brazil	Leaf	TIWI52
PRJNA880462	SRR21562161	WGS	run.zq,sra,fastq	SRX17564418	IlluminaNovaSeq6000	CMK_CA	PAIRED	GENOMIC	Theobromacacao	ILLUMINA	LCTEEN_221	SRP397050	Plant	Ecuador	SouthAmerica	Adulttree	Ecuador	Leaf	LCTEEN221
PRJNA880462	SRR21562165	WGS	run.zq,sra,fastq	SRX17564414	IlluminaNovaSeq6000	CMK_BX	PAIRED	GENOMIC	Theobromacacao	ILLUMINA	LCTEEN_212_S4	SRP397050	Plant	Ecuador	SouthAmerica	Adulttree	Ecuador	Leaf	NA127
PRJNA880462	SRR21562173	WGS	fastq,sra,run.zq	SRX17564406	IlluminaNovaSeq6000	CMK_GH	PAIRED	GENOMIC	Theobromacacao	ILLUMINA	EBC_6_S10	SRP397050	Plant	Colombia	SouthAmerica	Adulttree	Colombia	Leaf	GUAY1
PRJNA880462	SRR21562176	WGS	run.zq,fastq,sra	SRX17564403	IlluminaNovaSeq6000	CMK_GG	PAIRED	GENOMIC	Theobromacacao	ILLUMINA	EBC_48	SRP397050	Plant	Colombia	SouthAmerica	Adulttree	Colombia	Leaf	LIB3	PA-13	Maranon		Resistant
PRJNA880462	SRR21562178	WGS	fastq,run.zq,sra	SRX17564401	IlluminaNovaSeq6000	CMK_GT	PAIRED	GENOMIC	Theobromacacao	ILLUMINA	IMC_67	SRP397050	Plant	Peru	SouthAmerica	Adulttree	Peru	Leaf	PAL8-A1
PRJNA880462	SRR21562179	WGS	run.zq,sra,fastq	SRX17564400	IlluminaNovaSeq6000	CMK_GS	PAIRED	GENOMIC	Theobromacacao	ILLUMINA	IMC_65	SRP397050	Plant	Peru	SouthAmerica	Adulttree	Peru	Leaf	IMC65
PRJNA880462	SRR21562180	WGS	fastq,run.zq,sra	SRX17564399	IlluminaNovaSeq6000	CMK_FV	PAIRED	GENOMIC	Theobromacacao	ILLUMINA	Catongo	SRP397050	Plant	Brazil	SouthAmerica	Adulttree	Brazil	Leaf	CATONGO
PRJNA880462	SRR21562184	WGS	run.zq,sra,fastq	SRX17564395	IlluminaNovaSeq6000	CMK_DS	PAIRED	GENOMIC	Theobromacacao	ILLUMINA	GUAY_2	SRP397050	Plant	Ecuador	SouthAmerica	Adulttree	Ecuador	Leaf	SCA11
PRJNA880462	SRR21562188	WGS	run.zq,sra,fastq	SRX17564391	IlluminaNovaSeq6000	CMK_AO	PAIRED	GENOMIC	Theobromacacao	ILLUMINA	Pang_6	SRP397050	Plant	Ecuador	SouthAmerica	Adulttree	Ecuador:Zamora	Leaf	PANG6
PRJNA880462	SRR21562192	WGS	fastq,sra,run.zq	SRX17564387	IlluminaNovaSeq6000	CMK_AV	PAIRED	GENOMIC	Theobromacacao	ILLUMINA	Pang_18	SRP397050	Plant	Ecuador	SouthAmerica	Adulttree	Ecuador:Zamora	Leaf	SP1
PRJNA880462	SRR21562211	WGS	fastq,run.zq,sra	SRX17564368	IlluminaNovaSeq6000	CMK_EK	PAIRED	GENOMIC	Theobromacacao	ILLUMINA	EBC_122	SRP397050	Plant	Colombia	SouthAmerica	Adulttree	Colombia	Leaf	LCTEEN415
PRJNA880462	SRR21562212	WGS	sra,fastq,run.zq	SRX17564367	IlluminaNovaSeq6000	CMK_FX	PAIRED	GENOMIC	Theobromacacao	ILLUMINA	B_97-61-B2	SRP397050	Plant	Belize	NorthAmerica	Adulttree	Belize	Leaf	B97-61/B2

## Sheet: Table S2
	Table S2 List of Arabidopsis thaliana (TAIR10) disease resistance genes retrieved from Phytozome
Organism	Description
A.thaliana TAIR10	AT1G65850 - Disease resistance protein (TIR-NBS-LRR class) family
A.thaliana TAIR10	AT5G45260 - ARABIDOPSIS THALIANA WRKY DOMAIN PROTEIN 52,Disease resistance protein (TIR-NBS-LRR class),RESISTANT TO RALSTONIA SOLANACEARUM 1,SENSITIVE TO LOW HUMIDITY 1
A.thaliana TAIR10	AT2G14080 - Disease resistance protein (TIR-NBS-LRR class) family
A.thaliana TAIR10	AT3G44480 - Disease resistance protein (TIR-NBS-LRR class) family,recognition of peronospora parasitica 1
A.thaliana TAIR10	AT3G44670 - Disease resistance protein (TIR-NBS-LRR class) family
A.thaliana TAIR10	AT4G20380 - LESION SIMULATING DISEASE 1,LSD1 zinc finger family protein
A.thaliana TAIR10	AT1G63860 - Disease resistance protein (TIR-NBS-LRR class) family
A.thaliana TAIR10	AT5G36930 - Disease resistance protein (TIR-NBS-LRR class) family
A.thaliana TAIR10	AT1G31540 - Disease resistance protein (TIR-NBS-LRR class) family
A.thaliana TAIR10	AT4G16950 - Disease resistance protein (TIR-NBS-LRR class) family,RECOGNITION OF PERONOSPORA PARASITICA 5
A.thaliana TAIR10	AT5G45060 - Disease resistance protein (TIR-NBS-LRR class) family
A.thaliana TAIR10	AT5G40100 - Disease resistance protein (TIR-NBS-LRR class) family
A.thaliana TAIR10	AT5G42510 - Disease resistance-responsive (dirigent-like protein) family protein
A.thaliana TAIR10	AT5G35450 - Disease resistance protein (CC-NBS-LRR class) family
A.thaliana TAIR10	AT1G13470 - Protein of unknown function (DUF1262)
A.thaliana TAIR10	AT2G29650 - anion transporter 1,phosphate transporter 4;1
A.thaliana TAIR10	AT1G09970 - Leucine-rich receptor-like protein kinase family protein,receptor-like kinase 7
A.thaliana TAIR10	AT1G34750 - Protein phosphatase 2C family protein
A.thaliana TAIR10	AT3G21630 - chitin elicitor receptor kinase 1,LysM-containing receptor-like kinase 1,LYSM DOMAIN RECEPTOR-LIKE KINASE 1
A.thaliana TAIR10	AT3G51570 - Disease resistance protein (TIR-NBS-LRR class) family
A.thaliana TAIR10	AT5G38340 - Disease resistance protein (TIR-NBS-LRR class) family
A.thaliana TAIR10	AT1G61105 - Toll-Interleukin-Resistance (TIR) domain family protein
A.thaliana TAIR10	AT4G11170 - Disease resistance protein (TIR-NBS-LRR class) family,Resistance Methylated Gene 1
A.thaliana TAIR10	AT1G33590 - Leucine-rich repeat (LRR) family protein
A.thaliana TAIR10	AT4G12020 - MAPK/ERK KINASE KINASE 4,MITOGEN-ACTIVATED PROTEIN KINASE KINASE KINASE 11,protein kinase family protein
A.thaliana TAIR10	AT4G26070 - MAP kinase/ ERK kinase 1,MITOGEN ACTIVATED PROTEIN KINASE KINASE 1
A.thaliana TAIR10	AT3G05660 - receptor like protein 33
A.thaliana TAIR10	AT1G11840 - glyoxalaseI 3,glyoxalase I homolog
A.thaliana TAIR10	AT1G56540 - Disease resistance protein (TIR-NBS-LRR class) family
A.thaliana TAIR10	AT4G36140 - disease resistance protein (TIR-NBS-LRR class), putative
A.thaliana TAIR10	AT5G63860 - Regulator of chromosome condensation (RCC1) family protein,UVB-RESISTANCE 8
A.thaliana TAIR10	AT5G39020 - Malectin/receptor-like protein kinase family protein
A.thaliana TAIR10	AT4G33680 - ABERRANT GROWTH AND DEATH 2,Pyridoxal phosphate (PLP)-dependent transferases superfamily protein
A.thaliana TAIR10	AT5G37480
A.thaliana TAIR10	AT2G30250 - WRKY DNA-binding protein 25
A.thaliana TAIR10	AT3G05650 - receptor like protein 32
A.thaliana TAIR10	AT5G50200 - nitrate transmembrane transporters,NITRATE TRANSPORTER 3.1,WOUND-RESPONSIVE 3
A.thaliana TAIR10	AT4G16660 - heat shock protein 70 (Hsp 70) family protein
A.thaliana TAIR10	AT4G13820 - Leucine-rich repeat (LRR) family protein
A.thaliana TAIR10	AT1G17615 - Disease resistance protein (TIR-NBS class),TIR-NBS2
A.thaliana TAIR10	AT5G46490 - Disease resistance protein (TIR-NBS-LRR class) family
A.thaliana TAIR10	AT5G22330 - P-loop containing nucleoside triphosphate hydrolases superfamily protein,RESISTANCE TO PSEUDOMONAS SYRINGAE PV MACULICOLA INTERACTOR 1
A.thaliana TAIR10	AT5G44910 - Toll-Interleukin-Resistance (TIR) domain family protein
A.thaliana TAIR10	AT5G58220 - allantoin synthase,transthyretin-like protein
A.thaliana TAIR10	AT1G18350 - BUSHY AND DWARF 1,MAP kinase kinase 7,MAP KINASE KINASE7
A.thaliana TAIR10	AT3G62600 - DNAJ heat shock family protein
A.thaliana TAIR10	AT5G41750 - Disease resistance protein (TIR-NBS-LRR class) family
A.thaliana TAIR10	AT3G44630 - Disease resistance protein (TIR-NBS-LRR class) family
A.thaliana TAIR10	AT1G18890 - calcium-dependent protein kinase 1
A.thaliana TAIR10	AT2G03760 - ARABIDOPSIS THALIANA SULFOTRANSFERASE 1,SULFOTRANSFERASE 1,sulfotransferase 202A1,sulphotransferase 12
A.thaliana TAIR10	AT2G46400 - WRKY DNA-binding protein 46,WRKY DNA-BINDING PROTEIN 46
A.thaliana TAIR10	AT1G57630 - Toll-Interleukin-Resistance (TIR) domain family protein
A.thaliana TAIR10	AT5G43470 - Disease resistance protein (CC-NBS-LRR class) family,HYPERSENSITIVE RESPONSE TO TCV,RECOGNITION OF PERONOSPORA PARASITICA 8,RESISTANT TO CMV(Y) 1
A.thaliana TAIR10	AT3G14000 - DZC (Disease resistance/zinc finger/chromosome condensation-like region) domain containing protein
A.thaliana TAIR10	AT5G43290 - ARABIDOPSIS THALIANA WRKY DNA-BINDING PROTEIN 49,WRKY DNA-binding protein 49
A.thaliana TAIR10	AT2G35650 - cellulose synthase like,CELLULOSE SYNTHASE LIKE A7
A.thaliana TAIR10	AT1G53230 - TEOSINTE BRANCHED 1, cycloidea and PCF transcription factor 3
A.thaliana TAIR10	AT2G05520 - ARABIDOPSIS GLYCINE RICH PROTEIN 3,glycine-rich protein 3,GLYCINE-RICH PROTEIN 3
A.thaliana TAIR10	AT2G17290 - ARABIDOPSIS THALIANA CALCIUM-DEPENDENT PROTEIN KINASE 6,ARABIDOPSIS THALIANA CALMODULIN-DOMAIN PROTEIN KINASE 3,calcium dependent protein kinase 6,Calcium-dependent protein kinase family protein
A.thaliana TAIR10	AT1G69270 - receptor-like protein kinase 1
A.thaliana TAIR10	AT3G49350 - Ypt/Rab-GAP domain of gyp1p superfamily protein
A.thaliana TAIR10	AT5G52810 - NAD(P)-binding Rossmann-fold superfamily protein,SAR DEFICIENT 4
A.thaliana TAIR10	AT1G04980 - ARABIDOPSIS THALIANA PROTEIN DISULFIDE ISOMERASE 10,PDI-like 2-2,PROTEIN DISULFIDE ISOMERASE
A.thaliana TAIR10	AT1G63870 - Disease resistance protein (TIR-NBS-LRR class) family
A.thaliana TAIR10	AT4G03280 - photosynthetic electron transfer C,PROTON GRADIENT REGULATION 1
A.thaliana TAIR10	AT4G29520 - (1 of 6) IPR008139 - Saposin B type domain
A.thaliana TAIR10	AT1G60320 - Toll-Interleukin-Resistance (TIR) domain family protein
A.thaliana TAIR10	AT5G22690 - Disease resistance protein (TIR-NBS-LRR class) family
A.thaliana TAIR10	AT3G58090 - Disease resistance-responsive (dirigent-like protein) family protein
A.thaliana TAIR10	AT5G60970 - TEOSINTE BRANCHED 1, cycloidea and PCF transcription factor 5
A.thaliana TAIR10	AT1G64070 - Disease resistance protein (TIR-NBS-LRR class) family,RESISTANCE TO LEPTOSPHAERIA MACULANS 1
A.thaliana TAIR10	AT4G16940 - Disease resistance protein (TIR-NBS-LRR class) family
A.thaliana TAIR10	AT2G20570 - ARABIDOPSIS GOLDEN2-LIKE 1,GBF's pro-rich region-interacting factor 1,GOLDEN2-LIKE 1
A.thaliana TAIR10	AT1G12280 - LRR and NB-ARC domains-containing disease resistance protein,suppressor of mkk1 mkk2 2
A.thaliana TAIR10	AT2G05940 - Protein kinase superfamily protein,RPM1-induced protein kinase
A.thaliana TAIR10	AT3G57240 - beta-1,3-glucanase 3
A.thaliana TAIR10	AT5G37260 - CIRCADIAN 1,CONSTITUTIVELY INDUCED RESISTANCE 1,Homeodomain-like superfamily protein,REVEILLE 2
A.thaliana TAIR10	AT3G28510 - P-loop containing nucleoside triphosphate hydrolases superfamily protein
A.thaliana TAIR10	AT2G35940 - BEL1-like homeodomain 1,embryo sac development arrest 29
A.thaliana TAIR10	AT5G45220 - Disease resistance protein (TIR-NBS-LRR class) family
A.thaliana TAIR10	AT2G41940 - zinc finger protein 8
A.thaliana TAIR10	AT5G06950 - bZIP transcription factor family protein,TGACG sequence-specific binding protein 2
A.thaliana TAIR10	AT1G69550 - disease resistance protein (TIR-NBS-LRR class)
A.thaliana TAIR10	AT2G20142 - Toll-Interleukin-Resistance (TIR) domain family protein
A.thaliana TAIR10	AT2G22540 - AGAMOUS-like 22,Flowering Arabidopsis QTL1,K-box region and MADS-box transcription factor family protein,SHORT VEGETATIVE PHASE
A.thaliana TAIR10	AT3G50930 - cytochrome BC1 synthesis,Outer Mitochondrial membrane protein of 66 kDa
A.thaliana TAIR10	AT5G55930 - ARABIDOPSIS THALIANA OLIGOPEPTIDE TRANSPORTER 1,oligopeptide transporter 1
A.thaliana TAIR10	AT1G70690 - HOPW1-1-INDUCED GENE1,PLASMODESMATA-LOCATED PROTEIN 5,Receptor-like protein kinase-related family protein
A.thaliana TAIR10	AT5G61420 - HIGH ALIPHATIC GLUCOSINOLATE 1,myb domain protein 28,PRODUCTION OF METHIONINE-DERIVED GLUCOSINOLATE 1
A.thaliana TAIR10	AT2G16365 - F-box family protein,PHOTOPERIODIC CONTROL OF HYPOCOTYL 1
A.thaliana TAIR10	AT4G19000 - ARABIDOPSIS THALIANA IWS2 (FROM YEAST INTERACTS WITH SPT6),Transcription elongation factor (TFIIS) family protein
A.thaliana TAIR10	AT5G56760 - serine acetyltransferase 1;1,SERINE ACETYLTRANSFERASE 5,SERINE ACETYLTRANSFERASE 52
A.thaliana TAIR10	AT2G46990 - indole-3-acetic acid inducible 20
A.thaliana TAIR10	AT2G20880 - ERF domain 53,Integrase-type DNA-binding superfamily protein
A.thaliana TAIR10	AT4G32260 - ATPase, F0 complex, subunit B/B', bacterial/chloroplast,PIGMENT DEFECTIVE 334
A.thaliana TAIR10	AT1G53240 - Lactate/malate dehydrogenase family protein,mitochondrial malate dehydrogenase 1
A.thaliana TAIR10	AT4G19040 - ENHANCED DISEASE RESISTANCE 2
A.thaliana TAIR10	AT3G17240 - lipoamide dehydrogenase 2
A.thaliana TAIR10	AT3G25860 - 2-oxoacid dehydrogenases acyltransferase family protein,PLASTID E2 SUBUNIT OF PYRUVATE DECARBOXYLASE
A.thaliana TAIR10	AT1G16590 - DNA-binding HORMA family protein
A.thaliana TAIR10	AT3G07230 - wound-responsive protein-related
A.thaliana TAIR10	AT2G26530 - Protein of unknown function (DUF1645)
A.thaliana TAIR10	AT1G32870 - Arabidopsis NAC domain containing protein 13,NAC domain protein 13
A.thaliana TAIR10	AT5G53960 - ATP binding;DNA binding;DNA topoisomerase (ATP-hydrolyzing)s
A.thaliana TAIR10	AT3G26420 - RNA-binding glycine-rich protein B2,RNA-binding (RRM/RBD/RNP motifs) family protein with retrovirus zinc finger-like domain,RZ-1A
A.thaliana TAIR10	AT3G55480 - beta-subunit of adaptor protein complex 3,protein affected traf&#64257;cking 2,protein affected trafficking 2,WEAK ACID TOLERANT 1
A.thaliana TAIR10	AT1G28010 - Arabidopsis thaliana ATP-binding cassette B14,ATP-binding cassette B14,multi-drug resistance 12,P-glycoprotein 14
A.thaliana TAIR10	AT4G02580 - NADH-ubiquinone oxidoreductase 24 kDa subunit, putative
A.thaliana TAIR10	AT4G04770 - ARABIDOPSIS THALIANA NUCLEOSOME ASSEMBLY PROTEIN 1,ATP-binding cassette I8,ATP binding cassette protein 1,LONG AFTER FR
A.thaliana TAIR10	AT4G15210 - ARABIDOPSIS THALIANA BETA-AMYLASE,beta-amylase 5,REDUCED BETA AMYLASE 1
A.thaliana TAIR10	AT1G17550 - homology to ABI2
A.thaliana TAIR10	AT4G19530 - disease resistance protein (TIR-NBS-LRR class) family
A.thaliana TAIR10	AT1G07000 - exocyst subunit exo70 family protein B2
A.thaliana TAIR10	AT5G52970 - thylakoid lumen 15.0 kDa protein
A.thaliana TAIR10	AT5G12430 - DNA J protein C31,Heat shock protein DnaJ with tetratricopeptide repeat,tetratricopeptide repeat 16
A.thaliana TAIR10	AT5G27920 - F-box family protein
A.thaliana TAIR10	AT4G34990 - myb domain protein 32
A.thaliana TAIR10	AT1G69370 - chorismate mutase 3
A.thaliana TAIR10	AT5G38850 - Disease resistance protein (TIR-NBS-LRR class)
A.thaliana TAIR10	AT2G39210 - Major facilitator superfamily protein
A.thaliana TAIR10	AT4G23000 - Calcineurin-like metallo-phosphoesterase superfamily protein
A.thaliana TAIR10	AT5G15650 - MURUS 5,reversibly glycosylated polypeptide 2,REVERSIBLY GLYCOSYLATED POLYPEPTIDE 2
A.thaliana TAIR10	AT5G51060 - A. THALIANA RESPIRATORY BURST OXIDASE HOMOLOG C,NADPH/respiratory burst oxidase protein D,RESPIRATORY BURST OXIDASE HOMOLOG C,ROOT HAIR DEFECTIVE 2
A.thaliana TAIR10	AT5G42500 - Disease resistance-responsive (dirigent-like protein) family protein
A.thaliana TAIR10	AT3G16830 - TOPLESS-related 2
A.thaliana TAIR10	AT5G16780 - DEFECTIVELY ORGANIZED TRIBUTARIES 2,MERISTEM-DEFECTIVE,SART-1 family
A.thaliana TAIR10	AT4G24750 - Rhodanese/Cell cycle control phosphatase superfamily protein
A.thaliana TAIR10	AT4G01790 - Ribosomal protein L7Ae/L30e/S12e/Gadd45 family protein
A.thaliana TAIR10	AT1G77080 - AGAMOUS-like 27,FLOWERING LOCUS M,K-box region and MADS-box transcription factor family protein,MADS AFFECTING FLOWERING 1
A.thaliana TAIR10	AT1G59850 - ARM repeat superfamily protein
A.thaliana TAIR10	AT5G37370 - PRP38 family protein
A.thaliana TAIR10	AT4G09320 - nucleoside diphosphate kinase 1,Nucleoside diphosphate kinase family protein
A.thaliana TAIR10	AT1G29490 - SAUR-like auxin-responsive protein family,SMALL AUXIN UPREGULATED 68
A.thaliana TAIR10	AT5G55070 - Dihydrolipoamide succinyltransferase
A.thaliana TAIR10	AT1G24030 - Protein kinase superfamily protein
A.thaliana TAIR10	AT4G31390 - ABC1-like kinase 1,ABC1-like kinase related to chlorophyll degradation and oxidative stress 1,Protein kinase superfamily protein,PROTON GRADIENT REGULATION 6
A.thaliana TAIR10	AT2G15080 - receptor like protein 19
A.thaliana TAIR10	AT2G26330 - ERECTA,Leucine-rich receptor-like protein kinase family protein,QUANTITATIVE RESISTANCE TO PLECTOSPHAERELLA 1
A.thaliana TAIR10	AT5G20830 - sucrose synthase 1
A.thaliana TAIR10	AT4G03190 - AUXIN SIGNALING F BOX PROTEIN 1,GRR1-like protein 1
A.thaliana TAIR10	AT3G21770 - Peroxidase superfamily protein
A.thaliana TAIR10	AT1G29460 - SAUR-like auxin-responsive protein family,SMALL AUXIN UPREGULATED RNA 65
A.thaliana TAIR10	AT1G58410 - Disease resistance protein (CC-NBS-LRR class) family
A.thaliana TAIR10	AT1G07530 - ARABIDOPSIS THALIANA GRAS (GAI, RGA, SCR) 2,GRAS (GAI, RGA, SCR) 2,SCARECROW-like 14
A.thaliana TAIR10	AT3G04720 - HEVEIN-LIKE,pathogenesis-related 4
A.thaliana TAIR10	AT2G05170 - vacuolar protein sorting 11
A.thaliana TAIR10	AT1G74410 - RING/U-box superfamily protein
A.thaliana TAIR10	AT3G20390 - endoribonuclease L-PSP family protein,Reactive Intermediate Deaminase A
A.thaliana TAIR10	AT1G64220 - translocase of outer membrane 7 kDa subunit 2
A.thaliana TAIR10	AT3G15630 - (1 of 2) PTHR34198:SF26 - (RAPE) HYPOTHETICAL PROTEIN
A.thaliana TAIR10	AT5G20990 - CHLORATE RESISTANT 6,CO-FACTOR FOR NITRATE REDUCTASE AND XANTHINE DEHYDROGENASE,CO-FACTOR FOR NITRATE REDUCTASE AND XANTHINE DEHYDROGENASE 1,molybdopterin biosynthesis CNX1 protein / molybdenum cofactor biosynthesis enzyme CNX1 (CNX1),SIRTINOL 4
A.thaliana TAIR10	AT5G64510 - tunicamycin induced 1
A.thaliana TAIR10	AT1G68630 - PLAC8 family protein
A.thaliana TAIR10	AT5G49030 - ovule abortion 2,tRNA synthetase class I (I, L, M and V) family protein
A.thaliana TAIR10	AT4G37770 - 1-amino-cyclopropane-1-carboxylate synthase 8
A.thaliana TAIR10	AT5G16280 - Tetratricopeptide repeat (TPR)-like superfamily protein
A.thaliana TAIR10	AT3G07480 - 2Fe-2S ferredoxin-like superfamily protein
A.thaliana TAIR10	AT2G05100 - LIGHT-HARVESTING CHLOROPHYLL B-BINDING 2,photosystem II light harvesting complex gene 2.1
A.thaliana TAIR10	AT4G19600 - Cyclin family protein
A.thaliana TAIR10	AT5G41360 - ARABIDOPSIS HOMOLOG OF XERODERMA PIGMENTOSUM COMPLEMENTATION GROUP B 2,homolog of Xeroderma pigmentosum complementation group B 2
A.thaliana TAIR10	AT3G27670 - ARM repeat superfamily protein,RESURRECTION1
A.thaliana TAIR10	AT3G19450 - CINNAMYL ALCOHOL DEHYDROGENASE 4,GroES-like zinc-binding alcohol dehydrogenase family protein
A.thaliana TAIR10	AT5G07810 - SNF2 domain-containing protein / helicase domain-containing protein / HNH endonuclease domain-containing protein
A.thaliana TAIR10	AT1G13910 - Leucine-rich repeat (LRR) family protein
A.thaliana TAIR10	AT1G19800 - ATP-binding cassette I14,trigalactosyldiacylglycerol 1
A.thaliana TAIR10	AT3G56090 - ferritin 3
A.thaliana TAIR10	AT4G19925 - Toll-Interleukin-Resistance (TIR) domain family protein
A.thaliana TAIR10	AT1G32240 - Homeodomain-like superfamily protein,KANADI 2
A.thaliana TAIR10	AT5G40010 - AAA-ATPase 1,ATPase-in-Seed-Development
A.thaliana TAIR10	AT1G48550 - Vacuolar protein sorting-associated protein 26
A.thaliana TAIR10	AT3G61250 - LATE MERISTEM IDENTITY2,myb domain protein 17
A.thaliana TAIR10	AT3G62420 - basic region/leucine zipper motif 53
A.thaliana TAIR10	AT1G34550 - EMBRYO DEFECTIVE 2756,Protein of unknown function (DUF616)
A.thaliana TAIR10	AT1G74520 - HVA22 homologue A
A.thaliana TAIR10	AT4G23470 - PLAC8 family protein
A.thaliana TAIR10	AT1G14530 - Protein of unknown function (DUF1084),TOM THREE HOMOLOG 1
A.thaliana TAIR10	AT1G50730 - (1 of 1) PTHR13673:SF0 - UPF0505 PROTEIN C16ORF62
A.thaliana TAIR10	AT1G06750 - P-loop containing nucleoside triphosphate hydrolases superfamily protein
A.thaliana TAIR10	AT3G53800 - Fes1B
A.thaliana TAIR10	AT5G04230 - phenyl alanine ammonia-lyase 3
A.thaliana TAIR10	AT5G19770 - tubulin alpha-3
A.thaliana TAIR10	AT1G56233 - Protein of unknown function (PD694200)
A.thaliana TAIR10	AT1G28240 - Protein of unknown function (DUF616)
A.thaliana TAIR10	AT5G24380 - YELLOW STRIPE like 2,YELLOW STRIPE LIKE 2
A.thaliana TAIR10	AT3G57010 - Calcium-dependent phosphotriesterase superfamily protein
A.thaliana TAIR10	AT1G79520 - Cation efflux family protein
A.thaliana TAIR10	AT1G66090 - Disease resistance protein (TIR-NBS class)
A.thaliana TAIR10	AT4G21860 - methionine sulfoxide reductase B 2
A.thaliana TAIR10	AT4G33000 - calcineurin B-like protein 10,SOS3-LIKE CALCIUM BINDING PROTEIN 8
A.thaliana TAIR10	AT2G17820 - histidine kinase 1
A.thaliana TAIR10	AT2G43010 - phytochrome interacting factor 4
A.thaliana TAIR10	AT1G15210 - ATP-binding cassette G35,pleiotropic drug resistance 7,PLEIOTROPIC DRUG RESISTANCE 7
A.thaliana TAIR10	AT2G34123 - Cysteine-rich protein
A.thaliana TAIR10	AT3G18460 - PLAC8 family protein
A.thaliana TAIR10	AT5G11110 - KAONASHI 2,SUCROSE PHOSPHATE SYNTHASE 1,sucrose phosphate synthase 2F,sucrose-phosphate synthase A2
A.thaliana TAIR10	AT3G16857 - response regulator 1
A.thaliana TAIR10	AT2G04240 - RING/U-box superfamily protein
A.thaliana TAIR10	AT2G46590 - DOF AFFECTING GERMINATION 2,Dof-type zinc finger DNA-binding family protein
A.thaliana TAIR10	AT5G08500 - Transmembrane CLPTM1 family protein
A.thaliana TAIR10	AT2G29960 - ARABIDOPSIS THALIANA CYCLOPHILIN 5,CYCLOPHILIN 19-4,cyclophilin 5
A.thaliana TAIR10	AT5G65870 - phytosulfokine 5 precursor
A.thaliana TAIR10	AT3G18190 - TCP-1/cpn60 chaperonin family protein
A.thaliana TAIR10	AT1G62740 - Hop2,stress-inducible protein, putative
A.thaliana TAIR10	AT3G51490 - tonoplast monosaccharide transporter3
A.thaliana TAIR10	AT2G42680 - ARABIDOPSIS THALIANA MULTIPROTEIN BRIDGING FACTOR 1A,multiprotein bridging factor 1A
A.thaliana TAIR10	AT2G39090 - anaphase-promoting complex 7,tetratricopeptide repeat (TPR)-containing protein
A.thaliana TAIR10	AT2G30870 - ARABIDOPSIS THALIANA GLUTATHIONE S-TRANSFERASE PHI 10,EARLY DEHYDRATION-INDUCED 13,glutathione S-transferase PHI 10
A.thaliana TAIR10	AT1G23010 - Cupredoxin superfamily protein,Low Phosphate Root1
A.thaliana TAIR10	AT3G60600 - VAMP/SYNAPTOBREVIN-ASSOCIATED PROTEIN 27-1,vesicle associated protein
A.thaliana TAIR10	AT3G12630 - A20/AN1-like zinc finger family protein,stress associated protein 5
A.thaliana TAIR10	AT5G47850 - CRINKLY4 related 4
A.thaliana TAIR10	AT1G77330 - 2-oxoglutarate (2OG) and Fe(II)-dependent oxygenase superfamily protein,ACC oxidase 5
A.thaliana TAIR10	AT4G30190 - H(+)-ATPase 2,PLASMA MEMBRANE PROTON ATPASE 2
A.thaliana TAIR10	AT1G01695 - Phosphatidylinositol N-acetyglucosaminlytransferase subunit P-related,TON1 Recruiting Motif 33
A.thaliana TAIR10	AT1G58807 - Disease resistance protein (CC-NBS-LRR class) family
A.thaliana TAIR10	AT2G04425 - low-molecular-weight cysteine-rich 82
A.thaliana TAIR10	AT4G34110 - ARABIDOPSIS POLY(A) BINDING 2,poly(A) binding protein 2,POLY(A) BINDING PROTEIN 2
A.thaliana TAIR10	AT3G11670 - DIGALACTOSYL DIACYLGLYCEROL DEFICIENT 1,UDP-Glycosyltransferase superfamily protein
A.thaliana TAIR10	AT1G51840 - protein kinase-related
A.thaliana TAIR10	AT2G27600 - AAA-type ATPase family protein,SUPPRESSOR OF K+ TRANSPORT GROWTH DEFECT1,VACUOLAR PROTEIN SORTING 4
A.thaliana TAIR10	AT3G14310 - OVERLY ZINC SENSITIVE 2,pectin methylesterase 3
A.thaliana TAIR10	AT5G51850 - TON1 Recruiting Motif 24
A.thaliana TAIR10	AT2G27660 - Cysteine/Histidine-rich C1 domain family protein
A.thaliana TAIR10	AT2G23460 - extra-large G-protein 1
A.thaliana TAIR10	AT1G26830 - cullin 3,cullin 3A
A.thaliana TAIR10	AT1G07620 - GTP-binding protein Obg/CgtA,TON1 Recruiting Motif 32
A.thaliana TAIR10	AT1G77490 - thylakoidal ascorbate peroxidase
A.thaliana TAIR10	AT4G15610 - CASP-like protein 1D1,Uncharacterised protein family (UPF0497)
A.thaliana TAIR10	AT3G56660 - basic region/leucine zipper motif protein 49
A.thaliana TAIR10	AT1G72200 - RING/U-box superfamily protein
A.thaliana TAIR10	AT3G11410 - ARABIDOPSIS THALIANA PROTEIN PHOSPHATASE 2CA,protein phosphatase 2CA
A.thaliana TAIR10	AT3G27730 - ATP binding;ATP-dependent helicases;DNA helicases,ROCK-N-ROLLERS
A.thaliana TAIR10	AT2G20270 - Thioredoxin superfamily protein
A.thaliana TAIR10	AT1G19660 - bifunctional nuclease in basal defense response 2,Wound-responsive family protein
A.thaliana TAIR10	AT2G45220 - pectin methylesterase 17,Plant invertase/pectin methylesterase inhibitor superfamily
A.thaliana TAIR10	AT3G27810 - ARABIDOPSIS THALIANA MYB DOMAIN PROTEIN 3,myb domain protein 21
A.thaliana TAIR10	AT2G22840 - growth-regulating factor 1
A.thaliana TAIR10	AT5G05690 - CABBAGE 3,CONSTITUTIVE PHOTOMORPHOGENIC DWARF,CYTOCHROME P450 90A1,Cytochrome P450 superfamily protein,DWARF 3
A.thaliana TAIR10	AT5G41370 - ARABIDOPSIS HOMOLOG OF XERODERMA PIGMENTOSUM COMPLEMENTATION GROUP B 1,homolog of xeroderma pigmentosum complementation group B 1
A.thaliana TAIR10	AT2G07020 - Protein kinase protein with adenine nucleotide alpha hydrolases-like domain
A.thaliana TAIR10	AT3G06850 - 2-oxoacid dehydrogenases acyltransferase family protein,DARK INDUCIBLE 3
A.thaliana TAIR10	AT1G06040 - B-box domain protein 24,B-box zinc finger family protein,SALT TOLERANCE
A.thaliana TAIR10	AT5G42810 - inositol-pentakisphosphate 2-kinase 1
A.thaliana TAIR10	AT2G28390 - MONENSIN SENSITIVITY1,SAND family protein
A.thaliana TAIR10	AT4G32760 - ENTH/VHS/GAT family protein
A.thaliana TAIR10	AT1G13990 - (1 of 42) IPR029045 - ClpP/crotonase-like domain
A.thaliana TAIR10	AT1G24851 - (1 of 6) IPR015327 - Smaug, pseudo-HEAT analogous topology
A.thaliana TAIR10	AT1G80450 - VQ motif-containing protein
A.thaliana TAIR10	AT5G63850 - amino acid permease 4
A.thaliana TAIR10	AT3G52590 - EARLY-RESPONSIVE TO DEHYDRATION 16,EMBRYO DEFECTIVE 2167,HAPLESS 4,ubiquitin extension protein 1
A.thaliana TAIR10	AT2G36430 - Plant protein of unknown function (DUF247)
A.thaliana TAIR10	AT5G54510 - Auxin-responsive GH3 family protein,DWARF IN LIGHT 1,Gretchen Hagen3.6
A.thaliana TAIR10	AT5G02030 - BEL1-LIKE HOMEODOMAIN 9,BELLRINGER,LARSON,PENNYWISE,POX (plant homeobox) family protein,REPLUMLESS,VAAMANA
A.thaliana TAIR10	AT1G17170 - Arabidopsis thaliana Glutathione S-transferase (class tau) 24,glutathione S-transferase TAU 24
A.thaliana TAIR10	AT4G25480 - C-REPEAT BINDING FACTOR 3,dehydration response element B1A
A.thaliana TAIR10	AT5G66020 - IMPAIRED IN BABA-INDUCED STERILITY 2,Phosphoinositide phosphatase family protein,SAC DOMAIN-CONTAINING PROTEIN 6,SUPPRESSOR OF ACTIN 1B
A.thaliana TAIR10	AT5G52100 - chlororespiration reduction 1,Dihydrodipicolinate reductase, bacterial/plant
A.thaliana TAIR10	AT4G24350 - Phosphorylase superfamily protein
A.thaliana TAIR10	AT5G55620 - (1 of 1) PTHR33513:SF21 - (RAPE) HYPOTHETICAL PROTEIN
A.thaliana TAIR10	AT3G54510 - Early-responsive to dehydration stress protein (ERD4)
A.thaliana TAIR10	AT3G58610 - ketol-acid reductoisomerase
A.thaliana TAIR10	AT3G06740 - GATA transcription factor 15
A.thaliana TAIR10	AT2G44080 - ARGOS-like
A.thaliana TAIR10	AT5G45800 - Leucine-rich repeat protein kinase family protein,maternal effect embryo arrest 62
A.thaliana TAIR10	AT1G08320 - bZIP transcription factor family protein,TGACG (TGA) motif-binding protein 9
A.thaliana TAIR10	AT1G74160 - TON1 Recruiting Motif 4
A.thaliana TAIR10	AT5G40840 - Rad21/Rec8-like family protein,Sister chromatid cohesion 1 (SCC1) protein homolog 2
A.thaliana TAIR10	AT5G51870 - AGAMOUS-like 71
A.thaliana TAIR10	AT1G73680 - alpha dioxygenase,alpha-dioxygenase 2
A.thaliana TAIR10	AT4G04500 - cysteine-rich RLK (RECEPTOR-like protein kinase) 37
A.thaliana TAIR10	AT5G49190 - sucrose synthase 2,SUCROSE SYNTHASE FROM ARABIDOPSIS
A.thaliana TAIR10	AT5G57490 - ARABIDOPSIS THALIANA VOLTAGE DEPENDENT ANION CHANNEL 4,voltage dependent anion channel 4
A.thaliana TAIR10	AT2G21060 - COLD SHOCK DOMAIN PROTEIN 4,glycine-rich protein 2B
A.thaliana TAIR10	AT1G71030 - ARABIDOPSIS MYB-LIKE 2,MYB-like 2
A.thaliana TAIR10	AT5G24280 - gamma-irradiation and mitomycin c induced 1,GAMMA-IRRADIATION AND MITOMYCIN C INDUCED 1
A.thaliana TAIR10	AT4G08920 - BLUE LIGHT UNINHIBITED 1,cryptochrome 1,ELONGATED HYPOCOTYL 4,OUT OF PHASE 2
A.thaliana TAIR10	AT2G47710 - Adenine nucleotide alpha hydrolases-like superfamily protein
A.thaliana TAIR10	AT4G22530 - S-adenosyl-L-methionine-dependent methyltransferases superfamily protein
A.thaliana TAIR10	AT3G01450 - ARM repeat superfamily protein
A.thaliana TAIR10	AT4G01470 - tonoplast intrinsic protein 1;3
A.thaliana TAIR10	AT1G68990 - male gametophyte defective 3
A.thaliana TAIR10	AT3G17820 - ARABIDOPSIS THALIANA GLUTAMINE SYNTHASE CLONE KB6,glutamine synthetase 1.3,GLUTAMINE SYNTHETASE 1;3
A.thaliana TAIR10	AT1G70530 - cysteine-rich RLK (RECEPTOR-like protein kinase) 3
A.thaliana TAIR10	AT1G26945 - basic helix-loop-helix (bHLH) DNA-binding superfamily protein,KIDARI,PACLOBUTRAZOL RESISTANCE 6
A.thaliana TAIR10	AT5G13820 - H-PROTEIN PROMOTE,telomeric DNA binding protein 1
A.thaliana TAIR10	AT5G20300 - Avirulence induced gene (AIG1) family protein,translocon at the outer envelope membrane of chloroplasts 90
A.thaliana TAIR10	AT1G55920 - SERINE ACETYLTRANSFERASE 1,serine acetyltransferase 2;1,SERINE ACETYLTRANSFERASE 5
A.thaliana TAIR10	AT1G11000 - MILDEW RESISTANCE LOCUS O 4,Seven transmembrane MLO family protein
A.thaliana TAIR10	AT5G01650 - Tautomerase/MIF superfamily protein
A.thaliana TAIR10	AT5G18150 - Methyltransferase-related protein
A.thaliana TAIR10	AT2G45030 - Translation elongation factor EFG/EF2 protein
A.thaliana TAIR10	AT4G01800 - Albino or Glassy Yellow 1,Arabidopsis thaliana chloroplast SecA
A.thaliana TAIR10	AT4G14110 - CONSTITUTIVE PHOTOMORPHOGENIC 9,COP9 SIGNALOSOME SUBUNIT 8,COP9 signalosome, subunit CSN8,EMBRYO DEFECTIVE 143,FUSCA 7
A.thaliana TAIR10	AT3G53700 - maternal effect embryo arrest 40,Pentatricopeptide repeat (PPR) superfamily protein
A.thaliana TAIR10	AT2G35690 - acyl-CoA oxidase 5
A.thaliana TAIR10	AT5G63270 - RPM1-interacting protein 4 (RIN4) family protein
A.thaliana TAIR10	AT4G31870 - glutathione peroxidase 7,GLUTATHIONE PEROXIDASE 7
A.thaliana TAIR10	AT5G04280 - AtRZ-1c,RNA-binding glycine-rich protein B3,RNA-binding (RRM/RBD/RNP motifs) family protein with retrovirus zinc finger-like domain,RZ-1c
A.thaliana TAIR10	AT5G43320 - casein kinase I-like 8
A.thaliana TAIR10	AT1G06550 - ATP-dependent caseinolytic (Clp) protease/crotonase family protein
A.thaliana TAIR10	AT4G11030 - AMP-dependent synthetase and ligase family protein,Long-Chain Acyl-Coenzyme A Synthetase 5
A.thaliana TAIR10	AT5G48940 - Leucine-rich repeat transmembrane protein kinase family protein,RGF1 INSENSITIVE 2
A.thaliana TAIR10	AT2G46440 - cyclic nucleotide-gated channel 11,CYCLIC NUCLEOTIDE-GATED CHANNEL 11,cyclic nucleotide-gated channels
A.thaliana TAIR10	AT5G49700 - AT-hook motif nuclear localized protein 17,Predicted AT-hook DNA-binding family protein
A.thaliana TAIR10	AT2G33860 - AUXIN RESPONSE TRANSCRIPTION FACTOR 3,ETTIN,Transcriptional factor B3 family protein / auxin-responsive factor AUX/IAA-related
A.thaliana TAIR10	AT3G02885 - GAST1 protein homolog 5
A.thaliana TAIR10	AT1G72520 - Arabidopsis thaliana lipoxygenase 4,lipoxygenase 4,PLAT/LH2 domain-containing lipoxygenase family protein
A.thaliana TAIR10	AT2G42580 - tetratricopetide-repeat thioredoxin-like 3,VHI-INTERACTING TPR CONTAINING PROTEIN
A.thaliana TAIR10	AT5G16970 - alkenal reductase
A.thaliana TAIR10	AT1G09340 - chloroplast RNA binding,CHLOROPLAST STEM-LOOP BINDING PROTEIN OF 41 KDA,heteroglycan-interacting protein 1.3
A.thaliana TAIR10	AT2G47860 - Phototropic-responsive NPH3 family protein
A.thaliana TAIR10	AT1G32530 - RING/U-box superfamily protein
A.thaliana TAIR10	AT1G07520 - GRAS family transcription factor
A.thaliana TAIR10	AT3G55460 - SC35-like splicing factor 30
A.thaliana TAIR10	AT2G20010 - Protein of unknown function (DUF810)
A.thaliana TAIR10	AT5G40420 - oleosin 2,OLEOSIN 2
A.thaliana TAIR10	AT5G52640 - HEAT SHOCK PROTEIN 81-1,HEAT SHOCK PROTEIN 83,heat shock protein 90.1,HEAT SHOCK PROTEIN 90-1
A.thaliana TAIR10	AT3G06810 - acyl-CoA dehydrogenase-related,IBA-RESPONSE 3
A.thaliana TAIR10	AT2G01500 - HIGH EXPRESSION OF OSMOTICALLY RESPONSIVE GENE 9,Homeodomain-like superfamily protein,PRETTY FEW SEEDS 2,WUSCHEL RELATED HOMEOBOX 6
A.thaliana TAIR10	AT1G01250 - Integrase-type DNA-binding superfamily protein
A.thaliana TAIR10	AT5G17680 - disease resistance protein (TIR-NBS-LRR class), putative
A.thaliana TAIR10	AT2G32400 - GLUTAMATE RECEPTOR 3.7,glutamate receptor 5
A.thaliana TAIR10	AT3G57000 - nucleolar essential protein-related
A.thaliana TAIR10	AT2G14100 - \"cytochrome P450, family 705, subfamily A, polypeptide 13\,cytochrome P450, family 705, subfamily A, polypeptide 13
A.thaliana TAIR10	AT5G08640 - FLAGELLIN-SENSITIVE 1,FLAVONOL SYNTHASE,flavonol synthase 1
A.thaliana TAIR10	AT5G51600 - ARABIDOPSIS THALIANA MICROTUBULE-ASSOCIATED PROTEIN 65-3,MICROTUBULE-ASSOCIATED PROTEIN 65-3,Microtubule associated protein (MAP65/ASE1) family protein,PLEIADE
A.thaliana TAIR10	AT1G35210 - (1 of 1) PTHR34046:SF7 - OS02G0758200 PROTEIN
A.thaliana TAIR10	AT3G48640
A.thaliana TAIR10	AT4G17070 - peptidyl-prolyl cis-trans isomerases
A.thaliana TAIR10	AT5G35550 - Duplicated homeodomain-like superfamily protein,MYB DOMAIN PROTEIN 123,TRANSPARENT TESTA 2
A.thaliana TAIR10	AT1G72860 - Disease resistance protein (TIR-NBS-LRR class) family
A.thaliana TAIR10	AT1G75540 - B BOX 21,B-box domain protein 21,long hypocotyl under shade,salt tolerance homolog2
A.thaliana TAIR10	AT3G14050 - RELA/SPOT homolog 2,RELA-SPOT HOMOLOG 2,RELA/SPOT HOMOLOG 2
A.thaliana TAIR10	AT3G15870 - Fatty acid desaturase family protein
A.thaliana TAIR10	AT2G39670 - Radical SAM superfamily protein
A.thaliana TAIR10	AT2G42600 - phosphoenolpyruvate carboxylase 2
A.thaliana TAIR10	AT3G19370 - Plant protein of unknown function (DUF869)
A.thaliana TAIR10	AT1G02340 - basic helix-loop-helix (bHLH) DNA-binding superfamily protein,LONG HYPOCOTYL IN FAR-RED,REDUCED PHYTOCHROME SIGNALING 1,REDUCED SENSITIVITY TO FAR-RED LIGHT 1
A.thaliana TAIR10	AT5G06760 - Late Embryogenesis Abundant 4-5
A.thaliana TAIR10	AT5G10250 - DEFECTIVELY ORGANIZED TRIBUTARIES 3,Phototropic-responsive NPH3 family protein
A.thaliana TAIR10	AT5G04150 - basic helix-loop-helix (bHLH) DNA-binding superfamily protein
A.thaliana TAIR10	AT3G33520 - actin-related protein 6,EARLY IN SHORT DAYS 1,SUPPRESSOR OF FRI 3
A.thaliana TAIR10	AT1G76690 - 12-oxophytodienoate reductase 2,ARABIDOPSIS 12-OXOPHYTODIENOATE REDUCTASE 2
A.thaliana TAIR10	AT3G63360 - defensin-related
A.thaliana TAIR10	AT2G25940 - alpha-vacuolar processing enzyme
A.thaliana TAIR10	AT3G13660 - Disease resistance-responsive (dirigent-like protein) family protein
A.thaliana TAIR10	AT4G37460 - SUPPRESSOR OF RPS4-RLD 1,Tetratricopeptide repeat (TPR)-like superfamily protein
A.thaliana TAIR10	AT3G49530 - NAC domain containing protein 62,NTM1 (NAC WITH TRANSMEMBRANE MOTIF 1)-LIKE 6
A.thaliana TAIR10	AT4G23690 - Arabidopsis thaliana dirigent protein 6,dirigent protein 6,Disease resistance-responsive (dirigent-like protein) family protein
A.thaliana TAIR10	AT1G62260 - mitochondrial editing factor 9
A.thaliana TAIR10	AT2G01980 - ARABIDOPSIS NA+/H+ ANTIPORTER 7,ARABIDOPSIS SALT OVERLY SENSITIVE 1,SALT OVERLY SENSITIVE 1,sodium proton exchanger, putative (NHX7) (SOS1)
A.thaliana TAIR10	AT3G28860 - Arabidopsis thaliana ATP-binding cassette B19,ATP-binding cassette B19,ATP binding cassette subfamily B19,MULTIDRUG RESISTANCE PROTEIN 11,P-GLYCOPROTEIN 19
A.thaliana TAIR10	AT1G55870 - ABA-HYPERSENSITIVE GERMINATION 2,ARABIDOPSIS THALIANA POLY(A) RIBONUCLEASE,Polynucleotidyl transferase, ribonuclease H-like superfamily protein
A.thaliana TAIR10	AT3G19590 - BUB (BUDDING UNINHIBITED BY BENZYMIDAZOL) 3.1,Transducin/WD40 repeat-like superfamily protein
A.thaliana TAIR10	AT1G17810 - beta-tonoplast intrinsic protein
A.thaliana TAIR10	AT4G04740 - calcium-dependent protein kinase 23
A.thaliana TAIR10	AT3G03550 - RING/U-box superfamily protein
A.thaliana TAIR10	AT2G29940 - ATP-binding cassette G31,pleiotropic drug resistance 3,PLEIOTROPIC DRUG RESISTANCE 3
A.thaliana TAIR10	AT5G17890 - CHILLING SENSITIVE 3,DA1-related protein 4
A.thaliana TAIR10	AT5G57660 - B-box domain protein 6,CONSTANS-like 5
A.thaliana TAIR10	AT4G30400 - RING/U-box superfamily protein
A.thaliana TAIR10	AT4G14160 - Sec23/Sec24 protein transport family protein
A.thaliana TAIR10	AT5G28540 - heat shock protein 70 (Hsp 70) family protein
A.thaliana TAIR10	AT1G02150 - Tetratricopeptide repeat (TPR)-like superfamily protein
A.thaliana TAIR10	AT5G57150 - basic helix-loop-helix (bHLH) DNA-binding superfamily protein
A.thaliana TAIR10	AT1G09760 - U2 small nuclear ribonucleoprotein A
A.thaliana TAIR10	AT5G03540 - exocyst subunit exo70 family protein A1
A.thaliana TAIR10	AT3G28480 - Oxoglutarate/iron-dependent oxygenase
A.thaliana TAIR10	AT1G47570 - RING/U-box superfamily protein
A.thaliana TAIR10	AT4G04890 - protodermal factor 2
A.thaliana TAIR10	AT3G08670
A.thaliana TAIR10	AT5G57420 - indole-3-acetic acid inducible 33
A.thaliana TAIR10	AT5G45890 - senescence-associated gene 12
A.thaliana TAIR10	AT4G33910 - 2-oxoglutarate (2OG) and Fe(II)-dependent oxygenase superfamily protein
A.thaliana TAIR10	AT1G64350 - Transducin/WD40 repeat-like superfamily protein
A.thaliana TAIR10	AT3G50260 - cooperatively regulated by ethylene and jasmonate 1,DREB AND EAR MOTIF PROTEIN 1
A.thaliana TAIR10	AT5G43780 - Pseudouridine synthase/archaeosine transglycosylase-like family protein
A.thaliana TAIR10	AT3G15720 - Pectin lyase-like superfamily protein
A.thaliana TAIR10	AT1G08980 - amidase 1,AMIDASE-LIKE PROTEIN 1,ARABIDOPSIS THALIANA TRANSLOCON AT THE OUTER MEMBRANE OF CHLOROPLASTS 64-I,TRANSLOCON AT THE OUTER MEMBRANE OF CHLOROPLASTS 64-I
A.thaliana TAIR10	AT2G34500 - cytochrome P450, family 710, subfamily A, polypeptide 1
A.thaliana TAIR10	AT5G54170 - Polyketide cyclase/dehydrase and lipid transport superfamily protein
A.thaliana TAIR10	AT3G13320 - cation exchanger 2
A.thaliana TAIR10	AT2G26400 - ACIREDUCTONE DIOXYGENASE,acireductone dioxygenase 3
A.thaliana TAIR10	AT4G23800 - 3xHigh Mobility Group-box2,HMG (high mobility group) box protein
A.thaliana TAIR10	AT3G63130 - RAN GTPase activating protein 1,RAN GTPASE-ACTIVATING PROTEIN 1
A.thaliana TAIR10	AT4G09310 - SPla/RYanodine receptor (SPRY) domain-containing protein
A.thaliana TAIR10	AT5G59880 - actin depolymerizing factor 3
A.thaliana TAIR10	AT1G44120 - Armadillo/beta-catenin-like repeat ; C2 calcium/lipid-binding domain (CaLB) protein,CELLULOSE SYNTHASE INTERACTIVE 2
A.thaliana TAIR10	AT3G24170 - glutathione-disulfide reductase
A.thaliana TAIR10	AT2G02760 - ubiquitin-conjugating enzyme 2,ubiquiting-conjugating enzyme 2
A.thaliana TAIR10	AT5G44870 - Disease resistance protein (TIR-NBS-LRR class) family,LAZARUS 5,tolerance to Tobacco ringspot virus 1
A.thaliana TAIR10	AT2G02850 - plantacyanin
A.thaliana TAIR10	AT2G37770 - Aldo-keto reductase family 4 member C9,Chloroplastic aldo-keto reductase,NAD(P)-linked oxidoreductase superfamily protein
A.thaliana TAIR10	AT5G24540 - beta glucosidase 31
A.thaliana TAIR10	AT4G37680 - heptahelical protein 4
A.thaliana TAIR10	AT2G23270 - (1 of 1) PTHR34663:SF9 - OS06G0637400 PROTEIN
A.thaliana TAIR10	AT1G32900 - granule bound starch synthase 1,UDP-Glycosyltransferase superfamily protein
A.thaliana TAIR10	AT1G69600 - ARABIDOPSIS THALIANA HOMEOBOX PROTEIN 29,zinc finger homeodomain 1,ZINC FINGER HOMEODOMAIN 11
A.thaliana TAIR10	AT5G63780 - RING/FYVE/PHD zinc finger superfamily protein,shoot apical meristem arrest 1
A.thaliana TAIR10	AT2G44800 - 2-oxoglutarate (2OG) and Fe(II)-dependent oxygenase superfamily protein
A.thaliana TAIR10	AT5G61030 - glycine-rich RNA-binding protein 3,RNA-binding glycine-rich protein A7
A.thaliana TAIR10	AT1G60090 - beta glucosidase 4
A.thaliana TAIR10	AT4G26910 - Dihydrolipoamide succinyltransferase
A.thaliana TAIR10	AT3G62840 - Small nuclear ribonucleoprotein family protein
A.thaliana TAIR10	AT4G39640 - gamma-glutamyl transpeptidase 1
A.thaliana TAIR10	AT5G23450 - long-chain base (LCB) kinase 1
A.thaliana TAIR10	AT3G13920 - eukaryotic translation initiation factor 4A1
A.thaliana TAIR10	AT5G11060 - KNOTTED1-like homeobox gene 4
A.thaliana TAIR10	AT4G14440 - 3-hydroxyacyl-CoA dehydratase 1,ARABIDOPSIS THALIANA DELTA(3), DELTA(2)-ENOYL COA ISOMERASE 3,DELTA(3), DELTA(2)-ENOYL COA ISOMERASE 3
A.thaliana TAIR10	AT3G20340 - (1 of 54) IPR008978 - HSP20-like chaperone
A.thaliana TAIR10	AT1G51820 - Leucine-rich repeat protein kinase family protein
A.thaliana TAIR10	AT4G02270 - root hair specific 13,SEED AND ROOT HAIR PROTECTIVE PROTEIN
A.thaliana TAIR10	AT4G14570 - acylamino acid-releasing enzyme,acylaminoacyl-peptidase-related
A.thaliana TAIR10	AT5G17290 - AUTOPHAGY 5,autophagy protein Apg5 family
A.thaliana TAIR10	AT1G33110 - MATE efflux family protein
A.thaliana TAIR10	AT1G68880 - basic leucine-zipper 8
A.thaliana TAIR10	AT4G03520 - thioredoxin m2,Thioredoxin superfamily protein
A.thaliana TAIR10	AT1G57550 - Low temperature and salt responsive protein family
A.thaliana TAIR10	AT3G49580 - response to low sulfur 1,RESPONSE TO LOW SULFUR 1
A.thaliana TAIR10	AT5G67590 - FROSTBITE1,NADH:ubiquinone oxidoreductase Fe-S protein4,NADH-ubiquinone oxidoreductase-related
A.thaliana TAIR10	AT5G01230 - S-adenosyl-L-methionine-dependent methyltransferases superfamily protein,UPPRESSOR OF CSB3 9
A.thaliana TAIR10	AT3G10640 - SNF7 family protein
A.thaliana TAIR10	AT5G13450 - delta subunit of Mt ATP synthase
A.thaliana TAIR10	AT2G01340 - (1 of 28) PF14009 - PADRE domain (PADRE)
A.thaliana TAIR10	AT1G16760 - Protein kinase protein with adenine nucleotide alpha hydrolases-like domain
A.thaliana TAIR10	AT1G18620 - TON1 Recruiting Motif 3
A.thaliana TAIR10	AT2G28900 - outer envelope protein 16,outer plastid envelope protein 16-1,OUTER PLASTID ENVELOPE PROTEIN 16-L
A.thaliana TAIR10	AT5G30510 - plastid ribosomal protein S1,ribosomal protein S1
A.thaliana TAIR10	AT3G05710 - syntaxin of plants 43
A.thaliana TAIR10	AT1G33750 - Terpene Synthase 22,Terpenoid cyclases/Protein prenyltransferases superfamily protein
A.thaliana TAIR10	AT5G44790 - copper-exporting ATPase / responsive-to-antagonist 1 / copper-transporting ATPase (RAN1),RESPONSIVE-TO-ANTAGONIST 1
A.thaliana TAIR10	AT4G15850 - RNA helicase 1
A.thaliana TAIR10	AT3G30842 - ATP-binding cassette G38,pleiotropic drug resistance 10
A.thaliana TAIR10	AT3G57020 - Calcium-dependent phosphotriesterase superfamily protein
A.thaliana TAIR10	AT3G54660 - glutathione reductase
A.thaliana TAIR10	AT1G05880 - ARABIDOPSIS ARIADNE 12,ARIADNE 12,RING/U-box superfamily protein
A.thaliana TAIR10	AT1G17600 - Disease resistance protein (TIR-NBS-LRR class) family
A.thaliana TAIR10	AT1G27170 - transmembrane receptors;ATP binding
A.thaliana TAIR10	AT1G23710 - Protein of unknown function (DUF1645)
A.thaliana TAIR10	AT2G39460 - ARABIDOPSIS THALIANA RIBOSOMAL PROTEIN L23A,RIBOSOMAL PROTEIN L23A,RIBOSOMAL PROTEIN L23A1,ribosomal protein L23AA
A.thaliana TAIR10	AT3G20210 - delta vacuolar processing enzyme,DELTA VACUOLAR PROCESSING ENZYME
A.thaliana TAIR10	AT4G26090 - NB-ARC domain-containing disease resistance protein,RESISTANT TO P. SYRINGAE 2
A.thaliana TAIR10	AT5G05140 - Transcription elongation factor (TFIIS) family protein
A.thaliana TAIR10	AT2G26690 - Major facilitator superfamily protein,NRT1/ PTR family 6.2
A.thaliana TAIR10	AT1G51160 - SNARE-like superfamily protein
A.thaliana TAIR10	AT2G43535 - Scorpion toxin-like knottin superfamily protein
A.thaliana TAIR10	AT1G14200 - RING/U-box superfamily protein
A.thaliana TAIR10	AT2G36290 - alpha/beta-Hydrolases superfamily protein
A.thaliana TAIR10	AT1G22900 - Disease resistance-responsive (dirigent-like protein) family protein
A.thaliana TAIR10	AT2G04400 - Aldolase-type TIM barrel family protein
A.thaliana TAIR10	AT1G15420 - LANT-SPECIFIC COMPONENT OF THE PRE- rRNA PROCESSING COMPLEX1
A.thaliana TAIR10	AT2G24850 - TYROSINE AMINOTRANSFERASE,tyrosine aminotransferase 3
A.thaliana TAIR10	AT1G25550 - HRS1 HOMOLOG3,myb-like transcription factor family protein
A.thaliana TAIR10	AT4G02110 - transcription coactivators
A.thaliana TAIR10	AT3G63410 - ALBINO OR PALE GREEN MUTANT 1,INNER ENVELOPE PROTEIN 37,S-adenosyl-L-methionine-dependent methyltransferases superfamily protein,VITAMIN E DEFECTIVE 3
A.thaliana TAIR10	AT4G21320 - Aldolase-type TIM barrel family protein,HEAT-STRESS-ASSOCIATED 32
A.thaliana TAIR10	AT5G03780 - TRF-like 10
A.thaliana TAIR10	AT5G53000 - 2A phosphatase associated protein of 46 kD
A.thaliana TAIR10	AT5G37400 - Family of unknown function (DUF577)
A.thaliana TAIR10	AT4G21150 - HAPLESS 6,RIBOPHORIN II,ribophorin II (RPN2) family protein
A.thaliana TAIR10	AT4G08850 - Leucine-rich repeat receptor-like protein kinase family protein,MDIS1-INTERACTING RECEPTOR LIKE KINASE2
A.thaliana TAIR10	AT2G29490 - GLUTATHIONE S-TRANSFERASE 19,glutathione S-transferase TAU 1
A.thaliana TAIR10	AT4G33560 - Wound-responsive family protein
A.thaliana TAIR10	AT5G14130 - Peroxidase superfamily protein
A.thaliana TAIR10	AT1G09100 - 26S proteasome AAA-ATPase subunit RPT5B
A.thaliana TAIR10	AT1G43640 - tubby like protein 5
A.thaliana TAIR10	AT1G04100 - indoleacetic acid-induced protein 10
A.thaliana TAIR10	AT2G44180 - methionine aminopeptidase 2A
A.thaliana TAIR10	AT1G54770 - Fcf2 pre-rRNA processing protein
A.thaliana TAIR10	AT4G31800 - ARABIDOPSIS THALIANA WRKY DNA-BINDING PROTEIN 18,WRKY DNA-binding protein 18
A.thaliana TAIR10	AT4G00080 - Plant invertase/pectin methylesterase inhibitor superfamily protein,unfertilized embryo sac 11
A.thaliana TAIR10	AT1G52740 - histone H2A protein 9
A.thaliana TAIR10	AT4G25320 - AT hook motif DNA-binding family protein,AT-HOOK MOTIF NUCLEAR LOCALIZED PROTEIN 3
A.thaliana TAIR10	AT1G68090 - annexin 5,ANNEXIN ARABIDOPSIS THALIANA 5
A.thaliana TAIR10	AT5G54200 - Transducin/WD40 repeat-like superfamily protein,WD40-DOMAIN 1
A.thaliana TAIR10	AT3G20780 - BRASSINOSTEROID INSENSITIVE 3,ELONGATED HYPOCOTYL 6,HARLEQUIN,ROOT HAIRLESS 3,topoisomerase 6 subunit B
A.thaliana TAIR10	AT4G39940 - ADENOSINE-5'-PHOSPHOSULFATE (APS) KINASE 2,APS-kinase 2
A.thaliana TAIR10	AT4G02380 - Arabidopsis thaliana late embryogenensis abundant like 5,senescence-associated gene 21
A.thaliana TAIR10	AT1G79880 - La protein 2,RNA recognition motif (RRM)-containing protein
A.thaliana TAIR10	AT5G19220 - ADP GLUCOSE PYROPHOSPHORYLASE 2,ADP glucose pyrophosphorylase large subunit 1
A.thaliana TAIR10	AT5G61790 - calnexin 1
A.thaliana TAIR10	AT5G58610 - PHD finger transcription factor, putative
A.thaliana TAIR10	AT1G23880 - NHL domain-containing protein
A.thaliana TAIR10	AT5G51630 - Disease resistance protein (TIR-NBS-LRR class) family
A.thaliana TAIR10	AT1G51700 - DOF zinc finger protein 1
A.thaliana TAIR10	AT1G79670 - RESISTANCE TO FUSARIUM OXYSPORUM 1,Wall-associated kinase family protein
A.thaliana TAIR10	AT2G43910 - HARMLESS TO OZONE LAYER 1
A.thaliana TAIR10	AT5G05320 - FAD/NAD(P)-binding oxidoreductase family protein
A.thaliana TAIR10	AT1G71692 - AGAMOUS-like 12,XAANTAL1
A.thaliana TAIR10	AT2G30080 - ZIP metal ion transporter family
A.thaliana TAIR10	AT1G06090 - Fatty acid desaturase family protein
A.thaliana TAIR10	AT5G58620 - tandem zinc finger protein 9,zinc finger (CCCH-type) family protein
A.thaliana TAIR10	AT3G56940 - COPPER RESPONSE DEFECT 1,dicarboxylate diiron protein, putative (Crd1)
A.thaliana TAIR10	AT4G01120 - BASIC REGION/LEUCINE ZIPPER MOTIF 5,G-box binding factor 2
A.thaliana TAIR10	AT3G17609 - HY5-homolog
A.thaliana TAIR10	AT5G64000 - Inositol monophosphatase family protein
A.thaliana TAIR10	AT1G51660 - ARABIDOPSIS THALIANA MITOGEN-ACTIVATED PROTEIN KINASE KINASE 4,mitogen-activated protein kinase kinase 4
A.thaliana TAIR10	AT1G19320 - Pathogenesis-related thaumatin superfamily protein
A.thaliana TAIR10	AT4G26400 - RING/U-box superfamily protein
A.thaliana TAIR10	AT3G59320 - Eukaryotic protein of unknown function (DUF914)
A.thaliana TAIR10	AT5G48880 - 3-KETO-ACYL-COENZYME A THIOLASE 5,PEROXISOMAL-3-KETO-ACYL-COA THIOLASE 1,peroxisomal 3-keto-acyl-CoA thiolase 2
A.thaliana TAIR10	AT5G22010 - replication factor C 1,replication factor C1
A.thaliana TAIR10	AT1G54470 - resistance to Peronospora parasitica 27,RNI-like superfamily protein
A.thaliana TAIR10	AT2G18250 - 4-phosphopantetheine adenylyltransferase
A.thaliana TAIR10	AT4G11150 - embryo defective 2448,vacuolar ATP synthase subunit E1
A.thaliana TAIR10	AT5G19280 - kinase associated protein phosphatase,ROOT ATTENUATED GROWTH 1
A.thaliana TAIR10	AT5G47100 - calcineurin B-like protein 9
A.thaliana TAIR10	AT2G33460 - ROP-interactive CRIB motif-containing protein 1
A.thaliana TAIR10	AT4G16110 - response regulator 2
A.thaliana TAIR10	AT2G47390 - Prolyl oligopeptidase family protein
A.thaliana TAIR10	AT4G27060 - ARM repeat superfamily protein,CONVOLUTA,SPIRAL 2,TORTIFOLIA 1
A.thaliana TAIR10	AT1G32330 - heat shock transcription factor A1D
A.thaliana TAIR10	AT4G16780 - ARABIDOPSIS THALIANA HOMEOBOX PROTEIN 2,homeobox protein 2
A.thaliana TAIR10	AT2G21390 - Coatomer, alpha subunit
A.thaliana TAIR10	AT2G23770 - LysM-containing receptor-like kinase 4,protein kinase family protein / peptidoglycan-binding LysM domain-containing protein
A.thaliana TAIR10	AT1G06770 - DREB2A-interacting protein 1
A.thaliana TAIR10	AT1G26350 - (1 of 3) IPR013824 - DNA topoisomerase, type IA, central region, subdomain 1
A.thaliana TAIR10	AT4G34590 - Arabidopsis thaliana basic leucine-zipper 11,G-box binding factor 6
A.thaliana TAIR10	AT2G22941 - Defensin-like (DEFL) family protein
A.thaliana TAIR10	AT3G08550 - ABA INSENSITIVE 8,ELONGATION DEFECTIVE 1,elongation defective 1 protein / ELD1 protein,KOBITO
A.thaliana TAIR10	AT2G33810 - squamosa promoter binding protein-like 3
A.thaliana TAIR10	AT4G31720 - SALT TOLERANCE DURING GERMINATION 1,TBP-ASSOCIATED FACTOR 10,TBP-associated factor II 15
A.thaliana TAIR10	AT5G22250 - CCR4- associated factor 1b,Polynucleotidyl transferase, ribonuclease H-like superfamily protein
A.thaliana TAIR10	AT5G19380 - CRT (chloroquine-resistance transporter)-like transporter 1
A.thaliana TAIR10	AT4G23600 - CORONATINE INDUCED 1,JASMONIC ACID RESPONSIVE 2,Tyrosine transaminase family protein
A.thaliana TAIR10	AT1G25520 - Uncharacterized protein family (UPF0016)
A.thaliana TAIR10	AT5G03720 - ARABIDOPSIS THALIANA HEAT SHOCK TRANSCRIPTION FACTOR A3,heat shock transcription factor A3
A.thaliana TAIR10	AT5G47370 - Homeobox-leucine zipper protein 4 (HB-4) / HD-ZIP protein
A.thaliana TAIR10	AT5G04110 - DNA GYRASE B3
A.thaliana TAIR10	AT3G58730 - vacuolar ATP synthase subunit D (VATD) / V-ATPase D subunit / vacuolar proton pump D subunit (VATPD)
A.thaliana TAIR10	AT5G60410 - DNA-binding protein with MIZ/SP-RING zinc finger, PHD-finger and SAP domain
A.thaliana TAIR10	AT3G08947 - ARM repeat superfamily protein
A.thaliana TAIR10	AT5G47200 - ARABIDOPSIS RAB GTPASE HOMOLOG D2B,RAB GTPase homolog 1A
A.thaliana TAIR10	AT2G30580 - DREB2A-interacting protein 2
A.thaliana TAIR10	AT5G39740 - OLIGOCELLULA 7,ribosomal protein L5 B
A.thaliana TAIR10	AT3G57610 - adenylosuccinate synthase
A.thaliana TAIR10	AT3G63490 - EMBRYO DEFECTIVE 3126,plastid ribosomal protein L1,Ribosomal protein L1p/L10e family
A.thaliana TAIR10	AT4G10710 - global transcription factor C
A.thaliana TAIR10	AT4G18040 - ARABIDOPSIS THALIANA EUKARYOTIC TRANSLATION INITATION FACTOR 4E1,CUCUMOVIRUS MULTIPLICATION 1,eukaryotic translation initiation factor 4E,eukaryotic translation Initiation Factor 4E1
A.thaliana TAIR10	AT5G25540 - CTC-interacting domain 6
A.thaliana TAIR10	AT2G38530 - cell growth defect factor-3,lipid transfer protein 2
A.thaliana TAIR10	AT3G10680 - HSP20-like chaperones superfamily protein
A.thaliana TAIR10	AT5G48485 - Bifunctional inhibitor/lipid-transfer protein/seed storage 2S albumin superfamily protein,DEFECTIVE IN INDUCED RESISTANCE 1
A.thaliana TAIR10	AT2G42260 - POLYCHOME,uv-b-insensitive 4,UV-B-INSENSITIVE 4
A.thaliana TAIR10	AT4G11380 - Adaptin family protein
A.thaliana TAIR10	AT2G12940 - Basic-leucine zipper (bZIP) transcription factor family protein,unfertilized embryo sac 4
A.thaliana TAIR10	AT1G01470 - Arabidopsis thaliana Late Embryogenesis abundant 14,LATE EMBRYOGENESIS ABUNDANT 14,Late embryogenesis abundant protein,LIGHT STRESS-REGULATED 3
A.thaliana TAIR10	AT1G28490 - syntaxin of plants 61
A.thaliana TAIR10	AT4G22980 - (1 of 1) PTHR14237:SF64 - MOLYBDENUM COFACTOR SULFURASE-LIKE PROTEIN
A.thaliana TAIR10	AT5G58270 - ABC transporter of the mitochondrion 3,ARABIDOPSIS THALIANA ABC TRANSPORTER OF THE MITOCHONDRION 3,ATP-binding cassette B25,STARIK 1
A.thaliana TAIR10	AT1G63720
A.thaliana TAIR10	AT3G08590 - 2,3-biphosphoglycerate-independent phosphoglycerate mutase 2,Phosphoglycerate mutase, 2,3-bisphosphoglycerate-independent
A.thaliana TAIR10	AT1G07180 - alternative NAD(P)H dehydrogenase 1,ARABIDOPSIS THALIANA INTERNAL NON-PHOSPHORYLATING NAD ( P ) H DEHYDROGENASE
A.thaliana TAIR10	AT4G23400 - plasma membrane intrinsic protein 1;5
A.thaliana TAIR10	AT3G57920 - squamosa promoter binding protein-like 15
A.thaliana TAIR10	AT5G03730 - CONSTITUTIVE TRIPLE RESPONSE 1,Protein kinase superfamily protein,SUGAR-INSENSITIVE 1
A.thaliana TAIR10	AT1G03230 - Eukaryotic aspartyl protease family protein
A.thaliana TAIR10	AT4G29033 - Defensin-like (DEFL) family protein
A.thaliana TAIR10	AT4G29900 - autoinhibited Ca(2+)-ATPase 10,COMPACT INFLORESCENCE 1
A.thaliana TAIR10	AT4G17800 - AT-hook motif nuclear localized protein 23,Predicted AT-hook DNA-binding family protein
A.thaliana TAIR10	AT5G16850 - telomerase reverse transcriptase
A.thaliana TAIR10	AT2G22370 - mediator 18
A.thaliana TAIR10	AT1G21140 - Vacuolar Iron Transporter-Like 1,Vacuolar iron transporter (VIT) family protein
A.thaliana TAIR10	AT3G11340 - UDP-dependent glycosyltransferase 76B1,UDP-Glycosyltransferase superfamily protein
A.thaliana TAIR10	AT2G20340 - aromatic aldehyde synthase,Pyridoxal phosphate (PLP)-dependent transferases superfamily protein
A.thaliana TAIR10	AT2G23980 - cyclic nucleotide-gated channel 6
A.thaliana TAIR10	AT1G07350 - RNA-binding (RRM/RBD/RNP motifs) family protein,serine/arginine rich-like protein 45a
A.thaliana TAIR10	AT1G02940 - glutathione S-transferase (class phi) 5,GLUTATHIONE S-TRANSFERASE (CLASS PHI) 5
A.thaliana TAIR10	AT2G21740 - EGG CELL 1.2,Protein of unknown function (DUF1278)
A.thaliana TAIR10	AT2G40190 - LEAF WILTING 3,UDP-Glycosyltransferase superfamily protein
A.thaliana TAIR10	AT1G75050 - Pathogenesis-related thaumatin superfamily protein
A.thaliana TAIR10	AT4G19038 - low-molecular-weight cysteine-rich 15
A.thaliana TAIR10	AT3G02310 - AGAMOUS-like 4,K-box region and MADS-box transcription factor family protein,SEPALLATA 2
A.thaliana TAIR10	AT3G53540 - TON1 Recruiting Motif 19
A.thaliana TAIR10	AT5G42130 - Mitochondrial substrate carrier family protein,MitoFerrinLike1
A.thaliana TAIR10	AT1G30400 - Arabidopsis thaliana ATP-binding cassette C1,ARABIDOPSIS THALIANA MULTIDRUG RESISTANCE-ASSOCIATED PROTEIN 1,ATP-binding cassette C1,multidrug resistance-associated protein 1
A.thaliana TAIR10	AT2G48070 - resistance to phytophthora 1,RESISTANCE TO PHYTOPHTHORA 1
A.thaliana TAIR10	AT1G31280 - argonaute 2,Argonaute family protein
A.thaliana TAIR10	AT5G24470 - pseudo-response regulator 5
A.thaliana TAIR10	AT4G05530 - indole-3-butyric acid response 1,SHORT-CHAIN DEHYDROGENASE/REDUCTASE A
A.thaliana TAIR10	AT2G21640 - (1 of 2) PTHR33622:SF26 - MARKER FOR OXIDATIVE STRESS RESPONSE PROTEIN
A.thaliana TAIR10	AT4G25960 - ATP-binding cassette B2,P-glycoprotein 2
A.thaliana TAIR10	ATCG00170 - DNA-directed RNA polymerase family protein
A.thaliana TAIR10	AT1G35860 - translocon outer membrane complex 75-I
A.thaliana TAIR10	AT4G20810 - transcription initiation factor IIE (TFIIE) alpha subunit family protein / general transcription factor TFIIE family protein
A.thaliana TAIR10	AT1G59580 - mitogen-activated protein kinase homolog 2
A.thaliana TAIR10	AT1G53710 - Calcineurin-like metallo-phosphoesterase superfamily protein
A.thaliana TAIR10	AT4G02520 - glutathione S-transferase PHI 2
A.thaliana TAIR10	AT4G30870 - ARABIDOPSIS THALIANA MMS AND UV SENSITIVE 81,MMS AND UV SENSITIVE 81,Restriction endonuclease, type II-like superfamily protein
A.thaliana TAIR10	AT1G64520 - regulatory particle non-ATPase 12A
A.thaliana TAIR10	AT4G28400 - Protein phosphatase 2C family protein
A.thaliana TAIR10	AT5G57220 - \"cytochrome P450, family 81, subfamily F, polypeptide 2\,cytochrome P450, family 81, subfamily F, polypeptide 2
A.thaliana TAIR10	AT1G53580 - ETHE1-LIKE,ETHYLMALONIC ENCEPHALOPATHY PROTEIN1,GLYOXALASE 2-3,glyoxalase II 3
A.thaliana TAIR10	AT1G68640 - bZIP transcription factor family protein,PERIANTHIA,TGACG sequence-specific binding protein 8
A.thaliana TAIR10	AT3G19600 - C-terminal domain phosphatase-like 5,Haloacid dehalogenase-like hydrolase (HAD) superfamily protein
A.thaliana TAIR10	AT5G41990 - EMF1-Interacting Protein 1,with no lysine (K) kinase 8
A.thaliana TAIR10	AT2G43030 - Ribosomal protein L3 family protein
A.thaliana TAIR10	AT1G16970 - ARABIDOPSIS THALIANA KU70 HOMOLOG,KU70 homolog
A.thaliana TAIR10	AT1G54410 - dehydrin 11kDa,dehydrin family protein
A.thaliana TAIR10	AT2G26150 - heat shock transcription factor A2
A.thaliana TAIR10	AT3G02940 - myb domain protein 107
A.thaliana TAIR10	AT1G31260 - zinc transporter 10 precursor
A.thaliana TAIR10	AT5G25220 - KNOTTED1-like homeobox gene 3
A.thaliana TAIR10	AT1G30010 - Intron maturase, type II family protein,nuclear maturase 1
A.thaliana TAIR10	AT3G62110 - Pectin lyase-like superfamily protein
A.thaliana TAIR10	AT3G02880 - Leucine-rich repeat protein kinase family protein
A.thaliana TAIR10	AT4G37510 - Ribonuclease III family protein
A.thaliana TAIR10	AT5G56030 - EARLY-RESPONSIVE TO DEHYDRATION 8,heat shock protein 81-2,heat shock protein 81.2,HEAT SHOCK PROTEIN 90.2,HEAT SHOCK PROTEIN 90.2
A.thaliana TAIR10	AT2G18950 - HOMOGENTISATE PHYTYLTRANSFERASE,homogentisate phytyltransferase 1,VITAMIN E 2
A.thaliana TAIR10	AT1G15750 - TOPLESS,Transducin family protein / WD-40 repeat family protein,WUS-INTERACTING PROTEIN 1
A.thaliana TAIR10	AT1G74230 - glycine-rich RNA-binding protein 5,Organelle RNA Recognition Motif-containing4,RNA-binding glycine-rich protein A2
A.thaliana TAIR10	AT4G20830 - FAD-binding Berberine family protein
A.thaliana TAIR10	AT3G15352 - ARABIDOPSIS THALIANA CYTOCHROME C OXIDASE 17,cytochrome c oxidase 17
A.thaliana TAIR10	AT4G09360 - NB-ARC domain-containing disease resistance protein
A.thaliana TAIR10	AT4G25200 - mitochondrion-localized small heat shock protein 23.6
A.thaliana TAIR10	AT3G44380 - Late embryogenesis abundant (LEA) hydroxyproline-rich glycoprotein family
A.thaliana TAIR10	AT1G06570 - 4-hydroxyphenylpyruvate dioxygenase,phytoene desaturation 1
A.thaliana TAIR10	AT1G64400 - AMP-dependent synthetase and ligase family protein,long-chain acyl-CoA synthetase 3
A.thaliana TAIR10	AT3G21150 - B-box 32,B-box domain protein 32,EMF1-Interacting Protein 6
A.thaliana TAIR10	AT1G04400 - cryptochrome 2
A.thaliana TAIR10	AT2G28085 - SAUR-like auxin-responsive protein family,SMALL AUXIN UPREGULATED RNA 42
A.thaliana TAIR10	AT4G37040 - methionine aminopeptidase 1D
A.thaliana TAIR10	AT3G62030 - cyclophilin 20-3,rotamase CYP 4
A.thaliana TAIR10	AT5G04340 - COLD INDUCED ZINC FINGER PROTEIN 2,zinc finger of Arabidopsis thaliana 6
A.thaliana TAIR10	AT2G36220 - (1 of 1) PTHR34120:SF24 - TPX2_IMPORTIN DOMAIN-CONTAINING PROTEIN
A.thaliana TAIR10	AT4G26740 - ARABIDOPSIS THALIANA PEROXYGENASE 1,CALEOSIN1,seed gene 1
A.thaliana TAIR10	AT4G20270 - BARELY ANY MERISTEM 3,Leucine-rich receptor-like protein kinase family protein
A.thaliana TAIR10	AT4G14365 - XB3 ortholog 4 in Arabidopsis thaliana
A.thaliana TAIR10	AT1G05240 - Peroxidase superfamily protein
A.thaliana TAIR10	AT5G46860 - ARABIDOPSIS THALIANA SYNTAXIN OF PLANTS 22,ARABIDOPSIS THALIANA VACUOLAR MORPHOLOGY 3,SHOOT GRAVITROPISM 3,SYNTAXIN OF PLANTS 22,Syntaxin/t-SNARE family protein,VACUOLAR MORPHOLOGY 3
A.thaliana TAIR10	AT5G66210 - calcium-dependent protein kinase 28
A.thaliana TAIR10	AT5G39365 - Defensin-like (DEFL) family protein
A.thaliana TAIR10	AT3G03000 - EF hand calcium-binding protein family
A.thaliana TAIR10	AT1G50140 - P-loop containing nucleoside triphosphate hydrolases superfamily protein
A.thaliana TAIR10	AT1G64750 - deletion of SUV3 suppressor 1(I)
A.thaliana TAIR10	AT1G27450 - adenine phosphoribosyl transferase 1,ARABIDOPSIS THALIANA ADENINE PHOSPHORIBOSYLTRANSFERASE 1
A.thaliana TAIR10	AT3G29800 - P-loop containing nucleoside triphosphate hydrolases superfamily protein
A.thaliana TAIR10	AT3G49970 - Phototropic-responsive NPH3 family protein
A.thaliana TAIR10	AT2G19060 - SGNH hydrolase-type esterase superfamily protein
A.thaliana TAIR10	AT4G23980 - auxin response factor 9
A.thaliana TAIR10	AT1G48380 - HYPOCOTYL 7,root hair initiation protein root hairless 1 (RHL1),ROOT HAIRLESS 1
A.thaliana TAIR10	AT1G18710 - myb domain protein 47
A.thaliana TAIR10	AT3G51790 - A. thaliana homolog of E. coli CcmE,transmembrane protein G1P-related 1
A.thaliana TAIR10	AT2G43710 - FATTY ACID BIOSYNTHESIS 2,lesion dwarf mimic 1,Plant stearoyl-acyl-carrier-protein desaturase family protein,suppressor of SA insensitive 2
A.thaliana TAIR10	AT5G21990 - outer envelope protein 61,tetratricopeptide repeat 7,Tetratricopeptide repeat (TPR)-like superfamily protein
A.thaliana TAIR10	AT2G05710 - aconitase 3
A.thaliana TAIR10	AT4G18710 - BRASSINOSTEROID-INSENSITIVE 2,DWARF 12,Protein kinase superfamily protein,SHAGGY-LIKE KINASE 21,ULTRACURVATA 1
A.thaliana TAIR10	AT4G18360 - Aldolase-type TIM barrel family protein,glycolate oxidase 3
A.thaliana TAIR10	AT1G01550 - BYPASS 1,Protein of unknown function (DUF793)
A.thaliana TAIR10	AT3G05630 - phospholipase D P2,PHOSPHOLIPASE D ZETA 2
A.thaliana TAIR10	AT5G64740 - cellulose synthase 6,ISOXABEN RESISTANT 2,PROCUSTE 1
A.thaliana TAIR10	AT2G29480 - GLUTATHIONE S-TRANSFERASE 20,glutathione S-transferase tau 2
A.thaliana TAIR10	AT2G34020 - Calcium-binding EF-hand family protein
A.thaliana TAIR10	AT2G20360 - NAD(P)-binding Rossmann-fold superfamily protein
A.thaliana TAIR10	AT1G34670 - myb domain protein 93
A.thaliana TAIR10	AT5G48160 - OBERON2,Protein of unknown function (DUF1423)
A.thaliana TAIR10	AT5G12140 - cystatin-1
A.thaliana TAIR10	AT3G49600 - ubiquitin-specific protease 26
A.thaliana TAIR10	AT1G77460 - Armadillo/beta-catenin-like repeat ; C2 calcium/lipid-binding domain (CaLB) protein,CELLULOSE SYNTHASE INTERACTIVE 3
A.thaliana TAIR10	AT3G01480 - ARABIDOPSIS CYCLOPHILIN 38,cyclophilin 38
A.thaliana TAIR10	AT3G49680 - branched-chain aminotransferase 3
A.thaliana TAIR10	AT3G61600 - light-response BTB 2,POZ/BTB containin G-protein 1
A.thaliana TAIR10	AT1G72870 - Disease resistance protein (TIR-NBS class)
A.thaliana TAIR10	AT2G44100 - guanosine nucleotide diphosphate dissociation inhibitor 1
A.thaliana TAIR10	AT5G20635 - Arabidopsis G protein gamma subunit 3
A.thaliana TAIR10	AT3G15940 - UDP-Glycosyltransferase superfamily protein
A.thaliana TAIR10	AT2G28960 - Leucine-rich repeat protein kinase family protein
A.thaliana TAIR10	AT5G51470 - Auxin-responsive GH3 family protein
A.thaliana TAIR10	AT5G64260 - EXORDIUM like 2
A.thaliana TAIR10	AT4G35520 - MUTL protein homolog 3
A.thaliana TAIR10	AT3G05740 - RECQ helicase l1
A.thaliana TAIR10	AT2G18280 - tubby like protein 2
A.thaliana TAIR10	AT2G23680 - Cold acclimation protein WCOR413 family
A.thaliana TAIR10	AT2G13560 - NAD-dependent malic enzyme 1
A.thaliana TAIR10	AT3G15240 - Serine/threonine-protein kinase WNK (With No Lysine)-related
A.thaliana TAIR10	AT3G24630 - TON1 Recruiting Motif 34
A.thaliana TAIR10	AT3G25190 - Vacuolar Iron Transporter-Like 5,Vacuolar iron transporter (VIT) family protein
A.thaliana TAIR10	AT2G23840 - HNH endonuclease
A.thaliana TAIR10	AT5G01330 - pyruvate decarboxylase-3
A.thaliana TAIR10	AT5G06530 - ABC-2 type transporter family protein,Arabidopsis thaliana ATP-binding cassette G22,ATP-binding cassette G22
A.thaliana TAIR10	AT5G59890 - actin depolymerizing factor 4
A.thaliana TAIR10	AT3G44720 - arogenate dehydratase 4
A.thaliana TAIR10	AT1G71100 - RADIAL SWELLING 10,Ribose 5-phosphate isomerase, type A protein
A.thaliana TAIR10	AT2G30710 - Ypt/Rab-GAP domain of gyp1p superfamily protein
A.thaliana TAIR10	AT2G42070 - ARABIDOPSIS THALIANA NUDIX HYDROLASE HOMOLOG 23,nudix hydrolase homolog 23
A.thaliana TAIR10	AT1G02120 - GRAM domain family protein,VASCULAR ASSOCIATED DEATH1
A.thaliana TAIR10	AT1G44760 - Adenine nucleotide alpha hydrolases-like superfamily protein
A.thaliana TAIR10	AT1G51480 - Disease resistance protein (CC-NBS-LRR class) family,Resistance Silenced Gene 1
A.thaliana TAIR10	AT5G08020 - ARABIDOPSIS THALIANA RPA70-KDA SUBUNIT B,Replication Protein A 1B,RPA70-kDa subunit B
A.thaliana TAIR10	AT3G53030 - ser/arg-rich protein kinase 4
A.thaliana TAIR10	AT1G43670 - Arabidopsis thaliana cytosolic fructose-1,6-bisphosphatase,fructose-1,6-bisphosphatase,FRUCTOSE INSENSITIVE 1,Inositol monophosphatase family protein
A.thaliana TAIR10	AT3G50020 - Serine protease inhibitor, potato inhibitor I-type family protein
A.thaliana TAIR10	AT3G20830 - AGC2 kinase 4,AGC (cAMP-dependent, cGMP-dependent and protein kinase C) kinase family protein,UNICORN-like
A.thaliana TAIR10	AT5G45380 - DEGRADATION OF UREA 3,solute:sodium symporters;urea transmembrane transporters
A.thaliana TAIR10	AT4G19010 - AMP-dependent synthetase and ligase family protein
A.thaliana TAIR10	AT1G80830 - natural resistance-associated macrophage protein 1
A.thaliana TAIR10	AT4G08450 - Disease resistance protein (TIR-NBS-LRR class) family
A.thaliana TAIR10	AT3G27240 - Cytochrome C1 family
A.thaliana TAIR10	AT1G59750 - auxin response factor 1
A.thaliana TAIR10	AT5G46910 - Transcription factor jumonji (jmj) family protein / zinc finger (C5HC2 type) family protein
A.thaliana TAIR10	AT3G60540 - Preprotein translocase Sec, Sec61-beta subunit protein
A.thaliana TAIR10	AT1G15020 - quiescin-sulfhydryl oxidase 1
A.thaliana TAIR10	AT5G40645 - RPM1-interacting protein 4 (RIN4) family protein
A.thaliana TAIR10	AT5G62380 - NAC-domain protein 101,VASCULAR-RELATED NAC-DOMAIN 6
A.thaliana TAIR10	AT3G28930 - AIG2-like (avirulence induced gene) family protein,AVRRPT2-INDUCED GENE 2
A.thaliana TAIR10	AT2G34930 - disease resistance family protein / LRR family protein
A.thaliana TAIR10	AT3G47480 - Calcium-binding EF-hand family protein
A.thaliana TAIR10	AT2G37170 - plasma membrane intrinsic protein 2,PLASMA MEMBRANE INTRINSIC PROTEIN 2;2
A.thaliana TAIR10	ATCG00480 - ATP synthase subunit beta
A.thaliana TAIR10	AT1G20200 - EMBRYO DEFECTIVE 2719,HAPLESS 15,PAM domain (PCI/PINT associated module) protein
A.thaliana TAIR10	AT1G50900 - Ankyrin repeat family protein,Grana Deficient Chloroplast 1,LHCP translocation defect
A.thaliana TAIR10	AT4G18780 - CELLULOSE SYNTHASE 8,cellulose synthase family protein,IRREGULAR XYLEM 1,LEAF WILTING 2
A.thaliana TAIR10	AT1G31180 - ARABIDOPSIS ISOPROPYLMALATE DEHYDROGENASE 3,ISOPROPYLMALATE DEHYDROGENASE 1,isopropylmalate dehydrogenase 3
A.thaliana TAIR10	AT4G16280 - RNA binding;abscisic acid binding
A.thaliana TAIR10	AT1G68765 - INFLORESCENCE DEFICIENT IN ABSCISSION,Putative membrane lipoprotein
A.thaliana TAIR10	AT4G11650 - osmotin 34
A.thaliana TAIR10	AT5G42900 - cold regulated gene 27
A.thaliana TAIR10	AT1G55690 - Sec14p-like phosphatidylinositol transfer family protein
A.thaliana TAIR10	AT5G65600 - Concanavalin A-like lectin protein kinase family protein,L-type lectin receptor kinase IX.2
A.thaliana TAIR10	AT1G64970 - gamma-tocopherol methyltransferase,VITAMIN E DEFICIENT 4
A.thaliana TAIR10	AT2G01690 - ARM repeat superfamily protein
A.thaliana TAIR10	AT4G15870 - terpene synthase 1
A.thaliana TAIR10	AT5G20090 - mitochondrial pyruvate carrier 1,Uncharacterised protein family (UPF0041)
A.thaliana TAIR10	AT5G67500 - ARABIDOPSIS THALIANA VOLTAGE DEPENDENT ANION CHANNEL 2,voltage dependent anion channel 2
A.thaliana TAIR10	AT2G02130 - low-molecular-weight cysteine-rich 68
A.thaliana TAIR10	AT2G04540 - Beta-ketoacyl synthase,mitochondrial beta-ketoacyl-ACP synthase
A.thaliana TAIR10	AT1G70060 - SIN3-like 4
A.thaliana TAIR10	AT3G49910 - Translation protein SH3-like family protein
A.thaliana TAIR10	AT1G56200 - embryo defective 1303
A.thaliana TAIR10	AT4G30580 - EMBRYO DEFECTIVE 1995,lysophosphatidic acid acyltransferase 1,Phospholipid/glycerol acyltransferase family protein
A.thaliana TAIR10	AT1G80245 - Spc97 / Spc98 family of spindle pole body (SBP) component
A.thaliana TAIR10	AT3G03830 - SAUR-like auxin-responsive protein family,SMALL AUXIN UP RNA 28
A.thaliana TAIR10	AT5G60790 - ABC transporter family protein,ARABIDOPSIS THALIANA GENERAL CONTROL NON-REPRESSIBLE 1,ATP-binding cassette F1,GENERAL CONTROL NON-REPRESSIBLE 1
A.thaliana TAIR10	AT5G48595 - Defensin-like (DEFL) family protein
A.thaliana TAIR10	AT1G21680 - DPP6 N-terminal domain-like protein
A.thaliana TAIR10	AT1G51950 - indole-3-acetic acid inducible 18
A.thaliana TAIR10	AT1G01560 - MAP kinase 11
A.thaliana TAIR10	AT1G05800 - alpha/beta-Hydrolases superfamily protein,DONGLE
A.thaliana TAIR10	AT5G09850 - Transcription elongation factor (TFIIS) family protein
A.thaliana TAIR10	AT4G21830 - methionine sulfoxide reductase B7
A.thaliana TAIR10	AT4G28080 - REDUCED CHLOROPLAST COVERAGE 2,Tetratricopeptide repeat (TPR)-like superfamily protein
A.thaliana TAIR10	AT3G12955 - SAUR-like auxin-responsive protein family,SMALL AUXIN UPREGULATED RNA 74
A.thaliana TAIR10	AT2G46150 - Late embryogenesis abundant (LEA) hydroxyproline-rich glycoprotein family
A.thaliana TAIR10	AT1G70710 - CELLULASE 1,glycosyl hydrolase 9B1
A.thaliana TAIR10	AT1G30660 - nucleic acid binding;nucleic acid binding
A.thaliana TAIR10	AT4G26120 - Ankyrin repeat family protein / BTB/POZ domain-containing protein
A.thaliana TAIR10	AT2G24120 - DNA/RNA polymerases superfamily protein,PIGMENT DEFECTIVE 319,SCABRA 3
A.thaliana TAIR10	AT1G30480 - D111/G-patch domain-containing protein,DNA-DAMAGE-REPAIR/TOLERATION PROTEIN 111,REQUIRED FOR SNC4-1D 2
A.thaliana TAIR10	AT2G17520 - ARABIDOPSIS THALIANA INOSITOL REQUIRING 1-2,Endoribonuclease/protein kinase IRE1-like,INOSITOL REQUIRING 1-2
A.thaliana TAIR10	AT1G44414 - (1 of 1) PF17032 - zinc-ribbon family (zinc_ribbon_15)
A.thaliana TAIR10	AT2G45980 - ATG8-interacting protein 1
A.thaliana TAIR10	AT3G11900 - aromatic and neutral transporter 1
A.thaliana TAIR10	AT5G05400 - LRR and NB-ARC domains-containing disease resistance protein
A.thaliana TAIR10	AT4G38210 - EXPANSIN 20,expansin A20
A.thaliana TAIR10	AT2G18690 - (1 of 2) PTHR33133:SF62 - EXPRESSED PROTEIN-RELATED
A.thaliana TAIR10	AT4G31240 - nucleoredoxin 2,protein kinase C-like zinc finger protein
A.thaliana TAIR10	AT2G41070 - Basic-leucine zipper (bZIP) transcription factor family protein,ENHANCED EM LEVEL
A.thaliana TAIR10	AT1G67865
A.thaliana TAIR10	AT1G49950 - telomere repeat binding factor 1,TELOMERE REPEAT BINDING FACTOR 1
A.thaliana TAIR10	AT5G47260 - ATP binding;GTP binding;nucleotide binding;nucleoside-triphosphatases
A.thaliana TAIR10	AT1G67700 - HYPERSENSITIVE TO HIGH LIGHT 1
A.thaliana TAIR10	AT5G39970 - catalytics
A.thaliana TAIR10	AT5G67340 - ARM repeat superfamily protein
A.thaliana TAIR10	AT3G14490 - Terpenoid cyclases/Protein prenyltransferases superfamily protein
A.thaliana TAIR10	AT3G21710 - VASCULAR-RELATED UNKNOWN PROTEIN 1
A.thaliana TAIR10	AT1G16410 - BUSHY 1,cytochrome p450 79f1,SUPERSHOOT 1
A.thaliana TAIR10	AT3G18680 - Amino acid kinase family protein
A.thaliana TAIR10	AT5G18900 - 2-oxoglutarate (2OG) and Fe(II)-dependent oxygenase superfamily protein
A.thaliana TAIR10	AT5G66910 - Disease resistance protein (CC-NBS-LRR class) family
A.thaliana TAIR10	AT2G48150 - glutathione peroxidase 4
A.thaliana TAIR10	AT5G10720 - CYTOKININ INDEPENDENT 2,histidine kinase 5
A.thaliana TAIR10	AT5G02490 - Heat shock protein 70 (Hsp 70) family protein
A.thaliana TAIR10	AT2G20560 - DNAJ heat shock family protein
A.thaliana TAIR10	AT1G72150 - PATELLIN 1
A.thaliana TAIR10	AT5G58003 - C-terminal domain phosphatase-like 4
A.thaliana TAIR10	AT3G12360 - Ankyrin repeat family protein,INCREASED TOLERANCE TO NACL
A.thaliana TAIR10	AT4G01420 - calcineurin B-like protein 5
A.thaliana TAIR10	AT3G25930 - Adenine nucleotide alpha hydrolases-like superfamily protein
A.thaliana TAIR10	AT5G12410 - THUMP domain-containing protein
A.thaliana TAIR10	AT4G39917 - low-molecular-weight cysteine-rich 45
A.thaliana TAIR10	AT1G05840 - Eukaryotic aspartyl protease family protein
A.thaliana TAIR10	AT3G02910 - AIG2-like (avirulence induced gene) family protein
A.thaliana TAIR10	AT5G01830 - ARM repeat superfamily protein
A.thaliana TAIR10	AT5G23760 - Copper transport protein family
A.thaliana TAIR10	AT4G34460 - ERECTA-LIKE 4,GTP binding protein beta 1
A.thaliana TAIR10	AT4G23700 - cation/H+ exchanger 17
A.thaliana TAIR10	AT1G59833 - Defensin-like (DEFL) family protein
A.thaliana TAIR10	AT1G76500 - AT-hook motif nuclear-localized protein 29,Predicted AT-hook DNA-binding family protein,SUPPRESSOR OF PHYB-4#3
A.thaliana TAIR10	AT3G21690 - MATE efflux family protein
A.thaliana TAIR10	AT3G09830 - PATTERN-TRIGGERED IMMUNITY (PTI) COMPROMISED RECEPTOR-LIKE CYTOPLASMIC KINASE 1,Protein kinase superfamily protein
A.thaliana TAIR10	AT3G50820 - OXYGEN EVOLVING COMPLEX SUBUNIT 33 KDA,photosystem II subunit O-2,PHOTOSYSTEM II SUBUNIT O-2
A.thaliana TAIR10	AT5G54960 - pyruvate decarboxylase-2
A.thaliana TAIR10	AT5G58400 - Peroxidase superfamily protein
A.thaliana TAIR10	AT3G60320 - NITRATE REGULATORY GENE 2,Protein of unknown function (DUF630 and DUF632)
A.thaliana TAIR10	AT1G67870 - glycine-rich protein
A.thaliana TAIR10	AT5G46040 - Major facilitator superfamily protein
A.thaliana TAIR10	AT5G51830 - Fructokinase 7,pfkB-like carbohydrate kinase family protein
A.thaliana TAIR10	AT1G69670 - ARABIDOPSIS THALIANA CULLIN 3B,cullin 3B
A.thaliana TAIR10	AT5G25980 - BETA GLUCOSIDASE 37,glucoside glucohydrolase 2
A.thaliana TAIR10	AT5G53370 - pectin methylesterase PCR fragment F,PECTIN METHYLESTERASE PCR FRAGMENT F
A.thaliana TAIR10	AT4G21120 - amino acid transporter 1,CATIONIC AMINO ACID TRANSPORTER 1
A.thaliana TAIR10	AT4G38320 - heptahelical protein 5
A.thaliana TAIR10	AT5G65780 - branched-chain amino acid aminotransferase 5 / branched-chain amino acid transaminase 5 (BCAT5)
A.thaliana TAIR10	AT5G49230 - Drought-responsive family protein,HYPERSENSITIVE TO RED AND BLUE
A.thaliana TAIR10	AT2G02510 - NADH dehydrogenase (ubiquinone)s
A.thaliana TAIR10	AT1G08620 - Transcription factor jumonji (jmj) family protein / zinc finger (C5HC2 type) family protein
A.thaliana TAIR10	AT3G17070 - Peroxidase family protein
A.thaliana TAIR10	AT1G45616 - receptor like protein 6
A.thaliana TAIR10	AT3G57520 - raffinose synthase 2,seed imbibition 2
A.thaliana TAIR10	AT3G13050 - Major facilitator superfamily protein,nicotinate transporter
A.thaliana TAIR10	AT4G28860 - casein kinase I-like 4
A.thaliana TAIR10	AT1G02280 - PLASTID PROTEIN IMPORT 1,translocon at the outer envelope membrane of chloroplasts 33
A.thaliana TAIR10	AT5G13530 - KEEP ON GOING,protein kinases;ubiquitin-protein ligases
A.thaliana TAIR10	AT1G65840 - polyamine oxidase 4
A.thaliana TAIR10	AT2G39770 - CYTOKINESIS DEFECTIVE 1,EMBRYO DEFECTIVE 101,GDP-MANNOSE PYROPHOSPHORYLASE 1,Glucose-1-phosphate adenylyltransferase family protein,SENSITIVE TO OZONE 1,VITAMIN C DEFECTIVE 1
A.thaliana TAIR10	AT4G09420 - Disease resistance protein (TIR-NBS class)
A.thaliana TAIR10	AT3G13300 - Transducin/WD40 repeat-like superfamily protein,VARICOSE
A.thaliana TAIR10	AT5G61210 - soluble N-ethylmaleimide-sensitive factor adaptor protein 33
A.thaliana TAIR10	AT4G19690 - ARABIDOPSIS IRON-REGULATED TRANSPORTER 1,iron-regulated transporter 1
A.thaliana TAIR10	AT3G55840 - Hs1pro-1 protein
A.thaliana TAIR10	AT5G18070 - DNA-DAMAGE-REPAIR/TOLERATION 101,phosphoglucosamine mutase-related
A.thaliana TAIR10	AT1G71960 - Arabidopsis thaliana ATP-binding cassette G25,ATP-binding casette family G25,ATP-binding casette G25
A.thaliana TAIR10	AT3G51450 - Calcium-dependent phosphotriesterase superfamily protein
A.thaliana TAIR10	AT1G52660 - P-loop containing nucleoside triphosphate hydrolases superfamily protein
A.thaliana TAIR10	AT1G17745 - 3-phosphoglycerate dehydrogenase,D-3-phosphoglycerate dehydrogenase,phosphoglycerate dehydrogenase 2
A.thaliana TAIR10	AT3G18730 - BRUSHY1,MGOUN3,tetratricopeptide repeat (TPR)-containing protein,TONSOKU
A.thaliana TAIR10	AT4G38160 - mitochondrial transcription termination factor 6,Mitochondrial transcription termination factor family protein,pigment defective 191
A.thaliana TAIR10	AT1G70800 - C2-domain ABA-related6,Calcium-dependent lipid-binding (CaLB domain) family protein,ENHANCED BENDING 1
A.thaliana TAIR10	AT2G41290 - strictosidine synthase-like 2
A.thaliana TAIR10	AT2G28790 - Pathogenesis-related thaumatin superfamily protein
A.thaliana TAIR10	AT4G03240 - frataxin homolog
A.thaliana TAIR10	AT5G24030 - SLAC1 homologue 3
A.thaliana TAIR10	AT5G16990 - Zinc-binding dehydrogenase family protein
A.thaliana TAIR10	AT3G25520 - OLIGOCELLULA 5,PIGGYBACK3,ribosomal protein L5,RIBOSOMAL PROTEIN L5 A
A.thaliana TAIR10	AT5G17820 - Peroxidase 57,Peroxidase superfamily protein
A.thaliana TAIR10	AT1G50280 - Phototropic-responsive NPH3 family protein
A.thaliana TAIR10	AT2G38710 - AMMECR1 family
A.thaliana TAIR10	AT1G61100 - disease resistance protein (TIR class), putative
A.thaliana TAIR10	AT3G03840 - SAUR-like auxin-responsive protein family,SMALL AUXIN UP RNA 27
A.thaliana TAIR10	AT5G58760 - damaged DNA binding 2
A.thaliana TAIR10	AT2G28550 - related to AP2.7,TARGET OF EARLY ACTIVATION TAGGED (EAT) 1
A.thaliana TAIR10	AT4G18170 - WRKY DNA-binding protein 28
A.thaliana TAIR10	AT5G26920 - Cam-binding protein 60-like G
A.thaliana TAIR10	AT1G72360 - ethylene response factor 73,HYPOXIA RESPONSIVE ERF (ETHYLENE RESPONSE FACTOR) 1,Integrase-type DNA-binding superfamily protein
A.thaliana TAIR10	AT5G66390 - PEROXIDASE 72,Peroxidase superfamily protein
A.thaliana TAIR10	AT4G32210 - succinate dehydrogenase 3-2
A.thaliana TAIR10	AT3G01830 - Calcium-binding EF-hand family protein
A.thaliana TAIR10	AT3G52730 - ubiquinol-cytochrome C reductase UQCRX/QCR9-like family protein
A.thaliana TAIR10	AT1G50010 - tubulin alpha-2 chain
A.thaliana TAIR10	AT1G15580 - AUXIN-INDUCIBLE 2-27,indole-3-acetic acid inducible 5
A.thaliana TAIR10	AT1G75840 - ARABIDOPSIS THALIANA GERANYLGERANYLATED PROTEIN 3,RAC-like GTP binding protein 5,RHO-LIKE GTP BINDING PROTEIN 4
A.thaliana TAIR10	AT3G12320 - night light-inducible and clock-regulated 3
A.thaliana TAIR10	AT1G68010 - hydroxypyruvate reductase
A.thaliana TAIR10	AT1G71695 - Peroxidase superfamily protein
A.thaliana TAIR10	AT5G49910 - chloroplast heat shock protein 70-2,HEAT SHOCK PROTEIN 70-7
A.thaliana TAIR10	AT2G25140 - casein lytic proteinase B4,CASEIN LYTIC PROTEINASE B-M,HEAT SHOCK PROTEIN 98.7
A.thaliana TAIR10	AT1G14870 - PLANT CADMIUM RESISTANCE 2
A.thaliana TAIR10	AT5G21040 - F-box protein 2
A.thaliana TAIR10	AT4G22260 - Alternative oxidase family protein,IMMUTANS,plastid terminal oxidase
A.thaliana TAIR10	AT4G08230 - glycine-rich protein
A.thaliana TAIR10	AT4G02070 - ARABIDOPSIS THALIANA MUTS HOMOLOG 6,MUTS homolog 6,MUTS HOMOLOG 6-1
A.thaliana TAIR10	AT3G47550 - RING/FYVE/PHD zinc finger superfamily protein
A.thaliana TAIR10	AT4G35480 - RING-H2 finger A3B
A.thaliana TAIR10	AT1G21160 - eukaryotic translation initiation factor 2 (eIF-2) family protein
A.thaliana TAIR10	AT4G20130 - plastid transcriptionally active 14
A.thaliana TAIR10	AT5G53530 - vacuolar protein sorting 26A
A.thaliana TAIR10	AT4G32410 - anisotropy1,cellulose synthase 1,CELLULOSE SYNTHASE 1,RADIALLY SWOLLEN 1
A.thaliana TAIR10	AT1G67500 - recovery protein 3
A.thaliana TAIR10	AT5G24120 - SIGMA FACTOR 5,sigma factor E
A.thaliana TAIR10	AT5G45190 - Cyclin family protein
A.thaliana TAIR10	AT5G52660 - Homeodomain-like superfamily protein,REVEILLE 6
A.thaliana TAIR10	AT5G02390 - DUO1-activated unknown 1,Protein of unknown function (DUF3741),TON1 Recruiting Motif 16
A.thaliana TAIR10	AT3G48100 - ARABIDOPSIS THALIANA RESPONSE REGULATOR 2,INDUCED BY CYTOKININ 6,response regulator 5
A.thaliana TAIR10	AT5G54380 - protein kinase family protein,THESEUS1
A.thaliana TAIR10	AT3G02820 - zinc knuckle (CCHC-type) family protein
A.thaliana TAIR10	AT1G52400 - A. THALIANA BETA-GLUCOSIDASE 1,beta glucosidase 18,BETA-GLUCOSIDASE HOMOLOG 1
A.thaliana TAIR10	AT2G04550 - DUAL SPECIFICITY PROTEIN PHOSPHATASE 1E,indole-3-butyric acid response 5
A.thaliana TAIR10	AT1G74590 - glutathione S-transferase TAU 10,GLUTATHIONE S-TRANSFERASE TAU 10
A.thaliana TAIR10	AT3G16340 - ATP-binding cassette G29,pleiotropic drug resistance 1,PLEIOTROPIC DRUG RESISTANCE 1
A.thaliana TAIR10	AT1G61560 - MILDEW RESISTANCE LOCUS O 6,Seven transmembrane MLO family protein
A.thaliana TAIR10	AT4G10270 - Wound-responsive family protein
A.thaliana TAIR10	AT1G58250 - Golgi-body localisation protein domain ;RNA pol II promoter Fmp27 protein domain,hypersensitive to Pi starvation 4,SABRE
A.thaliana TAIR10	AT5G59540 - 2-oxoglutarate (2OG) and Fe(II)-dependent oxygenase superfamily protein
A.thaliana TAIR10	AT3G19380 - plant U-box 25
A.thaliana TAIR10	AT4G04040 - maternal effect embryo arrest 51,Phosphofructokinase family protein
A.thaliana TAIR10	AT3G12110 - actin-11
A.thaliana TAIR10	AT4G10310 - high-affinity K+ transporter 1
A.thaliana TAIR10	AT2G01090 - Ubiquinol-cytochrome C reductase hinge protein
A.thaliana TAIR10	AT4G08980 - F-BOX WITH WD-40 2
A.thaliana TAIR10	AT1G31814 - FRIGIDA like 2
A.thaliana TAIR10	AT4G10910
A.thaliana TAIR10	AT5G45740 - Ubiquitin domain-containing protein
A.thaliana TAIR10	AT2G39920 - HAD superfamily, subfamily IIIB acid phosphatase
A.thaliana TAIR10	AT4G14713 - PEAPOD 1,TIFY domain/Divergent CCT motif family protein
A.thaliana TAIR10	AT2G21220 - SAUR-like auxin-responsive protein family,SMALL AUXIN UPREGULATED RNA 12
A.thaliana TAIR10	AT1G76770 - HSP20-like chaperones superfamily protein
A.thaliana TAIR10	AT5G08055 - Defensin-like (DEFL) family protein
A.thaliana TAIR10	AT3G16530 - Legume lectin family protein
A.thaliana TAIR10	AT4G13660 - pinoresinol reductase 2
A.thaliana TAIR10	AT1G03770 - ARABIDOPSIS THALIANA RING 1B,RING 1B
A.thaliana TAIR10	AT4G35230 - brassinosteroid-signaling kinase 1,BR-signaling kinase 1
A.thaliana TAIR10	AT2G37710 - L-type lectin receptor kinase IV.1,receptor lectin kinase
A.thaliana TAIR10	AT3G11050 - ferritin 2
A.thaliana TAIR10	AT3G46860 - Serine protease inhibitor, potato inhibitor I-type family protein
A.thaliana TAIR10	AT3G22950 - ADP-ribosylation factor C1
A.thaliana TAIR10	AT1G66390 - myb domain protein 90,PRODUCTION OF ANTHOCYANIN PIGMENT 2
A.thaliana TAIR10	AT1G50170 - sirohydrochlorin ferrochelatase B
A.thaliana TAIR10	AT4G12110 - sterol-4alpha-methyl oxidase 1-1
A.thaliana TAIR10	AT3G59920 - RAB GDP dissociation inhibitor 2
A.thaliana TAIR10	AT5G20080 - FAD/NAD(P)-binding oxidoreductase
A.thaliana TAIR10	AT1G01860 - PALEFACE 1,Ribosomal RNA adenine dimethylase family protein
A.thaliana TAIR10	AT3G50000 - \"casein kinase II, alpha chain 2\,casein kinase II, alpha chain 2
A.thaliana TAIR10	AT3G60740 - ARM repeat superfamily protein,CHAMPIGNON,EMBRYO DEFECTIVE 133,TITAN 1,TUBULIN FOLDING COFACTOR D
A.thaliana TAIR10	AT4G27430 - COP1-interacting protein 7
A.thaliana TAIR10	AT5G03680 - Duplicated homeodomain-like superfamily protein,PETAL LOSS
A.thaliana TAIR10	AT4G09984 - low-molecular-weight cysteine-rich 34
A.thaliana TAIR10	AT2G29580 - CCCH-type zinc fingerfamily protein with RNA-binding domain,MOS4-associated complex subunit 5B
A.thaliana TAIR10	AT2G36990 - RNApolymerase sigma-subunit F,SIGMA FACTOR 6
A.thaliana TAIR10	AT5G54500 - flavodoxin-like quinone reductase 1
A.thaliana TAIR10	AT1G66930 - Leaf rust 10 disease-resistance locus receptor- like protein kinase-like2,Protein kinase superfamily protein
A.thaliana TAIR10	AT2G07050 - CONSTITUTIVE ALLENE OXIDE SYNTHASE 1,cycloartenol synthase 1
A.thaliana TAIR10	AT2G42900 - Plant basic secretory protein (BSP) family protein
A.thaliana TAIR10	AT3G13890 - MALE STERILE 35,myb domain protein 26
A.thaliana TAIR10	AT5G24520 - Transducin/WD40 repeat-like superfamily protein,TRANSPARENT TESTA GLABRA 1,UNARMED 23
A.thaliana TAIR10	AT5G52250 - EARLY FLOWERING BY OVEREXPRESSION 1,REPRESSOR OF UV-B PHOTOMORPHOGENESIS 1,Transducin/WD40 repeat-like superfamily protein
A.thaliana TAIR10	AT5G37490 - ARM repeat superfamily protein
A.thaliana TAIR10	AT1G34430 - 2-oxoacid dehydrogenases acyltransferase family protein,embryo defective 3003
A.thaliana TAIR10	AT1G75500 - Usually multiple acids move in and out Transporters 5,Walls Are Thin 1
A.thaliana TAIR10	AT3G22830 - ARABIDOPSIS THALIANA HEAT SHOCK TRANSCRIPTION FACTOR A6B,heat shock transcription factor A6B
A.thaliana TAIR10	AT5G10220 - annexin 6,ANNEXIN ARABIDOPSIS THALIANA 6
A.thaliana TAIR10	AT1G30040 - gibberellin 2-oxidase,GIBBERELLIN 2-OXIDASE 2
A.thaliana TAIR10	AT5G21170 - 5'-AMP-activated protein kinase beta-2 subunit protein
A.thaliana TAIR10	AT3G44110 - DNAJ homologue 3
A.thaliana TAIR10	AT3G25710 - basic helix-loop-helix 32,TARGET OF MONOPTEROS 5
A.thaliana TAIR10	AT5G53470 - ACYL-COA BINDING PROTEIN,acyl-CoA binding protein 1
A.thaliana TAIR10	AT1G59900 - pyruvate dehydrogenase complex E1 alpha subunit
A.thaliana TAIR10	AT5G07480 - KAR-UP oxidoreductase 1
A.thaliana TAIR10	AT5G01220 - sulfoquinovosyldiacylglycerol 2
A.thaliana TAIR10	AT4G39680 - SAP domain-containing protein
A.thaliana TAIR10	AT3G05727 - S locus-related glycoprotein 1 (SLR1) binding pollen coat protein family
A.thaliana TAIR10	AT1G61070 - low-molecular-weight cysteine-rich 66,PLANT DEFENSIN 2.4
A.thaliana TAIR10	AT5G12290 - dgd1 suppressor 1,DGD1 SUPPRESSOR 1
A.thaliana TAIR10	AT5G41700 - ARABIDOPSIS THALIANA UBIQUITIN CONJUGATING ENZYME 8,ubiquitin conjugating enzyme 8
A.thaliana TAIR10	AT3G04290 - Li-tolerant lipase 1
A.thaliana TAIR10	AT5G57330 - Galactose mutarotase-like superfamily protein
A.thaliana TAIR10	AT1G48000 - myb domain protein 112
A.thaliana TAIR10	AT2G01890 - purple acid phosphatase 8,PURPLE ACID PHOSPHATASE 8
A.thaliana TAIR10	AT2G44110 - MILDEW RESISTANCE LOCUS O 15,Seven transmembrane MLO family protein
A.thaliana TAIR10	AT4G36430 - Peroxidase superfamily protein
A.thaliana TAIR10	AT2G01530 - MLP-like protein 329,(Zusammen-CA)-enhanced 2
A.thaliana TAIR10	AT1G61180 - LRR and NB-ARC domains-containing disease resistance protein
A.thaliana TAIR10	AT3G16500 - indole-3-acetic acid inducible 26,phytochrome-associated protein 1
A.thaliana TAIR10	AT3G51310 - VPS35 homolog C
A.thaliana TAIR10	AT3G11240 - ABNORMAL TRACHEARY ELEMENT FORMATION-RELATED GENE EXPRESSION 2,arginine-tRNA protein transferase 2
A.thaliana TAIR10	AT1G60430 - actin-related protein C3
A.thaliana TAIR10	AT3G58810 - ARABIDOPSIS METAL TOLERANCE PROTEIN 3,METAL TOLERANCE PROTEIN 3,metal tolerance protein A2
A.thaliana TAIR10	AT4G00940 - DNA binding with one finger 4.1,Dof-type zinc finger DNA-binding family protein,INTERCELLULAR TRAFFICKING DOF 1
A.thaliana TAIR10	AT5G23630 - MALE GAMETOGENESIS IMPAIRED ANTHERS,phosphate deficiency response 2
A.thaliana TAIR10	AT3G16000 - MAR binding filament-like protein 1
A.thaliana TAIR10	AT5G55450 - Bifunctional inhibitor/lipid-transfer protein/seed storage 2S albumin superfamily protein
A.thaliana TAIR10	AT3G20490
A.thaliana TAIR10	AT1G32763 - Cysteine-rich protein
A.thaliana TAIR10	AT5G09240 - ssDNA-binding transcriptional regulator
A.thaliana TAIR10	AT3G08690 - ubiquitin-conjugating enzyme 11
A.thaliana TAIR10	AT1G67600 - Acid phosphatase/vanadium-dependent haloperoxidase-related protein
A.thaliana TAIR10	AT3G61380 - Phosphatidylinositol N-acetyglucosaminlytransferase subunit P-related,TON1 Recruiting Motif 14
A.thaliana TAIR10	AT5G23150 - ENHANCER OF AG-4 2,Tudor/PWWP/MBT domain-containing protein
A.thaliana TAIR10	AT5G46700 - TETRASPANIN 1,Tetraspanin family protein,TORNADO 2
A.thaliana TAIR10	AT4G37840 - hexokinase-like 3
A.thaliana TAIR10	AT1G66350 - RGA-like 1
A.thaliana TAIR10	AT1G68050 - \"flavin-binding, kelch repeat, f box 1\,flavin-binding, kelch repeat, f box 1
A.thaliana TAIR10	AT2G46070 - mitogen-activated protein kinase 12
A.thaliana TAIR10	AT5G05580 - fatty acid desaturase 8
A.thaliana TAIR10	AT1G51500 - ABC-2 type transporter family protein,ARABIDOPSIS THALIANA WHITE-BROWN COMPLEX 12,ATP-binding cassette G12,ECERIFERUM 5,WHITE-BROWN COMPLEX 12
A.thaliana TAIR10	AT1G63030 - DWARF AND DELAYED FLOWERING 2,Integrase-type DNA-binding superfamily protein
A.thaliana TAIR10	AT1G20980 - squamosa promoter binding protein-like 14,SQUAMOSA PROMOTER BINDING PROTEIN-LIKE 14
A.thaliana TAIR10	AT4G27410 - Arabidopsis NAC domain containing protein 72,NAC (No Apical Meristem) domain transcriptional regulator superfamily protein,RESPONSIVE TO DESICCATION 26
A.thaliana TAIR10	AT4G17690 - Peroxidase superfamily protein
A.thaliana TAIR10	AT2G37640 - ARABIDOPSIS THALIANA EXPANSIN A3,Barwin-like endoglucanases superfamily protein,EXPANSIN 3,EXPANSIN3
A.thaliana TAIR10	AT5G52310 - COLD REGULATED 78,LOW-TEMPERATURE-INDUCED 78,low-temperature-responsive protein 78 (LTI78) / desiccation-responsive protein 29A (RD29A),RESPONSIVE TO DESICCATION 29A
A.thaliana TAIR10	AT4G22790 - MATE efflux family protein,RESISTANT TO HIGH CO2
A.thaliana TAIR10	AT1G33600 - Leucine-rich repeat (LRR) family protein
A.thaliana TAIR10	AT4G24250 - MILDEW RESISTANCE LOCUS O 13,Seven transmembrane MLO family protein
A.thaliana TAIR10	AT1G18250 - Pathogenesis-related thaumatin superfamily protein
A.thaliana TAIR10	AT3G53480 - ATP-binding cassette G37,pleiotropic drug resistance 9,PLEIOTROPIC DRUG RESISTANCE 9,polar auxin transport inhibitor sensitive 1
A.thaliana TAIR10	AT3G55580 - Regulator of chromosome condensation (RCC1) family protein,Tolerant to Chilling and Freezing1
A.thaliana TAIR10	AT2G31060 - elongation factor family protein,EMBRYO DEFECTIVE 2785
A.thaliana TAIR10	AT5G41070 - dsRNA-binding protein 5
A.thaliana TAIR10	AT2G17120 - CEBiP-like 1,LysM-containing receptor protein 1,lysm domain GPI-anchored protein 2 precursor,lysM domain GPI-anchored protein 2 precursor
A.thaliana TAIR10	AT5G54800 - ARABIDOPSIS GLUCOSE 6-PHOSPHATE/PHOSPHATE TRANSLOCATOR 1,glucose 6-phosphate/phosphate translocator 1
A.thaliana TAIR10	AT2G18170 - MAP kinase 7
A.thaliana TAIR10	AT2G31470 - DROUGHT TOLERANCE REPRESSOR,F-box and associated interaction domains-containing protein
A.thaliana TAIR10	AT1G70200 - HIGH PHOTOSYNTHETIC EFFICIENCY 1,RNA-binding (RRM/RBD/RNP motifs) family protein
A.thaliana TAIR10	AT1G59940 - response regulator 3
A.thaliana TAIR10	AT4G11920 - cell cycle switch protein 52 A2,FIZZY-RELATED 1
A.thaliana TAIR10	AT3G04740 - ARABIDOPSIS MEDIATOR COMPONENTS 14,MEDIATOR COMPONENTS 14,RNA polymerase II transcription mediators,STRUWWELPETER
A.thaliana TAIR10	AT1G01360 - PYRABACTIN RESISTANCE 1-LIKE 9,regulatory component of ABA receptor 1
A.thaliana TAIR10	AT2G39450 - Cation efflux family protein
A.thaliana TAIR10	AT1G35720 - annexin 1
A.thaliana TAIR10	AT2G20510 - translocase inner membrane subunit 44-1
A.thaliana TAIR10	AT1G15930 - Ribosomal protein L7Ae/L30e/S12e/Gadd45 family protein
A.thaliana TAIR10	AT5G51820 - ARABIDOPSIS THALIANA PHOSPHOGLUCOMUTASE,phosphoglucomutase,STARCH-FREE 1
A.thaliana TAIR10	AT4G29860 - ALUMINUM TOLERANT 2,DECREASED SIZE EXCLUSION LIMIT 1,EMBRYO DEFECTIVE 2757,TANMEI,Transducin/WD40 repeat-like superfamily protein
A.thaliana TAIR10	AT5G28660 - NHL domain-containing protein
A.thaliana TAIR10	AT3G52800 - A20/AN1-like zinc finger family protein
A.thaliana TAIR10	AT3G62770 - autophagy 18a,PEROXISOME UNUSUAL POSITIONING 2,Transducin/WD40 repeat-like superfamily protein
A.thaliana TAIR10	AT1G03630 - protochlorophyllide oxidoreductase C
A.thaliana TAIR10	AT3G46710 - NB-ARC domain-containing disease resistance protein
A.thaliana TAIR10	AT1G62640 - 3-ketoacyl-acyl carrier protein synthase III
A.thaliana TAIR10	AT5G47280 - ADR1-like 3
A.thaliana TAIR10	AT5G56150 - ubiquitin-conjugating enzyme 30
A.thaliana TAIR10	AT2G33230 - YUCCA 7
A.thaliana TAIR10	AT4G15910 - drought-induced 21
A.thaliana TAIR10	AT4G37295
A.thaliana TAIR10	AT1G09780 - 2,3-biphosphoglycerate-independent phosphoglycerate mutase 1,Phosphoglycerate mutase, 2,3-bisphosphoglycerate-independent
A.thaliana TAIR10	AT4G12490 - Bifunctional inhibitor/lipid-transfer protein/seed storage 2S albumin superfamily protein
A.thaliana TAIR10	AT1G51350 - ARM repeat superfamily protein
A.thaliana TAIR10	AT5G07100 - WRKY DNA-binding protein 26
A.thaliana TAIR10	AT1G80340 - ARABIDOPSIS THALIANA GIBBERELLIN-3-OXIDASE 2,gibberellin 3-oxidase 2
A.thaliana TAIR10	AT2G17730 - NEP-interacting protein 2
A.thaliana TAIR10	AT1G24620 - CALMODULIN LIKE 25,EF hand calcium-binding protein family
A.thaliana TAIR10	AT3G08580 - ADP/ATP carrier 1
A.thaliana TAIR10	AT3G01720 - (1 of 1) PTHR31485:SF7 - PEPTIDYL SERINE ALPHA-GALACTOSYLTRANSFERASE
A.thaliana TAIR10	AT5G03160 - homolog of mamallian P58IPK
A.thaliana TAIR10	AT2G35730 - Heavy metal transport/detoxification superfamily protein
A.thaliana TAIR10	AT2G40700 - P-loop containing nucleoside triphosphate hydrolases superfamily protein
A.thaliana TAIR10	AT5G57670 - Protein kinase superfamily protein
A.thaliana TAIR10	AT1G02920 - ARABIDOPSIS GLUTATHIONE S-TRANSFERASE 11,GLUTATHIONE S-TRANSFERASE 11,glutathione S-transferase 7
A.thaliana TAIR10	AT3G28200 - Peroxidase superfamily protein
A.thaliana TAIR10	AT5G07330 - (1 of 1) PTHR33919:SF11 - EXPRESSED PROTEIN
A.thaliana TAIR10	AT3G51910 - ARABIDOPSIS THALIANA HEAT SHOCK TRANSCRIPTION FACTOR A7A,heat shock transcription factor A7A
A.thaliana TAIR10	AT1G52890 - NAC domain containing protein 19
A.thaliana TAIR10	AT4G17520 - Hyaluronan / mRNA binding family
A.thaliana TAIR10	AT2G13790 - BAK1-LIKE 1,BRI1- ASSOCIATED KINASE 7,somatic embryogenesis receptor-like kinase 4,SOMATIC EMBRYOGENESIS RECEPTOR-LIKE KINASE 4
A.thaliana TAIR10	AT3G60830 - actin-related protein 7
A.thaliana TAIR10	AT2G19310 - HSP20-like chaperones superfamily protein
A.thaliana TAIR10	AT3G16770 - ETHYLENE RESPONSE FACTOR 72,ethylene-responsive element binding protein,RELATED TO AP2 3
A.thaliana TAIR10	AT5G04540 - myotubularin 2,Myotubularin-like phosphatases II superfamily
A.thaliana TAIR10	AT2G16980 - Major facilitator superfamily protein
A.thaliana TAIR10	AT5G46830 - NACL-inducible gene 1,NACL-INDUCIBLE GENE 1
A.thaliana TAIR10	AT5G08390 - Transducin/WD40 repeat-like superfamily protein
A.thaliana TAIR10	AT2G14580 - basic pathogenesis-related protein 1
A.thaliana TAIR10	AT5G25250 - flotillin 1,SPFH/Band 7/PHB domain-containing membrane-associated protein family
A.thaliana TAIR10	AT4G37590 - MAB4/ENP/NPY1-LIKE 1,NAKED PINS IN YUC MUTANTS 5,Phototropic-responsive NPH3 family protein
A.thaliana TAIR10	AT1G33240 - GT-2-like 1,GT2-LIKE 1
A.thaliana TAIR10	AT5G26680 - 5'-3' exonuclease family protein,Flap Endonuclease I,SHADE AVOIDANCE 6
A.thaliana TAIR10	AT3G28940 - AIG2-like (avirulence induced gene) family protein
A.thaliana TAIR10	AT1G03740 - Protein kinase superfamily protein
A.thaliana TAIR10	AT4G38500 - Protein of unknown function (DUF616)
A.thaliana TAIR10	AT5G39040 - ALUMINUM SENSITIVE 1,ARABIDOPSIS THALIANA TRANSPORTER ASSOCIATED WITH ANTIGEN PROCESSING PROTEIN 2,ATP-binding cassette B27,transporter associated with antigen processing protein 2
A.thaliana TAIR10	AT2G45280 - RAS associated with diabetes protein 51C
A.thaliana TAIR10	AT5G05170 - CELLULOSE SYNTHASE 3,Cellulose synthase family protein,CONSTITUTIVE EXPRESSION OF VSP 1,ECTOPIC LIGNIFICATION 1,ISOXABEN RESISTANT 1,multiple response expansion 1
A.thaliana TAIR10	AT1G21910 - dehydration response element-binding protein 26,Integrase-type DNA-binding superfamily protein
A.thaliana TAIR10	AT4G23850 - AMP-dependent synthetase and ligase family protein,long-chain acyl-CoA synthetase 4
A.thaliana TAIR10	AT5G48300 - ADP glucose pyrophosphorylase 1,ADP-GLUCOSE PYROPHOSPHORYLASE SMALL SUBUNIT 1
A.thaliana TAIR10	AT2G17260 - glutamate receptor 2
A.thaliana TAIR10	AT1G05710 - basic helix-loop-helix (bHLH) DNA-binding superfamily protein
A.thaliana TAIR10	AT5G13580 - ABC-2 type transporter family protein,ATP-binding cassette G6
A.thaliana TAIR10	AT3G24220 - nine-cis-epoxycarotenoid dioxygenase 6,NINE-CIS-EPOXYCAROTENOID DIOXYGENASE 6
A.thaliana TAIR10	AT2G18040 - peptidylprolyl cis/trans isomerase, NIMA-interacting 1
A.thaliana TAIR10	AT4G03550 - enhancer of edr1 3,glucan synthase-like 5,GLUCAN SYNTHASE-LIKE 5,POWDERY MILDEW RESISTANT 4
A.thaliana TAIR10	AT5G17490 - RGA-like protein 3
A.thaliana TAIR10	AT2G22850 - basic leucine-zipper 6
A.thaliana TAIR10	AT5G65670 - indole-3-acetic acid inducible 9
A.thaliana TAIR10	AT1G55805 - BolA-like family protein,homolog of E.coli BolA 1,homolog of E.coli BolA 2
A.thaliana TAIR10	AT3G24140 - basic helix-loop-helix (bHLH) DNA-binding superfamily protein,FAMA
A.thaliana TAIR10	AT5G17640 - Abiotic Stress Gene 1,Protein of unknown function (DUF1005)
A.thaliana TAIR10	AT2G44810 - alpha/beta-Hydrolases superfamily protein,DEFECTIVE ANTHER DEHISCENCE 1
A.thaliana TAIR10	AT1G02310 - endo-beta-mannanase 1,Glycosyl hydrolase superfamily protein
A.thaliana TAIR10	AT5G18100 - copper/zinc superoxide dismutase 3
A.thaliana TAIR10	AT2G42620 - MORE AXILLARY BRANCHES 2,ORESARA 9,PLEIOTROPIC PHOTOSIGNALING,RNI-like superfamily protein
A.thaliana TAIR10	AT5G43730 - Disease resistance protein (CC-NBS-LRR class) family,Resistance Silenced Gene 2
A.thaliana TAIR10	AT2G39810 - EARLY IN SHORT DAYS 6,HIGH EXPRESSION OF OSMOTICALLY RESPONSIVE GENES 1,ubiquitin-protein ligases
A.thaliana TAIR10	AT3G45410 - Concanavalin A-like lectin protein kinase family protein,L-type lectin receptor kinase I.3
A.thaliana TAIR10	AT1G07720 - 3-ketoacyl-CoA synthase 3
A.thaliana TAIR10	AT1G53070 - Legume lectin family protein
A.thaliana TAIR10	AT2G47510 - fumarase 1
A.thaliana TAIR10	AT5G26310 - UDP-Glycosyltransferase superfamily protein
A.thaliana TAIR10	AT3G57870 - EMBRYO DEFECTIVE 1637,SUMO CONJUGATING ENZYME 1A,sumo conjugation enzyme 1,SUMO CONJUGATION ENZYME 1
A.thaliana TAIR10	AT1G76190 - SAUR-like auxin-responsive protein family,SMALL AUXIN UPREGULATED RNA 56
A.thaliana TAIR10	AT2G21660 - \"cold, circadian rhythm, and rna binding 2\,cold, circadian rhythm, and rna binding 2,GLYCINE RICH PROTEIN 7,GLYCINE-RICH RNA-BINDING PROTEIN 7,RNA-binding glycine-rich protein A3
A.thaliana TAIR10	AT5G60600 - 4-hydroxy-3-methylbut-2-enyl diphosphate synthase,CHLOROPLAST BIOGENESIS 4,CONSTITUTIVE SUBTILISIN 3
A.thaliana TAIR10	AT1G73030 - CHARGED MULTIVESICULAR BODY PROTEIN/CHROMATIN MODIFYING PROTEIN1A,SNF7 family protein
A.thaliana TAIR10	AT3G04790 - EMBRYO DEFECTIVE 3119,Ribose 5-phosphate isomerase, type A protein
A.thaliana TAIR10	AT2G28420 - glyoxylase I 8,Lactoylglutathione lyase / glyoxalase I family protein
A.thaliana TAIR10	AT2G27050 - ETHYLENE-INSENSITIVE3-like 1
A.thaliana TAIR10	AT2G46530 - auxin response factor 11
A.thaliana TAIR10	AT3G09940 - monodehydroascorbate reductase,MONODEHYDROASCORBATE REDUCTASE 3
A.thaliana TAIR10	AT1G31470 - Major facilitator superfamily protein,NUCLEAR FUSION DEFECTIVE 4
A.thaliana TAIR10	AT2G29750 - UDP-glucosyl transferase 71C1
A.thaliana TAIR10	AT5G66070 - RING/U-box superfamily protein
A.thaliana TAIR10	AT1G48470 - glutamine synthetase 1;5
A.thaliana TAIR10	AT4G09140 - ARABIDOPSIS THALIANA MUTL-HOMOLOGUE 1,MUTL-homologue 1
A.thaliana TAIR10	AT2G05990 - ENOYL-ACP REDUCTASE 1,MOSAIC DEATH 1,NAD(P)-binding Rossmann-fold superfamily protein
A.thaliana TAIR10	AT1G17380 - jasmonate-zim-domain protein 5
A.thaliana TAIR10	AT3G19820 - CABBAGE 1,cell elongation protein / DWARF1 / DIMINUTO (DIM),DIMINUTIA,DIMINUTO 1,DWARF 1,ENHANCED VERY-LOW-FLUENCE RESPONSES 1
A.thaliana TAIR10	AT5G53890 - phytosylfokine-alpha receptor 2
A.thaliana TAIR10	AT3G48060 - BAH domain ;TFIIS helical bundle-like domain
A.thaliana TAIR10	AT1G29280 - WRKY DNA-binding protein 65,WRKY DNA-BINDING PROTEIN 65
A.thaliana TAIR10	AT4G22110 - GroES-like zinc-binding dehydrogenase family protein
A.thaliana TAIR10	AT1G53280 - Class I glutamine amidotransferase-like superfamily protein,DJ-1 homolog B
A.thaliana TAIR10	AT5G11260 - Basic-leucine zipper (bZIP) transcription factor family protein,ELONGATED HYPOCOTYL 5,REVERSAL OF THE DET PHENOTYPE 5
A.thaliana TAIR10	AT3G60750 - Transketolase,transketolase 1
A.thaliana TAIR10	AT1G04120 - Arabidopsis thaliana ATP-binding cassette C5,ATP-binding cassette C5,multidrug resistance-associated protein 5,MULTIDRUG RESISTANCE PROTEIN 5
A.thaliana TAIR10	AT4G19230 - \"cytochrome P450, family 707, subfamily A, polypeptide 1\,cytochrome P450, family 707, subfamily A, polypeptide 1
A.thaliana TAIR10	AT4G23270 - cysteine-rich RLK (RECEPTOR-like protein kinase) 19
A.thaliana TAIR10	AT5G44580
A.thaliana TAIR10	AT1G18980 - RmlC-like cupins superfamily protein
A.thaliana TAIR10	AT2G01150 - RING-H2 finger protein 2B
A.thaliana TAIR10	AT1G08550 - ARABIDOPSIS VIOLAXANTHIN DE-EPOXIDASE 1,non-photochemical quenching 1
A.thaliana TAIR10	AT4G13880 - receptor like protein 48
A.thaliana TAIR10	AT5G05440 - Polyketide cyclase/dehydrase and lipid transport superfamily protein,PYRABACTIN RESISTANCE 1-LIKE 5,regulatory component of ABA receptor 8
A.thaliana TAIR10	AT3G11020 - DEHYDRATION-RESPONSIVE ELEMENT BINDING PROTEIN 2,DRE/CRT-binding protein 2B
A.thaliana TAIR10	AT3G45040 - dolichol kinase 1,EVAN,phosphatidate cytidylyltransferase family protein
A.thaliana TAIR10	AT1G51890 - Leucine-rich repeat protein kinase family protein
A.thaliana TAIR10	AT3G11440 - myb domain protein 65,MYB DOMAIN PROTEIN 65
A.thaliana TAIR10	AT1G58400 - Disease resistance protein (CC-NBS-LRR class) family
A.thaliana TAIR10	AT4G35970 - ascorbate peroxidase 5
A.thaliana TAIR10	AT1G29870 - tRNA synthetase class II (G, H, P and S) family protein
A.thaliana TAIR10	AT3G16350 - Homeodomain-like superfamily protein
A.thaliana TAIR10	AT3G04350 - Plant protein of unknown function (DUF946)
A.thaliana TAIR10	AT3G24020 - Disease resistance-responsive (dirigent-like protein) family protein
A.thaliana TAIR10	AT2G07170 - ARM repeat superfamily protein
A.thaliana TAIR10	AT5G53940 - Yippee family putative zinc-binding protein
A.thaliana TAIR10	AT2G39660 - botrytis-induced kinase1
A.thaliana TAIR10	AT1G56070 - LOW EXPRESSION OF OSMOTICALLY RESPONSIVE GENES 1,Ribosomal protein S5/Elongation factor G/III/V family protein
A.thaliana TAIR10	AT1G64990 - GPCR-type G protein 1
A.thaliana TAIR10	AT4G26870 - Class II aminoacyl-tRNA and biotin synthetases superfamily protein
A.thaliana TAIR10	AT1G21590 - Protein kinase protein with adenine nucleotide alpha hydrolases-like domain
A.thaliana TAIR10	AT4G21090 - ARABIDOPSIS MITOCHONDRIAL FERREDOXIN 2,MITOCHONDRIAL FERREDOXIN 2
A.thaliana TAIR10	AT5G62150 - peptidoglycan-binding LysM domain-containing protein
A.thaliana TAIR10	AT2G29550 - tubulin beta 7,tubulin beta-7 chain
A.thaliana TAIR10	AT2G16770 - Basic-leucine zipper (bZIP) transcription factor family protein
A.thaliana TAIR10	AT4G02600 - MILDEW RESISTANCE LOCUS O 1,Seven transmembrane MLO family protein
A.thaliana TAIR10	AT3G05880 - Low temperature and salt responsive protein family,RARE-COLD-INDUCIBLE 2A
A.thaliana TAIR10	AT4G08780 - Peroxidase superfamily protein
A.thaliana TAIR10	AT5G46210 - cullin4
A.thaliana TAIR10	AT2G37990 - ribosome biogenesis regulatory protein (RRS1) family protein
A.thaliana TAIR10	AT2G07751 - NADH:ubiquinone/plastoquinone oxidoreductase, chain 3 protein
A.thaliana TAIR10	AT1G76710 - ASH1-RELATED PROTEIN 1,SET domain group 26
A.thaliana TAIR10	AT2G25170 - chromatin remodeling factor CHD3 (PICKLE),CYTOKININ-HYPERSENSITIVE 2,ENHANCED PHOTOMORPHOGENIC 1,GYMNOS,PICKLE,SUPPRESSOR OF SLR 2
A.thaliana TAIR10	AT2G20240 - Protein of unknown function (DUF3741),TON1 Recruiting Motif 17
A.thaliana TAIR10	AT4G38900 - basic leucine-zipper 29,Basic-leucine zipper (bZIP) transcription factor family protein,DRINK ME-LIKE
A.thaliana TAIR10	AT3G21060 - RbBP5 LIKE,Transducin/WD40 repeat-like superfamily protein
A.thaliana TAIR10	AT3G47340 - ARABIDOPSIS THALIANA GLUTAMINE-DEPENDENT ASPARAGINE SYNTHASE 1,DARK INDUCIBLE 6,glutamine-dependent asparagine synthase 1
A.thaliana TAIR10	AT3G61440 - BETA-SUBSTITUTED ALA SYNTHASE 3;1,cysteine synthase C1,CYSTEINE SYNTHASE C1
A.thaliana TAIR10	AT3G07780 - OBERON1,Protein of unknown function (DUF1423)
A.thaliana TAIR10	AT5G60300 - Concanavalin A-like lectin protein kinase family protein,Does not Respond to Nucleotides 1,L-type lectin receptor kinase I.9
A.thaliana TAIR10	AT2G17880 - Chaperone DnaJ-domain superfamily protein,DNA J protein C24
A.thaliana TAIR10	AT5G50720 - ARABIDOPSIS THALIANA HVA22 HOMOLOGUE E,HVA22 homologue E
A.thaliana TAIR10	AT5G19660 - SITE-1 protease,SITE-1 PROTEASE
A.thaliana TAIR10	AT4G31760 - Peroxidase superfamily protein
A.thaliana TAIR10	AT5G19000 - BTB-POZ and MATH domain 1,BTB-POZ AND MATH DOMAIN 1
A.thaliana TAIR10	AT2G04430 - nudix hydrolase homolog 5
A.thaliana TAIR10	AT1G23030 - ARM repeat superfamily protein,Plant U-Box Protein 11
A.thaliana TAIR10	AT4G04670 - Met-10+ like family protein / kelch repeat-containing protein
A.thaliana TAIR10	AT1G75680 - glycosyl hydrolase 9B7
A.thaliana TAIR10	AT2G27710 - 60S acidic ribosomal protein family
A.thaliana TAIR10	AT5G16910 - cellulose-synthase like D2
A.thaliana TAIR10	AT5G62810 - peroxin 14,PEROXISOME DEFECTIVE 2
A.thaliana TAIR10	AT5G48570 - FKBP-type peptidyl-prolyl cis-trans isomerase family protein
A.thaliana TAIR10	AT5G09440 - EXORDIUM like 4
A.thaliana TAIR10	AT4G26180 - CoA Carrier 2,Mitochondrial substrate carrier family protein
A.thaliana TAIR10	AT2G20610 - ABERRANT LATERAL ROOT FORMATION 1,HOOKLESS 3,ROOTY,ROOTY 1,SUPERROOT 1,Tyrosine transaminase family protein
A.thaliana TAIR10	AT3G57530 - calcium-dependent protein kinase 32
A.thaliana TAIR10	AT1G43800 - FLORAL TRANSITION AT THE MERISTEM1,Plant stearoyl-acyl-carrier-protein desaturase family protein,STEAROYL-ACYL CARRIER PROTEIN &#916;9-DESATURASE6
A.thaliana TAIR10	AT5G18030 - SAUR-like auxin-responsive protein family,SMALL AUXIN UP RNA 21
A.thaliana TAIR10	AT4G19030 - NOD26-LIKE INTRINSIC PROTEIN 1;1,NOD26-like major intrinsic protein 1,NOD26-LIKE MAJOR INTRINSIC PROTEIN 1
A.thaliana TAIR10	AT3G46560 - embryo defective 2474,Tim10/DDP family zinc finger protein,TRANSLOCASE OF THE INNER MEMBRANE 9
A.thaliana TAIR10	AT1G60989 - SCR-like 7
A.thaliana TAIR10	AT1G79530 - glyceraldehyde-3-phosphate dehydrogenase of plastid 1
A.thaliana TAIR10	AT5G14790 - ARM repeat superfamily protein
A.thaliana TAIR10	AT2G22570 - A. THALIANA NICOTINAMIDASE 1,nicotinamidase 1
A.thaliana TAIR10	AT5G27320 - alpha/beta-Hydrolases superfamily protein,GA INSENSITIVE DWARF1C
A.thaliana TAIR10	AT5G04590 - sulfite reductase
A.thaliana TAIR10	AT5G44420 - LOW-MOLECULAR-WEIGHT CYSTEINE-RICH 77,plant defensin 1.2,PLANT DEFENSIN 1.2A
A.thaliana TAIR10	AT5G65165 - succinate dehydrogenase 2-3
A.thaliana TAIR10	AT1G75450 - ARABIDOPSIS THALIANA CYTOKININ OXIDASE 5,cytokinin oxidase 5,CYTOKININ OXIDASE 6
A.thaliana TAIR10	AT4G33360 - farnesol dehydrogenase,NAD(P)-binding Rossmann-fold superfamily protein
A.thaliana TAIR10	AT3G20060 - ubiquitin-conjugating enzyme19
A.thaliana TAIR10	AT5G15730 - calcium/calmodulin-regulated receptor-like kinase 2,Protein kinase superfamily protein
A.thaliana TAIR10	AT1G80600 - HOPW1-1-interacting 1,TUMOR PRONE 5
A.thaliana TAIR10	AT5G43500 - actin-related protein 9
A.thaliana TAIR10	AT4G03205 - Coproporphyrinogen III oxidase
A.thaliana TAIR10	AT5G08330 - CCA1 HIKING EXPEDITION,TCP domain protein 21,TCP family transcription factor
A.thaliana TAIR10	AT1G25390 - Leaf rust 10 disease-resistance locus receptor- like protein kinase-like 4,Protein kinase superfamily protein
A.thaliana TAIR10	AT2G24840 - AGAMOUS-like 61,DIANA
A.thaliana TAIR10	AT2G39730 - rubisco activase
A.thaliana TAIR10	AT2G19110 - ARABIDOPSIS HEAVY METAL ATPASE 4,heavy metal atpase 4
A.thaliana TAIR10	AT4G15802 - Arabidopsis thaliana heat shock factor binding protein,heat shock factor binding protein
A.thaliana TAIR10	AT5G60770 - ARABIDOPSIS THALIANA NITRATE TRANSPORTER 2.4,nitrate transporter 2.4
A.thaliana TAIR10	AT5G18830 - squamosa promoter binding protein-like 7,SQUAMOSA PROMOTER BINDING PROTEIN-LIKE 7
A.thaliana TAIR10	AT1G51830 - Leucine-rich repeat protein kinase family protein
A.thaliana TAIR10	AT1G35537 - Defensin-like (DEFL) family protein
A.thaliana TAIR10	AT1G16060 - ARIA-interacting double AP2 domain protein,WRINKLED 3
A.thaliana TAIR10	AT1G29440 - SAUR-like auxin-responsive protein family,SMALL AUXIN UP RNA 63
A.thaliana TAIR10	AT1G74920 - aldehyde dehydrogenase 10A8
A.thaliana TAIR10	AT3G61830 - auxin response factor 18
A.thaliana TAIR10	AT3G06110 - ARABIDOPSIS MAPK PHOSPHATASE 2,DUAL-SPECIFICITY PROTEIN PHOSPHATASE 1B,MAPK phosphatase 2
A.thaliana TAIR10	AT2G41130 - basic helix-loop-helix (bHLH) DNA-binding superfamily protein,salt tolerant callus 8
A.thaliana TAIR10	AT5G19315 - Defensin-like (DEFL) family protein
A.thaliana TAIR10	AT1G64195 - Defensin-like (DEFL) family protein
A.thaliana TAIR10	AT3G52960 - peroxiredoxin-II-E,Thioredoxin superfamily protein
A.thaliana TAIR10	AT3G09020 - alpha 1,4-glycosyltransferase family protein
A.thaliana TAIR10	AT4G40080 - ENTH/ANTH/VHS superfamily protein
A.thaliana TAIR10	AT4G01350 - Cysteine/Histidine-rich C1 domain family protein
A.thaliana TAIR10	AT2G14835 - RING/U-box superfamily protein
A.thaliana TAIR10	AT3G55410 - 2-oxoglutarate dehydrogenase, E1 component
A.thaliana TAIR10	AT3G12200 - NIMA-related kinase 7
A.thaliana TAIR10	AT5G27030 - TOPLESS-related 3
A.thaliana TAIR10	AT1G18590 - ARABIDOPSIS SULFOTRANSFERASE 5C,sulfotransferase 17,SULFOTRANSFERASE 17
A.thaliana TAIR10	AT5G10170 - myo-inositol-1-phosphate synthase 3,MYO-INOSITOL-1-PHOSTPATE SYNTHASE 3
A.thaliana TAIR10	AT2G06530 - SNF7 family protein
A.thaliana TAIR10	AT2G38810 - histone H2A 8
A.thaliana TAIR10	AT2G48120 - PALE CRESS,pale cress protein (PAC)
A.thaliana TAIR10	AT2G24820 - translocon at the inner envelope membrane of chloroplasts 55,translocon at the inner envelope membrane of chloroplasts 55-II
A.thaliana TAIR10	AT4G12250 - UDP-D-glucuronate 4-epimerase 5
A.thaliana TAIR10	AT4G25390 - Protein kinase superfamily protein
A.thaliana TAIR10	AT4G17260 - Lactate/malate dehydrogenase family protein
A.thaliana TAIR10	AT5G18130 - (1 of 1) PTHR33646:SF19 - GB|AAF00631.1
A.thaliana TAIR10	AT2G38240 - 2-oxoglutarate (2OG) and Fe(II)-dependent oxygenase superfamily protein
A.thaliana TAIR10	AT2G41010 - calmodulin (CAM)-binding protein of 25 kDa
A.thaliana TAIR10	AT4G35830 - aconitase 1
A.thaliana TAIR10	AT2G29500 - HSP20-like chaperones superfamily protein
A.thaliana TAIR10	AT4G37640 - calcium ATPase 2
A.thaliana TAIR10	AT5G06460 - ARABIDOPSIS THALIANA UBIQUITIN ACTIVATING ENZYME 2,ubiquitin activating enzyme 2
A.thaliana TAIR10	AT1G50490 - ubiquitin-conjugating enzyme 20
A.thaliana TAIR10	AT1G19920 - ATP SULFURYLASE ARABIDOPSIS 1,Pseudouridine synthase/archaeosine transglycosylase-like family protein
A.thaliana TAIR10	AT2G05590 - TLD-domain containing nucleolar protein
A.thaliana TAIR10	AT3G16480 - mitochondrial processing peptidase alpha subunit
A.thaliana TAIR10	AT5G01380 - Homeodomain-like superfamily protein
A.thaliana TAIR10	AT3G61050 - Calcium-dependent lipid-binding (CaLB domain) family protein,calcium-dependent lipid-binding protein
A.thaliana TAIR10	AT1G01260 - basic helix-loop-helix (bHLH) DNA-binding superfamily protein,Jasmonate Associated MYC2 LIKE 2
A.thaliana TAIR10	AT4G26540 - Leucine-rich repeat receptor-like protein kinase family protein,RGF1 INSENSITIVE 3
A.thaliana TAIR10	AT4G10340 - light harvesting complex of photosystem II 5
A.thaliana TAIR10	AT5G01270 - carboxyl-terminal domain (ctd) phosphatase-like 2
A.thaliana TAIR10	AT1G28680 - HXXXD-type acyl-transferase family protein
A.thaliana TAIR10	AT1G71697 - choline/ethanolamine kinase 1,CHOLINE KINASE,choline kinase 1
A.thaliana TAIR10	AT5G46220 - Protein of unknown function (DUF616),TurgOr regulation Defect 1
A.thaliana TAIR10	AT1G18850 - LANT-SPECIFIC COMPONENT OF THE PRE- rRNA PROCESSING COMPLEX2
A.thaliana TAIR10	AT4G29480 - Mitochondrial ATP synthase subunit G protein
A.thaliana TAIR10	AT4G14560 - AUXIN RESISTANT 5,indole-3-acetic acid inducible,indole-3-acetic acid inducible 1
A.thaliana TAIR10	AT5G12020 - 17.6 kDa class II heat shock protein
A.thaliana TAIR10	AT2G16510 - ATPase, F0/V0 complex, subunit C protein
A.thaliana TAIR10	AT2G38120 - AUXIN RESISTANT 1,MODIFIER OF ARF7/NPH4 PHENOTYPES 1,Transmembrane amino acid transporter family protein,WAVY ROOTS 5
A.thaliana TAIR10	AT4G31940 - \"cytochrome P450, family 82, subfamily C, polypeptide 4\,cytochrome P450, family 82, subfamily C, polypeptide 4
A.thaliana TAIR10	AT5G15120 - plant cysteine oxidase 1,Protein of unknown function (DUF1637)
A.thaliana TAIR10	AT2G18420 - Gibberellin-regulated family protein
A.thaliana TAIR10	AT1G66200 - glutamine synthase clone F11,glutamine synthetase 1;2
A.thaliana TAIR10	AT5G55630 - CA2+ ACTIVATED OUTWARD RECTIFYING K+ CHANNEL 1,Outward rectifying potassium channel protein,TANDEM PORE K+ CHANNEL 1,TWO PORE K CHANNEL,TWO PORE K CHANNEL 1
A.thaliana TAIR10	AT4G22950 - AGAMOUS-like 19
A.thaliana TAIR10	AT4G33630 - EXECUTER1,Protein of unknown function (DUF3506)
A.thaliana TAIR10	AT5G09660 - peroxisomal NAD-malate dehydrogenase 2
A.thaliana TAIR10	AT1G70590 - F-box family protein
A.thaliana TAIR10	AT4G34620 - small subunit ribosomal protein 16
A.thaliana TAIR10	AT5G66810 - (1 of 1) IPR006595//IPR024964 - CTLH, C-terminal LisH motif // CTLH/CRA C-terminal to LisH motif domain
A.thaliana TAIR10	AT1G72730 - DEA(D/H)-box RNA helicase family protein
A.thaliana TAIR10	AT1G48030 - mitochondrial lipoamide dehydrogenase 1
A.thaliana TAIR10	AT5G12170 - CRT (chloroquine-resistance transporter)-like transporter 3
A.thaliana TAIR10	AT3G23890 - topoisomerase II
A.thaliana TAIR10	AT5G56220 - P-loop containing nucleoside triphosphate hydrolases superfamily protein
A.thaliana TAIR10	AT1G77920 - bZIP transcription factor family protein,TGACG sequence-specific binding protein 7
A.thaliana TAIR10	AT3G05010 - candidate G-protein Coupled Receptor 2,Protein of unknown function, transmembrane-40
A.thaliana TAIR10	AT1G73500 - MAP kinase kinase 9
A.thaliana TAIR10	AT2G44840 - ethylene-responsive element binding factor 13,ETHYLENE-RESPONSIVE ELEMENT BINDING FACTOR 13
A.thaliana TAIR10	AT4G05420 - damaged DNA binding protein 1A
A.thaliana TAIR10	AT4G25730 - FtsJ-like methyltransferase family protein
A.thaliana TAIR10	AT2G35550 - basic pentacysteine 7,BASIC PENTACYSTEINE 7
A.thaliana TAIR10	AT1G27980 - dihydrosphingosine phosphate lyase
A.thaliana TAIR10	AT4G19880 - Glutathione S-transferase family protein
A.thaliana TAIR10	AT4G36030 - armadillo repeat only 3
A.thaliana TAIR10	AT4G27160 - seed storage albumin 3
A.thaliana TAIR10	AT2G36400 - growth-regulating factor 3
A.thaliana TAIR10	AT2G29630 - PYRIMIDINE REQUIRING,thiaminC
A.thaliana TAIR10	AT2G27110 - FAR1-related sequence 3
A.thaliana TAIR10	AT2G22810 - 1-aminocyclopropane-1-carboxylate synthase 4,1-AMINOCYCLOPROPANE-1-CARBOXYLIC ACID SYNTHASE POLYPEPTIDE
A.thaliana TAIR10	AT1G22885
A.thaliana TAIR10	AT1G76954 - Defensin-like (DEFL) family protein
A.thaliana TAIR10	AT1G35230 - arabinogalactan protein 5
A.thaliana TAIR10	AT5G17520 - MALTOSE EXCESS 1,ROOT CAP 1,root cap 1 (RCP1)
A.thaliana TAIR10	AT1G09700 - dsRNA-binding domain-like superfamily protein,DSRNA-BINDING PROTEIN 1,HYPONASTIC LEAVES 1
A.thaliana TAIR10	AT5G23010 - 2-ISOPROPYLMALATE SYNTHASE 3,methylthioalkylmalate synthase 1
A.thaliana TAIR10	AT2G01930 - basic pentacysteine1,BASIC PENTACYSTEINE1
A.thaliana TAIR10	AT1G77770 - Protein of unknown function (DUF1644)
A.thaliana TAIR10	AT1G16540 - ABA DEFICIENT 3,ALTERED CHLOROPLAST IMPORT 2,LOW OSMOTIC STRESS 5,molybdenum cofactor sulfurase (LOS5) (ABA3),SIRTINOL RESISTANT 3
A.thaliana TAIR10	AT5G20850 - RAS associated with diabetes protein 51
A.thaliana TAIR10	AT1G70520 - ALTERED SEED GERMINATION 6,cysteine-rich RLK (RECEPTOR-like protein kinase) 2
A.thaliana TAIR10	AT1G79040 - photosystem II subunit R
A.thaliana TAIR10	AT5G04380 - S-adenosyl-L-methionine-dependent methyltransferases superfamily protein
A.thaliana TAIR10	AT5G12840 - EMBRYO DEFECTIVE 2220,\"nuclear factor Y, subunit A1\,nuclear factor Y subunit A1,nuclear factor Y, subunit A1
A.thaliana TAIR10	ATCG00780 - ribosomal protein L14
A.thaliana TAIR10	AT1G34000 - one-helix protein 2
A.thaliana TAIR10	AT3G22400 - Arabidopsis thaliana lipoxygenase 5,PLAT/LH2 domain-containing lipoxygenase family protein
A.thaliana TAIR10	AT3G50470 - homolog of RPW8 3,INTRACELLULAR MILDEW A 10
A.thaliana TAIR10	AT5G02290 - Protein kinase superfamily protein
A.thaliana TAIR10	AT5G57910 - (1 of 1) IPR036002 - Stathmin superfamily
A.thaliana TAIR10	AT2G25620 - DNA-binding protein phosphatase 1
A.thaliana TAIR10	AT4G17560 - Ribosomal protein L19 family protein
A.thaliana TAIR10	AT5G60550 - geminivirus rep interacting kinase 2
A.thaliana TAIR10	AT3G08790 - ENTH/VHS/GAT family protein
A.thaliana TAIR10	AT4G02530 - chloroplast thylakoid lumen protein
A.thaliana TAIR10	AT1G60220 - OVERLY TOLERANT TO SALT 1,UB-like protease 1D
A.thaliana TAIR10	AT1G67680 - SRP72 RNA-binding domain
A.thaliana TAIR10	AT5G37680 - ADP-ribosylation factor-like A1A
A.thaliana TAIR10	AT3G25020 - receptor like protein 42,response to Botrytis polygalacturonases 1
A.thaliana TAIR10	ATCG00740 - RNA polymerase subunit alpha
A.thaliana TAIR10	AT1G03010 - Phototropic-responsive NPH3 family protein
A.thaliana TAIR10	AT1G75800 - Pathogenesis-related thaumatin superfamily protein
A.thaliana TAIR10	AT1G21310 - extensin 3,ROOT-SHOOT-HYPOCOTYL DEFECTIVE
A.thaliana TAIR10	AT1G27390 - translocase outer membrane 20-2
A.thaliana TAIR10	AT5G52020 - Integrase-type DNA-binding superfamily protein
A.thaliana TAIR10	AT3G50760 - galacturonosyltransferase-like 2
A.thaliana TAIR10	AT4G36180 - Leucine-rich receptor-like protein kinase family protein
A.thaliana TAIR10	AT5G24620 - Pathogenesis-related thaumatin superfamily protein
A.thaliana TAIR10	AT2G46880 - purple acid phosphatase 14
A.thaliana TAIR10	AT4G21680 - NITRATE TRANSPORTER 1.8,NRT1/ PTR family 7.2
A.thaliana TAIR10	AT3G29180 - Protein of unknown function (DUF1336)
A.thaliana TAIR10	AT4G31990 - aspartate aminotransferase 5,ASPARTATE AMINOTRANSFERASE DEFICIENT 3
A.thaliana TAIR10	AT1G06000 - UDP-Glycosyltransferase superfamily protein
A.thaliana TAIR10	AT5G53310 - myosin heavy chain-related
A.thaliana TAIR10	AT2G40765
A.thaliana TAIR10	AT3G56580 - RING/U-box superfamily protein,RING Zinc Finger 1
A.thaliana TAIR10	AT2G24765 - ADP-ribosylation factor 3,ARF-LIKE 1
A.thaliana TAIR10	AT1G70670 - Arabidopsis thaliana caleosin 4,caleosin 4,Caleosin-related family protein,peroxygenase 4
A.thaliana TAIR10	AT3G19930 - sugar transporter 4,SUGAR TRANSPORTER 4
A.thaliana TAIR10	AT1G43690 - ubiquitin interaction motif-containing protein
A.thaliana TAIR10	AT1G61688 - Defensin-like (DEFL) family protein
A.thaliana TAIR10	AT5G54230 - myb domain protein 49
A.thaliana TAIR10	AT1G34510 - Peroxidase superfamily protein
A.thaliana TAIR10	AT5G38330 - low-molecular-weight cysteine-rich 80
A.thaliana TAIR10	AT5G65380 - MATE efflux family protein
A.thaliana TAIR10	AT2G23310 - Rer1 family protein
A.thaliana TAIR10	AT5G01090 - Concanavalin A-like lectin family protein
A.thaliana TAIR10	AT4G12390 - pectin methylesterase inhibitor 1
A.thaliana TAIR10	AT1G19610 - Arabidopsis defensin-like protein,LOW-MOLECULAR-WEIGHT CYSTEINE-RICH 78
A.thaliana TAIR10	AT4G24220 - &#916;4,5-steroid-5[beta]-reductase,NAD(P)-binding Rossmann-fold superfamily protein,VEIN PATTERNING 1
A.thaliana TAIR10	AT5G53250 - arabinogalactan protein 22,ARABINOGALACTAN PROTEIN 22
A.thaliana TAIR10	AT1G19180 - jasmonate-zim-domain protein 1
A.thaliana TAIR10	AT3G10420 - P-loop containing nucleoside triphosphate hydrolases superfamily protein,SEEDLING PLASTID DEVELOPMENT 1
A.thaliana TAIR10	AT5G24860 - ARABIDOPSIS FLOWERING PROMOTING FACTOR 1,flowering promoting factor 1,FLOWERING PROMOTING FACTOR 1
A.thaliana TAIR10	AT4G35000 - ascorbate peroxidase 3
A.thaliana TAIR10	AT1G58330 - transcription factor-related
A.thaliana TAIR10	AT4G24820 - 26S proteasome, regulatory subunit Rpn7;Proteasome component (PCI) domain
A.thaliana TAIR10	AT1G07400 - HSP20-like chaperones superfamily protein
A.thaliana TAIR10	AT1G30500 - \"nuclear factor Y, subunit A7\,nuclear factor Y, subunit A7
A.thaliana TAIR10	AT5G51070 - Clp ATPase,EARLY RESPONSIVE TO DEHYDRATION 1,SENESCENCE ASSOCIATED GENE 15
A.thaliana TAIR10	AT5G51020 - constitutive activator of AAA-ATPase,crumpled leaf,CRUMPLED LEAF
A.thaliana TAIR10	AT1G15780 - MEDIATOR 15_1,Non-Recognition-of-BTH 4
A.thaliana TAIR10	AT1G16130 - wall associated kinase-like 2
A.thaliana TAIR10	AT3G12400 - Ubiquitin-conjugating enzyme/RWD-like protein,Vacuolar protein sorting 23A
A.thaliana TAIR10	AT2G17630 - phosphoserine aminotransferase 2,Pyridoxal phosphate (PLP)-dependent transferases superfamily protein
A.thaliana TAIR10	AT3G61350 - SKP1 interacting partner 4
A.thaliana TAIR10	AT4G19150 - Ankyrin repeat family protein
A.thaliana TAIR10	AT1G65930 - cytosolic NADP+-dependent isocitrate dehydrogenase
A.thaliana TAIR10	AT3G18470 - PLAC8 family protein
A.thaliana TAIR10	AT3G02870 - Inositol monophosphatase family protein
A.thaliana TAIR10	AT1G23020 - ferric reduction oxidase 3,FERRIC REDUCTION OXIDASE 3
A.thaliana TAIR10	AT1G34410 - auxin response factor 21
A.thaliana TAIR10	AT5G63770 - diacylglycerol kinase 2
A.thaliana TAIR10	AT4G24520 - AAL-TOXIN RESISTANT 1,ARABIDOPSIS CYTOCHROME REDUCTASE,P450 reductase 1
A.thaliana TAIR10	AT1G63010 - Major Facilitator Superfamily with SPX (SYG1/Pho81/XPR1) domain-containing protein,Vacuolar Phosphate Transporter 1
A.thaliana TAIR10	AT4G38620 - myb domain protein 4
A.thaliana TAIR10	AT5G15830 - basic leucine-zipper 3
A.thaliana TAIR10	AT4G26500 - ARABIDOPSIS THALIANA SULFUR E,chloroplast sulfur E,homolog of E.coli BolA 1,MBRYO DEFECTIVE 1374,SULFUR E 1
A.thaliana TAIR10	AT4G32690 - ARABIDOPSIS HEMOGLOBIN 3,hemoglobin 3
A.thaliana TAIR10	AT3G53180 - glutamate-ammonia ligases;catalytics;glutamate-ammonia ligases,nodulin/glutamine synthase-like protein
A.thaliana TAIR10	AT3G18490 - ASPARTIC PROTEASE IN GUARD CELL 1,Eukaryotic aspartyl protease family protein
A.thaliana TAIR10	AT1G15100 - RING-H2 finger A2A
A.thaliana TAIR10	AT1G73360 - ENHANCED DROUGHT TOLERANCE 1,homeodomain GLABROUS 11,HOMEODOMAIN GLABROUS 11
A.thaliana TAIR10	AT1G10570 - Cysteine proteinases superfamily protein,OVERLY TOLERANT TO SALT 2,UB-LIKE PROTEASE 1C
A.thaliana TAIR10	AT1G29250 - Alba DNA/RNA-binding protein
A.thaliana TAIR10	AT4G17620 - glycine-rich protein
A.thaliana TAIR10	AT1G80840 - WRKY DNA-binding protein 40
A.thaliana TAIR10	AT5G19330 - ARM repeat protein interacting with ABF2
A.thaliana TAIR10	AT4G37490 - CYCLIN 1,CYCLIN B1;1
A.thaliana TAIR10	AT3G07180 - GPI transamidase component PIG-S-related
A.thaliana TAIR10	AT4G13280 - terpenoid synthase 12
A.thaliana TAIR10	AT5G03760 - CELLULOSE SYNTHASE LIKE A9,Nucleotide-diphospho-sugar transferases superfamily protein,RESISTANT TO AGROBACTERIUM TRANSFORMATION 4
A.thaliana TAIR10	AT5G14740 - BETA CARBONIC ANHYDRASE 2,CARBONIC ANHYDRASE 18,carbonic anhydrase 2
A.thaliana TAIR10	AT2G36910 - ARABIDOPSIS THALIANA P GLYCOPROTEIN1,ATP-binding cassette B1,ATP binding cassette subfamily B1,P-GLYCOPROTEIN 1
A.thaliana TAIR10	AT1G12200 - Flavin-binding monooxygenase family protein,flavin monooxygenase
A.thaliana TAIR10	AT2G16760 - Calcium-dependent phosphotriesterase superfamily protein
A.thaliana TAIR10	AT4G27830 - beta glucosidase 10
A.thaliana TAIR10	AT3G57660 - nuclear RNA polymerase A1
A.thaliana TAIR10	AT2G32660 - receptor like protein 22
A.thaliana TAIR10	AT2G02500 - 2-C-METHYL-D-ERYTHRITOL 4-PHOSPHATE CYTIDYLTRANSFERASE,Nucleotide-diphospho-sugar transferases superfamily protein
A.thaliana TAIR10	AT5G35590 - proteasome alpha subunit A1
A.thaliana TAIR10	AT5G22890 - C2H2 and C2HC zinc fingers superfamily protein,sensitive to proton rhizotoxicity 2
A.thaliana TAIR10	AT1G67690 - plant-specific protein of M3 family,Zincin-like metalloproteases family protein
A.thaliana TAIR10	AT4G17650 - Polyketide cyclase / dehydrase and lipid transport protein
A.thaliana TAIR10	AT2G02560 - cullin-associated and neddylation dissociated,CULLIN-ASSOCIATED AND NEDDYLATION DISSOCIATED 1,HEMIVENATA
A.thaliana TAIR10	AT5G17380 - Thiamine pyrophosphate dependent pyruvate decarboxylase family protein
A.thaliana TAIR10	AT1G29900 - carbamoyl phosphate synthetase B,VENOSA 3
A.thaliana TAIR10	AT5G24300 - Glycogen/starch synthases, ADP-glucose type,starch synthase 1,STARCH SYNTHASE 1
A.thaliana TAIR10	AT5G37780 - calmodulin 1,CARBOHYDRATE ACCUMULATION MUTANT 1,TOUCH 1
A.thaliana TAIR10	AT1G13540 - Protein of unknown function (DUF1262)
A.thaliana TAIR10	AT5G01600 - ARABIDOPSIS THALIANA FERRETIN 1,ferretin 1
A.thaliana TAIR10	AT4G39330 - cinnamyl alcohol dehydrogenase 9
A.thaliana TAIR10	AT3G26450 - Polyketide cyclase/dehydrase and lipid transport superfamily protein
A.thaliana TAIR10	AT5G47180 - Plant VAMP (vesicle-associated membrane protein) family protein
A.thaliana TAIR10	AT5G57380 - Fibronectin type III domain-containing protein,VERNALIZATION INSENSITIVE 3
A.thaliana TAIR10	AT5G40090 - CHS1-like 1,Disease resistance protein (TIR-NBS class)
A.thaliana TAIR10	AT5G14940 - Major facilitator superfamily protein
A.thaliana TAIR10	AT5G17220 - ARABIDOPSIS THALIANA GLUTATHIONE S-TRANSFERASE PHI 12,GLUTATHIONE S-TRANSFERASE 26,glutathione S-transferase phi 12,TRANSPARENT TESTA 19
A.thaliana TAIR10	AT2G21045 - High arsenic content 1,Rhodanese/Cell cycle control phosphatase superfamily protein
A.thaliana TAIR10	AT3G23230 - Ethylene Response Factor 98,Integrase-type DNA-binding superfamily protein,Transcriptional Regulator of Defense Response 1
A.thaliana TAIR10	AT3G28340 - galactinol synthase 8,galacturonosyltransferase-like 10
A.thaliana TAIR10	AT5G15450 - ALBINO AND PALE GREEN 6,casein lytic proteinase B3,CASEIN LYTIC PROTEINASE B-P
A.thaliana TAIR10	AT3G55440 - CYTOSOLIC ISOFORM TRIOSE PHOSPHATE ISOMERASE,CYTOSOLIC TRIOSE PHOSPHATE ISOMERASE,triosephosphate isomerase
A.thaliana TAIR10	AT3G26650 - glyceraldehyde 3-phosphate dehydrogenase A subunit,GLYCERALDEHYDE 3-PHOSPHATE DEHYDROGENASE A SUBUNIT 1
A.thaliana TAIR10	AT3G18710 - ARABIDOPSIS THALIANA PLANT U-BOX 29,plant U-box 29
A.thaliana TAIR10	AT5G40450 - Regulator of bulb biogenesis1
A.thaliana TAIR10	AT1G23160 - Auxin-responsive GH3 family protein
A.thaliana TAIR10	AT1G70420 - Protein of unknown function (DUF1645)
A.thaliana TAIR10	AT1G11870 - ovule abortion 7,Seryl-tRNA synthetase
A.thaliana TAIR10	AT3G10060 - FKBP-like peptidyl-prolyl cis-trans isomerase family protein
A.thaliana TAIR10	AT4G03620 - myosin heavy chain-related
A.thaliana TAIR10	AT4G03400 - Auxin-responsive GH3 family protein,DWARF IN LIGHT 2
A.thaliana TAIR10	AT2G43400 - electron-transfer flavoprotein:ubiquinone oxidoreductase
A.thaliana TAIR10	AT3G15730 - phospholipase D alpha 1
A.thaliana TAIR10	AT2G38050 - 3-oxo-5-alpha-steroid 4-dehydrogenase family protein,DE-ETIOLATED 2,DWARF 6
A.thaliana TAIR10	AT3G22460 - O-acetylserine (thiol) lyase (OAS-TL) isoform A2
A.thaliana TAIR10	AT5G63400 - adenylate kinase 1
A.thaliana TAIR10	AT4G32650 - ARABIDOPSIS THALIANA K+ RECTIFYING CHANNEL 1,A. thaliana low-K+-tolerant 1,potassium channel in Arabidopsis thaliana 3
A.thaliana TAIR10	AT3G54770 - ABA-regulated RNA-binding protein 1,ALTERED RNASE PROFILES 1,RNA-binding (RRM/RBD/RNP motifs) family protein
A.thaliana TAIR10	AT3G22160 - jasmonate-associated VQ motif gene 1,VQ motif-containing protein
A.thaliana TAIR10	AT5G11170 - DEAD/DEAH box RNA helicase family protein,homolog of human UAP56 a
A.thaliana TAIR10	AT4G01010 - cyclic nucleotide-gated channel 13,CYCLIC NUCLEOTIDE-GATED CHANNEL 13
A.thaliana TAIR10	AT5G17420 - CELLULOSE SYNTHASE CATALYTIC SUBUNIT 7,Cellulose synthase family protein,IRREGULAR XYLEM 3,MURUS 10
A.thaliana TAIR10	AT5G59430 - TELOMERE REPEAT BINDING PROTEIN 1,telomeric repeat binding protein 1
A.thaliana TAIR10	AT3G11270 - maternal effect embryo arrest 34,Mov34/MPN/PAD-1 family protein
A.thaliana TAIR10	AT3G22620 - Bifunctional inhibitor/lipid-transfer protein/seed storage 2S albumin superfamily protein
A.thaliana TAIR10	AT3G46290 - hercules receptor kinase 1
A.thaliana TAIR10	AT2G04032 - zinc transporter 7 precursor
A.thaliana TAIR10	AT1G71390 - receptor like protein 11
A.thaliana TAIR10	AT2G37630 - ARABIDOPSIS PHANTASTICA-LIKE 1,ASYMMETRIC LEAVES 1,MYB DOMAIN PROTEIN 91,myb-like HTH transcriptional regulator family protein
A.thaliana TAIR10	AT3G10630 - UDP-Glycosyltransferase superfamily protein
A.thaliana TAIR10	AT4G30670 - Putative membrane lipoprotein
A.thaliana TAIR10	AT4G33430 - BRI1-associated receptor kinase,ELONGATED,RECEPTOR KINASES LIKE SERK 10,SOMATIC EMBRYOGENESIS RECEPTOR-LIKE KINASE 3
A.thaliana TAIR10	AT4G18880 - ARABIDOPSIS THALIANA HEAT SHOCK TRANSCRIPTION FACTOR A4A,heat shock transcription factor A4A
A.thaliana TAIR10	AT3G28730 - high mobility group,NUCLEOSOME/CHROMATIN ASSEMBLY FACTOR D
A.thaliana TAIR10	AT3G49240 - embryo defective 1796,NUWA,Pentatricopeptide repeat (PPR) superfamily protein
A.thaliana TAIR10	AT2G14210 - AGAMOUS-like 44,ARABIDOPSIS NITRATE REGULATED 1
A.thaliana TAIR10	AT1G68520 - B-box domain protein 14,B-box type zinc finger protein with CCT domain
A.thaliana TAIR10	AT1G76410 - RING/U-box superfamily protein
A.thaliana TAIR10	AT1G14000 - VH1-interacting kinase
A.thaliana TAIR10	AT3G23030 - indole-3-acetic acid inducible 2
A.thaliana TAIR10	AT1G68670 - myb-like transcription factor family protein
A.thaliana TAIR10	AT3G02480 - ABA-response protein,Late embryogenesis abundant protein (LEA) family protein
A.thaliana TAIR10	AT5G20700 - Protein of unknown function (DUF581)
A.thaliana TAIR10	AT3G20770 - ETHYLENE-INSENSITIVE3,Ethylene insensitive 3 family protein
A.thaliana TAIR10	AT1G22990 - heavy metal associated isoprenylated plant protein 22,Heavy metal transport/detoxification superfamily protein
A.thaliana TAIR10	AT1G01300 - Eukaryotic aspartyl protease family protein
A.thaliana TAIR10	AT2G39200 - MILDEW RESISTANCE LOCUS O 12,Seven transmembrane MLO family protein
A.thaliana TAIR10	AT3G59080 - Eukaryotic aspartyl protease family protein
A.thaliana TAIR10	AT1G29690 - constitutively activated cell death 1,MAC/Perforin domain-containing protein,necrotic spotted lesion 2
A.thaliana TAIR10	AT1G12460 - Leucine-rich repeat protein kinase family protein
A.thaliana TAIR10	AT5G18050 - SAUR-like auxin-responsive protein family,SMALL AUXIN UP RNA 22
A.thaliana TAIR10	AT4G38020 - tRNA/rRNA methyltransferase (SpoU) family protein
A.thaliana TAIR10	AT2G35980 - ARABIDOPSIS NDR1/HIN1-LIKE 10,Late embryogenesis abundant (LEA) hydroxyproline-rich glycoprotein family,NDR1/HIN1-LIKE,YELLOW-LEAF-SPECIFIC GENE 9
A.thaliana TAIR10	AT4G14030 - selenium-binding protein 1
A.thaliana TAIR10	AT5G20720 - chaperonin 20,CHLOROPLAST CHAPERONIN 10
A.thaliana TAIR10	AT3G61120 - AGAMOUS-like 13
A.thaliana TAIR10	AT2G40420 - Transmembrane amino acid transporter family protein
A.thaliana TAIR10	AT2G19540 - heat stress tolerant DWD 1,Transducin family protein / WD-40 repeat family protein
A.thaliana TAIR10	AT4G03430 - EMBRYO DEFECTIVE 2770,pre-mRNA splicing factor-related,STABILIZED 1
A.thaliana TAIR10	AT5G15540 - ARABIDOPSIS THALIANA SISTER-CHROMATID COHESION 2,EMBRYO DEFECTIVE 2773,PHD finger family protein,SISTER-CHROMATID COHESION 2
A.thaliana TAIR10	AT5G39790 - 5'-AMP-activated protein kinase-related,Protein targeting to starch
A.thaliana TAIR10	AT4G31320 - SAUR-like auxin-responsive protein family,SMALL AUXIN UPREGULATED RNA 37
A.thaliana TAIR10	AT1G74030 - enolase 1
A.thaliana TAIR10	AT3G61140 - 26S proteasome, regulatory subunit Rpn7;Proteasome component (PCI) domain,ARABIDOPSIS THALIANA FUSCA 6,CONSTITUTIVE PHOTOMORPHOGENIC 11,COP9 SIGNALOSOME SUBUNIT 1,EMBRYO DEFECTIVE 78,FUSCA 6,SHAGGY-LIKE KINASE 31
A.thaliana TAIR10	AT4G29870 - Oligosaccharyltransferase complex/magnesium transporter family protein
A.thaliana TAIR10	AT4G32320 - ascorbate peroxidase 6
A.thaliana TAIR10	AT5G42180 - peroxidase 64,Peroxidase superfamily protein
A.thaliana TAIR10	AT1G14880 - PLANT CADMIUM RESISTANCE 1
A.thaliana TAIR10	AT5G26010 - Protein phosphatase 2C family protein
A.thaliana TAIR10	AT1G64160 - dirigent protein 5,Disease resistance-responsive (dirigent-like protein) family protein
A.thaliana TAIR10	AT2G19385 - zinc ion binding
A.thaliana TAIR10	AT1G14360 - UDP-galactose transporter 3
A.thaliana TAIR10	AT2G26890 - DNAJ heat shock N-terminal domain-containing protein,GRAVITROPISM DEFECTIVE 2,KATAMARI2
A.thaliana TAIR10	AT5G50915 - basic helix-loop-helix (bHLH) DNA-binding superfamily protein
A.thaliana TAIR10	AT2G38880 - HAPLESS 3,HEME ACTIVATOR PROTEIN (YEAST) HOMOLOG 3,HEME ACTIVATOR PROTEIN (YEAST) HOMOLOG 3A,\"nuclear factor Y, subunit B1\,nuclear factor Y, subunit B1,NUCLEAR FACTOR Y SUBUNIT B1
A.thaliana TAIR10	AT1G61310 - LRR and NB-ARC domains-containing disease resistance protein
A.thaliana TAIR10	AT5G53160 - PYR1-like 8,regulatory components of ABA receptor 3
A.thaliana TAIR10	AT1G55900 - embryo defective 1860,Haloacid dehalogenase-like hydrolase (HAD) superfamily protein
A.thaliana TAIR10	AT5G38480 - general regulatory factor 3
A.thaliana TAIR10	AT5G59530 - 2-oxoglutarate (2OG) and Fe(II)-dependent oxygenase superfamily protein
A.thaliana TAIR10	AT5G42660 - Protein of unknown function (DUF616)
A.thaliana TAIR10	AT3G56850 - ABA-responsive element binding protein 3
A.thaliana TAIR10	AT1G55110 - indeterminate(ID)-domain 7
A.thaliana TAIR10	AT4G08500 - MAPK/ERK kinase kinase 1
A.thaliana TAIR10	AT1G07190 - (1 of 9) 3.4.21.53 - endopeptidase La. / ATP-dependent serine proteinase.
A.thaliana TAIR10	AT5G63890 - HISTIDINE BIOSYNTHESIS 8,histidinol dehydrogenase
A.thaliana TAIR10	AT3G23700 - Nucleic acid-binding proteins superfamily,S1 RNA-binding ribosomal protein 1
A.thaliana TAIR10	AT1G49910 - BUB (BUDDING UNINHIBITED BY BENZYMIDAZOL) 3.2,Transducin/WD40 repeat-like superfamily protein
A.thaliana TAIR10	AT3G49845 - WINDHOSE 3
A.thaliana TAIR10	AT3G50740 - UDP-glucosyl transferase 72E1
A.thaliana TAIR10	AT3G52990 - Pyruvate kinase family protein
A.thaliana TAIR10	AT3G56770 - basic helix-loop-helix (bHLH) DNA-binding superfamily protein
A.thaliana TAIR10	AT2G04800 - (1 of 13) IPR029039 - Flavoprotein-like
A.thaliana TAIR10	AT3G60190 - ARABIDOPSIS DYNAMIN-LIKE 4,DYNAMIN-like 1E,DYNAMIN-LIKE PROTEIN 2,DYNAMIN-RELATED PROTEIN 1E,ENHANCED DISEASE RESISTANCE 3
A.thaliana TAIR10	AT5G21010 - BTB-POZ and MATH domain 5,BTB-POZ AND MATH DOMAIN 5
A.thaliana TAIR10	AT3G50500 - SNF1-related protein kinase 2.2,SNF1-RELATED PROTEIN KINASE 2-2
A.thaliana TAIR10	AT3G45640 - mitogen-activated protein kinase 3
A.thaliana TAIR10	AT1G51620 - Protein kinase superfamily protein
A.thaliana TAIR10	AT3G47070 - (1 of 1) PF11493 - Thylakoid soluble phosphoprotein TSP9 (TSP9)
A.thaliana TAIR10	AT4G27640 - ARM repeat superfamily protein
A.thaliana TAIR10	AT5G27150 - Na+/H+ exchanger 1
A.thaliana TAIR10	AT5G47770 - farnesyl diphosphate synthase 1
A.thaliana TAIR10	AT4G25560 - LONG AFTER FAR-RED LIGHT 1,myb domain protein 18
A.thaliana TAIR10	AT2G20230 - Tetraspanin family protein
A.thaliana TAIR10	AT3G27890 - NADPH:quinone oxidoreductase
A.thaliana TAIR10	AT4G11670 - Protein of unknown function (DUF810)
A.thaliana TAIR10	AT1G04940 - translocon at the inner envelope membrane of chloroplasts 20,translocon at the inner envelope membrane of chloroplasts 20-I
A.thaliana TAIR10	AT5G45210 - Disease resistance protein (TIR-NBS-LRR class) family
A.thaliana TAIR10	AT2G29980 - fatty acid desaturase 3
A.thaliana TAIR10	AT1G49410 - translocase of the outer mitochondrial membrane 6
A.thaliana TAIR10	AT3G47730 - ABC2 homolog 1,A. THALIANA ABC2 HOMOLOG 1,ATP-binding cassette A2
A.thaliana TAIR10	AT5G24550 - beta glucosidase 32
A.thaliana TAIR10	AT3G61890 - ARABIDOPSIS THALIANA HOMEOBOX 12,homeobox 12
A.thaliana TAIR10	AT1G49750 - Leucine-rich repeat (LRR) family protein
A.thaliana TAIR10	AT5G44070 - ARABIDOPSIS THALIANA PHYTOCHELATIN SYNTHASE 1,CADMIUM SENSITIVE 1,PHYTOCHELATIN SYNTHASE 1,phytochelatin synthase 1 (PCS1)
A.thaliana TAIR10	AT5G42270 - FtsH extracellular protease family,VARIEGATED 1
A.thaliana TAIR10	AT5G01310 - APRATAXIN-like
A.thaliana TAIR10	AT3G01180 - starch synthase 2
A.thaliana TAIR10	AT1G76540 - cyclin-dependent kinase B2;1
A.thaliana TAIR10	AT4G16440 - ferredoxin hydrogenases,Growth at different Oxygen Levels Influences Morphogenesis,homolog of yeast NAR1
A.thaliana TAIR10	AT2G48130 - Bifunctional inhibitor/lipid-transfer protein/seed storage 2S albumin superfamily protein
A.thaliana TAIR10	AT1G65060 - 4-coumarate:CoA ligase 3
A.thaliana TAIR10	AT1G35470 - Ran-binding protein in the microtubule-organizing centre,SPla/RYanodine receptor (SPRY) domain-containing protein
A.thaliana TAIR10	AT3G52200 - Dihydrolipoamide acetyltransferase, long form protein,mitochondrial pyruvate dehydrogenase subunit 2-1
A.thaliana TAIR10	AT5G49310 - importin alpha isoform 5
A.thaliana TAIR10	AT3G08610 - (1 of 1) K03945 - NADH dehydrogenase (ubiquinone) 1 alpha subcomplex subunit 1 (NDUFA1)
A.thaliana TAIR10	AT1G13430 - ARABIDOPSIS THALIANA SULFOTRANSFERASE 4C,sulfotransferase 4C
A.thaliana TAIR10	AT1G11310 - MILDEW RESISTANCE LOCUS O 2,POWDERY MILDEW RESISTANT 2,Seven transmembrane MLO family protein
A.thaliana TAIR10	AT3G15850 - fatty acid desaturase 5,FATTY ACID DESATURASE B
A.thaliana TAIR10	AT1G06060 - LisH and RanBPM domains containing protein
A.thaliana TAIR10	AT2G18450 - succinate dehydrogenase 1-2
A.thaliana TAIR10	AT1G68840 - ETHYLENE RESPONSE DNA BINDING FACTOR 2,related to ABI3/VP1 2,RELATED TO AP2 8,TEMPRANILLO 2
A.thaliana TAIR10	AT3G15030 - maternal effect embryo arrest 35,TCP family transcription factor 4
A.thaliana TAIR10	AT1G13270 - methionine aminopeptidase 1B,METHIONINE AMINOPEPTIDASE 1B
A.thaliana TAIR10	AT3G05790 - lon protease 4
A.thaliana TAIR10	AT5G59070 - UDP-Glycosyltransferase superfamily protein
A.thaliana TAIR10	AT5G35750 - histidine kinase 2
A.thaliana TAIR10	AT3G09840 - cell division cycle 48
A.thaliana TAIR10	AT5G50423 - Putative membrane lipoprotein
A.thaliana TAIR10	AT3G17790 - purple acid phosphatase 17
A.thaliana TAIR10	AT3G20290 - EPS15 homology domain 1
A.thaliana TAIR10	AT4G34750 - SAUR-like auxin-responsive protein family,SMALL AUXIN UPREGULATED RNA 49
A.thaliana TAIR10	AT5G66560 - Phototropic-responsive NPH3 family protein
A.thaliana TAIR10	AT2G22240 - INOSITOL 3-PHOSPHATE SYNTHASE 2,myo-inositol-1-phosphate synthase 2,MYO-INOSITOL-1-PHOSTPATE SYNTHASE 2
A.thaliana TAIR10	AT3G10690 - DNA GYRASE A
A.thaliana TAIR10	AT5G26990 - Drought-responsive family protein
A.thaliana TAIR10	AT5G52870 - MEMBRANE-ASSOCIATED KINASE REGULATOR 5
A.thaliana TAIR10	AT1G51360 - dimeric A/B barrel domainS-protein 1,DIMERIC A/B BARREL DOMAINS-PROTEIN 1
A.thaliana TAIR10	AT4G09080 - Outer membrane OMP85 family protein,translocon at the outer envelope membrane of chloroplasts 75-IV,TRANSLOCON OUTER MEMBRANE COMPLEX 75-IV
A.thaliana TAIR10	AT5G42380 - calmodulin like 37
A.thaliana TAIR10	AT5G04720 - ADR1-like 2,PHOENIX 21
A.thaliana TAIR10	AT5G14420 - RING domain ligase2
A.thaliana TAIR10	AT1G80370 - Cyclin A2;4
A.thaliana TAIR10	AT1G72950 - Disease resistance protein (TIR-NBS class)
A.thaliana TAIR10	AT1G53540 - HSP20-like chaperones superfamily protein
A.thaliana TAIR10	AT4G34790 - SAUR-like auxin-responsive protein family,SMALL AUXIN UPREGULATED RNA 3
A.thaliana TAIR10	AT1G62320 - ERD (early-responsive to dehydration stress) family protein
A.thaliana TAIR10	AT3G29190 - Terpenoid cyclases/Protein prenyltransferases superfamily protein
A.thaliana TAIR10	AT2G45850 - AT hook motif DNA-binding family protein,AT-hook motif nuclear localized protein 9
A.thaliana TAIR10	AT5G46410 - SCP1-like small phosphatase 4
A.thaliana TAIR10	AT4G14455 - ARABIDOPSIS THALIANA BET1P/SFT1P-LIKE PROTEIN 14BB,BET1P/SFT1P-LIKE PROTEIN 14BB,Target SNARE coiled-coil domain protein
A.thaliana TAIR10	AT3G08950 - electron transport SCO1/SenC family protein,homologue of the copper chaperone SCO1
A.thaliana TAIR10	AT5G66350 - Lateral root primordium (LRP) protein-related,SHORT INTERNODES
A.thaliana TAIR10	AT3G05020 - ACYL CARRIER PROTEIN,acyl carrier protein 1
A.thaliana TAIR10	AT1G79890 - RAD3-like DNA-binding helicase protein
A.thaliana TAIR10	AT1G72910 - Toll-Interleukin-Resistance (TIR) domain-containing protein
A.thaliana TAIR10	AT5G61890 - Integrase-type DNA-binding superfamily protein
A.thaliana TAIR10	AT5G62920 - response regulator 6
A.thaliana TAIR10	AT1G18570 - HIGH INDOLIC GLUCOSINOLATE 1,myb domain protein 51
A.thaliana TAIR10	AT4G38825 - SAUR-like auxin-responsive protein family,SMALL AUXIN UPREGULATED RNA 13
A.thaliana TAIR10	AT1G54060 - 6B-interacting protein 1-like 1
A.thaliana TAIR10	AT1G61360 - S-locus lectin protein kinase family protein
A.thaliana TAIR10	AT3G24550 - proline extensin-like receptor kinase 1,proline-rich extensin-like receptor kinase 1
A.thaliana TAIR10	AT5G16710 - dehydroascorbate reductase 1
A.thaliana TAIR10	AT4G05100 - myb domain protein 74
A.thaliana TAIR10	AT1G30120 - pyruvate dehydrogenase E1 beta
A.thaliana TAIR10	AT1G74000 - strictosidine synthase 3
A.thaliana TAIR10	AT5G16300 - Conserved Oligomeric Golgi Complex 1,Vps51/Vps67 family (components of vesicular transport) protein
A.thaliana TAIR10	AT4G14690 - Chlorophyll A-B binding family protein,EARLY LIGHT-INDUCIBLE PROTEIN 2
A.thaliana TAIR10	AT1G65700 - Small nuclear ribonucleoprotein family protein,SM-like 8
A.thaliana TAIR10	AT5G38344 - Toll-Interleukin-Resistance (TIR) domain family protein
A.thaliana TAIR10	AT1G78680 - gamma-glutamyl hydrolase 2
A.thaliana TAIR10	AT1G12110 - ARABIDOPSIS THALIANA NITRATE TRANSPORTER 1,CHLORINA 1,NITRATE TRANSPORTER 1,nitrate transporter 1.1,NRT1/ PTR family 6.3
A.thaliana TAIR10	AT5G45110 - NPR1-like protein 3
A.thaliana TAIR10	AT5G07990 - CYTOCHROME P450 75B1,Cytochrome P450 superfamily protein,TRANSPARENT TESTA 7
A.thaliana TAIR10	AT1G02500 - S-adenosylmethionine synthetase 1,S-ADENOSYLMETHIONINE SYNTHETASE-1
A.thaliana TAIR10	AT4G36500 - (1 of 2) PTHR35291:SF2 - TRANSMEMBRANE PROTEIN
A.thaliana TAIR10	AT5G35620 - Eukaryotic initiation factor 4E protein,EUKARYOTIC INITIATION FACTOR (ISO)4E,EUKARYOTIC TRANSLATION INITATION FACTOR 4E2,eukaryotic translation Initiation Factor isoform 4E,LOSS OF SUSCEPTIBILITY TO POTYVIRUS 1
A.thaliana TAIR10	AT4G23220 - cysteine-rich RLK (RECEPTOR-like protein kinase) 14
A.thaliana TAIR10	AT5G23260 - AGAMOUS-like 32,ARABIDOPSIS BSISTER,K-box region and MADS-box transcription factor family protein,TRANSPARENT TESTA16
A.thaliana TAIR10	AT3G13180 - NOL1/NOP2/sun family protein / antitermination NusB domain-containing protein
A.thaliana TAIR10	AT1G16560 - Per1-like family protein
A.thaliana TAIR10	AT5G23080 - SWAP (Suppressor-of-White-APricot)/surp domain-containing protein,TOUGH
A.thaliana TAIR10	AT1G19850 - AUXIN RESPONSE FACTOR 5,indole-3-acetic acid inducible 24,MONOPTEROS,Transcriptional factor B3 family protein / auxin-responsive factor AUX/IAA-related
A.thaliana TAIR10	AT5G18060 - SAUR-like auxin-responsive protein family,SMALL AUXIN UP RNA 23
A.thaliana TAIR10	AT1G50110 - branched-chain aminotransferase 6,D-aminoacid aminotransferase-like PLP-dependent enzymes superfamily protein
A.thaliana TAIR10	AT5G44680 - DNA glycosylase superfamily protein
A.thaliana TAIR10	AT5G09870 - cellulose synthase 5,MUCILAGE-MODIFIED 3
A.thaliana TAIR10	AT1G05250 - peroxidase 2,Peroxidase superfamily protein
A.thaliana TAIR10	AT2G35290 - SMALL AUXIN UPREGULATED RNA 79
A.thaliana TAIR10	AT5G04240 - EARLY FLOWERING 6,Zinc finger (C2H2 type) family protein / transcription factor jumonji (jmj) family protein
A.thaliana TAIR10	AT1G72320 - pumilio 23
A.thaliana TAIR10	AT1G36160 - acetyl-CoA carboxylase 1,EMBRYO DEFECTIVE 22,GLOSSYHEAD 1,GURKE,PASTICCINO 3,SENSITIVE TO FREEZING 3
A.thaliana TAIR10	AT3G54300 - vesicle-associated membrane protein 727
A.thaliana TAIR10	AT1G61190 - LRR and NB-ARC domains-containing disease resistance protein
A.thaliana TAIR10	AT5G63660 - LOW-MOLECULAR-WEIGHT CYSTEINE-RICH 74,Scorpion toxin-like knottin superfamily protein
A.thaliana TAIR10	AT1G20575 - dolichol phosphate mannose synthase 1,Nucleotide-diphospho-sugar transferases superfamily protein
A.thaliana TAIR10	AT5G27200 - acyl carrier protein 5
A.thaliana TAIR10	AT4G25570 - Cytochrome b561/ferric reductase transmembrane protein family
A.thaliana TAIR10	AT5G65140 - Haloacid dehalogenase-like hydrolase (HAD) superfamily protein,trehalose-6-phosphate phosphatase J
A.thaliana TAIR10	AT3G17170 - REGULATOR OF FATTY-ACID COMPOSITION 3,Translation elongation factor EF1B/ribosomal protein S6 family protein
A.thaliana TAIR10	AT1G78630 - embryo defective 1473,Ribosomal protein L13 family protein
A.thaliana TAIR10	AT2G39380 - exocyst subunit exo70 family protein H2
A.thaliana TAIR10	AT5G26030 - ferrochelatase 1
A.thaliana TAIR10	AT3G01800 - Ribosome recycling factor
A.thaliana TAIR10	AT5G48620 - Disease resistance protein (CC-NBS-LRR class) family
A.thaliana TAIR10	AT1G07730 - Disease resistance-responsive (dirigent-like protein) family protein
A.thaliana TAIR10	AT3G01320 - SIN3-like 1
A.thaliana TAIR10	AT5G20400 - 2-oxoglutarate (2OG) and Fe(II)-dependent oxygenase superfamily protein
A.thaliana TAIR10	AT5G54860 - Major facilitator superfamily protein
A.thaliana TAIR10	AT1G77120 - ALCOHOL DEHYDROGENASE,alcohol dehydrogenase 1,ARABIDOPSIS THALIANA ALCOHOL DEHYDROGENASE
A.thaliana TAIR10	AT5G52840 - NADH-ubiquinone oxidoreductase-related
A.thaliana TAIR10	AT5G48800 - Phototropic-responsive NPH3 family protein
A.thaliana TAIR10	AT3G60980 - Tetratricopeptide repeat (TPR)-like superfamily protein
A.thaliana TAIR10	AT3G47710 - BANQUO 3,BASIC HELIX-LOOP-HELIX PROTEIN 161
A.thaliana TAIR10	AT4G24180 - THAUMATIN-LIKE PROTEIN 1
A.thaliana TAIR10	AT2G47470 - ARABIDOPSIS THALIANA PROTEIN DISULFIDE ISOMERASE 11,MATERNAL EFFECT EMBRYO ARREST 30,PDI-LIKE 2-1,PROTEIN DISULFIDE ISOMERASE 11,thioredoxin family protein,UNFERTILIZED EMBRYO SAC 5
A.thaliana TAIR10	AT4G31050 - Biotin/lipoate A/B protein ligase family,octanoyl- transferase
A.thaliana TAIR10	AT3G15950 - DNA topoisomerase-related
A.thaliana TAIR10	AT1G72280 - endoplasmic reticulum oxidoreductins 1
A.thaliana TAIR10	AT2G33050 - receptor like protein 26
A.thaliana TAIR10	AT2G16640 - multimeric translocon complex in the outer envelope membrane 132,MULTIMERIC TRANSLOCON COMPLEX IN THE OUTER ENVELOPE MEMBRANE 132
A.thaliana TAIR10	AT3G28210 - STRESS-ASSOCIATED PROTEIN 12,zinc finger (AN1-like) family protein
A.thaliana TAIR10	AT5G01720 - RNI-like superfamily protein
A.thaliana TAIR10	AT3G05580 - Calcineurin-like metallo-phosphoesterase superfamily protein,type one protein phosphatase 9
A.thaliana TAIR10	AT1G18450 - actin-related protein 4
A.thaliana TAIR10	AT5G37770 - CALMODULIN-LIKE 24,EF hand calcium-binding protein family,TOUCH 2
A.thaliana TAIR10	AT2G35930 - plant U-box 23
A.thaliana TAIR10	AT5G57050 - ABA INSENSITIVE 2,Protein phosphatase 2C family protein
A.thaliana TAIR10	AT1G32583 - (1 of 1) PTHR33184:SF61 - TPD1 PROTEIN HOMOLOG 1
A.thaliana TAIR10	AT2G29350 - senescence-associated gene 13
A.thaliana TAIR10	AT2G35720 - DNAJ heat shock N-terminal domain-containing protein,ORIENTATION UNDER VERY LOW FLUENCES OF LIGHT 1
A.thaliana TAIR10	AT3G44820 - Phototropic-responsive NPH3 family protein
A.thaliana TAIR10	AT5G49630 - amino acid permease 6
A.thaliana TAIR10	AT2G33450 - plastid ribosomal protein L28,Ribosomal L28 family
A.thaliana TAIR10	AT5G14620 - domains rearranged methyltransferase 2
A.thaliana TAIR10	AT1G69040 - ACT domain repeat 4
A.thaliana TAIR10	AT3G02850 - STELAR K+ outward rectifier
A.thaliana TAIR10	AT3G11700 - FASCICLIN-like arabinogalactan protein 18 precursor
A.thaliana TAIR10	AT1G12740 - \"cytochrome P450, family 87, subfamily A, polypeptide 2\,cytochrome P450, family 87, subfamily A, polypeptide 2
A.thaliana TAIR10	AT5G20010 - ARABIDOPSIS THALIANA RAS-RELATED NUCLEAR PROTEIN,RAS-RELATED NUCLEAR PROTEIN,RAS-related nuclear protein-1
A.thaliana TAIR10	AT3G51660 - Tautomerase/MIF superfamily protein
A.thaliana TAIR10	AT1G07135 - glycine-rich protein
A.thaliana TAIR10	AT5G45930 - magnesium chelatase i2
A.thaliana TAIR10	AT1G66380 - myb domain protein 114
A.thaliana TAIR10	AT5G38900 - Thioredoxin superfamily protein
A.thaliana TAIR10	AT4G22720 - Actin-like ATPase superfamily protein
A.thaliana TAIR10	AT3G03070 - NADH-ubiquinone oxidoreductase-related
A.thaliana TAIR10	AT3G16720 - TOXICOS EN LEVADURA 2
A.thaliana TAIR10	AT5G66760 - succinate dehydrogenase 1-1
A.thaliana TAIR10	AT4G11385 - (1 of 5) IPR036202 - DNA topoisomerase I, DNA binding, eukaryotic-type, N-terminal domain superfamily
A.thaliana TAIR10	AT1G09000 - MAP KINASE KINASE KINASE 1,NPK1-related protein kinase 1
A.thaliana TAIR10	AT1G36370 - MORE SULPHUR ACCUMULATION1,serine hydroxymethyltransferase 7
A.thaliana TAIR10	AT1G67040 - TON1 Recruiting Motif 22
A.thaliana TAIR10	AT4G35250 - high chlorophyll fluorescence phenotype 244,NAD(P)-binding Rossmann-fold superfamily protein
A.thaliana TAIR10	AT5G22570 - ARABIDOPSIS THALIANA WRKY DNA-BINDING PROTEIN 38,WRKY DNA-binding protein 38
A.thaliana TAIR10	AT1G27740 - root hair defective 6-like 4
A.thaliana TAIR10	AT4G11660 - HEAT SHOCK TRANSCRIPTION FACTOR B2B,winged-helix DNA-binding transcription factor family protein
A.thaliana TAIR10	AT4G13850 - glycine rich protein 2,glycine-rich RNA-binding protein 2,GLYCINE-RICH RNA-BINDING PROTEIN 2,RNA-binding glycine-rich protein A5
A.thaliana TAIR10	AT1G71830 - somatic embryogenesis receptor-like kinase 1,SOMATIC EMBRYOGENESIS RECEPTOR-LIKE KINASE 1
A.thaliana TAIR10	AT5G44510 - target of AVRB operation1
A.thaliana TAIR10	AT2G23080 - casein kinase II, alpha chain 3,Protein kinase superfamily protein
A.thaliana TAIR10	AT1G68610 - PLANT CADMIUM RESISTANCE 11
A.thaliana TAIR10	AT5G47390 - KUODA1 (Chinese for enlarge or expand),MYB hypocotyl elongation-related,myb-like transcription factor family protein
A.thaliana TAIR10	AT3G62130 - L-cysteine desulfhydrase,Pyridoxal phosphate (PLP)-dependent transferases superfamily protein
A.thaliana TAIR10	AT2G41640 - Glycosyltransferase family 61 protein
A.thaliana TAIR10	AT3G23190 - HR-like lesion-inducing protein-related
A.thaliana TAIR10	AT2G01200 - indole-3-acetic acid inducible 32,maternal effect embryo arrest 10
A.thaliana TAIR10	AT1G27180 - disease resistance protein (TIR-NBS-LRR class), putative
A.thaliana TAIR10	AT4G36900 - DREB AND EAR MOTIF PROTEIN 4,related to AP2 10
A.thaliana TAIR10	AT3G08660 - Phototropic-responsive NPH3 family protein
A.thaliana TAIR10	AT4G19460 - UDP-Glycosyltransferase superfamily protein
A.thaliana TAIR10	AT1G10760 - Pyruvate phosphate dikinase, PEP/pyruvate binding domain,STARCH EXCESS 1
A.thaliana TAIR10	AT5G57180 - chloroplast import apparatus 2
A.thaliana TAIR10	AT1G69828 - Defensin-like (DEFL) family protein
A.thaliana TAIR10	AT5G42520 - ARABIDOPSIS THALIANA BASIC PENTACYSTEINE 6,basic pentacysteine 6
A.thaliana TAIR10	AT3G27530 - golgin candidate 6,MAIGO 4
A.thaliana TAIR10	AT2G39370 - MEMBRANE-ASSOCIATED KINASE REGULATOR 4
A.thaliana TAIR10	AT2G20330 - Transducin/WD40 repeat-like superfamily protein
A.thaliana TAIR10	AT3G60690 - SAUR-like auxin-responsive protein family,SMALL AUXIN UPREGULATED RNA 59
A.thaliana TAIR10	AT4G19060 - P-loop containing nucleoside triphosphate hydrolases superfamily protein
A.thaliana TAIR10	AT1G73230 - Nascent polypeptide-associated complex NAC
A.thaliana TAIR10	AT1G35540 - auxin response factor 14
A.thaliana TAIR10	AT4G16420 - homolog of yeast ADA2 2B,PROPORZ1
A.thaliana TAIR10	AT4G07990 - Chaperone DnaJ-domain superfamily protein
A.thaliana TAIR10	AT1G18880 - Major facilitator superfamily protein,nitrate transporter 1.9,NRT1/ PTR family 2.9
A.thaliana TAIR10	AT2G45170 - AUTOPHAGY 8E
A.thaliana TAIR10	AT2G42280 - ABA-responsive kinase substrate 3,basic helix-loop-helix (bHLH) DNA-binding superfamily protein,FLOWERING BHLH 4
A.thaliana TAIR10	AT2G17840 - EARLY-RESPONSIVE TO DEHYDRATION 7,Senescence/dehydration-associated protein-related
A.thaliana TAIR10	AT2G23150 - natural resistance-associated macrophage protein 3
A.thaliana TAIR10	AT3G60820 - N-terminal nucleophile aminohydrolases (Ntn hydrolases) superfamily protein
A.thaliana TAIR10	AT4G18010 - INOSITOL(1,4,5)P3 5-PHOSPHATASE II,myo-inositol polyphosphate 5-phosphatase 2
A.thaliana TAIR10	AT2G25810 - tonoplast intrinsic protein 4;1
A.thaliana TAIR10	AT5G17880 - constitutive shade-avoidance1,disease resistance protein (TIR-NBS-LRR class)
A.thaliana TAIR10	AT5G42250 - Zinc-binding alcohol dehydrogenase family protein
A.thaliana TAIR10	AT1G64150 - Ca(2+)/H(+) antiporter1,PHOTOSYNTHESIS AFFECTED MUTANT71,Uncharacterized protein family (UPF0016)
A.thaliana TAIR10	AT2G31660 - ARM repeat superfamily protein,enhanced miRNA activity 1,SUPER SENSITIVE TO ABA AND DROUGHT2,UNARMED 9
A.thaliana TAIR10	AT2G18760 - chromatin remodeling 8
A.thaliana TAIR10	AT3G47600 - myb domain protein 94
A.thaliana TAIR10	AT3G03990 - alpha/beta-Hydrolases superfamily protein,DWARF 14
A.thaliana TAIR10	AT3G58170 - ARABIDOPSIS THALIANA BET1P/SFT1P-LIKE PROTEIN 14A,BET1P/SFT1P-like protein 14A
A.thaliana TAIR10	AT4G22880 - ANTHOCYANIDIN SYNTHASE,leucoanthocyanidin dioxygenase,TANNIN DEFICIENT SEED 4
A.thaliana TAIR10	AT1G56600 - galactinol synthase 2
A.thaliana TAIR10	AT4G01870 - tolB protein-related
A.thaliana TAIR10	AT2G31390 - Fructokinase 1,pfkB-like carbohydrate kinase family protein
A.thaliana TAIR10	AT5G42950 - Essential for poteXvirus Accumulation 1,GYF domain-containing protein
A.thaliana TAIR10	AT3G54560 - histone H2A 11
A.thaliana TAIR10	AT4G15760 - monooxygenase 1
A.thaliana TAIR10	AT1G29990 - prefoldin 6
A.thaliana TAIR10	AT2G36380 - ATP-binding cassette G34,pleiotropic drug resistance 6,PLEIOTROPIC DRUG RESISTANCE 6
A.thaliana TAIR10	AT2G11810 - MONOGALACTOSYL DIACYLGLYCEROL SYNTHASE 3,monogalactosyldiacylglycerol synthase type C
A.thaliana TAIR10	AT5G40810 - Cytochrome C1 family
A.thaliana TAIR10	AT3G30210 - myb domain protein 121
A.thaliana TAIR10	AT5G03630 - Pyridine nucleotide-disulphide oxidoreductase family protein
A.thaliana TAIR10	AT4G14800 - 20S proteasome beta subunit D2
A.thaliana TAIR10	AT5G09600 - succinate dehydrogenase 3-1
A.thaliana TAIR10	AT4G19700 - Botrytis Susceptible1 Interactor,IAP-like protein,SBP (S-ribonuclease binding protein) family protein
A.thaliana TAIR10	AT5G46450 - Disease resistance protein (TIR-NBS-LRR class) family
A.thaliana TAIR10	AT1G75490 - Integrase-type DNA-binding superfamily protein
A.thaliana TAIR10	AT3G09810 - isocitrate dehydrogenase VI
A.thaliana TAIR10	AT4G28610 - phosphate starvation response 1
A.thaliana TAIR10	AT5G08120 - movement protein binding protein 2C
A.thaliana TAIR10	AT3G25600 - Calcium-binding EF-hand family protein
A.thaliana TAIR10	AT1G53350 - Disease resistance protein (CC-NBS-LRR class) family
A.thaliana TAIR10	AT3G12250 - TGACG motif-binding factor 6
A.thaliana TAIR10	AT1G52030 - myrosinase-binding protein 2
A.thaliana TAIR10	AT1G78955 - camelliol C synthase 1
A.thaliana TAIR10	AT1G29330 - ARABIDOPSIS ENDOPLASMIC RETICULUM RETENTION DEFECTIVE 2,ARABIDOPSIS THALIANA ENDOPLASMIC RETICULUM RETENTION DEFECTIVE 2,ENDOPLASMIC RETICULUM RETENTION DEFECTIVE 2,ER lumen protein retaining receptor family protein
A.thaliana TAIR10	AT3G43920 - dicer-like 3,DICER-LIKE 3
A.thaliana TAIR10	AT5G14780 - formate dehydrogenase
A.thaliana TAIR10	AT1G63360 - Disease resistance protein (CC-NBS-LRR class) family
A.thaliana TAIR10	AT1G75460 - ATP-dependent protease La (LON) domain protein
A.thaliana TAIR10	AT3G19970 - alpha/beta-Hydrolases superfamily protein
A.thaliana TAIR10	AT5G01760 - ENTH/VHS/GAT family protein
A.thaliana TAIR10	AT2G30170 - PHOTOSYSTEM II CORE PHOSPHATASE,Protein phosphatase 2C family protein
A.thaliana TAIR10	AT5G42655 - Disease resistance-responsive (dirigent-like protein) family protein
A.thaliana TAIR10	AT1G25180 - (1 of 6) IPR015327 - Smaug, pseudo-HEAT analogous topology
A.thaliana TAIR10	AT1G33890 - Avirulence induced gene (AIG1) family protein
A.thaliana TAIR10	AT4G05520 - EPS15 homology domain 2
A.thaliana TAIR10	AT2G40810 - homolog of yeast autophagy 18C
A.thaliana TAIR10	AT5G58390 - Peroxidase superfamily protein
A.thaliana TAIR10	AT2G30480 - (1 of 1) PTHR37722:SF2 - OS01G0167700 PROTEIN
A.thaliana TAIR10	AT1G30620 - HIGH SUGAR RESPONSE8,MURUS 4,NAD(P)-binding Rossmann-fold superfamily protein,UDP-D-XYLOSE 4-EPIMERASE 1
A.thaliana TAIR10	AT3G53900 - PYRIMIDINE R,uracil phosphoribosyltransferase
A.thaliana TAIR10	AT3G21890 - B-box domain protein 31,B-box type zinc finger family protein,microProtein 1b
A.thaliana TAIR10	AT4G01310 - Ribosomal L5P family protein
A.thaliana TAIR10	AT4G40100 - GRAM domain family protein,PRS2-like protein 1
A.thaliana TAIR10	AT1G78410 - VQ motif-containing protein
A.thaliana TAIR10	AT1G59860 - HSP20-like chaperones superfamily protein
A.thaliana TAIR10	AT3G48190 - ARABIDOPSIS THALIANA ATAXIA-TELANGIECTASIA MUTATED,ataxia-telangiectasia mutated,pcd in male gametogenesis 1
A.thaliana TAIR10	AT3G15360 - ARABIDOPSIS THIOREDOXIN M-TYPE 4,thioredoxin M-type 4
A.thaliana TAIR10	AT4G17490 - ethylene responsive element binding factor 6
A.thaliana TAIR10	AT2G32950 - ARABIDOPSIS THALIANA CONSTITUTIVE PHOTOMORPHOGENIC 1,CONSTITUTIVE PHOTOMORPHOGENIC 1,DEETIOLATED MUTANT 340,EMBRYO DEFECTIVE 168,FUSCA 1,Transducin/WD40 repeat-like superfamily protein
A.thaliana TAIR10	AT3G48740 - Nodulin MtN3 family protein
A.thaliana TAIR10	AT1G43810 - (1 of 1) IPR022405 - Diphtheria toxin, translocation domain
A.thaliana TAIR10	AT2G46830 - circadian clock associated 1
A.thaliana TAIR10	AT1G16880 - ACT domain repeats 11,uridylyltransferase-related
A.thaliana TAIR10	AT5G62040 - brother of FT and TFL1,PEBP (phosphatidylethanolamine-binding protein) family protein
A.thaliana TAIR10	AT2G32820 - Transcription elongation factor (TFIIS) family protein
A.thaliana TAIR10	AT5G64905 - elicitor peptide 3 precursor
A.thaliana TAIR10	AT1G29395 - COLD REGULATED 314 INNER MEMBRANE 1,COLD REGULATED 314 THYLAKOID MEMBRANE 1,cold regulated 414 thylakoid membrane 1
A.thaliana TAIR10	AT5G56010 - heat shock protein 81-3,HEAT SHOCK PROTEIN 81.3,HEAT SHOCK PROTEIN 90-3,HEAT SHOCK PROTEIN 90.3
A.thaliana TAIR10	AT4G27670 - heat shock protein 21
A.thaliana TAIR10	AT5G66510 - gamma carbonic anhydrase 3
A.thaliana TAIR10	AT5G13850 - nascent polypeptide-associated complex subunit alpha-like protein 3
A.thaliana TAIR10	AT3G48360 - BTB and TAZ domain protein 2
A.thaliana TAIR10	AT3G55790
A.thaliana TAIR10	AT1G34380 - 5'-3' exonuclease family protein,organellar exonuclease 2
A.thaliana TAIR10	AT4G28760 - Protein of unknown function (DUF3741),TON1 Recruiting Motif 20
A.thaliana TAIR10	AT1G30230 - elongation factor 1B beta,eukaryotic elongation factor 1B beta 1,Glutathione S-transferase, C-terminal-like;Translation elongation factor EF1B/ribosomal protein S6
A.thaliana TAIR10	AT3G07590 - Small nuclear ribonucleoprotein family protein
A.thaliana TAIR10	AT5G45410 - (1 of 1) PTHR31033:SF18 - HIG1 DOMAIN-CONTAINING PROTEIN
A.thaliana TAIR10	AT3G23300 - S-adenosyl-L-methionine-dependent methyltransferases superfamily protein
A.thaliana TAIR10	AT3G55040 - glutathione transferase lambda 2
A.thaliana TAIR10	AT5G58780 - cis -prenyltransferase 5,heptaprenyl diphosphate synthase,Undecaprenyl pyrophosphate synthetase family protein
A.thaliana TAIR10	AT5G23570 - SUPPRESSOR OF GENE SILENCING 3,XS domain-containing protein / XS zinc finger domain-containing protein-related
A.thaliana TAIR10	AT2G41560 - \"autoinhibited Ca(2+)-ATPase, isoform 4\,autoinhibited Ca(2+)-ATPase, isoform 4
A.thaliana TAIR10	AT4G33010 - glycine decarboxylase P-protein 1
A.thaliana TAIR10	AT4G13040 - Apetala 2 family protein involved in SA mediated disease defense 1,Integrase-type DNA-binding superfamily protein
A.thaliana TAIR10	AT2G38470 - WRKY DNA-binding protein 33,WRKY DNA-BINDING PROTEIN 33
A.thaliana TAIR10	AT4G24280 - chloroplast heat shock protein 70-1
A.thaliana TAIR10	AT5G28530 - FAR1-related sequence 10
A.thaliana TAIR10	AT3G54920 - Pectin lyase-like superfamily protein,powdery mildew resistant 6
A.thaliana TAIR10	AT4G15180 - SET domain protein 2
A.thaliana TAIR10	AT1G30135 - jasmonate-zim-domain protein 8
A.thaliana TAIR10	AT1G29420 - SAUR-like auxin-responsive protein family,SMALL AUXIN UPREGULATED RNA 61
A.thaliana TAIR10	AT5G03790 - homeobox 51,LATE MERISTEM IDENTITY1
A.thaliana TAIR10	AT1G30680 - Arabidopsis TWINKLE homolog,toprim domain-containing protein
A.thaliana TAIR10	AT1G75410 - BEL1-like homeodomain 3
A.thaliana TAIR10	AT4G02280 - ABNORMAL SUSPENSOR 3,sucrose synthase 3
A.thaliana TAIR10	AT5G41240 - glutathione S-transferase THETA 2
A.thaliana TAIR10	AT2G34250 - SecY protein transport family protein
A.thaliana TAIR10	AT4G12050 - AT-hook motif nuclear localized protein 26,Predicted AT-hook DNA-binding family protein
A.thaliana TAIR10	AT5G46330 - FLAGELLIN-SENSITIVE 2,Leucine-rich receptor-like protein kinase family protein
A.thaliana TAIR10	AT5G20650 - copper transporter 5
A.thaliana TAIR10	AT3G24590 - plastidic type i signal peptidase 1
A.thaliana TAIR10	AT2G24060 - Initiation factor 3-2,SUPPRESSOR OF VARIEGATION9,Translation initiation factor 3 protein
A.thaliana TAIR10	AT1G74670 - GA-stimulated Arabidopsis 6,Gibberellin-regulated family protein
A.thaliana TAIR10	AT5G20480 - EF-TU receptor
A.thaliana TAIR10	AT1G73370 - ARABIDOPSIS THALIANA SUCROSE SYNTHASE 6,sucrose synthase 6
A.thaliana TAIR10	AT4G00860 - Arabidopsis thaliana ozone-induced protein 1,Protein of unknown function (DUF1138)
A.thaliana TAIR10	AT3G60130 - beta glucosidase 16
A.thaliana TAIR10	AT5G22410 - root hair specific 18
A.thaliana TAIR10	AT1G45145 - LOCUS OF INSENSITIVITY TO VICTORIN 1,thioredoxin H-type 5,THIOREDOXIN H-TYPE 5
A.thaliana TAIR10	AT3G48000 - aldehyde dehydrogenase 2,aldehyde dehydrogenase 2A,aldehyde dehydrogenase 2B4
A.thaliana TAIR10	AT1G77450 - NAC domain containing protein 32
A.thaliana TAIR10	AT5G20270 - heptahelical transmembrane protein1
A.thaliana TAIR10	AT2G46170 - Reticulon family protein
A.thaliana TAIR10	AT2G43800 - Actin-binding FH2 (formin homology 2) family protein
A.thaliana TAIR10	AT5G03570 - ARABIDOPSIS THALIANA IRON-REGULATED PROTEIN 2,FERROPORTIN 2,iron regulated 2
A.thaliana TAIR10	AT4G32530 - ATPase, F0/V0 complex, subunit C protein
A.thaliana TAIR10	AT3G13950 - (1 of 1) PTHR24177:SF427 - EXPRESSED PROTEIN
A.thaliana TAIR10	AT4G34800 - SAUR-like auxin-responsive protein family,SMALL AUXIN UPREGULATED RNA 4
A.thaliana TAIR10	AT5G42410 - SAUR-like auxin-responsive protein family,SMALL AUXIN UPREGULATED RNA 43
A.thaliana TAIR10	AT5G11250 - BNT1,Disease resistance protein (TIR-NBS-LRR class)
A.thaliana TAIR10	AT5G54470 - B-box domain protein 29,B-box type zinc finger family protein
A.thaliana TAIR10	AT5G13680 - ABA-OVERLY SENSITIVE 1,ELONGATA 2,IKI3 family protein
A.thaliana TAIR10	AT5G43970 - translocase of outer membrane 22-V,TRANSLOCASE OUTER MITOCHONDRIAL MEMBRANE 22-V
A.thaliana TAIR10	AT5G37610 - Eukaryotic porin family protein
A.thaliana TAIR10	AT1G73260 - ARABIDOPSIS THALIANA KUNITZ TRYPSIN INHIBITOR 1,kunitz trypsin inhibitor 1
A.thaliana TAIR10	AT5G08560 - transducin family protein / WD-40 repeat family protein,WD-40 repeat 26
A.thaliana TAIR10	AT1G10240 - FAR1-related sequence 11
A.thaliana TAIR10	AT1G52760 - Caffeoyl Shikimate Esterase,lysophospholipase 2
A.thaliana TAIR10	AT3G10730 - ARABIDOPSIS SAD1/UNC-84 DOMAIN PROTEIN 2,SAD1/UNC-84 domain protein 2
A.thaliana TAIR10	AT3G61182 - low-molecular-weight cysteine-rich 54
A.thaliana TAIR10	AT1G74770 - zinc ion binding
A.thaliana TAIR10	AT4G04955 - allantoinase
A.thaliana TAIR10	AT5G01540 - lectin receptor kinase a4.1,L-type lectin receptor kinase-VI.2
A.thaliana TAIR10	AT5G26220 - ChaC-like family protein,gamma-glutamyl cyclotransferase 2;1
A.thaliana TAIR10	AT3G26090 - G-protein coupled receptors;GTPase activators,REGULATOR OF G-PROTEIN SIGNALING 1
A.thaliana TAIR10	AT2G44950 - histone mono-ubiquitination 1,REDUCED DORMANCY 4
A.thaliana TAIR10	AT1G72680 - cinnamyl-alcohol dehydrogenase,CINNAMYL ALCOHOL DEHYDROGENASE 1
A.thaliana TAIR10	AT4G26440 - MICROSPORE-SPECIFIC PROMOTER 3,WRK protein 34,WRKY DNA-binding protein 34
A.thaliana TAIR10	AT4G22750 - DHHC-type zinc finger family protein,protein acyltransferase 13
A.thaliana TAIR10	AT5G63110 - histone deacetylase 6,HISTONE DEACETYLASE 6,RNA-MEDIATED TRANSCRIPTIONAL SILENCING 1
A.thaliana TAIR10	AT1G15220 - cytochrome c biogenesis protein family
A.thaliana TAIR10	AT3G57130 - Ankyrin repeat family protein / BTB/POZ domain-containing protein,BLADE ON PETIOLE 1,BRZ-SENSITIVE-SHORT HYPOCOTYL1
A.thaliana TAIR10	AT2G27300 - Arabidopsis NAC domain containing protein 40,NTM1-like 8
A.thaliana TAIR10	AT5G44630 - Terpenoid cyclases/Protein prenyltransferases superfamily protein
A.thaliana TAIR10	AT5G65800 - ACC synthase 5,CYTOKININ-INSENSITIVE 5,ETHYLENE OVERPRODUCER 2
A.thaliana TAIR10	AT5G65040 - Increased Resistance to Myzus persicae 1,Protein of unknown function (DUF581)
A.thaliana TAIR10	AT2G34600 - jasmonate-zim-domain protein 7
A.thaliana TAIR10	AT5G64720 - EGG CELL 1.5,Protein of unknown function (DUF1278)
A.thaliana TAIR10	AT5G43370 - ARABIDOPSIS PHOSPHATE TRANSPORTER 1,phosphate transporter 2,PHOSPHATE TRANSPORTER 2
A.thaliana TAIR10	AT1G66960 - Terpenoid cyclases family protein
A.thaliana TAIR10	AT4G26850 - GDP-l-galactose phosphorylase,mannose-1-phosphate guanylyltransferase (GDP)s;GDP-galactose:mannose-1-phosphate guanylyltransferases;GDP-galactose:glucose-1-phosphate guanylyltransferases;GDP-galactose:myoinositol-1-phosphate guanylyltransferases;glucose-1-phosphate guanylyltransferase,vitamin c defective 2
A.thaliana TAIR10	AT5G07010 - ARABIDOPSIS THALIANA SULFOTRANSFERASE 2A,sulfotransferase 2A
A.thaliana TAIR10	AT1G79270 - evolutionarily conserved C-terminal region 8
A.thaliana TAIR10	AT4G21960 - Peroxidase superfamily protein
A.thaliana TAIR10	AT1G72770 - homology to ABI1,HYPERSENSITIVE TO ABA1
A.thaliana TAIR10	AT1G07890 - ascorbate peroxidase 1,maternal effect embryo arrest 6
A.thaliana TAIR10	AT1G10940 - ARABIDOPSIS SERINE/THREONINE KINASE 1,Protein kinase superfamily protein,SNF1-related protein kinase 2.4,SUCROSE NONFERMENTING 1-RELATED PROTEIN KINASE 2-4
A.thaliana TAIR10	AT5G52560 - UDP-sugar pyrophosphorylase
A.thaliana TAIR10	AT2G14560 - LATE UPREGULATED IN RESPONSE TO HYALOPERONOSPORA PARASITICA,Protein of unknown function (DUF567)
A.thaliana TAIR10	AT2G21160 - Translocon-associated protein (TRAP), alpha subunit
A.thaliana TAIR10	AT5G13220 - JASMONATE-ASSOCIATED 1,jasmonate-zim-domain protein 10,TIFY DOMAIN PROTEIN 9
A.thaliana TAIR10	AT1G24530 - Transducin/WD40 repeat-like superfamily protein
A.thaliana TAIR10	AT3G52090 - DNA-directed RNA polymerase, RBP11-like
A.thaliana TAIR10	AT1G44350 - IAA-leucine resistant (ILR)-like gene 6
A.thaliana TAIR10	AT5G06070 - C2H2 and C2HC zinc fingers superfamily protein,RABBIT EARS
A.thaliana TAIR10	AT5G38210 - Leaf rust 10 disease-resistance locus receptor- like protein kinase-like 3,Protein kinase family protein
A.thaliana TAIR10	AT1G45249 - abscisic acid responsive elements-binding factor 2,ABSCISIC ACID RESPONSIVE ELEMENTS-BINDING PROTEIN 2
A.thaliana TAIR10	AT4G27220 - NB-ARC domain-containing disease resistance protein
A.thaliana TAIR10	AT4G12130 - Glycine cleavage T-protein family
A.thaliana TAIR10	AT4G38350 - Niemann-Pick disease type C1-2,Patched family protein
A.thaliana TAIR10	AT3G11480 - S-adenosyl-L-methionine-dependent methyltransferases superfamily protein
A.thaliana TAIR10	AT3G02130 - clv3 peptide insensitive 1,receptor-like protein kinase 2,TOADSTOOL 2
A.thaliana TAIR10	AT5G24800 - ARABIDOPSIS THALIANA BASIC LEUCINE ZIPPER 9,basic leucine zipper 9,BASIC LEUCINE ZIPPER O2 HOMOLOG 2
A.thaliana TAIR10	AT1G30870 - PEROXIDASE7,Peroxidase superfamily protein
A.thaliana TAIR10	AT1G49720 - abscisic acid responsive element-binding factor 1
A.thaliana TAIR10	AT3G49120 - ARABIDOPSIS THALIANA PEROXIDASE CB,PEROXIDASE 34,peroxidase CB
A.thaliana TAIR10	AT2G34720 - \"nuclear factor Y, subunit A4\,nuclear factor Y, subunit A4
A.thaliana TAIR10	AT3G07520 - glutamate receptor 1.4
A.thaliana TAIR10	AT1G67370 - ASYNAPTIC 1,DNA-binding HORMA family protein
A.thaliana TAIR10	AT3G17510 - CBL-interacting protein kinase 1,SNF1-RELATED PROTEIN KINASE 3.16
A.thaliana TAIR10	AT4G10780 - LRR and NB-ARC domains-containing disease resistance protein
A.thaliana TAIR10	AT4G24670 - tryptophan aminotransferase related 2
A.thaliana TAIR10	AT1G56190 - Phosphoglycerate kinase family protein
A.thaliana TAIR10	AT3G09440 - Heat shock protein 70 (Hsp 70) family protein
A.thaliana TAIR10	AT4G36410 - ubiquitin-conjugating enzyme 17
A.thaliana TAIR10	AT3G17810 - pyrimidine 1
A.thaliana TAIR10	AT3G62720 - XYG XYLOSYLTRANSFERASE 1,xylosyltransferase 1
A.thaliana TAIR10	AT1G14210 - Ribonuclease T2 family protein
A.thaliana TAIR10	AT5G16390 - BIOTIN CARBOXYL CARRIER PROTEIN,BIOTIN CARBOXYL-CARRIER PROTEIN 1,chloroplastic acetylcoenzyme A carboxylase 1
A.thaliana TAIR10	AT3G13662 - Disease resistance-responsive (dirigent-like protein) family protein
A.thaliana TAIR10	AT1G50030 - target of rapamycin
A.thaliana TAIR10	AT4G35490 - mitochondrial ribosomal protein L11
A.thaliana TAIR10	AT4G27690 - vacuolar protein sorting 26B
A.thaliana TAIR10	AT2G18730 - diacylglycerol kinase 3
A.thaliana TAIR10	AT5G58580 - Salt Tolerance RING Finger 1,TOXICOS EN LEVADURA 63
A.thaliana TAIR10	AT1G51760 - IAA-ALANINE RESISTANT 3,JASMONIC ACID RESPONSIVE 3,peptidase M20/M25/M40 family protein
A.thaliana TAIR10	AT1G08630 - threonine aldolase 1
A.thaliana TAIR10	AT1G48800 - Terpenoid cyclases/Protein prenyltransferases superfamily protein
A.thaliana TAIR10	AT4G24920 - secE/sec61-gamma protein transport protein
A.thaliana TAIR10	AT5G12330 - LATERAL ROOT PRIMORDIUM 1,Lateral root primordium (LRP) protein-related
A.thaliana TAIR10	AT2G29530 - Tim10/DDP family zinc finger protein,TRANSLOCASE OF THE INNER MEMBRANE 10
A.thaliana TAIR10	AT1G68150 - WRKY DNA-binding protein 9
A.thaliana TAIR10	AT2G21195 - (1 of 1) PTHR48204:SF1 - OS07G0265100 PROTEIN
A.thaliana TAIR10	AT2G14740 - binding protein of 80 kDa 2;2,vaculolar sorting receptor 3,VACUOLAR SORTING RECEPTOR 2;2,VACUOLAR SORTING RECEPTOR 3
A.thaliana TAIR10	AT1G15360 - Integrase-type DNA-binding superfamily protein,SHINE 1,WAX INDUCER 1
A.thaliana TAIR10	AT2G37400 - Tetratricopeptide repeat (TPR)-like superfamily protein
A.thaliana TAIR10	AT2G07689 - NADH-Ubiquinone/plastoquinone (complex I) protein
A.thaliana TAIR10	AT5G13490 - ADP/ATP carrier 2
A.thaliana TAIR10	AT4G35630 - phosphoserine aminotransferase,phosphoserine aminotransferase 1
A.thaliana TAIR10	AT5G16290 - VALINE-TOLERANT 1
A.thaliana TAIR10	AT1G79930 - heat shock protein 91
A.thaliana TAIR10	AT5G09860 - nuclear matrix protein-related
A.thaliana TAIR10	AT3G20660 - organic cation/carnitine transporter4
A.thaliana TAIR10	AT5G24210 - alpha/beta-Hydrolases superfamily protein
A.thaliana TAIR10	AT1G17840 - ARABIDOPSIS THALIANA WHITE-BROWN COMPLEX HOMOLOG PROTEIN 11,ATP-binding cassette G11,CUTICULAR DEFECT AND ORGAN FUSION 1,DESPERADO,white-brown complex homolog protein 11
A.thaliana TAIR10	AT3G02140 - ABI FIVE BINDING PROTEIN 4,AFP2 (ABI five-binding protein 2) family protein,TWO OR MORE ABRES-CONTAINING GENE 2
A.thaliana TAIR10	AT1G03070 - Bax inhibitor-1 family protein,LIFEGUARD 4
A.thaliana TAIR10	AT3G03910 - glutamate dehydrogenase 3
A.thaliana TAIR10	AT5G63450 - \"cytochrome P450, family 94, subfamily B, polypeptide 1\,cytochrome P450, family 94, subfamily B, polypeptide 1
A.thaliana TAIR10	AT5G42820 - Zinc finger C-x8-C-x5-C-x3-H type family protein
A.thaliana TAIR10	AT1G73080 - PEP1 receptor 1,PEP1 RECEPTOR 1
A.thaliana TAIR10	AT1G06190 - Rho-N 1,Rho termination factor
A.thaliana TAIR10	AT5G64900 - ARABIDOPSIS THALIANA PEPTIDE 1,PEPTIDE 1,precursor of peptide 1
A.thaliana TAIR10	AT3G63210 - MEDIATOR OF ABA-REGULATED DORMANCY 1,Protein of unknown function (DUF581)
A.thaliana TAIR10	AT5G37055 - HIT-type Zinc finger family protein,SERRATED LEAVES AND EARLY FLOWERING
A.thaliana TAIR10	AT2G25355 - PNAS-3 related
A.thaliana TAIR10	AT1G12010 - 2-oxoglutarate (2OG) and Fe(II)-dependent oxygenase superfamily protein
A.thaliana TAIR10	AT2G37270 - ribosomal protein 5B
A.thaliana TAIR10	AT2G43080 - P4H isoform 1
A.thaliana TAIR10	AT5G63940 - Protein kinase protein with adenine nucleotide alpha hydrolases-like domain
A.thaliana TAIR10	AT2G26440 - pectin methylesterase 12,Plant invertase/pectin methylesterase inhibitor superfamily
A.thaliana TAIR10	AT3G48520 - cytochrome P450, family 94, subfamily B, polypeptide 3
A.thaliana TAIR10	AT2G36420 - TON1 Recruiting Motif 27
A.thaliana TAIR10	AT5G26780 - serine hydroxymethyltransferase 2
A.thaliana TAIR10	AT2G17055 - Toll-Interleukin-Resistance (TIR) domain family protein
A.thaliana TAIR10	AT3G44400 - Disease resistance protein (TIR-NBS-LRR class) family
A.thaliana TAIR10	AT3G03610 - ELMO/CED-12 family protein
A.thaliana TAIR10	AT2G14610 - pathogenesis-related gene 1,PATHOGENESIS-RELATED GENE 1
A.thaliana TAIR10	AT2G38020 - MANGLED,VACUOLELESS 1,vacuoleless1 (VCL1)
A.thaliana TAIR10	AT1G20310 - (1 of 1) PTHR34779:SF6 - SYRINGOLIDE-INDUCED PROTEIN
A.thaliana TAIR10	AT5G01900 - ARABIDOPSIS THALIANA WRKY DNA-BINDING PROTEIN 62,WRKY DNA-binding protein 62
A.thaliana TAIR10	AT4G21534 - Diacylglycerol kinase family protein,sphingosine kinase 2
A.thaliana TAIR10	AT2G38290 - ammonium transporter 2,AMMONIUM TRANSPORTER 2;1
A.thaliana TAIR10	AT2G22500 - DICARBOXYLATE CARRIER 1,PLANT UNCOUPLING MITOCHONDRIAL PROTEIN 5,uncoupling protein 5
A.thaliana TAIR10	AT3G06510 - Glycosyl hydrolase superfamily protein,SENSITIVE TO FREEZING 2
A.thaliana TAIR10	AT3G16850 - Pectin lyase-like superfamily protein
A.thaliana TAIR10	AT3G60450 - Phosphoglycerate mutase family protein
A.thaliana TAIR10	AT3G12810 - PHOTOPERIOD-INDEPENDENT EARLY FLOWERING 1,SNF2 domain-containing protein / helicase domain-containing protein
A.thaliana TAIR10	AT2G01950 - BRI1-like 2,VASCULAR HIGHWAY 1
A.thaliana TAIR10	AT1G17540 - Protein kinase protein with adenine nucleotide alpha hydrolases-like domain
A.thaliana TAIR10	AT3G23560 - ABERRANT LATERAL ROOT FORMATION 5,MATE efflux family protein
A.thaliana TAIR10	AT5G46871 - Putative membrane lipoprotein
A.thaliana TAIR10	AT4G39140 - RING/U-box superfamily protein
A.thaliana TAIR10	AT3G60530 - GATA transcription factor 4
A.thaliana TAIR10	AT3G02470 - S-adenosylmethionine decarboxylase
A.thaliana TAIR10	AT5G57950 - 26S proteasome regulatory subunit, putative
A.thaliana TAIR10	AT1G24140 - Matrixin family protein
A.thaliana TAIR10	AT1G09090 - respiratory burst oxidase homolog B
A.thaliana TAIR10	AT5G05370 - Cytochrome b-c1 complex, subunit 8 protein
A.thaliana TAIR10	AT5G47070 - Protein kinase superfamily protein
A.thaliana TAIR10	AT3G05800 - AtBS1(activation-tagged BRI1 suppressor 1)-interacting factor 1
A.thaliana TAIR10	AT4G21440 - A. THALIANA MYB 4,MYB-like 102
A.thaliana TAIR10	AT5G10860 - CBS domain containing protein 3,Cystathionine beta-synthase (CBS) family protein
A.thaliana TAIR10	AT1G70370 - polygalacturonase 2
A.thaliana TAIR10	AT4G35310 - calmodulin-domain protein kinase 5
A.thaliana TAIR10	AT3G53200 - myb domain protein 27
A.thaliana TAIR10	AT5G39500 - ENDOPLASMIC RETICULUM MORPHOLOGY 1,GNOM-like 1
A.thaliana TAIR10	AT5G56530 - Protein of Unknown Function (DUF239)
A.thaliana TAIR10	AT3G04000 - NAD(P)-binding Rossmann-fold superfamily protein
A.thaliana TAIR10	AT1G13420 - ARABIDOPSIS THALIANA SULFOTRANSFERASE 4B,sulfotransferase 4B
A.thaliana TAIR10	AT3G50950 - HOPZ-ACTIVATED RESISTANCE 1
A.thaliana TAIR10	AT1G72840 - Disease resistance protein (TIR-NBS-LRR class)
A.thaliana TAIR10	AT3G47620 - TEOSINTE BRANCHED, cycloidea and PCF (TCP) 14
A.thaliana TAIR10	AT2G02380 - glutathione S-transferase (class zeta) 2
A.thaliana TAIR10	AT3G23150 - ethylene response 2,Signal transduction histidine kinase, hybrid-type, ethylene sensor
A.thaliana TAIR10	AT1G03280 - Transcription factor TFIIE, alpha subunit
A.thaliana TAIR10	AT5G04430 - BINDING TO TOMV RNA 1,binding to TOMV RNA 1L (long form),BINDING TO TOMV RNA 1S (SHORT FORM)
A.thaliana TAIR10	AT3G11650 - NDR1/HIN1-like 2
A.thaliana TAIR10	AT1G16850 - (1 of 1) PTHR35463:SF11 - PROTEIN, PUTATIVE-RELATED
A.thaliana TAIR10	AT1G26470 - SnRK2-substrate 1
A.thaliana TAIR10	AT5G08290 - mRNA splicing factor, thioredoxin-like U5 snRNP,YELLOW-LEAF-SPECIFIC GENE 8
A.thaliana TAIR10	AT1G42990 - basic region/leucine zipper motif 60,Bbasic region/leucine zipper motif 60
A.thaliana TAIR10	AT1G16240 - syntaxin of plants 51
A.thaliana TAIR10	AT4G09630 - Protein of unknown function (DUF616)
A.thaliana TAIR10	AT1G70610 - ATP-binding cassette B26,transporter associated with antigen processing protein 1
A.thaliana TAIR10	AT4G17170 - ARABIDOPSIS RAB GTPASE HOMOLOG B1B,RAB GTPASE HOMOLOG B1B,RAB GTPase homolog B1C
[truncated: 4,484 more rows]

## Sheet: Table S3
		Table S3 BLASTp results of Arabidopsis thaliana proteins aligned against the T. cacao proteome
Query ID	Subject ID	% Identity	Coverage	Mismatches	Alignment length (aa)	Chromosome	Start position	End position	Gene name	Functional annotation
AT2G16510.1	XP_007046739.1	100	99	1.08e-111	314	NC_030850.1	966828	966906	LOC18610800	V-type	proton	ATPase	16	kDa	proteolipid	subunit
AT2G16510.1	XP_007042016.1	100	99	1.08e-111	314	NC_030851.1	3611714	3611792	LOC18607679	V-type	proton	ATPase	16	kDa	proteolipid	subunit
AT2G28740.1	XP_007027067.1	100	99	2.23e-68	199	NC_030854.1	1957911	1958222	LOC18597789	histone	H4
AT2G28740.1	XP_007027069.1	100	99	2.23e-68	199	NC_030854.1	1966407	1966718	LOC18597790	histone	H4
AT2G28740.1	XP_007024825.1	100	99	2.23e-68	199	NC_030855.1	20872942	20873253	LOC18596347	histone	H4
AT2G16510.1	XP_017981170.1	100	99	1.08e-111	314	NC_030857.1	1667738	1667816	LOC18591494	V-type	proton	ATPase	16	kDa	proteolipid	subunit
AT2G16510.1	XP_007019085.1	100	99	1.08e-111	314	NC_030857.1	6556202	6556280	LOC18592349	V-type	proton	ATPase	16	kDa	proteolipid	subunit
AT2G28740.1	XP_007014216.1	100	99	2.23e-68	199	NC_030858.1	13161520	13161831	LOC18589267	histone	H4
AT2G28740.1	XP_007016483.1	100	99	2.23e-68	199	NC_030858.1	36535450	36535761	LOC18590730	histone	H4
AT2G28740.1	XP_007016577.1	100	99	2.23e-68	199	NC_030858.1	36829182	36829493	LOC18590784	histone	H4
AT2G28740.1	XP_007009385.1	100	99	2.23e-68	199	NC_030859.1	2283384	2283695	LOC18586132	histone	H4
AT2G28740.1	XP_017985006.1	100	99	2.23e-68	199	NC_030859.1	3289994	3290305	LOC18586293	histone	H4
AT1G78870.2	XP_007021721.1	98.693	99	4.98e-111	313	NC_030856.1	6541727	6541915	LOC18594172	ubiquitin-conjugating	enzyme	E2	36
AT5G09810.1	XP_017984096.1	98.674	99	0	775	NC_030850.1	6651339	6651398	LOC18611763	actin-7
AT5G09810.1	XP_017984104.1	98.674	99	0	775	NC_030850.1	6651339	6651398	LOC18611763	actin-7
AT5G09810.1	XP_017984101.1	98.674	99	0	775	NC_030850.1	6651339	6651398	LOC18611763	actin-7
ATCG00720.1	YP_004021346.1	98.605	99	2.05e-156	431	NC_014676.2	79904	79909	petB	cytochrome	b6
AT5G08290.1	XP_007043276.1	98.592	99	1.76e-105	296	NC_030851.1	8435364	8435483	LOC18608490	thioredoxin-like	protein	YLS8	isoform	X1
AT5G09810.1	XP_007039276.1	97.878	99	0	767	NC_030852.1	30685943	30686002	LOC18605909	actin-7
AT5G09810.1	XP_007039275.1	97.878	99	0	767	NC_030852.1	30685943	30686002	LOC18605909	actin-7
AT5G09810.1	XP_017970877.1	97.613	99	0	763	NC_030851.1	2224153	2224209	LOC18607391	actin-100
AT5G09810.1	XP_017970876.1	97.613	99	0	763	NC_030851.1	2224153	2224209	LOC18607391	actin-100
AT5G09810.1	XP_007041601.1	97.613	99	0	763	NC_030851.1	2224153	2224209	LOC18607391	actin-100
AT5G20020.1	XP_007013338.1	97.285	99	5.72e-166	456	NC_030858.1	6477130	6477132	LOC18588700	GTP-binding	nuclear	protein	Ran-3
AT5G62700.1	XP_007038700.1	97.209	95	0	864	NC_030852.1	28789997	28790390	LOC18605569	tubulin	beta-1	chain
AT5G19780.1	XP_007014666.1	97.111	99	0	912	NC_030858.1	22941339	22941451	LOC18589573	tubulin	alpha-3	chain
AT5G62700.1	XP_007040195.1	96.977	95	0	858	NC_030852.1	34010976	34011369	LOC18606503	tubulin	beta-9	chain
AT5G09810.1	XP_007027035.1	96.817	99	0	766	NC_030854.1	1849546	1849605	LOC18597766	actin
AT5G54640.1	XP_007021101.1	96.8	95	4.91e-84	241	NC_030856.1	3105270	3105458	LOC18593695	histone	H2A.6
AT5G62700.1	XP_007026823.2	96.637	99	0	906	NC_030854.1	1132163	1132556	LOC18597621	tubulin	beta-8	chain
AT5G62700.1	XP_007016239.1	96.629	99	0	902	NC_030858.1	35790443	35790836	LOC18590570	tubulin	beta-8	chain
AT5G62700.1	XP_007028241.2	96.52	96	0	858	NC_030854.1	18684287	18684680	LOC18598602	tubulin	beta-4	chain
AT4G38510.5	XP_007036767.1	96.516	98	0	959	NC_030852.1	4978328	4978385	LOC18604310	V-type	proton	ATPase	subunit	B	1
AT4G38510.5	XP_007017895.1	96.516	98	0	961	NC_030857.1	2258559	2258616	LOC18591612	V-type	proton	ATPase	subunit	B2
AT5G62700.1	XP_007015367.1	96.512	95	0	857	NC_030858.1	31443474	31443867	LOC18590034	tubulin	beta-5	chain
AT5G08290.1	XP_017971313.1	96.479	99	4.33e-104	293	NC_030851.1	8436625	8436744	LOC18608490	thioredoxin-like	protein	YLS8	isoform	X2
AT5G09810.1	XP_017977121.1	96.286	99	0	763	NC_030854.1	28635967	28636026	LOC18599107	actin
AT5G09810.1	XP_007016432.1	96.286	99	0	765	NC_030858.1	36395408	36395467	LOC18590701	actin
AT5G09810.1	XP_017983629.1	96.286	99	0	765	NC_030858.1	36395408	36395467	LOC18590701	actin
AT5G09810.1	XP_017983628.1	96.286	99	0	765	NC_030858.1	36395408	36395467	LOC18590701	actin
AT4G29040.1	XP_017969550.1	96.188	99	0	860	NC_030850.1	7423172	7423654	LOC18611870	26S	proteasome	regulatory	subunit	4	homolog	A
AT4G29040.1	XP_007049878.1	96.188	99	0	860	NC_030850.1	18819254	18819736	LOC18612857	26S	proteasome	regulatory	subunit	4	homolog	A
AT5G23540.1	XP_007017301.2	96.117	99	0	614	NC_030857.1	496459	496600	LOC18591239	26S	proteasome	non-ATPase	regulatory	subunit	14	homolog
AT5G37640.1	XP_017973265.1	96.104	94	8.76e-47	154	NC_030852.1	30273662	30273764	LOC18605830	ubiquitin-60S	ribosomal	protein	40
AT5G37640.1	XP_017977940.1	96.104	94	8.76e-47	154	NC_030854.1	6357442	6357544	LOC18598282	ubiquitin-60S	ribosomal	protein	40
AT5G62700.1	XP_007015369.2	96.056	96	0	853	NC_030858.1	31460799	31461192	LOC18590035	tubulin	beta-5	chain	isoform	X2
AT5G62700.1	XP_017983481.1	96.056	96	0	853	NC_030858.1	31461337	31461730	LOC18590035	tubulin	beta-5	chain	isoform	X1
AT3G05530.1	XP_017977252.1	95.991	99	0	833	NC_030854.1	38384720	38384836	LOC18600478	26S	protease	regulatory	subunit	6A	homolog
AT5G19780.1	XP_017977367.1	95.881	97	0	862	NC_030854.1	34627193	34627305	LOC18599856	tubulin	alpha-3	chain
AT1G53850.1	XP_017978938.1	95.781	99	5.63e-173	475	NC_030855.1	20643460	20643473	LOC18596311	proteasome	subunit	alpha	type-5
AT5G09810.1	XP_007009346.1	95.756	99	0	759	NC_030859.1	2088155	2088214	LOC18586098	actin-66
AT1G52600.1	XP_017985384.1	95.556	99	4.95e-126	352	NW_017234914.1	10085	10163	LOC18603793	signal	peptidase	complex	catalytic	subunit	SEC11A
AT1G07920.1	XP_007015466.1	95.546	99	0	893	NC_030858.1	32040389	32040850	LOC18590089	elongation	factor	1-alpha
AT1G07920.1	XP_007009760.1	95.546	99	0	895	NC_030859.1	3673392	3673853	LOC18586354	elongation	factor	1-alpha
ATCG00480.1	YP_004021323.1	95.382	99	0	936	NC_014676.2	56955	58451	atpB	ATP	synthase	CF1	beta	subunit
AT1G75840.1	XP_007041844.1	95.361	98	1.65e-138	384	NC_030851.1	2998307	2998405	LOC18607552	rac-like	GTP-binding	protein	5
AT4G02080.1	XP_007051084.1	95.337	99	6.61e-139	385	NC_030850.1	31885440	31885568	LOC18613680	GTP-binding	protein	SAR1A
AT4G02080.1	XP_007035750.1	95.337	99	2.16e-139	386	NC_030853.1	31090584	31090712	LOC18603615	GTP-binding	protein	SAR1A
AT1G07920.1	XP_017982927.1	95.323	99	0	892	NC_030858.1	32030019	32030480	LOC18590086	elongation	factor	1-alpha
AT5G48870.1	XP_017970003.1	95.294	96	1.1e-55	166	NC_030850.1	17487273	17487306	LOC18612818	sm-like	protein	LSM5
AT5G62700.1	XP_007022910.1	95.139	96	0	845	NC_030855.1	388528	388921	LOC18595063	tubulin	beta	chain
AT1G07920.1	XP_007009751.1	95.1	99	0	890	NC_030859.1	3656009	3656470	LOC18586351	elongation	factor	1-alpha
AT5G37680.1	XP_017974705.1	95.082	99	8.86e-131	364	NC_030853.1	22450720	22450757	LOC18602163	ADP-ribosylation	factor-like	protein	8B
AT2G24765.1	XP_017983776.1	95.055	99	2.38e-130	363	NC_030858.1	11167954	11168056	LOC18589190	ADP-ribosylation	factor	1
AT5G62700.1	XP_007036799.1	94.884	95	0	839	NC_030852.1	5304907	5305300	LOC18604329	tubulin	beta	chain
AT5G37640.1	XP_017976796.1	94.872	94	3.94e-46	153	NC_030850.1	32435444	32435914	LOC18613776	ubiquitin-40S	ribosomal	protein	S27a
AT5G37640.1	XP_017969957.1	94.872	94	4.78e-46	153	NC_030851.1	32406238	32406708	LOC18609501	ubiquitin-40S	ribosomal	protein	S27a
AT1G03150.1	XP_017981827.1	94.828	99	3.13e-127	354	NC_030850.1	29597729	29597806	LOC18613339	N-alpha-acetyltransferase	20
AT5G49460.1	XP_017975529.1	94.737	99	0	1174	NC_030853.1	31236662	31236761	LOC18603655	ATP-citrate	synthase	beta	chain	protein	2
ATCG00120.1	YP_004021302.1	94.664	99	0	966	NC_014676.2	10322	11842	atpA	ATP	synthase	CF1	alpha	subunit
AT1G07920.1	XP_017977148.1	94.655	99	0	884	NC_030854.1	2589818	2590279	LOC18597908	elongation	factor	1-alpha
AT1G75840.1	XP_007017852.1	94.475	92	1.51e-128	359	NC_030857.1	2126668	2126766	LOC18591583	rac-like	GTP-binding	protein	5
AT1G79210.1	XP_007024947.1	94.468	99	1.11e-164	454	NC_030855.1	21539913	21539953	LOC18596431	proteasome	subunit	alpha	type-2-A
AT5G45550.1	XP_007040797.1	94.419	99	2.76e-155	428	NC_030852.1	35883101	35883123	LOC18606875	MOB	kinase	activator-like	1A
AT5G11170.1	XP_007011879.1	94.393	99	0	809	NC_030858.1	1369978	1370093	LOC18587805	DEAD-box	ATP-dependent	RNA	helicase	56
AT5G37640.1	XP_007025987.2	94.323	94	3.25e-151	423	NC_030855.1	25053877	25054566	LOC18597093	polyubiquitin	11
AT5G58030.1	XP_007011967.1	94.301	98	7.14e-137	380	NC_030858.1	1679749	1679820	LOC18587869	trafficking	protein	particle	complex	subunit	5
AT5G19780.1	XP_007018369.1	94.292	97	0	847	NC_030857.1	3850901	3850993	LOC18591892	tubulin	alpha-4	chain
AT3G46440.1	XP_007016481.2	94.286	92	0	622	NC_030858.1	36525247	36525279	LOC18590728	UDP-glucuronic	acid	decarboxylase	5	isoform	X2
ATCG00780.1	YP_004021352.1	94.262	99	2.23e-82	236	NC_014676.2	85713	86081	rpl14	ribosomal	protein	14
AT1G27530.1	XP_007018345.1	94.253	99	3.42e-126	352	NC_030857.1	3752735	3753067	LOC18591875	ubiquitin-fold	modifier-conjugating	enzyme	1
ATCG00490.1	YP_004021324.2	94.118	99	0	918	NC_014676.2	59398	60852	rbcL	ribulose	1%2C5-bisphosphate	carboxylase/oxygenase	large	subunit
ATCG00330.1	YP_004021314.1	94	99	2.98e-66	194	NC_014676.2	39208	39510	rps14	ribosomal	protein	S14
AT2G34250.1	XP_007025305.1	93.908	99	0	912	NC_030855.1	22744611	22744954	LOC18596636	protein	transport	protein	Sec61	subunit	alpha	isoform	X2
AT1G78900.1	XP_017979179.1	93.9	99	0	1208	NC_030855.1	6957224	6957301	LOC18595594	V-type	proton	ATPase	catalytic	subunit	A
AT5G19780.1	XP_017985460.1	93.864	98	0	848	NC_030850.1	3992125	3992217	LOC18611369	tubulin	alpha	chain
AT1G75840.1	XP_007046638.1	93.82	90	8.65e-126	352	NC_030850.1	660100	660198	LOC18610734	rac-like	GTP-binding	protein	RHO1
AT4G02080.1	XP_007031131.1	93.782	99	2.01e-136	379	NC_030854.1	38789344	38789472	LOC18600560	GTP-binding	protein	SAR1A
AT5G01230.1	XP_017977782.1	93.77	98	0	592	NC_030854.1	941476	941502	LOC18597584	putative	tRNA	(cytidine(32)/guanosine(34)-2'-O)-methyltransferase
AT1G56070.1	XP_007022235.1	93.713	99	0	1665	NC_030856.1	10027935	10027937	LOC18594569	elongation	factor	2
AT5G43010.1	XP_007017631.1	93.484	99	0	763	NC_030857.1	1454245	1454344	LOC18591450	26S	protease	regulatory	subunit	S10B	homolog	B
AT5G02500.1	XP_017982500.1	93.401	81	0	773	NC_030858.1	36455264	36455477	LOC18590712	probable	mediator	of	RNA	polymerase	II	transcription	subunit	37e	isoform	X2
ATCG00440.1	YP_004021321.1	93.333	99	2.71e-76	221	NC_014676.2	53783	54145	ndhC	NADH-plastoquinone	oxidoreductase	subunit	3
ATCG01090.1	YP_004021365.1	93.333	95	1.87e-116	327	NC_014676.2	124636	125139	ndhI	NADH-plastoquinone	oxidoreductase	subunit	I
AT3G27000.1	XP_007031931.2	93.316	99	0	766	NC_030853.1	2626146	2626187	LOC18601060	actin-related	protein	2
AT3G49100.1	XP_007050400.1	93.204	99	3.86e-71	206	NC_030850.1	28646691	28646762	LOC18613221	signal	recognition	particle	9	kDa	protein
AT3G18820.1	XP_007042216.1	93.204	99	3.19e-146	405	NC_030851.1	4320873	4320925	LOC18607796	ras-related	protein	Rab7
AT3G11830.1	XP_017969425.1	93.161	97	0	1016	NC_030850.1	7014414	7014428	LOC18611810	T-complex	protein	1	subunit	eta
AT2G37270.1	XP_007029135.1	93.158	91	3.8e-133	372	NC_030854.1	29481472	29481573	LOC18599204	40S	ribosomal	protein	S5
AT1G73030.1	XP_007024411.2	93.103	99	1.1e-127	358	NC_030855.1	18918141	18918465	LOC18596088	ESCRT-related	protein	CHMP1B
AT5G62700.1	XP_007040224.1	93.088	96	0	835	NC_030852.1	34093398	34093791	LOC18606517	tubulin	beta-7	chain
AT3G25800.1	XP_017971926.1	93.015	99	0	1122	NC_030851.1	40754256	40754648	LOC18610516	serine/threonine-protein	phosphatase	2A	65	kDa	regulatory	subunit	A	beta	isoform
AT5G11170.1	XP_007023163.1	92.974	99	0	782	NC_030855.1	1935474	1935586	LOC18595240	DEAD-box	ATP-dependent	RNA	helicase	56
AT5G42020.3	XP_007040596.2	92.945	97	0	1239	NC_030852.1	35286508	35286565	LOC18606752	luminal-binding	protein	5
AT4G35860.1	XP_007031654.1	92.891	99	3.04e-150	415	NC_030853.1	1320918	1320963	LOC18600873	ras-related	protein	RABB1b
AT4G01850.1	XP_007051250.1	92.875	99	0	742	NC_030850.1	32475398	32476579	LOC18613784	S-adenosylmethionine	synthase	2
AT4G01850.1	XP_017974891.1	92.875	99	0	738	NC_030853.1	31714503	31715684	LOC18603754	S-adenosylmethionine	synthase	2
AT4G26720.1	XP_007020689.1	92.787	99	0	601	NC_030856.1	1500487	1500627	LOC18593416	serine/threonine-protein	phosphatase	PP-X	isozyme	2	isoform	X1
AT5G50460.1	XP_017972210.1	92.754	99	5.85e-42	130	NC_030852.1	25942961	25943054	LOC18605111	protein	transport	protein	Sec61	subunit	gamma-1
AT1G11890.1	XP_017979217.1	92.661	99	3.67e-156	431	NC_030855.1	20413015	20413202	LOC18596272	25.3	kDa	vesicle	transport	protein
AT1G11890.1	XP_017979218.1	92.661	99	3.67e-156	431	NC_030855.1	20413015	20413202	LOC18596272	25.3	kDa	vesicle	transport	protein
AT1G11890.1	XP_007024708.1	92.661	99	3.67e-156	431	NC_030855.1	20413015	20413202	LOC18596272	25.3	kDa	vesicle	transport	protein
AT5G50460.1	XP_007031898.1	92.647	97	7.48e-41	127	NC_030853.1	2381402	2381495	LOC18601031	protein	transport	protein	Sec61	subunit	gamma
AT4G01850.1	XP_017976805.1	92.602	99	0	738	NC_030854.1	39086613	39087794	LOC18600625	S-adenosylmethionine	synthase	1
AT5G01410.1	XP_007026699.1	92.557	99	0	584	NC_030854.1	745723	746652	LOC18597542	probable	pyridoxal	5'-phosphate	synthase	subunit	PDX1
AT1G02780.1	XP_007051011.2	92.553	87	9.37e-117	331	NC_030850.1	31557469	31557580	LOC18613620	60S	ribosomal	protein	L19-1
AT5G19780.1	XP_007042689.1	92.444	99	0	853	NC_030851.1	6028899	6028991	LOC18608121	tubulin	alpha-2	chain
AT5G19780.1	XP_007032501.2	92.444	99	0	855	NC_030853.1	14561182	14561509	LOC18601487	tubulin	alpha	chain
AT5G49460.1	XP_017980683.1	92.434	99	0	1137	NC_030850.1	32079003	32079102	LOC18613719	ATP-citrate	synthase	beta	chain	protein	2
AT5G49460.1	XP_017980833.1	92.434	99	0	1137	NC_030850.1	32079003	32079102	LOC18613719	ATP-citrate	synthase	beta	chain	protein	2
AT5G49460.1	XP_017980765.1	92.434	99	0	1137	NC_030850.1	32079003	32079102	LOC18613719	ATP-citrate	synthase	beta	chain	protein	2
AT5G49460.1	XP_007051143.2	92.434	99	0	1137	NC_030850.1	32079003	32079102	LOC18613719	ATP-citrate	synthase	beta	chain	protein	2
AT5G49460.1	XP_007051142.2	92.434	99	0	1137	NC_030850.1	32079003	32079102	LOC18613719	ATP-citrate	synthase	beta	chain	protein	2
ATCG00420.1	YP_004021319.1	92.405	99	5.64e-109	306	NC_014676.2	52428	52904	ndhJ	NADH-plastoquinone	oxidoreductase	subunit	J
AT5G18580.1	XP_007035515.1	92.111	98	0	884	NC_030853.1	30386743	30386884	LOC18603456	probable	serine/threonine-protein	phosphatase	2A	regulatory	subunit	B''	subunit	TON2
AT3G53230.1	XP_017977280.1	92.034	99	0	1537	NC_030854.1	3097911	3097939	LOC18597993	cell	division	cycle	protein	48	homolog
AT1G02780.1	XP_007035664.2	91.935	87	3.27e-114	324	NC_030853.1	30847591	30847702	LOC18603557	60S	ribosomal	protein	L19-1
AT5G56150.1	XP_007019976.2	91.892	99	7.61e-103	290	NC_030857.1	15657463	15657532	LOC18592943	ubiquitin-conjugating	enzyme	E2-17	kDa	isoform	X2
AT5G56150.1	XP_017981783.1	91.892	99	5.55e-103	291	NC_030857.1	15657745	15657753	LOC18592943	ubiquitin-conjugating	enzyme	E2-17	kDa	isoform	X1
AT5G56150.1	XP_017981784.1	91.892	99	7.61e-103	290	NC_030857.1	15657463	15657532	LOC18592943	ubiquitin-conjugating	enzyme	E2-17	kDa	isoform	X2
AT3G07590.1	XP_017969304.1	91.837	85	3.62e-61	182	NC_030850.1	13982976	13982989	LOC18612535	small	nuclear	ribonucleoprotein	Sm	D1	isoform	X2
AT3G51260.1	XP_007046652.1	91.818	88	2.78e-151	421	NC_030850.1	695528	695700	LOC18610743	proteasome	subunit	alpha	type-7
AT3G02530.1	XP_017973939.1	91.776	99	0	1016	NC_030852.1	8512605	8512802	LOC18604436	T-complex	protein	1	subunit	zeta	1
AT3G02530.1	XP_007033297.1	91.776	99	0	1015	NC_030853.1	21813839	21814036	LOC18602075	T-complex	protein	1	subunit	zeta	1
AT4G13940.1	XP_017975364.1	91.753	99	0	946	NC_030853.1	25776931	25777641	LOC18602642	adenosylhomocysteinase
AT3G62840.1	XP_007045527.1	91.743	99	2.49e-62	185	NC_030851.1	38057844	38057848	LOC18610032	small	nuclear	ribonucleoprotein	Sm	D2
AT3G46440.1	XP_007016479.2	91.74	99	0	633	NC_030858.1	36524497	36524586	LOC18590728	UDP-glucuronic	acid	decarboxylase	6	isoform	X1
AT3G46440.1	XP_007016478.2	91.74	99	0	633	NC_030858.1	36524497	36524586	LOC18590728	UDP-glucuronic	acid	decarboxylase	6	isoform	X1
AT3G46440.1	XP_007016477.2	91.74	99	0	633	NC_030858.1	36524497	36524586	LOC18590728	UDP-glucuronic	acid	decarboxylase	6	isoform	X1
AT3G46440.1	XP_017983679.1	91.74	99	0	633	NC_030858.1	36524497	36524586	LOC18590728	UDP-glucuronic	acid	decarboxylase	6	isoform	X1
AT4G02080.1	XP_007035749.1	91.71	99	4.59e-134	373	NC_030853.1	31087200	31087328	LOC18603614	GTP-binding	protein	SAR1A
AT1G77440.1	XP_007019135.1	91.667	99	1.12e-142	395	NC_030857.1	6769743	6769748	LOC18592376	proteasome	subunit	beta	type-3-A	isoform	X1
AT5G58290.1	XP_007010399.1	91.627	99	0	780	NC_030859.1	13455056	13455553	LOC18586783	26S	protease	regulatory	subunit	6B	homolog
AT5G58290.1	XP_017985178.1	91.627	99	0	779	NC_030859.1	13479245	13479742	LOC18586785	26S	protease	regulatory	subunit	6B	homolog
AT5G47200.1	XP_007039720.1	91.626	99	2.75e-139	387	NC_030852.1	32216640	32216653	LOC18606190	GTP-binding	protein	YPTM2
AT5G55990.1	XP_017980183.1	91.593	99	5.46e-152	421	NC_030856.1	521231	521354	LOC18593231	calcineurin	B-like	protein	3	isoform	X1
AT5G08530.1	XP_007045030.1	91.564	99	0	908	NC_030851.1	34628824	34628826	LOC18609713	NADH	dehydrogenase	[ubiquinone]	flavoprotein	1%2C	mitochondrial
AT3G28860.1	XP_017975299.1	91.521	99	0	2095	NC_030853.1	14512966	14513127	LOC18601485	ABC	transporter	B	family	member	19	isoform	X2
AT2G06530.1	XP_017983676.1	91.518	99	1.13e-127	359	NC_030858.1	4202849	4202885	LOC18588318	vacuolar	protein	sorting-associated	protein	2	homolog	1
AT4G05420.1	XP_007041119.1	91.452	99	0	2071	NC_030851.1	636218	636321	LOC18607075	DNA	damage-binding	protein	1
AT3G25800.1	XP_007036502.1	91.312	99	0	1110	NC_030852.1	2126669	2127061	LOC18604106	serine/threonine-protein	phosphatase	2A	65	kDa	regulatory	subunit	A	beta	isoform
AT5G67380.1	XP_007018539.2	91.265	81	0	598	NC_030857.1	4476377	4476462	LOC18592005	casein	kinase	II	subunit	alpha
AT3G22950.1	XP_007034914.1	91.257	99	3.4e-126	352	NC_030853.1	28402375	28402566	LOC18603090	ADP-ribosylation	factor-like	protein	5
AT3G22950.1	XP_007034915.1	91.257	99	3.4e-126	352	NC_030853.1	28402375	28402566	LOC18603090	ADP-ribosylation	factor-like	protein	5
AT5G35530.1	XP_007012688.1	91.244	87	1.62e-149	416	NC_030858.1	4180283	4180312	LOC18588313	40S	ribosomal	protein	S3-3
AT5G18170.1	XP_017976889.1	91.241	99	0	786	NC_030854.1	37425714	37425821	LOC18600298	glutamate	dehydrogenase	1
AT5G18170.1	XP_007030723.1	91.241	99	0	786	NC_030854.1	37425714	37425821	LOC18600298	glutamate	dehydrogenase	1
AT5G18170.1	XP_007030721.1	91.241	99	0	786	NC_030854.1	37425714	37425821	LOC18600298	glutamate	dehydrogenase	1
AT5G39320.1	XP_007032693.1	91.213	99	0	922	NC_030853.1	16587534	16588976	LOC18601622	UDP-glucose	6-dehydrogenase	2
AT5G20090.1	XP_007037924.2	91.176	92	2.97e-70	205	NC_030852.1	25672521	25672616	LOC18605068	mitochondrial	pyruvate	carrier	1
AT1G77440.1	XP_017981744.1	91.176	99	5.44e-142	394	NC_030857.1	6769452	6769639	LOC18592376	proteasome	subunit	beta	type-3-A	isoform	X2
AT5G10360.1	XP_007047874.1	91.165	99	2.61e-155	431	NC_030850.1	5017670	5017675	LOC18611522	40S	ribosomal	protein	S6
AT5G22330.1	XP_017983833.1	91.048	99	0	859	NC_030858.1	33808487	33808576	LOC18590271	ruvB-like	protein	1
AT3G04120.1	XP_017969947.1	91.045	99	0	634	NC_030851.1	34477379	34477382	LOC18609691	glyceraldehyde-3-phosphate	dehydrogenase%2C	cytosolic
AT3G23990.1	XP_017975733.1	91.003	99	0	1054	NC_030853.1	27005806	27005843	LOC18602827	chaperonin	CPN60-2%2C	mitochondrial
AT1G72660.1	XP_007024595.2	90.955	99	0	744	NC_030855.1	19850010	19850079	LOC18596204	developmentally-regulated	G-protein	1
AT4G31300.2	XP_007011513.1	90.948	99	7.3e-160	442	NC_030858.1	185721	185829	LOC18587581	proteasome	subunit	beta	type-6
AT1G20575.1	XP_007018018.2	90.909	98	6.04e-165	455	NC_030857.1	2658129	2658232	LOC18591699	dolichol-phosphate	mannosyltransferase	subunit	1
AT4G22720.1	XP_007033929.1	90.828	95	0	658	NC_030853.1	24626849	24627403	LOC18602473	probable	tRNA	N6-adenosine	threonylcarbamoyltransferase
AT5G02280.1	XP_007027014.1	90.78	99	4.28e-96	273	NC_030854.1	1762986	1763045	LOC18597752	trafficking	protein	particle	complex	subunit	4
AT5G10360.1	XP_007018728.1	90.763	99	5.16e-155	431	NC_030857.1	5068250	5068255	LOC18592125	40S	ribosomal	protein	S6
AT1G60430.1	XP_007013593.2	90.751	99	3.51e-119	334	NC_030858.1	7558650	7558652	LOC18588846	actin-related	protein	2025-03-02	complex	subunit	3
AT1G60430.1	XP_007013592.1	90.751	99	3.51e-119	334	NC_030858.1	7558650	7558652	LOC18588846	actin-related	protein	2025-03-02	complex	subunit	3
AT1G60430.1	XP_007013594.2	90.751	99	3.51e-119	334	NC_030858.1	7558650	7558652	LOC18588846	actin-related	protein	2025-03-02	complex	subunit	3
AT1G60430.1	XP_017982014.1	90.751	99	3.51e-119	334	NC_030858.1	7558650	7558652	LOC18588846	actin-related	protein	2025-03-02	complex	subunit	3
AT5G55990.1	XP_007026411.1	90.708	99	3.23e-151	419	NC_030855.1	26184157	26184280	LOC18597363	calcineurin	B-like	protein	3	isoform	X1
AT5G06300.1	XP_007027931.1	90.698	99	2.08e-147	409	NC_030854.1	8195882	8195989	LOC18598371	cytokinin	riboside	5'-monophosphate	phosphoribohydrolase	LOG7
AT4G35090.1	XP_007018034.2	90.65	99	0	956	NC_030857.1	2690052	2690066	LOC18591705	catalase	isozyme	1
AT4G26720.1	XP_017980739.1	90.637	87	0	515	NC_030856.1	1501282	1501377	LOC18593416	serine/threonine-protein	phosphatase	PP-X	isozyme	2	isoform	X2
AT3G13450.1	XP_007014022.2	90.634	92	0	632	NC_030858.1	22054793	22054962	LOC18589127	2-oxoisovalerate	dehydrogenase	subunit	beta	1%2C	mitochondrial
AT3G18190.1	XP_017973880.1	90.619	99	0	972	NC_030852.1	3344732	3346333	LOC18604228	T-complex	protein	1	subunit	delta
AT3G53230.1	XP_007016834.1	90.564	99	0	1534	NC_030858.1	37780571	37780599	LOC18590940	cell	division	cycle	protein	48	homolog
AT2G44270.1	XP_007017959.2	90.544	98	0	655	NC_030857.1	2468764	2468862	LOC18591656	cytoplasmic	tRNA	2-thiolation	protein	1	isoform	X1
AT5G56150.1	XP_007020324.1	90.541	99	5.86e-102	288	NC_030856.1	162372	162441	LOC18593175	ubiquitin-conjugating	enzyme	E2-17	kDa
AT3G28860.1	XP_017975298.1	90.537	99	0	2278	NC_030853.1	14513758	14514003	LOC18601485	ABC	transporter	B	family	member	19	isoform	X1
AT5G66760.1	XP_007046957.1	90.536	99	0	1171	NC_030850.1	1649582	1649686	LOC18610944	succinate	dehydrogenase	[ubiquinone]	flavoprotein	subunit	1%2C	mitochondrial
AT1G51160.1	XP_007038853.1	90.533	99	2.66e-117	328	NC_030852.1	29285059	29285282	LOC18605653	trafficking	protein	particle	complex	subunit	1
AT1G51160.1	XP_007038854.1	90.533	99	2.66e-117	328	NC_030852.1	29285059	29285282	LOC18605653	trafficking	protein	particle	complex	subunit	1
AT1G51160.1	XP_007038855.1	90.533	99	2.66e-117	328	NC_030852.1	29285059	29285282	LOC18605653	trafficking	protein	particle	complex	subunit	1
AT4G31750.1	XP_017983094.1	90.508	95	0	550	NC_030858.1	613021	613100	LOC18587664	probable	protein	phosphatase	2C	59
AT5G37640.1	XP_007049060.2	90.492	95	0	538	NC_030850.1	11147554	11148699	LOC18612278	polyubiquitin
AT5G37640.1	XP_007021032.1	90.492	95	0	538	NC_030856.1	2882553	2883698	LOC18593653	polyubiquitin
AT5G37640.1	XP_007021035.1	90.492	95	0	538	NC_030856.1	2895543	2896688	LOC18593655	polyubiquitin
AT5G37640.1	XP_007014924.1	90.492	94	0	538	NC_030858.1	27803036	27803953	LOC18589750	polyubiquitin	3
AT3G22110.1	XP_017969775.1	90.4	99	2.99e-173	477	NC_030850.1	8642143	8642895	LOC18612026	proteasome	subunit	alpha	type-4
AT3G22110.1	XP_007041003.2	90.4	99	4.79e-173	476	NC_030851.1	165175	165927	LOC18607003	proteasome	subunit	alpha	type-4
AT3G22110.1	XP_017970704.1	90.4	99	4.79e-173	476	NC_030851.1	165175	165927	LOC18607003	proteasome	subunit	alpha	type-4
AT3G22110.1	XP_007041002.2	90.4	99	4.79e-173	476	NC_030851.1	165175	165927	LOC18607003	proteasome	subunit	alpha	type-4
AT3G51260.1	XP_007041864.1	90.393	91	3.91e-155	431	NC_030851.1	3062571	3062743	LOC18607559	proteasome	subunit	alpha	type-7
AT4G38780.1	XP_017978648.1	90.355	99	0	4449	NC_030855.1	2277972	2278234	LOC18595280	pre-mRNA-processing-splicing	factor	8A
AT5G23250.1	XP_017971287.1	90.333	88	0	511	NC_030851.1	8420797	8421063	LOC18608485	probable	succinyl-CoA	ligase	[ADP-forming]	subunit	alpha%2C	mitochondrial
AT2G39770.1	XP_007009212.1	90.305	99	0	677	NC_030859.1	1707441	1707551	LOC18586025	mannose-1-phosphate	guanylyltransferase	1
AT2G39770.1	XP_007009211.1	90.305	99	0	677	NC_030859.1	1707441	1707551	LOC18586025	mannose-1-phosphate	guanylyltransferase	1
AT4G13930.1	XP_007034218.2	90.234	99	0	904	NC_030853.1	25783933	25784610	LOC18602644	serine	hydroxymethyltransferase	4
AT2G36910.1	XP_017977251.1	90.221	98	0	2329	NC_030854.1	3304560	3305072	LOC18598024	ABC	transporter	B	family	member	1
AT3G02190.1	XP_007012004.1	90.196	98	8.08e-29	96.3	NC_030858.1	1797441	1797443	LOC18587895	60S	ribosomal	protein	L39-3
AT5G37600.1	XP_017975130.1	90.169	99	0	677	NC_030853.1	3709017	3709090	LOC18601193	glutamine	synthetase	cytosolic	isozyme	2
AT1G65930.1	XP_017975565.1	90.024	99	0	778	NC_030853.1	59426	59474	LOC18600670	isocitrate	dehydrogenase	[NADP]
AT2G18290.1	XP_017970259.1	89.937	82	1.88e-99	285	NC_030850.1	1486625	1486803	LOC18610911	anaphase-promoting	complex	subunit	10	isoform	X2
AT5G05780.1	XP_017984145.1	89.931	93	0	528	NC_030859.1	1244121	1244307	LOC18585936	26S	proteasome	non-ATPase	regulatory	subunit	7	homolog	A	isoform	X1
AT4G01900.1	XP_017969729.1	89.899	95	8.53e-57	180	NC_030850.1	32341865	32342054	LOC18613760	nitrogen	regulatory	protein	P-II	homolog	isoform	X1
AT4G35830.1	XP_007046597.2	89.844	99	0	1694	NC_030850.1	538995	538998	LOC18610706	aconitate	hydratase	1
AT3G14940.1	XP_007021729.2	89.823	99	0	1791	NC_030856.1	6563145	6563333	LOC18594176	phosphoenolpyruvate	carboxylase
AT3G14940.1	XP_007021728.2	89.823	99	0	1791	NC_030856.1	6563145	6563333	LOC18594176	phosphoenolpyruvate	carboxylase
ATCG01100.1	YP_004021364.1	89.807	99	0	600	NC_014676.2	126907	127458	ndhA	NADH-plastoquinone	oxidoreductase	subunit	1
AT3G07590.1	XP_007050651.2	89.796	85	1.94e-60	181	NC_030850.1	29970189	29970202	LOC18613382	small	nuclear	ribonucleoprotein	Sm	D1
AT3G55280.1	XP_007016535.1	89.796	95	5.98e-69	205	NC_030858.1	36672331	36672343	LOC18590760	60S	ribosomal	protein	L23A
AT3G55620.1	XP_007010048.2	89.796	99	4.86e-169	466	NC_030859.1	5254511	5254520	LOC18586535	eukaryotic	translation	initiation	factor	2025-02-06
AT3G52990.1	XP_007027579.2	89.753	99	0	991	NC_030854.1	4300486	4300554	LOC18598132	pyruvate	kinase	1%2C	cytosolic
AT5G53530.1	XP_007039154.1	89.712	80	1.08e-165	460	NC_030852.1	30235459	30235461	LOC18605827	vacuolar	protein	sorting-associated	protein	26A	isoform	X2
AT2G38120.1	XP_007026762.2	89.709	92	0	821	NC_030854.1	894016	894189	LOC18597575	auxin	transporter-like	protein	2
AT1G27330.1	XP_007043980.1	89.706	99	2.07e-40	126	NC_030851.1	16531734	16531736	LOC18608982	stress-associated	endoplasmic	reticulum	protein	2
AT2G34250.1	XP_017980366.1	89.706	99	0	877	NC_030856.1	7828458	7828801	LOC18594328	protein	transport	protein	Sec61	subunit	alpha
AT2G34250.1	XP_007021907.2	89.706	99	0	877	NC_030856.1	7828458	7828801	LOC18594328	protein	transport	protein	Sec61	subunit	alpha
AT1G43670.1	XP_007019450.1	89.706	99	0	639	NC_030857.1	10190331	10190489	LOC18592577	fructose-1%2C6-bisphosphatase%2C	cytosolic
AT1G43670.1	XP_007019452.2	89.706	99	0	639	NC_030857.1	10190331	10190489	LOC18592577	fructose-1%2C6-bisphosphatase%2C	cytosolic
AT1G43670.1	XP_017981497.1	89.706	99	0	639	NC_030857.1	10190331	10190489	LOC18592577	fructose-1%2C6-bisphosphatase%2C	cytosolic
AT2G39450.1	XP_017984862.1	89.676	86	0	614	NC_030859.1	2997540	2997552	LOC18586242	metal	tolerance	protein	11	isoform	X2
AT5G47200.1	XP_007038259.1	89.655	99	3.01e-135	377	NC_030852.1	26949400	26949413	LOC18605279	GTP-binding	protein	YPTM2
AT4G35090.1	XP_007046520.1	89.634	99	0	949	NC_030850.1	317265	317279	LOC18610656	catalase	isozyme	2
AT5G41670.1	XP_017972824.1	89.627	99	0	905	NC_030852.1	34720851	34722303	LOC18606635	6-phosphogluconate	dehydrogenase%2C	decarboxylating	2%2C	chloroplastic
AT5G05780.1	XP_007026771.1	89.61	99	0	568	NC_030854.1	936946	937132	LOC18597583	26S	proteasome	non-ATPase	regulatory	subunit	7	homolog	A
AT5G10170.1	XP_007048015.2	89.608	99	0	969	NC_030850.1	5607485	5607672	LOC18611610	inositol-3-phosphate	synthase
AT5G10360.1	XP_017971551.1	89.558	99	4.28e-152	423	NC_030851.1	6863098	6863103	LOC18608256	40S	ribosomal	protein	S6
AT2G39450.1	XP_007009546.1	89.506	82	0	583	NC_030859.1	2997701	2997766	LOC18586242	metal	tolerance	protein	11	isoform	X3
AT3G58610.1	XP_007048672.2	89.464	88	0	983	NC_030850.1	8704803	8704904	LOC18612035	ketol-acid	reductoisomerase%2C	chloroplastic
AT1G04410.1	XP_007035115.2	89.458	99	0	602	NC_030853.1	29173008	29173050	LOC18603218	malate	dehydrogenase
AT1G15690.1	XP_007023297.2	89.426	99	0	1390	NC_030855.1	2736273	2736528	LOC18595335	pyrophosphate-energized	vacuolar	membrane	proton	pump
AT4G31390.1	XP_017983792.1	89.425	78	0	990	NC_030858.1	318165	318272	LOC18587614	uncharacterized	aarF	domain-containing	protein	kinase	At4g31390%2C	chloroplastic	isoform	X2
AT3G25980.1	XP_007044984.1	89.423	99	1.91e-138	385	NC_030851.1	34433587	34433659	LOC18609687	mitotic	spindle	checkpoint	protein	MAD2
AT5G15650.1	XP_007032852.1	89.398	96	0	655	NC_030853.1	18215776	18216117	LOC18601742	UDP-arabinopyranose	mutase	1
AT1G78570.1	XP_007022008.1	89.387	99	0	1266	NC_030856.1	8523913	8525472	LOC18594406	trifunctional	UDP-glucose	4%2C6-dehydratase/UDP-4-keto-6-deoxy-D-glucose	3%2C5-epimerase/UDP-4-keto-L-rhamnose-reductase	RHM1
AT3G57870.1	XP_017983811.1	89.375	99	1.24e-108	306	NC_030850.1	2962816	2962884	LOC18611177	SUMO-conjugating	enzyme	SCE1	isoform	X2
AT3G12780.1	XP_017980600.1	89.367	91	0	787	NC_030856.1	14822959	14823399	LOC18594856	phosphoglycerate	kinase%2C	chloroplastic
AT5G53530.1	XP_007039153.1	89.344	81	1.48e-165	459	NC_030852.1	30235459	30235461	LOC18605827	vacuolar	protein	sorting-associated	protein	26A	isoform	X3
AT5G45130.2	XP_007024868.2	89.305	89	3.92e-124	349	NC_030855.1	21148773	21148811	LOC18596376	ras-related	protein	RABF2b
AT5G56030.2	XP_007020406.1	89.3	99	0	1189	NC_030856.1	515942	516064	LOC18593230	heat	shock	cognate	protein	80
AT5G53530.1	XP_007039152.1	89.298	99	0	564	NC_030852.1	30235459	30235461	LOC18605827	vacuolar	protein	sorting-associated	protein	26A	isoform	X1
AT1G50480.1	XP_017984778.1	89.258	99	0	1138	NC_030859.1	19073687	19073845	LOC18587219	formate--tetrahydrofolate	ligase
AT5G56150.1	XP_017969465.1	89.189	99	5.45e-100	283	NC_030850.1	33966659	33966728	LOC18614028	ubiquitin-conjugating	enzyme	E2	28
AT5G56150.1	XP_007038940.1	89.189	99	1.3e-99	282	NC_030852.1	29524836	29524905	LOC18605704	ubiquitin-conjugating	enzyme	E2	10
AT5G56150.1	XP_017973704.1	89.189	99	8e-100	283	NC_030852.1	34763585	34763654	LOC18606642	ubiquitin-conjugating	enzyme	E2-17	kDa
AT5G55280.1	XP_017980594.1	89.189	85	0	605	NC_030856.1	1401594	1401836	LOC18593404	cell	division	protein	FtsZ	homolog	1%2C	chloroplastic
AT5G50920.1	XP_007038115.2	89.177	99	0	1606	NC_030852.1	26461407	26461971	LOC18605189	chaperone	protein	ClpC1%2C	chloroplastic
AT4G02570.1	XP_007050830.2	89.175	99	0	1373	NC_030850.1	30751545	30751675	LOC18613499	cullin-1
AT5G47200.1	XP_017978788.1	89.163	99	2.19e-136	380	NC_030850.1	36359885	36359898	LOC18614484	GTP-binding	protein	YPTM2
AT2G36530.1	XP_007027607.2	89.14	99	0	823	NC_030854.1	4510006	4510074	LOC18598150	enolase
AT5G22360.1	XP_007015768.1	89.14	99	1.61e-137	384	NC_030858.1	33881992	33882208	LOC18590280	vesicle-associated	membrane	protein	714
AT5G22360.1	XP_007015769.1	89.14	99	1.61e-137	384	NC_030858.1	33881992	33882208	LOC18590280	vesicle-associated	membrane	protein	714
AT4G24550.2	XP_017981460.1	89.135	99	0	833	NC_030857.1	3231548	3231605	LOC18591570	AP-4	complex	subunit	mu
AT2G18290.1	XP_007046902.1	89.062	99	8.5e-124	347	NC_030850.1	1486625	1486803	LOC18610911	anaphase-promoting	complex	subunit	10	isoform	X1
AT3G27925.1	XP_017975916.1	89.041	83	0	655	NC_030853.1	599881	600323	LOC18600761	protease	Do-like	1%2C	chloroplastic
AT4G21980.2	XP_007026092.2	88.983	86	4.21e-75	219	NC_030855.1	25356766	25356802	LOC18597160	autophagy-related	protein	8C
AT3G55620.1	XP_007046447.1	88.98	99	1.25e-169	467	NC_030850.1	130466	130475	LOC18610620	eukaryotic	translation	initiation	factor	2025-02-06
AT5G05780.1	XP_007009083.2	88.961	99	0	561	NC_030859.1	1244121	1244307	LOC18585936	26S	proteasome	non-ATPase	regulatory	subunit	7	homolog	A	isoform	X2
AT3G55280.1	XP_007009533.1	88.961	99	1.63e-72	214	NC_030859.1	2948456	2948471	LOC18586233	60S	ribosomal	protein	L23a
AT4G35860.1	XP_007026421.1	88.95	85	7.23e-124	348	NC_030855.1	26207296	26207341	LOC18597368	ras-related	protein	RABB1c	isoform	X2
AT5G39320.1	XP_007045911.1	88.912	99	0	897	NC_030851.1	39607734	39609176	LOC18610282	UDP-glucose	6-dehydrogenase	1
AT5G39320.1	XP_017973323.1	88.912	99	0	901	NC_030852.1	22696190	22697632	LOC18604792	UDP-glucose	6-dehydrogenase	1
AT5G39320.1	XP_017973322.1	88.912	99	0	901	NC_030852.1	22696190	22697632	LOC18604792	UDP-glucose	6-dehydrogenase	1
AT5G39320.1	XP_007037510.2	88.912	99	0	901	NC_030852.1	22696190	22697632	LOC18604792	UDP-glucose	6-dehydrogenase	1
AT5G14640.1	XP_007031505.2	88.862	99	0	767	NC_030853.1	717936	718058	LOC18600782	shaggy-related	protein	kinase	epsilon
AT5G14640.1	XP_017975707.1	88.862	99	0	767	NC_030853.1	717936	718058	LOC18600782	shaggy-related	protein	kinase	epsilon
AT3G18820.1	XP_017982781.1	88.835	99	6.51e-138	384	NC_030858.1	5759628	5759680	LOC18588593	ras-related	protein	Rab7
AT3G46440.1	XP_017984785.1	88.791	99	0	634	NC_030859.1	2273883	2273963	LOC18586130	UDP-glucuronic	acid	decarboxylase	5
AT3G46440.1	XP_007009383.1	88.791	99	0	634	NC_030859.1	2273883	2273963	LOC18586130	UDP-glucuronic	acid	decarboxylase	5
AT3G07590.1	XP_017969303.1	88.776	85	5.61e-59	177	NC_030850.1	13982759	13982852	LOC18612535	small	nuclear	ribonucleoprotein	Sm	D1	isoform	X1
AT3G47810.1	XP_007037279.1	88.77	98	2.91e-124	348	NC_030852.1	17658169	17658300	LOC18604635	vacuolar	protein	sorting-associated	protein	29
AT3G14940.1	XP_017985474.1	88.74	99	0	1743	NC_030850.1	8815867	8816034	LOC18612050	phosphoenolpyruvate	carboxylase	2
AT5G45550.1	XP_017984008.1	88.732	98	6.51e-144	400	NC_030858.1	4051241	4051266	LOC18588294	MOB	kinase	activator-like	1A
AT5G45550.1	XP_017984009.1	88.732	98	6.51e-144	400	NC_030858.1	4051241	4051266	LOC18588294	MOB	kinase	activator-like	1A
AT4G24440.1	XP_007018286.1	88.679	99	4.5e-68	199	NC_030857.1	3538833	3538961	LOC18591836	transcription	initiation	factor	IIA	subunit	2
AT4G24440.1	XP_007018287.1	88.679	99	4.5e-68	199	NC_030857.1	3538833	3538961	LOC18591836	transcription	initiation	factor	IIA	subunit	2
AT2G39770.1	XP_017977017.1	88.643	99	0	668	NC_030854.1	1458630	1458740	LOC18597695	mannose-1-phosphate	guanylyltransferase	1
AT2G39770.1	XP_007026923.2	88.643	99	0	668	NC_030854.1	1458630	1458740	LOC18597695	mannose-1-phosphate	guanylyltransferase	1
AT2G39770.1	XP_007026922.2	88.643	99	0	668	NC_030854.1	1458630	1458740	LOC18597695	mannose-1-phosphate	guanylyltransferase	1
AT1G53000.2	XP_007021426.2	88.612	89	0	531	NC_030856.1	4925826	4926080	LOC18593937	3-deoxy-manno-octulosonate	cytidylyltransferase%2C	mitochondrial	isoform	X2
AT1G53000.2	XP_007021425.2	88.612	89	0	531	NC_030856.1	4925826	4926080	LOC18593937	3-deoxy-manno-octulosonate	cytidylyltransferase%2C	mitochondrial	isoform	X1
AT1G53000.2	XP_007021424.2	88.612	89	0	531	NC_030856.1	4925826	4926080	LOC18593937	3-deoxy-manno-octulosonate	cytidylyltransferase%2C	mitochondrial	isoform	X1
AT5G35530.1	XP_007012400.2	88.546	91	2.23e-150	418	NC_030858.1	3075916	3075945	LOC18588135	40S	ribosomal	protein	S3-3
AT5G56150.1	XP_017983112.1	88.514	99	2.92e-100	284	NC_030858.1	38500232	38500301	LOC18591103	ubiquitin-conjugating	enzyme	E2-17	kDa
AT4G35800.1	XP_007046584.2	88.488	99	0	3021	NC_030850.1	522849	522932	LOC18610701	DNA-directed	RNA	polymerase	II	subunit	1
AT1G03190.1	XP_017981692.1	88.448	76	0	1079	NC_030850.1	29849668	29849793	LOC18613370	DNA	repair	helicase	XPD	isoform	X2
AT4G38970.1	XP_007042028.2	88.442	99	0	718	NC_030851.1	3663056	3663232	LOC18607690	fructose-bisphosphate	aldolase	1%2C	chloroplastic
AT1G74310.1	XP_007037544.1	88.432	98	0	1616	NC_030852.1	23274061	23275210	LOC18604817	chaperone	protein	ClpB1
AT4G29480.1	XP_007012907.1	88.43	98	1.42e-78	227	NC_030858.1	4845327	4845508	LOC18588439	uncharacterized	protein	LOC18588439
AT3G18820.1	XP_007024171.1	88.406	99	1.66e-135	378	NC_030855.1	17051452	17051504	LOC18595934	ras-related	protein	Rab7	isoform	X1
AT3G11250.1	XP_017984850.1	88.406	85	0	509	NC_030859.1	1195094	1195351	LOC18585915	60S	acidic	ribosomal	protein	P0
AT5G43940.2	XP_007050114.1	88.372	99	0	715	NC_030850.1	25914166	25914199	LOC18613034	alcohol	dehydrogenase	class-3
AT3G22880.1	XP_017975035.1	88.372	99	0	624	NC_030853.1	28285319	28285335	LOC18603066	meiotic	recombination	protein	DMC1	homolog
AT5G17920.1	XP_007030024.2	88.366	99	0	1432	NC_030854.1	34374630	34374979	LOC18599818	5-methyltetrahydropteroyltriglutamate--homocysteine	methyltransferase
AT5G17920.1	XP_007030023.2	88.366	99	0	1432	NC_030854.1	34374630	34374979	LOC18599818	5-methyltetrahydropteroyltriglutamate--homocysteine	methyltransferase
AT3G49910.1	XP_007029307.1	88.356	99	5.17e-95	270	NC_030854.1	30244823	30245263	LOC18599319	60S	ribosomal	protein	L26-1
AT2G27600.1	XP_017983482.1	88.33	99	0	797	NC_030858.1	34316345	34316828	LOC18590343	protein	SUPPRESSOR	OF	K(+)	TRANSPORT	GROWTH	DEFECT	1
AT2G27600.1	XP_007015856.1	88.33	99	0	797	NC_030858.1	34316345	34316828	LOC18590343	protein	SUPPRESSOR	OF	K(+)	TRANSPORT	GROWTH	DEFECT	1
AT1G30580.1	XP_007022926.1	88.325	99	0	734	NC_030855.1	448965	449051	LOC18595073	obg-like	ATPase	1
AT3G04120.1	XP_007037904.2	88.288	98	0	624	NC_030852.1	25581202	25581205	LOC18605057	glyceraldehyde-3-phosphate	dehydrogenase%2C	cytosolic
AT3G14080.1	XP_017979087.1	88.281	99	1.45e-80	233	NC_030855.1	20224406	20224466	LOC18596249	sm-like	protein	LSM1B
AT2G20420.1	XP_007050219.2	88.278	99	0	766	NC_030850.1	26803281	26803379	LOC18613097	succinyl-CoA	ligase	[ADP-forming]	subunit	beta%2C	mitochondrial
AT5G57020.1	XP_017982834.1	88.249	99	0	814	NC_030858.1	4444156	4445460	LOC18588361	glycylpeptide	N-tetradecanoyltransferase	1
AT5G57020.1	XP_007012773.2	88.249	99	0	814	NC_030858.1	4444156	4445460	LOC18588361	glycylpeptide	N-tetradecanoyltransferase	1
AT5G57020.1	XP_007012772.2	88.249	99	0	814	NC_030858.1	4444156	4445460	LOC18588361	glycylpeptide	N-tetradecanoyltransferase	1
AT3G47810.1	XP_017972854.1	88.235	98	4.19e-123	345	NC_030852.1	17647429	17647560	LOC18604633	vacuolar	protein	sorting-associated	protein	29
AT3G02190.1	XP_007011758.1	88.235	98	1.9e-28	95.1	NC_030858.1	992033	992035	LOC18587731	60S	ribosomal	protein	39
AT5G35590.1	XP_007012615.1	88.211	99	5.43e-169	466	NC_030858.1	3891617	3891692	LOC18588262	proteasome	subunit	alpha	type-6
AT1G15690.1	XP_007013600.2	88.166	99	0	1368	NC_030858.1	7596429	7596690	LOC18588850	pyrophosphate-energized	vacuolar	membrane	proton	pump
AT1G11860.3	XP_017978820.1	88.148	96	0	754	NC_030855.1	25419246	25419803	LOC18597179	aminomethyltransferase%2C	mitochondrial
AT1G11860.3	XP_007026120.1	88.148	96	0	754	NC_030855.1	25419246	25419803	LOC18597179	aminomethyltransferase%2C	mitochondrial
AT1G68010.2	XP_007041810.1	88.114	99	0	689	NC_030851.1	2933790	2933912	LOC18607536	glycerate	dehydrogenase
AT4G01480.1	XP_007051388.2	88.06	93	3.1e-135	378	NC_030850.1	33023835	33023970	LOC18613874	soluble	inorganic	pyrophosphatase	1
AT5G63680.1	XP_007043167.2	88.039	99	0	937	NC_030851.1	7968788	7969045	LOC18608419	pyruvate	kinase%2C	cytosolic	isozyme
AT5G63680.1	XP_007043166.2	88.039	99	0	937	NC_030851.1	7968788	7969045	LOC18608419	pyruvate	kinase%2C	cytosolic	isozyme
AT5G62540.1	XP_007046200.1	88	99	3.71e-100	284	NC_030851.1	40535842	40535966	LOC18610470	ubiquitin-conjugating	enzyme	E2	2
AT5G62540.1	XP_007046201.1	88	99	3.71e-100	284	NC_030851.1	40535842	40535966	LOC18610470	ubiquitin-conjugating	enzyme	E2	2
AT5G62540.1	XP_007037261.1	88	99	3.71e-100	284	NC_030852.1	17505322	17505446	LOC18604625	ubiquitin-conjugating	enzyme	E2	2
AT5G67380.1	XP_007047493.2	87.988	81	0	583	NC_030850.1	3453801	3454174	LOC18611270	casein	kinase	II	subunit	alpha
AT4G35260.1	XP_017971875.1	87.978	99	0	657	NC_030851.1	2313650	2314153	LOC18607405	isocitrate	dehydrogenase	[NAD]	regulatory	subunit	1%2C	mitochondrial
AT4G35260.1	XP_007041629.2	87.978	99	0	657	NC_030851.1	2313650	2314153	LOC18607405	isocitrate	dehydrogenase	[NAD]	regulatory	subunit	1%2C	mitochondrial
AT4G35260.1	XP_007041630.2	87.978	99	0	657	NC_030851.1	2313650	2314153	LOC18607405	isocitrate	dehydrogenase	[NAD]	regulatory	subunit	1%2C	mitochondrial
AT3G27690.2	XP_007049308.1	87.97	89	5.66e-179	494	NC_030850.1	13016750	13016895	LOC18612444	chlorophyll	a-b	binding	protein	151%2C	chloroplastic
AT4G38970.1	XP_007046747.2	87.97	99	0	711	NC_030850.1	1005220	1005390	LOC18610808	fructose-bisphosphate	aldolase	1%2C	chloroplastic
AT3G55320.1	XP_017984704.1	87.967	98	0	2175	NC_030859.1	2682905	2682967	LOC18586192	ABC	transporter	B	family	member	20	isoform	X2
AT5G17920.1	XP_007015561.2	87.958	99	0	1428	NC_030858.1	32453041	32453204	LOC18590143	5-methyltetrahydropteroyltriglutamate--homocysteine	methyltransferase
AT3G26650.1	XP_007032095.1	87.901	99	0	674	NC_030853.1	3598569	3598610	LOC18601182	glyceraldehyde-3-phosphate	dehydrogenase	A%2C	chloroplastic
AT5G20850.1	XP_017982171.1	87.896	99	0	616	NC_030858.1	3531365	3531475	LOC18588206	DNA	repair	protein	RAD51	homolog
AT2G40690.1	XP_017984107.1	87.895	90	0	678	NC_030859.1	21112345	21112665	LOC18587434	glycerol-3-phosphate	dehydrogenase	[NAD(+)]	2%2C	chloroplastic
AT5G15450.1	XP_017975506.1	87.882	84	0	1460	NC_030853.1	16525801	16525932	LOC18601610	chaperone	protein	ClpB3%2C	chloroplastic	isoform	X2
AT3G20060.1	XP_007015153.2	87.845	99	5.26e-116	326	NC_030858.1	30154470	30154579	LOC18589908	ubiquitin-conjugating	enzyme	E2	20
AT5G54640.1	XP_007025913.2	87.805	94	9.92e-75	218	NC_030855.1	24802218	24802406	LOC18597039	probable	histone	H2A.3
AT5G41370.1	XP_007040301.1	87.792	99	0	1377	NC_030852.1	34320838	34320847	LOC18606560	DNA	repair	helicase	XPB1
AT2G13360.1	XP_017982669.1	87.781	99	0	752	NC_030858.1	30590366	30590570	LOC18589941	serine--glyoxylate	aminotransferase
AT2G13360.1	XP_017982668.1	87.781	99	0	752	NC_030858.1	30590366	30590570	LOC18589941	serine--glyoxylate	aminotransferase
AT2G13360.1	XP_017982670.1	87.781	99	0	752	NC_030858.1	30590366	30590570	LOC18589941	serine--glyoxylate	aminotransferase
AT2G18170.1	XP_007046832.2	87.772	99	0	691	NC_030850.1	1262286	1262708	LOC18610861	mitogen-activated	protein	kinase	7
AT4G08900.1	XP_017980777.1	87.719	99	0	610	NC_030857.1	14689684	14689827	LOC18592854	arginase	1%2C	mitochondrial
AT5G60600.1	XP_007016724.2	87.703	99	0	1372	NC_030858.1	37321184	37321391	LOC18590867	4-hydroxy-3-methylbut-2-en-1-yl	diphosphate	synthase	(ferredoxin)%2C	chloroplastic
AT5G60600.1	XP_007016723.2	87.703	99	0	1372	NC_030858.1	37321184	37321391	LOC18590867	4-hydroxy-3-methylbut-2-en-1-yl	diphosphate	synthase	(ferredoxin)%2C	chloroplastic
AT3G49910.1	XP_007047521.1	87.671	99	2.8e-93	266	NC_030850.1	3540178	3540618	LOC18611285	60S	ribosomal	protein	L26-1
AT3G59920.1	XP_017985350.1	87.613	99	0	819	NW_017234845.1	1780	1866	LOC18597388	guanosine	nucleotide	diphosphate	dissociation	inhibitor	1
AT4G01850.1	XP_017976989.1	87.597	98	0	693	NC_030854.1	3447264	3448436	LOC18598034	S-adenosylmethionine	synthase	4
AT4G01850.1	XP_017976991.1	87.597	98	0	693	NC_030854.1	3447264	3448436	LOC18598034	S-adenosylmethionine	synthase	4
AT4G01850.1	XP_017976990.1	87.597	98	0	693	NC_030854.1	3447264	3448436	LOC18598034	S-adenosylmethionine	synthase	4
AT1G23490.1	XP_017969646.1	87.582	84	1.21e-99	285	NC_030850.1	3068318	3068465	LOC18611195	ADP-ribosylation	factor	1	isoform	X1
AT1G23490.1	XP_017969640.1	87.582	84	1.21e-99	285	NC_030850.1	3068318	3068465	LOC18611195	ADP-ribosylation	factor	1	isoform	X1
AT5G40810.1	XP_007031773.1	87.582	99	0	566	NC_030853.1	1782409	1782465	LOC18600946	cytochrome	c1-2%2C	heme	protein%2C	mitochondrial
AT2G21150.1	XP_007041925.1	87.574	99	0	535	NC_030851.1	3324305	3324475	LOC18607609	protein	XAP5	CIRCADIAN	TIMEKEEPER	isoform	X2
ATCG00130.1	YP_004021303.1	87.5	99	1.74e-116	328	NC_014676.2	13145	13288	atpF	ATP	synthase	CF0	subunit	I
AT4G08170.2	XP_007018385.2	87.5	88	0	540	NC_030857.1	3900986	3901182	LOC18591899	inositol-tetrakisphosphate	1-kinase	3	isoform	X1
AT2G26300.1	XP_007012447.2	87.5	99	0	704	NC_030858.1	3247232	3247318	LOC18588166	guanine	nucleotide-binding	protein	alpha-1	subunit
AT4G35260.1	XP_007046538.1	87.466	99	0	664	NC_030850.1	356965	357474	LOC18610664	isocitrate	dehydrogenase	[NAD]	regulatory	subunit	1%2C	mitochondrial
AT3G07110.2	XP_007049776.1	87.44	99	7.01e-137	381	NC_030850.1	16884008	16884279	LOC18612784	60S	ribosomal	protein	L13a-4
AT3G19590.1	XP_007042628.1	87.427	99	0	629	NC_030851.1	5808053	5808175	LOC18608077	mitotic	checkpoint	protein	BUB3.2
AT3G54300.1	XP_007010423.2	87.395	99	4.28e-146	407	NC_030859.1	14321613	14321802	LOC18586800	vesicle-associated	membrane	protein	727
AT3G54300.1	XP_017984957.1	87.395	99	4.28e-146	407	NC_030859.1	14321613	14321802	LOC18586800	vesicle-associated	membrane	protein	727
AT5G09590.1	XP_007042500.2	87.39	99	0	1202	NC_030851.1	6321043	6321117	LOC18607986	heat	shock	70	kDa	protein%2C	mitochondrial
AT5G37600.1	XP_007036933.2	87.36	99	0	664	NC_030852.1	7417351	7417424	LOC18604409	glutamine	synthetase	nodule	isozyme
AT5G22950.1	XP_007016862.1	87.336	99	4.61e-136	381	NC_030858.1	37878159	37878270	LOC18590957	vacuolar	protein	sorting-associated	protein	24	homolog	1
AT5G62540.1	XP_007030006.1	87.333	99	7.24e-100	283	NC_030854.1	34294053	34294177	LOC18599807	ubiquitin-conjugating	enzyme	E2	2
AT5G35360.3	XP_017983060.1	87.332	94	0	917	NC_030858.1	18580291	18580341	LOC18589496	biotin	carboxylase	1%2C	chloroplastic
AT3G23990.1	XP_017969755.1	87.321	97	0	991	NC_030850.1	18857249	18857286	LOC18612864	chaperonin	CPN60-2%2C	mitochondrial
AT3G47810.1	XP_007046175.1	87.302	99	8.22e-126	352	NC_030851.1	40455891	40456022	LOC18610454	vacuolar	protein	sorting-associated	protein	29
AT3G47810.1	XP_007046176.1	87.302	99	8.22e-126	352	NC_030851.1	40455891	40456022	LOC18610454	vacuolar	protein	sorting-associated	protein	29
AT4G01320.1	XP_017983972.1	87.264	99	0	762	NC_030850.1	34265677	34265707	LOC18614089	CAAX	prenyl	protease	1	homolog
AT1G04940.1	XP_017980786.1	87.264	77	9.59e-137	386	NC_030857.1	1433027	1433210	LOC18591444	protein	TIC	20-I%2C	chloroplastic
AT3G19760.1	XP_007043317.2	87.255	99	0	743	NC_030851.1	8629337	8629638	LOC18608514	eukaryotic	initiation	factor	4A-3
AT4G16450.1	XP_007026310.1	87.255	95	1.24e-62	185	NC_030855.1	25918120	25918273	LOC18597305	NADH-ubiquinone	oxidoreductase	20.9	kDa	subunit
AT1G29150.1	XP_007045996.2	87.229	99	0	738	NC_030851.1	39886921	39888189	LOC18610337	26S	proteasome	non-ATPase	regulatory	subunit	11	homolog
AT4G13940.1	XP_017974039.1	87.216	99	0	872	NC_030852.1	25290597	25291307	LOC18605016	adenosylhomocysteinase	1
AT1G03190.1	XP_007050637.2	87.203	99	0	1401	NC_030850.1	29849277	29849810	LOC18613370	DNA	repair	helicase	XPD	isoform	X1
AT5G18620.2	XP_017974958.1	87.187	99	0	1841	NC_030853.1	30341426	30341629	LOC18603449	ISWI	chromatin-remodeling	complex	ATPase	CHR11
AT2G45030.1	XP_007052213.1	87.186	99	0	1379	NC_030850.1	35923563	35923967	LOC18614400	elongation	factor	G-1%2C	mitochondrial
AT5G53460.1	XP_017972849.1	87.16	85	0	3464	NC_030852.1	29752789	29752809	LOC18605743	glutamate	synthase	1	[NADH]%2C	chloroplastic	isoform	X2
AT1G69670.1	XP_007046148.1	87.158	99	0	1348	NC_030851.1	40412972	40413132	LOC18610438	cullin-3A
AT2G34250.1	XP_017979219.1	87.135	99	0	894	NC_030855.1	22744611	22744954	LOC18596636	protein	transport	protein	Sec61	subunit	alpha	isoform	X1
AT3G57290.1	XP_017977740.1	87.126	98	0	808	NC_030854.1	37954738	37955100	LOC18600386	eukaryotic	translation	initiation	factor	3	subunit	E
AT1G23310.1	XP_017971644.1	87.11	99	0	890	NC_030851.1	32880938	32881054	LOC18609536	glutamate--glyoxylate	aminotransferase	2	isoform	X1
AT1G71790.1	XP_007020189.2	87.109	99	6.4e-159	441	NC_030857.1	18084773	18084901	LOC18593086	probable	F-actin-capping	protein	subunit	beta
AT1G16180.1	XP_007024820.2	87.089	95	0	684	NC_030855.1	20866218	20866401	LOC18596344	probable	serine	incorporator
AT1G16180.1	XP_017978619.1	87.089	95	0	684	NC_030855.1	20866218	20866401	LOC18596344	probable	serine	incorporator
AT3G48750.1	XP_007011506.1	87.075	99	0	540	NC_030858.1	169577	169585	LOC18587577	cell	division	control	protein	2	homolog	isoform	X2
AT4G02580.1	XP_007050428.2	87.059	99	5.97e-169	466	NC_030850.1	28824339	28824404	LOC18613239	NADH	dehydrogenase	[ubiquinone]	flavoprotein	2%2C	mitochondrial
AT3G58610.1	XP_007048671.2	87.037	99	0	1036	NC_030850.1	8697713	8698000	LOC18612034	ketol-acid	reductoisomerase%2C	chloroplastic
AT1G55490.1	XP_017983458.1	87.028	99	0	1053	NC_030858.1	22204122	22204358	LOC18589532	chaperonin	60	subunit	beta	2%2C	chloroplastic
AT5G42740.1	XP_007017511.2	87.027	99	0	998	NC_030857.1	1098859	1098909	LOC18591368	glucose-6-phosphate	isomerase%2C	cytosolic
AT5G42740.1	XP_017981148.1	87.027	99	0	998	NC_030857.1	1098859	1098909	LOC18591368	glucose-6-phosphate	isomerase%2C	cytosolic
AT4G18360.1	XP_007025050.2	87.017	98	0	646	NC_030855.1	21834229	21834365	LOC18596481	peroxisomal	(S)-2-hydroxy-acid	oxidase
AT4G18360.1	XP_007025049.2	87.017	98	0	646	NC_030855.1	21834229	21834365	LOC18596481	peroxisomal	(S)-2-hydroxy-acid	oxidase
AT4G18360.1	XP_007025051.2	87.017	98	0	646	NC_030855.1	21834229	21834365	LOC18596481	peroxisomal	(S)-2-hydroxy-acid	oxidase
AT2G21790.1	XP_007048190.2	87.01	99	0	1496	NC_030850.1	6396543	6396770	LOC18611720	ribonucleoside-diphosphate	reductase	large	subunit
AT4G34050.3	XP_017972002.1	86.992	86	1.99e-168	466	NC_030851.1	5183833	5183925	LOC18607959	caffeoyl-CoA	O-methyltransferase
AT3G59500.1	XP_007033919.1	86.989	99	1.08e-175	484	NC_030853.1	24594693	24594863	LOC18602466	protein	YIF1B
AT3G48750.1	XP_007011508.2	86.986	99	0	536	NC_030858.1	169577	169854	LOC18587577	cell	division	control	protein	2	homolog	A	isoform	X1
AT2G19520.1	XP_007012838.2	86.966	91	0	845	NC_030858.1	4618376	4618632	LOC18588395	WD-40	repeat-containing	protein	MSI4
AT4G36800.1	XP_007042730.1	86.957	99	5.84e-121	339	NC_030851.1	6163594	6163702	LOC18608142	NEDD8-conjugating	enzyme	Ubc12
AT4G36800.1	XP_007042731.1	86.957	99	5.84e-121	339	NC_030851.1	6163594	6163702	LOC18608142	NEDD8-conjugating	enzyme	Ubc12
AT4G36800.1	XP_017970007.1	86.957	99	5.84e-121	339	NC_030851.1	6163594	6163702	LOC18608142	NEDD8-conjugating	enzyme	Ubc12
AT5G64270.1	XP_007042904.2	86.95	99	0	2173	NC_030851.1	6844753	6848553	LOC18608254	splicing	factor	3B	subunit	1
AT3G17240.1	XP_017975064.1	86.863	99	0	880	NC_030853.1	31534381	31534659	LOC18603721	dihydrolipoyl	dehydrogenase	1%2C	mitochondrial
AT2G29630.1	XP_007016166.1	86.862	99	0	1196	NC_030858.1	35591844	35592154	LOC18590533	phosphomethylpyrimidine	synthase%2C	chloroplastic	isoform	X2
AT2G29630.1	XP_017982787.1	86.862	99	0	1196	NC_030858.1	35591844	35592154	LOC18590533	phosphomethylpyrimidine	synthase%2C	chloroplastic	isoform	X1
AT5G42270.1	XP_007017987.2	86.838	99	0	1199	NC_030857.1	2545299	2546582	LOC18591676	ATP-dependent	zinc	metalloprotease	FTSH%2C	chloroplastic
AT3G45300.1	XP_007015444.2	86.829	99	0	719	NC_030858.1	31983906	31984016	LOC18590081	isovaleryl-CoA	dehydrogenase%2C	mitochondrial	isoform	X1
AT2G32730.1	XP_007034386.2	86.819	99	0	1696	NC_030853.1	26451805	26451959	LOC18602740	26S	proteasome	non-ATPase	regulatory	subunit	1	homolog	A
AT1G43670.1	XP_007041599.2	86.804	99	0	621	NC_030851.1	2219708	2219866	LOC18607389	fructose-1%2C6-bisphosphatase%2C	cytosolic
AT2G38120.1	XP_007009048.1	86.788	90	0	813	NC_030859.1	1183519	1183689	LOC18585913	auxin	transporter-like	protein	2
AT2G38120.1	XP_007009047.1	86.788	90	0	813	NC_030859.1	1183519	1183689	LOC18585913	auxin	transporter-like	protein	2
AT5G65750.1	XP_017984861.1	86.765	99	0	1891	NC_030859.1	2368781	2370331	LOC18586143	2-oxoglutarate	dehydrogenase%2C	mitochondrial
AT5G65750.1	XP_007009420.2	86.765	99	0	1891	NC_030859.1	2368781	2370331	LOC18586143	2-oxoglutarate	dehydrogenase%2C	mitochondrial
AT2G44270.1	XP_017981372.1	86.74	98	0	644	NC_030857.1	2468764	2468862	LOC18591656	cytoplasmic	tRNA	2-thiolation	protein	1	isoform	X2
AT4G23460.1	XP_007040298.2	86.726	99	0	1575	NC_030852.1	34320067	34320153	LOC18606559	beta-adaptin-like	protein	B
AT5G11770.1	XP_017982695.1	86.697	99	1.14e-127	358	NC_030858.1	2627199	2627602	LOC18588043	NADH	dehydrogenase	[ubiquinone]	iron-sulfur	protein	7%2C	mitochondrial
AT5G26680.1	XP_007031291.1	86.63	79	0	663	NC_030854.1	39222400	39222411	LOC18600652	flap	endonuclease	1	isoform	X4
AT5G54640.1	XP_017979861.1	86.607	85	3.18e-66	197	NC_030850.1	30375889	30376083	LOC108660437	histone	H2AX-like
AT2G37190.1	XP_007027331.1	86.585	98	6.39e-104	295	NC_030854.1	2855981	2856481	LOC18597955	60S	ribosomal	protein	L12-3
AT5G14640.1	XP_007031229.2	86.585	99	0	748	NC_030854.1	39054588	39054695	LOC18600618	shaggy-related	protein	kinase	alpha
AT5G65430.3	XP_007018183.1	86.585	93	2.45e-157	437	NC_030857.1	3141515	3142012	LOC18591785	14-3-3-like	protein	B
AT2G37190.1	XP_017982120.1	86.585	98	1.75e-104	296	NC_030858.1	37360976	37361476	LOC18590877	60S	ribosomal	protein	L12-3
AT3G55440.1	XP_007016406.2	86.561	99	5.57e-149	416	NC_030858.1	36327062	36327100	LOC18590682	triosephosphate	isomerase%2C	cytosolic
AT5G09660.4	XP_007047657.1	86.532	80	0	517	NC_030850.1	4006268	4006561	LOC18611372	malate	dehydrogenase%2C	glyoxysomal	isoform	X1
AT5G37600.1	XP_017971285.1	86.517	99	0	660	NC_030851.1	8587056	8587129	LOC18608511	glutamine	synthetase	cytosolic	isozyme	1
AT2G36530.1	XP_007038456.1	86.517	99	0	794	NC_030852.1	27765915	27765980	LOC18605409	enolase
AT5G56150.1	XP_017971038.1	86.486	99	5.13e-97	276	NC_030851.1	2993323	2993392	LOC18607551	ubiquitin-conjugating	enzyme	E2	10
AT3G45300.1	XP_017982932.1	86.464	88	0	630	NC_030858.1	31983906	31984016	LOC18590081	isovaleryl-CoA	dehydrogenase%2C	mitochondrial	isoform	X2
AT3G04120.1	XP_007031744.2	86.446	98	0	598	NC_030853.1	1694357	1694384	LOC18600934	glyceraldehyde-3-phosphate	dehydrogenase	2%2C	cytosolic
AT3G59350.6	XP_007034045.2	86.441	83	0	622	NC_030853.1	25097554	25097647	LOC18602535	PTI1-like	tyrosine-protein	kinase	1
AT3G12780.1	XP_007022580.2	86.432	83	0	687	NC_030856.1	14805731	14805925	LOC18594857	phosphoglycerate	kinase%2C	cytosolic
AT3G12780.1	XP_007022579.2	86.432	83	0	687	NC_030856.1	14805731	14805925	LOC18594857	phosphoglycerate	kinase%2C	cytosolic
AT5G61410.1	XP_017973757.1	86.429	99	2.61e-179	494	NC_030852.1	22269184	22269293	LOC18604742	ribulose-phosphate	3-epimerase%2C	chloroplastic
AT5G26680.1	XP_007031293.2	86.427	80	0	663	NC_030854.1	39222400	39222411	LOC18600652	flap	endonuclease	1	isoform	X2
AT3G55320.1	XP_017984703.1	86.393	99	0	2455	NC_030859.1	2685007	2685411	LOC18586192	ABC	transporter	B	family	member	20	isoform	X1
AT1G66580.1	XP_007017106.1	86.364	99	3.82e-143	398	NC_030858.1	38529125	38529134	LOC18591109	60S	ribosomal	protein	10
AT5G59160.1	XP_007016295.1	86.364	98	0	562	NC_030858.1	35927862	35928054	LOC18590611	serine/threonine-protein	phosphatase	PP1	isozyme	2
AT3G44600.1	XP_017983711.1	86.355	81	0	964	NC_030858.1	34497118	34497363	LOC18590365	peptidyl-prolyl	cis-trans	isomerase	CYP71	isoform	X3
AT1G30620.1	XP_007022982.1	86.341	98	0	755	NC_030855.1	669748	669808	LOC18595107	UDP-arabinose	4-epimerase	1
AT1G30620.1	XP_007022981.1	86.341	98	0	755	NC_030855.1	669748	669808	LOC18595107	UDP-arabinose	4-epimerase	1
AT5G64610.1	XP_007018925.2	86.292	99	0	793	NC_030857.1	5843027	5843327	LOC18592248	histone	acetyltransferase	of	the	MYST	family	1	isoform	X2
AT5G55990.1	XP_017980184.1	86.283	99	7.12e-139	387	NC_030856.1	521231	521315	LOC18593231	calcineurin	B-like	protein	2	isoform	X2
AT1G62750.1	XP_017972843.1	86.277	99	0	1370	NC_030852.1	33051952	33052207	LOC18606324	elongation	factor	G-2%2C	chloroplastic
AT5G13710.1	XP_017969387.1	86.269	99	0	621	NC_030850.1	36890512	36890594	LOC18614599	cycloartenol-C-24-methyltransferase
AT5G40770.1	XP_007031746.1	86.232	99	2.73e-178	492	NC_030853.1	1701329	1701640	LOC18600935	prohibitin-3%2C	mitochondrial
AT5G13780.1	XP_017970728.1	86.224	99	4.25e-112	318	NC_030850.1	36815946	36816245	LOC18614584	N-alpha-acetyltransferase	daf-31
AT5G61500.1	XP_007052229.1	86.218	99	0	555	NC_030850.1	35970737	35970897	LOC18614410	autophagy-related	protein	3
AT4G35860.1	XP_007026420.1	86.19	99	3.01e-139	387	NC_030855.1	26207296	26207341	LOC18597368	ras-related	protein	RABB1c	isoform	X1
AT1G23490.1	XP_017969652.1	86.188	99	8.56e-120	336	NC_030850.1	3068318	3068465	LOC18611195	ADP-ribosylation	factor	1	isoform	X2
AT1G23490.1	XP_007047387.1	86.188	99	7.66e-120	336	NC_030850.1	3068318	3068465	LOC18611195	ADP-ribosylation	factor	1	isoform	X3
AT3G47340.1	XP_007016070.2	86.154	99	0	1075	NC_030858.1	35227387	35227466	LOC18590469	asparagine	synthetase	[glutamine-hydrolyzing]	1
AT5G26680.1	XP_017977571.1	86.15	79	0	658	NC_030854.1	39222400	39222411	LOC18600652	flap	endonuclease	1	isoform	X3
AT5G26680.1	XP_017977570.1	86.15	79	0	658	NC_030854.1	39222400	39222411	LOC18600652	flap	endonuclease	1	isoform	X3
AT2G41680.1	XP_007028668.1	86.13	84	0	812	NC_030854.1	26226226	26226373	LOC18598885	thioredoxin	reductase	NTRC	isoform	X2
AT5G64610.1	XP_007018926.2	86.099	99	0	789	NC_030857.1	5843027	5843327	LOC18592248	histone	acetyltransferase	of	the	MYST	family	1	isoform	X1
AT1G74910.1	XP_007036086.2	86.058	99	0	751	NC_030852.1	227407	227464	LOC18603824	mannose-1-phosphate	guanyltransferase	alpha
AT5G11500.1	XP_007012057.2	86.047	99	4.32e-132	370	NC_030858.1	2035378	2035490	LOC18587932	coiled-coil	domain-containing	protein	25	isoform	X2
AT1G56450.1	XP_017977172.1	86.026	93	9.84e-154	427	NC_030854.1	38893275	38893280	LOC18600579	proteasome	subunit	beta	type-4
AT5G50950.1	XP_007051015.2	86.022	91	0	817	NC_030850.1	31581294	31581448	LOC18613624	fumarate	hydratase	1%2C	mitochondrial
AT5G48300.1	XP_007049452.2	86.015	99	0	886	NC_030850.1	13988592	13988849	LOC18612536	glucose-1-phosphate	adenylyltransferase	small	subunit	2%2C	chloroplastic
AT4G34050.3	XP_007047308.1	86.008	85	1.72e-163	454	NC_030850.1	2834844	2834936	LOC18611157	caffeoyl-CoA	O-methyltransferase
AT2G34840.1	XP_007022979.2	86.007	99	0	529	NC_030855.1	659642	659815	LOC18595106	coatomer	subunit	epsilon-1
AT5G52920.1	XP_007038892.2	85.986	99	0	1023	NC_030852.1	29413503	29413739	LOC18605678	plastidial	pyruvate	kinase	2
AT1G09340.2	XP_007031209.2	85.96	91	0	639	NC_030854.1	39002777	39002878	LOC18600604	chloroplast	stem-loop	binding	protein	of	41	kDa	b%2C	chloroplastic	isoform	X2
AT1G17840.1	XP_007037082.2	85.957	99	0	1197	NC_030852.1	19525600	19525986	LOC18604500	ABC	transporter	G	family	member	11
AT5G26680.1	XP_017977569.1	85.95	80	0	658	NC_030854.1	39222400	39222411	LOC18600652	flap	endonuclease	1	isoform	X1
AT5G42020.3	XP_007030985.2	85.948	91	0	1096	NC_030854.1	38322065	38322113	LOC18600465	luminal-binding	protein	5	isoform	X2
AT5G54510.1	XP_007021139.2	85.948	99	0	1101	NC_030856.1	3350671	3350993	LOC18593723	indole-3-acetic	acid-amido	synthetase	GH3.6
AT5G03290.1	XP_007027355.1	85.946	98	0	655	NC_030854.1	2983854	2984033	LOC18597974	isocitrate	dehydrogenase	[NAD]	catalytic	subunit	5%2C	mitochondrial
AT3G58610.1	XP_017979305.1	85.943	93	0	987	NC_030855.1	23086015	23086326	LOC18596702	ketol-acid	reductoisomerase%2C	chloroplastic
AT1G77140.1	XP_017981740.1	85.94	99	0	1033	NC_030857.1	9735449	9735538	LOC18592542	vacuolar	protein	sorting-associated	protein	45	homolog
AT5G54750.2	XP_007028550.1	85.93	99	2.19e-125	351	NC_030854.1	24336822	24336878	LOC18598800	trafficking	protein	particle	complex	subunit	3
AT5G57360.2	XP_007014234.1	85.927	95	0	1051	NC_030858.1	13910407	13910630	LOC18589282	adagio	protein	1
AT5G26680.1	XP_017977573.1	85.912	79	0	657	NC_030854.1	39222400	39222411	LOC18600652	flap	endonuclease	1	isoform	X5
AT1G66580.1	XP_007011395.1	85.909	99	6e-142	395	NC_030859.1	21638268	21638277	LOC18587521	60S	ribosomal	protein	10
AT2G45770.1	XP_007051904.2	85.886	91	0	591	NC_030850.1	34853329	34853631	LOC18614202	cell	division	protein	FtsY	homolog%2C	chloroplastic	isoform	X4
AT2G45770.1	XP_017984769.1	85.886	91	0	590	NC_030850.1	34853329	34853631	LOC18614202	cell	division	protein	FtsY	homolog%2C	chloroplastic	isoform	X3
AT2G45770.1	XP_017984781.1	85.886	91	0	591	NC_030850.1	34853329	34853631	LOC18614202	cell	division	protein	FtsY	homolog%2C	chloroplastic	isoform	X4
AT2G45770.1	XP_017984758.1	85.886	91	0	591	NC_030850.1	34853329	34853631	LOC18614202	cell	division	protein	FtsY	homolog%2C	chloroplastic	isoform	X1
AT2G45770.1	XP_017984771.1	85.886	91	0	591	NC_030850.1	34853329	34853631	LOC18614202	cell	division	protein	FtsY	homolog%2C	chloroplastic	isoform	X4
AT5G15450.1	XP_007032676.2	85.882	96	0	1631	NC_030853.1	16526520	16526756	LOC18601610	chaperone	protein	ClpB3%2C	chloroplastic	isoform	X1
AT4G36800.1	XP_007047023.2	85.87	99	4.74e-121	339	NC_030850.1	1876337	1876445	LOC18610989	NEDD8-conjugating	enzyme	Ubc12
AT4G36800.1	XP_017978547.1	85.87	99	4.74e-121	339	NC_030850.1	1876337	1876445	LOC18610989	NEDD8-conjugating	enzyme	Ubc12
AT1G66340.1	XP_017980588.1	85.87	99	0	1293	NC_030856.1	9664431	9665336	LOC18594532	ethylene	receptor	isoform	X2
AT5G09660.4	XP_007041454.2	85.855	83	0	530	NC_030851.1	1803065	1803136	LOC18607305	malate	dehydrogenase%2C	glyoxysomal
AT5G14640.1	XP_007051227.1	85.854	99	0	752	NC_030850.1	32392341	32392454	LOC18613769	shaggy-related	protein	kinase	alpha
AT5G13650.2	XP_017977421.1	85.827	94	0	1113	NC_030854.1	27287245	27287455	LOC18598982	GTP-binding	protein	TypA/BipA	homolog	isoform	X1
AT1G62820.1	XP_007039977.1	85.811	99	4.48e-91	261	NC_030852.1	33211935	33212378	LOC18606356	probable	calcium-binding	protein	CML13
AT5G53160.2	XP_007038971.1	85.799	89	7.16e-108	306	NC_030852.1	29642783	29642923	LOC18605726	abscisic	acid	receptor	PYL8
AT5G13930.1	XP_007032052.2	85.788	98	0	704	NC_030853.1	3247227	3247410	LOC18601149	chalcone	synthase
AT5G19690.1	XP_017983035.1	85.787	99	0	1345	NC_030858.1	5396389	5396529	LOC18588531	dolichyl-diphosphooligosaccharide--protein	glycosyltransferase	subunit	STT3A
AT5G17310.2	XP_017975453.1	85.776	99	0	804	NC_030853.1	31831	31883	LOC18600669	UTP--glucose-1-phosphate	uridylyltransferase
AT5G17310.2	XP_007031320.2	85.776	99	0	804	NC_030853.1	31831	31883	LOC18600669	UTP--glucose-1-phosphate	uridylyltransferase
AT5G40580.1	XP_007031655.2	85.766	99	2.19e-178	492	NC_030853.1	1325702	1325845	LOC18600874	proteasome	subunit	beta	type-7-A
AT5G40580.1	XP_017975241.1	85.766	99	2.19e-178	492	NC_030853.1	1325702	1325845	LOC18600874	proteasome	subunit	beta	type-7-A
AT4G16155.1	XP_017975509.1	85.74	97	0	936	NC_030853.1	31098823	31099149	LOC18603617	dihydrolipoyl	dehydrogenase	2%2C	chloroplastic
AT4G02930.1	XP_017969915.1	85.683	99	0	754	NC_030850.1	30152018	30152208	LOC18613410	elongation	factor	Tu%2C	mitochondrial
AT4G08900.1	XP_007019836.1	85.673	99	0	600	NC_030857.1	14753136	14753279	LOC18592855	arginase	1%2C	mitochondrial
AT5G59890.1	XP_007016496.1	85.612	99	2.59e-90	258	NC_030858.1	36570583	36570585	LOC18590739	actin-depolymerizing	factor	2
AT5G47570.1	XP_017973738.1	85.6	99	3.87e-77	223	NC_030852.1	32813650	32813787	LOC18606290	NADH	dehydrogenase	[ubiquinone]	1	beta	subcomplex	subunit	8%2C	mitochondrial
AT1G27970.2	XP_007043966.1	85.593	87	1.72e-72	212	NC_030851.1	16201160	16201453	LOC18608971	nuclear	transport	factor	2
AT5G65110.1	XP_007047997.2	85.59	99	0	1211	NC_030850.1	5520779	5521221	LOC18611597	acyl-coenzyme	A	oxidase	2%2C	peroxisomal
AT4G16370.1	XP_007026362.2	85.559	99	0	1313	NC_030855.1	26055495	26055989	LOC18597336	oligopeptide	transporter	3
AT2G32080.1	XP_017983631.1	85.556	90	2.29e-169	471	NC_030858.1	22503106	22503486	LOC18589563	transcription	factor	Pur-alpha	1
AT2G39450.1	XP_007009545.1	85.533	99	0	686	NC_030859.1	2995781	2995946	LOC18586242	metal	tolerance	protein	11	isoform	X1
AT1G20950.1	XP_007018640.2	85.526	99	0	1102	NC_030857.1	4814499	4814588	LOC18592071	pyrophosphate--fructose	6-phosphate	1-phosphotransferase	subunit	alpha
AT4G33010.1	XP_007012280.2	85.524	99	0	1841	NC_030858.1	2730048	2731295	LOC18588058	glycine	dehydrogenase	(decarboxylating)%2C	mitochondrial
AT5G60790.1	XP_007016842.1	85.51	94	0	1023	NC_030858.1	37814393	37814620	LOC18590946	ABC	transporter	F	family	member	1
AT2G21150.1	XP_017970024.1	85.507	99	0	527	NC_030851.1	3324305	3324475	LOC18607609	protein	XAP5	CIRCADIAN	TIMEKEEPER	isoform	X1
AT1G77120.1	XP_017981819.1	85.488	99	0	691	NC_030857.1	9637163	9637196	LOC18592532	alcohol	dehydrogenase	class-P
AT3G54050.1	XP_007026831.1	85.484	89	0	664	NC_030854.1	1153717	1154145	LOC18597627	fructose-1%2C6-bisphosphatase%2C	chloroplastic
AT3G54890.1	XP_007009806.1	85.477	99	2.46e-151	421	NC_030859.1	3842327	3842520	LOC18586375	chlorophyll	a-b	binding	protein	6%2C	chloroplastic
AT1G77120.1	XP_007048344.2	85.45	99	0	691	NC_030850.1	7134136	7134172	LOC18611831	alcohol	dehydrogenase	1
AT5G48930.1	XP_007023476.1	85.45	99	0	776	NC_030855.1	4407081	4407488	LOC18595464	shikimate	O-hydroxycinnamoyltransferase
AT5G48930.1	XP_007023475.1	85.45	99	0	776	NC_030855.1	4407081	4407488	LOC18595464	shikimate	O-hydroxycinnamoyltransferase
AT1G73230.1	XP_007028432.1	85.43	91	1.05e-89	258	NC_030854.1	22694480	22694547	LOC18598718	nascent	polypeptide-associated	complex	subunit	beta
AT2G30050.1	XP_017979480.1	85.43	99	0	530	NC_030855.1	18010577	18011482	LOC18596002	protein	transport	protein	SEC13	homolog	B
AT1G01820.1	XP_007051927.2	85.408	99	3.25e-151	420	NC_030850.1	34949040	34949231	LOC18614218	peroxisomal	membrane	protein	11D
AT1G01820.1	XP_007051928.2	85.408	99	3.25e-151	420	NC_030850.1	34949040	34949231	LOC18614218	peroxisomal	membrane	protein	11D
AT4G30190.2	XP_017982447.1	85.403	93	0	1575	NC_030858.1	14163223	14163429	LOC18589272	plasma	membrane	ATPase	4	isoform	X2
AT1G60490.1	XP_017971708.1	85.399	99	0	1453	NC_030851.1	32305428	32305539	LOC18609484	phosphatidylinositol	3-kinase%2C	root	isoform
AT5G53460.1	XP_007039009.2	85.377	99	0	3960	NC_030852.1	29754654	29755049	LOC18605743	glutamate	synthase	1	[NADH]%2C	chloroplastic	isoform	X1
AT5G58270.1	XP_017983673.1	85.362	83	0	1082	NC_030858.1	38562669	38562936	LOC18591113	ABC	transporter	B	family	member	25%2C	mitochondrial	isoform	X2
AT4G18360.1	XP_007022183.2	85.359	98	0	633	NC_030856.1	9699070	9699206	LOC18594535	peroxisomal	(S)-2-hydroxy-acid	oxidase	GLO1	isoform	X1
AT4G18360.1	XP_007022182.2	85.359	98	0	633	NC_030856.1	9699070	9699206	LOC18594535	peroxisomal	(S)-2-hydroxy-acid	oxidase	GLO1	isoform	X1
AT3G54110.1	XP_007026812.2	85.333	97	0	508	NC_030854.1	1095981	1096064	LOC18597613	mitochondrial	uncoupling	protein	1
AT2G32730.1	XP_007034385.2	85.332	99	0	1654	NC_030853.1	26439766	26439920	LOC18602739	26S	proteasome	non-ATPase	regulatory	subunit	1	homolog	A
AT4G30190.2	XP_007014221.2	85.306	99	0	1683	NC_030858.1	14161481	14161537	LOC18589272	plasma	membrane	ATPase	4	isoform	X1
AT5G17330.1	XP_007045397.2	85.288	99	0	897	NC_030851.1	37336585	37336670	LOC18609957	glutamate	decarboxylase	4
AT2G30490.1	XP_007017089.1	85.288	99	0	865	NC_030858.1	38470262	38471046	LOC18591096	trans-cinnamate	4-monooxygenase
AT5G19760.1	XP_007014662.1	85.284	99	0	531	NC_030858.1	22695322	22695441	LOC18589569	mitochondrial	dicarboxylate/tricarboxylate	transporter	DTC
AT1G59900.1	XP_007044461.2	85.279	99	0	709	NC_030851.1	30289210	30289903	LOC18609342	pyruvate	dehydrogenase	E1	component	subunit	alpha-1%2C	mitochondrial
AT4G10340.1	XP_007019740.2	85.252	98	3.33e-171	474	NC_030857.1	8838812	8839034	LOC18592787	chlorophyll	a-b	binding	protein	CP26%2C	chloroplastic
AT5G49910.1	XP_007033712.2	85.216	99	0	1204	NC_030853.1	23690906	23691454	LOC108660436	heat	shock	70	kDa	protein	6%2C	chloroplastic
AT2G02810.1	XP_007046181.1	85.152	99	0	599	NC_030851.1	40473101	40473204	LOC18610457	UDP-galactose/UDP-glucose	transporter	3
AT2G20580.1	XP_017971421.1	85.118	99	0	1503	NC_030851.1	11443797	11443889	LOC18608766	26S	proteasome	non-ATPase	regulatory	subunit	2	homolog	A
AT5G15650.1	XP_007037627.2	85.112	99	0	640	NC_030852.1	23842238	23842564	LOC18604875	alpha-1%2C4-glucan-protein	synthase	[UDP-forming]	2
AT2G30490.1	XP_007011365.2	85.089	99	0	908	NC_030859.1	21542850	21543676	LOC18587499	trans-cinnamate	4-monooxygenase
AT1G12840.1	XP_007031994.1	85.067	99	0	662	NC_030853.1	2981350	2981463	LOC18601106	V-type	proton	ATPase	subunit	C
AT4G35310.1	XP_017971094.1	85.053	99	0	989	NC_030851.1	7684350	7685112	LOC18608372	calcium-dependent	protein	kinase	26
AT4G35310.1	XP_007043083.1	85.053	99	0	989	NC_030851.1	7684350	7685112	LOC18608372	calcium-dependent	protein	kinase	26
AT3G07110.2	XP_007034383.1	85.024	99	3.26e-134	374	NC_030853.1	26427999	26428270	LOC18602737	60S	ribosomal	protein	L13a-4
AT1G64520.1	XP_007029492.1	85.019	99	2.67e-161	448	NC_030854.1	31346807	31346911	LOC18599452	26S	proteasome	non-ATPase	regulatory	subunit	8	homolog	A
AT5G13930.1	XP_007034442.1	84.974	97	0	694	NC_030853.1	26718587	26718764	LOC18602780	chalcone	synthase	1
AT5G51820.1	XP_017972920.1	84.95	96	0	1015	NC_030852.1	28081681	28081932	LOC18605458	phosphoglucomutase%2C	chloroplastic
AT1G10520.1	XP_017971946.1	84.94	78	0	587	NC_030851.1	30810960	30811070	LOC18609378	DNA	polymerase	lambda	isoform	X4
AT4G15560.1	XP_017975597.1	84.937	99	0	1231	NC_030853.1	30060529	30060666	LOC18603409	probable	1-deoxy-D-xylulose-5-phosphate	synthase%2C	chloroplastic
AT5G66190.1	XP_017978306.1	84.89	99	0	622	NC_030850.1	769039	769272	LOC18610763	ferredoxin--NADP	reductase%2C	leaf	isozyme%2C	chloroplastic
AT1G54100.1	XP_017979260.1	84.843	99	0	896	NC_030855.1	20132260	20132394	LOC18596241	aldehyde	dehydrogenase	family	7	member	B4
AT5G59160.1	XP_007009182.1	84.839	99	0	562	NC_030859.1	1602377	1602593	LOC18586006	serine/threonine-protein	phosphatase	PP1	isozyme	4
AT2G19560.1	XP_017983505.1	84.831	86	0	631	NC_030858.1	4690540	4690559	LOC18588407	enhanced	ethylene	response	protein	5	isoform	X2
AT5G64370.1	XP_007042835.2	84.826	98	0	711	NC_030851.1	6564807	6564941	LOC18608204	beta-ureidopropionase
AT5G15650.1	XP_007045810.2	84.814	97	0	629	NC_030851.1	39296981	39297304	LOC18610218	alpha-1%2C4-glucan-protein	synthase	[UDP-forming]	2
AT2G13560.1	XP_007008738.2	84.814	98	0	1065	NC_030859.1	147752	147931	LOC18585720	NAD-dependent	malic	enzyme	62	kDa	isoform%2C	mitochondrial
AT5G02820.1	XP_017976926.1	84.813	99	0	738	NC_030854.1	2432092	2433348	LOC18597882	DNA	topoisomerase	6	subunit	A
AT4G18430.1	XP_007025496.1	84.793	99	2.71e-142	395	NC_030855.1	23392615	23392835	LOC18596761	ras-related	protein	RABA1f
AT4G35490.1	XP_007046480.1	84.768	96	4.01e-98	279	NC_030850.1	213103	213570	LOC18610635	54S	ribosomal	protein	L19%2C	mitochondrial
AT4G21980.2	XP_017972025.1	84.746	86	3.07e-72	212	NC_030851.1	38575746	38575782	LOC18610109	autophagy-related	protein	8A
AT4G35830.1	XP_007045642.2	84.744	99	0	1627	NC_030851.1	38492826	38493120	LOC18610098	aconitate	hydratase%2C	cytoplasmic
AT4G27450.1	XP_007021349.1	84.739	99	1.07e-161	447	NC_030856.1	4523619	4523830	LOC18593880	stem-specific	protein	TSJT1
AT1G66080.1	XP_017974916.1	84.737	99	1.16e-118	333	NC_030850.1	24971599	24972165	LOC18613000	protein	OPI10	homolog
AT5G14640.1	XP_007025342.2	84.726	84	0	635	NC_030855.1	22894376	22894390	LOC18596662	shaggy-related	protein	kinase	eta
AT5G54810.1	XP_007020962.2	84.719	94	0	772	NC_030856.1	2520763	2521095	LOC18593590	tryptophan	synthase	beta	chain	1
AT5G45620.1	XP_007040740.1	84.715	99	0	684	NC_030852.1	35683827	35683976	LOC18606838	26S	proteasome	non-ATPase	regulatory	subunit	13	homolog	B
AT4G31390.1	XP_007011574.2	84.699	94	0	1120	NC_030858.1	317553	317843	LOC18587614	uncharacterized	aarF	domain-containing	protein	kinase	At4g31390%2C	chloroplastic	isoform	X1
AT5G06140.1	XP_007027822.2	84.697	94	0	666	NC_030854.1	6394791	6394802	LOC18598289	sorting	nexin	1
AT5G54960.1	XP_017976842.1	84.679	99	0	1087	NC_030854.1	510751	511275	LOC18597501	pyruvate	decarboxylase	2
AT5G54640.1	XP_007030756.1	84.677	95	6.62e-69	203	NC_030854.1	37615820	37616020	LOC18600325	histone	H2AX
AT5G26240.1	XP_007034701.2	84.675	97	0	1268	NC_030853.1	27671189	27671368	LOC18602949	chloride	channel	protein	CLC-d	isoform	X2
AT4G02500.1	XP_017969397.1	84.665	99	0	802	NC_030850.1	31089170	31090561	LOC18613536	xyloglucan	6-xylosyltransferase	2
AT3G18130.1	XP_007036696.1	84.663	99	0	578	NC_030852.1	3877836	3878717	LOC18604259	guanine	nucleotide-binding	protein	subunit	beta-like	protein
AT1G77120.1	XP_007048342.2	84.656	99	0	681	NC_030850.1	7127805	7127844	LOC18611829	alcohol	dehydrogenase	1
AT4G24190.1	XP_007017829.2	84.646	92	0	1237	NC_030857.1	2054244	2054310	LOC18591572	endoplasmin	homolog
AT2G34590.1	XP_017979332.1	84.634	99	0	690	NC_030855.1	21863165	21863273	LOC18596485	pyruvate	dehydrogenase	E1	component	subunit	beta-3%2C	chloroplastic
AT3G52990.1	XP_007010157.1	84.63	99	0	952	NC_030859.1	6410410	6410478	LOC18586612	pyruvate	kinase	1%2C	cytosolic
AT1G71230.1	XP_007011590.2	84.615	98	0	620	NC_030858.1	343758	344138	LOC18587619	COP9	signalosome	complex	subunit	5b
AT1G75840.1	XP_007052386.2	84.571	89	1.06e-111	317	NC_030850.1	36575015	36575140	LOC18614531	rac-like	GTP-binding	protein	RAC2	isoform	X2
AT1G65980.1	XP_007013115.2	84.568	99	1.08e-99	283	NC_030858.1	5611841	5611995	LOC18588567	peroxiredoxin-2B
AT5G16910.1	XP_017977214.1	84.522	99	0	2032	NC_030854.1	32035025	32035893	LOC18599512	cellulose	synthase-like	protein	D3
AT4G35830.1	XP_017980150.1	84.497	80	0	1289	NC_030856.1	1887879	1888185	LOC18593495	aconitate	hydratase%2C	cytoplasmic
AT4G18360.1	XP_017980651.1	84.494	86	0	543	NC_030856.1	9699066	9699181	LOC18594535	peroxisomal	(S)-2-hydroxy-acid	oxidase	GLO1	isoform	X2
AT5G59160.1	XP_007030433.2	84.488	97	0	543	NC_030854.1	36143557	36143731	LOC18600080	serine/threonine-protein	phosphatase	PP1
AT3G11250.1	XP_007016138.2	84.477	85	3.53e-177	493	NC_030858.1	35505403	35505660	LOC18590520	60S	acidic	ribosomal	protein	P0-2
AT2G44350.2	XP_007052620.1	84.468	99	0	826	NC_030850.1	37276235	37276285	LOC18614684	citrate	synthase%2C	mitochondrial
AT3G49010.1	XP_007049063.2	84.466	99	3.48e-122	344	NC_030850.1	11169071	11169179	LOC18612281	60S	ribosomal	protein	L13-1
AT4G35250.1	XP_007041651.2	84.461	99	0	681	NC_030851.1	2397011	2397158	LOC18607421	uncharacterized	protein	ycf39
AT5G56150.1	XP_007046637.1	84.459	99	1.22e-95	272	NC_030850.1	656636	656705	LOC18610733	ubiquitin-conjugating	enzyme	E2	28
AT5G56150.1	XP_017984258.1	84.459	99	1.22e-95	272	NC_030850.1	656636	656705	LOC18610733	ubiquitin-conjugating	enzyme	E2	28
AT2G45200.2	XP_007052111.1	84.436	99	1.83e-157	437	NC_030850.1	35562607	35562739	LOC18614334	Golgi	SNAP	receptor	complex	member	2025-02-01	isoform	X1
AT5G26340.1	XP_007034709.1	84.398	99	0	913	NC_030853.1	27696319	27696454	LOC18602953	sugar	transport	protein	13
AT1G29990.1	XP_017978047.1	84.375	98	1.01e-73	215	NC_030855.1	22066245	22066326	LOC18596512	prefoldin	subunit	6
AT1G78570.1	XP_017969597.1	84.361	99	0	1193	NC_030850.1	9666035	9667609	LOC18612146	trifunctional	UDP-glucose	4%2C6-dehydratase/UDP-4-keto-6-deoxy-D-glucose	3%2C5-epimerase/UDP-4-keto-L-rhamnose-reductase	RHM1
AT3G03990.1	XP_007018509.2	84.351	98	9.84e-166	459	NC_030857.1	4371507	4371877	LOC18591986	strigolactone	esterase	D14
AT2G35370.1	XP_007039553.1	84.337	99	8.83e-100	284	NC_030852.1	31559450	31559558	LOC18606077	glycine	cleavage	system	H	protein%2C	mitochondrial
AT4G37640.1	XP_017981357.1	84.335	99	0	1768	NC_030850.1	3532144	3532317	LOC18611283	calcium-transporting	ATPase	2%2C	plasma	membrane-type
AT2G43130.1	XP_017975218.1	84.332	99	1.01e-135	379	NC_030853.1	24888459	24888792	LOC18602508	ras-related	protein	RABA5c
AT5G18650.1	XP_017975732.1	84.328	99	2.22e-174	481	NC_030853.1	30265918	30265976	LOC18603446	E3	ubiquitin-protein	ligase	MIEL1
AT4G29340.1	XP_007012985.1	84.328	99	3.17e-83	239	NC_030858.1	5101156	5101284	LOC18588487	profilin-4
AT3G25585.1	XP_007045647.1	84.319	99	0	692	NC_030851.1	38516318	38516454	LOC18610102	choline/ethanolaminephosphotransferase	1
AT3G25585.1	XP_017971777.1	84.319	99	0	692	NC_030851.1	38516318	38516454	LOC18610102	choline/ethanolaminephosphotransferase	1
AT5G57170.2	XP_007014427.1	84.314	87	1.2e-59	179	NC_030858.1	15918191	15918301	LOC18589402	macrophage	migration	inhibitory	factor	homolog
AT3G60820.1	XP_007052046.2	84.305	99	2.19e-145	404	NC_030850.1	35381710	35381756	LOC18614296	proteasome	subunit	beta	type-1
AT5G63890.2	XP_017985009.1	84.296	93	0	773	NC_030859.1	21430829	21430921	LOC18587479	histidinol	dehydrogenase%2C	chloroplastic	isoform	X3
AT5G63890.2	XP_017985010.1	84.296	93	0	773	NC_030859.1	21430829	21430921	LOC18587479	histidinol	dehydrogenase%2C	chloroplastic	isoform	X3
AT1G29880.1	XP_007043777.2	84.294	95	0	1238	NC_030851.1	12413348	12413866	LOC18608830	glycine--tRNA	ligase%2C	mitochondrial	1
AT4G10380.1	XP_007039259.1	84.266	94	8.61e-176	488	NC_030852.1	30615288	30615506	LOC18605900	probable	aquaporin	NIP5-1
AT1G75840.1	XP_017978060.1	84.264	99	2.18e-124	349	NC_030855.1	23379166	23379264	LOC18596759	rac-like	GTP-binding	protein	RAC13
AT5G50850.1	XP_007043862.2	84.254	99	0	638	NC_030851.1	13563932	13563955	LOC18608889	pyruvate	dehydrogenase	E1	component	subunit	beta-1%2C	mitochondrial
AT2G41530.1	XP_007028650.2	84.229	98	0	504	NC_030854.1	25831570	25831716	LOC18598871	S-formylglutathione	hydrolase
AT1G65930.1	XP_007022795.2	84.223	99	0	737	NC_030856.1	21257182	21257230	LOC18595004	isocitrate	dehydrogenase	[NADP]	isoform	X1
AT3G51130.1	XP_007046755.1	84.211	97	0	723	NC_030850.1	1017684	1017780	LOC18610812	UPF0183	protein	At3g51130	isoform	X1
AT5G58710.1	XP_007016102.2	84.211	93	1.36e-120	340	NC_030858.1	35383267	35383341	LOC18590495	peptidyl-prolyl	cis-trans	isomerase	CYP19-4
ATCG00740.1	YP_004021348.1	84.195	99	0	566	NC_014676.2	83034	84017	rpoA	RNA	polymerase	alpha	subunit
AT4G37870.1	XP_007047680.2	84.195	98	0	1128	NC_030850.1	4098128	4098372	LOC18611387	phosphoenolpyruvate	carboxykinase	[ATP]
AT1G50030.1	XP_017970870.1	84.194	99	0	4275	NC_030851.1	6082414	6082533	LOC18608126	serine/threonine-protein	kinase	TOR
AT5G40780.1	XP_017975643.1	84.187	99	0	747	NC_030853.1	1734647	1734694	LOC18600940	lysine	histidine	transporter	1
AT3G56940.1	XP_017977699.1	84.185	99	0	711	NC_030854.1	21968074	21968523	LOC18598690	magnesium-protoporphyrin	IX	monomethyl	ester	[oxidative]	cyclase%2C	chloroplastic
AT1G75840.1	XP_007036140.1	84.181	90	2.26e-114	324	NC_030852.1	401316	401420	LOC18603854	rac-like	GTP-binding	protein	ARAC8
AT2G21390.1	XP_017971428.1	84.18	99	0	2155	NC_030851.1	3828601	3828808	LOC18607713	coatomer	subunit	alpha-1
AT5G59890.1	XP_007027090.2	84.173	99	1.72e-87	251	NC_030854.1	2033316	2033318	LOC18597803	actin-depolymerizing	factor	2
AT5G01530.1	XP_007026729.1	84.173	96	2.84e-176	488	NC_030854.1	807223	807717	LOC18597555	chlorophyll	a-b	binding	protein	CP29.1%2C	chloroplastic
AT5G59890.1	XP_017985042.1	84.173	99	2.76e-86	248	NC_030859.1	2345009	2345011	LOC108663822	actin-depolymerizing	factor	2-like
AT1G03860.1	XP_007043712.1	84.138	99	1.05e-180	499	NC_030851.1	11809878	11810054	LOC18608786	prohibitin-1%2C	mitochondrial
AT4G31990.3	XP_007011759.2	84.127	94	0	782	NC_030858.1	994596	994667	LOC18587732	aspartate	aminotransferase%2C	chloroplastic
AT4G01470.1	XP_007009482.1	84.127	99	1.04e-153	427	NC_030859.1	2664166	2664298	LOC18586189	aquaporin	TIP1-3
AT2G30970.1	XP_007048727.1	84.112	99	0	762	NC_030850.1	9079980	9080153	LOC18612074	aspartate	aminotransferase%2C	mitochondrial	isoform	X1
AT3G44600.1	XP_017983709.1	84.102	99	0	1141	NC_030858.1	34499054	34499205	LOC18590365	peptidyl-prolyl	cis-trans	isomerase	CYP71	isoform	X1
AT3G44600.1	XP_017983710.1	84.102	99	0	1141	NC_030858.1	34499054	34499205	LOC18590365	peptidyl-prolyl	cis-trans	isomerase	CYP71	isoform	X1
AT1G80460.1	XP_007023294.2	84.1	99	0	899	NC_030855.1	2726156	2726289	LOC18595334	glycerol	kinase
AT2G21390.1	XP_007042068.2	84.098	99	0	2154	NC_030851.1	3822384	3822591	LOC18607712	coatomer	subunit	alpha-1
AT1G75840.1	XP_017969592.1	84.091	89	6.07e-110	313	NC_030850.1	36575015	36575140	LOC18614531	rac-like	GTP-binding	protein	RAC2	isoform	X1
AT3G60830.1	XP_017977825.1	84.066	99	0	638	NC_030850.1	36973378	36973455	LOC18614618	actin-related	protein	7
AT4G00585.1	XP_007051891.1	84.058	78	3.18e-40	127	NC_030850.1	34815990	34816166	LOC18614194	uncharacterized	protein	LOC18614194
AT1G29900.1	XP_017979981.1	84.052	98	0	2034	NC_030856.1	5918143	5919459	LOC18594090	carbamoyl-phosphate	synthase	large	chain%2C	chloroplastic
AT1G70710.1	XP_007045220.2	84.04	99	0	856	NC_030851.1	36086304	36086528	LOC18609839	endoglucanase	8
AT2G37330.1	XP_007027163.1	84.03	96	2.62e-167	463	NC_030854.1	2326431	2326664	LOC18597856	protein	ALUMINUM	SENSITIVE	3
AT5G59420.1	XP_007016387.2	84.026	99	0	832	NC_030858.1	36267658	36267755	LOC18590671	oxysterol-binding	protein-related	protein	3C
AT5G52840.1	XP_007038850.1	84.024	99	3.36e-101	288	NC_030852.1	29269545	29269857	LOC18605650	probable	NADH	dehydrogenase	[ubiquinone]	1	alpha	subcomplex	subunit	5%2C	mitochondrial
AT4G37560.1	XP_017979950.1	84	99	0	785	NC_030850.1	3444681	3444896	LOC18611267	formamidase
AT4G15802.1	XP_007050869.1	84	86	7.24e-43	134	NC_030850.1	31053220	31053222	LOC18613532	heat	shock	factor-binding	protein	1
AT1G61520.1	XP_007049480.2	84	99	3.7e-171	473	NC_030850.1	14153243	14153392	LOC18612555	photosystem	I	chlorophyll	a/b-binding	protein	3-1%2C	chloroplastic
ATCG00170.1	YP_004021307.1	83.986	99	0	2337	NC_014676.2	17237	21412	rpoC2	RNA	polymerase	beta'	subunit
AT1G07810.1	XP_007016574.2	83.977	99	0	1822	NC_030858.1	36824012	36825424	LOC18590783	calcium-transporting	ATPase	4%2C	endoplasmic	reticulum-type
AT5G64410.1	XP_017971204.1	83.934	99	0	1266	NC_030851.1	6342190	6342723	LOC18608168	oligopeptide	transporter	4	isoform	X2
AT3G18740.1	XP_007048061.1	83.929	99	6.89e-68	199	NC_030850.1	5769632	5769652	LOC18611638	60S	ribosomal	protein	30
AT5G64760.1	XP_007029338.2	83.908	98	0	768	NC_030854.1	30418211	30418213	LOC18599344	26S	proteasome	non-ATPase	regulatory	subunit	12	homolog	A
AT5G64760.1	XP_007029335.2	83.908	98	0	768	NC_030854.1	30418211	30418213	LOC18599344	26S	proteasome	non-ATPase	regulatory	subunit	12	homolog	A
AT3G22320.1	XP_007013104.1	83.902	99	3.15e-132	369	NC_030858.1	5553745	5553945	LOC18588559	DNA-directed	RNA	polymerases	II	and	IV	subunit	5A	isoform	X1
AT1G61150.1	XP_007025722.1	83.884	99	4.64e-147	410	NC_030855.1	24188833	24188886	LOC18596912	glucose-induced	degradation	protein	8	homolog	isoform	X1
AT3G09980.1	XP_007027643.1	83.871	87	2.95e-90	261	NC_030854.1	5037197	5037445	LOC18598178	probable	DNA	double-strand	break	repair	Rad50	ATPase
AT5G67380.1	XP_007047476.1	83.846	95	0	636	NC_030850.1	3376675	3376907	LOC18611255	casein	kinase	II	subunit	alpha
AT2G22420.1	XP_007047876.2	83.828	92	0	540	NC_030850.1	5022662	5022859	LOC18611523	peroxidase	17
AT4G31720.1	XP_007011643.1	83.824	99	2.72e-82	237	NC_030858.1	582198	582290	LOC18587658	transcription	initiation	factor	TFIID	subunit	10
AT2G22125.1	XP_017982341.1	83.817	99	0	3528	NC_030850.1	5707079	5707081	LOC18611629	uncharacterized	protein	LOC18611629
AT5G56280.1	XP_007020298.1	83.801	99	0	561	NC_030856.1	74141	74450	LOC18593178	COP9	signalosome	complex	subunit	6a
AT4G09320.1	XP_007052336.1	83.784	99	4.27e-93	266	NC_030850.1	36372221	36372271	LOC18614489	nucleoside	diphosphate	kinase	B
AT5G11520.1	XP_007013138.2	83.75	89	0	726	NC_030858.1	5690356	5690409	LOC18588579	aspartate	aminotransferase%2C	cytoplasmic
AT5G42890.1	XP_017980816.1	83.74	99	7.08e-74	215	NC_030857.1	365426	365551	LOC18591197	non-specific	lipid-transfer	protein-like	1
AT3G08590.1	XP_007033820.1	83.721	99	0	974	NC_030853.1	24170131	24170295	LOC18602404	2%2C3-bisphosphoglycerate-independent	phosphoglycerate	mutase
AT3G44600.1	XP_007015888.2	83.721	95	0	1092	NC_030858.1	34499054	34499205	LOC18590365	peptidyl-prolyl	cis-trans	isomerase	CYP71	isoform	X2
AT3G51130.1	XP_017969439.1	83.709	97	0	714	NC_030850.1	1017684	1017780	LOC18610812	UPF0183	protein	At3g51130	isoform	X2
AT1G64550.1	XP_007040602.1	83.679	99	0	1240	NC_030852.1	35296657	35296860	LOC18606754	ABC	transporter	F	family	member	3	isoform	X1
AT5G52520.1	XP_017972934.1	83.677	97	0	932	NC_030852.1	29104742	29105188	LOC18605615	proline--tRNA	ligase%2C	chloroplastic/mitochondrial
AT5G03760.1	XP_007027600.2	83.677	99	0	956	NC_030854.1	4495111	4495440	LOC18598147	glucomannan	4-beta-mannosyltransferase	9
AT2G46790.1	XP_017985432.1	83.673	81	1.63e-19	91.7	NC_030850.1	33094898	33095108	LOC18613889	two-component	response	regulator-like	APRR3	isoform	X2
AT2G46790.1	XP_017985431.1	83.673	81	1.66e-19	91.7	NC_030850.1	33094898	33095108	LOC18613889	two-component	response	regulator-like	APRR3	isoform	X1
AT2G46790.1	XP_017985433.1	83.673	81	1.77e-19	91.7	NC_030850.1	33094898	33095108	LOC18613889	two-component	response	regulator-like	APRR3	isoform	X3
AT5G13840.1	XP_017984835.1	83.669	99	0	783	NC_030859.1	1764372	1764875	LOC18586038	protein	FIZZY-RELATED	3
AT4G04770.1	XP_017979340.1	83.662	99	0	971	NC_030855.1	25220970	25222409	LOC18597136	UPF0051	protein	ABCI8%2C	chloroplastic
AT2G45200.2	XP_007052112.1	83.658	99	1.41e-154	429	NC_030850.1	35562607	35562739	LOC18614334	Golgi	SNAP	receptor	complex	member	2025-02-01	isoform	X2
AT5G12210.1	XP_007010502.2	83.654	97	0	557	NC_030859.1	15417049	15417102	LOC18586867	geranylgeranyl	transferase	type-2	subunit	beta	1
AT5G13490.1	XP_017969433.1	83.632	99	0	642	NC_030850.1	37069015	37069518	LOC18614634	ADP%2CATP	carrier	protein	1%2C	mitochondrial
AT5G08650.1	XP_017983951.1	83.614	96	0	1136	NC_030850.1	22062073	22062489	LOC18612935	translation	factor	GUF1	homolog%2C	chloroplastic	isoform	X1
AT4G04040.1	XP_007026197.2	83.607	96	0	968	NC_030855.1	25641318	25641510	LOC18597231	pyrophosphate--fructose	6-phosphate	1-phosphotransferase	subunit	beta
AT5G25450.1	XP_017983338.1	83.607	99	2.25e-61	183	NC_030858.1	8755410	8755503	LOC18588977	cytochrome	b-c1	complex	subunit	2025-02-07	isoform	X1
AT4G14880.1	XP_017974671.1	83.596	98	0	506	NC_030853.1	27945090	27945131	LOC18602993	cysteine	synthase
AT4G14880.1	XP_007034764.1	83.596	98	0	506	NC_030853.1	27945090	27945131	LOC18602993	cysteine	synthase
AT3G14080.1	XP_007012604.1	83.594	99	1.38e-77	225	NC_030858.1	3861158	3861218	LOC18588256	sm-like	protein	LSM1B
AT3G60750.1	XP_007052090.2	83.578	99	0	1286	NC_030850.1	35493987	35494481	LOC18614321	transketolase%2C	chloroplastic
AT3G57610.1	XP_007028837.2	83.57	99	0	827	NC_030854.1	27557253	27557546	LOC18599007	adenylosuccinate	synthetase	2%2C	chloroplastic
AT4G17260.1	XP_007039878.2	83.569	99	0	612	NC_030852.1	32793262	32793870	LOC18606285	L-lactate	dehydrogenase	B
AT1G67600.1	XP_017971823.1	83.562	89	9.95e-89	256	NC_030851.1	34538458	34538615	LOC108660979	uncharacterized	membrane	protein	YuiD-like
AT5G19820.1	XP_017983414.1	83.559	99	0	1923	NC_030858.1	23006291	23007502	LOC18589575	importin-5
AT1G76540.1	XP_017981484.1	83.553	97	0	546	NC_030857.1	4824003	4824241	LOC18592073	cell	division	control	protein	2	homolog	D
AT3G55360.1	XP_007009348.1	83.548	99	0	557	NC_030859.1	2093117	2093185	LOC18586099	very-long-chain	enoyl-CoA	reductase
ATCG00050.1	YP_004021299.1	83.544	99	3.04e-44	137	NC_014676.2	6409	6448	rps16	ribosomal	protein	S16
AT2G43710.1	XP_017975512.1	83.541	99	0	700	NC_030853.1	23759236	23759360	LOC18602344	stearoyl-[acyl-carrier-protein]	9-desaturase%2C	chloroplastic
AT3G52560.4	XP_007027916.1	83.537	99	2.68e-99	282	NC_030854.1	8044683	8044716	LOC18598359	ubiquitin-conjugating	enzyme	E2	variant	1D
AT2G06990.1	XP_007014535.2	83.535	99	0	1724	NC_030858.1	18289737	18290708	LOC18589487	DExH-box	ATP-dependent	RNA	helicase	DExH10	isoform	X1
AT2G06990.1	XP_017983132.1	83.535	99	0	1724	NC_030858.1	18289737	18290708	LOC18589487	DExH-box	ATP-dependent	RNA	helicase	DExH10	isoform	X1
AT2G06990.1	XP_017983131.1	83.535	99	0	1724	NC_030858.1	18289737	18290708	LOC18589487	DExH-box	ATP-dependent	RNA	helicase	DExH10	isoform	X1
AT3G46970.1	XP_007016192.2	83.532	99	0	1481	NC_030858.1	35673521	35673712	LOC18590550	alpha-glucan	phosphorylase%2C	H	isozyme
AT3G58750.1	XP_007048797.2	83.529	99	0	896	NC_030850.1	9459680	9459925	LOC18612123	citrate	synthase	3%2C	peroxisomal
AT1G10670.3	XP_007044704.1	83.521	99	0	769	NC_030851.1	32425147	32425245	LOC18609504	ATP-citrate	synthase	alpha	chain	protein	1
AT1G15880.1	XP_007023394.2	83.482	99	6.16e-137	383	NC_030855.1	3690623	3690661	LOC18595410	Golgi	SNAP	receptor	complex	member	2025-01-01
AT1G61150.1	XP_007025723.1	83.471	99	6.7e-144	402	NC_030855.1	24188833	24188886	LOC18596912	glucose-induced	degradation	protein	8	homolog	isoform	X2
AT5G54960.1	XP_007025437.2	83.452	92	0	997	NC_030855.1	23235943	23236419	LOC18596726	pyruvate	decarboxylase	1
AT1G01910.1	XP_007051959.2	83.429	99	0	575	NC_030850.1	35027157	35027417	LOC18614237	ATPase	GET3
AT5G15750.1	XP_007050887.1	83.425	99	2.32e-115	325	NC_030850.1	31125143	31125276	LOC18613542	U3	small	nucleolar	ribonucleoprotein	protein	IMP3
AT5G26240.1	XP_007034700.2	83.417	99	0	1285	NC_030853.1	27671189	27671368	LOC18602949	chloride	channel	protein	CLC-d	isoform	X1
AT4G35860.1	XP_007049450.2	83.412	99	8e-137	381	NC_030850.1	13975054	13975099	LOC18612534	ras-related	protein	RABB1c
AT4G17380.1	XP_017973428.1	83.397	99	0	1395	NC_030852.1	32537140	32537205	LOC18606235	DNA	mismatch	repair	protein	MSH4	isoform	X3
AT3G51840.1	XP_017977375.1	83.371	99	0	772	NC_030854.1	632285	632309	LOC18597524	acyl-coenzyme	A	oxidase	4%2C	peroxisomal
AT1G75990.1	XP_017981309.1	83.368	99	0	777	NC_030857.1	2228609	2228687	LOC18591605	probable	26S	proteasome	non-ATPase	regulatory	subunit	3
AT1G15690.1	XP_017977384.1	83.355	99	0	1269	NC_030854.1	38806410	38806641	LOC18600564	pyrophosphate-energized	vacuolar	membrane	proton	pump
AT5G64740.1	XP_017982127.1	83.348	99	0	1813	NC_030850.1	6445641	6445721	LOC18611727	cellulose	synthase	A	catalytic	subunit	2	[UDP-forming]
AT4G34460.1	XP_007042212.1	83.333	99	0	624	NC_030851.1	4304952	4305057	LOC18607793	guanine	nucleotide-binding	protein	subunit	beta-2
AT4G39220.1	XP_017970833.1	83.333	94	3.14e-111	315	NC_030851.1	4096708	4097057	LOC18607757	protein	RER1A
AT1G14000.1	XP_017970978.1	83.333	99	0	745	NC_030851.1	39903997	39904314	LOC18610341	serine/threonine-protein	kinase	STY46
AT4G17380.1	XP_007039794.2	83.333	99	0	1399	NC_030852.1	32537140	32537205	LOC18606235	DNA	mismatch	repair	protein	MSH4	isoform	X6
AT1G55090.1	XP_007040597.1	83.333	99	0	1307	NC_030852.1	35295892	35296085	LOC18606753	glutamine-dependent	NAD(+)	synthetase
AT2G35040.1	XP_007041042.2	83.305	97	0	996	NC_030851.1	306139	306406	LOC18607029	bifunctional	purine	biosynthesis	protein	PurH
AT5G35790.1	XP_007043909.1	83.299	85	0	882	NC_030851.1	15011185	15011389	LOC18608929	glucose-6-phosphate	1-dehydrogenase%2C	chloroplastic	isoform	X1
AT5G35790.1	XP_017971833.1	83.299	85	0	882	NC_030851.1	15011185	15011389	LOC18608929	glucose-6-phosphate	1-dehydrogenase%2C	chloroplastic	isoform	X2
AT2G19560.1	XP_007012854.2	83.293	99	0	689	NC_030858.1	4690540	4690722	LOC18588407	enhanced	ethylene	response	protein	5	isoform	X1
AT4G24820.1	XP_007037889.1	83.29	98	0	663	NC_030852.1	25487648	25487786	LOC18605045	26S	proteasome	non-ATPase	regulatory	subunit	6	homolog
AT5G13710.1	XP_017969388.1	83.284	99	0	606	NC_030850.1	36897290	36897372	LOC18614600	cycloartenol-C-24-methyltransferase
AT1G17870.1	XP_007042686.2	83.268	88	0	840	NC_030851.1	6014294	6014947	LOC18608118	probable	zinc	metallopeptidase	EGY3%2C	chloroplastic
AT2G45790.1	XP_007051874.1	83.265	99	1.3e-148	414	NC_030850.1	34777093	34777161	LOC18614181	phosphomannomutase
AT3G62270.1	XP_007051221.2	83.264	99	0	1198	NC_030850.1	32356130	32356233	LOC18613764	boron	transporter	1
AT5G19330.1	XP_007034686.1	83.262	99	0	1183	NC_030853.1	27619331	27619571	LOC18602941	ARM	REPEAT	PROTEIN	INTERACTING	WITH	ABF2	isoform	X2
AT1G65930.1	XP_017980049.1	83.252	99	0	722	NC_030856.1	21257182	21257230	LOC18595004	isocitrate	dehydrogenase	[NADP]	isoform	X2
AT3G22200.2	XP_017980506.1	83.251	79	0	712	NC_030850.1	10925148	10925181	LOC18612261	gamma	aminobutyrate	transaminase	3%2C	chloroplastic	isoform	X3
AT4G02570.1	XP_017975508.1	83.243	99	0	1306	NC_030853.1	30495574	30495713	LOC18603479	cullin-1
AT5G14640.1	XP_017982320.1	83.242	89	0	647	NC_030850.1	9070497	9070586	LOC18612073	shaggy-related	protein	kinase	zeta	isoform	X2
AT2G42810.2	XP_017969402.1	83.24	99	0	907	NC_030850.1	9516387	9516465	LOC18612130	serine/threonine-protein	phosphatase	5	isoform	X1
AT4G36410.1	XP_017969930.1	83.23	99	3.75e-97	277	NC_030850.1	1200508	1200538	LOC18610846	probable	ubiquitin-conjugating	enzyme	E2	16
AT2G31060.3	XP_007050009.2	83.21	99	0	1115	NC_030850.1	23179065	23179385	LOC18612952	GTP-binding	protein	TypA/BipA	homolog
AT2G04030.1	XP_007045726.2	83.207	99	0	1281	NC_030851.1	38934924	38935178	LOC18610157	heat	shock	protein	90-5%2C	chloroplastic
AT3G47470.1	XP_007037388.2	83.2	99	1.62e-154	429	NC_030852.1	21931249	21931454	LOC18604719	chlorophyll	a-b	binding	protein	4%2C	chloroplastic
AT3G09820.1	XP_007009874.2	83.186	98	0	608	NC_030859.1	4195959	4196041	LOC18586420	adenosine	kinase	2
AT1G04410.1	XP_007052210.1	83.183	99	0	558	NC_030850.1	35909276	35909318	LOC18614398	malate	dehydrogenase%2C	cytoplasmic	isoform	X1
AT2G21250.1	XP_017969968.1	83.172	99	0	533	NC_030851.1	3609638	3609770	LOC18607678	NADP-dependent	D-sorbitol-6-phosphate	dehydrogenase
AT5G59160.1	XP_017975834.1	83.168	97	0	525	NC_030853.1	29097528	29097702	LOC18603210	serine/threonine-protein	phosphatase	PP1	isozyme	2	isoform	X3
AT5G59160.1	XP_017975833.1	83.168	97	0	525	NC_030853.1	29097528	29097702	LOC18603210	serine/threonine-protein	phosphatase	PP1	isozyme	2	isoform	X2
AT5G59160.1	XP_017975832.1	83.168	97	0	525	NC_030853.1	29097528	29097702	LOC18603210	serine/threonine-protein	phosphatase	PP1	isozyme	2	isoform	X1
AT5G59160.1	XP_017975835.1	83.168	97	0	525	NC_030853.1	29097528	29097702	LOC18603210	serine/threonine-protein	phosphatase	PP1	isozyme	2	isoform	X1
AT4G30190.2	XP_007011592.2	83.163	99	0	1642	NC_030858.1	352960	353016	LOC18587621	plasma	membrane	ATPase	4
AT3G25530.1	XP_007049486.2	83.158	98	2.13e-176	488	NC_030850.1	14168240	14168344	LOC18612560	glyoxylate/succinic	semialdehyde	reductase	1	isoform	X2
AT4G37870.1	XP_007018343.2	83.158	98	0	1125	NC_030857.1	3740397	3740668	LOC18591873	phosphoenolpyruvate	carboxykinase	[ATP]
AT2G45240.1	XP_007052103.1	83.127	99	0	714	NC_030850.1	35529138	35529205	LOC18614328	methionine	aminopeptidase	1A
AT2G45240.1	XP_017980827.1	83.127	99	0	714	NC_030850.1	35529138	35529205	LOC18614328	methionine	aminopeptidase	1A
AT3G61600.1	XP_007051648.2	83.122	98	0	953	NC_030850.1	34012595	34012847	LOC18614038	BTB/POZ	domain-containing	protein	POB1
AT1G12360.1	XP_017972785.1	83.105	98	0	1139	NC_030852.1	33254568	33254640	LOC18606364	SNARE-interacting	protein	KEULE
AT5G16715.1	XP_017975495.1	83.092	91	0	1568	NC_030853.1	19511157	19511158	LOC18601866	valine--tRNA	ligase%2C	chloroplastic/mitochondrial	2	isoform	X3
AT1G64550.1	XP_017972690.1	83.088	99	0	1149	NC_030852.1	35296657	35296860	LOC18606754	ABC	transporter	F	family	member	3	isoform	X3
AT5G16715.1	XP_017975496.1	83.041	87	0	1486	NC_030853.1	19510181	19510258	LOC18601866	valine--tRNA	ligase%2C	chloroplastic/mitochondrial	2	isoform	X4
AT3G18740.1	XP_007016670.1	83.036	99	2.74e-68	200	NC_030858.1	37171691	37171711	LOC18590842	60S	ribosomal	protein	30
AT2G02560.1	XP_007023141.1	83.033	99	0	1989	NC_030855.1	1825373	1825408	LOC18595225	cullin-associated	NEDD8-dissociated	protein	1
AT5G11670.1	XP_017983062.1	83.019	99	0	1025	NC_030858.1	2394411	2394434	LOC18587999	NADP-dependent	malic	enzyme
AT5G49190.1	XP_007035651.2	83	99	0	1412	NC_030853.1	30808434	30808510	LOC18603545	sucrose	synthase	2	isoform	X1
AT5G02870.1	XP_007027218.1	83	98	0	650	NC_030854.1	2464223	2465335	LOC18597888	60S	ribosomal	protein	4
AT1G36160.1	XP_017981308.1	82.999	99	0	3873	NC_030857.1	5574334	5574711	LOC18592201	acetyl-CoA	carboxylase	1
AT1G36160.1	XP_017981307.1	82.999	99	0	3873	NC_030857.1	5574334	5574711	LOC18592201	acetyl-CoA	carboxylase	1
AT1G36160.1	XP_017981306.1	82.999	99	0	3873	NC_030857.1	5574334	5574711	LOC18592201	acetyl-CoA	carboxylase	1
AT4G08390.1	XP_007019111.2	82.993	78	0	523	NC_030857.1	6671874	6672125	LOC18592363	probable	L-ascorbate	peroxidase	6%2C	chloroplastic	isoform	X2
AT4G08390.1	XP_017981672.1	82.993	78	0	524	NC_030857.1	6671874	6672125	LOC18592363	probable	L-ascorbate	peroxidase	6%2C	chloroplastic	isoform	X1
AT1G65660.1	XP_007035116.1	82.991	99	0	858	NC_030853.1	29174033	29174048	LOC18603219	pre-mRNA-splicing	factor	SLU7
AT3G07230.1	XP_007049698.2	82.979	98	1.37e-21	77.8	NC_030850.1	16164407	16164477	LOC18612725	wound-induced	basic	protein
AT5G47010.1	XP_007039605.2	82.962	98	0	2113	NC_030852.1	31742843	31743358	LOC18606113	regulator	of	nonsense	transcripts	1	homolog
AT5G54080.1	XP_007021635.2	82.96	97	0	785	NC_030856.1	6076360	6076580	LOC18594112	homogentisate	1%2C2-dioxygenase
AT3G20780.1	XP_007014896.2	82.96	99	0	1175	NC_030858.1	27508867	27508948	LOC18589734	DNA	topoisomerase	6	subunit	B
AT2G27460.1	XP_007015799.2	82.953	99	0	1295	NC_030858.1	34035223	34035550	LOC18590307	protein	transport	protein	sec24	isoform	X2
AT2G22370.1	XP_007047903.1	82.949	99	3.43e-131	368	NC_030850.1	5105919	5105954	LOC18611538	mediator	of	RNA	polymerase	II	transcription	subunit	18
AT3G27300.4	XP_017975477.1	82.946	88	0	891	NC_030853.1	1676713	1676883	LOC18600930	glucose-6-phosphate	1-dehydrogenase%2C	cytoplasmic	isoform
AT4G04770.1	XP_007024120.2	82.944	99	0	962	NC_030855.1	16755111	16756550	LOC18595902	UPF0051	protein	ABCI8%2C	chloroplastic
AT5G53530.1	XP_017983963.1	82.943	99	0	524	NC_030858.1	31670401	31670403	LOC18590050	vacuolar	protein	sorting-associated	protein	26A
AT1G10240.1	XP_017982907.1	82.941	99	0	1216	NC_030858.1	32386270	32387250	LOC18590134	protein	FAR1-RELATED	SEQUENCE	11
AT5G26780.2	XP_017981775.1	82.927	99	0	916	NC_030857.1	3633680	3633769	LOC18591852	serine	hydroxymethyltransferase	2%2C	mitochondrial
AT5G26780.2	XP_017981774.1	82.927	99	0	916	NC_030857.1	3633680	3633769	LOC18591852	serine	hydroxymethyltransferase	2%2C	mitochondrial
AT2G46280.1	XP_007016709.2	82.927	99	0	573	NC_030858.1	37289203	37289386	LOC18590860	eukaryotic	translation	initiation	factor	3	subunit	I
AT5G08650.1	XP_017983956.1	82.923	89	0	1056	NC_030850.1	22062073	22062489	LOC18612935	translation	factor	GUF1	homolog%2C	chloroplastic	isoform	X2
AT3G09820.1	XP_007027361.1	82.891	98	0	604	NC_030854.1	3010099	3010181	LOC18597977	adenosine	kinase	2
AT5G57410.3	XP_017982458.1	82.888	95	0	623	NC_030858.1	13477446	13477478	LOC18589300	afadin-	and	alpha-actinin-binding	protein	isoform	X1
AT2G06990.1	XP_017983133.1	82.878	84	0	1451	NC_030858.1	18289737	18290708	LOC18589487	DExH-box	ATP-dependent	RNA	helicase	DExH10	isoform	X2
AT5G49190.1	XP_017974329.1	82.875	99	0	1404	NC_030853.1	30808434	30808510	LOC18603545	sucrose	synthase	2	isoform	X2
AT1G30110.1	XP_007045145.2	82.857	99	2.44e-106	301	NC_030851.1	35274492	35274557	LOC18609779	nudix	hydrolase	25
AT5G37780.3	XP_017982974.1	82.857	99	3.04e-98	280	NC_030858.1	32463185	32463260	LOC18590144	calmodulin-7
AT5G13160.1	XP_007043875.2	82.826	98	0	762	NC_030851.1	13936701	13936821	LOC18608901	serine/threonine-protein	kinase	PBS1
AT3G25530.1	XP_017982492.1	82.824	90	1.48e-160	448	NC_030850.1	14168240	14168344	LOC18612560	glyoxylate/succinic	semialdehyde	reductase	1	isoform	X1
AT2G46540.1	XP_007051519.2	82.812	97	2.22e-33	108	NC_030850.1	33556194	33556272	LOC18613958	uncharacterized	protein	LOC18613958
AT1G73230.1	XP_007028419.1	82.803	95	7.9e-90	259	NC_030854.1	22415636	22415703	LOC18598710	basic	transcription	factor	3
AT1G64550.1	XP_017972689.1	82.794	99	0	1144	NC_030852.1	35296657	35296860	LOC18606754	ABC	transporter	F	family	member	3	isoform	X2
AT4G17380.1	XP_017973429.1	82.789	99	0	1393	NC_030852.1	32537140	32537205	LOC18606235	DNA	mismatch	repair	protein	MSH4	isoform	X4
AT5G05920.1	XP_007008768.2	82.787	99	0	657	NC_030859.1	213425	213619	LOC18585734	deoxyhypusine	synthase
AT2G30050.1	XP_007032314.2	82.781	99	0	522	NC_030853.1	9302890	9303795	LOC18601336	protein	transport	protein	SEC13	homolog	B
AT1G09570.3	XP_007031301.2	82.774	98	0	1914	NC_030854.1	39258968	39261014	LOC18600656	phytochrome	A
AT1G09570.3	XP_017977103.1	82.774	98	0	1914	NC_030854.1	39258968	39261014	LOC18600656	phytochrome	A
AT4G17380.1	XP_017973426.1	82.767	99	0	1389	NC_030852.1	32537140	32537205	LOC18606235	DNA	mismatch	repair	protein	MSH4	isoform	X1
AT3G12360.1	XP_007009581.2	82.765	98	0	937	NC_030859.1	3129362	3129386	LOC18586265	ankyrin	repeat-containing	protein	At3g12360
AT4G34700.1	XP_017970756.1	82.759	98	1.09e-70	206	NC_030851.1	3642420	3642551	LOC18607687	NADH	dehydrogenase	[ubiquinone]	1	beta	subcomplex	subunit	9	isoform	X2
AT3G12670.1	XP_007022789.2	82.753	99	0	1039	NC_030856.1	21149553	21149670	LOC18595000	CTP	synthase
AT3G29090.1	XP_007032611.1	82.748	98	0	558	NC_030853.1	16187951	16188193	LOC18601567	pectinesterase	31
AT3G52300.1	XP_007009739.1	82.738	99	6.66e-104	295	NC_030859.1	3626597	3626767	LOC18586346	ATP	synthase	subunit	d%2C	mitochondrial
AT5G18170.1	XP_007038224.2	82.725	99	0	723	NC_030852.1	26822827	26822934	LOC18605252	glutamate	dehydrogenase	2
AT5G57410.3	XP_017982459.1	82.713	95	0	626	NC_030858.1	13477446	13477478	LOC18589300	afadin-	and	alpha-actinin-binding	protein	isoform	X2
AT4G17380.1	XP_017973430.1	82.707	99	0	1393	NC_030852.1	32537140	32537205	LOC18606235	DNA	mismatch	repair	protein	MSH4	isoform	X5
AT5G14640.1	XP_007048725.1	82.703	90	0	654	NC_030850.1	9068866	9068967	LOC18612073	shaggy-related	protein	kinase	eta	isoform	X1
AT3G63140.1	XP_007050620.2	82.659	85	0	598	NC_030850.1	29771043	29771420	LOC18613359	chloroplast	stem-loop	binding	protein	of	41	kDa	a%2C	chloroplastic	isoform	X1
AT1G66380.1	XP_007033038.1	82.609	82	1.63e-67	205	NC_030853.1	19830550	19830685	LOC18601886	transcription	factor	MYB75	isoform	X1
AT5G61240.2	XP_007037490.1	82.596	99	0	557	NC_030852.1	22634611	22634695	LOC18604782	probable	leucine-rich	repeat	receptor-like	protein	kinase	At1g35710
AT5G47450.1	XP_007039804.2	82.591	98	2.57e-137	386	NC_030852.1	32569612	32569738	LOC18606242	probable	aquaporin	TIP-type
AT1G04410.1	XP_017975591.1	82.583	99	0	553	NC_030850.1	35908786	35908930	LOC18614398	malate	dehydrogenase%2C	cytoplasmic	isoform	X2
AT4G37040.1	XP_017969711.1	82.581	88	0	527	NC_030850.1	2529490	2529542	LOC18611107	methionine	aminopeptidase	1D%2C	chloroplastic/mitochondrial	isoform	X4
AT5G56760.1	XP_007012888.2	82.581	99	5.22e-175	486	NC_030858.1	4786029	4786421	LOC18588427	serine	acetyltransferase	5
AT1G68370.1	XP_017971636.1	82.567	99	0	702	NC_030851.1	25458332	25458459	LOC18609198	chaperone	protein	dnaJ	15
AT1G68370.1	XP_007044277.1	82.567	99	0	702	NC_030851.1	25458332	25458459	LOC18609198	chaperone	protein	dnaJ	15
AT4G17270.1	XP_017978555.1	82.544	98	0	572	NC_030855.1	25843143	25843262	LOC18597287	putative	MO25-like	protein	At5g47540
AT2G39730.1	XP_007009267.1	82.54	92	0	761	NC_030859.1	1881236	1881280	LOC18586059	ribulose	bisphosphate	carboxylase/oxygenase	activase	2%2C	chloroplastic	isoform	X2
AT1G48850.1	XP_017985077.1	82.517	98	0	747	NC_030859.1	3899583	3899715	LOC18586384	chorismate	synthase%2C	chloroplastic	isoform	X1
AT3G48170.1	XP_017973121.1	82.505	99	0	853	NC_030852.1	213840	213948	LOC18603822	betaine	aldehyde	dehydrogenase	1%2C	chloroplastic
AT5G63570.1	XP_007038068.1	82.489	99	0	815	NC_030852.1	26204782	26204961	LOC18605158	glutamate-1-semialdehyde	2%2C1-aminomutase	2%2C	chloroplastic
AT4G37040.1	XP_017969710.1	82.474	83	2.68e-179	499	NC_030850.1	2529157	2529218	LOC18611107	methionine	aminopeptidase	1D%2C	chloroplastic/mitochondrial	isoform	X3
AT2G18040.1	XP_017981503.1	82.456	95	1.54e-68	201	NC_030850.1	921696	921939	LOC18610791	peptidyl-prolyl	cis-trans	isomerase	Pin1
AT2G43640.1	XP_007033787.2	82.456	93	2.82e-56	171	NC_030853.1	24000136	24000138	LOC18602378	signal	recognition	particle	14	kDa	protein
AT5G64410.1	XP_017971203.1	82.442	99	0	1260	NC_030851.1	6343446	6343985	LOC18608168	oligopeptide	transporter	4	isoform	X1
AT5G56030.2	XP_007038813.2	82.442	99	0	1135	NC_030852.1	29196399	29196536	LOC18605634	heat	shock	protein	83
AT3G51240.1	XP_007046698.1	82.418	99	0	642	NC_030850.1	827281	827640	LOC18610772	naringenin%2C2-oxoglutarate	3-dioxygenase
AT2G42310.1	XP_017976622.1	82.418	79	1.87e-54	165	NC_030854.1	28083267	28083578	LOC108662054	uncharacterized	protein	LOC108662054
AT5G46290.3	XP_007025113.2	82.413	99	0	829	NC_030855.1	22134682	22135371	LOC18596525	3-oxoacyl-[acyl-carrier-protein]	synthase	I%2C	chloroplastic
AT5G09590.1	XP_007047700.1	82.405	99	0	1138	NC_030850.1	4193953	4194027	LOC18611402	heat	shock	70	kDa	protein%2C	mitochondrial
AT3G58680.1	XP_007021790.1	82.394	99	3.7e-79	230	NC_030856.1	7110665	7110806	LOC18594235	multiprotein-bridging	factor	1b
AT4G17380.1	XP_017973427.1	82.39	99	0	1377	NC_030852.1	32537140	32537205	LOC18606235	DNA	mismatch	repair	protein	MSH4	isoform	X2
AT1G11430.1	XP_007021140.2	82.386	76	1.64e-107	309	NC_030856.1	3362641	3362981	LOC18593724	multiple	organellar	RNA	editing	factor	9%2C	chloroplastic
AT5G57480.1	XP_017982455.1	82.365	96	0	837	NC_030858.1	12751477	12753009	LOC18589316	AAA-ATPase	At5g57480
AT1G35580.1	XP_017981049.1	82.364	99	0	965	NC_030857.1	16825695	16826081	LOC18592971	probable	alkaline/neutral	invertase	D	isoform	X1
AT1G35580.1	XP_017981047.1	82.364	99	0	965	NC_030857.1	16825695	16826081	LOC18592971	probable	alkaline/neutral	invertase	D	isoform	X1
AT4G36480.1	XP_017979239.1	82.353	81	0	675	NC_030855.1	6870898	6870926	LOC18595588	long	chain	base	biosynthesis	protein	1	isoform	X2
AT1G79600.1	XP_017984673.1	82.343	87	0	1038	NC_030859.1	21789580	21789654	LOC18587550	uncharacterized	aarF	domain-containing	protein	kinase	At1g79600%2C	chloroplastic	isoform	X2
AT5G05690.1	XP_007009007.2	82.34	99	0	788	NC_030859.1	974643	975164	LOC18585886	cytochrome	P450	90A1
AT5G60660.1	XP_007027328.1	82.332	97	7.13e-171	474	NC_030854.1	2846869	2847163	LOC18597952	aquaporin	PIP2-2
AT4G32880.1	XP_007012154.2	82.332	99	0	1436	NC_030858.1	2325845	2326062	LOC18587987	homeobox-leucine	zipper	protein	ATHB-8
AT4G32880.1	XP_017983822.1	82.332	99	0	1436	NC_030858.1	2325845	2326062	LOC18587987	homeobox-leucine	zipper	protein	ATHB-8
AT3G63520.1	XP_007052518.1	82.331	98	0	936	NC_030850.1	36990193	36990435	LOC18614622	carotenoid	9%2C10(9'%2C10')-cleavage	dioxygenase	1
AT5G66880.1	XP_007047159.2	82.32	99	0	625	NC_030850.1	2319643	2319819	LOC18611074	serine/threonine-protein	kinase	SRK2I
AT4G22880.1	XP_007040068.2	82.319	97	0	596	NC_030852.1	33520833	33521335	LOC18606417	leucoanthocyanidin	dioxygenase
AT5G04140.2	XP_017976632.1	82.314	99	0	2846	NC_030854.1	23364761	23365042	LOC18598741	ferredoxin-dependent	glutamate	synthase%2C	chloroplastic
AT5G49720.1	XP_017978831.1	82.314	97	0	1003	NC_030855.1	12275799	12276177	LOC108662600	endoglucanase	25
AT4G31790.1	XP_007015225.2	82.31	99	3.77e-173	479	NC_030858.1	30736736	30736885	LOC18589955	probable	diphthine	methyl	ester	synthase
AT4G31790.1	XP_017983969.1	82.31	99	3.77e-173	479	NC_030858.1	30736736	30736885	LOC18589955	probable	diphthine	methyl	ester	synthase
AT1G53580.1	XP_007022108.2	82.308	88	4.86e-160	447	NC_030856.1	9090830	9091063	LOC18594477	persulfide	dioxygenase	ETHE1	homolog%2C	mitochondrial
AT5G63960.2	XP_007020934.2	82.306	99	0	1912	NC_030856.1	2490364	2490649	LOC18593583	DNA	polymerase	delta	catalytic	subunit
AT5G14780.1	XP_007031449.1	82.292	99	0	670	NC_030853.1	533910	533993	LOC18600748	formate	dehydrogenase%2C	mitochondrial
AT4G13430.1	XP_017975166.1	82.289	91	0	823	NC_030853.1	29705877	29705927	LOC18603322	3-isopropylmalate	dehydratase	large	subunit	isoform	X2
AT5G65700.1	XP_017983525.1	82.287	98	0	1613	NC_030850.1	4018653	4021242	LOC18611374	leucine-rich	repeat	receptor-like	serine/threonine-protein	kinase	BAM1
AT3G55440.1	XP_017985155.1	82.283	99	6.33e-157	436	NC_030859.1	2020404	2020442	LOC18586084	triosephosphate	isomerase%2C	cytosolic
AT5G43970.1	XP_007050174.1	82.278	79	6.46e-41	130	NC_030850.1	26519596	26519913	LOC18613070	mitochondrial	import	receptor	subunit	TOM9-2
AT5G54190.1	XP_007021342.1	82.222	99	0	655	NC_030856.1	4502307	4502360	LOC18593874	protochlorophyllide	reductase%2C	chloroplastic
AT4G17380.1	XP_017973432.1	82.219	88	0	1224	NC_030852.1	32536207	32536236	LOC18606235	DNA	mismatch	repair	protein	MSH4	isoform	X8
AT5G53940.1	XP_007021557.1	82.171	99	1.6e-80	232	NC_030856.1	5707156	5707251	LOC18594048	protein	yippee-like	At5g53940
AT5G46110.4	XP_007025539.2	82.169	98	0	668	NC_030855.1	23510847	23511109	LOC18596786	triose	phosphate/phosphate	translocator	TPT%2C	chloroplastic	isoform	X1
AT1G26630.1	XP_007037448.1	82.166	98	3.31e-95	272	NC_030852.1	22432507	22432629	LOC18604761	eukaryotic	translation	initiation	factor	5A
AT3G27740.1	XP_007048248.2	82.161	92	0	697	NC_030850.1	6635463	6635586	LOC18611761	carbamoyl-phosphate	synthase	small	chain%2C	chloroplastic
AT2G33040.1	XP_007037567.2	82.154	99	0	548	NC_030852.1	23467002	23467105	LOC18604833	ATP	synthase	subunit	gamma%2C	mitochondrial
AT5G26780.2	XP_007047709.1	82.143	99	0	901	NC_030850.1	4237679	4237768	LOC18611409	serine	hydroxymethyltransferase%2C	mitochondrial
AT2G39730.1	XP_007009268.1	82.143	99	0	823	NC_030859.1	1881236	1881280	LOC18586059	ribulose	bisphosphate	carboxylase/oxygenase	activase	2%2C	chloroplastic	isoform	X1
AT1G56590.1	XP_007031205.2	82.126	99	0	737	NC_030854.1	38998987	38999021	LOC18600602	AP-3	complex	subunit	mu	isoform	X1
AT5G12200.1	XP_017983632.1	82.122	95	0	894	NC_030858.1	30914258	30914338	LOC18589973	dihydropyrimidinase
AT4G01100.2	XP_007051615.1	82.114	99	0	621	NC_030850.1	33916055	33916212	LOC18614017	mitochondrial	adenine	nucleotide	transporter	ADNT1
AT5G14040.1	XP_017975128.1	82.114	97	0	613	NC_030853.1	2987529	2987861	LOC18601107	mitochondrial	phosphate	carrier	protein	3%2C	mitochondrial
AT2G39730.1	XP_017976224.1	82.096	96	0	795	NC_030854.1	1564632	1565053	LOC18597708	ribulose	bisphosphate	carboxylase/oxygenase	activase	2%2C	chloroplastic	isoform	X1
AT1G59610.1	XP_017979108.1	82.093	85	0	1229	NC_030855.1	209886	210032	LOC18595033	dynamin-2A	isoform	X2
AT4G21105.1	XP_007015915.1	82.09	97	5.07e-37	118	NC_030858.1	34549933	34550088	LOC18590374	uncharacterized	protein	LOC18590374
AT1G04120.1	XP_007050143.2	82.089	99	0	2518	NC_030850.1	26343104	26345224	LOC18613052	ABC	transporter	C	family	member	5
AT4G13430.1	XP_007035281.2	82.087	99	0	899	NC_030853.1	29711480	29711533	LOC18603323	3-isopropylmalate	dehydratase	large	subunit
AT1G18100.1	XP_017972435.1	82.081	99	9.65e-106	300	NC_030852.1	4673517	4673711	LOC18604303	protein	MOTHER	of	FT	and	TFL1
AT5G43430.4	XP_007035089.2	82.072	89	6.41e-153	427	NC_030853.1	29027248	29027316	LOC18603199	electron	transfer	flavoprotein	subunit	beta%2C	mitochondrial
AT3G48000.1	XP_017973617.1	82.066	95	0	897	NC_030852.1	558655	558739	LOC18603880	aldehyde	dehydrogenase	family	2	member	B4%2C	mitochondrial
AT5G49910.1	XP_017974233.1	82.058	99	0	1171	NC_030853.1	23696355	23696362	LOC18602333	heat	shock	70	kDa	protein	6%2C	chloroplastic
AT1G35580.1	XP_017981050.1	82.057	82	0	798	NC_030857.1	16825695	16826081	LOC18592971	alkaline/neutral	invertase	CINV2	isoform	X2
AT1G52760.1	XP_017979413.1	82.051	94	0	559	NC_030855.1	13802250	13802550	LOC18595801	caffeoylshikimate	esterase
AT2G38130.1	XP_007032030.1	82.036	87	2.92e-101	290	NC_030853.1	3132208	3132396	LOC18601134	N-alpha-acetyltransferase	MAK3
AT4G18430.1	XP_007021623.1	82.028	99	1.62e-138	386	NC_030856.1	6032727	6032947	LOC18594102	ras-related	protein	RABA1f
AT4G25960.1	XP_007040642.2	82.026	96	0	2074	NC_030852.1	35427855	35428121	LOC18606786	ABC	transporter	B	family	member	2
AT4G25960.1	XP_007040641.2	82.026	96	0	2074	NC_030852.1	35427855	35428121	LOC18606786	ABC	transporter	B	family	member	2
AT5G11520.1	XP_007012061.2	82.022	98	0	782	NC_030858.1	2053848	2054039	LOC18587936	aspartate	aminotransferase%2C	cytoplasmic
AT5G02870.1	XP_007048146.2	82.02	99	0	679	NC_030850.1	6167510	6168616	LOC18611695	60S	ribosomal	protein	4
AT2G40490.1	XP_007011236.2	82.011	96	0	641	NC_030859.1	20973844	20973949	LOC18587413	uroporphyrinogen	decarboxylase
AT3G58730.1	XP_017969875.1	81.992	99	1.95e-161	448	NC_030850.1	9447262	9448047	LOC18612121	V-type	proton	ATPase	subunit	D
AT3G58730.1	XP_017969876.1	81.992	99	1.95e-161	448	NC_030850.1	9447262	9448047	LOC18612121	V-type	proton	ATPase	subunit	D
AT4G36410.1	XP_007017641.1	81.988	99	1.22e-94	271	NC_030857.1	1476649	1476678	LOC18591456	probable	ubiquitin-conjugating	enzyme	E2	18
AT1G05350.1	XP_017973784.1	81.984	88	0	638	NC_030852.1	25912656	25912766	LOC18605105	ubiquitin-like	modifier-activating	enzyme	5	isoform	X2
AT3G55800.1	XP_007009096.2	81.98	99	0	652	NC_030859.1	1319737	1319850	LOC18585949	sedoheptulose-1%2C7-bisphosphatase%2C	chloroplastic
AT5G27320.1	XP_007030757.1	81.977	99	0	594	NC_030854.1	37624016	37624054	LOC18600326	gibberellin	receptor	GID1C
AT2G01090.1	XP_007041603.1	81.967	97	3.14e-33	108	NC_030851.1	2228272	2228273	LOC18607392	cytochrome	b-c1	complex	subunit	6
AT2G01090.1	XP_017972101.1	81.967	97	3.14e-33	108	NC_030851.1	2228272	2228273	LOC18607392	cytochrome	b-c1	complex	subunit	6
AT3G24170.1	XP_007034407.2	81.964	99	0	868	NC_030853.1	26535271	26535411	LOC18602753	glutathione	reductase%2C	chloroplastic
AT3G24170.1	XP_007034406.2	81.964	99	0	868	NC_030853.1	26535271	26535411	LOC18602753	glutathione	reductase%2C	chloroplastic
AT3G10640.1	XP_007010475.2	81.933	99	2.2e-141	395	NC_030859.1	15068776	15068844	LOC18586845	charged	multivesicular	body	protein	5
AT5G30510.1	XP_017975185.1	81.928	99	0	670	NC_030853.1	31518358	31518648	LOC18603716	30S	ribosomal	protein	S1%2C	chloroplastic
AT5G16715.1	XP_017975497.1	81.925	78	0	1314	NC_030853.1	19509746	19509782	LOC18601866	valine--tRNA	ligase%2C	chloroplastic/mitochondrial	2	isoform	X5
AT3G19820.1	XP_007045589.2	81.915	99	0	971	NC_030851.1	38294861	38296108	LOC18610069	delta(24)-sterol	reductase
AT3G17210.1	XP_007030647.1	81.905	95	2.84e-61	182	NC_030854.1	37175072	37175401	LOC18600253	stress-response	A/B	barrel	domain-containing	protein	HS1
AT5G41650.1	XP_007040409.2	81.897	98	1.62e-70	206	NC_030852.1	34696232	34696398	LOC18606630	uncharacterized	protein	LOC18606630
AT5G60660.1	XP_007016740.2	81.882	97	1.21e-172	479	NC_030858.1	37355126	37355444	LOC18590876	probable	aquaporin	PIP2-2
AT5G54960.1	XP_017976156.1	81.878	99	0	1044	NC_030854.1	523102	523626	LOC18597502	pyruvate	decarboxylase	1
AT5G64840.1	XP_017982071.1	81.844	99	0	1140	NC_030850.1	6087477	6088298	LOC18611684	ABC	transporter	F	family	member	5
AT5G66880.1	XP_007042344.1	81.818	99	0	632	NC_030851.1	4717802	4717809	LOC18607880	serine/threonine-protein	kinase	SRK2E
AT5G46110.4	XP_007045891.2	81.818	77	0	549	NC_030851.1	39565543	39565862	LOC18610271	triose	phosphate/phosphate	translocator%2C	chloroplastic
AT3G17770.1	XP_017973442.1	81.818	99	0	965	NC_030852.1	9763403	9763442	LOC18604460	putative	3%2C4-dihydroxy-2-butanone	kinase
AT4G14880.1	XP_007030649.2	81.818	99	0	505	NC_030854.1	37182050	37182088	LOC18600255	cysteine	synthase
AT4G14880.1	XP_007030650.2	81.818	99	0	505	NC_030854.1	37182050	37182088	LOC18600255	cysteine	synthase
AT3G42050.1	XP_017977632.1	81.818	99	0	775	NC_030854.1	32419745	32419774	LOC18599585	V-type	proton	ATPase	subunit	H
AT3G42050.1	XP_017977631.1	81.818	99	0	775	NC_030854.1	32419745	32419774	LOC18599585	V-type	proton	ATPase	subunit	H
AT4G22310.1	XP_007026239.1	81.818	99	2.73e-66	195	NC_030855.1	25744403	25744457	LOC18597259	mitochondrial	pyruvate	carrier	4
AT1G73060.1	XP_017979341.1	81.818	89	0	545	NC_030855.1	4160614	4160921	LOC18595439	protein	LOW	PSII	ACCUMULATION	3%2C	chloroplastic	isoform	X1
AT2G18170.1	XP_007017621.1	81.793	99	0	645	NC_030857.1	1415410	1415832	LOC18591440	mitogen-activated	protein	kinase	homolog	NTF3
AT1G76670.1	XP_007018603.2	81.792	99	0	556	NC_030857.1	4700752	4700887	LOC18592053	UDP-galactose	transporter	2
AT5G18520.1	XP_007027143.1	81.775	95	0	695	NC_030854.1	2270386	2271702	LOC18597843	protein	GPR107
AT5G61140.2	XP_017973203.1	81.757	97	0	3564	NC_030852.1	23407624	23407733	LOC18604822	DExH-box	ATP-dependent	RNA	helicase	DExH14
AT4G24690.1	XP_007036387.2	81.72	80	1.03e-41	163	NC_030852.1	1589420	1589443	LOC18604033	protein	NBR1	homolog
AT4G27630.3	XP_017977284.1	81.707	99	0	767	NC_030854.1	32307261	32307475	LOC18599598	GPCR-type	G	protein	1	isoform	X1
AT4G27630.3	XP_007029699.1	81.707	99	0	767	NC_030854.1	32307261	32307475	LOC18599598	GPCR-type	G	protein	1	isoform	X1
AT2G16060.1	XP_007041393.1	81.699	95	1.1e-89	258	NC_030851.1	1650877	1650989	LOC18607267	non-symbiotic	hemoglobin	1
AT5G60770.1	XP_007016829.1	81.698	99	0	906	NC_030858.1	37748647	37749456	LOC18590935	high-affinity	nitrate	transporter	2.1
AT5G52560.1	XP_017981698.1	81.685	89	0	934	NC_030857.1	7079247	7079348	LOC18592423	UDP-sugar	pyrophosphorylase	isoform	X2
AT5G52560.1	XP_017981700.1	81.685	89	0	934	NC_030857.1	7079247	7079348	LOC18592423	UDP-sugar	pyrophosphorylase	isoform	X3
AT3G14930.1	XP_017980720.1	81.682	79	0	591	NC_030856.1	6602854	6603180	LOC18594181	uroporphyrinogen	decarboxylase	1%2C	chloroplastic	isoform	X2
AT5G03940.1	XP_007027779.2	81.675	99	0	917	NC_030854.1	6109580	6109753	LOC18598256	signal	recognition	particle	54	kDa	protein%2C	chloroplastic
AT4G21750.1	XP_007026004.1	81.662	99	0	1254	NC_030855.1	25096072	25096289	LOC18597106	homeobox-leucine	zipper	protein	MERISTEM	1
AT4G21750.1	XP_007026003.1	81.662	99	0	1254	NC_030855.1	25096072	25096289	LOC18597106	homeobox-leucine	zipper	protein	MERISTEM	1
AT4G21750.1	XP_007026002.1	81.662	99	0	1254	NC_030855.1	25096072	25096289	LOC18597106	homeobox-leucine	zipper	protein	MERISTEM	1
AT1G77120.1	XP_007019379.2	81.649	99	0	656	NC_030857.1	8735549	8735585	LOC18592528	alcohol	dehydrogenase	1
AT2G39730.1	XP_017976225.1	81.646	99	0	816	NC_030854.1	1564430	1564474	LOC18597708	ribulose	bisphosphate	carboxylase/oxygenase	activase	2%2C	chloroplastic	isoform	X2
AT1G55490.1	XP_007024263.2	81.639	99	0	979	NC_030855.1	17949070	17949309	LOC18595992	ruBisCO	large	subunit-binding	protein	subunit	beta%2C	chloroplastic
AT2G25930.1	XP_017979093.1	81.633	76	8.07e-20	94.4	NC_030855.1	18793965	18794192	LOC18596071	protein	EARLY	FLOWERING	3
AT2G43710.1	XP_017974120.1	81.627	83	0	585	NC_030853.1	23768810	23769247	LOC18602347	stearoyl-[acyl-carrier-protein]	9-desaturase%2C	chloroplastic	isoform	X2
AT5G14640.1	XP_017981217.1	81.606	92	0	680	NC_030850.1	34873244	34873306	LOC18614206	shaggy-related	protein	kinase	theta	isoform	X1
AT1G26470.1	XP_007045892.2	81.579	85	7.25e-55	167	NC_030851.1	39567682	39567783	LOC18610272	uncharacterized	protein	LOC18610272
AT2G26400.2	XP_017975039.1	81.564	77	8.59e-113	321	NC_030853.1	28238723	28238740	LOC18603054	1%2C2-dihydroxy-3-keto-5-methylthiopentene	dioxygenase	2
AT5G04590.1	XP_017982825.1	81.562	99	0	1092	NC_030858.1	29505270	29505440	LOC18589854	sulfite	reductase	[ferredoxin]%2C	chloroplastic
AT5G49630.1	XP_007018375.2	81.551	99	0	816	NC_030857.1	3878152	3878263	LOC18591895	amino	acid	permease	6
AT5G42020.3	XP_017977288.1	81.55	91	0	1078	NC_030854.1	38322065	38322113	LOC18600465	luminal-binding	protein	5	isoform	X1
AT1G59760.1	XP_017979222.1	81.534	99	0	1669	NC_030855.1	1525113	1525373	LOC18595202	DExH-box	ATP-dependent	RNA	helicase	DExH9
AT1G59760.1	XP_017979221.1	81.534	99	0	1669	NC_030855.1	1525113	1525373	LOC18595202	DExH-box	ATP-dependent	RNA	helicase	DExH9
AT5G64250.2	XP_007042916.2	81.515	99	0	557	NC_030851.1	6919572	6919706	LOC18608263	nitronate	monooxygenase	isoform	X1
AT4G16760.1	XP_007039778.2	81.476	99	0	1154	NC_030852.1	32462554	32462691	LOC18606225	peroxisomal	acyl-coenzyme	A	oxidase	1
AT5G62530.1	XP_007037248.2	81.475	99	0	967	NC_030852.1	17389272	17389357	LOC18604617	delta-1-pyrroline-5-carboxylate	dehydrogenase	12A1%2C	mitochondrial	isoform	X2
AT5G56030.2	XP_007040338.1	81.461	97	0	1129	NC_030852.1	34438080	34438220	LOC18606583	heat	shock	protein	83
AT5G61790.1	XP_007038183.2	81.443	91	0	781	NC_030852.1	26700091	26700174	LOC18605229	calnexin	homolog
AT5G63850.1	XP_007048507.2	81.441	98	0	793	NC_030850.1	7919633	7919753	LOC18611937	amino	acid	permease	4
AT5G63850.1	XP_007048506.2	81.441	98	0	793	NC_030850.1	7919633	7919753	LOC18611937	amino	acid	permease	4
AT4G26710.1	XP_017980432.1	81.429	99	1.47e-37	119	NC_030856.1	10017380	10017477	LOC108662943	V-type	proton	ATPase	subunit	e1
AT4G26710.1	XP_017980433.1	81.429	99	1.47e-37	119	NC_030856.1	10017380	10017477	LOC108662943	V-type	proton	ATPase	subunit	e1
AT4G26710.1	XP_017980431.1	81.429	99	1.47e-37	119	NC_030856.1	10017380	10017477	LOC108662943	V-type	proton	ATPase	subunit	e1
AT5G26110.1	XP_017978535.1	81.416	99	2.77e-141	394	NC_030850.1	29348370	29348438	LOC18613298	EKC/KEOPS	complex	subunit	bud32
AT5G16715.1	XP_017975494.1	81.412	98	0	1640	NC_030853.1	19512308	19512461	LOC18601866	valine--tRNA	ligase%2C	chloroplastic/mitochondrial	2	isoform	X2
AT5G13420.1	XP_007043770.2	81.406	99	0	687	NC_030851.1	12350025	12350212	LOC18608825	transaldolase
AT1G01610.1	XP_017977652.1	81.4	99	0	792	NC_030850.1	34487835	34488145	LOC18614127	probable	glycerol-3-phosphate	acyltransferase	8
AT1G29330.1	XP_007025304.1	81.395	99	7.8e-136	379	NC_030855.1	22734117	22734207	LOC18596635	ER	lumen	protein-retaining	receptor	A
AT3G26650.1	XP_017981240.1	81.395	86	0	518	NC_030857.1	2865799	2865822	LOC18591736	glyceraldehyde-3-phosphate	dehydrogenase	B%2C	chloroplastic	isoform	X2
AT4G33680.1	XP_017971084.1	81.385	99	0	762	NC_030851.1	1752657	1752739	LOC18607295	LL-diaminopimelate	aminotransferase%2C	chloroplastic	isoform	X2
AT4G35830.1	XP_017980157.1	81.382	99	0	1549	NC_030856.1	1857306	1857363	LOC18593492	LOW	QUALITY	PROTEIN:	aconitate	hydratase%2C	cytoplasmic
AT5G45560.1	XP_007040789.1	81.379	99	0	1217	NC_030852.1	35866352	35866489	LOC18606871	protein	ENHANCED	DISEASE	RESISTANCE	2
AT5G40780.1	XP_007031759.1	81.379	97	0	714	NC_030853.1	1741878	1741931	LOC18600941	lysine	histidine	transporter	1
AT3G07690.1	XP_017984583.1	81.375	97	0	769	NC_030859.1	174149	174809	LOC18585727	probable	glycerol-3-phosphate	dehydrogenase	[NAD(+)]	1%2C	cytosolic
AT3G07690.1	XP_007008754.1	81.375	97	0	769	NC_030859.1	174149	174809	LOC18585727	probable	glycerol-3-phosphate	dehydrogenase	[NAD(+)]	1%2C	cytosolic
AT1G32060.1	XP_007040771.1	81.373	99	0	686	NC_030852.1	35790851	35791419	LOC18606857	phosphoribulokinase%2C	chloroplastic
AT1G73060.1	XP_007023441.2	81.361	94	0	578	NC_030855.1	4160614	4160921	LOC18595439	protein	LOW	PSII	ACCUMULATION	3%2C	chloroplastic	isoform	X2
AT5G65620.2	XP_017981929.1	81.36	98	0	1303	NC_030850.1	4231347	4231712	LOC18611408	probable	cytosolic	oligopeptidase	A
AT5G02040.1	XP_007026902.1	81.34	99	1.39e-117	333	NC_030854.1	1393967	1394124	LOC18597681	PRA1	family	protein	A1
AT1G75500.1	XP_017981769.1	81.33	99	0	611	NC_030857.1	1550391	1550611	LOC18591471	protein	WALLS	ARE	THIN	1
AT5G62530.1	XP_007037249.2	81.329	99	0	962	NC_030852.1	17389272	17389357	LOC18604617	probable	aldehyde	dehydrogenase	isoform	X1
AT1G48270.1	XP_007036007.1	81.329	97	0	539	NC_030853.1	31842075	31842239	LOC18603780	G-protein	coupled	receptor	1
AT1G29260.1	XP_007025371.1	81.329	99	0	572	NC_030855.1	23002976	23003926	LOC18596685	peroxisome	biogenesis	protein	7
AT2G38280.1	XP_007026656.2	81.324	99	0	1391	NC_030854.1	598209	598560	LOC18597517	AMP	deaminase
AT3G22200.2	XP_017980493.1	81.303	92	0	813	NC_030850.1	10928655	10928696	LOC18612261	gamma	aminobutyrate	transaminase	3%2C	chloroplastic	isoform	X1
AT3G22200.2	XP_017980501.1	81.303	92	0	813	NC_030850.1	10929876	10929893	LOC18612261	gamma	aminobutyrate	transaminase	3%2C	chloroplastic	isoform	X2
AT4G37510.1	XP_007047477.2	81.296	98	0	912	NC_030850.1	3381167	3381978	LOC18611256	ribonuclease	III	domain-containing	protein	RNC1%2C	chloroplastic
AT2G15620.1	XP_007042430.2	81.293	99	0	1000	NC_030851.1	5088381	5088750	LOC18607940	ferredoxin--nitrite	reductase%2C	chloroplastic
AT5G06300.1	XP_017977909.1	81.287	78	3.88e-100	288	NC_030854.1	2908743	2908778	LOC18597965	cytokinin	riboside	5'-monophosphate	phosphoribohydrolase	LOG3	isoform	X2
AT4G14160.1	XP_007034166.1	81.282	99	0	1323	NC_030853.1	25556387	25557139	LOC18602606	protein	transport	protein	SEC23
AT3G01290.1	XP_007037220.2	81.272	99	1.19e-174	483	NC_030852.1	17156169	17156357	LOC18604598	hypersensitive-induced	response	protein	1
AT3G01290.1	XP_017973226.1	81.272	99	1.19e-174	483	NC_030852.1	17156169	17156357	LOC18604598	hypersensitive-induced	response	protein	1
AT1G76690.1	XP_007020161.2	81.267	97	0	637	NC_030857.1	17797603	17797712	LOC18593063	putative	12-oxophytodienoate	reductase	11
AT5G46210.1	XP_007025064.2	81.235	99	0	1319	NC_030855.1	21932512	21932839	LOC18596492	cullin-4
AT5G47770.1	XP_017978804.1	81.232	89	0	583	NC_030855.1	26158613	26158723	LOC18597357	farnesyl	pyrophosphate	synthase	1
AT5G40810.1	XP_007023943.2	81.23	99	0	519	NC_030855.1	13087350	13087353	LOC18595778	cytochrome	c1-2%2C	heme	protein%2C	mitochondrial
AT5G35790.1	XP_007049348.2	81.227	93	0	925	NC_030850.1	13329877	13330081	LOC18612476	glucose-6-phosphate	1-dehydrogenase	1%2C	chloroplastic	isoform	X2
AT5G22950.1	XP_007010008.1	81.223	99	3.11e-129	363	NC_030859.1	4879854	4879965	LOC18586505	vacuolar	protein	sorting-associated	protein	24	homolog	1
AT5G02270.2	XP_017976090.1	81.214	96	0	562	NC_030854.1	1762506	1762671	LOC18597751	ABC	transporter	I	family	member	20
AT4G33680.1	XP_017971083.1	81.21	99	0	758	NC_030851.1	1752657	1752739	LOC18607295	LL-diaminopimelate	aminotransferase%2C	chloroplastic	isoform	X1
AT5G21090.1	XP_007016687.2	81.193	99	2.68e-125	353	NC_030858.1	37232875	37233083	LOC18590853	BRASSINOSTEROID	INSENSITIVE	1-associated	receptor	kinase	1
AT5G56530.1	XP_007014051.2	81.19	99	0	722	NC_030858.1	21313618	21313794	LOC18589144	uncharacterized	protein	LOC18589144
AT5G25450.1	XP_017983339.1	81.188	82	7.14e-46	144	NC_030858.1	8755410	8755503	LOC18588977	cytochrome	b-c1	complex	subunit	2025-01-07	isoform	X2
AT4G38360.2	XP_007041635.1	81.184	97	0	802	NC_030851.1	2326861	2326998	LOC18607409	protein	LAZ1
AT4G15770.1	XP_007035562.1	81.183	99	2.28e-116	328	NC_030853.1	30537104	30537685	LOC18603488	60S	ribosome	subunit	biogenesis	protein	NIP7	homolog
AT5G64250.2	XP_007042917.1	81.181	81	2.85e-167	467	NC_030851.1	6919572	6919706	LOC18608263	nitronate	monooxygenase	isoform	X2
AT1G04850.1	XP_007034322.2	81.159	99	0	603	NC_030853.1	26149876	26150043	LOC18602699	UBX	domain-containing	protein	4
AT1G75220.1	XP_017981205.1	81.148	99	0	800	NC_030857.1	1207583	1207777	LOC18591391	sugar	transporter	ERD6-like	6	isoform	X2
AT1G59610.1	XP_007022852.2	81.142	99	0	1422	NC_030855.1	209886	210032	LOC18595033	dynamin-2B	isoform	X1
AT1G55350.5	XP_017983081.1	81.142	99	0	3474	NC_030858.1	20919474	20919592	LOC18589149	calpain-type	cysteine	protease	DEK1
AT2G43130.1	XP_007034146.1	81.132	98	3.74e-124	350	NC_030853.1	25480247	25480577	LOC18602596	ras-related	protein	RABA5e
AT1G56590.1	XP_007031206.2	81.132	89	2.01e-126	369	NC_030854.1	38998987	38999021	LOC18600602	AP-3	complex	subunit	mu	isoform	X2
AT3G05890.1	XP_017977870.1	81.132	96	2.05e-26	90.5	NC_030854.1	39183921	39184010	LOC18600643	hydrophobic	protein	RCI2B
AT5G51550.1	XP_007038432.2	81.121	99	0	548	NC_030852.1	27657690	27658706	LOC18605389	protein	EXORDIUM-like	3
AT4G17050.1	XP_007039673.2	81.1	97	1.12e-178	495	NC_030852.1	32054150	32054213	LOC18606154	(S)-ureidoglycine	aminohydrolase
AT5G10860.1	XP_007046407.2	81.068	99	5.61e-124	348	NC_030850.1	15352	15609	LOC18610617	CBS	domain-containing	protein	CBSX3%2C	mitochondrial	isoform	X1
AT1G29880.1	XP_007038160.1	81.051	86	0	1085	NC_030852.1	26635379	26635564	LOC18605212	glycine--tRNA	ligase%2C	mitochondrial	1
AT1G56340.1	XP_007031136.2	81.043	99	0	619	NC_030854.1	38801016	38801115	LOC18600563	calreticulin
AT4G37470.1	XP_017969914.1	81.041	99	7.5e-169	467	NC_030850.1	3309981	3310348	LOC18611242	probable	esterase	D14L
AT5G61510.1	XP_007038323.2	81.02	87	0	572	NC_030852.1	27150698	27150955	LOC18605318	quinone	oxidoreductase
AT5G54800.1	XP_007020963.1	81.016	95	0	596	NC_030856.1	2529769	2530269	LOC18593591	glucose-6-phosphate/phosphate	translocator	1%2C	chloroplastic
AT2G32950.1	XP_017969298.1	81.001	99	0	1137	NC_030850.1	12070227	12070550	LOC18612361	E3	ubiquitin-protein	ligase	COP1	isoform	X2
AT3G21250.4	XP_017979302.1	80.995	99	0	756	NC_030855.1	19160167	19160191	LOC18596124	ABC	transporter	C	family	member	8	isoform	X2
AT5G63890.2	XP_007011325.2	80.994	99	0	780	NC_030859.1	21431087	21431177	LOC18587479	histidinol	dehydrogenase%2C	chloroplastic	isoform	X2
AT2G05170.1	XP_017969517.1	80.993	99	0	1604	NC_030850.1	13047175	13047399	LOC18612448	vacuolar	protein-sorting-associated	protein	11	homolog
AT2G25110.1	XP_007011740.1	80.978	84	6.15e-116	329	NC_030858.1	891212	891319	LOC18587718	stromal	cell-derived	factor	2-like	protein
AT5G19140.1	XP_017975287.1	80.973	96	6.7e-140	391	NC_030853.1	27465684	27465886	LOC18602910	stem-specific	protein	TSJT1	isoform	X2
AT4G17040.1	XP_007039689.1	80.969	94	1.67e-158	444	NC_030852.1	32110454	32110723	LOC18606167	ATP-dependent	Clp	protease	proteolytic	subunit-related	protein	4%2C	chloroplastic
AT1G04680.1	XP_007049844.2	80.964	91	0	659	NC_030850.1	17698606	17698706	LOC18612829	probable	pectate	lyase	8
AT5G17380.1	XP_017975490.1	80.961	98	0	926	NC_030853.1	20719086	20720468	LOC18601969	2-hydroxyacyl-CoA	lyase
AT4G14800.2	XP_007034810.1	80.93	99	1.09e-127	358	NC_030853.1	28067827	28067984	LOC18603022	proteasome	subunit	beta	type-2-A
AT4G19120.1	XP_017973635.1	80.929	99	0	1043	NC_030852.1	35949677	35949955	LOC18606889	probable	methyltransferase	PMT21
AT4G19120.1	XP_017973634.1	80.929	99	0	1043	NC_030852.1	35949677	35949955	LOC18606889	probable	methyltransferase	PMT21
AT4G19120.1	XP_007040819.1	80.929	99	0	1043	NC_030852.1	35949677	35949955	LOC18606889	probable	methyltransferase	PMT21
AT4G19120.1	XP_007040818.1	80.929	99	0	1043	NC_030852.1	35949677	35949955	LOC18606889	probable	methyltransferase	PMT21
AT3G63140.1	XP_007050621.2	80.925	85	0	580	NC_030850.1	29771043	29771420	LOC18613359	chloroplast	stem-loop	binding	protein	of	41	kDa	a%2C	chloroplastic	isoform	X2
AT5G16710.1	XP_007033019.2	80.909	85	1.3e-136	385	NC_030853.1	19528536	19528746	LOC18601869	glutathione	S-transferase	DHAR3%2C	chloroplastic
AT1G75990.1	XP_007041789.2	80.903	99	0	772	NC_030851.1	2865651	2865729	LOC18607522	probable	26S	proteasome	non-ATPase	regulatory	subunit	3
AT1G75990.1	XP_007041788.2	80.903	99	0	772	NC_030851.1	2865651	2865729	LOC18607522	probable	26S	proteasome	non-ATPase	regulatory	subunit	3
AT5G12860.1	XP_017983480.1	80.893	99	0	872	NC_030858.1	29321722	29322816	LOC18589835	dicarboxylate	transporter	1%2C	chloroplastic
AT1G26630.1	XP_007045977.2	80.892	98	3.07e-94	270	NC_030851.1	39806111	39806233	LOC18610325	eukaryotic	translation	initiation	factor	5A-2
AT5G39740.1	XP_007033700.2	80.872	99	0	507	NC_030853.1	23648921	23648923	LOC18602329	60S	ribosomal	protein	5
AT4G34100.1	XP_007042477.2	80.857	94	0	1735	NC_030851.1	5226014	5226376	LOC18607965	probable	E3	ubiquitin	ligase	SUD1	isoform	X1
AT2G14170.1	XP_017971062.1	80.855	88	0	913	NC_030851.1	6473221	6473248	LOC18608184	methylmalonate-semialdehyde	dehydrogenase	[acylating]%2C	mitochondrial
AT2G21390.1	XP_007017678.2	80.851	99	0	2115	NC_030857.1	1591225	1591432	LOC18591478	coatomer	subunit	alpha-1
AT5G34850.1	XP_007013583.2	80.846	94	0	785	NC_030858.1	7515436	7515627	LOC18588841	bifunctional	purple	acid	phosphatase	26	isoform	X1
AT5G34850.1	XP_017982859.1	80.846	94	0	785	NC_030858.1	7515436	7515627	LOC18588841	bifunctional	purple	acid	phosphatase	26	isoform	X1
AT5G34850.1	XP_017982860.1	80.846	94	0	785	NC_030858.1	7515436	7515609	LOC18588841	bifunctional	purple	acid	phosphatase	26	isoform	X2
AT5G46860.1	XP_007040664.1	80.843	95	1.95e-140	395	NC_030852.1	35480194	35480381	LOC18606796	syntaxin-22
AT4G39890.1	XP_017982909.1	80.841	99	2.16e-124	350	NC_030850.1	5303165	5303281	LOC18611565	ras-related	protein	RABH1e
AT5G23140.1	XP_007043296.2	80.833	99	7.5e-148	412	NC_030851.1	8514854	8515151	LOC18608504	ATP-dependent	Clp	protease	proteolytic	subunit	2%2C	mitochondrial
AT5G40890.1	XP_007031850.2	80.828	93	0	1178	NC_030853.1	2188601	2188794	LOC18600995	chloride	channel	protein	CLC-b	isoform	X1
AT4G30190.2	XP_017979288.1	80.828	93	0	1498	NC_030855.1	3536098	3536166	LOC18595398	ATPase	9%2C	plasma	membrane-type
AT2G17420.1	XP_007047789.2	80.826	88	0	582	NC_030850.1	4600132	4601191	LOC18611463	thioredoxin	reductase	NTRB
AT5G16715.1	XP_017975493.1	80.825	98	0	1633	NC_030853.1	19512308	19512461	LOC18601866	valine--tRNA	ligase%2C	chloroplastic/mitochondrial	2	isoform	X1
AT5G16715.1	XP_017975492.1	80.825	98	0	1633	NC_030853.1	19512308	19512461	LOC18601866	valine--tRNA	ligase%2C	chloroplastic/mitochondrial	2	isoform	X1
AT5G16715.1	XP_017975491.1	80.825	98	0	1633	NC_030853.1	19512308	19512461	LOC18601866	valine--tRNA	ligase%2C	chloroplastic/mitochondrial	2	isoform	X1
AT2G47180.1	XP_007051210.2	80.814	99	0	570	NC_030850.1	32316488	32316817	LOC18613754	galactinol	synthase	1
AT1G08110.4	XP_007016854.1	80.791	75	7.35e-111	316	NC_030858.1	37842904	37842999	LOC18590952	lactoylglutathione	lyase	isoform	X2
AT5G54770.1	XP_007021022.1	80.78	99	0	555	NC_030856.1	2843886	2844311	LOC18593644	thiamine	thiazole	synthase%2C	chloroplastic
AT5G44370.1	XP_007043074.1	80.769	99	0	736	NC_030851.1	7648823	7650151	LOC18608366	probable	anion	transporter	5
AT4G23100.1	XP_007040226.2	80.762	99	0	873	NC_030852.1	34101025	34101359	LOC18606518	glutamate--cysteine	ligase%2C	chloroplastic	isoform	X1
AT1G04680.1	XP_007034463.2	80.761	99	0	723	NC_030853.1	26837447	26837544	LOC18602793	probable	pectate	lyase	1
AT1G03070.1	XP_007050515.1	80.738	98	1.05e-146	409	NC_030850.1	29270795	29271047	LOC18613287	BI1-like	protein
AT1G12640.1	XP_007023106.1	80.736	99	0	768	NC_030855.1	1536843	1537144	LOC18595203	lysophospholipid	acyltransferase	1
AT4G30190.2	XP_007012006.2	80.734	99	0	1595	NC_030858.1	1800900	1800956	LOC18587897	ATPase	8%2C	plasma	membrane-type
AT1G07810.1	XP_007027146.2	80.729	98	0	1717	NC_030854.1	2286841	2288256	LOC18597846	calcium-transporting	ATPase	1%2C	endoplasmic	reticulum-type
AT4G26520.1	XP_007020393.1	80.726	99	0	588	NC_030856.1	466144	466171	LOC18593221	fructose-bisphosphate	aldolase%2C	cytoplasmic	isozyme	1
AT2G29650.1	XP_017977628.1	80.714	82	0	715	NC_030850.1	34481653	34481748	LOC18614126	ascorbate	transporter%2C	chloroplastic	isoform	X4
AT5G65750.1	XP_017984501.1	80.705	99	0	1766	NC_030859.1	2374975	2376525	LOC18586144	2-oxoglutarate	dehydrogenase%2C	mitochondrial
AT1G50500.2	XP_017973104.1	80.692	82	0	1147	NC_030852.1	31765326	31765374	LOC18606115	vacuolar	protein	sorting-associated	protein	53	A	isoform	X2
AT1G52230.1	XP_007024186.1	80.69	99	2.76e-66	197	NC_030855.1	17144228	17144355	LOC18595946	photosystem	I	reaction	center	subunit	VI%2C	chloroplastic
AT5G19140.1	XP_007034633.1	80.687	99	3.17e-143	399	NC_030853.1	27465684	27465886	LOC18602910	stem-specific	protein	TSJT1	isoform	X1
AT1G18540.1	XP_017976620.1	80.687	99	4.55e-115	328	NC_030854.1	28258011	28258267	LOC18599068	60S	ribosomal	protein	6
AT3G54540.1	XP_007015261.2	80.685	99	0	1117	NC_030858.1	30915652	30917826	LOC18589974	ABC	transporter	F	family	member	4
AT4G34100.1	XP_017970874.1	80.667	94	0	1727	NC_030851.1	5226014	5226376	LOC18607965	probable	E3	ubiquitin	ligase	SUD1	isoform	X2
AT4G21960.1	XP_007026071.1	80.665	99	0	572	NC_030855.1	25284830	25285054	LOC18597147	peroxidase	42
AT5G50850.1	XP_017973219.1	80.663	99	0	604	NC_030852.1	26306446	26306487	LOC18605171	LOW	QUALITY	PROTEIN:	pyruvate	dehydrogenase	E1	component	subunit	beta-1%2C	mitochondrial
AT3G07750.1	XP_007009948.2	80.657	95	3.24e-170	472	NC_030859.1	4608878	4609003	LOC18586474	exosome	complex	component	RRP42
AT3G07750.1	XP_007009949.2	80.657	95	3.24e-170	472	NC_030859.1	4608878	4609003	LOC18586474	exosome	complex	component	RRP42
AT3G46560.1	XP_007016415.1	80.645	99	3.18e-54	163	NC_030858.1	36345845	36345939	LOC18590688	mitochondrial	import	inner	membrane	translocase	subunit	TIM9
AT5G40890.1	XP_007031847.2	80.637	96	0	1225	NC_030853.1	2188601	2188794	LOC18600995	chloride	channel	protein	CLC-b	isoform	X2
AT4G30190.2	XP_017978099.1	80.632	99	0	1597	NC_030855.1	3558105	3558158	LOC18595399	plasma	membrane	ATPase
AT3G59920.1	XP_007042842.2	80.631	99	0	760	NC_030851.1	6588981	6589067	LOC18608208	guanosine	nucleotide	diphosphate	dissociation	inhibitor	At5g09550
AT5G54640.1	XP_007050747.1	80.62	96	9.72e-68	201	NC_030850.1	30393814	30394011	LOC18613448	histone	H2AX
AT5G40440.1	XP_007031564.2	80.62	99	0	883	NC_030853.1	986328	986429	LOC18600823	mitogen-activated	protein	kinase	kinase	3
AT1G66340.1	XP_017980587.1	80.612	99	0	1269	NC_030856.1	9664431	9665336	LOC18594532	ethylene	receptor	isoform	X1
AT1G66340.1	XP_017980586.1	80.612	99	0	1269	NC_030856.1	9664431	9665336	LOC18594532	ethylene	receptor	isoform	X1
AT1G66340.1	XP_017980585.1	80.612	99	0	1269	NC_030856.1	9664431	9665336	LOC18594532	ethylene	receptor	isoform	X1
AT2G26710.1	XP_007013339.1	80.612	93	0	835	NC_030858.1	6495168	6495444	LOC18588701	cytochrome	P450	734A1
AT5G54590.2	XP_007021107.2	80.6	98	0	699	NC_030856.1	3128587	3128900	LOC18593700	calcium/calmodulin-regulated	receptor-like	kinase	1
AT5G54590.2	XP_007021106.2	80.6	98	0	699	NC_030856.1	3128587	3128900	LOC18593700	calcium/calmodulin-regulated	receptor-like	kinase	1
AT5G63860.1	XP_007048504.2	80.594	99	0	742	NC_030850.1	7906877	7906973	LOC18611936	ultraviolet-B	receptor	UVR8	isoform	X4
AT4G08920.1	XP_007018772.1	80.584	98	0	1082	NC_030857.1	5244204	5244516	LOC18592152	cryptochrome-1	isoform	X1
AT4G08920.1	XP_017981544.1	80.584	98	0	1082	NC_030857.1	5244204	5244516	LOC18592152	cryptochrome-1	isoform	X2
AT3G17210.1	XP_007035905.2	80.583	94	5.71e-59	177	NC_030853.1	31526581	31526765	LOC18603719	stress-response	A/B	barrel	domain-containing	protein	HS1
AT5G39040.1	XP_007032789.2	80.578	96	0	997	NC_030853.1	17433348	17433431	LOC18601682	ABC	transporter	B	family	member	27
AT3G01290.1	XP_017975469.1	80.565	99	4.38e-175	484	NC_030853.1	12696153	12696341	LOC18601448	hypersensitive-induced	response	protein	1
AT3G01290.1	XP_007032448.1	80.565	99	4.38e-175	484	NC_030853.1	12696153	12696341	LOC18601448	hypersensitive-induced	response	protein	1
AT3G01290.1	XP_007032449.1	80.565	99	4.38e-175	484	NC_030853.1	12696153	12696341	LOC18601448	hypersensitive-induced	response	protein	1
AT5G63890.2	XP_017985008.1	80.562	99	0	778	NC_030859.1	21431087	21431177	LOC18587479	histidinol	dehydrogenase%2C	chloroplastic	isoform	X1
AT1G74560.3	XP_017973506.1	80.556	82	1.11e-119	342	NC_030852.1	21270617	21270745	LOC18604661	NAP1-related	protein	1
AT5G59160.1	XP_017975327.1	80.546	94	0	502	NC_030853.1	7721811	7721979	LOC18601297	serine/threonine-protein	phosphatase	PP1	isozyme	1	isoform	X1
AT5G59160.1	XP_017975326.1	80.546	94	0	502	NC_030853.1	7721811	7721979	LOC18601297	serine/threonine-protein	phosphatase	PP1	isozyme	1	isoform	X1
AT5G16000.1	XP_017974690.1	80.538	99	0	1026	NC_030853.1	22443814	22443931	LOC18602162	protein	NSP-INTERACTING	KINASE	1
AT2G16060.1	XP_007041394.2	80.537	93	9.31e-83	254	NC_030851.1	1656328	1656657	LOC18607268	plastid	division	protein	PDV2
AT2G35190.1	XP_017972742.1	80.534	98	4.51e-147	412	NC_030852.1	31912962	31913038	LOC18606128	novel	plant	SNARE	11
AT5G06530.1	XP_007028065.1	80.533	99	0	1201	NC_030854.1	10796434	10796815	LOC18598463	ABC	transporter	G	family	member	22	isoform	X1
AT5G59160.1	XP_017973279.1	80.528	97	0	525	NC_030852.1	34531122	34531299	LOC18606598	serine/threonine-protein	phosphatase	PP1
AT4G02570.1	XP_007009824.2	80.514	99	0	1238	NC_030859.1	3929826	3932045	LOC18586388	cullin-1
AT2G01690.2	XP_007045262.1	80.507	99	0	1165	NC_030851.1	36508511	36508600	LOC18609872	protein	VAC14	homolog
AT5G35790.1	XP_017969907.1	80.501	93	0	921	NC_030850.1	13329877	13330081	LOC18612476	glucose-6-phosphate	1-dehydrogenase	1%2C	chloroplastic	isoform	X1
AT2G41250.1	XP_007028494.1	80.498	83	2.26e-147	415	NC_030854.1	23855150	23855443	LOC18598765	haloacid	dehalogenase-like	hydrolase	domain-containing	protein	3
AT4G01100.2	XP_017973141.1	80.488	99	0	607	NC_030852.1	34837291	34837448	LOC18606659	mitochondrial	adenine	nucleotide	transporter	ADNT1
AT3G02050.1	XP_007032064.1	80.482	99	0	1314	NC_030853.1	3312703	3312750	LOC18601159	potassium	transporter	4
AT4G05520.1	XP_007026225.2	80.479	99	0	935	NC_030855.1	25713331	25713415	LOC18597251	EH	domain-containing	protein	2	isoform	X1
AT5G48800.1	XP_007049780.2	80.46	96	0	969	NC_030850.1	16940410	16940501	LOC18612788	BTB/POZ	domain-containing	protein	At5g48800	isoform	X1
AT3G60190.1	XP_007039595.2	80.449	99	0	1068	NC_030852.1	31723725	31723862	LOC18606108	dynamin-related	protein	1E
AT2G43280.1	XP_007033943.1	80.435	89	3.02e-113	322	NC_030853.1	24691251	24691251	LOC18602483	protein	FAR1-RELATED	SEQUENCE	5
AT4G14030.1	XP_007034202.2	80.421	97	0	823	NC_030853.1	25723236	25723347	LOC18602629	selenium-binding	protein	1
AT4G09320.1	XP_007038244.1	80.405	99	6.57e-90	258	NC_030852.1	26892732	26892782	LOC18605265	nucleoside	diphosphate	kinase	1
AT4G04350.1	XP_017979311.1	80.405	91	1.03e-70	252	NC_030855.1	25528553	25528953	LOC18597207	leucine--tRNA	ligase%2C	chloroplastic/mitochondrial	isoform	X2
AT5G24840.1	XP_017974897.1	80.4	98	9.7e-149	415	NC_030853.1	30951935	30952690	LOC18603584	tRNA	(guanine-N(7)-)-methyltransferase
AT3G60190.1	XP_017985067.1	80.396	89	0	933	NC_030859.1	139206	139323	LOC18585719	dynamin-related	protein	1E
AT5G55160.2	XP_007049747.1	80.392	86	3.36e-52	159	NC_030850.1	16642914	16643015	LOC18612765	small	ubiquitin-related	modifier	1
AT1G15820.1	XP_007043011.2	80.392	98	2.49e-147	412	NC_030851.1	7389285	7389499	LOC18608325	chlorophyll	a-b	binding	protein	CP24	10A%2C	chloroplastic
AT1G18150.1	XP_017973380.1	80.392	84	0	821	NC_030852.1	4966389	4966785	LOC18604309	mitogen-activated	protein	kinase	9	isoform	X2
AT5G01220.1	XP_007026774.2	80.365	85	0	736	NC_030854.1	953648	954015	LOC18597586	sulfoquinovosyl	transferase	SQD2	isoform	X2
AT2G26910.1	XP_017983198.1	80.352	99	0	2414	NC_030858.1	6237093	6237367	LOC18588667	ABC	transporter	G	family	member	32
AT4G27640.1	XP_017971735.1	80.349	87	0	1494	NC_030851.1	36822828	36823102	LOC18609908	importin-4	isoform	X2
AT3G10920.1	XP_007011340.1	80.349	99	5.82e-140	391	NC_030859.1	21452037	21452328	LOC18587487	superoxide	dismutase	[Mn]%2C	mitochondrial
AT1G75220.1	XP_017969392.1	80.328	99	0	806	NC_030850.1	1536796	1537254	LOC18610920	sugar	transporter	ERD6-like	6
AT1G48850.1	XP_017985078.1	80.328	84	0	619	NC_030859.1	3899583	3899715	LOC18586384	chorismate	synthase%2C	chloroplastic	isoform	X2
AT1G63770.3	XP_017973495.1	80.302	99	0	1650	NC_030852.1	34259219	34259296	LOC18606548	puromycin-sensitive	aminopeptidase
AT5G37510.2	XP_007032280.2	80.295	99	0	1221	NC_030853.1	8037014	8037428	LOC18601306	NADH	dehydrogenase	[ubiquinone]	iron-sulfur	protein	1%2C	mitochondrial
AT4G05520.1	XP_007026226.2	80.295	99	0	929	NC_030855.1	25713331	25713415	LOC18597251	EH	domain-containing	protein	2	isoform	X2
AT1G49820.1	XP_007042544.2	80.288	99	0	707	NC_030851.1	5505493	5505678	LOC18608018	methylthioribose	kinase
AT3G55610.1	XP_007009199.2	80.28	98	0	1147	NC_030859.1	1682434	1682493	LOC18586020	delta-1-pyrroline-5-carboxylate	synthase
AT3G06860.1	XP_007035631.2	80.276	99	0	1222	NC_030853.1	30722942	30723044	LOC18603530	peroxisomal	fatty	acid	beta-oxidation	multifunctional	protein	MFP2
AT2G43945.1	XP_017976909.1	80.275	75	4.64e-129	366	NC_030854.1	29710283	29710318	LOC18599247	uncharacterized	protein	LOC18599247	isoform	X2
AT1G18540.1	XP_007028937.1	80.258	99	4.27e-116	331	NC_030854.1	28253761	28254017	LOC18599067	60S	ribosomal	protein	6
AT4G20150.1	XP_007040984.1	80.247	99	1.09e-46	143	NC_030851.1	106103	106193	LOC18606985	uncharacterized	protein	LOC18606985
AT1G21760.1	XP_017981645.1	80.243	99	0	564	NC_030857.1	6565895	6565904	LOC18592351	F-box	protein	7
AT5G63860.1	XP_007048505.2	80.227	99	0	737	NC_030850.1	7906877	7906973	LOC18611936	ultraviolet-B	receptor	UVR8	isoform	X3
AT5G37680.1	XP_017972003.1	80.22	98	2.08e-112	317	NC_030851.1	5891220	5891257	LOC18608095	ADP-ribosylation	factor-like	protein	8A	isoform	X1
AT2G06010.1	XP_007012642.1	80.22	96	9.85e-113	318	NC_030858.1	4019154	4019285	LOC18588284	uncharacterized	protein	LOC18588284
AT2G06010.1	XP_007012644.1	80.22	96	9.85e-113	318	NC_030858.1	4019154	4019285	LOC18588284	uncharacterized	protein	LOC18588284
AT1G78050.1	XP_017981848.1	80.212	85	2.05e-174	487	NC_030857.1	5532974	5533235	LOC18592195	2%2C3-bisphosphoglycerate-dependent	phosphoglycerate	mutase
AT1G78050.1	XP_017981849.1	80.212	85	2.05e-174	487	NC_030857.1	5532974	5533235	LOC18592195	2%2C3-bisphosphoglycerate-dependent	phosphoglycerate	mutase
AT5G66060.1	XP_007046593.2	80.208	99	1.03e-167	466	NC_030850.1	529606	529784	LOC18610705	probable	prolyl	4-hydroxylase	10
AT1G59820.1	XP_007044427.2	80.199	99	0	2014	NC_030851.1	29842994	29843170	LOC18609322	phospholipid-transporting	ATPase	3	isoform	X1
AT2G38710.1	XP_017985160.1	80.193	96	1.34e-125	353	NC_030859.1	14252884	14252987	LOC18586803	uncharacterized	protein	At2g38710
AT5G19330.1	XP_017975562.1	80.191	99	0	1168	NC_030853.1	27619331	27619571	LOC18602941	ARM	REPEAT	PROTEIN	INTERACTING	WITH	ABF2	isoform	X1
AT5G22060.1	XP_007010484.1	80.191	99	0	647	NC_030859.1	15197733	15197882	LOC18586851	dnaJ	protein	homolog
AT2G45770.1	XP_017984765.1	80.18	91	0	534	NC_030850.1	34853329	34853631	LOC18614202	cell	division	protein	FtsY	homolog%2C	chloroplastic	isoform	X2
AT4G39330.1	XP_007048215.2	80.168	99	0	582	NC_030850.1	6503981	6504078	LOC18611738	probable	cinnamyl	alcohol	dehydrogenase	9
AT5G19220.1	XP_007034659.2	80.153	99	0	878	NC_030853.1	27541077	27541301	LOC18602926	glucose-1-phosphate	adenylyltransferase	large	subunit	3%2C	chloroplastic/amyloplastic
AT3G01910.1	XP_017975351.1	80.153	99	0	688	NC_030853.1	2228871	2228945	LOC18601002	sulfite	oxidase
AT3G09740.1	XP_007027295.2	80.15	99	7.85e-159	442	NC_030854.1	2707235	2707390	LOC18597928	syntaxin-71
AT3G57530.1	XP_007028795.1	80.148	99	0	895	NC_030854.1	27268066	27268575	LOC18598981	calcium-dependent	protein	kinase	32
AT4G34970.1	XP_007041872.2	80.142	99	1.38e-85	246	NC_030851.1	3092409	3092429	LOC18607566	actin-depolymerizing	factor	5
AT5G61240.2	XP_007045925.2	80.126	93	0	526	NC_030851.1	39662425	39662503	LOC18610292	probable	leucine-rich	repeat	receptor-like	protein	kinase	At1g35710
AT2G18790.1	XP_007035807.2	80.125	95	0	1886	NC_030853.1	31242908	31245002	LOC18603656	phytochrome	B	isoform	X2
AT3G24190.1	XP_017975336.1	80.125	99	0	1291	NC_030853.1	26681765	26681998	LOC18602775	uncharacterized	protein	sll0005
AT5G66190.1	XP_007017817.2	80.109	99	0	579	NC_030857.1	2021810	2021914	LOC18591567	LOW	QUALITY	PROTEIN:	ferredoxin--NADP	reductase%2C	leaf	isozyme%2C	chloroplastic
AT3G18060.1	XP_017973751.1	80.099	99	0	1023	NC_030852.1	4246714	4247105	LOC18604282	actin-interacting	protein	2025-02-01
AT5G06300.1	XP_007027342.1	80.097	94	3.81e-122	345	NC_030854.1	2909142	2909261	LOC18597965	cytokinin	riboside	5'-monophosphate	phosphoribohydrolase	LOG3	isoform	X1
AT5G55990.1	XP_007026412.1	80.088	99	5.7e-128	359	NC_030855.1	26184157	26184280	LOC18597363	calcineurin	B-like	protein	3	isoform	X2
AT4G27640.1	XP_007045324.2	80.076	99	0	1703	NC_030851.1	36822828	36823102	LOC18609908	importin-4	isoform	X1
AT3G22960.1	XP_007034916.1	80.066	99	0	981	NC_030853.1	28403531	28404118	LOC18603091	pyruvate	kinase	isozyme	A%2C	chloroplastic
AT1G74910.1	XP_007032323.1	80.048	99	0	719	NC_030853.1	9593148	9593208	LOC18601343	mannose-1-phosphate	guanyltransferase	alpha	isoform	X2
AT4G21480.1	XP_007025811.2	80.04	99	0	772	NC_030855.1	24460728	24460860	LOC18596968	sugar	carrier	protein	C
AT4G39080.1	XP_007042075.2	80.025	99	0	1347	NC_030851.1	3856889	3857035	LOC18607718	V-type	proton	ATPase	subunit	a3	isoform	X2
AT4G39080.1	XP_007042074.2	80.025	99	0	1352	NC_030851.1	3856889	3857035	LOC18607718	V-type	proton	ATPase	subunit	a3	isoform	X1
AT5G06460.1	XP_017982608.1	80.019	99	0	1779	NC_030858.1	38087865	38088447	LOC18591004	ubiquitin-activating	enzyme	E1	1
AT4G12420.1	XP_007039921.2	80	99	0	970	NC_030852.1	32980579	32980719	LOC18606314	monocopper	oxidase-like	protein	SKU5
AT1G73620.1	XP_017973999.1	80	85	5.22e-139	392	NC_030852.1	5256485	5256629	LOC18604325	thaumatin-like	protein
AT5G54640.1	XP_007027098.1	80	80	4.37e-56	171	NC_030854.1	2063641	2063850	LOC18597809	histone	H2A
AT1G25350.2	XP_007022143.2	80	99	0	1311	NC_030856.1	9426869	9427000	LOC18594509	glutamine--tRNA	ligase%2C	cytoplasmic
AT5G09650.1	XP_007018357.2	80	84	2.04e-151	425	NC_030857.1	3789721	3789912	LOC18591880	soluble	inorganic	pyrophosphatase	6%2C	chloroplastic
AT3G13550.1	XP_007014687.1	80	85	8.03e-95	273	NC_030858.1	23184499	23184709	LOC18589586	constitutive	photomorphogenesis	protein	10
AT1G67280.1	XP_017983488.1	80	99	0	572	NC_030858.1	5494547	5494694	LOC18588548	probable	lactoylglutathione	lyase%2C	chloroplastic
AT4G29870.1	XP_017982049.1	80	99	5.51e-99	283	NC_030858.1	17326404	17326931	LOC18589457	putative	oligosaccharyltransferase	complex	subunit	CG9662
AT3G57520.1	XP_007028791.2	79.974	99	0	1303	NC_030854.1	27240425	27240615	LOC18598978	probable	galactinol--sucrose	galactosyltransferase	2
AT3G57520.1	XP_017977033.1	79.974	99	0	1303	NC_030854.1	27240425	27240615	LOC18598978	probable	galactinol--sucrose	galactosyltransferase	2
AT3G57520.1	XP_017977032.1	79.974	99	0	1303	NC_030854.1	27240425	27240615	LOC18598978	probable	galactinol--sucrose	galactosyltransferase	2
AT4G36480.1	XP_017979238.1	79.958	99	0	781	NC_030855.1	6871951	6872056	LOC18595588	long	chain	base	biosynthesis	protein	1	isoform	X1
AT4G36480.1	XP_007023672.2	79.958	99	0	781	NC_030855.1	6871951	6872056	LOC18595588	long	chain	base	biosynthesis	protein	1	isoform	X1
AT3G25860.1	XP_017970883.1	79.955	90	0	628	NC_030851.1	40709342	40710256	LOC18610503	dihydrolipoyllysine-residue	acetyltransferase	component	4	of	pyruvate	dehydrogenase	complex%2C	chloroplastic
AT2G47180.1	XP_007031210.1	79.937	91	0	536	NC_030854.1	39008480	39008830	LOC18600605	galactinol	synthase	2
AT5G54960.1	XP_007016910.2	79.934	99	0	1025	NC_030858.1	37986633	37987157	LOC18590978	pyruvate	decarboxylase	2
AT1G59820.1	XP_017970758.1	79.931	95	0	1906	NC_030851.1	29843154	29843170	LOC18609322	phospholipid-transporting	ATPase	3	isoform	X2
AT5G42820.1	XP_017980897.1	79.93	99	7.89e-143	402	NC_030850.1	28844416	28845255	LOC18613242	splicing	factor	U2af	small	subunit	B
AT5G13300.1	XP_017970795.1	79.928	99	0	1340	NC_030851.1	12632025	12632069	LOC18608844	ADP-ribosylation	factor	GTPase-activating	protein	AGD3
AT2G47390.1	XP_007051106.2	79.892	95	0	1521	NC_030850.1	31970364	31970676	LOC18613696	probable	glutamyl	endopeptidase%2C	chloroplastic
AT5G37680.1	XP_007047542.1	79.891	99	1.48e-113	320	NC_030850.1	3589227	3589264	LOC18611295	ADP-ribosylation	factor-like	protein	8A
AT3G57870.1	XP_017983807.1	79.888	99	1.3e-103	294	NC_030850.1	2962816	2962884	LOC18611177	SUMO-conjugating	enzyme	SCE1	isoform	X1
AT5G27150.1	XP_017977096.1	79.887	98	0	879	NC_030854.1	34903927	34904103	LOC18599905	sodium/hydrogen	exchanger	2
AT3G05000.1	XP_007030129.1	79.885	99	5.34e-105	298	NC_030854.1	34788229	34788380	LOC18599884	trafficking	protein	particle	complex	subunit	6B
AT1G67280.1	XP_007012108.1	79.88	95	0	550	NC_030858.1	2177469	2177634	LOC18587961	probable	lactoylglutathione	lyase%2C	chloroplastic
AT4G35300.1	XP_017970868.1	79.865	99	0	1165	NC_030851.1	7665956	7666034	LOC18608369	monosaccharide-sensing	protein	2
AT4G35300.1	XP_007043079.2	79.865	99	0	1165	NC_030851.1	7665956	7666034	LOC18608369	monosaccharide-sensing	protein	2
AT1G50500.2	XP_007039609.2	79.859	99	0	1348	NC_030852.1	31765326	31765374	LOC18606115	vacuolar	protein	sorting-associated	protein	53	A	isoform	X1
AT1G50500.2	XP_007039607.2	79.859	99	0	1348	NC_030852.1	31765326	31765374	LOC18606115	vacuolar	protein	sorting-associated	protein	53	A	isoform	X1
AT1G50500.2	XP_017973103.1	79.859	99	0	1348	NC_030852.1	31765326	31765374	LOC18606115	vacuolar	protein	sorting-associated	protein	53	A	isoform	X1
AT1G50500.2	XP_017973102.1	79.859	99	0	1348	NC_030852.1	31765326	31765374	LOC18606115	vacuolar	protein	sorting-associated	protein	53	A	isoform	X1
AT1G74910.1	XP_007032322.1	79.856	99	0	717	NC_030853.1	9593148	9593208	LOC18601343	mannose-1-phosphate	guanyltransferase	alpha	isoform	X1
AT4G04780.1	XP_017979477.1	79.856	99	6.41e-75	219	NC_030855.1	16857453	16857659	LOC18595905	mediator	of	RNA	polymerase	II	transcription	subunit	21
AT4G04780.1	XP_017979478.1	79.856	99	6.41e-75	219	NC_030855.1	16857453	16857659	LOC18595905	mediator	of	RNA	polymerase	II	transcription	subunit	21
AT4G04780.1	XP_017979479.1	79.856	99	6.41e-75	219	NC_030855.1	16857453	16857659	LOC18595905	mediator	of	RNA	polymerase	II	transcription	subunit	21
AT4G17380.1	XP_017973431.1	79.848	99	0	1316	NC_030852.1	32537140	32537205	LOC18606235	DNA	mismatch	repair	protein	MSH4	isoform	X7
AT5G52560.1	XP_007019236.2	79.833	98	0	1011	NC_030857.1	7079247	7079348	LOC18592423	UDP-sugar	pyrophosphorylase	isoform	X1
AT1G60710.1	XP_017974729.1	79.822	97	0	573	NC_030853.1	25304394	25304813	LOC18602567	probable	aldo-keto	reductase	2
AT4G23100.1	XP_017973692.1	79.821	84	0	733	NC_030852.1	34101025	34101359	LOC18606518	glutamate--cysteine	ligase%2C	chloroplastic	isoform	X2
AT5G66570.1	XP_007047093.2	79.819	99	0	545	NC_030850.1	2059684	2059923	LOC18611024	oxygen-evolving	enhancer	protein	1%2C	chloroplastic
AT4G23470.1	XP_007040307.2	79.793	75	2.98e-117	335	NC_030852.1	34337838	34337937	LOC18606562	uncharacterized	protein	LOC18606562
AT5G11670.1	XP_007018504.2	79.791	97	0	989	NC_030858.1	5319401	5319552	LOC18591982	NADP-dependent	malic	enzyme
AT4G31860.1	XP_017983601.1	79.778	97	0	613	NC_030858.1	748281	748397	LOC18587697	probable	protein	phosphatase	2C	60	isoform	X1
AT4G31860.1	XP_017983600.1	79.778	97	0	613	NC_030858.1	748281	748397	LOC18587697	probable	protein	phosphatase	2C	60	isoform	X1
AT4G32690.1	XP_017983796.1	79.769	98	5.65e-96	275	NC_030858.1	1911635	1911771	LOC18587912	two-on-two	hemoglobin-3
AT3G51870.1	XP_017976091.1	79.758	86	0	522	NC_030854.1	786566	786901	LOC18597550	probable	envelope	ADP%2CATP	carrier	protein%2C	chloroplastic
AT5G37680.1	XP_017972004.1	79.755	88	2.77e-98	281	NC_030851.1	5892838	5892900	LOC18608095	ADP-ribosylation	factor-like	protein	8A	isoform	X2
AT2G18790.1	XP_007035808.2	79.754	89	0	1763	NC_030853.1	31242908	31245002	LOC18603656	phytochrome	B	isoform	X1
AT5G47120.1	XP_007039703.1	79.747	95	1.78e-138	389	NC_030852.1	32168591	32168701	LOC18606178	bax	inhibitor	1
AT4G28250.1	XP_007043563.1	79.741	87	2.63e-142	400	NC_030851.1	10715689	10715857	LOC18608689	expansin-B3
AT5G20410.1	XP_017982022.1	79.741	99	0	717	NC_030858.1	7565612	7565929	LOC18588847	monogalactosyldiacylglycerol	synthase	2%2C	chloroplastic
AT5G63110.1	XP_017973970.1	79.739	97	0	759	NC_030852.1	1390621	1391160	LOC18603991	histone	deacetylase	6
AT3G07690.1	XP_007028708.2	79.733	96	0	741	NC_030854.1	25922362	25923019	LOC18598912	glycerol-3-phosphate	dehydrogenase	[NAD(+)]	GPDHC1%2C	cytosolic
AT5G24520.1	XP_007039213.2	79.71	99	0	546	NC_030852.1	30429844	30430875	LOC18605867	protein	TRANSPARENT	TESTA	GLABRA	1
AT5G24520.1	XP_007039212.2	79.71	99	0	546	NC_030852.1	30429844	30430875	LOC18605867	protein	TRANSPARENT	TESTA	GLABRA	1
AT3G63410.1	XP_007034910.2	79.71	99	0	536	NC_030853.1	28387497	28388056	LOC18603086	2-methyl-6-phytyl-1%2C4-hydroquinone	methyltransferase%2C	chloroplastic
AT3G57870.1	XP_007017168.2	79.71	86	5.56e-85	246	NC_030857.1	137693	137761	LOC18591151	SUMO-conjugating	enzyme	SCE1	isoform	X1
AT3G55530.1	XP_007009245.1	79.71	99	7.52e-139	392	NC_030859.1	1803190	1803267	LOC18586043	E3	ubiquitin-protein	ligase	SDIR1	isoform	X1
AT2G44070.1	XP_007033340.2	79.692	97	0	554	NC_030853.1	21999225	21999675	LOC18602101	translation	initiation	factor	eIF-2B	subunit	delta	isoform	X1
AT4G39980.1	XP_007039666.1	79.688	85	0	777	NC_030852.1	32020106	32020591	LOC18606149	phospho-2-dehydro-3-deoxyheptonate	aldolase	2%2C	chloroplastic
AT2G02470.1	XP_017979207.1	79.688	99	1.24e-128	364	NC_030855.1	10367748	10367844	LOC18595661	PHD	finger	protein	ALFIN-LIKE	7	isoform	X1
AT2G02470.1	XP_007023782.1	79.688	99	1.24e-128	364	NC_030855.1	10367748	10367844	LOC18595661	PHD	finger	protein	ALFIN-LIKE	7	isoform	X1
AT5G20720.1	XP_007012580.1	79.688	99	1.2e-144	405	NC_030858.1	3759052	3759234	LOC18588239	20	kDa	chaperonin%2C	chloroplastic
AT2G40890.1	XP_007028257.2	79.684	99	0	873	NC_030854.1	18823045	18823531	LOC18598608	cytochrome	P450	98A2
AT1G04010.1	XP_007050210.2	79.672	95	0	1041	NC_030850.1	26760784	26761017	LOC18613090	phospholipid--sterol	O-acyltransferase	isoform	X1
AT1G04010.1	XP_017985169.1	79.672	95	0	1041	NC_030850.1	26760784	26761017	LOC18613090	phospholipid--sterol	O-acyltransferase	isoform	X1
AT1G04010.1	XP_017985162.1	79.672	95	0	1041	NC_030850.1	26760784	26761017	LOC18613090	phospholipid--sterol	O-acyltransferase	isoform	X1
AT4G21790.1	XP_007026037.1	79.649	97	8.78e-167	464	NC_030855.1	25182168	25182326	LOC18597126	tobamovirus	multiplication	protein	1
AT3G55530.1	XP_017984742.1	79.646	81	6.86e-117	334	NC_030859.1	1802708	1802746	LOC18586043	E3	ubiquitin-protein	ligase	SDIR1	isoform	X3
AT2G27460.1	XP_017983701.1	79.639	99	0	1280	NC_030858.1	34035223	34035550	LOC18590307	protein	transport	protein	SEC23	isoform	X1
AT1G51590.1	XP_017979190.1	79.636	97	0	911	NC_030855.1	7674202	7674360	LOC18595629	mannosyl-oligosaccharide	1%2C2-alpha-mannosidase	MNS1
AT2G02470.1	XP_017979208.1	79.608	99	9.58e-128	362	NC_030855.1	10367748	10367844	LOC18595661	PHD	finger	protein	ALFIN-LIKE	7	isoform	X2
AT3G59660.1	XP_017975763.1	79.604	85	0	865	NC_030853.1	23819780	23819830	LOC18602352	BAG-associated	GRAM	protein	1	isoform	X2
AT4G01800.2	XP_017978238.1	79.602	99	0	1659	NC_030850.1	32652995	32653417	LOC18613810	protein	translocase	subunit	SECA1%2C	chloroplastic
AT5G27470.1	XP_007041452.1	79.601	99	0	762	NC_030851.1	1798949	1799081	LOC18607304	serine--tRNA	ligase
AT1G50900.1	XP_017980596.1	79.592	84	7.9e-88	254	NC_030856.1	2478314	2478574	LOC18593582	protein	LHCP	TRANSLOCATION	DEFECT
AT3G58680.1	XP_007048711.2	79.577	99	2.13e-83	241	NC_030850.1	9032024	9032165	LOC18612065	multiprotein-bridging	factor	1b
AT3G58680.1	XP_017969864.1	79.577	99	2.13e-83	241	NC_030850.1	9032024	9032165	LOC18612065	multiprotein-bridging	factor	1b
AT2G31660.1	XP_017975230.1	79.572	81	0	1424	NC_030853.1	24826208	24826297	LOC18602502	importin	beta-like	SAD2	isoform	X2
AT2G38120.1	XP_007041889.2	79.565	94	0	767	NC_030851.1	3155546	3155701	LOC18607576	auxin	transporter-like	protein	5
AT3G13870.1	XP_007024515.2	79.537	97	0	1283	NC_030855.1	19423855	19423858	LOC18596154	protein	ROOT	HAIR	DEFECTIVE	3
AT1G22200.1	XP_017981330.1	79.534	99	0	664	NC_030857.1	5445396	5445537	LOC18592184	endoplasmic	reticulum-Golgi	intermediate	compartment	protein	3
AT1G06570.1	XP_017975127.1	79.529	95	0	698	NC_030850.1	10442691	10443823	LOC18612224	4-hydroxyphenylpyruvate	dioxygenase
AT4G30600.1	XP_007011907.2	79.528	99	0	927	NC_030858.1	1475397	1476361	LOC18587828	signal	recognition	particle	receptor	subunit	alpha
AT2G26930.1	XP_017983997.1	79.518	86	0	553	NC_030858.1	31277883	31278023	LOC18590007	4-diphosphocytidyl-2-C-methyl-D-erythritol	kinase%2C	chloroplastic/chromoplastic	isoform	X1
AT5G63680.1	XP_007014033.2	79.513	96	0	815	NC_030858.1	22020626	22020874	LOC18589131	pyruvate	kinase%2C	cytosolic	isozyme
AT5G65730.1	XP_007047639.2	79.496	95	1.41e-176	488	NC_030850.1	3927659	3927839	LOC18611357	probable	xyloglucan	endotransglucosylase/hydrolase	protein	6
AT5G45600.1	XP_017970088.1	79.487	87	2.43e-146	409	NC_030851.1	3544630	3544659	LOC18607666	transcription	initiation	factor	TFIID	subunit	14b	isoform	X1
AT5G41650.1	XP_017970678.1	79.487	99	1.87e-69	203	NC_030851.1	750477	750830	LOC18607090	uncharacterized	protein	LOC18607090
AT5G19660.1	XP_007013163.1	79.487	93	0	1632	NC_030858.1	5751041	5751586	LOC18588592	subtilisin-like	protease	SBT6.1
AT5G23120.2	XP_007043300.1	79.469	95	0	644	NC_030851.1	8527686	8528040	LOC18608506	photosystem	II	stability/assembly	factor	HCF136%2C	chloroplastic
AT5G23120.2	XP_017971278.1	79.469	95	0	644	NC_030851.1	8527686	8528040	LOC18608506	photosystem	II	stability/assembly	factor	HCF136%2C	chloroplastic
AT1G58290.1	XP_017981639.1	79.459	99	0	839	NC_030857.1	3733866	3734148	LOC18591872	glutamyl-tRNA	reductase	1%2C	chloroplastic
AT3G21690.1	XP_007045633.2	79.441	99	0	773	NC_030851.1	38458025	38458342	LOC18610092	protein	DETOXIFICATION	40
AT5G61970.1	XP_007038129.2	79.436	99	0	993	NC_030852.1	26528136	26528226	LOC18605197	signal	recognition	particle	subunit	SRP68
AT5G61970.1	XP_017973260.1	79.436	99	0	993	NC_030852.1	26528136	26528226	LOC18605197	signal	recognition	particle	subunit	SRP68
AT5G09650.1	XP_007041472.1	79.433	93	7.66e-163	456	NC_030851.1	1898802	1899149	LOC18607319	soluble	inorganic	pyrophosphatase	6%2C	chloroplastic
AT5G47420.1	XP_007039786.1	79.433	99	4.34e-168	466	NC_030852.1	32510103	32510150	LOC18606231	uncharacterized	protein	LOC18606231
AT5G45930.1	XP_007025454.2	79.433	99	0	667	NC_030855.1	23284905	23285007	LOC18596739	magnesium-chelatase	subunit	ChlI%2C	chloroplastic
AT5G57330.1	XP_007014307.2	79.421	99	0	533	NC_030858.1	14487839	14487931	LOC18589327	putative	glucose-6-phosphate	1-epimerase
AT5G57330.1	XP_017982462.1	79.421	99	0	533	NC_030858.1	14487839	14487931	LOC18589327	putative	glucose-6-phosphate	1-epimerase
AT5G57330.1	XP_017982461.1	79.421	99	0	533	NC_030858.1	14487839	14487931	LOC18589327	putative	glucose-6-phosphate	1-epimerase
AT5G16150.1	XP_007033227.2	79.417	99	0	842	NC_030853.1	21233500	21233758	LOC18602025	plastidic	glucose	transporter	4	isoform	X2
AT5G18600.1	XP_007035505.1	79.412	99	5.58e-58	173	NC_030853.1	30365621	30365929	LOC18603452	monothiol	glutaredoxin-S2
AT2G39730.1	XP_017976262.1	79.412	99	0	788	NC_030854.1	1555620	1556242	LOC108661879	ribulose	bisphosphate	carboxylase/oxygenase	activase	2%2C	chloroplastic-like
AT3G02780.1	XP_007029312.2	79.401	92	1.99e-151	425	NC_030854.1	30270045	30270307	LOC18599322	isopentenyl-diphosphate	Delta-isomerase	I
AT1G18540.1	XP_017976180.1	79.399	99	8.12e-124	350	NC_030854.1	28707657	28707913	LOC18599116	60S	ribosomal	protein	6
AT5G43370.1	XP_007035103.2	79.383	99	0	854	NC_030853.1	29107918	29109531	LOC18603211	inorganic	phosphate	transporter	2025-04-01
AT5G43370.1	XP_007035101.2	79.383	99	0	854	NC_030853.1	29107918	29109531	LOC18603211	inorganic	phosphate	transporter	2025-04-01
AT4G24550.2	XP_017981707.1	79.379	99	0	748	NC_030857.1	1412333	1412390	LOC18591439	AP-4	complex	subunit	mu	isoform	X1
AT5G04130.1	XP_017977077.1	79.372	99	0	1145	NC_030854.1	21624087	21624217	LOC18598680	DNA	gyrase	subunit	B%2C	chloroplastic/mitochondrial
AT4G32880.1	XP_017979082.1	79.352	99	0	1377	NC_030855.1	18018626	18018834	LOC18596004	homeobox-leucine	zipper	protein	ATHB-15
AT5G49500.1	XP_017978974.1	79.352	99	0	811	NC_030855.1	2577175	2577405	LOC18595318	signal	recognition	particle	54	kDa	protein	2
AT4G29480.1	XP_017982696.1	79.339	98	2.46e-71	209	NC_030858.1	2616670	2616857	LOC18588041	uncharacterized	protein	LOC18588041
AT5G08500.1	XP_007048636.1	79.329	95	0	941	NC_030850.1	8568714	8568911	LOC18612014	CLPTM1-like	membrane	protein	cnrB
AT2G05990.1	XP_007014837.1	79.328	99	0	610	NC_030858.1	26724674	26724950	LOC18589696	enoyl-[acyl-carrier-protein]	reductase	[NADH]%2C	chloroplastic
AT4G01480.1	XP_017977651.1	79.327	96	1.3e-125	353	NC_030854.1	2072758	2072893	LOC18597812	soluble	inorganic	pyrophosphatase	4
AT1G01090.1	XP_017969613.1	79.31	99	0	702	NC_030850.1	33104051	33104554	LOC18613891	pyruvate	dehydrogenase	E1	component	subunit	alpha-3%2C	chloroplastic
AT1G67350.1	XP_007044053.1	79.31	88	6.38e-51	155	NC_030851.1	17466395	17466673	LOC18609026	uncharacterized	protein	LOC18609026
AT5G54110.1	XP_007025816.1	79.31	76	5.05e-112	323	NC_030855.1	24471852	24472113	LOC18596972	vesicle-associated	protein	2025-02-04
AT1G64060.1	XP_007040366.2	79.303	99	0	1553	NC_030852.1	34554535	34555144	LOC18606602	respiratory	burst	oxidase	homolog	protein	A
AT1G80100.3	XP_007023197.2	79.286	87	2.14e-68	204	NC_030855.1	2179088	2179156	LOC18595267	pseudo	histidine-containing	phosphotransfer	protein	6
AT2G24200.1	XP_007011931.2	79.278	99	0	828	NC_030858.1	1539497	1539724	LOC18587844	leucine	aminopeptidase	1
AT5G16150.1	XP_017975387.1	79.273	99	0	843	NC_030853.1	21233500	21233758	LOC18602025	plastidic	glucose	transporter	4	isoform	X1
AT2G47470.1	XP_007051067.2	79.272	99	0	577	NC_030850.1	31785117	31785268	LOC18613666	protein	disulfide-isomerase	like	2025-01-02
AT5G02140.1	XP_007026966.2	79.268	82	2.61e-149	421	NC_030854.1	1623520	1623799	LOC18597722	thaumatin-like	protein
AT4G39660.1	XP_007048076.2	79.261	99	0	784	NC_030850.1	5871679	5871954	LOC18611649	alanine--glyoxylate	aminotransferase	2	homolog	1%2C	mitochondrial
AT4G39660.1	XP_007048074.2	79.261	99	0	784	NC_030850.1	5871679	5871954	LOC18611649	alanine--glyoxylate	aminotransferase	2	homolog	1%2C	mitochondrial
AT5G63400.1	XP_017970040.1	79.253	98	1.88e-148	414	NC_030851.1	34612898	34613009	LOC18609710	adenylate	kinase	4
AT2G32950.1	XP_007049188.2	79.251	99	0	1128	NC_030850.1	12070227	12070550	LOC18612361	E3	ubiquitin-protein	ligase	COP1	isoform	X1
AT4G23000.1	XP_017981597.1	79.249	98	0	1485	NC_030857.1	544027	544325	LOC18591250	uncharacterized	protein	LOC18591250
AT4G23000.1	XP_007017323.1	79.249	98	0	1485	NC_030857.1	544027	544325	LOC18591250	uncharacterized	protein	LOC18591250
AT1G60710.1	XP_007034105.2	79.228	97	0	569	NC_030853.1	25315745	25316164	LOC18602572	probable	aldo-keto	reductase	2	isoform	X2
AT5G54510.1	XP_017970114.1	79.221	99	0	1027	NC_030851.1	9182646	9182986	LOC18608563	indole-3-acetic	acid-amido	synthetase	GH3.6
AT1G22800.1	XP_017981263.1	79.217	93	0	540	NC_030857.1	14674843	14675028	LOC18592851	putative	methyltransferase	At1g22800	isoform	X2
AT1G22800.1	XP_007019829.2	79.217	93	0	540	NC_030857.1	14674687	14674718	LOC18592851	putative	methyltransferase	At1g22800	isoform	X1
AT4G34230.1	XP_007042532.2	79.213	99	0	514	NC_030851.1	5458886	5458974	LOC18608008	cinnamyl	alcohol	dehydrogenase	1
AT3G17810.1	XP_017973575.1	79.206	99	0	709	NC_030852.1	7669468	7669746	LOC18604415	dihydropyrimidine	dehydrogenase	(NADP(+))%2C	chloroplastic
AT4G37040.1	XP_007047220.1	79.202	99	0	574	NC_030850.1	2530476	2530581	LOC18611107	methionine	aminopeptidase	1D%2C	chloroplastic/mitochondrial	isoform	X1
AT5G43780.1	XP_007034900.2	79.195	95	0	736	NC_030853.1	28353804	28354309	LOC18603080	ATP	sulfurylase	1%2C	chloroplastic
AT1G48410.2	XP_007037089.2	79.178	99	0	1634	NC_030852.1	19098315	19098989	LOC18604506	protein	argonaute	1	isoform	X1
AT1G48410.2	XP_007037090.2	79.178	99	0	1634	NC_030852.1	19098315	19098989	LOC18604506	protein	argonaute	1	isoform	X1
AT1G48410.2	XP_017973359.1	79.178	99	0	1634	NC_030852.1	19098315	19098989	LOC18604506	protein	argonaute	1	isoform	X1
AT5G41260.1	XP_017973709.1	79.175	99	0	821	NC_030852.1	34085593	34085674	LOC18606516	probable	serine/threonine-protein	kinase	At5g41260
AT5G41260.1	XP_017973708.1	79.175	99	0	821	NC_030852.1	34085593	34085674	LOC18606516	probable	serine/threonine-protein	kinase	At5g41260
AT5G41260.1	XP_017973706.1	79.175	99	0	821	NC_030852.1	34085593	34085674	LOC18606516	probable	serine/threonine-protein	kinase	At5g41260
AT5G41260.1	XP_007040221.2	79.175	99	0	821	NC_030852.1	34085593	34085674	LOC18606516	probable	serine/threonine-protein	kinase	At5g41260
AT5G41260.1	XP_007040220.2	79.175	99	0	821	NC_030852.1	34085593	34085674	LOC18606516	probable	serine/threonine-protein	kinase	At5g41260
AT3G57130.1	XP_007028566.1	79.175	99	0	734	NC_030854.1	24568883	24569356	LOC18598813	regulatory	protein	NPR5
AT2G30630.2	XP_017971308.1	79.167	95	0	825	NC_030850.1	28532468	28532477	LOC18613213	uncharacterized	protein	LOC18613213
AT1G76690.1	XP_017979481.1	79.167	96	0	629	NC_030855.1	4207214	4207542	LOC18595445	putative	12-oxophytodienoate	reductase	11
AT5G64740.1	XP_017981277.1	79.159	99	0	1751	NC_030857.1	15838474	15838554	LOC18592649	cellulose	synthase	A	catalytic	subunit	5	[UDP-forming]
AT5G45600.1	XP_007041994.2	79.149	87	4.53e-146	409	NC_030851.1	3544630	3544659	LOC18607666	transcription	initiation	factor	TFIID	subunit	14b	isoform	X2
AT4G39850.3	XP_017982502.1	79.145	99	0	2164	NC_030850.1	5363078	5363139	LOC18611577	ABC	transporter	D	family	member	1
AT4G39850.3	XP_017982497.1	79.145	99	0	2164	NC_030850.1	5363078	5363139	LOC18611577	ABC	transporter	D	family	member	1
AT2G19520.1	XP_017977981.1	79.14	88	0	779	NC_030855.1	19252104	19252348	LOC18596136	WD-40	repeat-containing	protein	MSI4	isoform	X1
AT5G60660.1	XP_007041804.1	79.137	95	8.21e-158	441	NC_030851.1	2903713	2903992	LOC18607531	probable	aquaporin	PIP2-8
AT5G13490.1	XP_007014995.1	79.135	99	0	607	NC_030858.1	28697312	28697818	LOC18589798	ADP%2CATP	carrier	protein	1%2C	mitochondrial
AT5G13490.1	XP_017983391.1	79.135	99	0	607	NC_030858.1	28697312	28697818	LOC18589798	ADP%2CATP	carrier	protein	1%2C	mitochondrial
AT5G45380.1	XP_017972794.1	79.128	91	0	1003	NC_030852.1	36286410	36286424	LOC18606959	urea-proton	symporter	DUR3	isoform	X2
AT5G14200.1	XP_007023350.1	79.126	99	0	653	NC_030855.1	3145237	3145456	LOC18595372	3-isopropylmalate	dehydrogenase%2C	chloroplastic
AT5G20950.3	XP_007015579.2	79.126	88	0	1048	NC_030858.1	32555196	32555415	LOC18590154	beta-glucosidase	BoGH3B
AT5G20950.3	XP_007015580.2	79.126	88	0	1048	NC_030858.1	32555196	32555415	LOC18590154	beta-glucosidase	BoGH3B
AT3G03000.1	XP_007040677.1	79.114	94	6.45e-81	236	NC_030852.1	35506229	35506720	LOC18606807	probable	calcium-binding	protein	CML11
AT1G79440.1	XP_017980046.1	79.102	97	0	831	NC_030856.1	21036715	21036795	LOC18594997	succinate-semialdehyde	dehydrogenase%2C	mitochondrial
AT1G79440.1	XP_017980045.1	79.102	97	0	831	NC_030856.1	21036715	21036795	LOC18594997	succinate-semialdehyde	dehydrogenase%2C	mitochondrial
AT1G60970.1	XP_007025172.1	79.096	99	2.23e-102	291	NC_030855.1	22278840	22278842	LOC18596558	coatomer	subunit	zeta-1
AT5G64290.1	XP_007042895.2	79.094	99	0	850	NC_030851.1	6769736	6770551	LOC18608248	dicarboxylate	transporter	2.1%2C	chloroplastic
AT4G21320.1	XP_007025909.2	79.094	99	7.84e-179	494	NC_030855.1	24799410	24799535	LOC18597035	protein	HEAT-STRESS-ASSOCIATED	32
AT1G48410.2	XP_017973360.1	79.085	99	0	1628	NC_030852.1	19098315	19098989	LOC18604506	protein	argonaute	1	isoform	X2
AT4G30620.1	XP_007011904.2	79.054	80	5.3e-76	226	NC_030858.1	1458949	1459039	LOC18587825	nucleoid-associated	protein	At2g24020%2C	chloroplastic
AT4G23850.1	XP_007040514.2	79.052	98	0	1107	NC_030852.1	35025539	35025690	LOC18606697	long	chain	acyl-CoA	synthetase	4
AT1G68060.1	XP_007045275.1	79.051	97	0	927	NC_030851.1	36582115	36582373	LOC18609881	microtubule-associated	protein	70-2
AT3G51610.1	XP_007033557.1	79.048	91	4.44e-126	355	NC_030853.1	22954478	22954588	LOC18602237	uncharacterized	protein	LOC18602237
AT5G37600.1	XP_017975012.1	79.037	99	0	606	NC_030853.1	27203606	27203859	LOC18602866	glutamine	synthetase	leaf	isozyme%2C	chloroplastic
AT1G09770.1	XP_017976913.1	79.03	97	0	1275	NC_030854.1	36101871	36102047	LOC18600076	cell	division	cycle	5-like	protein
AT5G11670.1	XP_007015739.1	79.029	98	0	947	NC_030855.1	18226299	18226328	LOC18590261	NADP-dependent	malic	enzyme
AT5G65430.3	XP_007018723.1	79.012	93	2.59e-141	397	NC_030857.1	5058966	5059451	LOC18592122	14-3-3-like	protein
AT2G06850.1	XP_017969889.1	79.004	95	9.43e-174	482	NC_030850.1	19737318	19737504	LOC18612885	probable	xyloglucan	endotransglucosylase/hydrolase	protein	B
AT4G21980.2	XP_007039874.1	78.992	86	7.01e-67	198	NC_030852.1	32778274	32778310	LOC18606282	autophagy-related	protein	8f
AT1G59610.1	XP_007019933.2	78.976	98	0	1393	NC_030857.1	15505180	15505332	LOC18592924	dynamin-2A
AT4G01470.1	XP_007016527.2	78.968	99	3.55e-136	383	NC_030858.1	36653384	36653516	LOC18590755	probable	aquaporin	TIP1-2
AT5G43370.1	XP_017977305.1	78.967	99	0	856	NC_030850.1	27471398	27473017	LOC18613151	inorganic	phosphate	transporter	2025-04-01
AT5G43370.1	XP_017977718.1	78.967	99	0	856	NC_030850.1	27471398	27473017	LOC18613151	inorganic	phosphate	transporter	2025-04-01
AT2G36850.1	XP_007037861.2	78.953	99	0	3148	NC_030852.1	25408628	25408841	LOC18605030	callose	synthase	10	isoform	X1
AT1G18370.1	XP_017974089.1	78.953	99	0	1551	NC_030852.1	2838798	2839035	LOC18604180	kinesin-like	protein	NACK1
AT1G18370.1	XP_017974088.1	78.953	99	0	1551	NC_030852.1	2838798	2839035	LOC18604180	kinesin-like	protein	NACK1
AT5G50810.1	XP_017972404.1	78.947	97	6.99e-41	128	NC_030852.1	26283896	26283940	LOC18605167	mitochondrial	import	inner	membrane	translocase	subunit	TIM8
AT5G60920.1	XP_007037617.1	78.947	99	0	770	NC_030852.1	23708231	23708333	LOC18604865	protein	COBRA
AT4G21580.1	XP_017978741.1	78.947	99	0	523	NC_030855.1	24299420	24299671	LOC18596933	quinone	oxidoreductase	PIG3
AT2G26250.1	XP_017983496.1	78.947	99	0	918	NC_030858.1	3346521	3346934	LOC18588179	3-ketoacyl-CoA	synthase	10
AT4G24550.2	XP_017981708.1	78.936	99	0	739	NC_030857.1	1412339	1412390	LOC18591439	AP-4	complex	subunit	mu	isoform	X2
AT1G60710.1	XP_007034107.2	78.932	97	0	570	NC_030853.1	25327628	25328047	LOC18602572	probable	aldo-keto	reductase	2	isoform	X1
AT5G42790.1	XP_017981455.1	78.929	99	8.15e-164	455	NC_030857.1	1279388	1279738	LOC18591414	proteasome	subunit	alpha	type-1-B
AT5G60160.1	XP_007037930.2	78.903	99	0	806	NC_030852.1	25702637	25702718	LOC18605074	probable	aspartyl	aminopeptidase
AT3G55770.7	XP_017971571.1	78.889	95	4.65e-47	151	NC_030850.1	13201882	13202016	LOC108660959	LIM	domain-containing	protein	WLIM2b-like
AT3G55770.7	XP_017971699.1	78.889	95	4.65e-47	151	NC_030850.1	13201882	13202016	LOC108660959	LIM	domain-containing	protein	WLIM2b-like
AT3G55770.7	XP_017971614.1	78.889	95	4.65e-47	151	NC_030850.1	13201882	13202016	LOC108660959	LIM	domain-containing	protein	WLIM2b-like
AT3G55770.7	XP_017971659.1	78.889	95	4.65e-47	151	NC_030850.1	13201882	13202016	LOC108660959	LIM	domain-containing	protein	WLIM2b-like
AT4G39980.1	XP_007042911.2	78.882	92	0	824	NC_030851.1	6895541	6896026	LOC18608260	phospho-2-dehydro-3-deoxyheptonate	aldolase	2%2C	chloroplastic
AT3G23300.1	XP_017974949.1	78.88	99	0	989	NC_030853.1	29238295	29238543	LOC18603231	probable	methyltransferase	PMT3
AT3G23300.1	XP_017974948.1	78.88	99	0	989	NC_030853.1	29238295	29238543	LOC18603231	probable	methyltransferase	PMT3
AT3G23300.1	XP_017974950.1	78.88	99	0	989	NC_030853.1	29238295	29238543	LOC18603231	probable	methyltransferase	PMT3
AT3G54690.1	XP_007050273.2	78.857	99	0	558	NC_030850.1	27065388	27066041	LOC18613126	probable	arabinose	5-phosphate	isomerase
AT1G79600.1	XP_007011449.2	78.855	95	0	1052	NC_030859.1	21789580	21789852	LOC18587550	uncharacterized	aarF	domain-containing	protein	kinase	At1g79600%2C	chloroplastic	isoform	X1
AT1G79600.1	XP_007011450.2	78.855	95	0	1052	NC_030859.1	21789580	21789852	LOC18587550	uncharacterized	aarF	domain-containing	protein	kinase	At1g79600%2C	chloroplastic	isoform	X1
AT1G79600.1	XP_017984672.1	78.855	95	0	1052	NC_030859.1	21789580	21789852	LOC18587550	uncharacterized	aarF	domain-containing	protein	kinase	At1g79600%2C	chloroplastic	isoform	X1
AT1G79600.1	XP_017984671.1	78.855	95	0	1052	NC_030859.1	21789580	21789852	LOC18587550	uncharacterized	aarF	domain-containing	protein	kinase	At1g79600%2C	chloroplastic	isoform	X1
AT4G30190.2	XP_017973368.1	78.84	99	0	1539	NC_030852.1	16870534	16870587	LOC18604582	ATPase	11%2C	plasma	membrane-type
AT1G56350.1	XP_007031142.2	78.837	89	0	704	NC_030854.1	38811997	38812440	LOC18600566	peptide	chain	release	factor	PrfB2%2C	chloroplastic
AT5G49190.1	XP_017980395.1	78.829	99	0	1352	NC_030850.1	31454704	31454801	LOC18613599	sucrose	synthase	2
AT4G22120.1	XP_007026161.2	78.824	99	0	1225	NC_030855.1	25546326	25546639	LOC18597211	calcium	permeable	stress-gated	cation	channel	1
AT4G22120.1	XP_017978933.1	78.824	99	0	1225	NC_030855.1	25546326	25546639	LOC18597211	calcium	permeable	stress-gated	cation	channel	1
AT5G23630.1	XP_007029274.2	78.811	99	0	1924	NC_030854.1	30126246	30126365	LOC18599300	probable	manganese-transporting	ATPase	PDR2
AT5G51020.1	XP_007038170.2	78.81	99	5.38e-160	445	NC_030852.1	26666521	26666700	LOC18605219	chromophore	lyase	CRL%2C	chloroplastic
AT5G52100.1	XP_017973028.1	78.808	99	1.11e-177	492	NC_030852.1	28358279	28358389	LOC18605500	dihydrodipicolinate	reductase-like	protein	CRR1%2C	chloroplastic
AT5G62790.2	XP_017973693.1	78.8	99	0	780	NC_030852.1	737612	737708	LOC18603909	1-deoxy-D-xylulose	5-phosphate	reductoisomerase%2C	chloroplastic
AT1G77120.1	XP_007019388.2	78.796	99	0	637	NC_030857.1	9615239	9615272	LOC18592534	alcohol	dehydrogenase	class-P
AT1G04920.1	XP_017974718.1	78.791	99	0	1726	NC_030853.1	26041959	26042237	LOC18602682	probable	sucrose-phosphate	synthase	3
AT5G43600.1	XP_007035001.2	78.775	96	0	712	NC_030853.1	28714028	28714231	LOC18603136	ureidoglycolate	hydrolase
AT5G52920.1	XP_017973441.1	78.769	81	0	790	NC_030852.1	31617829	31618050	LOC18606085	pyruvate	kinase	isozyme	G%2C	chloroplastic
AT5G22060.1	XP_007015641.2	78.759	99	0	642	NC_030858.1	32825250	32825399	LOC18590190	dnaJ	protein	homolog
AT4G13510.1	XP_017975458.1	78.745	98	0	792	NC_030853.1	29817825	29819291	LOC18603350	ammonium	transporter	1	member	1
AT1G76490.1	XP_007018657.2	78.743	84	0	874	NC_030857.1	4859033	4859967	LOC18592079	3-hydroxy-3-methylglutaryl-coenzyme	A	reductase	1
AT3G07230.1	XP_017976809.1	78.723	98	3.47e-20	73.9	NC_030854.1	34747893	34748036	LOC18599876	wound-induced	basic	protein
AT1G05350.1	XP_007037983.2	78.719	99	0	690	NC_030852.1	25911846	25911935	LOC18605105	ubiquitin-like	modifier-activating	enzyme	5	isoform	X1
AT4G02500.1	XP_007035584.2	78.714	97	0	735	NC_030853.1	30582910	30584235	LOC18603502	xyloglucan	6-xylosyltransferase	2
AT1G49820.1	XP_017971154.1	78.708	99	0	690	NC_030851.1	5520366	5520551	LOC18608022	methylthioribose	kinase
AT5G55160.2	XP_007049172.2	78.704	91	1.13e-52	160	NC_030850.1	11966357	11966434	LOC18612350	small	ubiquitin-related	modifier	1
AT4G34700.1	XP_017970755.1	78.689	98	6.04e-68	200	NC_030851.1	3642420	3642551	LOC18607687	NADH	dehydrogenase	[ubiquinone]	1	beta	subcomplex	subunit	9	isoform	X1
AT2G21620.2	XP_007042165.1	78.689	94	7.52e-98	281	NC_030851.1	4139526	4139757	LOC18607766	universal	stress	protein	PHOS32
AT3G27820.1	XP_007031493.2	78.689	99	0	758	NC_030853.1	677940	678059	LOC18600776	monodehydroascorbate	reductase	4%2C	peroxisomal
AT5G59160.1	XP_017975328.1	78.689	78	2.35e-145	409	NC_030853.1	7721811	7721979	LOC18601297	serine/threonine-protein	phosphatase	PP1	isozyme	1	isoform	X2
AT4G30160.2	XP_007014317.2	78.68	99	0	1551	NC_030858.1	14565998	14566053	LOC18589334	villin-4
AT4G30160.2	XP_017983389.1	78.68	99	0	1551	NC_030858.1	14565998	14566053	LOC18589334	villin-4
AT4G30160.2	XP_017983388.1	78.68	99	0	1551	NC_030858.1	14565998	14566053	LOC18589334	villin-4
AT1G27980.1	XP_007043922.2	78.667	96	0	855	NC_030851.1	15256085	15256293	LOC18608940	sphingosine-1-phosphate	lyase
AT5G20080.1	XP_007013383.1	78.659	99	0	540	NC_030858.1	6632572	6632736	LOC18588726	NADH-cytochrome	b5	reductase-like	protein
AT5G03540.3	XP_017984996.1	78.657	99	0	1059	NC_030859.1	14938042	14938203	LOC18586839	exocyst	complex	component	EXO70A1
AT5G02240.1	XP_007026993.2	78.656	99	2.01e-146	412	NC_030854.1	1707710	1707998	LOC18597740	uncharacterized	protein	At5g02240
AT1G22770.1	XP_017981039.1	78.656	99	0	1786	NC_030857.1	16588880	16588966	LOC18592693	protein	GIGANTEA
AT1G22770.1	XP_017981038.1	78.656	99	0	1786	NC_030857.1	16588880	16588966	LOC18592693	protein	GIGANTEA
AT2G34660.1	XP_007041123.2	78.637	99	0	2601	NC_030851.1	651856	652188	LOC18607077	ABC	transporter	C	family	member	2
AT4G11010.1	XP_017973565.1	78.632	98	1.69e-130	376	NC_030852.1	35074299	35074423	LOC18606710	uncharacterized	protein	LOC18606710
AT5G63860.1	XP_017985145.1	78.619	99	0	734	NC_030850.1	7906877	7906973	LOC18611936	ultraviolet-B	receptor	UVR8	isoform	X2
AT5G59420.1	XP_007027003.2	78.619	98	0	783	NC_030854.1	1728627	1728724	LOC18597745	oxysterol-binding	protein-related	protein	3A
AT5G10860.1	XP_017973981.1	78.616	77	4.35e-90	261	NC_030850.1	15352	15609	LOC18610617	CBS	domain-containing	protein	CBSX3%2C	mitochondrial	isoform	X2
AT4G39890.1	XP_007052416.1	78.605	99	1.34e-119	338	NC_030850.1	36661713	36661829	LOC18614552	ras-related	protein	RABH1b
AT2G38120.1	XP_007018988.2	78.602	97	0	765	NC_030857.1	6120958	6121113	LOC18592286	auxin	transporter-like	protein	3
AT5G57090.1	XP_017982550.1	78.593	99	0	999	NC_030858.1	17237808	17239044	LOC18589454	auxin	efflux	carrier	component	2	isoform	X1
AT3G51800.2	XP_007026646.2	78.589	99	0	615	NC_030854.1	560283	560373	LOC18597509	ERBB-3	BINDING	PROTEIN	1
AT3G52850.1	XP_007033522.2	78.583	99	0	1031	NC_030853.1	22730753	22731047	LOC18602211	vacuolar-sorting	receptor	1
AT4G35220.1	XP_017971482.1	78.571	91	2.27e-146	410	NC_030851.1	5383425	5383824	LOC18607991	kynurenine	formamidase
AT3G14110.3	XP_007024682.2	78.571	75	1.34e-126	364	NC_030855.1	20278736	20278820	LOC18596256	protein	FLUORESCENT	IN	BLUE	LIGHT%2C	chloroplastic	isoform	X2
AT3G48990.1	XP_017973177.1	78.558	99	0	805	NC_030852.1	34020361	34020561	LOC18606505	oxalate--CoA	ligase
AT2G26890.1	XP_007013272.2	78.555	99	0	3844	NC_030858.1	6135854	6136267	LOC18588653	dnaJ	homolog	subfamily	C	GRV2
AT3G63410.1	XP_007050459.1	78.551	99	0	521	NC_030850.1	28970051	28970613	LOC18613261	2-methyl-6-phytyl-1%2C4-hydroquinone	methyltransferase%2C	chloroplastic
AT5G47730.1	XP_017979287.1	78.545	80	7.1e-163	456	NC_030855.1	26134279	26134281	LOC18597352	phosphatidylinositol/phosphatidylcholine	transfer	protein	SFH9	isoform	X2
AT1G60970.1	XP_007040859.2	78.531	99	1.33e-102	292	NC_030852.1	36048680	36048682	LOC18606909	coatomer	subunit	zeta-1
AT2G32000.1	XP_007034151.2	78.522	99	0	1425	NC_030853.1	25503245	25503271	LOC18602598	DNA	topoisomerase	3-beta	isoform	X1
AT5G24760.1	XP_007029344.1	78.515	99	0	643	NC_030854.1	30446397	30446439	LOC18599349	alcohol	dehydrogenase-like	6
AT3G46210.1	XP_017982057.1	78.512	99	2.55e-147	410	NC_030858.1	2221173	2221278	LOC18587970	exosome	complex	exonuclease	RRP46	homolog
AT3G62270.1	XP_017975551.1	78.511	99	0	1132	NC_030853.1	31606110	31606213	LOC18603732	boron	transporter	1	isoform	X2
AT2G34160.1	XP_007030533.2	78.505	82	2.34e-56	171	NC_030854.1	36653964	36654071	LOC18600161	uncharacterized	protein	At2g34160
AT2G36850.1	XP_017972828.1	78.497	80	0	2506	NC_030852.1	25402719	25402847	LOC18605030	callose	synthase	10	isoform	X3
AT1G80820.1	XP_007023416.2	78.481	95	0	536	NC_030855.1	3780797	3780929	LOC18595421	cinnamoyl-CoA	reductase	1
AT5G45380.1	XP_017972793.1	78.479	99	0	1082	NC_030852.1	36287215	36287391	LOC18606959	urea-proton	symporter	DUR3	isoform	X1
AT5G48800.1	XP_017984539.1	78.458	80	0	777	NC_030850.1	16937211	16938176	LOC18612788	BTB/POZ	domain-containing	protein	At5g48800	isoform	X2
AT3G60190.1	XP_017971816.1	78.457	99	0	1020	NC_030851.1	36589787	36589918	LOC18609882	dynamin-related	protein	1C
AT1G09760.1	XP_007049957.2	78.455	96	2.1e-134	380	NC_030850.1	21113221	21113302	LOC18612908	U2	small	nuclear	ribonucleoprotein	A'
AT4G39680.1	XP_017984998.1	78.431	79	1.08e-18	90.5	NC_030850.1	5743005	5744412	LOC18611632	apoptotic	chromatin	condensation	inducer	in	the	nucleus
AT5G63840.2	XP_007048509.2	78.425	97	0	1541	NC_030850.1	7932647	7934224	LOC18611939	probable	glucan	1%2C3-alpha-glucosidase
AT1G74910.1	XP_017975174.1	78.417	99	0	699	NC_030853.1	9593148	9593208	LOC18601343	mannose-1-phosphate	guanyltransferase	alpha	isoform	X3
AT3G59050.1	XP_007048902.2	78.411	99	0	774	NC_030850.1	10070921	10070960	LOC18612191	probable	polyamine	oxidase	2
AT4G37040.1	XP_017969712.1	78.397	81	1.06e-165	464	NC_030850.1	2530476	2530581	LOC18611107	methionine	aminopeptidase	1D%2C	chloroplastic/mitochondrial	isoform	X5
AT4G37640.1	XP_007018510.2	78.389	99	0	1641	NC_030857.1	4379957	4380133	LOC18591987	calcium-transporting	ATPase	1%2C	chloroplastic
AT3G48000.1	XP_007044551.2	78.378	96	0	867	NC_030851.1	31163888	31163966	LOC18609398	aldehyde	dehydrogenase	family	2	member	B4%2C	mitochondrial
AT4G10320.1	XP_007026516.2	78.374	99	0	1971	NC_030854.1	135876	136409	LOC18597418	isoleucine--tRNA	ligase%2C	cytoplasmic
AT3G62270.1	XP_007035927.2	78.371	99	0	1135	NC_030853.1	31606110	31606213	LOC18603732	probable	boron	transporter	2	isoform	X1
AT3G62270.1	XP_017975549.1	78.371	99	0	1135	NC_030853.1	31606110	31606213	LOC18603732	probable	boron	transporter	2	isoform	X1
AT3G62270.1	XP_017975548.1	78.371	99	0	1135	NC_030853.1	31606110	31606213	LOC18603732	probable	boron	transporter	2	isoform	X1
AT3G62270.1	XP_017975550.1	78.371	99	0	1135	NC_030853.1	31606110	31606213	LOC18603732	probable	boron	transporter	2	isoform	X1
AT1G70610.1	XP_007044792.2	78.37	96	0	1107	NC_030851.1	33085253	33085702	LOC18609555	ABC	transporter	B	family	member	26%2C	chloroplastic
AT2G25810.1	XP_007012110.1	78.367	98	1.36e-130	369	NC_030858.1	2182333	2182459	LOC18587962	aquaporin	TIP4-1
AT3G48990.1	XP_017972959.1	78.363	99	0	833	NC_030852.1	28798855	28799055	LOC18605571	oxalate--CoA	ligase
AT4G11330.1	XP_007040337.2	78.342	99	0	625	NC_030852.1	34434686	34434852	LOC18606582	mitogen-activated	protein	kinase	homolog	MMK2
AT5G03160.1	XP_007027298.2	78.341	90	0	671	NC_030854.1	2732180	2732312	LOC18597931	dnaJ	protein	P58IPK	homolog
AT3G61710.1	XP_007051563.1	78.337	99	0	798	NC_030850.1	33743919	33744069	LOC18613988	beclin-1-like	protein
AT1G80160.3	XP_007023869.1	78.313	79	1.92e-96	278	NC_030855.1	9825516	9825670	LOC18595729	metallothiol	transferase	FosB
AT1G79930.1	XP_007024112.2	78.312	99	0	1361	NC_030855.1	16667725	16668894	LOC18595896	heat	shock	70	kDa	protein	14
AT1G80830.1	XP_017977975.1	78.309	99	0	861	NC_030855.1	3797003	3797116	LOC18595423	metal	transporter	Nramp6
AT1G80830.1	XP_017977974.1	78.309	99	0	861	NC_030855.1	3797003	3797116	LOC18595423	metal	transporter	Nramp6
AT5G54640.1	XP_007016498.1	78.302	81	3.06e-56	172	NC_030858.1	36575116	36575325	LOC18590740	histone	H2A
AT1G79810.1	XP_007024224.2	78.287	98	0	526	NC_030855.1	17791780	17791893	LOC18595973	peroxisome	biogenesis	protein	2	isoform	X2
AT5G57090.1	XP_017982551.1	78.287	99	0	988	NC_030858.1	17237808	17239011	LOC18589454	auxin	efflux	carrier	component	2	isoform	X2
AT5G63860.1	XP_017985140.1	78.271	99	0	729	NC_030850.1	7906877	7906973	LOC18611936	ultraviolet-B	receptor	UVR8	isoform	X1
AT5G06530.1	XP_017977021.1	78.267	99	0	1152	NC_030854.1	10796434	10796815	LOC18598463	ABC	transporter	G	family	member	22	isoform	X2
AT2G38020.1	XP_007048986.2	78.266	99	0	1396	NC_030850.1	10654060	10654842	LOC18612237	protein	VACUOLELESS1
AT5G54640.1	XP_007030982.2	78.261	88	2.04e-58	177	NC_030854.1	38308619	38308813	LOC18600463	probable	histone	H2A.5
AT4G39230.1	XP_007042155.1	78.247	99	0	503	NC_030851.1	4107670	4107852	LOC18607759	isoflavone	reductase	homolog
AT3G19170.1	XP_017971499.1	78.245	98	0	1726	NC_030851.1	4886453	4886744	LOC18607912	presequence	protease	2%2C	chloroplastic/mitochondrial
AT5G42190.1	XP_007046627.1	78.235	99	2.76e-87	252	NC_030850.1	621833	622129	LOC18610726	SKP1-like	protein	1B
AT1G48420.1	XP_017973547.1	78.226	93	0	632	NC_030852.1	20068953	20069198	LOC18604491	bifunctional	D-cysteine	desulfhydrase/1-aminocyclopropane-1-carboxylate	deaminase%2C	mitochondrial	isoform	X1
AT5G03760.1	XP_007010197.2	78.22	99	0	884	NC_030859.1	7412931	7413266	LOC18586643	glucomannan	4-beta-mannosyltransferase	9
AT3G47520.1	XP_017973150.1	78.218	98	0	613	NC_030852.1	21781567	21782805	LOC18604702	malate	dehydrogenase%2C	chloroplastic	isoform	X2
AT3G47520.1	XP_017973149.1	78.218	98	0	614	NC_030852.1	21784905	21784935	LOC18604702	malate	dehydrogenase%2C	chloroplastic	isoform	X1
AT2G35120.1	XP_007041092.2	78.205	99	7.05e-89	256	NC_030851.1	507786	507864	LOC18607058	glycine	cleavage	system	H	protein	2%2C	mitochondrial
AT3G17410.1	XP_017975211.1	78.202	99	0	559	NC_030853.1	31763213	31763294	LOC18603761	pto-interacting	protein	1	isoform	X1
AT3G17410.1	XP_017975210.1	78.202	99	0	559	NC_030853.1	31763213	31763294	LOC18603761	pto-interacting	protein	1	isoform	X1
AT2G32090.1	XP_007034770.1	78.195	98	3.08e-76	222	NC_030853.1	27967619	27967702	LOC18602998	lactoylglutathione	lyase	isoform	X1
AT4G13430.1	XP_007035280.1	78.193	99	0	845	NC_030853.1	29706122	29706175	LOC18603322	3-isopropylmalate	dehydratase	large	subunit	isoform	X1
AT5G66210.1	XP_017980935.1	78.182	99	0	890	NC_030850.1	812367	812744	LOC18610769	calcium-dependent	protein	kinase	28
AT5G20570.2	XP_017981977.1	78.169	99	2.8e-69	204	NC_030858.1	3934316	3934451	LOC18588272	RING-box	protein	1a
AT5G14680.1	XP_007031491.2	78.161	99	3.23e-106	301	NC_030853.1	664954	665140	LOC18600774	universal	stress	protein	A-like	protein
AT2G42270.1	XP_007010914.2	78.157	99	0	3474	NC_030859.1	18568547	18571498	LOC18587159	DExH-box	ATP-dependent	RNA	helicase	DExH12
AT4G21160.1	XP_017978650.1	78.154	96	0	526	NC_030855.1	293774	293792	LOC18595048	probable	ADP-ribosylation	factor	GTPase-activating	protein	AGD13	isoform	X1
AT4G21160.1	XP_007022879.1	78.154	96	0	526	NC_030855.1	293774	293792	LOC18595048	probable	ADP-ribosylation	factor	GTPase-activating	protein	AGD13	isoform	X1
AT1G12740.2	XP_017972363.1	78.151	99	0	777	NC_030852.1	33791409	33791602	LOC18606461	cytochrome	P450	87A3
AT3G19210.1	XP_007042404.2	78.137	88	0	1319	NC_030851.1	4965118	4965344	LOC18607922	protein	CHROMATIN	REMODELING	25
AT5G27600.1	XP_017974649.1	78.115	89	0	1046	NC_030853.1	27660900	27660952	LOC18602948	long	chain	acyl-CoA	synthetase	6%2C	peroxisomal	isoform	X2
AT1G10670.3	XP_007031235.1	78.104	99	0	716	NC_030854.1	39070048	39070146	LOC18600621	ATP-citrate	synthase	alpha	chain	protein	2
AT5G06460.1	XP_017983162.1	78.102	99	0	1734	NC_030858.1	38095007	38095079	LOC18591005	LOW	QUALITY	PROTEIN:	ubiquitin-activating	enzyme	E1	1
AT4G08790.1	XP_017984109.1	78.102	89	1.27e-164	460	NC_030859.1	3325156	3325371	LOC18586299	nitrilase-like	protein	2
AT5G06300.1	XP_007016779.2	78.095	96	4.38e-114	325	NC_030858.1	37487793	37487924	LOC18590895	cytokinin	riboside	5'-monophosphate	phosphoribohydrolase	LOG1	isoform	X1
AT3G13235.1	XP_017980635.1	78.082	86	0	565	NC_030856.1	403784	403849	LOC18593206	DNA	damage-inducible	protein	1	isoform	X3
AT1G09020.1	XP_017976653.1	78.074	99	0	783	NC_030854.1	38211608	38211732	LOC18600444	sucrose	nonfermenting	4-like	protein
AT3G54660.1	XP_017977572.1	78.07	99	0	904	NC_030850.1	28739900	28740405	LOC18613230	glutathione	reductase%2C	chloroplastic
AT3G59280.1	XP_007038156.1	78.07	97	1.66e-61	183	NC_030852.1	26616712	26616714	LOC18605209	mitochondrial	import	inner	membrane	translocase	subunit	tim16
AT3G25600.1	XP_007037749.1	78.065	96	4.94e-85	246	NC_030852.1	24888295	24888780	LOC18604962	probable	calcium-binding	protein	CML15
AT4G01810.1	XP_007051292.2	78.043	99	0	1415	NC_030850.1	32642241	32642720	LOC18613808	protein	transport	protein	SEC23
AT4G31860.1	XP_017978918.1	78.042	94	0	569	NC_030855.1	4318733	4318849	LOC18595461	probable	protein	phosphatase	2C	21
AT4G31860.1	XP_007023472.1	78.042	94	0	569	NC_030855.1	4318733	4318849	LOC18595461	probable	protein	phosphatase	2C	21
AT3G15290.1	XP_007021538.2	78.041	99	6.67e-171	474	NC_030856.1	5631811	5631996	LOC18594035	3-hydroxybutyryl-CoA	dehydrogenase
AT3G61050.1	XP_007052003.2	78.039	99	0	761	NC_030850.1	35176966	35177070	LOC18614265	synaptotagmin-4
AT2G16950.1	XP_007041753.2	78.038	99	0	1407	NC_030851.1	2749830	2750018	LOC18607499	transportin-1
AT1G69040.2	XP_017971810.1	78.022	99	0	730	NC_030851.1	39071116	39071119	LOC18610183	ACT	domain-containing	protein	ACR4
AT3G06550.2	XP_017975427.1	78.022	96	0	884	NC_030853.1	31416743	31416775	LOC18603697	protein	REDUCED	WALL	ACETYLATION	2	isoform	X1
AT3G06550.2	XP_007035864.2	78.022	96	0	884	NC_030853.1	31416743	31416775	LOC18603697	protein	REDUCED	WALL	ACETYLATION	2	isoform	X1
AT4G09140.1	XP_017981755.1	78.02	81	0	961	NC_030857.1	17647292	17647519	LOC18593050	DNA	mismatch	repair	protein	MLH1	isoform	X2
AT5G02260.1	XP_007027012.2	78	97	1.43e-150	420	NC_030854.1	1754902	1755067	LOC18597750	expansin-A6
AT4G34890.1	XP_007015018.2	78	99	0	2200	NC_030858.1	28977698	28977833	LOC18589817	xanthine	dehydrogenase	1	isoform	X1
AT3G03100.1	XP_007015544.1	77.987	99	3.31e-94	270	NC_030858.1	32418559	32418650	LOC18590136	probable	NADH	dehydrogenase	[ubiquinone]	1	alpha	subcomplex	subunit	12
AT2G44180.1	XP_017969509.1	77.982	98	0	679	NC_030850.1	11292706	11292859	LOC18612294	methionine	aminopeptidase	2B
AT3G12670.1	XP_007040954.2	77.98	99	0	966	NC_030851.1	8476	8602	LOC18606987	CTP	synthase
AT3G12670.1	XP_007040953.2	77.98	99	0	966	NC_030851.1	8476	8602	LOC18606987	CTP	synthase
AT3G10390.3	XP_017984999.1	77.976	88	0	1300	NC_030859.1	4742379	4744149	LOC18586488	protein	FLOWERING	LOCUS	D
AT5G62230.1	XP_007038488.2	77.97	99	0	1562	NC_030852.1	27890125	27890242	LOC18605427	LRR	receptor-like	serine/threonine-protein	kinase	ERL1
AT5G57090.1	XP_017982552.1	77.966	99	0	976	NC_030858.1	17237808	17239044	LOC18589454	auxin	efflux	carrier	component	2	isoform	X3
AT2G33700.1	XP_007018092.1	77.953	98	0	601	NC_030857.1	2845340	2845531	LOC18591732	probable	protein	phosphatase	2C	27
AT5G26980.1	XP_007031091.2	77.946	99	0	512	NC_030854.1	38708913	38709127	LOC18600540	syntaxin-43
AT1G20510.1	XP_007017972.2	77.941	99	0	877	NC_030857.1	2514387	2515605	LOC18591666	4-coumarate--CoA	ligase-like	5	isoform	X1
AT1G74850.1	XP_007036055.2	77.939	87	0	1234	NC_030852.1	142997	144816	LOC18603804	pentatricopeptide	repeat-containing	protein	At1g74850%2C	chloroplastic	isoform	X2
AT5G41260.1	XP_017984665.1	77.938	99	0	806	NC_030850.1	34639235	34639316	LOC18614153	probable	serine/threonine-protein	kinase	At5g41260
AT1G63940.2	XP_017973572.1	77.935	99	0	768	NC_030852.1	34463297	34463306	LOC18606587	monodehydroascorbate	reductase	5%2C	mitochondrial
AT5G14640.1	XP_017981223.1	77.913	98	0	678	NC_030850.1	34872100	34872153	LOC18614206	shaggy-related	protein	kinase	epsilon	isoform	X2
AT2G18250.1	XP_017973434.1	77.907	95	3.31e-97	278	NC_030852.1	589003	589122	LOC18603886	phosphopantetheine	adenylyltransferase
AT2G18250.1	XP_017973435.1	77.907	95	3.31e-97	278	NC_030852.1	589003	589122	LOC18603886	phosphopantetheine	adenylyltransferase
AT2G18250.1	XP_017973436.1	77.907	95	3.31e-97	278	NC_030852.1	589003	589122	LOC18603886	phosphopantetheine	adenylyltransferase
AT2G18250.1	XP_017973437.1	77.907	95	3.31e-97	278	NC_030852.1	589003	589122	LOC18603886	phosphopantetheine	adenylyltransferase
AT3G02870.1	XP_007026279.2	77.903	98	1.83e-161	449	NC_030855.1	25848530	25848542	LOC18597288	inositol	monophosphatase	3
AT1G72330.3	XP_017978937.1	77.897	99	0	878	NC_030855.1	20653072	20653281	LOC18596312	alanine	aminotransferase	2%2C	mitochondrial
AT4G12110.1	XP_007039995.2	77.891	98	0	502	NC_030852.1	33291520	33291849	LOC18606367	methylsterol	monooxygenase	2025-01-01
AT2G41680.1	XP_017977153.1	77.883	99	0	830	NC_030854.1	26226226	26226436	LOC18598885	thioredoxin	reductase	NTRC	isoform	X1
AT5G44110.1	XP_017981909.1	77.855	99	5.54e-168	467	NC_030850.1	26947728	26947902	LOC18613115	ABC	transporter	I	family	member	21
AT1G73650.3	XP_007036783.1	77.855	95	1.3e-167	466	NC_030852.1	5100232	5100282	LOC18604316	uncharacterized	protein	LOC18604316	isoform	X2
[truncated: 4,665 more rows]

## Sheet: Table S4
	Table S4 DRAGO-based functional domain annotation of T. cacao proteins with functional annotation inferred from BLASTp against Arabidopsis thaliana
[truncated: 2,026 more rows]

[truncated: 6 more sheets: Table S5, Table S6, Table S7, Table S8, Table S9, Table S10]
