# Supplementary material
Source: Research Square preprint supplement (doi:10.21203/rs.3.rs-9441324/v1)
Supplement: Supplementary file 2 [file fc6d090d9b560dd21e653871.xlsx]

## Sheet: Supplementary Information
SNP-based genomic variation in candidate disease resistance genes of Theobroma cacao
Molecular Breeding
Gabriela Nicolle Ramos-Lizardo¹*, Konstantinos G. Alexiou², Jonathan Javier Mucherino-Muñoz³, María José Aranzana² & Ronan Xavier Corrêa¹˒⁴*
¹ Center for Biotechnology and Genetics, Universidade Estadual de Santa Cruz (UESC), Ilhéus 45662-900, Brazil
² Center for Research in Agricultural Genomics, UAB Campus, 08193 Cerdanyola del Vallès, Barcelona, Spain
³ Institute of Biodiversity and Sustainability (NUPEM), Federal University of Rio de Janeiro (UFRJ), Macaé, Rio de Janeiro, Brazil
⁴ Department of Biological Sciences, State University of Santa Cruz, Ilhéus, Bahia, 45662-900, Brazil
Corresponding authors:
Ronan Xavier Corrêa — ronanxc@uesc.br (ORCID: 0000-0002-4010-1565)
Gabriela Nicolle Ramos-Lizardo — nicolleramos94@gmail.com (ORCID: 0000-0003-2085-2836)
List of Supplementary Tables
Table S11. Tajima’s D and nucleotide diversity (π) estimates for 1-kb coding-region windows in T. cacao, and inferred selection categories
Table S12. Chromosome-wise distribution and enrichment analysis of atypical coding-region windows identified by Tajima’s D in T. cacao
Table S13. Atypical Tajima’s D windows in coding regions of chromosomes 6 and 7 of T. cacao, corresponding to statistically significant hotspots with intermediate allele frequencies
Table S14. Enriched Gene Ontology (GO) biological process terms for candidate resistance genes harboring SNPs in coding regions of T. cacao
Table S15. Enriched KEGG pathways associated with candidate resistance genes harboring coding-region SNPs in T. cacao
Table S16. Proteins harboring high-impact coding variants in genomic regions under different selection regimes with intermediate allele frequencies in T. cacao
Table S17. Single nucleotide polymorphisms (SNPs) identified in genes colocalized with quantitative trait loci (QTLs) associated with resistance to Phytophthora spp. and witches’ broom disease in T. cacao.

## Sheet: Table S11
	Table S11 Tajima’s D and nucleotide diversity (π) estimates for 1-kb coding-region windows in T. cacao, and inferred selection categories
Chromosome	Window start (bp)	Window end (bp)	Number of SNPs in Tajima’s D	Tajima’s D	Nucleotide diversity (π)	Number of SNPs in π	Selection category
NC_030850.1	62000	63000	3	-1.21267	3.22e-05	3	Positive selection (D < 5th percentile)
NC_030850.1	148000	149000	4	-1.39986	3.74e-05	4	Positive selection (D < 5th percentile)
NC_030850.1	135000	136000	1	0.0481946	4.54e-05	1	Neutral
NC_030850.1	134000	135000	1	0.0165309	4.72e-05	1	Neutral
NC_030850.1	405000	406000	4	-1.22156	5.46e-05	4	Positive selection (D < 5th percentile)
NC_030850.1	317000	318000	1	-0.00599723	5.77e-05	1	Neutral
NC_030850.1	422000	423000	4	-1.11738	6.07e-05	4	Neutral
NC_030850.1	424000	425000	1	0.644099	8.17e-05	1	Neutral
NC_030850.1	199000	200000	4	-1.00817	9.54e-05	4	Neutral
NC_030850.1	155000	156000	2	0.381652	0.000128	2	Neutral
NC_030850.1	15000	16000	2	0.276341	0.000133	2	Neutral
NC_030850.1	341000	342000	8	-1.28234	0.000165	8	Positive selection (D < 5th percentile)
NC_030850.1	406000	407000	5	-0.289152	0.000195	5	Neutral
NC_030850.1	423000	424000	9	-1.14335	0.00022	9	Neutral
NC_030850.1	109000	110000	6	-0.528424	0.000257	6	Neutral
NC_030850.1	108000	109000	6	-0.325407	0.000271	6	Neutral
NC_030850.1	357000	358000	2	2.04462	0.000315	2	Balancing selection (D > 95th percentile)
NC_030850.1	342000	343000	10	-0.795504	0.000324	10	Neutral
NC_030850.1	149000	150000	6	0.366598	0.000375	6	Neutral
NC_030850.1	217000	218000	10	-0.124318	0.000489	10	Neutral
NC_030850.1	63000	64000	10	-0.29749	0.00055	10	Neutral
NC_030850.1	213000	214000	27	-0.885301	0.000889	27	Neutral
NC_030850.1	218000	219000	12	1.15035	0.0009	12	Neutral
NC_030851.1	913000	914000	1	-0.759187	1.96e-06	1	Neutral
NC_030851.1	4079000	4080000	1	-0.877369	4.05e-06	1	Neutral
NC_030851.1	22169000	22170000	1	-0.877369	4.05e-06	1	Neutral
NC_030851.1	3609000	3610000	1	-0.881703	4.21e-06	1	Neutral
NC_030851.1	5482000	5483000	1	-0.881703	4.21e-06	1	Neutral
NC_030851.1	30596000	30597000	1	-0.881703	4.21e-06	1	Neutral
NC_030851.1	3512000	3513000	1	-0.883752	4.29e-06	1	Neutral
NC_030851.1	32254000	32255000	1	-0.883752	4.29e-06	1	Neutral
NC_030851.1	32425000	32426000	1	-0.883752	4.29e-06	1	Neutral
NC_030851.1	34433000	34434000	1	-0.883752	4.29e-06	1	Neutral
NC_030851.1	39888000	39889000	1	-0.883752	4.29e-06	1	Neutral
NC_030851.1	3357000	3358000	1	-0.885726	4.37e-06	1	Neutral
NC_030851.1	6564000	6565000	1	-0.885726	4.37e-06	1	Neutral
NC_030851.1	3092000	3093000	1	-0.88763	4.45e-06	1	Neutral
NC_030851.1	7182000	7183000	1	-0.88763	4.45e-06	1	Neutral
NC_030851.1	13544000	13545000	1	-0.88763	4.45e-06	1	Neutral
NC_030851.1	6943000	6944000	1	-0.889469	4.53e-06	1	Neutral
NC_030851.1	4226000	4227000	1	-0.891244	4.61e-06	1	Neutral
NC_030851.1	5713000	5714000	1	-0.891244	4.61e-06	1	Neutral
NC_030851.1	8514000	8515000	1	-0.891244	4.61e-06	1	Neutral
NC_030851.1	2993000	2994000	1	-0.89296	4.69e-06	1	Neutral
NC_030851.1	7650000	7651000	1	-0.89296	4.69e-06	1	Neutral
NC_030851.1	37747000	37748000	1	-0.89296	4.69e-06	1	Neutral
NC_030851.1	7866000	7867000	1	-0.894619	4.77e-06	1	Neutral
NC_030851.1	15970000	15971000	1	-0.894619	4.77e-06	1	Neutral
NC_030851.1	3515000	3516000	1	-0.896224	4.85e-06	1	Neutral
NC_030851.1	5044000	5045000	1	-0.897778	4.93e-06	1	Neutral
NC_030851.1	25279000	25280000	1	-0.912079	5.81e-06	1	Neutral
NC_030851.1	1729000	1730000	2	-1.1646	7.14e-06	2	Positive selection (D < 5th percentile)
NC_030851.1	7579000	7580000	1	-0.744565	7.37e-06	1	Neutral
NC_030851.1	30811000	30812000	1	-0.768017	8.17e-06	1	Neutral
NC_030851.1	6473000	6474000	1	-0.776205	8.49e-06	1	Neutral
NC_030851.1	2087000	2088000	1	-0.780079	8.65e-06	1	Neutral
NC_030851.1	7619000	7620000	1	-0.780079	8.65e-06	1	Neutral
NC_030851.1	3050000	3051000	2	-1.1952	8.66e-06	2	Positive selection (D < 5th percentile)
NC_030851.1	11642000	11643000	2	-1.19432	8.66e-06	2	Positive selection (D < 5th percentile)
NC_030851.1	7805000	7806000	2	-1.19355	8.74e-06	2	Positive selection (D < 5th percentile)
NC_030851.1	6144000	6145000	2	-1.19783	8.82e-06	2	Positive selection (D < 5th percentile)
NC_030851.1	17062000	17063000	2	-1.19783	8.82e-06	2	Positive selection (D < 5th percentile)
NC_030851.1	30810000	30811000	2	-1.19783	8.82e-06	2	Positive selection (D < 5th percentile)
NC_030851.1	7740000	7741000	1	-0.783819	8.82e-06	1	Neutral
NC_030851.1	33929000	33930000	1	-0.787429	8.98e-06	1	Neutral
NC_030851.1	39879000	39880000	1	-0.787429	8.98e-06	1	Neutral
NC_030851.1	3324000	3325000	1	-0.79755	9.46e-06	1	Neutral
NC_030851.1	8206000	8207000	1	-0.79755	9.46e-06	1	Neutral
NC_030851.1	29843000	29844000	1	-0.800706	9.62e-06	1	Neutral
NC_030851.1	38934000	38935000	1	-0.806723	9.94e-06	1	Neutral
NC_030851.1	3514000	3515000	1	-0.809593	1.01e-05	1	Neutral
NC_030851.1	37889000	37890000	1	-0.658665	1.21e-05	1	Neutral
NC_030851.1	2231000	2232000	2	-1.12638	1.31e-05	2	Neutral
NC_030851.1	8316000	8317000	1	-0.687228	1.33e-05	1	Neutral
NC_030851.1	40167000	40168000	1	-0.687228	1.33e-05	1	Neutral
NC_030851.1	8595000	8596000	1	-0.692365	1.36e-05	1	Neutral
NC_030851.1	3124000	3125000	3	-1.41283	1.38e-05	3	Positive selection (D < 5th percentile)
NC_030851.1	13927000	13928000	1	-0.697334	1.38e-05	1	Neutral
NC_030851.1	35919000	35920000	1	-0.52562	1.51e-05	1	Neutral
NC_030851.1	32283000	32284000	2	-1.04574	1.67e-05	2	Neutral
NC_030851.1	6689000	6690000	1	-0.567256	1.67e-05	1	Neutral
NC_030851.1	7655000	7656000	1	-0.567256	1.67e-05	1	Neutral
NC_030851.1	11809000	11810000	1	-0.567256	1.67e-05	1	Neutral
NC_030851.1	3331000	3332000	3	-1.34302	1.69e-05	3	Positive selection (D < 5th percentile)
NC_030851.1	6623000	6624000	2	-1.04857	1.7e-05	2	Neutral
NC_030851.1	4097000	4098000	1	-0.574711	1.7e-05	1	Neutral
NC_030851.1	4527000	4528000	1	-0.574711	1.7e-05	1	Neutral
NC_030851.1	734000	735000	1	-0.581909	1.73e-05	1	Neutral
NC_030851.1	7654000	7655000	1	-0.581909	1.73e-05	1	Neutral
NC_030851.1	7976000	7977000	1	-0.581909	1.73e-05	1	Neutral
NC_030851.1	39892000	39893000	1	-0.581909	1.73e-05	1	Neutral
NC_030851.1	32594000	32595000	2	-1.05983	1.76e-05	2	Neutral
NC_030851.1	6919000	6920000	2	-1.06139	1.78e-05	2	Neutral
NC_030851.1	652000	653000	2	-1.24533	1.8e-05	3	Positive selection (D < 5th percentile)
NC_030851.1	6948000	6949000	3	-1.3625	1.85e-05	3	Positive selection (D < 5th percentile)
NC_030851.1	39609000	39610000	2	-0.961107	1.99e-05	2	Neutral
NC_030851.1	2214000	2215000	1	-0.631672	1.99e-05	1	Neutral
NC_030851.1	4078000	4079000	2	-0.957771	2e-05	2	Neutral
NC_030851.1	2573000	2574000	2	-0.966547	2.02e-05	2	Neutral
NC_030851.1	35841000	35842000	2	-0.968085	2.07e-05	2	Neutral
NC_030851.1	3570000	3571000	3	-1.28249	2.09e-05	3	Positive selection (D < 5th percentile)
NC_030851.1	11400000	11401000	5	-1.67493	2.1e-05	5	Positive selection (D < 5th percentile)
NC_030851.1	7379000	7380000	1	-0.483812	2.14e-05	1	Neutral
NC_030851.1	6589000	6590000	1	-0.492341	2.18e-05	1	Neutral
NC_030851.1	1067000	1068000	2	-0.995128	2.19e-05	2	Neutral
NC_030851.1	6082000	6083000	1	-0.500589	2.22e-05	1	Neutral
NC_030851.1	2224000	2225000	1	-0.516299	2.3e-05	1	Neutral
NC_030851.1	3170000	3171000	1	-0.523785	2.34e-05	1	Neutral
NC_030851.1	5780000	5781000	1	-0.343865	2.36e-05	1	Neutral
NC_030851.1	39607000	39608000	1	-0.366502	2.45e-05	1	Neutral
NC_030851.1	39536000	39537000	2	-1.03417	2.49e-05	2	Neutral
NC_030851.1	4305000	4306000	1	-0.377241	2.5e-05	1	Neutral
NC_030851.1	8353000	8354000	1	-0.377241	2.5e-05	1	Neutral
NC_030851.1	40062000	40063000	2	-0.91784	2.53e-05	2	Neutral
NC_030851.1	3642000	3643000	2	-0.927663	2.6e-05	2	Neutral
NC_030851.1	3822000	3823000	2	-0.827882	2.78e-05	2	Neutral
NC_030851.1	7534000	7535000	3	-1.27167	2.86e-05	3	Positive selection (D < 5th percentile)
NC_030851.1	106000	107000	1	-0.304808	3e-05	1	Neutral
NC_030851.1	10715000	10716000	3	-1.20159	3.1e-05	3	Positive selection (D < 5th percentile)
NC_030851.1	9812000	9813000	1	-0.159741	3.14e-05	1	Neutral
NC_030851.1	38672000	38673000	2	-0.761367	3.15e-05	2	Neutral
NC_030851.1	18952000	18953000	3	-1.20404	3.17e-05	3	Positive selection (D < 5th percentile)
NC_030851.1	13392000	13393000	2	-0.995172	3.18e-05	2	Neutral
NC_030851.1	1356000	1357000	1	-0.347198	3.23e-05	1	Neutral
NC_030851.1	2468000	2469000	1	-0.0322184	3.35e-05	1	Neutral
NC_030851.1	5782000	5783000	1	-0.2138	3.4e-05	1	Neutral
NC_030851.1	4476000	4477000	3	-1.0693	3.64e-05	3	Neutral
NC_030851.1	32284000	32285000	2	-0.834137	3.67e-05	2	Neutral
NC_030851.1	38492000	38493000	2	-0.717695	3.84e-05	2	Neutral
NC_030851.1	6379000	6380000	2	-0.719271	3.89e-05	2	Neutral
NC_030851.1	6163000	6164000	2	-0.533592	3.99e-05	2	Neutral
NC_030851.1	9839000	9840000	3	-0.748342	4.18e-05	4	Neutral
NC_030851.1	32880000	32881000	2	-0.676666	4.18e-05	2	Neutral
NC_030851.1	636000	637000	1	-0.0522242	4.25e-05	1	Neutral
NC_030851.1	38230000	38231000	2	-0.453057	4.5e-05	2	Neutral
NC_030851.1	2186000	2187000	2	-0.59997	4.67e-05	2	Neutral
NC_030851.1	38920000	38921000	2	-0.591372	4.7e-05	2	Neutral
NC_030851.1	11443000	11444000	1	0.0165309	4.72e-05	1	Neutral
NC_030851.1	38516000	38517000	2	-0.599992	4.78e-05	2	Neutral
NC_030851.1	8515000	8516000	3	-0.756008	4.82e-05	3	Neutral
NC_030851.1	2938000	2939000	2	-0.605384	4.82e-05	2	Neutral
NC_030851.1	6143000	6144000	1	0.29215	4.84e-05	1	Neutral
NC_030851.1	33601000	33602000	2	-0.662995	4.92e-05	2	Neutral
NC_030851.1	3168000	3169000	4	-1.21121	4.95e-05	4	Positive selection (D < 5th percentile)
NC_030851.1	4285000	4286000	2	-0.5358	5.03e-05	2	Neutral
NC_030851.1	878000	879000	2	-0.576617	5.07e-05	2	Neutral
NC_030851.1	7806000	7807000	4	-1.13063	5.31e-05	4	Neutral
NC_030851.1	36823000	36824000	3	-0.910886	5.41e-05	3	Neutral
NC_030851.1	2456000	2457000	1	0.0076504	5.67e-05	1	Neutral
NC_030851.1	12810000	12811000	2	-0.647971	5.71e-05	2	Neutral
NC_030851.1	40323000	40324000	7	-1.74166	5.73e-05	7	Positive selection (D < 5th percentile)
NC_030851.1	7878000	7879000	2	-0.423945	5.81e-05	2	Neutral
NC_030851.1	36359000	36360000	1	0.514359	5.9e-05	1	Neutral
NC_030851.1	898000	899000	1	0.491627	6.03e-05	1	Neutral
NC_030851.1	10661000	10662000	1	0.0818769	6.09e-05	1	Neutral
NC_030851.1	32708000	32709000	2	-0.470108	6.19e-05	2	Neutral
NC_030851.1	34561000	34562000	2	-0.233716	6.2e-05	2	Neutral
NC_030851.1	4763000	4764000	2	-0.430329	6.31e-05	2	Neutral
NC_030851.1	39681000	39682000	2	-0.489466	6.35e-05	2	Neutral
NC_030851.1	3434000	3435000	3	-0.64301	6.36e-05	3	Neutral
NC_030851.1	2749000	2750000	2	-0.234679	6.42e-05	2	Neutral
NC_030851.1	5892000	5893000	1	0.294938	6.43e-05	1	Neutral
NC_030851.1	34938000	34939000	6	-1.48464	6.54e-05	6	Positive selection (D < 5th percentile)
NC_030851.1	271000	272000	2	-0.246706	6.56e-05	2	Neutral
NC_030851.1	7547000	7548000	1	0.522542	6.61e-05	1	Neutral
NC_030851.1	504000	505000	1	0.139363	6.62e-05	1	Neutral
NC_030851.1	11735000	11736000	1	0.139363	6.62e-05	1	Neutral
NC_030851.1	4439000	4440000	4	-0.933556	6.68e-05	4	Neutral
NC_030851.1	7150000	7151000	2	-0.339002	6.75e-05	2	Neutral
NC_030851.1	2237000	2238000	4	-1.02278	6.76e-05	4	Neutral
NC_030851.1	36086000	36087000	1	0.479856	6.88e-05	1	Neutral
NC_030851.1	36822000	36823000	4	-0.903656	6.92e-05	4	Neutral
NC_030851.1	12230000	12231000	5	-1.19858	7.17e-05	5	Positive selection (D < 5th percentile)
NC_030851.1	5054000	5055000	1	0.665949	7.23e-05	1	Neutral
NC_030851.1	40107000	40108000	2	-0.324879	7.25e-05	2	Neutral
NC_030851.1	3856000	3857000	3	-0.629566	7.29e-05	3	Neutral
NC_030851.1	36582000	36583000	2	0.0139039	7.46e-05	2	Neutral
NC_030851.1	2455000	2456000	3	-0.512837	7.47e-05	3	Neutral
NC_030851.1	38699000	38700000	3	-0.710433	7.51e-05	3	Neutral
NC_030851.1	34078000	34079000	3	-0.648852	7.6e-05	3	Neutral
NC_030851.1	1725000	1726000	4	-0.989789	7.71e-05	4	Neutral
NC_030851.1	34033000	34034000	2	-0.313275	7.72e-05	2	Neutral
NC_030851.1	15011000	15012000	4	-0.952797	7.8e-05	4	Neutral
NC_030851.1	32544000	32545000	3	-0.634494	7.81e-05	3	Neutral
NC_030851.1	36031000	36032000	1	0.802002	7.83e-05	1	Neutral
NC_030851.1	6180000	6181000	3	-0.818024	7.85e-05	3	Neutral
NC_030851.1	5831000	5832000	2	-0.0359053	7.96e-05	2	Neutral
NC_030851.1	32515000	32516000	2	-0.246221	7.97e-05	2	Neutral
NC_030851.1	39904000	39905000	3	-0.656164	8.01e-05	3	Neutral
NC_030851.1	2584000	2585000	1	0.201109	8.08e-05	1	Neutral
NC_030851.1	602000	603000	2	0.676638	8.2e-05	3	Neutral
NC_030851.1	28504000	28505000	6	-1.28622	8.6e-05	6	Positive selection (D < 5th percentile)
NC_030851.1	7883000	7884000	1	1.53407	8.82e-05	1	Neutral
NC_030851.1	5458000	5459000	1	0.750209	8.99e-05	1	Neutral
NC_030851.1	32940000	32941000	6	-1.17147	9.22e-05	6	Positive selection (D < 5th percentile)
NC_030851.1	34987000	34988000	6	-1.31607	9.25e-05	6	Positive selection (D < 5th percentile)
NC_030851.1	34620000	34621000	1	0.811591	9.31e-05	1	Neutral
NC_030851.1	3169000	3170000	7	-1.47202	9.36e-05	7	Positive selection (D < 5th percentile)
NC_030851.1	3544000	3545000	2	0.2027	9.36e-05	2	Neutral
NC_030851.1	10878000	10879000	1	1.08423	9.38e-05	1	Neutral
NC_030851.1	31977000	31978000	3	-0.612273	9.62e-05	3	Neutral
NC_030851.1	7783000	7784000	1	0.469543	9.62e-05	1	Neutral
NC_030851.1	4399000	4400000	1	0.76763	9.68e-05	1	Neutral
NC_030851.1	2969000	2970000	3	-0.58928	9.69e-05	3	Neutral
NC_030851.1	1773000	1774000	1	0.953126	9.72e-05	1	Neutral
NC_030851.1	40108000	40109000	2	0.191864	9.74e-05	2	Neutral
NC_030851.1	8421000	8422000	2	0.149853	9.75e-05	2	Neutral
NC_030851.1	7772000	7773000	1	0.84881	9.81e-05	1	Neutral
NC_030851.1	3062000	3063000	3	-0.570044	9.89e-05	3	Neutral
NC_030851.1	7661000	7662000	2	0.358475	9.9e-05	2	Neutral
NC_030851.1	2458000	2459000	1	0.929693	9.92e-05	1	Neutral
NC_030851.1	10191000	10192000	2	-0.0972238	9.97e-05	2	Neutral
NC_030851.1	6852000	6853000	5	-0.954178	0.000101	5	Neutral
NC_030851.1	8420000	8421000	3	-0.321429	0.000101	3	Neutral
NC_030851.1	38325000	38326000	2	0.171873	0.000101	2	Neutral
NC_030851.1	887000	888000	2	0.281154	0.000101	2	Neutral
NC_030851.1	5505000	5506000	1	1.0899	0.000101	1	Neutral
NC_030851.1	16211000	16212000	3	-0.549082	0.000103	3	Neutral
NC_030851.1	31558000	31559000	2	-0.305689	0.000103	2	Neutral
NC_030851.1	6900000	6901000	3	-0.247723	0.000103	3	Neutral
NC_030851.1	1613000	1614000	3	-0.100041	0.000103	3	Neutral
NC_030851.1	7678000	7679000	1	0.884299	0.000103	1	Neutral
NC_030851.1	3035000	3036000	1	1.14383	0.000103	1	Neutral
NC_030851.1	31340000	31341000	1	0.685399	0.000104	1	Neutral
NC_030851.1	1712000	1713000	1	1.19609	0.000106	1	Neutral
NC_030851.1	4859000	4860000	4	-0.643805	0.000107	4	Neutral
NC_030851.1	37028000	37029000	4	-0.845614	0.000108	4	Neutral
NC_030851.1	3590000	3591000	2	-0.0300844	0.000108	2	Neutral
NC_030851.1	37336000	37337000	1	1.3932	0.000108	1	Neutral
NC_030851.1	38149000	38150000	4	-0.650606	0.00011	4	Neutral
NC_030851.1	38334000	38335000	4	-0.60497	0.00011	4	Neutral
NC_030851.1	40163000	40164000	4	-0.513185	0.00011	4	Neutral
NC_030851.1	2314000	2315000	3	-0.509008	0.000111	3	Neutral
NC_030851.1	5677000	5678000	1	0.972595	0.000111	1	Neutral
NC_030851.1	7607000	7608000	1	1.48198	0.000112	1	Neutral
NC_030851.1	4520000	4521000	6	-1.27392	0.000113	6	Positive selection (D < 5th percentile)
NC_030851.1	3871000	3872000	1	1.27098	0.000113	1	Neutral
NC_030851.1	4965000	4966000	6	-1.11214	0.000115	6	Neutral
NC_030851.1	38265000	38266000	2	0.275622	0.000115	2	Neutral
NC_030851.1	37821000	37822000	4	-0.592949	0.000116	4	Neutral
NC_030851.1	6181000	6182000	1	1.22281	0.000118	1	Neutral
NC_030851.1	5055000	5056000	1	1.36409	0.000118	1	Neutral
NC_030851.1	38402000	38403000	1	1.91341	0.000118	1	Balancing selection (D > 95th percentile)
NC_030851.1	30424000	30425000	5	-1.00518	0.00012	5	Neutral
NC_030851.1	30304000	30305000	3	-0.43214	0.000121	3	Neutral
NC_030851.1	4247000	4248000	2	0.181541	0.000122	2	Neutral
NC_030851.1	8000	9000	1	0.938839	0.000123	1	Neutral
NC_030851.1	33378000	33379000	2	0.452971	0.000124	2	Neutral
NC_030851.1	4290000	4291000	6	-1.0315	0.000125	6	Neutral
NC_030851.1	23257000	23258000	3	-0.209541	0.000125	3	Neutral
NC_030851.1	2216000	2217000	3	-0.0850379	0.000125	3	Neutral
NC_030851.1	8436000	8437000	6	-1.10013	0.000126	6	Neutral
NC_030851.1	7339000	7340000	4	-0.624038	0.000127	4	Neutral
NC_030851.1	881000	882000	3	0.0356592	0.000129	3	Neutral
NC_030851.1	1650000	1651000	3	0.175723	0.000129	3	Neutral
NC_030851.1	5808000	5809000	2	0.816931	0.00013	2	Neutral
NC_030851.1	39343000	39344000	4	-0.575764	0.000131	4	Neutral
NC_030851.1	30340000	30341000	4	-0.437397	0.000131	4	Neutral
NC_030851.1	38451000	38452000	2	0.550037	0.000131	2	Neutral
NC_030851.1	5685000	5686000	1	1.63941	0.000131	1	Neutral
NC_030851.1	10872000	10873000	5	-0.725898	0.000135	5	Neutral
NC_030851.1	5383000	5384000	4	-0.608611	0.000135	4	Neutral
NC_030851.1	7739000	7740000	1	1.80672	0.000135	1	Balancing selection (D > 95th percentile)
NC_030851.1	40203000	40204000	4	-0.393964	0.000137	4	Neutral
NC_030851.1	1899000	1900000	3	-0.137725	0.000137	3	Neutral
NC_030851.1	7283000	7284000	2	0.651616	0.000137	2	Neutral
NC_030851.1	16201000	16202000	2	0.958993	0.000137	2	Neutral
NC_030851.1	39565000	39566000	4	-0.383143	0.000138	4	Neutral
NC_030851.1	38096000	38097000	7	-1.16251	0.000139	7	Positive selection (D < 5th percentile)
NC_030851.1	38097000	38098000	7	-1.12078	0.000141	7	Neutral
NC_030851.1	18385000	18386000	5	-0.582405	0.000141	5	Neutral
NC_030851.1	5920000	5921000	3	0.220097	0.000142	3	Neutral
NC_030851.1	3611000	3612000	2	0.595394	0.000142	2	Neutral
NC_030851.1	11225000	11226000	1	1.95273	0.000142	1	Balancing selection (D > 95th percentile)
NC_030851.1	36174000	36175000	3	0.044552	0.000143	3	Neutral
NC_030851.1	25282000	25283000	3	0.248463	0.000143	3	Neutral
NC_030851.1	6844000	6845000	2	0.691763	0.000143	2	Neutral
NC_030851.1	2642000	2643000	2	0.836834	0.000143	2	Neutral
NC_030851.1	9860000	9861000	3	-0.305621	0.000144	3	Neutral
NC_030851.1	1803000	1804000	1	1.89626	0.000144	1	Balancing selection (D > 95th percentile)
NC_030851.1	4099000	4100000	4	-0.341838	0.000145	4	Neutral
NC_030851.1	39794000	39795000	5	-0.651399	0.000146	5	Neutral
NC_030851.1	36589000	36590000	1	1.77591	0.000147	1	Balancing selection (D > 95th percentile)
NC_030851.1	29526000	29527000	4	-0.361451	0.000148	4	Neutral
NC_030851.1	5480000	5481000	10	-1.42079	0.000149	10	Positive selection (D < 5th percentile)
NC_030851.1	32941000	32942000	2	0.519349	0.000149	2	Neutral
NC_030851.1	6051000	6052000	3	0.115357	0.00015	3	Neutral
NC_030851.1	5237000	5238000	1	1.73015	0.00015	1	Balancing selection (D > 95th percentile)
NC_030851.1	3137000	3138000	2	0.993268	0.000151	2	Neutral
NC_030851.1	34165000	34166000	3	0.273397	0.000152	3	Neutral
NC_030851.1	38673000	38674000	1	1.97396	0.000153	1	Balancing selection (D > 95th percentile)
NC_030851.1	5520000	5521000	7	-1.00322	0.000154	7	Neutral
NC_030851.1	32305000	32306000	1	1.99261	0.000154	1	Balancing selection (D > 95th percentile)
NC_030851.1	651000	652000	6	-0.618526	0.000156	5	Neutral
NC_030851.1	1619000	1620000	2	0.643959	0.000157	2	Neutral
NC_030851.1	38649000	38650000	2	1.01647	0.000157	2	Neutral
NC_030851.1	3678000	3679000	5	-0.801201	0.000158	5	Neutral
NC_030851.1	38493000	38494000	1	1.74586	0.00016	1	Balancing selection (D > 95th percentile)
NC_030851.1	39751000	39752000	3	0.128838	0.000162	3	Neutral
NC_030851.1	12422000	12423000	3	0.22158	0.000163	3	Neutral
NC_030851.1	9248000	9249000	3	0.243838	0.000163	3	Neutral
NC_030851.1	29638000	29639000	2	0.819599	0.000163	2	Neutral
NC_030851.1	3155000	3156000	1	1.97516	0.000163	1	Balancing selection (D > 95th percentile)
NC_030851.1	1978000	1979000	9	-1.17599	0.000166	9	Positive selection (D < 5th percentile)
NC_030851.1	35260000	35261000	2	0.708556	0.000166	2	Neutral
NC_030851.1	23247000	23248000	3	0.278194	0.00017	3	Neutral
NC_030851.1	30385000	30386000	4	-0.181222	0.000171	4	Neutral
NC_030851.1	34513000	34514000	4	0.020907	0.000173	4	Neutral
NC_030851.1	36992000	36993000	4	0.0493871	0.000176	4	Neutral
NC_030851.1	39806000	39807000	3	0.229157	0.000178	3	Neutral
NC_030851.1	7445000	7446000	2	1.08856	0.000178	2	Neutral
NC_030851.1	39886000	39887000	2	0.745706	0.000179	2	Neutral
NC_030851.1	7371000	7372000	5	-0.819353	0.00018	5	Neutral
NC_030851.1	39439000	39440000	4	-0.109061	0.000182	4	Neutral
NC_030851.1	17457000	17458000	3	0.264239	0.000182	3	Neutral
NC_030851.1	2585000	2586000	5	-0.468752	0.000186	5	Neutral
NC_030851.1	7994000	7995000	2	0.695444	0.000186	2	Neutral
NC_030851.1	39662000	39663000	2	1.12222	0.000186	2	Neutral
NC_030851.1	3625000	3626000	2	1.20038	0.000187	2	Neutral
NC_030851.1	7968000	7969000	4	-0.130626	0.000191	4	Neutral
NC_030851.1	3042000	3043000	2	1.19985	0.000191	2	Neutral
NC_030851.1	5158000	5159000	7	-0.588688	0.000193	7	Neutral
NC_030851.1	39608000	39609000	7	-0.848694	0.000194	7	Neutral
NC_030851.1	32295000	32296000	2	0.910825	0.000195	2	Neutral
NC_030851.1	8827000	8828000	2	0.868567	0.000195323	2	Neutral
NC_030851.1	34562000	34563000	4	0.36357	0.000196	4	Neutral
NC_030851.1	4245000	4246000	4	-0.100296	0.000198	4	Neutral
NC_030851.1	4096000	4097000	3	0.306824	0.000198	3	Neutral
NC_030851.1	9835000	9836000	6	-0.446772	0.000199	6	Neutral
NC_030851.1	7939000	7940000	5	-0.379125	0.000199	5	Neutral
NC_030851.1	7348000	7349000	5	-0.294651	0.000199	5	Neutral
NC_030851.1	7684000	7685000	4	0.139268	0.000199	4	Neutral
NC_030851.1	4521000	4522000	4	-0.187681	0.0002	4	Neutral
NC_030851.1	10877000	10878000	6	-0.305007	0.000201	6	Neutral
NC_030851.1	37489000	37490000	3	0.605264	0.000201	3	Neutral
NC_030851.1	35173000	35174000	4	-0.243629	0.000203	4	Neutral
NC_030851.1	8157000	8158000	4	0.200481	0.000203	4	Neutral
NC_030851.1	35899000	35900000	3	0.748704	0.000203	3	Neutral
NC_030851.1	2865000	2866000	2	1.44338	0.000204	2	Neutral
NC_030851.1	35920000	35921000	11	-0.973877	0.000205	11	Neutral
NC_030851.1	7734000	7735000	4	0.152473	0.000205	4	Neutral
NC_030851.1	6459000	6460000	3	0.404124	0.000205	3	Neutral
NC_030851.1	34809000	34810000	8	-1.14409	0.000206	8	Neutral
NC_030851.1	20202000	20203000	3	0.824644	0.000207	3	Neutral
NC_030851.1	4752000	4753000	4	0.271283	0.000209	4	Neutral
NC_030851.1	9822000	9823000	3	1.0336	0.000209	3	Neutral
NC_030851.1	5908000	5909000	2	1.15741	0.00021	2	Neutral
NC_030851.1	39046000	39047000	3	0.231647	0.000211	3	Neutral
NC_030851.1	38683000	38684000	7	-0.753769	0.000212	7	Neutral
NC_030851.1	1768000	1769000	6	-0.353817	0.000212	6	Neutral
NC_030851.1	3221000	3222000	3	0.566924	0.000212	3	Neutral
NC_030851.1	32029000	32030000	3	0.657291	0.000212	3	Neutral
NC_030851.1	38921000	38922000	8	-0.740149	0.000213	8	Neutral
NC_030851.1	2903000	2904000	5	-0.559712	0.000213	5	Neutral
NC_030851.1	9838000	9839000	3	0.748355	0.000214	2	Neutral
NC_030851.1	38295000	38296000	9	-1.09458	0.000215	9	Neutral
NC_030851.1	34612000	34613000	2	1.3465	0.000217	2	Neutral
NC_030851.1	7788000	7789000	5	-0.295034	0.000218	5	Neutral
NC_030851.1	8629000	8630000	5	-0.00870607	0.000221	5	Neutral
NC_030851.1	33246000	33247000	2	1.61812	0.000221	2	Neutral
NC_030851.1	10666000	10667000	5	-0.0228116	0.000222	5	Neutral
NC_030851.1	35840000	35841000	4	0.00730431	0.000224	4	Neutral
NC_030851.1	7850000	7851000	3	0.934495	0.000224	3	Neutral
NC_030851.1	3866000	3867000	4	0.287689	0.000226	4	Neutral
NC_030851.1	7183000	7184000	5	0.23579	0.000227	5	Neutral
NC_030851.1	228000	229000	2	1.41193	0.000229	2	Neutral
NC_030851.1	39927000	39928000	6	-0.531524	0.00023	6	Neutral
NC_030851.1	3672000	3673000	5	-0.0767919	0.00023	5	Neutral
NC_030851.1	1716000	1717000	4	0.253688	0.000231	4	Neutral
NC_030851.1	29746000	29747000	2	1.58595	0.000231	2	Neutral
NC_030851.1	7389000	7390000	4	0.346316	0.000233	4	Neutral
NC_030851.1	152000	153000	5	0.186096	0.000236	5	Neutral
NC_030851.1	29323000	29324000	4	0.209076	0.000236	4	Neutral
NC_030851.1	5088000	5089000	5	-0.29047	0.000238	5	Neutral
NC_030851.1	3459000	3460000	6	-0.271995	0.000238	6	Neutral
NC_030851.1	33245000	33246000	6	-0.155098	0.000238	6	Neutral
NC_030851.1	7677000	7678000	3	1.08098	0.000238	3	Neutral
NC_030851.1	1807000	1808000	3	0.667057	0.000239	3	Neutral
NC_030851.1	3443000	3444000	4	0.567134	0.000242	4	Neutral
NC_030851.1	5226000	5227000	4	0.103479	0.000245	4	Neutral
NC_030851.1	32709000	32710000	3	0.69186	0.000245	3	Neutral
NC_030851.1	39891000	39892000	3	1.06478	0.000246	3	Neutral
NC_030851.1	10875000	10876000	11	-1.12865	0.000247	11	Neutral
NC_030851.1	38458000	38459000	3	0.746544	0.000248	3	Neutral
NC_030851.1	38700000	38701000	8	-0.664471	0.000249	8	Neutral
NC_030851.1	3501000	3502000	8	-0.453191	0.00025	8	Neutral
NC_030851.1	7378000	7379000	4	-0.103608	0.000251	4	Neutral
NC_030851.1	15256000	15257000	4	0.243508	0.000251	4	Neutral
NC_030851.1	3451000	3452000	4	0.362675	0.000253	4	Neutral
NC_030851.1	3021000	3022000	3	1.24956	0.000263	3	Neutral
NC_030851.1	39897000	39898000	3	1.47675	0.000264	3	Neutral
NC_030851.1	3291000	3292000	7	-0.161519	0.000266	7	Neutral
NC_030851.1	646000	647000	8	-0.673342	0.000268	8	Neutral
NC_030851.1	10882000	10883000	3	0.68587	0.000269	3	Neutral
NC_030851.1	10874000	10875000	9	-0.897766	0.000272	9	Neutral
NC_030851.1	38635000	38636000	3	1.25879	0.000275	3	Neutral
NC_030851.1	34538000	34539000	4	0.714338	0.000278	4	Neutral
NC_030851.1	39468000	39469000	5	0.535062	0.000281	5	Neutral
NC_030851.1	37319000	37320000	10	-0.763568	0.000282	10	Neutral
NC_030851.1	8594000	8595000	7	-0.0250932	0.000282	7	Neutral
NC_030851.1	28505000	28506000	4	0.38817	0.000283	4	Neutral
NC_030851.1	3663000	3664000	3	1.37515	0.000285	3	Neutral
NC_030851.1	37485000	37486000	4	0.603609	0.000286	4	Neutral
NC_030851.1	4284000	4285000	6	-0.120286	0.000287	6	Neutral
NC_030851.1	7648000	7649000	4	0.776539	0.00029	4	Neutral
NC_030851.1	32133000	32134000	2	1.82939	0.00029	2	Balancing selection (D > 95th percentile)
NC_030851.1	1606000	1607000	5	0.288368	0.000292	5	Neutral
NC_030851.1	39957000	39958000	4	0.456476	0.000292	4	Neutral
NC_030851.1	2242000	2243000	3	1.46929	0.000292	3	Neutral
NC_030851.1	32406000	32407000	9	-0.444747	0.000293	9	Neutral
NC_030851.1	8435000	8436000	3	1.65088	0.000294	3	Neutral
NC_030851.1	7831000	7832000	10	-0.750118	0.000296	10	Neutral
NC_030851.1	2589000	2590000	3	0.921488	0.000296	3	Neutral
NC_030851.1	32030000	32031000	5	0.259388	0.0003	5	Neutral
NC_030851.1	38437000	38438000	5	0.305415	0.0003	5	Neutral
NC_030851.1	6674000	6675000	3	1.91939	0.0003	3	Balancing selection (D > 95th percentile)
NC_030851.1	8358000	8359000	2	2.62275	0.000303	2	Balancing selection (D > 95th percentile)
NC_030851.1	36490000	36491000	7	-0.486765	0.000304	7	Neutral
NC_030851.1	1020000	1021000	7	-0.16236	0.000304	7	Neutral
NC_030851.1	8440000	8441000	6	0.276745	0.000304	6	Neutral
NC_030851.1	2422000	2423000	5	0.463051	0.000307	5	Neutral
NC_030851.1	8647000	8648000	7	-0.261025	0.000312	7	Neutral
NC_030851.1	139000	140000	5	0.45709	0.000313	5	Neutral
NC_030851.1	6033000	6034000	5	0.461795	0.00032	5	Neutral
NC_030851.1	4817000	4818000	5	0.270898	0.000322	5	Neutral
NC_030851.1	34621000	34622000	5	0.845408	0.000322	5	Neutral
NC_030851.1	3589000	3590000	10	-0.692238	0.000325	10	Neutral
NC_030851.1	34810000	34811000	8	-0.466933	0.000325	8	Neutral
NC_030851.1	5680000	5681000	3	1.65256	0.000326	3	Neutral
NC_030851.1	34411000	34412000	4	0.83485	0.000327	4	Neutral
NC_030851.1	6343000	6344000	10	-0.952598	0.000328	10	Neutral
NC_030851.1	4139000	4140000	7	-0.0937133	0.000328	7	Neutral
NC_030851.1	6944000	6945000	10	-0.648866	0.000331	10	Neutral
NC_030851.1	5728000	5729000	5	0.77896	0.000332	5	Neutral
NC_030851.1	744000	745000	6	-0.025873	0.000334	6	Neutral
NC_030851.1	4461000	4462000	5	0.418762	0.000334	5	Neutral
NC_030851.1	4436000	4437000	7	-0.232361	0.000336	7	Neutral
NC_030851.1	38728000	38729000	4	1.49124	0.000337	4	Neutral
NC_030851.1	1898000	1899000	4	0.231437	0.000339	4	Neutral
NC_030851.1	39297000	39298000	3	2.08985	0.00034	3	Balancing selection (D > 95th percentile)
NC_030851.1	35174000	35175000	6	0.194613	0.000343	6	Neutral
NC_030851.1	3521000	3522000	5	1.13016	0.000343	5	Neutral
NC_030851.1	32595000	32596000	3	1.59852	0.000344	3	Neutral
NC_030851.1	37752000	37753000	7	-0.206158	0.000346	7	Neutral
NC_030851.1	3473000	3474000	5	0.948064	0.000346	5	Neutral
NC_030851.1	9260000	9261000	2	2.32244	0.000348	2	Balancing selection (D > 95th percentile)
NC_030851.1	3867000	3868000	3	2.06827	0.00035	3	Balancing selection (D > 95th percentile)
NC_030851.1	36613000	36614000	6	0.330679	0.000351	6	Neutral
NC_030851.1	3623000	3624000	5	0.776439	0.000351	5	Neutral
NC_030851.1	306000	307000	8	-0.361903	0.000357	8	Neutral
NC_030851.1	5379000	5380000	6	-0.108383	0.000362	6	Neutral
NC_030851.1	7830000	7831000	7	0.281073	0.000365	7	Neutral
NC_030851.1	3495000	3496000	9	-0.289834	0.00037	9	Neutral
NC_030851.1	11722000	11723000	5	1.15135	0.00037	5	Neutral
NC_030851.1	37486000	37487000	8	-0.29776	0.000374	8	Neutral
NC_030851.1	2569000	2570000	5	1.17159	0.000375	5	Neutral
NC_030851.1	10873000	10874000	10	-0.491085	0.000377	10	Neutral
NC_030851.1	3479000	3480000	6	0.632017	0.000378	6	Neutral
NC_030851.1	7423000	7424000	5	0.952683	0.00038	5	Neutral
NC_030851.1	35129000	35130000	6	-0.00624456	0.000386	6	Neutral
NC_030851.1	4535000	4536000	6	-0.0977093	0.000388	6	Neutral
NC_030851.1	20203000	20204000	5	0.590643	0.000388	5	Neutral
NC_030851.1	5328000	5329000	13	-1.01837	0.000391	13	Neutral
NC_030851.1	32991000	32992000	7	0.192134	0.000391	7	Neutral
NC_030851.1	10665000	10666000	6	0.249386	0.000393	6	Neutral
NC_030851.1	5612000	5613000	4	1.22669	0.000394	4	Neutral
NC_030851.1	30305000	30306000	11	-0.354344	0.000398	11	Neutral
NC_030851.1	3624000	3625000	4	1.65571	0.000399	4	Neutral
NC_030851.1	39461000	39462000	6	0.970462	0.000402	6	Neutral
NC_030851.1	3526000	3527000	5	0.924925	0.000404	5	Neutral
NC_030851.1	25280000	25281000	5	0.763121	0.000405	5	Neutral
NC_030851.1	36997000	36998000	7	0.0638886	0.000406	7	Neutral
NC_030851.1	1713000	1714000	12	-0.661079	0.000408	12	Neutral
NC_030851.1	7735000	7736000	7	0.872718	0.000413	7	Neutral
NC_030851.1	1763000	1764000	7	-0.201899	0.000418	7	Neutral
NC_030851.1	7771000	7772000	5	2.00439	0.000418	5	Balancing selection (D > 95th percentile)
NC_030851.1	3536000	3537000	3	2.73425	0.00042	3	Balancing selection (D > 95th percentile)
NC_030851.1	5481000	5482000	14	-0.922656	0.000422	14	Neutral
NC_030851.1	31339000	31340000	9	0.0838707	0.000423	9	Neutral
NC_030851.1	35324000	35325000	5	1.38172	0.000423	5	Neutral
NC_030851.1	5967000	5968000	7	0.0691064	0.000425	7	Neutral
NC_030851.1	7137000	7138000	5	0.575936	0.000429	5	Neutral
NC_030851.1	5387000	5388000	8	0.340039	0.000432	8	Neutral
NC_030851.1	6014000	6015000	9	-0.229926	0.000433	9	Neutral
NC_030851.1	6846000	6847000	6	0.879756	0.000437	6	Neutral
NC_030851.1	2397000	2398000	7	0.957092	0.000437	7	Neutral
NC_030851.1	32896000	32897000	10	-0.108699	0.000439	10	Neutral
NC_030851.1	7535000	7536000	11	-0.4962	0.000443	11	Neutral
NC_030851.1	11130000	11131000	6	0.243216	0.000444	6	Neutral
NC_030851.1	6847000	6848000	5	1.47892	0.000445	5	Neutral
NC_030851.1	601000	602000	8	-0.337527	0.000446	7	Neutral
NC_030851.1	36221000	36222000	9	0.0084984	0.000447	9	Neutral
NC_030851.1	34848000	34849000	10	-0.415765	0.000451	9	Neutral
NC_030851.1	9182000	9183000	11	-0.24503	0.000453	11	Neutral
NC_030851.1	40076000	40077000	8	0.26956	0.000456	8	Neutral
NC_030851.1	7784000	7785000	7	0.0507901	0.000458	7	Neutral
NC_030851.1	7344000	7345000	10	-0.0682585	0.000459	10	Neutral
NC_030851.1	16986000	16987000	12	-0.575263	0.000461	12	Neutral
NC_030851.1	4107000	4108000	7	0.816435	0.000461	7	Neutral
NC_030851.1	165000	166000	9	0.0306358	0.000465	9	Neutral
NC_030851.1	3497000	3498000	8	0.45554	0.000465	8	Neutral
NC_030851.1	38124000	38125000	10	-0.142613	0.000472	10	Neutral
NC_030851.1	3222000	3223000	7	0.503794	0.000474	7	Neutral
NC_030851.1	37775000	37776000	6	0.923244	0.000474	6	Neutral
NC_030851.1	2215000	2216000	13	-0.74418	0.000476	13	Neutral
NC_030851.1	4216000	4217000	12	-0.374857	0.000478	12	Neutral
NC_030851.1	711000	712000	6	1.49014	0.000479	6	Neutral
NC_030851.1	7807000	7808000	11	-0.255676	0.000483	11	Neutral
NC_030851.1	9269000	9270000	10	-0.243667	0.000483	10	Neutral
NC_030851.1	6895000	6896000	13	-0.525232	0.000484	13	Neutral
NC_030851.1	3499000	3500000	8	0.528372	0.000485	8	Neutral
NC_030851.1	38935000	38936000	6	1.26115	0.000491	6	Neutral
NC_030851.1	34759000	34760000	8	0.220948	0.000494	8	Neutral
NC_030851.1	6845000	6846000	7	1.05102	0.000498	7	Neutral
NC_030851.1	12350000	12351000	4	2.17983	0.000499	4	Balancing selection (D > 95th percentile)
NC_030851.1	3509000	3510000	9	0.229564	0.0005	9	Neutral
NC_030851.1	3513000	3514000	11	-0.0913401	0.000504	11	Neutral
NC_030851.1	34580000	34581000	14	-0.489435	0.000507	14	Neutral
NC_030851.1	6544000	6545000	4	2.13943	0.000511	4	Balancing selection (D > 95th percentile)
NC_030851.1	9853000	9854000	9	0.250222	0.000516	9	Neutral
NC_030851.1	668000	669000	14	-0.515338	0.000521	14	Neutral
NC_030851.1	37008000	37009000	12	-0.19058	0.000523	12	Neutral
NC_030851.1	8660000	8661000	6	1.5469	0.000523	6	Neutral
NC_030851.1	34934000	34935000	6	1.14236	0.00053	6	Neutral
NC_030851.1	4215000	4216000	13	-0.21402	0.000532	13	Neutral
NC_030851.1	18386000	18387000	9	0.644972	0.000537	9	Neutral
NC_030851.1	35900000	35901000	6	1.89564	0.000545	6	Balancing selection (D > 95th percentile)
NC_030851.1	6342000	6343000	8	0.731103	0.000548	8	Neutral
NC_030851.1	39956000	39957000	7	1.39957	0.00055	7	Neutral
NC_030851.1	7813000	7814000	7	1.38013	0.000551	7	Neutral
NC_030851.1	10876000	10877000	13	-0.736228	0.000553	13	Neutral
NC_030851.1	30289000	30290000	10	0.19674	0.000553	10	Neutral
NC_030851.1	2175000	2176000	7	0.329517	0.000553823	7	Neutral
NC_030851.1	7220000	7221000	20	-1.15573	0.000554	20	Neutral
NC_030851.1	4477000	4478000	10	-0.13042	0.000559	10	Neutral
NC_030851.1	6901000	6902000	9	0.393107	0.000564	9	Neutral
NC_030851.1	7649000	7650000	13	-0.0207667	0.000567	13	Neutral
NC_030851.1	36959000	36960000	7	1.27901	0.000567	7	Neutral
NC_030851.1	3540000	3541000	10	0.59376	0.000575	10	Neutral
NC_030851.1	37487000	37488000	12	0.217251	0.000579	12	Neutral
NC_030851.1	5159000	5160000	9	0.876911	0.000588	9	Neutral
NC_030851.1	4435000	4436000	16	-0.616615	0.000602	16	Neutral
NC_030851.1	18288000	18289000	8	0.769127	0.000602	8	Neutral
NC_030851.1	29649000	29650000	9	0.933262	0.000604	9	Neutral
NC_030851.1	34700000	34701000	11	0.0651654	0.000606	11	Neutral
NC_030851.1	36220000	36221000	8	1.17906	0.000609	8	Neutral
NC_030851.1	3436000	3437000	15	-0.348513	0.000611	15	Neutral
NC_030851.1	2660000	2661000	9	0.65503	0.000614	9	Neutral
NC_030851.1	33085000	33086000	6	1.2812	0.000614	6	Neutral
NC_030851.1	3533000	3534000	15	-0.468737	0.000616	15	Neutral
NC_030851.1	33075000	33076000	6	2.41309	0.000616	6	Balancing selection (D > 95th percentile)
NC_030851.1	3751000	3752000	7	1.78803	0.000627	7	Balancing selection (D > 95th percentile)
NC_030851.1	9246000	9247000	7	2.03481	0.000628	7	Balancing selection (D > 95th percentile)
NC_030851.1	5399000	5400000	10	0.416567	0.000631	10	Neutral
NC_030851.1	1656000	1657000	9	0.985506	0.000635	9	Neutral
NC_030851.1	6769000	6770000	4	1.45234	0.000639	4	Neutral
NC_030851.1	2735000	2736000	10	0.636758	0.00064	10	Neutral
NC_030851.1	38233000	38234000	7	1.71541	0.00064	7	Neutral
NC_030851.1	42000	43000	9	0.926131	0.000644	9	Neutral
NC_030851.1	2238000	2239000	13	0.0270678	0.000645	13	Neutral
NC_030851.1	735000	736000	20	-0.794943	0.000648	20	Neutral
NC_030851.1	33379000	33380000	13	-0.110926	0.000652	13	Neutral
NC_030851.1	1781000	1782000	6	1.98726	0.000654	6	Balancing selection (D > 95th percentile)
NC_030851.1	2658000	2659000	11	0.363517	0.000658	11	Neutral
NC_030851.1	6848000	6849000	16	-0.524147	0.000662	16	Neutral
NC_030851.1	3985000	3986000	10	0.630818	0.000666	10	Neutral
NC_030851.1	7812000	7813000	14	0.0889325	0.000667	14	Neutral
NC_030851.1	43000	44000	9	0.496747	0.000669	9	Neutral
NC_030851.1	38232000	38233000	8	0.104237	0.000671	8	Neutral
NC_030851.1	10809000	10810000	8	1.4886	0.000686	8	Neutral
NC_030851.1	4886000	4887000	8	1.14544	0.000698	8	Neutral
NC_030851.1	39441000	39442000	21	-0.908197	0.000722	21	Neutral
NC_030851.1	7608000	7609000	14	0.189529	0.000722	14	Neutral
NC_030851.1	12413000	12414000	6	0.660407	0.000722	6	Neutral
NC_030851.1	2232000	2233000	14	0.489713	0.00073	14	Neutral
NC_030851.1	3505000	3506000	8	2.38188	0.000731	8	Balancing selection (D > 95th percentile)
NC_030851.1	8207000	8208000	16	0.0207659	0.000736	16	Neutral
NC_030851.1	7660000	7661000	13	-0.00924798	0.000753	13	Neutral
NC_030851.1	4246000	4247000	9	1.44528	0.000765	9	Neutral
NC_030851.1	35128000	35129000	9	-0.133814	0.000771	9	Neutral
NC_030851.1	8527000	8528000	9	2.42689	0.000775	9	Balancing selection (D > 95th percentile)
NC_030851.1	6770000	6771000	8	1.82158	0.000782	8	Balancing selection (D > 95th percentile)
NC_030851.1	716000	717000	15	0.170206	0.000783	15	Neutral
NC_030851.1	153000	154000	9	1.681	0.000784	9	Neutral
NC_030851.1	34529000	34530000	9	1.56433	0.000787	9	Neutral
NC_030851.1	645000	646000	16	-0.0967973	0.00079	16	Neutral
NC_030851.1	8361000	8362000	13	0.506828	0.000795	13	Neutral
NC_030851.1	38231000	38232000	9	1.59915	0.000795	9	Neutral
NC_030851.1	37396000	37397000	7	1.90823	0.000803	7	Balancing selection (D > 95th percentile)
NC_030851.1	31338000	31339000	12	1.04284	0.000815	12	Neutral
NC_030851.1	7326000	7327000	11	1.42034	0.000821	11	Neutral
NC_030851.1	740000	741000	13	0.800745	0.000834	13	Neutral
NC_030851.1	10708000	10709000	6	1.30909	0.000834	6	Neutral
NC_030851.1	10664000	10665000	16	-0.402303	0.000837	16	Neutral
NC_030851.1	717000	718000	17	0.110941	0.000842	17	Neutral
NC_030851.1	7977000	7978000	10	1.60834	0.000842	10	Neutral
NC_030851.1	39941000	39942000	17	-0.0149301	0.000847	17	Neutral
NC_030851.1	1710000	1711000	15	0.554299	0.000849	15	Neutral
NC_030851.1	34528000	34529000	9	1.05092	0.000869	9	Neutral
NC_030851.1	5410000	5411000	13	-0.978251	0.000899	13	Neutral
NC_030851.1	2974000	2975000	10	0.972802	0.0009	10	Neutral
NC_030851.1	3562000	3563000	11	1.24393	0.000902	11	Neutral
NC_030851.1	20614000	20615000	11	0.472022	0.000907	11	Neutral
NC_030851.1	39442000	39443000	16	0.242398	0.000919	16	Neutral
NC_030851.1	1927000	1928000	17	0.373475	0.000934	17	Neutral
NC_030851.1	3507000	3508000	12	1.61466	0.000957	12	Neutral
NC_030851.1	39440000	39441000	11	0.737295	0.000962	11	Neutral
NC_030851.1	2313000	2314000	8	0.429497	0.000966	8	Neutral
NC_030851.1	3538000	3539000	11	1.81142	0.000966	11	Balancing selection (D > 95th percentile)
NC_030851.1	38123000	38124000	14	1.04036	0.000976	14	Neutral
NC_030851.1	2734000	2735000	12	1.44543	0.000985	12	Neutral
NC_030851.1	32586000	32587000	13	1.73835	0.00101184	13	Balancing selection (D > 95th percentile)
NC_030851.1	10667000	10668000	12	1.48428	0.00102896	12	Neutral
NC_030851.1	11721000	11722000	17	0.642713	0.00106209	17	Neutral
NC_030851.1	2570000	2571000	19	0.0491104	0.00107512	19	Neutral
NC_030851.1	750000	751000	16	0.727141	0.0011407	16	Neutral
NC_030851.1	44000	45000	16	0.571694	0.00114346	16	Neutral
NC_030851.1	34849000	34850000	25	-0.389121	0.00114785	26	Neutral
NC_030851.1	3517000	3518000	14	1.70668	0.00115116	14	Neutral
NC_030851.1	1795000	1796000	18	0.733721	0.00120531	18	Neutral
NC_030851.1	1794000	1795000	15	1.3197	0.00120795	15	Neutral
NC_030851.1	37488000	37489000	19	0.86066	0.0012308	19	Neutral
NC_030851.1	11720000	11721000	16	0.99141	0.00129525	16	Neutral
NC_030851.1	7335000	7336000	15	0.807596	0.00129894	15	Neutral
NC_030851.1	33725000	33726000	27	0.155183	0.0013169	27	Neutral
NC_030851.1	35901000	35902000	12	1.38796	0.00131845	12	Neutral
NC_030851.1	3217000	3218000	17	1.24678	0.00132966	17	Neutral
NC_030851.1	33724000	33725000	25	0.278092	0.00134707	25	Neutral
NC_030851.1	3244000	3245000	29	-0.180888	0.00140518	29	Neutral
NC_030851.1	39887000	39888000	14	1.64711	0.00142201	14	Neutral
NC_030851.1	1793000	1794000	25	1.00692	0.00161314	25	Neutral
NC_030851.1	6673000	6674000	16	2.49267	0.00171747	16	Balancing selection (D > 95th percentile)
NC_030851.1	9247000	9248000	25	0.951983	0.00188337	25	Neutral
NC_030851.1	8826000	8827000	27	0.819472	0.00195308	27	Neutral
NC_030851.1	2659000	2660000	15	1.29207	0.00232371	15	Neutral
NC_030851.1	7851000	7852000	23	3.24733	0.00269069	23	Balancing selection (D > 95th percentile)
NC_030852.1	34434000	34435000	1	-0.790917	2.28e-06	1	Neutral
NC_030852.1	33742000	33743000	1	-0.872684	3.89e-06	1	Neutral
NC_030852.1	23695000	23696000	1	-0.877369	4.05e-06	1	Neutral
NC_030852.1	22297000	22298000	1	-0.883752	4.29e-06	1	Neutral
NC_030852.1	29341000	29342000	1	-0.883752	4.29e-06	1	Neutral
NC_030852.1	9763000	9764000	1	-0.885726	4.37e-06	1	Neutral
NC_030852.1	20143000	20144000	1	-0.885726	4.37e-06	1	Neutral
NC_030852.1	35295000	35296000	1	-0.885726	4.37e-06	1	Neutral
NC_030852.1	17614000	17615000	1	-0.88763	4.45e-06	1	Neutral
NC_030852.1	21188000	21189000	1	-0.88763	4.45e-06	1	Neutral
NC_030852.1	28799000	28800000	1	-0.88763	4.45e-06	1	Neutral
NC_030852.1	31661000	31662000	1	-0.88763	4.45e-06	1	Neutral
NC_030852.1	31765000	31766000	1	-0.88763	4.45e-06	1	Neutral
NC_030852.1	22325000	22326000	1	-0.889469	4.53e-06	1	Neutral
NC_030852.1	32702000	32703000	1	-0.889469	4.53e-06	1	Neutral
NC_030852.1	483000	484000	1	-0.891244	4.61e-06	1	Neutral
NC_030852.1	31559000	31560000	1	-0.891244	4.61e-06	1	Neutral
NC_030852.1	34720000	34721000	1	-0.89296	4.69e-06	1	Neutral
NC_030852.1	5100000	5101000	1	-0.896224	4.85e-06	1	Neutral
NC_030852.1	21270000	21271000	1	-0.899283	5.01e-06	1	Neutral
NC_030852.1	34020000	34021000	1	-0.899283	5.01e-06	1	Neutral
NC_030852.1	30963000	30964000	1	-0.902154	5.17e-06	1	Neutral
NC_030852.1	20068000	20069000	1	-0.904856	5.33e-06	1	Neutral
NC_030852.1	30776000	30777000	1	-0.904856	5.33e-06	1	Neutral
NC_030852.1	33052000	33053000	1	-0.783819	8.82e-06	1	Neutral
NC_030852.1	34906000	34907000	1	-0.783819	8.82e-06	1	Neutral
NC_030852.1	32980000	32981000	2	-1.20405	9.22e-06	2	Positive selection (D < 5th percentile)
NC_030852.1	23733000	23734000	2	-1.20517	9.3e-06	2	Positive selection (D < 5th percentile)
NC_030852.1	35074000	35075000	2	-1.20501	9.3e-06	2	Positive selection (D < 5th percentile)
NC_030852.1	1481000	1482000	1	-0.794289	9.3e-06	1	Neutral
NC_030852.1	28785000	28786000	1	-0.794289	9.3e-06	1	Neutral
NC_030852.1	29245000	29246000	1	-0.794289	9.3e-06	1	Neutral
NC_030852.1	34259000	34260000	1	-0.806723	9.94e-06	1	Neutral
NC_030852.1	33196000	33197000	1	-0.809593	1.01e-05	1	Neutral
NC_030852.1	196000	197000	1	-0.812376	1.03e-05	1	Neutral
NC_030852.1	34477000	34478000	1	-0.624231	1.09e-05	1	Neutral
NC_030852.1	30065000	30066000	3	-1.40099	1.28e-05	3	Positive selection (D < 5th percentile)
NC_030852.1	30319000	30320000	2	-1.12059	1.28e-05	2	Neutral
NC_030852.1	29755000	29756000	1	-0.692365	1.36e-05	1	Neutral
NC_030852.1	2126000	2127000	1	-0.697334	1.38e-05	1	Neutral
NC_030852.1	25702000	25703000	1	-0.711301	1.45e-05	1	Neutral
NC_030852.1	589000	590000	1	-0.724011	1.53e-05	1	Neutral
NC_030852.1	36287000	36288000	1	-0.543213	1.57e-05	1	Neutral
NC_030852.1	4967000	4968000	1	-0.559532	1.63e-05	1	Neutral
NC_030852.1	30891000	30892000	2	-1.05138	1.7e-05	2	Neutral
NC_030852.1	30863000	30864000	1	-0.574711	1.7e-05	1	Neutral
NC_030852.1	16739000	16740000	2	-1.05128	1.72e-05	2	Neutral
NC_030852.1	25912000	25913000	1	-0.588865	1.76e-05	1	Neutral
NC_030852.1	31988000	31989000	2	-1.07202	1.84e-05	2	Neutral
NC_030852.1	36274000	36275000	1	-0.425868	1.9e-05	1	Neutral
NC_030852.1	3682000	3683000	1	-0.436421	1.94e-05	1	Neutral
NC_030852.1	24949000	24950000	1	-0.436421	1.94e-05	1	Neutral
NC_030852.1	29281000	29282000	1	-0.436421	1.94e-05	1	Neutral
NC_030852.1	4673000	4674000	2	-1.08583	1.96e-05	2	Neutral
NC_030852.1	31643000	31644000	1	-0.465855	2.06e-05	1	Neutral
NC_030852.1	26711000	26712000	1	-0.279452	2.12e-05	1	Neutral
NC_030852.1	8512000	8513000	1	-0.483812	2.14e-05	1	Neutral
NC_030852.1	861000	862000	1	-0.500589	2.22e-05	1	Neutral
NC_030852.1	25943000	25944000	2	-0.999826	2.23e-05	2	Neutral
NC_030852.1	20775000	20776000	2	-0.997186	2.24e-05	2	Neutral
NC_030852.1	2450000	2451000	2	-0.998499	2.25e-05	2	Neutral
NC_030852.1	18591000	18592000	1	-0.508571	2.26e-05	1	Neutral
NC_030852.1	32168000	32169000	1	-0.508571	2.26e-05	1	Neutral
NC_030852.1	32922000	32923000	1	-0.31954	2.26e-05	1	Neutral
NC_030852.1	35427000	35428000	1	-0.343865	2.36e-05	1	Neutral
NC_030852.1	31618000	31619000	1	-0.531041	2.38e-05	1	Neutral
NC_030852.1	32336000	32337000	1	-0.531041	2.38e-05	1	Neutral
NC_030852.1	29269000	29270000	1	-0.355383	2.4e-05	1	Neutral
NC_030852.1	26528000	26529000	1	-0.377241	2.5e-05	1	Neutral
NC_030852.1	17658000	17659000	1	-0.397655	2.6e-05	1	Neutral
NC_030852.1	31913000	31914000	1	-0.407365	2.64e-05	1	Neutral
NC_030852.1	20147000	20148000	2	-0.935109	2.71e-05	2	Neutral
NC_030852.1	34750000	34751000	1	-0.269197	2.83e-05	1	Neutral
NC_030852.1	33420000	33421000	2	-0.964129	2.87e-05	2	Neutral
NC_030852.1	34010000	34011000	1	-0.304808	3e-05	1	Neutral
NC_030852.1	30008000	30009000	1	-0.129824	3.01e-05	1	Neutral
NC_030852.1	5256000	5257000	1	-0.315916	3.06e-05	1	Neutral
NC_030852.1	5821000	5822000	1	-0.145044	3.08e-05	1	Neutral
NC_030852.1	33889000	33890000	2	-0.470163	3.14e-05	2	Neutral
NC_030852.1	35949000	35950000	2	-0.774111	3.23e-05	2	Neutral
NC_030852.1	25408000	25409000	2	-0.765217	3.31e-05	2	Neutral
NC_030852.1	29557000	29558000	1	-0.200948	3.33e-05	1	Neutral
NC_030852.1	34664000	34665000	3	-1.11167	3.34e-05	3	Neutral
NC_030852.1	23574000	23575000	2	-0.908769	3.37e-05	2	Neutral
NC_030852.1	28358000	28359000	2	-0.777778	3.39e-05	2	Neutral
NC_030852.1	30024000	30025000	1	-0.2138	3.4e-05	1	Neutral
NC_030852.1	31107000	31108000	2	-0.0514379	3.42e-05	2	Neutral
NC_030852.1	33524000	33525000	2	-0.683295	3.44e-05	2	Neutral
NC_030852.1	23275000	23276000	1	-0.226243	3.46e-05	1	Neutral
NC_030852.1	21212000	21213000	2	-0.807371	3.54e-05	2	Neutral
NC_030852.1	28463000	28464000	2	-0.920162	3.57e-05	2	Neutral
NC_030852.1	14179000	14180000	1	-0.0807341	3.57e-05	1	Neutral
NC_030852.1	34837000	34838000	2	-0.81393	3.59e-05	2	Neutral
NC_030852.1	5439000	5440000	2	-0.720701	3.68e-05	2	Neutral
NC_030852.1	227000	228000	1	-0.11047	3.71e-05	1	Neutral
NC_030852.1	25152000	25153000	1	-0.11047	3.71e-05	1	Neutral
NC_030852.1	558000	559000	3	-1.17041	3.76e-05	3	Positive selection (D < 5th percentile)
NC_030852.1	29595000	29596000	4	-1.32756	3.8e-05	4	Positive selection (D < 5th percentile)
NC_030852.1	34696000	34697000	2	-0.850777	3.81e-05	2	Neutral
NC_030852.1	666000	667000	2	-0.737737	3.91e-05	2	Neutral
NC_030852.1	29774000	29775000	2	-0.734098	3.93e-05	2	Neutral
NC_030852.1	5822000	5823000	1	-0.151639	3.93e-05	1	Neutral
NC_030852.1	24860000	24861000	1	-0.0218968	4.09e-05	1	Neutral
NC_030852.1	32918000	32919000	1	-0.0666961	4.33e-05	1	Neutral
NC_030852.1	33890000	33891000	3	-0.363036	4.5e-05	3	Neutral
NC_030852.1	27921000	27922000	2	-0.563515	4.54e-05	2	Neutral
NC_030852.1	2515000	2516000	2	-0.711814	4.57e-05	2	Neutral
NC_030852.1	30093000	30094000	1	0.0321217	4.63e-05	1	Neutral
NC_030852.1	213000	214000	2	-0.521287	4.64e-05	2	Neutral
NC_030852.1	17647000	17648000	3	-0.989188	4.76e-05	3	Neutral
NC_030852.1	21784000	21785000	1	0.149536	4.81e-05	1	Neutral
NC_030852.1	32537000	32538000	2	-0.555675	5.05e-05	2	Neutral
NC_030852.1	32510000	32511000	1	0.3984	5.05e-05	1	Neutral
NC_030852.1	27539000	27540000	2	-0.527917	5.1e-05	2	Neutral
NC_030852.1	2127000	2128000	1	0.0980418	5.1e-05	1	Neutral
NC_030852.1	29196000	29197000	2	-0.537019	5.2e-05	2	Neutral
NC_030852.1	25291000	25292000	2	-0.539478	5.24e-05	2	Neutral
NC_030852.1	25712000	25713000	1	-0.0679899	5.24e-05	1	Neutral
NC_030852.1	33948000	33949000	1	-0.0679899	5.24e-05	1	Neutral
NC_030852.1	30789000	30790000	5	-1.42252	5.26e-05	5	Positive selection (D < 5th percentile)
NC_030852.1	26781000	26782000	6	-1.58669	5.36e-05	6	Positive selection (D < 5th percentile)
NC_030852.1	31520000	31521000	1	0.195486	5.37e-05	1	Neutral
NC_030852.1	5013000	5014000	2	-0.497555	5.71e-05	2	Neutral
NC_030852.1	945000	946000	2	-0.361817	5.98e-05	2	Neutral
NC_030852.1	27581000	27582000	2	-0.423292	6.04e-05	2	Neutral
NC_030852.1	25336000	25337000	2	-0.641572	6.06e-05	2	Neutral
NC_030852.1	3683000	3684000	2	-0.434075	6.17e-05	2	Neutral
NC_030852.1	7417000	7418000	1	0.0673684	6.2e-05	1	Neutral
NC_030852.1	27784000	27785000	1	0.186597	6.28e-05	1	Neutral
NC_030852.1	32125000	32126000	1	0.313349	6.31e-05	1	Neutral
NC_030852.1	26773000	26774000	3	-0.811121	6.38e-05	3	Neutral
NC_030852.1	29105000	29106000	3	-0.612809	6.59e-05	3	Neutral
NC_030852.1	23952000	23953000	1	0.139363	6.62e-05	1	Neutral
NC_030852.1	35428000	35429000	2	-0.410026	6.67e-05	2	Neutral
NC_030852.1	29285000	29286000	2	-0.558815	6.68e-05	2	Neutral
NC_030852.1	29678000	29679000	1	0.124432	6.73e-05	1	Neutral
NC_030852.1	30337000	30338000	3	-0.945679	6.83e-05	3	Neutral
NC_030852.1	25911000	25912000	2	-0.325579	7.04e-05	2	Neutral
NC_030852.1	32935000	32936000	3	-0.884755	7.05e-05	3	Neutral
NC_030852.1	708000	709000	8	-1.74471	7.15e-05	8	Positive selection (D < 5th percentile)
NC_030852.1	35683000	35684000	1	0.0683919	7.18e-05	1	Neutral
NC_030852.1	22167000	22168000	2	-0.242623	7.19e-05	2	Neutral
NC_030852.1	496000	497000	4	-0.93803	7.49e-05	4	Neutral
NC_030852.1	27395000	27396000	1	0.149536	7.51e-05	1	Neutral
NC_030852.1	16897000	16898000	2	-0.442408	7.55e-05	2	Neutral
NC_030852.1	3877000	3878000	2	-0.464351	7.58e-05	2	Neutral
NC_030852.1	34011000	34012000	6	-1.38935	7.65e-05	6	Positive selection (D < 5th percentile)
NC_030852.1	24767000	24768000	4	-1.01536	7.67e-05	4	Neutral
NC_030852.1	1390000	1391000	1	0.364645	7.7e-05	1	Neutral
NC_030852.1	24161000	24162000	2	-0.162654	7.82e-05	2	Neutral
NC_030852.1	8285000	8286000	4	-0.862889	7.88e-05	4	Neutral
NC_030852.1	35182000	35183000	2	-0.254312	7.94e-05	2	Neutral
NC_030852.1	29696000	29697000	2	-0.272783	8.12e-05	2	Neutral
NC_030852.1	34785000	34786000	3	-0.64583	8.22e-05	3	Neutral
NC_030852.1	34438000	34439000	2	-0.0975874	8.29e-05	2	Neutral
NC_030852.1	1391000	1392000	2	-0.157576	8.59e-05	2	Neutral
NC_030852.1	33211000	33212000	1	0.795374	8.64e-05	1	Neutral
NC_030852.1	34484000	34485000	2	0.339024	8.76e-05	2	Neutral
NC_030852.1	31275000	31276000	5	-1.06257	8.77e-05	5	Neutral
NC_030852.1	29340000	29341000	4	-0.753981	8.83e-05	4	Neutral
NC_030852.1	22432000	22433000	3	-0.522813	8.9e-05	3	Neutral
NC_030852.1	3676000	3677000	4	-1.03028	8.97e-05	4	Neutral
NC_030852.1	25237000	25238000	1	1.30099	8.98e-05	1	Neutral
NC_030852.1	36276000	36277000	1	0.750209	8.99e-05	1	Neutral
NC_030852.1	35675000	35676000	7	-1.49765	9.07e-05	7	Positive selection (D < 5th percentile)
NC_030852.1	5424000	5425000	2	-0.255201	9.09e-05	2	Neutral
NC_030852.1	33442000	33443000	4	-0.846935	9.39e-05	4	Neutral
NC_030852.1	33254000	33255000	1	0.977067	9.52e-05	1	Neutral
NC_030852.1	30253000	30254000	1	1.05901	9.58e-05	1	Neutral
NC_030852.1	36240000	36241000	3	-0.582612	9.6e-05	3	Neutral
NC_030852.1	17389000	17390000	1	1.03431	9.79e-05	1	Neutral
NC_030852.1	26450000	26451000	2	-0.0888514	9.8e-05	2	Neutral
NC_030852.1	33589000	33590000	3	-0.453271	9.86e-05	3	Neutral
NC_030852.1	28661000	28662000	1	1.34956	9.86e-05	1	Neutral
NC_030852.1	30107000	30108000	3	-0.304269	0.000103	3	Neutral
NC_030852.1	21781000	21782000	5	-0.866612	0.000105	5	Neutral
NC_030852.1	27124000	27125000	3	-0.408981	0.000105	3	Neutral
NC_030852.1	25487000	25488000	2	-0.173695	0.000105	2	Neutral
NC_030852.1	401000	402000	1	0.341945	0.000109	1	Neutral
NC_030852.1	29424000	29425000	6	-1.29931	0.00011	6	Positive selection (D < 5th percentile)
NC_030852.1	28462000	28463000	4	-1.01259	0.00011	4	Neutral
NC_030852.1	34337000	34338000	2	-0.0865196	0.00011	2	Neutral
NC_030852.1	23708000	23709000	2	0.0331165	0.00011	2	Neutral
NC_030852.1	25820000	25821000	5	-0.94103	0.000112	5	Neutral
NC_030852.1	30440000	30441000	3	-0.396462	0.000114	3	Neutral
NC_030852.1	32501000	32502000	5	-0.920786	0.000115	5	Neutral
NC_030852.1	25800000	25801000	2	0.395318	0.000116	2	Neutral
NC_030852.1	26757000	26758000	3	-0.11498	0.00012	3	Neutral
NC_030852.1	29672000	29673000	2	0.538545	0.00012	2	Neutral
NC_030852.1	35790000	35791000	4	-0.614444	0.000122	4	Neutral
NC_030852.1	939000	940000	2	0.279251	0.000122	2	Neutral
NC_030852.1	29458000	29459000	7	-1.09619	0.000123	7	Neutral
NC_030852.1	28465000	28466000	3	-0.258427	0.000123	3	Neutral
NC_030852.1	24357000	24358000	4	-0.708588	0.000126	4	Neutral
NC_030852.1	25991000	25992000	3	-0.408279	0.000126	3	Neutral
NC_030852.1	35674000	35675000	3	0.229339	0.000126	3	Neutral
NC_030852.1	7760000	7761000	5	-0.925751	0.000127	5	Neutral
NC_030852.1	35843000	35844000	2	-0.0785	0.000127	2	Neutral
NC_030852.1	15924000	15925000	2	0.582284	0.000127	2	Neutral
NC_030852.1	34093000	34094000	6	-1.27881	0.00013	6	Positive selection (D < 5th percentile)
NC_030852.1	26161000	26162000	3	-0.088223	0.00013	3	Neutral
NC_030852.1	20866000	20867000	2	0.867375	0.000131	2	Neutral
NC_030852.1	30793000	30794000	4	-0.527868	0.000133	4	Neutral
NC_030852.1	1589000	1590000	1	1.67232	0.000133	1	Neutral
NC_030852.1	33405000	33406000	4	-0.281328	0.000135	4	Neutral
NC_030852.1	34680000	34681000	4	-0.275689	0.000137	4	Neutral
NC_030852.1	28682000	28683000	2	0.489605	0.000137	2	Neutral
NC_030852.1	28434000	28435000	1	1.9625	0.000138	1	Balancing selection (D > 95th percentile)
NC_030852.1	34208000	34209000	4	-0.373558	0.000139	4	Neutral
NC_030852.1	32013000	32014000	2	0.441705	0.000139	2	Neutral
NC_030852.1	33525000	33526000	1	1.47804	0.00014	1	Neutral
NC_030852.1	28798000	28799000	5	-0.632407	0.000142	5	Neutral
NC_030852.1	30964000	30965000	5	-0.559349	0.000143	5	Neutral
NC_030852.1	25960000	25961000	3	-0.237905	0.000143	3	Neutral
NC_030852.1	35193000	35194000	3	-0.156235	0.000143	3	Neutral
NC_030852.1	33100000	33101000	2	0.421399	0.000145	2	Neutral
NC_030852.1	27890000	27891000	2	0.466203	0.000145	2	Neutral
NC_030852.1	29210000	29211000	2	0.930055	0.000145	2	Neutral
NC_030852.1	31213000	31214000	1	1.49354	0.000145	1	Neutral
NC_030852.1	33905000	33906000	11	-1.72802	0.000146	11	Positive selection (D < 5th percentile)
NC_030852.1	35122000	35123000	5	-0.904155	0.000147	5	Neutral
NC_030852.1	25111000	25112000	5	-0.611663	0.000148	5	Neutral
NC_030852.1	26098000	26099000	4	-0.323559	0.000148	4	Neutral
NC_030852.1	18728000	18729000	3	-0.0203374	0.000148	3	Neutral
NC_030852.1	28464000	28465000	3	0.126	0.000148	3	Neutral
NC_030852.1	28725000	28726000	3	0.133275	0.000148	3	Neutral
NC_030852.1	26160000	26161000	1	1.61943	0.000148	1	Neutral
NC_030852.1	31106000	31107000	1	1.91569	0.00015	1	Balancing selection (D > 95th percentile)
NC_030852.1	31278000	31279000	3	-0.121858	0.000151	3	Neutral
NC_030852.1	34596000	34597000	2	0.736556	0.000152	2	Neutral
NC_030852.1	7950000	7951000	2	0.390982	0.000153	2	Neutral
NC_030852.1	33242000	33243000	2	0.633566	0.000153	2	Neutral
NC_030852.1	317000	318000	6	-0.967527	0.000154	6	Neutral
NC_030852.1	26216000	26217000	6	-0.650109	0.000154	6	Neutral
NC_030852.1	33265000	33266000	5	-0.764874	0.000155	5	Neutral
NC_030852.1	33520000	33521000	2	0.323357	0.000156	2	Neutral
NC_030852.1	32731000	32732000	2	0.593146	0.000156	2	Neutral
NC_030852.1	495000	496000	2	1.04513	0.000156	2	Neutral
NC_030852.1	30692000	30693000	2	0.816255	0.000157	2	Neutral
NC_030852.1	25818000	25819000	1	1.69101	0.000157	1	Neutral
NC_030852.1	28660000	28661000	2	0.62085	0.000158	2	Neutral
NC_030852.1	33537000	33538000	2	0.821674	0.000158	2	Neutral
NC_030852.1	22122000	22123000	1	1.74586	0.00016	1	Balancing selection (D > 95th percentile)
NC_030852.1	26427000	26428000	3	-0.0510604	0.000161	3	Neutral
NC_030852.1	32462000	32463000	1	1.93432	0.000161	1	Balancing selection (D > 95th percentile)
NC_030852.1	25876000	25877000	2	0.668861	0.000163	2	Neutral
NC_030852.1	34554000	34555000	7	-0.873172	0.000164	7	Neutral
NC_030852.1	32453000	32454000	2	0.633698	0.000165	2	Neutral
NC_030852.1	35928000	35929000	1	1.92269	0.000165	1	Balancing selection (D > 95th percentile)
NC_030852.1	35286000	35287000	1	1.6013	0.000166	1	Neutral
NC_030852.1	1990000	1991000	5	-0.455335	0.000167	5	Neutral
NC_030852.1	31074000	31075000	5	-0.436117	0.000167	5	Neutral
NC_030852.1	32120000	32121000	2	0.79957	0.000167	2	Neutral
NC_030852.1	30009000	30010000	4	0.0100902	0.000169	4	Neutral
NC_030852.1	34050000	34051000	3	0.101427	0.000169	3	Neutral
NC_030852.1	34647000	34648000	1	1.99268	0.000169	1	Balancing selection (D > 95th percentile)
NC_030852.1	23360000	23361000	3	0.31786	0.00017	3	Neutral
NC_030852.1	25363000	25364000	5	-0.581261	0.000171	5	Neutral
NC_030852.1	1482000	1483000	3	0.173979	0.000171	3	Neutral
NC_030852.1	31626000	31627000	2	0.499616	0.000171	2	Neutral
NC_030852.1	26483000	26484000	2	0.717672	0.000171	2	Neutral
NC_030852.1	31338000	31339000	2	0.8275	0.000171	2	Neutral
NC_030852.1	34531000	34532000	2	1.25536	0.000172	2	Neutral
NC_030852.1	30858000	30859000	3	0.36043	0.000175	3	Neutral
NC_030852.1	35025000	35026000	2	1.32354	0.000175	2	Neutral
NC_030852.1	29919000	29920000	1	1.91288	0.000175	1	Balancing selection (D > 95th percentile)
NC_030852.1	27897000	27898000	3	0.18761	0.000177	3	Neutral
NC_030852.1	29642000	29643000	2	0.303388	0.000178	2	Neutral
NC_030852.1	30450000	30451000	2	0.781562	0.000178	2	Neutral
NC_030852.1	34978000	34979000	2	0.90109	0.000178	2	Neutral
NC_030852.1	30338000	30339000	3	0.18223	0.000181	3	Neutral
NC_030852.1	34500000	34501000	2	1.13188	0.000181	2	Neutral
NC_030852.1	26635000	26636000	4	0.0381038	0.000184	4	Neutral
NC_030852.1	30096000	30097000	3	0.516982	0.000184	3	Neutral
NC_030852.1	33212000	33213000	5	-0.486662	0.000185	5	Neutral
NC_030852.1	29409000	29410000	4	-0.0983163	0.000188	4	Neutral
NC_030852.1	30260000	30261000	3	0.578672	0.000189	3	Neutral
NC_030852.1	659000	660000	4	0.042951	0.00019	4	Neutral
NC_030852.1	33127000	33128000	3	0.377541	0.00019	3	Neutral
NC_030852.1	7944000	7945000	3	-0.00840711	0.000192	3	Neutral
NC_030852.1	33765000	33766000	3	0.276619	0.000192	3	Neutral
NC_030852.1	16738000	16739000	2	1.09468	0.000194	2	Neutral
NC_030852.1	23467000	23468000	4	-0.184653	0.000195	4	Neutral
NC_030852.1	25989000	25990000	2	0.96097	0.000195	2	Neutral
NC_030852.1	30823000	30824000	2	1.23745	0.000195	2	Neutral
NC_030852.1	31064000	31065000	6	-0.579378	0.000196	6	Neutral
NC_030852.1	28081000	28082000	2	1.01106	0.000196862	2	Neutral
NC_030852.1	30794000	30795000	11	-1.4381	0.000197	11	Positive selection (D < 5th percentile)
NC_030852.1	5459000	5460000	10	-1.25735	0.000199	10	Positive selection (D < 5th percentile)
NC_030852.1	22269000	22270000	4	-0.0665333	0.000199	4	Neutral
NC_030852.1	17156000	17157000	2	0.893067	0.000199	2	Neutral
NC_030852.1	32813000	32814000	5	-0.534441	0.0002	5	Neutral
NC_030852.1	26461000	26462000	7	-0.839807	0.000202	7	Neutral
NC_030852.1	35506000	35507000	4	-0.28486	0.000203	4	Neutral
NC_030852.1	22640000	22641000	3	0.287353	0.000203	3	Neutral
NC_030852.1	28160000	28161000	3	0.422227	0.000203	3	Neutral
NC_030852.1	22449000	22450000	3	0.591618	0.000205	3	Neutral
NC_030852.1	32829000	32830000	7	-1.00538	0.000207	7	Neutral
NC_030852.1	28461000	28462000	7	-0.761676	0.000207	7	Neutral
NC_030852.1	31277000	31278000	4	-0.02766	0.000207	4	Neutral
NC_030852.1	30947000	30948000	4	-0.246631	0.000208	4	Neutral
NC_030852.1	29481000	29482000	5	-0.416383	0.000209	5	Neutral
NC_030852.1	31996000	31997000	2	1.29792	0.000211	2	Neutral
NC_030852.1	34670000	34671000	2	1.36537	0.000211	2	Neutral
NC_030852.1	33291000	33292000	9	-1.30196	0.000212	9	Positive selection (D < 5th percentile)
NC_030852.1	26278000	26279000	5	-0.462742	0.000212	5	Neutral
NC_030852.1	34052000	34053000	3	1.38066	0.000212	3	Neutral
NC_030852.1	31521000	31522000	2	1.41975	0.000212	2	Neutral
NC_030852.1	30247000	30248000	4	0.137397	0.000214	4	Neutral
NC_030852.1	4314000	4315000	6	-0.249542	0.000218	6	Neutral
NC_030852.1	34028000	34029000	6	-0.20884	0.000218	6	Neutral
NC_030852.1	23530000	23531000	4	0.0332384	0.000218	4	Neutral
NC_030852.1	31379000	31380000	3	0.457458	0.000218	3	Neutral
NC_030852.1	19098000	19099000	6	-0.543669	0.000221	6	Neutral
NC_030852.1	32012000	32013000	5	-0.205468	0.000221	5	Neutral
NC_030852.1	30615000	30616000	3	0.611722	0.000221	3	Neutral
NC_030852.1	27636000	27637000	3	0.848936	0.000223	3	Neutral
NC_030852.1	33370000	33371000	6	-0.32468	0.000224	6	Neutral
NC_030852.1	27708000	27709000	5	-0.367203	0.000225	5	Neutral
NC_030852.1	31903000	31904000	5	0.0878821	0.000226	5	Neutral
NC_030852.1	29906000	29907000	4	0.420221	0.000227	4	Neutral
NC_030852.1	31454000	31455000	6	-0.463847	0.000231	6	Neutral
NC_030852.1	29899000	29900000	6	-0.274375	0.000231	6	Neutral
NC_030852.1	21945000	21946000	4	0.434345	0.000232	4	Neutral
NC_030852.1	26204000	26205000	2	1.31619	0.000232	2	Neutral
NC_030852.1	25856000	25857000	11	-1.32177	0.000233	11	Positive selection (D < 5th percentile)
NC_030852.1	29104000	29105000	7	-0.941817	0.000234	7	Neutral
NC_030852.1	3067000	3068000	5	-0.315705	0.000234	5	Neutral
NC_030852.1	31033000	31034000	4	0.225271	0.000235	4	Neutral
NC_030852.1	33744000	33745000	3	0.995522	0.000235	3	Neutral
NC_030852.1	7714000	7715000	5	-0.532584	0.000237	5	Neutral
NC_030852.1	29522000	29523000	4	0.396544	0.00024	4	Neutral
NC_030852.1	31959000	31960000	9	-1.55093	0.000241	9	Positive selection (D < 5th percentile)
NC_030852.1	27385000	27386000	4	0.113538	0.000241	4	Neutral
NC_030852.1	2838000	2839000	5	-0.109921	0.000242	5	Neutral
NC_030852.1	25672000	25673000	4	0.343508	0.000243	4	Neutral
NC_030852.1	33356000	33357000	6	-0.498286	0.000248	6	Neutral
NC_030852.1	4966000	4967000	6	-0.393791	0.000251	6	Neutral
NC_030852.1	26012000	26013000	5	-0.321872	0.000251	5	Neutral
NC_030852.1	29556000	29557000	7	-0.510638	0.000253	7	Neutral
NC_030852.1	23714000	23715000	3	0.784633	0.000254	3	Neutral
NC_030852.1	35121000	35122000	7	-0.515438	0.000255	7	Neutral
NC_030852.1	6092000	6093000	6	-0.666133	0.000256	6	Neutral
NC_030852.1	33046000	33047000	4	0.911777	0.000256	4	Neutral
NC_030852.1	25882000	25883000	5	-0.177433	0.000257	5	Neutral
NC_030852.1	25273000	25274000	3	0.326941	0.000257	3	Neutral
NC_030852.1	29460000	29461000	12	-1.31834	0.000258	12	Positive selection (D < 5th percentile)
NC_030852.1	31723000	31724000	2	1.87563	0.000258	2	Balancing selection (D > 95th percentile)
NC_030852.1	32399000	32400000	5	0.232241	0.000261	5	Neutral
NC_030852.1	26666000	26667000	5	-0.299669	0.000264	5	Neutral
NC_030852.1	21358000	21359000	5	-0.05942	0.000264	5	Neutral
NC_030852.1	21657000	21658000	5	-0.0853318	0.000265	5	Neutral
NC_030852.1	34101000	34102000	4	0.247819	0.000266	4	Neutral
NC_030852.1	34721000	34722000	9	-0.947622	0.000269	9	Neutral
NC_030852.1	26822000	26823000	3	1.17343	0.000271	3	Neutral
NC_030852.1	26739000	26740000	5	-0.0735412	0.000275	5	Neutral
NC_030852.1	31743000	31744000	4	0.452529	0.000276	4	Neutral
NC_030852.1	27771000	27772000	5	-0.124422	0.000278	5	Neutral
NC_030852.1	30095000	30096000	10	-0.901825	0.000279	10	Neutral
NC_030852.1	22026000	22027000	7	-0.426037	0.00028	7	Neutral
NC_030852.1	3344000	3345000	6	-0.316872	0.000282	6	Neutral
NC_030852.1	20069000	20070000	5	0.319636	0.000282	5	Neutral
NC_030852.1	27150000	27151000	6	-0.0698898	0.000285	6	Neutral
NC_030852.1	31785000	31786000	6	-0.190237	0.000286	6	Neutral
NC_030852.1	26700000	26701000	7	-0.343149	0.000287	7	Neutral
NC_030852.1	1991000	1992000	9	-0.650582	0.000288	9	Neutral
NC_030852.1	26846000	26847000	6	-0.247736	0.000288	6	Neutral
NC_030852.1	31535000	31536000	2	0.868911	0.00029	2	Neutral
NC_030852.1	34722000	34723000	3	1.33982	0.00029	3	Neutral
NC_030852.1	31380000	31381000	4	0.868031	0.000292	4	Neutral
NC_030852.1	26789000	26790000	5	-0.000944	0.000293	5	Neutral
NC_030852.1	22260000	22261000	6	0.0917896	0.000297	6	Neutral
NC_030852.1	33791000	33792000	4	0.548427	0.000297	4	Neutral
NC_030852.1	35964000	35965000	6	-0.0941619	0.000298	6	Neutral
NC_030852.1	27789000	27790000	3	1.6886	0.000298	3	Neutral
NC_030852.1	33883000	33884000	11	-1.14509	0.0003	11	Neutral
NC_030852.1	30090000	30091000	3	1.63744	0.000303	3	Neutral
NC_030852.1	7715000	7716000	5	0.168291	0.000307	5	Neutral
NC_030852.1	35791000	35792000	5	0.278704	0.000307	5	Neutral
NC_030852.1	26756000	26757000	7	-0.329554	0.000308	7	Neutral
NC_030852.1	36288000	36289000	7	-0.146854	0.00031	7	Neutral
NC_030852.1	31742000	31743000	4	0.66189	0.00031	4	Neutral
NC_030852.1	28452000	28453000	2	1.7761	0.000314	2	Balancing selection (D > 95th percentile)
NC_030852.1	316000	317000	6	0.154977	0.000315	6	Neutral
NC_030852.1	28683000	28684000	7	-0.355071	0.000316	7	Neutral
NC_030852.1	31455000	31456000	6	-0.272282	0.000322	6	Neutral
NC_030852.1	1877000	1878000	11	-0.816561	0.000323	11	Neutral
NC_030852.1	33743000	33744000	5	0.480117	0.000323	5	Neutral
NC_030852.1	28382000	28383000	5	0.465162	0.000324	5	Neutral
NC_030852.1	36237000	36238000	7	-0.0732123	0.000325	7	Neutral
NC_030852.1	539000	540000	6	-0.216285	0.000328	6	Neutral
NC_030852.1	21931000	21932000	6	0.376141	0.000331	6	Neutral
NC_030852.1	29933000	29934000	5	-0.0816648	0.000334	5	Neutral
NC_030852.1	2516000	2517000	12	-1.07565	0.000336	12	Neutral
NC_030852.1	3928000	3929000	9	-0.617142	0.000336	9	Neutral
NC_030852.1	3644000	3645000	4	1.34952	0.000336	4	Neutral
NC_030852.1	25597000	25598000	3	1.3275	0.000337	3	Neutral
NC_030852.1	31617000	31618000	7	0.0134446	0.00034	7	Neutral
NC_030852.1	33419000	33420000	9	-0.532502	0.000341	9	Neutral
NC_030852.1	19525000	19526000	2	1.79043	0.000341	2	Balancing selection (D > 95th percentile)
NC_030852.1	7669000	7670000	5	0.276124	0.000343	5	Neutral
NC_030852.1	33329000	33330000	7	-0.145115	0.000346	7	Neutral
NC_030852.1	31936000	31937000	3	1.2813	0.000346	3	Neutral
NC_030852.1	17608000	17609000	3	1.49647	0.000346	3	Neutral
NC_030852.1	8087000	8088000	4	0.918554	0.000347	4	Neutral
NC_030852.1	29411000	29412000	10	-0.600653	0.000348	10	Neutral
NC_030852.1	29555000	29556000	5	0.649287	0.000348	5	Neutral
NC_030852.1	33904000	33905000	7	0.604253	0.000351	7	Neutral
NC_030852.1	3878000	3879000	4	1.64494	0.000351	4	Neutral
NC_030852.1	29561000	29562000	5	0.815588	0.000353	5	Neutral
NC_030852.1	27772000	27773000	6	0.170517	0.000356	6	Neutral
NC_030852.1	35296000	35297000	8	0.0707316	0.000357	8	Neutral
NC_030852.1	24991000	24992000	6	0.621884	0.000358	6	Neutral
NC_030852.1	14352000	14353000	4	1.24071	0.000358	4	Neutral
NC_030852.1	12623000	12624000	3	2.41013	0.000359	3	Balancing selection (D > 95th percentile)
NC_030852.1	27423000	27424000	6	0.584994	0.000362	6	Neutral
NC_030852.1	34049000	34050000	3	1.88589	0.000364	3	Balancing selection (D > 95th percentile)
NC_030852.1	26897000	26898000	12	-0.899439	0.000367	12	Neutral
NC_030852.1	484000	485000	7	-0.179466	0.000367	7	Neutral
NC_030852.1	30464000	30465000	6	0.349497	0.00037	6	Neutral
NC_030852.1	25819000	25820000	10	-0.625373	0.000372	10	Neutral
NC_030852.1	33521000	33522000	9	-0.568781	0.000372	9	Neutral
NC_030852.1	25236000	25237000	9	-0.582669	0.000374	9	Neutral
NC_030852.1	35813000	35814000	6	0.479643	0.000375	6	Neutral
NC_030852.1	24992000	24993000	5	0.859194	0.000375	5	Neutral
NC_030852.1	27658000	27659000	8	-0.189945	0.000378	8	Neutral
NC_030852.1	30267000	30268000	10	-0.778005	0.000381	10	Neutral
NC_030852.1	23697000	23698000	11	-0.462682	0.000384	11	Neutral
NC_030852.1	30106000	30107000	6	1.07413	0.000387	6	Neutral
NC_030852.1	938000	939000	6	0.6605	0.000388	6	Neutral
NC_030852.1	143000	144000	7	0.29275	0.00039	7	Neutral
NC_030852.1	29898000	29899000	9	-0.26466	0.000392	9	Neutral
NC_030852.1	32843000	32844000	6	0.0573888	0.000395	6	Neutral
NC_030852.1	29280000	29281000	7	0.632716	0.000397	7	Neutral
NC_030852.1	29630000	29631000	9	-0.357393	0.000402	9	Neutral
NC_030852.1	4246000	4247000	6	0.137222	0.000402	6	Neutral
NC_030852.1	2483000	2484000	4	1.40125	0.000402	4	Neutral
NC_030852.1	36236000	36237000	5	0.92512	0.000404	5	Neutral
NC_030852.1	20865000	20866000	10	-0.17779	0.000409	10	Neutral
NC_030852.1	29434000	29435000	10	-0.866709	0.000414	10	Neutral
NC_030852.1	25504000	25505000	5	1.03921	0.000421	5	Neutral
NC_030852.1	29413000	29414000	9	0.0788548	0.000423	9	Neutral
NC_030852.1	8089000	8090000	10	-0.414684	0.000426	10	Neutral
NC_030852.1	25094000	25095000	8	0.218929	0.000428	8	Neutral
NC_030852.1	34887000	34888000	7	0.607026	0.00043	7	Neutral
NC_030852.1	36089000	36090000	2	1.49905	0.000431	2	Neutral
NC_030852.1	32009000	32010000	7	0.480496	0.000432	7	Neutral
NC_030852.1	5305000	5306000	13	-0.82685	0.000438	13	Neutral
NC_030852.1	24888000	24889000	7	1.04232	0.000439	7	Neutral
NC_030852.1	22697000	22698000	5	1.05741	0.000439	5	Neutral
NC_030852.1	25146000	25147000	8	0.05295	0.000445	8	Neutral
NC_030852.1	35436000	35437000	4	1.88414	0.000449	4	Balancing selection (D > 95th percentile)
NC_030852.1	17164000	17165000	4	1.33926	0.000452	4	Neutral
NC_030852.1	27657000	27658000	6	0.810614	0.000453	6	Neutral
NC_030852.1	30066000	30067000	3	1.96886	0.000453	3	Balancing selection (D > 95th percentile)
NC_030852.1	30273000	30274000	6	2.44031	0.000454	6	Balancing selection (D > 95th percentile)
NC_030852.1	25857000	25858000	11	-0.412643	0.000459	11	Neutral
NC_030852.1	25402000	25403000	4	1.19656	0.000461	4	Neutral
NC_030852.1	34624000	34625000	9	-0.38352	0.000466	9	Neutral
NC_030852.1	24916000	24917000	18	-0.265526	0.000466	18	Neutral
NC_030852.1	35480000	35481000	7	0.777802	0.00047	7	Neutral
NC_030852.1	35804000	35805000	4	1.34337	0.000472	4	Neutral
NC_030852.1	14452000	14453000	10	-0.169058	0.000475	10	Neutral
NC_030852.1	23842000	23843000	6	0.925073	0.000475	6	Neutral
NC_030852.1	33042000	33043000	12	-0.40086	0.000482	12	Neutral
NC_030852.1	27790000	27791000	6	0.906613	0.000487	6	Neutral
NC_030852.1	30430000	30431000	7	0.743606	0.000491	7	Neutral
NC_030852.1	35848000	35849000	7	0.858965	0.000498	7	Neutral
NC_030852.1	144000	145000	9	0.420553	0.0005	9	Neutral
NC_030852.1	32110000	32111000	5	1.71945	0.000504	5	Balancing selection (D > 95th percentile)
NC_030852.1	35586000	35587000	3	2.40457	0.000507	3	Balancing selection (D > 95th percentile)
NC_030852.1	3028000	3029000	8	-0.0341334	0.000512	8	Neutral
NC_030852.1	30231000	30232000	12	-0.283784	0.000516	12	Neutral
NC_030852.1	29459000	29460000	20	-1.31573	0.000527	20	Positive selection (D < 5th percentile)
NC_030852.1	29868000	29869000	8	0.566453	0.000533	8	Neutral
NC_030852.1	27296000	27297000	5	1.75102	0.000537	5	Balancing selection (D > 95th percentile)
NC_030852.1	3025000	3026000	12	-0.330492	0.000538	12	Neutral
NC_030852.1	33047000	33048000	14	-0.558146	0.000541	14	Neutral
NC_030852.1	32020000	32021000	3	1.64863	0.000542	3	Neutral
NC_030852.1	32923000	32924000	11	0.0284463	0.000548	11	Neutral
NC_030852.1	1876000	1877000	14	-0.472469	0.000561	14	Neutral
NC_030852.1	29932000	29933000	14	-0.538142	0.000566	14	Neutral
NC_030852.1	27393000	27394000	12	0.0549185	0.000569	12	Neutral
NC_030852.1	33538000	33539000	4	2.87158	0.000571	4	Balancing selection (D > 95th percentile)
NC_030852.1	17165000	17166000	7	1.37774	0.000572	7	Neutral
NC_030852.1	27538000	27539000	12	-0.194088	0.000596	12	Neutral
NC_030852.1	1499000	1500000	11	-0.277582	0.000603	11	Neutral
NC_030852.1	33588000	33589000	12	-0.172286	0.000604	12	Neutral
NC_030852.1	1805000	1806000	11	-0.184701	0.000617	11	Neutral
NC_030852.1	30094000	30095000	11	0.104245	0.000617	11	Neutral
NC_030852.1	497000	498000	9	0.807705	0.000624	9	Neutral
NC_030852.1	3346000	3347000	14	-0.0821273	0.000627	14	Neutral
NC_030852.1	28268000	28269000	9	0.695463	0.000643	9	Neutral
NC_030852.1	31960000	31961000	3	1.188	0.000651	3	Neutral
NC_030852.1	33195000	33196000	18	-1.09011	0.000664	18	Neutral
NC_030852.1	28177000	28178000	8	1.0838	0.000669	8	Neutral
NC_030852.1	20959000	20960000	11	0.297314	0.000671	11	Neutral
NC_030852.1	32970000	32971000	13	-0.15711	0.000679	13	Neutral
NC_030852.1	1498000	1499000	19	-1.32674	0.00068	19	Positive selection (D < 5th percentile)
NC_030852.1	31536000	31537000	11	0.442808	0.000686	11	Neutral
NC_030852.1	8088000	8089000	12	0.0999581	0.000699	12	Neutral
NC_030852.1	23698000	23699000	12	0.115424	0.000699	12	Neutral
NC_030852.1	25290000	25291000	9	0.216092	0.000704	9	Neutral
NC_030852.1	34853000	34854000	20	-0.618698	0.000709	20	Neutral
NC_030852.1	29433000	29434000	16	-1.23852	0.00071	16	Positive selection (D < 5th percentile)
NC_030852.1	24827000	24828000	17	-0.119412	0.00072	17	Neutral
NC_030852.1	4968000	4969000	7	1.89862	0.000721	7	Balancing selection (D > 95th percentile)
NC_030852.1	32793000	32794000	11	0.307762	0.00073	11	Neutral
NC_030852.1	28790000	28791000	8	1.45509	0.000732	8	Neutral
NC_030852.1	31892000	31893000	6	0.425111	0.000737	6	Neutral
NC_030852.1	31532000	31533000	11	0.815483	0.000741	11	Neutral
NC_030852.1	23274000	23275000	14	0.035275	0.00075	14	Neutral
NC_030852.1	22696000	22697000	10	0.729085	0.00075	10	Neutral
NC_030852.1	30088000	30089000	9	1.30099	0.00076	9	Neutral
NC_030852.1	21782000	21783000	10	1.32437	0.000769	10	Neutral
NC_030852.1	29479000	29480000	16	-0.243008	0.000772	16	Neutral
NC_030852.1	35990000	35991000	12	0.821631	0.000784	12	Neutral
NC_030852.1	18592000	18593000	14	-0.0241618	0.000787	14	Neutral
NC_030852.1	35618000	35619000	13	0.395374	0.000788	13	Neutral
NC_030852.1	30089000	30090000	16	-0.0525173	0.000791	16	Neutral
NC_030852.1	29931000	29932000	15	0.0538286	0.000805	15	Neutral
NC_030852.1	27580000	27581000	13	0.0319669	0.000807	13	Neutral
NC_030852.1	3345000	3346000	18	0.136926	0.000828	18	Neutral
NC_030852.1	3026000	3027000	17	-0.577094	0.000837	17	Neutral
NC_030852.1	29420000	29421000	8	1.11197	0.000841	8	Neutral
NC_030852.1	28786000	28787000	10	1.74687	0.000848	10	Balancing selection (D > 95th percentile)
NC_030852.1	29754000	29755000	11	0.534014	0.000883	11	Neutral
NC_030852.1	32276000	32277000	9	0.67277	0.000912	9	Neutral
NC_030852.1	1672000	1673000	13	0.967228	0.000933	13	Neutral
NC_030852.1	33357000	33358000	14	0.620262	0.000964	14	Neutral
NC_030852.1	33908000	33909000	9	1.81112	0.000965	9	Balancing selection (D > 95th percentile)
NC_030852.1	29425000	29426000	21	-0.324971	0.000977	21	Neutral
NC_030852.1	33223000	33224000	13	1.49255	0.00104485	13	Neutral
NC_030852.1	17167000	17168000	14	1.21821	0.00105907	14	Neutral
NC_030852.1	35803000	35804000	13	1.69054	0.00108863	13	Neutral
NC_030852.1	26723000	26724000	17	0.596087	0.00110112	17	Neutral
NC_030852.1	3027000	3028000	15	0.491832	0.00114631	15	Neutral
NC_030852.1	2341000	2342000	19	0.682229	0.00119951	19	Neutral
NC_030852.1	29480000	29481000	19	0.297524	0.00120978	19	Neutral
NC_030852.1	29410000	29411000	32	-0.793324	0.00123515	32	Neutral
NC_030852.1	33126000	33127000	24	-0.359164	0.00133664	24	Neutral
NC_030852.1	5665000	5666000	12	2.29502	0.00135001	12	Balancing selection (D > 95th percentile)
NC_030852.1	17166000	17167000	19	0.736913	0.00137759	19	Neutral
NC_030852.1	31537000	31538000	17	1.49971	0.00139474	17	Neutral
NC_030852.1	5666000	5667000	30	-0.566225	0.00141575	30	Neutral
NC_030852.1	31893000	31894000	10	0.455441	0.00145784	10	Neutral
NC_030852.1	29421000	29422000	35	-0.800184	0.00159754	35	Neutral
NC_030852.1	31937000	31938000	14	0.221509	0.00163966	14	Neutral
NC_030852.1	33899000	33900000	22	2.30416	0.00179208	22	Balancing selection (D > 95th percentile)
NC_030852.1	24673000	24674000	23	1.16376	0.00208732	23	Neutral
NC_030852.1	29232000	29233000	23	1.66838	0.00248195	23	Neutral
NC_030853.1	16188000	16189000	1	-0.885726	4.37e-06	1	Neutral
NC_030853.1	533000	534000	1	-0.88763	4.45e-06	1	Neutral
NC_030853.1	15346000	15347000	1	-0.891244	4.61e-06	1	Neutral
NC_030853.1	838000	839000	1	-0.894619	4.77e-06	1	Neutral
NC_030853.1	2874000	2875000	1	-0.894619	4.77e-06	1	Neutral
NC_030853.1	3844000	3845000	1	-0.896224	4.85e-06	1	Neutral
NC_030853.1	7991000	7992000	1	-0.616477	1.07e-05	1	Neutral
NC_030853.1	2652000	2653000	1	-0.664796	1.24e-05	1	Neutral
NC_030853.1	1473000	1474000	1	-0.676408	1.29e-05	1	Neutral
NC_030853.1	442000	443000	1	-0.5066	1.44e-05	1	Neutral
NC_030853.1	15626000	15627000	2	-1.05138	1.7e-05	2	Neutral
NC_030853.1	18164000	18165000	2	-1.04857	1.7e-05	2	Neutral
NC_030853.1	15383000	15384000	2	-1.06974	1.82e-05	2	Neutral
NC_030853.1	929000	930000	2	-1.07538	1.86e-05	2	Neutral
NC_030853.1	1806000	1807000	2	-1.07862	1.88e-05	2	Neutral
NC_030853.1	17433000	17434000	1	-0.62612	1.96e-05	1	Neutral
NC_030853.1	2733000	2734000	2	-1.0037	2.26e-05	2	Neutral
NC_030853.1	872000	873000	2	-1.00297	2.28e-05	2	Neutral
NC_030853.1	12696000	12697000	1	-0.523785	2.34e-05	1	Neutral
NC_030853.1	9302000	9303000	1	-0.377241	2.5e-05	1	Neutral
NC_030853.1	2209000	2210000	2	-0.94494	2.74e-05	2	Neutral
NC_030853.1	1041000	1042000	2	-0.885673	3.25e-05	2	Neutral
NC_030853.1	2626000	2627000	3	-1.32131	3.43e-05	3	Positive selection (D < 5th percentile)
NC_030853.1	3247000	3248000	1	-0.410081	3.62e-05	1	Neutral
NC_030853.1	986000	987000	3	-1.06737	3.77e-05	3	Neutral
NC_030853.1	18339000	18340000	1	-0.12463	3.79e-05	1	Neutral
NC_030853.1	2404000	2405000	4	-1.34196	3.87e-05	4	Positive selection (D < 5th percentile)
NC_030853.1	16200000	16201000	1	-0.164529	4e-05	1	Neutral
NC_030853.1	2981000	2982000	2	-0.876676	4.18e-05	2	Neutral
NC_030853.1	6457000	6458000	1	0.167776	4.71e-05	1	Neutral
NC_030853.1	1299000	1300000	6	-1.61174	4.81e-05	6	Positive selection (D < 5th percentile)
NC_030853.1	9593000	9594000	1	0.3984	5.05e-05	1	Neutral
NC_030853.1	2987000	2988000	2	-0.506333	5.63e-05	2	Neutral
NC_030853.1	3709000	3710000	1	0.0076504	5.67e-05	1	Neutral
NC_030853.1	12700000	12701000	1	0.0076504	5.67e-05	1	Neutral
NC_030853.1	16066000	16067000	2	-0.367955	5.78e-05	2	Neutral
NC_030853.1	1835000	1836000	2	-0.554011	6.07e-05	2	Neutral
NC_030853.1	3132000	3133000	2	-0.662909	6.22e-05	2	Neutral
NC_030853.1	16640000	16641000	2	-0.358716	6.46e-05	2	Neutral
NC_030853.1	16306000	16307000	1	-0.459585	6.6e-05	1	Neutral
NC_030853.1	16205000	16206000	1	0.764243	6.62e-05	1	Neutral
NC_030853.1	465000	466000	4	-1.04798	6.89e-05	4	Neutral
NC_030853.1	326000	327000	3	-0.773287	6.93e-05	3	Neutral
NC_030853.1	16258000	16259000	2	-0.155553	6.98e-05	2	Neutral
NC_030853.1	16526000	16527000	2	-0.219047	7.12e-05	2	Neutral
NC_030853.1	10893000	10894000	3	-0.606342	7.47e-05	3	Neutral
NC_030853.1	6458000	6459000	5	-1.16175	8.13e-05	5	Positive selection (D < 5th percentile)
NC_030853.1	2238000	2239000	2	-0.288236	8.36e-05	2	Neutral
NC_030853.1	1254000	1255000	1	1.27461	8.55e-05	1	Neutral
NC_030853.1	8009000	8010000	2	-0.107914	8.8e-05	2	Neutral
NC_030853.1	692000	693000	12	-1.88431	9.44e-05	12	Positive selection (D < 5th percentile)
NC_030853.1	487000	488000	2	0.205135	9.66e-05	2	Neutral
NC_030853.1	15684000	15685000	2	0.351432	0.0001	2	Neutral
NC_030853.1	927000	928000	4	-0.828185	0.000106	4	Neutral
NC_030853.1	16849000	16850000	2	0.472837	0.00011	2	Neutral
NC_030853.1	678000	679000	1	0.628293	0.00011	1	Neutral
NC_030853.1	2388000	2389000	1	1.84589	0.000111	1	Balancing selection (D > 95th percentile)
NC_030853.1	15345000	15346000	4	-0.870649	0.000113	4	Neutral
NC_030853.1	2211000	2212000	2	0.225423	0.000113	2	Neutral
NC_030853.1	4375000	4376000	1	1.00329	0.000117	1	Neutral
NC_030853.1	11290000	11291000	3	-0.08882	0.00012	3	Neutral
NC_030853.1	609000	610000	3	-0.316549	0.000127	3	Neutral
NC_030853.1	3598000	3599000	1	1.69388	0.00013	1	Neutral
NC_030853.1	2504000	2505000	1	1.80033	0.00013	1	Balancing selection (D > 95th percentile)
NC_030853.1	1325000	1326000	3	-0.112577	0.000134	3	Neutral
NC_030853.1	327000	328000	3	-0.312039	0.000135	3	Neutral
NC_030853.1	2402000	2403000	3	-0.183072	0.000136	3	Neutral
NC_030853.1	3407000	3408000	3	0.000774	0.000136	3	Neutral
NC_030853.1	16525000	16526000	2	0.6817	0.000136	2	Neutral
NC_030853.1	12666000	12667000	1	1.65074	0.000136	1	Neutral
NC_030853.1	15382000	15383000	2	0.448795	0.000137	2	Neutral
NC_030853.1	13093000	13094000	5	-0.817652	0.000139	5	Neutral
NC_030853.1	2394000	2395000	4	-0.399676	0.000141	4	Neutral
NC_030853.1	12360000	12361000	2	0.249629	0.000141	2	Neutral
NC_030853.1	677000	678000	1	1.74957	0.000146	1	Balancing selection (D > 95th percentile)
NC_030853.1	1292000	1293000	3	-0.0102891	0.000147	3	Neutral
NC_030853.1	1734000	1735000	1	1.37266	0.000147	1	Neutral
NC_030853.1	2125000	2126000	2	0.747924	0.000159	2	Neutral
NC_030853.1	18158000	18159000	2	0.909033	0.000162	2	Neutral
NC_030853.1	3581000	3582000	4	-0.181501	0.000164	4	Neutral
NC_030853.1	1710000	1711000	4	-0.419043	0.000168	4	Neutral
NC_030853.1	1604000	1605000	5	-0.389337	0.000173	5	Neutral
NC_030853.1	3610000	3611000	4	-0.281644	0.000173	4	Neutral
NC_030853.1	59000	60000	1	1.98722	0.000174	1	Balancing selection (D > 95th percentile)
NC_030853.1	6157000	6158000	1	1.74245	0.000175	1	Balancing selection (D > 95th percentile)
NC_030853.1	4982000	4983000	5	-0.371317	0.000178	5	Neutral
NC_030853.1	843000	844000	7	-0.94871	0.000182	7	Neutral
NC_030853.1	16561000	16562000	5	-0.69484	0.000182	5	Neutral
NC_030853.1	16274000	16275000	5	-0.468941	0.000183	5	Neutral
NC_030853.1	12441000	12442000	2	1.54863	0.000185	2	Neutral
NC_030853.1	18215000	18216000	3	0.366585	0.000188	3	Neutral
NC_030853.1	2503000	2504000	6	0.671899	0.000189	6	Neutral
NC_030853.1	15415000	15416000	7	-0.69271	0.000199	7	Neutral
NC_030853.1	31000	32000	3	0.436598	0.000202	3	Neutral
NC_030853.1	7721000	7722000	1	1.83141	0.000202	1	Balancing selection (D > 95th percentile)
NC_030853.1	11589000	11590000	5	0.0488522	0.000205	5	Neutral
NC_030853.1	16619000	16620000	4	-0.365978	0.000208	4	Neutral
NC_030853.1	2387000	2388000	4	0.57272	0.000211	4	Neutral
NC_030853.1	2210000	2211000	5	-0.211282	0.000215	5	Neutral
NC_030853.1	16973000	16974000	3	0.71303	0.000217	3	Neutral
NC_030853.1	2391000	2392000	2	0.855775	0.000217	2	Neutral
NC_030853.1	15685000	15686000	3	0.687622	0.000218	3	Neutral
NC_030853.1	717000	718000	2	1.23505	0.000218	2	Neutral
NC_030853.1	325000	326000	5	-0.219292	0.000226	5	Neutral
NC_030853.1	15272000	15273000	2	1.4595	0.000229	2	Neutral
NC_030853.1	11954000	11955000	8	-0.607744	0.000232	8	Neutral
NC_030853.1	16976000	16977000	3	0.517076	0.000233	3	Neutral
NC_030853.1	16598000	16599000	4	0.253207	0.000234	4	Neutral
NC_030853.1	2401000	2402000	7	-0.658075	0.000237	7	Neutral
NC_030853.1	1676000	1677000	7	-0.473311	0.000241	7	Neutral
NC_030853.1	11588000	11589000	7	-0.368643	0.000243	7	Neutral
NC_030853.1	16275000	16276000	3	0.675198	0.000243	3	Neutral
NC_030853.1	14513000	14514000	4	0.594148	0.000246	4	Neutral
NC_030853.1	6158000	6159000	3	-0.41121	0.000252	3	Neutral
NC_030853.1	16974000	16975000	12	-1.24177	0.000262	12	Positive selection (D < 5th percentile)
NC_030853.1	3770000	3771000	10	-0.930792	0.000262	10	Neutral
NC_030853.1	4376000	4377000	7	-0.734734	0.000264	7	Neutral
NC_030853.1	563000	564000	4	0.730733	0.000264	4	Neutral
NC_030853.1	2378000	2379000	7	-0.404275	0.000278	7	Neutral
NC_030853.1	2124000	2125000	5	0.439135	0.000282	5	Neutral
NC_030853.1	1701000	1702000	2	1.47514	0.000298	2	Neutral
NC_030853.1	16588000	16589000	7	-0.167902	0.000299	7	Neutral
NC_030853.1	3609000	3610000	6	0.0870896	0.000309	6	Neutral
NC_030853.1	3005000	3006000	7	-0.288141	0.000321	7	Neutral
NC_030853.1	1180000	1181000	6	-0.0252262	0.000328	6	Neutral
NC_030853.1	2219000	2220000	5	0.738444	0.000332	5	Neutral
NC_030853.1	16597000	16598000	4	1.05634	0.000345	4	Neutral
NC_030853.1	507000	508000	6	0.481765	0.00036	6	Neutral
NC_030853.1	1389000	1390000	8	-0.142694	0.000369	8	Neutral
NC_030853.1	16587000	16588000	6	0.846708	0.000391	6	Neutral
NC_030853.1	16107000	16108000	4	1.5838	0.000401	4	Neutral
NC_030853.1	12951000	12952000	4	1.56616	0.00041	4	Neutral
NC_030853.1	14561000	14562000	4	1.92289	0.00041	4	Balancing selection (D > 95th percentile)
NC_030853.1	599000	600000	4	0.931176	0.000417	4	Neutral
NC_030853.1	16975000	16976000	6	0.359155	0.000421	6	Neutral
NC_030853.1	16307000	16308000	3	0.14183	0.000441	3	Neutral
NC_030853.1	16206000	16207000	5	0.852927	0.000445	5	Neutral
NC_030853.1	3815000	3816000	13	-0.662884	0.000452	13	Neutral
NC_030853.1	9293000	9294000	9	-0.196413	0.000472	9	Neutral
NC_030853.1	3958000	3959000	10	-0.171791	0.000472	10	Neutral
NC_030853.1	8037000	8038000	9	-0.369135	0.000516	9	Neutral
NC_030853.1	2835000	2836000	6	0.945	0.000526	6	Neutral
NC_030853.1	2390000	2391000	4	2.06806	0.000534	4	Balancing selection (D > 95th percentile)
NC_030853.1	3341000	3342000	8	0.755526	0.000568	8	Neutral
NC_030853.1	3769000	3770000	16	-0.687986	0.000602	16	Neutral
NC_030853.1	11953000	11954000	6	0.846183	0.000615	6	Neutral
NC_030853.1	9292000	9293000	14	-0.440652	0.000621	14	Neutral
NC_030853.1	434000	435000	9	0.672493	0.000629	9	Neutral
NC_030853.1	2218000	2219000	10	0.28077	0.000661	10	Neutral
NC_030853.1	1059000	1060000	18	-0.720752	0.000676	18	Neutral
NC_030853.1	2381000	2382000	8	2.1328	0.000757	8	Balancing selection (D > 95th percentile)
NC_030853.1	1632000	1633000	6	2.50436	0.000768	6	Balancing selection (D > 95th percentile)
NC_030853.1	9303000	9304000	14	0.00520569	0.000788	14	Neutral
NC_030853.1	253000	254000	25	-0.744843	0.000837	25	Neutral
NC_030853.1	673000	674000	8	0.250714	0.000861	8	Neutral
NC_030853.1	1633000	1634000	13	0.0669125	0.000976	13	Neutral
NC_030853.1	928000	929000	22	-0.226909	0.000978	22	Neutral
NC_030853.1	600000	601000	12	0.531394	0.000997	12	Neutral
NC_030853.1	17424000	17425000	42	-0.645057	0.00110586	42	Neutral
NC_030853.1	1392000	1393000	16	0.485317	0.00111225	16	Neutral
NC_030853.1	1391000	1392000	17	0.994885	0.00142756	17	Neutral
NC_030853.1	1390000	1391000	15	1.06228	0.00161792	15	Neutral
NC_030854.1	694000	695000	1	-0.474988	8.42e-07	1	Neutral
NC_030854.1	38999000	39000000	1	-0.877369	4.05e-06	1	Neutral
NC_030854.1	541000	542000	1	-0.881703	4.21e-06	1	Neutral
NC_030854.1	1187000	1188000	1	-0.881703	4.21e-06	1	Neutral
NC_030854.1	360000	361000	1	-0.883752	4.29e-06	1	Neutral
NC_030854.1	2732000	2733000	1	-0.88763	4.45e-06	1	Neutral
NC_030854.1	28917000	28918000	1	-0.88763	4.45e-06	1	Neutral
NC_030854.1	30815000	30816000	1	-0.88763	4.45e-06	1	Neutral
NC_030854.1	37432000	37433000	1	-0.88763	4.45e-06	1	Neutral
NC_030854.1	38410000	38411000	1	-0.88763	4.45e-06	1	Neutral
NC_030854.1	38431000	38432000	1	-0.88763	4.45e-06	1	Neutral
NC_030854.1	38801000	38802000	1	-0.88763	4.45e-06	1	Neutral
NC_030854.1	31864000	31865000	1	-0.889469	4.53e-06	1	Neutral
NC_030854.1	36974000	36975000	1	-0.889469	4.53e-06	1	Neutral
NC_030854.1	36654000	36655000	1	-0.891244	4.61e-06	1	Neutral
NC_030854.1	38987000	38988000	1	-0.894619	4.77e-06	1	Neutral
NC_030854.1	28348000	28349000	1	-0.896224	4.85e-06	1	Neutral
NC_030854.1	39249000	39250000	1	-0.902154	5.17e-06	1	Neutral
NC_030854.1	35523000	35524000	1	-0.917255	6.21e-06	1	Neutral
NC_030854.1	1565000	1566000	1	-0.709065	6.41e-06	1	Neutral
NC_030854.1	28895000	28896000	1	-0.768017	8.17e-06	1	Neutral
NC_030854.1	34845000	34846000	1	-0.772186	8.33e-06	1	Neutral
NC_030854.1	36817000	36818000	2	-1.19428	8.74e-06	2	Positive selection (D < 5th percentile)
NC_030854.1	510000	511000	1	-0.783819	8.82e-06	1	Neutral
NC_030854.1	33171000	33172000	2	-1.19902	8.9e-06	2	Positive selection (D < 5th percentile)
NC_030854.1	1617000	1618000	2	-1.2028	9.14e-06	2	Positive selection (D < 5th percentile)
NC_030854.1	36803000	36804000	1	-0.794289	9.3e-06	1	Neutral
NC_030854.1	28635000	28636000	1	-0.800706	9.62e-06	1	Neutral
NC_030854.1	29164000	29165000	1	-0.800706	9.62e-06	1	Neutral
NC_030854.1	38211000	38212000	1	-0.803763	9.78e-06	1	Neutral
NC_030854.1	24569000	24570000	1	-0.809593	1.01e-05	1	Neutral
NC_030854.1	13439000	13440000	2	-1.08663	1.11e-05	2	Neutral
NC_030854.1	30622000	30623000	2	-1.23546	1.27e-05	2	Positive selection (D < 5th percentile)
NC_030854.1	36953000	36954000	2	-1.12482	1.3e-05	2	Neutral
NC_030854.1	502000	503000	1	-0.687228	1.33e-05	1	Neutral
NC_030854.1	5037000	5038000	3	-1.40844	1.34e-05	3	Positive selection (D < 5th percentile)
NC_030854.1	21624000	21625000	3	-1.40844	1.34e-05	3	Positive selection (D < 5th percentile)
NC_030854.1	39063000	39064000	3	-1.41863	1.42e-05	3	Positive selection (D < 5th percentile)
NC_030854.1	38734000	38735000	2	-1.14196	1.42e-05	2	Neutral
NC_030854.1	6357000	6358000	2	-1.14499	1.44e-05	2	Neutral
NC_030854.1	38707000	38708000	1	-0.715669	1.48e-05	1	Neutral
NC_030854.1	37955000	37956000	1	-0.719903	1.5e-05	1	Neutral
NC_030854.1	25923000	25924000	1	-0.574711	1.7e-05	1	Neutral
NC_030854.1	32150000	32151000	1	-0.581909	1.73e-05	1	Neutral
NC_030854.1	29701000	29702000	1	-0.588865	1.76e-05	1	Neutral
NC_030854.1	36014000	36015000	1	-0.588865	1.76e-05	1	Neutral
NC_030854.1	38961000	38962000	2	-1.07066	1.83e-05	2	Neutral
NC_030854.1	34904000	34905000	1	-0.602094	1.83e-05	1	Neutral
NC_030854.1	139000	140000	1	-0.614487	1.89e-05	1	Neutral
NC_030854.1	3048000	3049000	1	-0.614487	1.89e-05	1	Neutral
NC_030854.1	37990000	37991000	1	-0.425868	1.9e-05	1	Neutral
NC_030854.1	2589000	2590000	1	-0.620394	1.92e-05	1	Neutral
NC_030854.1	31976000	31977000	2	-1.0879	1.97e-05	2	Neutral
NC_030854.1	2183000	2184000	3	-1.3775	2.01e-05	3	Positive selection (D < 5th percentile)
NC_030854.1	2984000	2985000	1	-0.249982	2.02e-05	1	Neutral
NC_030854.1	1434000	1435000	1	-0.465855	2.06e-05	1	Neutral
NC_030854.1	38390000	38391000	1	-0.465855	2.06e-05	1	Neutral
NC_030854.1	36981000	36982000	1	-0.516299	2.3e-05	1	Neutral
NC_030854.1	1656000	1657000	3	-1.31464	2.34e-05	3	Positive selection (D < 5th percentile)
NC_030854.1	24107000	24108000	1	-0.523785	2.34e-05	1	Neutral
NC_030854.1	25894000	25895000	3	-1.31359	2.35e-05	3	Positive selection (D < 5th percentile)
NC_030854.1	35204000	35205000	3	-1.31418	2.36e-05	3	Positive selection (D < 5th percentile)
NC_030854.1	24411000	24412000	1	-0.343865	2.36e-05	1	Neutral
NC_030854.1	37369000	37370000	1	-0.377241	2.5e-05	1	Neutral
NC_030854.1	35663000	35664000	2	-1.03221	2.51e-05	2	Neutral
NC_030854.1	1437000	1438000	2	-1.04376	2.58e-05	2	Neutral
NC_030854.1	12432000	12433000	1	-0.416764	2.69e-05	1	Neutral
NC_030854.1	39057000	39058000	1	-0.416764	2.69e-05	1	Neutral
NC_030854.1	34274000	34275000	3	-1.25502	2.73e-05	3	Positive selection (D < 5th percentile)
NC_030854.1	4127000	4128000	1	-0.425868	2.74e-05	1	Neutral
NC_030854.1	9392000	9393000	1	-0.256499	2.78e-05	1	Neutral
NC_030854.1	1271000	1272000	2	-0.953423	2.79e-05	2	Neutral
NC_030854.1	35685000	35686000	2	-0.958324	2.83e-05	2	Neutral
NC_030854.1	33728000	33729000	2	-0.818604	2.83e-05	2	Neutral
NC_030854.1	2707000	2708000	1	-0.443241	2.84e-05	1	Neutral
NC_030854.1	16556000	16557000	2	-0.86109	3.06e-05	2	Neutral
NC_030854.1	1755000	1756000	1	-0.315916	3.06e-05	1	Neutral
NC_030854.1	23365000	23366000	1	-0.315916	3.06e-05	1	Neutral
NC_030854.1	9408000	9409000	2	-0.872942	3.08e-05	2	Neutral
NC_030854.1	2846000	2847000	2	-0.773631	3.32e-05	2	Neutral
NC_030854.1	34822000	34823000	2	-0.906886	3.34e-05	2	Neutral
NC_030854.1	2210000	2211000	1	-0.2138	3.4e-05	1	Neutral
NC_030854.1	38384000	38385000	1	-0.2138	3.4e-05	1	Neutral
NC_030854.1	34631000	34632000	1	-0.0651099	3.5e-05	1	Neutral
NC_030854.1	3448000	3449000	1	-0.238298	3.53e-05	1	Neutral
NC_030854.1	37634000	37635000	2	-0.804503	3.59e-05	2	Neutral
NC_030854.1	32164000	32165000	2	-0.830913	3.64e-05	2	Neutral
NC_030854.1	27557000	27558000	2	-0.821948	3.66e-05	2	Neutral
NC_030854.1	34294000	34295000	1	0.0630907	3.69e-05	1	Neutral
NC_030854.1	27171000	27172000	1	-0.11047	3.71e-05	1	Neutral
NC_030854.1	38789000	38790000	1	-0.11047	3.71e-05	1	Neutral
NC_030854.1	1096000	1097000	1	-0.12463	3.79e-05	1	Neutral
NC_030854.1	34844000	34845000	5	-1.51317	3.85e-05	5	Positive selection (D < 5th percentile)
NC_030854.1	20554000	20555000	2	-0.633908	3.88e-05	2	Neutral
NC_030854.1	14252000	14253000	2	-0.751896	3.9e-05	2	Neutral
NC_030854.1	6744000	6745000	1	0.0104247	3.93e-05	1	Neutral
NC_030854.1	26003000	26004000	1	-0.455015	3.95e-05	1	Neutral
NC_030854.1	27084000	27085000	2	-0.739674	3.98e-05	2	Neutral
NC_030854.1	38422000	38423000	2	-0.622342	4.02e-05	2	Neutral
NC_030854.1	958000	959000	3	-1.02908	4.09e-05	3	Neutral
NC_030854.1	10430000	10431000	2	-0.756147	4.14e-05	2	Neutral
NC_030854.1	37615000	37616000	2	-0.883042	4.19e-05	2	Neutral
NC_030854.1	31836000	31837000	1	0.0995351	4.28e-05	1	Neutral
NC_030854.1	33693000	33694000	1	-0.212392	4.29e-05	1	Neutral
NC_030854.1	28690000	28691000	1	-0.0807341	4.41e-05	1	Neutral
NC_030854.1	64000	65000	2	-0.791124	4.43e-05	2	Neutral
NC_030854.1	24154000	24155000	3	-0.954134	4.51e-05	3	Neutral
NC_030854.1	27087000	27088000	1	0.0321217	4.63e-05	1	Neutral
NC_030854.1	34788000	34789000	3	-0.993107	4.69e-05	3	Neutral
NC_030854.1	38495000	38496000	4	-1.3256	4.7e-05	4	Positive selection (D < 5th percentile)
NC_030854.1	6109000	6110000	2	-0.747795	4.77e-05	2	Neutral
NC_030854.1	1679000	1680000	1	0.29215	4.84e-05	1	Neutral
NC_030854.1	34903000	34904000	1	0.131849	4.9e-05	1	Neutral
NC_030854.1	19109000	19110000	2	-0.635274	4.94e-05	2	Neutral
NC_030854.1	38806000	38807000	2	-0.502054	5.31e-05	2	Neutral
NC_030854.1	32419000	32420000	1	-0.0807341	5.33e-05	1	Neutral
NC_030854.1	37175000	37176000	6	-1.52736	5.51e-05	6	Positive selection (D < 5th percentile)
NC_030854.1	937000	938000	1	0.160693	5.57e-05	1	Neutral
NC_030854.1	23855000	23856000	4	-1.1695	5.63e-05	4	Positive selection (D < 5th percentile)
NC_030854.1	33742000	33743000	2	-0.369429	5.66e-05	2	Neutral
NC_030854.1	936000	937000	1	0.0076504	5.67e-05	1	Neutral
NC_030854.1	29226000	29227000	2	-0.361325	5.73e-05	2	Neutral
NC_030854.1	2271000	2272000	3	-0.952782	6e-05	3	Neutral
NC_030854.1	941000	942000	1	0.0818769	6.09e-05	1	Neutral
NC_030854.1	36359000	36360000	3	-0.75241	6.18e-05	3	Neutral
NC_030854.1	38322000	38323000	1	0.0673684	6.2e-05	1	Neutral
NC_030854.1	35375000	35376000	2	-0.440759	6.22e-05	2	Neutral
NC_030854.1	412000	413000	4	-1.16039	6.58e-05	4	Neutral
NC_030854.1	32232000	32233000	6	-1.61031	6.6e-05	6	Positive selection (D < 5th percentile)
NC_030854.1	35414000	35415000	1	0.139363	6.62e-05	1	Neutral
NC_030854.1	2643000	2644000	2	-0.559634	6.73e-05	2	Neutral
NC_030854.1	1161000	1162000	1	0.36798	6.8e-05	1	Neutral
NC_030854.1	36123000	36124000	4	-0.949831	6.9e-05	4	Neutral
NC_030854.1	2211000	2212000	2	0.0113262	7.11e-05	2	Neutral
NC_030854.1	32231000	32232000	2	-0.377345	7.15e-05	2	Neutral
NC_030854.1	1394000	1395000	2	-0.515547	7.18e-05	2	Neutral
NC_030854.1	30244000	30245000	2	-0.521352	7.22e-05	2	Neutral
NC_030854.1	12000	13000	4	-1.08718	7.28e-05	4	Neutral
NC_030854.1	35815000	35816000	3	-0.847385	7.34e-05	3	Neutral
NC_030854.1	28289000	28290000	1	0.759073	7.37e-05	1	Neutral
NC_030854.1	2326000	2327000	4	-1.01109	7.54e-05	4	Neutral
NC_030854.1	33140000	33141000	4	-1.14886	7.6e-05	4	Neutral
NC_030854.1	1921000	1922000	1	1.03644	7.65e-05	1	Neutral
NC_030854.1	3129000	3130000	2	-0.0842022	7.69e-05	2	Neutral
NC_030854.1	24108000	24109000	2	-0.104088	7.78e-05	2	Neutral
NC_030854.1	38916000	38917000	3	-0.717212	7.81e-05	3	Neutral
NC_030854.1	38670000	38671000	1	0.347117	7.83e-05	1	Neutral
NC_030854.1	32659000	32660000	1	0.98234	8.02e-05	1	Neutral
NC_030854.1	39070000	39071000	2	-0.361819	8.07e-05	2	Neutral
NC_030854.1	1689000	1690000	2	-0.199864	8.17e-05	2	Neutral
NC_030854.1	1782000	1783000	4	-0.962269	8.2e-05	4	Neutral
NC_030854.1	28178000	28179000	2	-0.13649	8.2e-05	2	Neutral
NC_030854.1	9272000	9273000	2	-0.263451	8.28e-05	2	Neutral
NC_030854.1	19970000	19971000	3	-0.500789	8.31e-05	3	Neutral
NC_030854.1	25831000	25832000	2	-0.215037	8.4e-05	2	Neutral
NC_030854.1	762000	763000	1	0.81877	8.46e-05	1	Neutral
NC_030854.1	36382000	36383000	1	0.795374	8.64e-05	1	Neutral
NC_030854.1	38029000	38030000	2	-0.101344	8.72e-05	2	Neutral
NC_030854.1	32392000	32393000	6	-1.30422	8.76e-05	6	Positive selection (D < 5th percentile)
NC_030854.1	39061000	39062000	3	-0.490763	8.76e-05	3	Neutral
NC_030854.1	38028000	38029000	1	0.772526	8.81e-05	1	Neutral
NC_030854.1	1443000	1444000	2	0.0990624	8.82e-05	2	Neutral
NC_030854.1	1167000	1168000	1	0.329087	8.94e-05	1	Neutral
NC_030854.1	4510000	4511000	1	0.425053	9.06e-05	1	Neutral
NC_030854.1	1511000	1512000	3	-0.72525	9.26e-05	3	Neutral
NC_030854.1	32660000	32661000	3	-0.557444	9.28e-05	3	Neutral
NC_030854.1	32127000	32128000	2	0.663508	9.29e-05	2	Neutral
NC_030854.1	1154000	1155000	2	-0.0950407	9.39e-05	2	Neutral
NC_030854.1	1976000	1977000	1	0.894532	9.42e-05	1	Neutral
NC_030854.1	39148000	39149000	5	-1.1838	9.43e-05	5	Positive selection (D < 5th percentile)
NC_030854.1	10299000	10300000	2	-0.0777701	9.51e-05	2	Neutral
NC_030854.1	27478000	27479000	1	0.686293	9.52e-05	1	Neutral
NC_030854.1	136000	137000	5	-1.26728	9.59e-05	5	Positive selection (D < 5th percentile)
NC_030854.1	35446000	35447000	3	-0.306286	9.78e-05	3	Neutral
NC_030854.1	32005000	32006000	3	-0.298513	9.78e-05	3	Neutral
NC_030854.1	1762000	1763000	5	-1.00027	9.79e-05	5	Neutral
NC_030854.1	1975000	1976000	3	-0.400398	9.8e-05	3	Neutral
NC_030854.1	35976000	35977000	2	0.299317	9.84e-05	2	Neutral
NC_030854.1	35600000	35601000	2	0.179129	9.94e-05	2	Neutral
NC_030854.1	2286000	2287000	1	1.16884	0.000101	1	Neutral
NC_030854.1	1957000	1958000	1	1.2467	0.000101	1	Neutral
NC_030854.1	28083000	28084000	5	-0.986855	0.000104	5	Neutral
NC_030854.1	38279000	38280000	2	-0.299456	0.000104	2	Neutral
NC_030854.1	2233000	2234000	1	1.11928	0.000105	1	Neutral
NC_030854.1	2063000	2064000	2	-0.521702	0.000106	2	Neutral
NC_030854.1	32307000	32308000	2	0.337294	0.000106	2	Neutral
NC_030854.1	22204000	22205000	3	-0.441614	0.000107	3	Neutral
NC_030854.1	10298000	10299000	1	1.01813	0.000107	1	Neutral
NC_030854.1	31994000	31995000	3	-0.240178	0.000109	3	Neutral
NC_030854.1	1846000	1847000	3	-0.183506	0.000109	3	Neutral
NC_030854.1	3610000	3611000	2	-0.0195414	0.00011	2	Neutral
NC_030854.1	36358000	36359000	3	-0.192	0.000111	3	Neutral
NC_030854.1	30205000	30206000	1	0.972595	0.000111	1	Neutral
NC_030854.1	21878000	21879000	8	-1.3735	0.000112	8	Positive selection (D < 5th percentile)
NC_030854.1	3019000	3020000	2	0.171774	0.000115	2	Neutral
NC_030854.1	745000	746000	7	-1.35797	0.000117	7	Positive selection (D < 5th percentile)
NC_030854.1	1458000	1459000	2	0.162082	0.000117	2	Neutral
NC_030854.1	68000	69000	3	-0.374712	0.000118	3	Neutral
NC_030854.1	37173000	37174000	2	0.341299	0.000118	2	Neutral
NC_030854.1	1153000	1154000	2	0.338699	0.000119	2	Neutral
NC_030854.1	2305000	2306000	6	-1.20425	0.00012	6	Positive selection (D < 5th percentile)
NC_030854.1	5601000	5602000	4	-0.64756	0.00012	4	Neutral
NC_030854.1	34507000	34508000	2	0.427993	0.00012	2	Neutral
NC_030854.1	824000	825000	2	0.0863799	0.000121	2	Neutral
NC_030854.1	1126000	1127000	4	-0.558258	0.000122	4	Neutral
NC_030854.1	4050000	4051000	7	-1.26781	0.000124	7	Positive selection (D < 5th percentile)
NC_030854.1	28253000	28254000	4	-0.385897	0.000125	4	Neutral
NC_030854.1	780000	781000	6	-1.01708	0.000126	6	Neutral
NC_030854.1	37409000	37410000	6	-0.70826	0.000126	6	Neutral
NC_030854.1	21901000	21902000	3	-0.0289795	0.000127	3	Neutral
NC_030854.1	34304000	34305000	2	0.625856	0.000127	2	Neutral
NC_030854.1	8925000	8926000	5	-0.719356	0.000128	5	Neutral
NC_030854.1	34926000	34927000	4	-0.638769	0.000128	4	Neutral
NC_030854.1	35380000	35381000	3	0.189183	0.000128	3	Neutral
NC_030854.1	28707000	28708000	4	-0.725614	0.00013	4	Neutral
NC_030854.1	34536000	34537000	5	-0.840548	0.000134	5	Neutral
NC_030854.1	35133000	35134000	1	1.80672	0.000135	1	Balancing selection (D > 95th percentile)
NC_030854.1	34710000	34711000	4	-0.560604	0.000137	4	Neutral
NC_030854.1	1564000	1565000	3	1.66155	0.000137	3	Neutral
NC_030854.1	25479000	25480000	1	1.47804	0.00014	1	Neutral
NC_030854.1	35812000	35813000	8	-1.37344	0.000141	8	Positive selection (D < 5th percentile)
NC_030854.1	451000	452000	1	1.66153	0.000141	1	Neutral
NC_030854.1	30632000	30633000	6	-1.01611	0.000142	6	Neutral
NC_030854.1	1728000	1729000	1	1.55156	0.000144	1	Neutral
NC_030854.1	452000	453000	1	1.72173	0.000145	1	Balancing selection (D > 95th percentile)
NC_030854.1	24043000	24044000	4	-0.624803	0.000147	4	Neutral
NC_030854.1	1664000	1665000	4	-0.456649	0.000147	4	Neutral
NC_030854.1	36971000	36972000	2	0.661967	0.000147	2	Neutral
NC_030854.1	20555000	20556000	1	1.94202	0.000147	1	Balancing selection (D > 95th percentile)
NC_030854.1	1446000	1447000	4	-0.399051	0.000148	4	Neutral
NC_030854.1	2433000	2434000	5	-0.736188	0.000149	5	Neutral
NC_030854.1	38549000	38550000	3	0.165603	0.000149	3	Neutral
NC_030854.1	31987000	31988000	5	-0.865884	0.00015	5	Neutral
NC_030854.1	5170000	5171000	2	0.448467	0.000151	2	Neutral
NC_030854.1	833000	834000	2	0.173495	0.000154	2	Neutral
NC_030854.1	34943000	34944000	3	0.0881076	0.000155	3	Neutral
NC_030854.1	33808000	33809000	3	-0.0400869	0.000158	3	Neutral
NC_030854.1	812000	813000	1	1.71912	0.000158	1	Neutral
NC_030854.1	34283000	34284000	4	-0.193373	0.000159	4	Neutral
NC_030854.1	38430000	38431000	1	1.99038	0.000159	1	Balancing selection (D > 95th percentile)
NC_030854.1	35449000	35450000	7	-0.925906	0.000162	7	Neutral
NC_030854.1	30771000	30772000	4	-0.333039	0.000162	4	Neutral
NC_030854.1	31475000	31476000	2	0.609198	0.000162	2	Neutral
NC_030854.1	38568000	38569000	1	1.62134	0.000162	1	Neutral
NC_030854.1	34374000	34375000	7	-0.961942	0.000163	7	Neutral
NC_030854.1	30623000	30624000	1	1.79523	0.000163	1	Balancing selection (D > 95th percentile)
NC_030854.1	30772000	30773000	3	-0.12492	0.000164	3	Neutral
NC_030854.1	5795000	5796000	2	0.646489	0.000164	2	Neutral
NC_030854.1	2299000	2300000	5	-0.319581	0.000165	5	Neutral
NC_030854.1	10105000	10106000	3	0.278642	0.000165	3	Neutral
NC_030854.1	5842000	5843000	3	-0.0986901	0.000166	3	Neutral
NC_030854.1	39144000	39145000	6	-0.622754	0.000168	6	Neutral
NC_030854.1	19562000	19563000	4	-0.31122	0.000168	4	Neutral
NC_030854.1	726000	727000	2	0.46416	0.000168	2	Neutral
NC_030854.1	22264000	22265000	3	0.197814	0.000171	3	Neutral
NC_030854.1	2684000	2685000	3	0.458135	0.000172	3	Neutral
NC_030854.1	26118000	26119000	3	0.156617	0.000173	3	Neutral
NC_030854.1	35210000	35211000	2	1.09262	0.000173	2	Neutral
NC_030854.1	297000	298000	1	1.88094	0.000173	1	Balancing selection (D > 95th percentile)
NC_030854.1	4300000	4301000	3	0.509052	0.000174	3	Neutral
NC_030854.1	36022000	36023000	2	0.990235	0.000174	2	Neutral
NC_030854.1	38761000	38762000	3	0.338391	0.000175	3	Neutral
NC_030854.1	8874000	8875000	6	-0.700561	0.000177	6	Neutral
NC_030854.1	31992000	31993000	5	-0.428593	0.000178	5	Neutral
NC_030854.1	37859000	37860000	4	-0.192556	0.000179	4	Neutral
NC_030854.1	27565000	27566000	4	-0.23902	0.000181	4	Neutral
NC_030854.1	18684000	18685000	3	0.228442	0.000181	3	Neutral
NC_030854.1	37811000	37812000	7	-0.899766	0.000183	7	Neutral
NC_030854.1	37965000	37966000	7	-0.985401	0.000184	7	Neutral
NC_030854.1	4495000	4496000	6	-0.738412	0.000188	6	Neutral
NC_030854.1	349000	350000	7	-0.971227	0.000189	7	Neutral
NC_030854.1	2978000	2979000	3	0.108667	0.000189	3	Neutral
NC_030854.1	1629000	1630000	2	0.983407	0.000189	2	Neutral
NC_030854.1	38811000	38812000	7	-0.786465	0.00019	7	Neutral
NC_030854.1	2457000	2458000	3	0.776517	0.00019	3	Neutral
NC_030854.1	30245000	30246000	4	-0.213988	0.000192	4	Neutral
NC_030854.1	37742000	37743000	4	-0.293285	0.000193	4	Neutral
NC_030854.1	3447000	3448000	5	-0.422395	0.000194	5	Neutral
NC_030854.1	807000	808000	5	-0.397802	0.000195	5	Neutral
NC_030854.1	34541000	34542000	7	-0.765474	0.000196	7	Neutral
NC_030854.1	35576000	35577000	4	-0.188317	0.000197	4	Neutral
NC_030854.1	33846000	33847000	4	0.204075	0.000198	4	Neutral
NC_030854.1	2856000	2857000	7	-0.809098	0.000199	7	Neutral
NC_030854.1	38023000	38024000	4	0.0195332	0.000199	4	Neutral
NC_030854.1	25895000	25896000	9	-1.16753	0.000206	9	Positive selection (D < 5th percentile)
NC_030854.1	1916000	1917000	5	-0.201711	0.000206	5	Neutral
NC_030854.1	1132000	1133000	3	0.435155	0.000206	3	Neutral
NC_030854.1	8182000	8183000	4	-0.0421748	0.000207	4	Neutral
NC_030854.1	35597000	35598000	6	-0.596257	0.000209	6	Neutral
NC_030854.1	3510000	3511000	2	1.09309	0.000212	2	Neutral
NC_030854.1	34935000	34936000	5	-0.088884	0.000213	5	Neutral
NC_030854.1	2614000	2615000	4	0.065686	0.000215	4	Neutral
NC_030854.1	22415000	22416000	3	0.343331	0.000215	3	Neutral
NC_030854.1	34610000	34611000	10	-1.06569	0.000218	10	Neutral
NC_030854.1	414000	415000	7	-0.811804	0.000218	7	Neutral
NC_030854.1	36802000	36803000	3	0.197741	0.00022	3	Neutral
NC_030854.1	32019000	32020000	4	0.0534429	0.000221	4	Neutral
NC_030854.1	29710000	29711000	2	1.49352	0.000223	2	Neutral
NC_030854.1	38846000	38847000	4	0.035788	0.000224	4	Neutral
NC_030854.1	2590000	2591000	4	0.220218	0.000224	4	Neutral
NC_030854.1	34302000	34303000	4	0.233549	0.000224	4	Neutral
NC_030854.1	39095000	39096000	2	1.47944	0.000224	2	Neutral
NC_030854.1	39008000	39009000	5	-0.198294	0.000225	5	Neutral
NC_030854.1	31115000	31116000	3	0.762806	0.000225	3	Neutral
NC_030854.1	37829000	37830000	9	-0.587355	0.000226	9	Neutral
NC_030854.1	5940000	5941000	3	0.955124	0.000226	3	Neutral
NC_030854.1	26294000	26295000	5	-0.408043	0.000231	5	Neutral
NC_030854.1	27287000	27288000	5	0.0919232	0.000231	5	Neutral
NC_030854.1	35214000	35215000	5	0.00527451	0.000232	5	Neutral
NC_030854.1	34036000	34037000	5	0.15219	0.000232	5	Neutral
NC_030854.1	1651000	1652000	4	0.397573	0.000232	4	Neutral
NC_030854.1	38908000	38909000	2	1.72386	0.000232	2	Balancing selection (D > 95th percentile)
NC_030854.1	24243000	24244000	4	0.0365931	0.000233	4	Neutral
NC_030854.1	3246000	3247000	5	-0.0165166	0.000235	5	Neutral
NC_030854.1	18823000	18824000	4	0.154669	0.000236	4	Neutral
NC_030854.1	28234000	28235000	7	-0.575858	0.000237	7	Neutral
NC_030854.1	37368000	37369000	2	1.69712	0.000238	2	Neutral
NC_030854.1	37754000	37755000	4	0.451583	0.000239	4	Neutral
NC_030854.1	1958000	1959000	4	0.510182	0.00024	4	Neutral
NC_030854.1	1583000	1584000	5	-0.249155	0.000241	5	Neutral
NC_030854.1	1281000	1282000	11	-1.23914	0.000244	12	Positive selection (D < 5th percentile)
NC_030854.1	23883000	23884000	9	-0.703618	0.000246	9	Neutral
NC_030854.1	36384000	36385000	3	0.575589	0.000247	3	Neutral
NC_030854.1	33584000	33585000	9	-0.917225	0.000248	9	Neutral
NC_030854.1	29705000	29706000	7	-0.64947	0.000249	7	Neutral
NC_030854.1	28691000	28692000	5	0.19471	0.000251	5	Neutral
NC_030854.1	361000	362000	5	-0.196216	0.000252	5	Neutral
NC_030854.1	9273000	9274000	4	0.644363	0.000255	4	Neutral
NC_030854.1	36961000	36962000	3	1.0109	0.000256	3	Neutral
NC_030854.1	39064000	39065000	10	-1.0394	0.000257	10	Neutral
NC_030854.1	26395000	26396000	5	0.0931341	0.000258	5	Neutral
NC_030854.1	38709000	38710000	5	0.38747	0.00026	5	Neutral
NC_030854.1	2270000	2271000	7	-0.48546	0.000261	7	Neutral
NC_030854.1	33651000	33652000	9	-0.81605	0.000263	9	Neutral
NC_030854.1	38988000	38989000	8	-0.837257	0.000266	8	Neutral
NC_030854.1	960000	961000	5	-0.155417	0.000268	5	Neutral
NC_030854.1	598000	599000	5	0.102187	0.000271	5	Neutral
NC_030854.1	36967000	36968000	3	1.08072	0.000274	3	Neutral
NC_030854.1	35857000	35858000	6	-0.055295	0.00028	6	Neutral
NC_030854.1	653000	654000	7	-0.374745	0.000281	7	Neutral
NC_030854.1	404000	405000	6	0.0812198	0.000283	6	Neutral
NC_030854.1	37954000	37955000	4	0.712524	0.000284	4	Neutral
NC_030854.1	1578000	1579000	4	0.881016	0.000284	4	Neutral
NC_030854.1	37913000	37914000	4	0.369456	0.000285	4	Neutral
NC_030854.1	36124000	36125000	7	-0.710023	0.000286	7	Neutral
NC_030854.1	27259000	27260000	6	-0.207815	0.000289	6	Neutral
NC_030854.1	38536000	38537000	4	-0.097327	0.000289	4	Neutral
NC_030854.1	38812000	38813000	11	-1.02552	0.00029	11	Neutral
NC_030854.1	716000	717000	5	-0.106423	0.000291	5	Neutral
NC_030854.1	32091000	32092000	5	0.090185	0.000291	5	Neutral
NC_030854.1	39146000	39147000	8	-0.611823	0.000292	8	Neutral
NC_030854.1	27240000	27241000	4	0.772946	0.000293	4	Neutral
NC_030854.1	22214000	22215000	8	-0.358349	0.000295	8	Neutral
NC_030854.1	403000	404000	5	0.134059	0.000295	5	Neutral
NC_030854.1	39087000	39088000	7	-0.441889	0.000296	7	Neutral
NC_030854.1	37099000	37100000	5	0.102019	0.000297	5	Neutral
NC_030854.1	33983000	33984000	7	-0.362417	0.000298	7	Neutral
NC_030854.1	39106000	39107000	2	2.62959	0.000298	2	Balancing selection (D > 95th percentile)
NC_030854.1	29881000	29882000	4	0.688326	0.000299	4	Neutral
NC_030854.1	25307000	25308000	6	-0.3128	0.000301	6	Neutral
NC_030854.1	931000	932000	4	0.518494	0.000302	4	Neutral
NC_030854.1	786000	787000	8	-0.718405	0.000304	8	Neutral
NC_030854.1	2301000	2302000	9	-0.53159	0.000304	9	Neutral
NC_030854.1	29712000	29713000	6	0.123764	0.000306	6	Neutral
NC_030854.1	3632000	3633000	5	0.336737	0.00031	5	Neutral
NC_030854.1	7973000	7974000	2	2.07536	0.00031	2	Balancing selection (D > 95th percentile)
NC_030854.1	924000	925000	7	-0.199865	0.000311	7	Neutral
NC_030854.1	746000	747000	4	1.07869	0.000312	4	Neutral
NC_030854.1	4638000	4639000	5	0.337033	0.000314	5	Neutral
NC_030854.1	37155000	37156000	8	-0.464245	0.000315	8	Neutral
NC_030854.1	3304000	3305000	4	0.402231	0.000316	4	Neutral
NC_030854.1	1754000	1755000	5	0.661163	0.000316	5	Neutral
NC_030854.1	35413000	35414000	3	1.24189	0.000317	3	Neutral
NC_030854.1	28537000	28538000	4	0.824946	0.000319	4	Neutral
NC_030854.1	4506000	4507000	12	-1.08697	0.000321	12	Neutral
NC_030854.1	19969000	19970000	7	-0.201643	0.000323	7	Neutral
NC_030854.1	135000	136000	4	0.682841	0.000324	4	Neutral
NC_030854.1	34602000	34603000	4	1.05645	0.000324	4	Neutral
NC_030854.1	36092000	36093000	2	2.61068	0.000327	2	Balancing selection (D > 95th percentile)
NC_030854.1	3691000	3692000	5	1.03189	0.000329	5	Neutral
NC_030854.1	38308000	38309000	2	2.5761	0.000329	2	Balancing selection (D > 95th percentile)
NC_030854.1	2465000	2466000	3	2.20902	0.00033	3	Balancing selection (D > 95th percentile)
NC_030854.1	29594000	29595000	4	1.45347	0.000333	4	Neutral
NC_030854.1	4324000	4325000	9	-0.753124	0.000335	9	Neutral
NC_030854.1	28858000	28859000	5	0.0494433	0.000339	5	Neutral
NC_030854.1	39059000	39060000	13	-1.03512	0.000341	13	Neutral
NC_030854.1	36813000	36814000	6	0.229116	0.000342	6	Neutral
NC_030854.1	28658000	28659000	4	1.03185	0.000342	4	Neutral
NC_030854.1	35636000	35637000	9	-0.456367	0.000343	9	Neutral
NC_030854.1	21066000	21067000	4	0.852241	0.000343	4	Neutral
NC_030854.1	1966000	1967000	8	-0.423386	0.000344	8	Neutral
NC_030854.1	27086000	27087000	8	-0.0144701	0.000345	8	Neutral
NC_030854.1	1280000	1281000	5	0.598077	0.000346	4	Neutral
NC_030854.1	35652000	35653000	5	0.949252	0.000346	5	Neutral
NC_030854.1	29544000	29545000	7	-0.000379	0.000348	7	Neutral
NC_030854.1	1366000	1367000	8	-0.319607	0.000349	8	Neutral
NC_030854.1	2661000	2662000	5	-0.242337	0.00035	5	Neutral
NC_030854.1	2983000	2984000	5	0.845058	0.00035	5	Neutral
NC_030854.1	35209000	35210000	6	0.310118	0.000355	6	Neutral
NC_030854.1	1065000	1066000	8	-0.328246	0.000357	8	Neutral
NC_030854.1	34611000	34612000	8	-0.262081	0.000361	8	Neutral
NC_030854.1	10796000	10797000	4	1.11707	0.000362	4	Neutral
NC_030854.1	37816000	37817000	10	-0.759413	0.000363	10	Neutral
NC_030854.1	4074000	4075000	8	-0.436253	0.000363	8	Neutral
NC_030854.1	36143000	36144000	2	2.62852	0.000365	2	Balancing selection (D > 95th percentile)
NC_030854.1	29236000	29237000	4	1.57709	0.000368	4	Neutral
NC_030854.1	36915000	36916000	10	-0.595991	0.00037	10	Neutral
NC_030854.1	28233000	28234000	7	0.108743	0.000376	7	Neutral
NC_030854.1	562000	563000	6	0.249182	0.000379	6	Neutral
NC_030854.1	1128000	1129000	10	-0.615158	0.00038	10	Neutral
NC_030854.1	38110000	38111000	6	0.351587	0.000381	6	Neutral
NC_030854.1	2288000	2289000	4	1.35126	0.000386	4	Neutral
NC_030854.1	26226000	26227000	2	2.46892	0.000387	2	Balancing selection (D > 95th percentile)
NC_030854.1	39066000	39067000	11	-0.442921	0.000388	11	Neutral
NC_030854.1	31344000	31345000	3	0.473663	0.000402	3	Neutral
NC_030854.1	2372000	2373000	5	0.868274	0.000402	5	Neutral
NC_030854.1	1556000	1557000	7	0.364406	0.000404	7	Neutral
NC_030854.1	25922000	25923000	7	0.197505	0.000405	7	Neutral
NC_030854.1	138000	139000	3	1.97363	0.000408	3	Balancing selection (D > 95th percentile)
NC_030854.1	4797000	4798000	7	0.102279	0.000409	7	Neutral
NC_030854.1	29966000	29967000	8	0.0990652	0.00041	8	Neutral
NC_030854.1	39002000	39003000	7	0.186483	0.00041	7	Neutral
NC_030854.1	405000	406000	10	-0.486508	0.000411	10	Neutral
NC_030854.1	3245000	3246000	8	-0.343157	0.000414	8	Neutral
NC_030854.1	39259000	39260000	5	0.771739	0.000415	5	Neutral
NC_030854.1	32035000	32036000	7	0.233116	0.00042	7	Neutral
NC_030854.1	36937000	36938000	9	-0.185836	0.000421	9	Neutral
NC_030854.1	30152000	30153000	4	1.37652	0.000425	4	Neutral
NC_030854.1	23364000	23365000	5	1.64226	0.000428	5	Neutral
NC_030854.1	1125000	1126000	10	-0.103044	0.000431	10	Neutral
NC_030854.1	30613000	30614000	6	0.546691	0.000433	6	Neutral
NC_030854.1	36901000	36902000	5	1.10788	0.000433	5	Neutral
NC_030854.1	13824000	13825000	8	0.133418	0.000434	8	Neutral
NC_030854.1	37879000	37880000	4	1.87043	0.000437	4	Balancing selection (D > 95th percentile)
NC_030854.1	33727000	33728000	6	1.18775	0.000438	6	Neutral
NC_030854.1	5595000	5596000	10	-0.110365	0.000448	10	Neutral
NC_030854.1	28857000	28858000	11	-0.243592	0.000449	11	Neutral
NC_030854.1	27085000	27086000	13	-0.362557	0.00045	13	Neutral
NC_030854.1	1440000	1441000	8	0.21003	0.00045	8	Neutral
NC_030854.1	2489000	2490000	7	0.421591	0.00045	7	Neutral
NC_030854.1	511000	512000	8	0.291415	0.000451	8	Neutral
NC_030854.1	30252000	30253000	7	0.128082	0.000452	7	Neutral
NC_030854.1	1781000	1782000	8	-0.43128	0.000453	8	Neutral
NC_030854.1	39065000	39066000	16	-0.91996	0.000454	16	Neutral
NC_030854.1	3578000	3579000	14	-1.04526	0.000455	14	Neutral
NC_030854.1	1707000	1708000	11	-0.491354	0.000456	11	Neutral
NC_030854.1	2026000	2027000	6	0.836698	0.000457	6	Neutral
NC_030854.1	38332000	38333000	11	-0.440667	0.000459	11	Neutral
NC_030854.1	38991000	38992000	2	1.74947	0.000468	2	Balancing selection (D > 95th percentile)
NC_030854.1	413000	414000	9	0.0167785	0.000476	9	Neutral
NC_030854.1	36383000	36384000	5	1.6453	0.000476	5	Neutral
NC_030854.1	30126000	30127000	7	0.662096	0.000479	7	Neutral
NC_030854.1	13837000	13838000	6	0.747773	0.000479	6	Neutral
NC_030854.1	2297000	2298000	17	-1.27088	0.000484	17	Positive selection (D < 5th percentile)
NC_030854.1	67000	68000	8	-0.131712	0.000484	8	Neutral
NC_030854.1	36934000	36935000	6	1.09158	0.000489	6	Neutral
NC_030854.1	35813000	35814000	19	-1.16958	0.000494	19	Positive selection (D < 5th percentile)
NC_030854.1	36935000	36936000	9	0.510022	0.000499	9	Neutral
NC_030854.1	33106000	33107000	9	0.412629	0.000506	9	Neutral
NC_030854.1	2881000	2882000	7	0.48789	0.000506	7	Neutral
NC_030854.1	33421000	33422000	5	1.78897	0.000506	5	Balancing selection (D > 95th percentile)
NC_030854.1	34747000	34748000	14	-0.560191	0.000513	13	Neutral
NC_030854.1	21968000	21969000	6	0.557346	0.000514	6	Neutral
NC_030854.1	28748000	28749000	6	-0.311656	0.000517	6	Neutral
NC_030854.1	34213000	34214000	8	0.702273	0.000518	8	Neutral
NC_030854.1	32020000	32021000	12	-0.344157	0.000525	12	Neutral
NC_030854.1	39111000	39112000	8	0.784083	0.000529	8	Neutral
NC_030854.1	28591000	28592000	9	0.291106	0.000533	9	Neutral
NC_030854.1	1555000	1556000	8	0.853399	0.000533	8	Neutral
NC_030854.1	35743000	35744000	11	-0.249085	0.000534	11	Neutral
NC_030854.1	39060000	39061000	14	-0.587576	0.000546	14	Neutral
NC_030854.1	28258000	28259000	6	1.42409	0.000546	6	Neutral
NC_030854.1	32391000	32392000	6	1.72893	0.000547	6	Balancing selection (D > 95th percentile)
NC_030854.1	2303000	2304000	15	-0.721139	0.000548	15	Neutral
NC_030854.1	2295000	2296000	10	-0.0310081	0.000556	10	Neutral
NC_030854.1	35814000	35815000	17	-1.0899	0.000557	17	Neutral
NC_030854.1	39058000	39059000	16	-0.725473	0.000557	16	Neutral
NC_030854.1	4048000	4049000	10	0.394273	0.000557	10	Neutral
NC_030854.1	36992000	36993000	13	-0.2445	0.000558	13	Neutral
NC_030854.1	37194000	37195000	12	-0.281565	0.000561	12	Neutral
NC_030854.1	36369000	36370000	8	0.0805667	0.000578	8	Neutral
NC_030854.1	1276000	1277000	13	0.347828	0.000584	13	Neutral
NC_030854.1	244000	245000	6	1.68376	0.000591	6	Neutral
NC_030854.1	1915000	1916000	9	0.358651	0.000594	9	Neutral
NC_030854.1	2464000	2465000	6	1.11477	0.000595	6	Neutral
NC_030854.1	34748000	34749000	9	0.213141	0.000601	10	Neutral
NC_030854.1	30270000	30271000	13	-0.31263	0.000605	13	Neutral
NC_030854.1	1077000	1078000	5	0.879154	0.000609	5	Neutral
NC_030854.1	1585000	1586000	11	-0.11181	0.000614	11	Neutral
NC_030854.1	36912000	36913000	11	0.261064	0.000616	11	Neutral
NC_030854.1	1310000	1311000	6	1.33186	0.000622	6	Neutral
NC_030854.1	38992000	38993000	21	-1.08854	0.000629	21	Neutral
NC_030854.1	6111000	6112000	11	0.409087	0.000629	11	Neutral
NC_030854.1	34303000	34304000	10	0.859718	0.000641	10	Neutral
NC_030854.1	38174000	38175000	13	0.196603	0.000648	13	Neutral
NC_030854.1	33397000	33398000	14	-0.480404	0.000649	14	Neutral
NC_030854.1	2184000	2185000	13	-0.166319	0.000658	13	Neutral
NC_030854.1	10316000	10317000	8	0.951056	0.000658	8	Neutral
NC_030854.1	27268000	27269000	11	0.640141	0.000661	11	Neutral
NC_030854.1	28746000	28747000	14	-0.0292226	0.000665	14	Neutral
NC_030854.1	2432000	2433000	10	0.405326	0.000687	10	Neutral
NC_030854.1	39260000	39261000	11	0.08865	0.000691	11	Neutral
NC_030854.1	8050000	8051000	9	0.50476	0.000696	9	Neutral
NC_030854.1	38859000	38860000	15	0.09524	0.000701	15	Neutral
NC_030854.1	8533000	8534000	7	1.44754	0.000702	7	Neutral
NC_030854.1	37851000	37852000	11	0.41472	0.000714	11	Neutral
NC_030854.1	4140000	4141000	9	0.705715	0.000719	9	Neutral
NC_030854.1	35598000	35599000	12	-0.0928086	0.000721	12	Neutral
NC_030854.1	10315000	10316000	6	1.82358	0.000725	6	Balancing selection (D > 95th percentile)
NC_030854.1	39145000	39146000	18	-0.362361	0.000726	18	Neutral
NC_030854.1	33420000	33421000	8	1.64185	0.000727	8	Neutral
NC_030854.1	31112000	31113000	21	-0.719724	0.000732	21	Neutral
NC_030854.1	1237000	1238000	22	-0.7768	0.000742	22	Neutral
NC_030854.1	28232000	28233000	13	0.276563	0.000746	13	Neutral
NC_030854.1	33984000	33985000	14	0.106723	0.000757	14	Neutral
NC_030854.1	953000	954000	12	0.467473	0.000775	12	Neutral
NC_030854.1	28235000	28236000	12	0.621892	0.000787	12	Neutral
NC_030854.1	22266000	22267000	13	-0.593906	0.00079	13	Neutral
NC_030854.1	6110000	6111000	24	-0.840363	0.000809	24	Neutral
NC_030854.1	1576000	1577000	13	0.747111	0.000828	13	Neutral
NC_030854.1	28592000	28593000	12	0.789656	0.000831	12	Neutral
NC_030854.1	31986000	31987000	16	0.139951	0.000842	16	Neutral
NC_030854.1	461000	462000	16	-0.212555	0.000852	16	Neutral
NC_030854.1	2028000	2029000	20	-0.401844	0.000859	20	Neutral
NC_030854.1	3576000	3577000	24	2.08352	0.000867	24	Balancing selection (D > 95th percentile)
NC_030854.1	2309000	2310000	17	0.103583	0.000868	17	Neutral
NC_030854.1	32117000	32118000	12	1.03989	0.000885	12	Neutral
NC_030854.1	36936000	36937000	16	0.0591961	0.000903	16	Neutral
NC_030854.1	35599000	35600000	12	0.876378	0.000956	12	Neutral
NC_030854.1	2310000	2311000	9	2.13874	0.000999	9	Balancing selection (D > 95th percentile)
NC_030854.1	2311000	2312000	13	1.27517	0.00102297	13	Neutral
NC_030854.1	4049000	4050000	14	1.0264	0.00102822	14	Neutral
NC_030854.1	1623000	1624000	11	0.952858	0.00104037	11	Neutral
NC_030854.1	37100000	37101000	25	-0.596596	0.00104766	25	Neutral
NC_030854.1	27479000	27480000	17	0.667941	0.00104912	17	Neutral
NC_030854.1	36914000	36915000	21	-0.330867	0.00105086	21	Neutral
NC_030854.1	2296000	2297000	15	0.888908	0.00112837	15	Neutral
NC_030854.1	2027000	2028000	12	1.79975	0.00114087	12	Balancing selection (D > 95th percentile)
NC_030854.1	27480000	27481000	17	1.1064	0.00119506	17	Neutral
NC_030854.1	36913000	36914000	25	-0.261761	0.00120446	25	Neutral
NC_030854.1	33156000	33157000	12	2.0773	0.00121394	12	Balancing selection (D > 95th percentile)
NC_030854.1	13823000	13824000	18	1.15463	0.00129293	18	Neutral
NC_030854.1	36785000	36786000	11	1.93464	0.00132211	11	Balancing selection (D > 95th percentile)
NC_030854.1	2287000	2288000	16	1.49475	0.00132673	16	Neutral
NC_030854.1	31993000	31994000	21	0.936043	0.00133482	21	Neutral
NC_030854.1	1584000	1585000	14	0.418121	0.00135936	14	Neutral
NC_030854.1	22265000	22266000	24	0.31714	0.00142017	24	Neutral
NC_030854.1	38298000	38299000	7	1.9705	0.00146441	7	Balancing selection (D > 95th percentile)
NC_030854.1	2300000	2301000	32	-0.123562	0.00146763	32	Neutral
NC_030854.1	33585000	33586000	28	-0.129064	0.00149686	28	Neutral
NC_030854.1	2304000	2305000	27	0.119939	0.0015319	27	Neutral
NC_030854.1	3577000	3578000	31	0.157807	0.00166503	31	Neutral
NC_030854.1	28747000	28748000	20	0.815012	0.00167956	20	Neutral
NC_030854.1	1577000	1578000	21	1.1483	0.00170887	21	Neutral
NC_030854.1	1273000	1274000	26	1.40322	0.0017937	26	Neutral
NC_030854.1	33985000	33986000	25	0.636156	0.00179856	25	Neutral
NC_030854.1	29609000	29610000	16	3.64242	0.00221541	16	Balancing selection (D > 95th percentile)
NC_030854.1	523000	524000	24	1.82854	0.00224417	24	Balancing selection (D > 95th percentile)
NC_030854.1	959000	960000	26	1.4462	0.00225627	26	Neutral
NC_030854.1	35742000	35743000	42	0.220254	0.00240424	42	Neutral
NC_030854.1	29608000	29609000	37	2.423	0.00388393	37	Balancing selection (D > 95th percentile)
NC_030855.1	13577000	13578000	1	-0.879577	4.13e-06	1	Neutral
NC_030855.1	1537000	1538000	1	-0.885726	4.37e-06	1	Neutral
NC_030855.1	3591000	3592000	1	-0.885726	4.37e-06	1	Neutral
NC_030855.1	11683000	11684000	1	-0.891244	4.61e-06	1	Neutral
NC_030855.1	13063000	13064000	2	-1.19396	8.58e-06	2	Positive selection (D < 5th percentile)
NC_030855.1	13087000	13088000	1	-0.780079	8.65e-06	1	Neutral
NC_030855.1	1461000	1462000	1	-0.787429	8.98e-06	1	Neutral
NC_030855.1	1316000	1317000	2	-1.2073	9.46e-06	2	Positive selection (D < 5th percentile)
NC_030855.1	1935000	1936000	1	-0.800706	9.62e-06	1	Neutral
NC_030855.1	12849000	12850000	1	-0.800706	9.62e-06	1	Neutral
NC_030855.1	16857000	16858000	2	-1.11965	1.27e-05	2	Neutral
NC_030855.1	1556000	1557000	1	-0.676408	1.29e-05	1	Neutral
NC_030855.1	17870000	17871000	2	-1.13707	1.38e-05	2	Neutral
NC_030855.1	5172000	5173000	3	-1.41602	1.4e-05	3	Positive selection (D < 5th percentile)
NC_030855.1	1565000	1566000	2	-1.06139	1.78e-05	2	Neutral
NC_030855.1	10328000	10329000	2	-0.989066	2.15e-05	2	Neutral
NC_030855.1	209000	210000	1	-0.492341	2.18e-05	1	Neutral
NC_030855.1	17644000	17645000	4	-1.51972	2.23e-05	4	Positive selection (D < 5th percentile)
NC_030855.1	3690000	3691000	1	-0.407365	2.64e-05	1	Neutral
NC_030855.1	9825000	9826000	1	-0.229726	2.66e-05	1	Neutral
NC_030855.1	2278000	2279000	1	-0.425868	2.74e-05	1	Neutral
NC_030855.1	2876000	2877000	1	-0.459585	2.93e-05	1	Neutral
NC_030855.1	18185000	18186000	1	-0.315916	3.06e-05	1	Neutral
NC_030855.1	472000	473000	1	-0.326673	3.11e-05	1	Neutral
NC_030855.1	1622000	1623000	2	-0.786169	3.46e-05	2	Neutral
NC_030855.1	350000	351000	1	-0.238298	3.53e-05	1	Neutral
NC_030855.1	3749000	3750000	1	0.0449404	3.77e-05	1	Neutral
NC_030855.1	17251000	17252000	1	-0.151639	3.93e-05	1	Neutral
NC_030855.1	5847000	5848000	3	-1.20827	4.11e-05	3	Positive selection (D < 5th percentile)
NC_030855.1	17815000	17816000	2	-0.532365	4.72e-05	2	Neutral
NC_030855.1	1318000	1319000	1	-0.0132876	4.89e-05	1	Neutral
NC_030855.1	659000	660000	5	-1.2239	5.23e-05	5	Positive selection (D < 5th percentile)
NC_030855.1	4407000	4408000	4	-1.20328	5.24e-05	4	Positive selection (D < 5th percentile)
NC_030855.1	13057000	13058000	2	-0.627071	5.49e-05	2	Neutral
NC_030855.1	13576000	13577000	1	0.293642	5.61e-05	1	Neutral
NC_030855.1	3780000	3781000	2	-0.489724	5.7e-05	2	Neutral
NC_030855.1	6872000	6873000	1	0.255916	5.83e-05	1	Neutral
NC_030855.1	3754000	3755000	3	-0.832342	6.42e-05	3	Neutral
NC_030855.1	3558000	3559000	2	-0.442532	6.42e-05	2	Neutral
NC_030855.1	13856000	13857000	2	-0.629878	6.51e-05	2	Neutral
NC_030855.1	12281000	12282000	4	-0.977715	7.93e-05	4	Neutral
NC_030855.1	1536000	1537000	2	-0.510618	8.1e-05	2	Neutral
NC_030855.1	2221000	2222000	2	-0.371976	8.33e-05	2	Neutral
NC_030855.1	17028000	17029000	1	0.953126	9.72e-05	1	Neutral
NC_030855.1	1917000	1918000	4	-0.88186	0.000101	4	Neutral
NC_030855.1	2633000	2634000	5	-1.07444	0.000103	5	Neutral
NC_030855.1	10225000	10226000	5	-1.06555	0.000104	5	Neutral
NC_030855.1	16097000	16098000	3	-0.669659	0.000107	3	Neutral
NC_030855.1	669000	670000	2	-0.0376182	0.000107	2	Neutral
NC_030855.1	3724000	3725000	4	-0.651176	0.00011	4	Neutral
NC_030855.1	13771000	13772000	1	1.61243	0.00011	1	Neutral
NC_030855.1	15570000	15571000	2	-0.0937727	0.000112	2	Neutral
NC_030855.1	5541000	5542000	2	0.471711	0.000112	2	Neutral
NC_030855.1	18010000	18011000	2	0.313332	0.00012	2	Neutral
NC_030855.1	3157000	3158000	2	0.338798	0.000123	2	Neutral
NC_030855.1	2877000	2878000	4	-0.626216	0.000127	4	Neutral
NC_030855.1	17250000	17251000	2	0.426812	0.000127	2	Neutral
NC_030855.1	5003000	5004000	5	-0.800367	0.000128	5	Neutral
NC_030855.1	14391000	14392000	4	-0.65916	0.000133	4	Neutral
NC_030855.1	3362000	3363000	1	1.83606	0.000141	1	Balancing selection (D > 95th percentile)
NC_030855.1	3725000	3726000	1	1.8778	0.000143	1	Balancing selection (D > 95th percentile)
NC_030855.1	2237000	2238000	1	1.98011	0.000144	1	Balancing selection (D > 95th percentile)
NC_030855.1	4280000	4281000	1	1.98054	0.000148	1	Balancing selection (D > 95th percentile)
NC_030855.1	3145000	3146000	4	-0.422965	0.000149	4	Neutral
NC_030855.1	452000	453000	6	-0.855942	0.000151	6	Neutral
NC_030855.1	7259000	7260000	4	-0.50967	0.000151	4	Neutral
NC_030855.1	18011000	18012000	4	-0.418186	0.000156	4	Neutral
NC_030855.1	6133000	6134000	1	1.9663	0.000158	1	Balancing selection (D > 95th percentile)
NC_030855.1	2179000	2180000	5	-0.676558	0.000161	5	Neutral
NC_030855.1	4318000	4319000	3	0.23411	0.000161	3	Neutral
NC_030855.1	17949000	17950000	3	0.0958435	0.00017	3	Neutral
NC_030855.1	4207000	4208000	10	0.997404	0.00017	10	Neutral
NC_030855.1	13802000	13803000	1	1.61243	0.000171	1	Neutral
NC_030855.1	14555000	14556000	8	-1.03322	0.000172	8	Neutral
NC_030855.1	6292000	6293000	1	1.80672	0.000174	1	Balancing selection (D > 95th percentile)
NC_030855.1	7674000	7675000	4	-0.296873	0.000175	4	Neutral
NC_030855.1	18137000	18138000	3	0.253176	0.000175	3	Neutral
NC_030855.1	3741000	3742000	4	-0.0835006	0.000184	4	Neutral
NC_030855.1	17791000	17792000	1	1.91963	0.000191	1	Balancing selection (D > 95th percentile)
NC_030855.1	2220000	2221000	4	-0.138873	0.000193	4	Neutral
NC_030855.1	3797000	3798000	2	0.885446	0.000193	2	Neutral
NC_030855.1	12280000	12281000	3	0.499365	0.000198	3	Neutral
NC_030855.1	388000	389000	5	-0.0079745	0.000204	5	Neutral
NC_030855.1	1327000	1328000	5	-0.12549	0.000205	5	Neutral
NC_030855.1	4261000	4262000	5	-0.190209	0.000206	5	Neutral
NC_030855.1	16668000	16669000	7	-0.756555	0.00021	7	Neutral
NC_030855.1	453000	454000	1	1.97937	0.000212	1	Balancing selection (D > 95th percentile)
NC_030855.1	10226000	10227000	3	0.441337	0.000215	3	Neutral
[truncated: 1,276 more rows]

## Sheet: Table S12
	Table S12 Chromosome-wise distribution and enrichment analysis of atypical coding-region windows identified by Tajima’s D in T. cacao
Chromosome	Atypical windows (Tajima’s D outliers)	Total windows analyzed	Non-atypical windows	Fisher’s exact test P-value	Odds ratio (OR)	Permutation test P-value	Significant (Fisher’s test)	Significant (permutation test)	Enrichment status
Chr1	5	23	18	0.0729562	2.51619	0.0704	FALSE	FALSE	Not significant
Chr2	61	613	552	1	0.990428	0.545	FALSE	FALSE	Not significant
Chr3	47	551	504	0.213839	0.810134	0.9078	FALSE	FALSE	Not significant
Chr4	16	162	146	1	0.983145	0.568	FALSE	FALSE	Not significant
Chr5	58	561	503	0.757919	1.04289	0.4156	FALSE	FALSE	Not significant
Chr6	23	153	130	0.0388571	1.63262	0.0317	TRUE	TRUE	Enriched
Chr7	27	183	156	0.0413246	1.60341	0.0252	TRUE	TRUE	Enriched
Chr8	8	122	114	0.220996	0.62091	0.9378	FALSE	FALSE	Not significant
Chr9	56	639	583	0.270514	0.834172	0.8982	FALSE	FALSE	Not significant
Chr10	27	266	239	0.915268	1.01561	0.5035	FALSE	FALSE	Not significant

## Sheet: Table S13
	Table S13 Atypical Tajima’s D windows in coding regions of chromosomes 6 and 7 of T. cacao, corresponding to statistically significant hotspots with intermediate allele frequencies
Chromosome	Gene start position (bp)	Gene end position (bp)	SNP position (bp)	Variant consequence	Predicted impact	Gene ID	Protein accession	Locus ID	Number of alleles	Reference allele frequency	Alternate allele	Alternate allele frequency	Window start (bp)	Window end (bp)	SNPs per window in (π)	Nucleotide diversity (π)	SNPs per window in Tajima’s D	Tajima’s D	Selection category
NC_030855.1	3362622	3362822	3362730	missense variant	MODERATE	Tc06v2_g002950	XP_017979048.1	LOC18595384	2	G:0.614754	A	0.385246	3362000	3363000	1	0.000141	1	1.83606	Balancing selection (D > 95th percentile)
NC_030855.1	3724818	3725045	3725029	missense variant	MODERATE	Tc06v2_g003200	XP_007023401.2	LOC18595413	2	A:0.598361	G	0.401639	3725000	3726000	1	0.000143	1	1.8778	Balancing selection (D > 95th percentile)
NC_030855.1	13856865	13859486	13859479	missense variant	MODERATE	Tc06v2_g006270	XP_017979491.1	LOC18595805	2	A:0.574627	C	0.425373	13859000	13860000	12	0.0011435	12	1.90832	Balancing selection (D > 95th percentile)
NC_030855.1	452632	453022	453016	missense variant	MODERATE	Tc06v2_g000370	XP_007022927.2	LOC18595074	2	C:0.534247	G	0.465753	453000	454000	1	0.000212	1	1.97937	Balancing selection (D > 95th percentile)
NC_030855.1	2237295	2237374	2237301	missense variant	MODERATE	Tc06v2_g002090	XP_017979145.1	LOC18595277	2	G:0.466667	A	0.533333	2237000	2238000	1	0.000144	1	1.98011	Balancing selection (D > 95th percentile)
NC_030855.1	6133149	6133358	6133183	missense variant	MODERATE	Tc06v2_g004180	XP_007023625.2	LOC18595555	2	T:0.452381	C	0.547619	6133000	6134000	1	0.000158	1	1.9663	Balancing selection (D > 95th percentile)
NC_030855.1	5905845	5906203	5906043	missense variant	MODERATE	Tc06v2_g004120	XP_017979368.1	LOC18595543	2	A:0.442029	T	0.557971	5906000	5907000	2	0.00027	2	1.96536	Balancing selection (D > 95th percentile)
NC_030855.1	13819316	13820041	13819706	missense variant	MODERATE	Tc06v2_g006240	XP_007023976.2	LOC18595804	2	G:0.382353	T	0.617647	13819000	13820000	9	0.00100213	9	1.87856	Balancing selection (D > 95th percentile)
NC_030856.1	1401594	1401836	1401827	missense variant	MODERATE	Tc07v2_g002310	XP_017980594.1	LOC18593404	2	C:0.678571	G	0.321429	1401000	1402000	12	0.00120119	12	2.65398	Balancing selection (D > 95th percentile)
NC_030856.1	2478314	2478574	2478418	missense variant	MODERATE	Tc07v2_g003890	XP_017980596.1	LOC18593582	2	C:0.663793	G	0.336207	2478000	2479000	4	0.000408	4	1.96888	Balancing selection (D > 95th percentile)
NC_030856.1	2520763	2521095	2520769	missense variant	MODERATE	Tc07v2_g003960	XP_007020962.2	LOC18593590	2	G:0.604839	T	0.395161	2520000	2521000	15	0.00196059	15	3.18935	Balancing selection (D > 95th percentile)
NC_030856.1	1025864	1028239	1026008	missense variant	MODERATE	Tc07v2_g001630	XP_017980613.1	LOC18593332	2	G:0.6	A	0.4	1026000	1027000	4	0.000183	4	3.3571	Balancing selection (D > 95th percentile)
NC_030856.1	1501282	1501377	1501285	missense variant	MODERATE	Tc07v2_g002360	XP_017980739.1	LOC18593416	2	G:0.537313	T	0.462687	1501000	1502000	1	0.000179	1	1.97675	Balancing selection (D > 95th percentile)
NC_030856.1	6602854	6603180	6602935	missense variant	MODERATE	Tc07v2_g008920	XP_017980720.1	LOC18594181	2	C:0.507937	A	0.492063	6602000	6603000	1	0.000159	1	1.99263	Balancing selection (D > 95th percentile)
NC_030856.1	4383224	4384006	4383473	missense variant	MODERATE	Tc07v2_g006340	XP_007021322.2	LOC18593861	2	T:0.492647	A	0.507353	4383000	4384000	6	0.000763	6	1.73616	Balancing selection (D > 95th percentile)
NC_030856.1	5609231	5609497	5609412	missense variant	MODERATE	Tc07v2_g007680	XP_017980706.1	LOC18594034	2	A:0.492308	G	0.507692	5609000	5610000	5	0.000599	5	2.17829	Balancing selection (D > 95th percentile)
NC_030856.1	4100715	4100967	4100868	missense variant	MODERATE	Tc07v2_g005890	XP_007021247.2	LOC18593809	2	A:0.476562	G	0.523438	4100000	4101000	1	0.000164	1	1.98682	Balancing selection (D > 95th percentile)
NC_030856.1	5556776	5557048	5556936	missense variant	MODERATE	Tc07v2_g007600	XP_017979588.1	LOC18594025	2	T:0.335938	C	0.664062	5556000	5557000	9	0.000209	9	-1.25773	Positive selection (D < 5th percentile)
NC_030856.1	5338877	5339368	5339299	missense variant	MODERATE	Tc07v2_g007420	XP_007021504.2	LOC18594002	2	G:0.212121	T	0.787879	5339000	5340000	21	0.000409	21	-1.6777	Positive selection (D < 5th percentile)

## Sheet: Table S14
	Table S14 Enriched Gene Ontology (GO) biological process terms for candidate resistance genes harboring SNPs in coding regions of T. cacao
False discovery rate (FDR)	Number of genes in query	Number of genes in GO term	Fold Enrichment	GO term (Biological Process)	Associated genes
1.14198e-42	434	1933	1.92997	GO:0050896 Response to stimulus	TC01V2_G000540 TC01V2_G000700 TC02V2_G003850 TC02V2_G004790 TC02V2_G007010 TC02V2_G009220 TC02V2_G009440 TC02V2_G011150 TC02V2_G012260 TC02V2_G017710 TC02V2_G023720 TC03V2_G001110 TC03V2_G005950 TC03V2_G008260 TC03V2_G012170 TC03V2_G018980 TC03V2_G023470 TC03V2_G023820 TC04V2_G001130 TC04V2_G004340 TC05V2_G000660 TC05V2_G001500 TC05V2_G001730 TC05V2_G004370 TC05V2_G004580 TC05V2_G004670 TC05V2_G0…
1.18319e-36	214	730	2.5199	GO:0042221 Response to chemical	TC01V2_G000540 TC02V2_G004790 TC03V2_G001110 TC03V2_G012170 TC03V2_G018980 TC03V2_G023470 TC04V2_G001130 TC05V2_G000660 TC05V2_G001730 TC05V2_G004370 TC05V2_G004670 TC05V2_G006930 TC05V2_G012050 TC05V2_G018130 TC08V2_G004850 TC09V2_G002940 TC09V2_G025970 TC09V2_G025980 TC09V2_G029190 TC10V2_G000030 TC10V2_G001240 TC10V2_G010520 TC03V2_G006670 TC03V2_G016600 TC09V2_G020080 TC02V2_G003750 TC02V2_G0…
4.83334e-34	344	1517	1.94924	GO:0051179 Localization	TC02V2_G002920 TC02V2_G009470 TC02V2_G012930 TC02V2_G016860 TC02V2_G017430 TC02V2_G021990 TC03V2_G000990 TC03V2_G005540 TC03V2_G006410 TC03V2_G008590 TC03V2_G010680 TC03V2_G012860 TC03V2_G015530 TC03V2_G017970 TC03V2_G018020 TC03V2_G019750 TC03V2_G021840 TC03V2_G025730 TC04V2_G000980 TC04V2_G003190 TC04V2_G007400 TC05V2_G000820 TC05V2_G000890 TC05V2_G003410 TC05V2_G006060 TC05V2_G009380 TC05V2_G0…
2.49752e-32	331	1466	1.94083	GO:0051234 Establishment of localization	TC02V2_G002920 TC02V2_G009470 TC02V2_G012930 TC02V2_G016860 TC02V2_G017430 TC02V2_G021990 TC03V2_G000990 TC03V2_G005540 TC03V2_G006410 TC03V2_G008590 TC03V2_G010680 TC03V2_G012860 TC03V2_G015530 TC03V2_G017970 TC03V2_G018020 TC03V2_G019750 TC03V2_G021840 TC03V2_G025730 TC04V2_G000980 TC04V2_G003190 TC04V2_G007400 TC05V2_G000820 TC05V2_G000890 TC05V2_G003410 TC05V2_G006060 TC05V2_G009380 TC05V2_G0…
3.31236e-32	211	765	2.3709	GO:0044281 Small molecule metabolic process	TC01V2_G000620 TC02V2_G005950 TC02V2_G008650 TC02V2_G008660 TC02V2_G009260 TC02V2_G017100 TC02V2_G018410 TC02V2_G027440 TC03V2_G000670 TC03V2_G005020 TC03V2_G009260 TC03V2_G018370 TC03V2_G019250 TC03V2_G019320 TC03V2_G025400 TC04V2_G001140 TC04V2_G002430 TC04V2_G004480 TC04V2_G008660 TC05V2_G001360 TC05V2_G002170 TC05V2_G004160 TC05V2_G005370 TC05V2_G011950 TC05V2_G020100 TC06V2_G002870 TC06V2_G0…
3.91191e-32	326	1441	1.94467	GO:0006810 Transport	TC02V2_G002920 TC02V2_G009470 TC02V2_G012930 TC02V2_G016860 TC02V2_G017430 TC02V2_G021990 TC03V2_G000990 TC03V2_G005540 TC03V2_G006410 TC03V2_G008590 TC03V2_G010680 TC03V2_G012860 TC03V2_G015530 TC03V2_G017970 TC03V2_G018020 TC03V2_G019750 TC03V2_G021840 TC03V2_G025730 TC04V2_G000980 TC04V2_G003190 TC04V2_G007400 TC05V2_G000820 TC05V2_G000890 TC05V2_G003410 TC05V2_G006060 TC05V2_G009380 TC05V2_G0…
3.55008e-28	75	152	4.24142	GO:0006979 Response to oxidative stress	TC01V2_G000540 TC02V2_G004790 TC03V2_G001110 TC03V2_G012170 TC04V2_G001130 TC05V2_G004670 TC05V2_G006930 TC09V2_G002940 TC09V2_G025970 TC09V2_G025980 TC09V2_G028630 TC02V2_G002790 TC02V2_G003150 TC02V2_G007710 TC02V2_G011740 TC02V2_G011750 TC02V2_G011760 TC02V2_G011770 TC02V2_G011780 TC02V2_G011800 TC02V2_G011810 TC02V2_G025710 TC02V2_G025720 TC02V2_G025730 TC02V2_G025740 TC02V2_G026910 TC02V2_G0…
5.70129e-26	138	446	2.65973	GO:0019752 Carboxylic acid metabolic process	TC01V2_G000620 TC02V2_G005950 TC02V2_G008650 TC02V2_G008660 TC02V2_G009260 TC02V2_G018410 TC02V2_G027440 TC03V2_G009260 TC03V2_G018370 TC03V2_G019250 TC03V2_G019320 TC04V2_G001140 TC05V2_G005370 TC05V2_G011950 TC05V2_G020100 TC06V2_G002870 TC06V2_G006570 TC08V2_G004280 TC09V2_G003770 TC09V2_G024320 TC09V2_G025450 TC10V2_G000510 TC10V2_G003520 TC02V2_G029070 TC03V2_G006780 TC05V2_G000840 TC08V2_G0…
7.56073e-26	139	453	2.6376	GO:0043436 Oxoacid metabolic process	TC01V2_G000620 TC02V2_G005950 TC02V2_G008650 TC02V2_G008660 TC02V2_G009260 TC02V2_G018410 TC02V2_G027440 TC03V2_G009260 TC03V2_G018370 TC03V2_G019250 TC03V2_G019320 TC04V2_G001140 TC05V2_G005370 TC05V2_G011950 TC05V2_G020100 TC06V2_G002870 TC06V2_G006570 TC08V2_G004280 TC09V2_G003770 TC09V2_G024320 TC09V2_G025450 TC10V2_G000510 TC10V2_G003520 TC02V2_G029070 TC03V2_G006780 TC05V2_G000840 TC08V2_G0…
7.56073e-26	176	649	2.3311	GO:0009056 Catabolic process	TC01V2_G000540 TC02V2_G004620 TC02V2_G004720 TC02V2_G004790 TC02V2_G004810 TC02V2_G005360 TC02V2_G008650 TC02V2_G008660 TC02V2_G009470 TC02V2_G015700 TC02V2_G018410 TC02V2_G022140 TC02V2_G027440 TC02V2_G029530 TC03V2_G000780 TC03V2_G005020 TC03V2_G009260 TC03V2_G010070 TC03V2_G017080 TC03V2_G019250 TC03V2_G019320 TC03V2_G020050 TC03V2_G022360 TC03V2_G026090 TC04V2_G003810 TC04V2_G007360 TC05V2_G0…
8.62996e-26	139	454	2.6318	GO:0006082 Organic acid metabolic process	TC01V2_G000620 TC02V2_G005950 TC02V2_G008650 TC02V2_G008660 TC02V2_G009260 TC02V2_G018410 TC02V2_G027440 TC03V2_G009260 TC03V2_G018370 TC03V2_G019250 TC03V2_G019320 TC04V2_G001140 TC05V2_G005370 TC05V2_G011950 TC05V2_G020100 TC06V2_G002870 TC06V2_G006570 TC08V2_G004280 TC09V2_G003770 TC09V2_G024320 TC09V2_G025450 TC10V2_G000510 TC10V2_G003520 TC02V2_G029070 TC03V2_G006780 TC05V2_G000840 TC08V2_G0…
2.93101e-25	201	798	2.16514	GO:0055085 Transmembrane transport	TC02V2_G012930 TC03V2_G000990 TC03V2_G008590 TC03V2_G010680 TC03V2_G018020 TC04V2_G003190 TC05V2_G000890 TC05V2_G024930 TC06V2_G002420 TC06V2_G006110 TC07V2_G008420 TC09V2_G004540 TC09V2_G029190 TC09V2_G029630 TC02V2_G011030 TC02V2_G014400 TC05V2_G002020 TC09V2_G024360 TC09V2_G025780 TC10V2_G007090 TC01V2_G000210 TC02V2_G000260 TC02V2_G000950 TC02V2_G000960 TC02V2_G001000 TC02V2_G001010 TC02V2_G0…
1.02515e-22	54	100	4.6418	GO:0072593 Reactive oxygen species metabolic process	TC01V2_G000540 TC02V2_G004790 TC05V2_G004670 TC05V2_G006930 TC02V2_G003150 TC02V2_G007010 TC02V2_G007710 TC02V2_G011740 TC02V2_G011750 TC02V2_G011760 TC02V2_G011770 TC02V2_G011780 TC02V2_G011800 TC02V2_G011810 TC02V2_G025710 TC02V2_G025720 TC02V2_G025730 TC02V2_G025740 TC02V2_G026910 TC02V2_G026920 TC02V2_G027400 TC03V2_G000310 TC03V2_G011920 TC03V2_G013850 TC03V2_G019390 TC04V2_G000210 TC04V2_G0…
5.64663e-21	236	1075	1.88711	GO:0006950 Response to stress	TC01V2_G000540 TC01V2_G000700 TC02V2_G003850 TC02V2_G004790 TC02V2_G009220 TC03V2_G001110 TC03V2_G008260 TC03V2_G012170 TC03V2_G023470 TC03V2_G023820 TC04V2_G001130 TC04V2_G004340 TC05V2_G001730 TC05V2_G004580 TC05V2_G004670 TC05V2_G006930 TC05V2_G012050 TC05V2_G020300 TC08V2_G001700 TC09V2_G002940 TC09V2_G025970 TC09V2_G025980 TC09V2_G027270 TC09V2_G028630 TC10V2_G010520 TC02V2_G011910 TC03V2_G0…
2.02247e-20	122	420	2.49691	GO:0009628 Response to abiotic stimulus	TC02V2_G017710 TC03V2_G008260 TC03V2_G023470 TC03V2_G023820 TC05V2_G001500 TC05V2_G001730 TC06V2_G006570 TC09V2_G014980 TC09V2_G025970 TC09V2_G025980 TC10V2_G005860 TC10V2_G010520 TC03V2_G006670 TC03V2_G021850 TC07V2_G004880 TC10V2_G005610 TC02V2_G004110 TC02V2_G009410 TC02V2_G012230 TC02V2_G012380 TC02V2_G012560 TC02V2_G016860 TC02V2_G025310 TC03V2_G000670 TC03V2_G005950 TC03V2_G007020 TC03V2_G0…
2.87638e-19	45	82	4.71728	GO:0042743 Hydrogen peroxide metabolic process	TC01V2_G000540 TC02V2_G004790 TC05V2_G004670 TC05V2_G006930 TC02V2_G003150 TC02V2_G007710 TC02V2_G011740 TC02V2_G011750 TC02V2_G011760 TC02V2_G011770 TC02V2_G011780 TC02V2_G011800 TC02V2_G011810 TC02V2_G025710 TC02V2_G025720 TC02V2_G025730 TC02V2_G025740 TC02V2_G026910 TC02V2_G026920 TC02V2_G027400 TC03V2_G000310 TC03V2_G013850 TC03V2_G019390 TC04V2_G000210 TC04V2_G003210 TC04V2_G003220 TC04V2_G0…
8.12527e-19	755	4870	1.33263	GO:0044237 Cellular metabolic process	TC01V2_G000330 TC01V2_G000540 TC01V2_G000620 TC02V2_G002740 TC02V2_G004790 TC02V2_G005260 TC02V2_G005950 TC02V2_G007730 TC02V2_G008650 TC02V2_G008660 TC02V2_G009260 TC02V2_G012260 TC02V2_G012420 TC02V2_G012560 TC02V2_G017100 TC02V2_G017320 TC02V2_G017650 TC02V2_G017710 TC02V2_G018410 TC02V2_G020520 TC02V2_G022210 TC02V2_G022230 TC02V2_G022440 TC02V2_G027440 TC02V2_G028780 TC02V2_G029140 TC02V2_G0…
2.32366e-18	73	198	3.16921	GO:0044248 Cellular catabolic process	TC01V2_G000540 TC02V2_G004790 TC02V2_G008650 TC02V2_G008660 TC02V2_G027440 TC02V2_G029530 TC03V2_G019250 TC05V2_G004670 TC05V2_G006930 TC09V2_G003770 TC10V2_G014570 TC03V2_G006780 TC09V2_G021560 TC02V2_G003150 TC02V2_G005950 TC02V2_G007710 TC02V2_G008640 TC02V2_G011740 TC02V2_G011750 TC02V2_G011760 TC02V2_G011770 TC02V2_G011780 TC02V2_G011800 TC02V2_G011810 TC02V2_G020520 TC02V2_G022440 TC02V2_G0…
2.61668e-18	106	359	2.53808	GO:1901700 Response to oxygen-containing compound	TC01V2_G000540 TC02V2_G004790 TC03V2_G018980 TC03V2_G023470 TC05V2_G000660 TC05V2_G001730 TC05V2_G004670 TC05V2_G012050 TC05V2_G018130 TC08V2_G004850 TC09V2_G002940 TC09V2_G025970 TC09V2_G025980 TC09V2_G029190 TC10V2_G000030 TC10V2_G001240 TC03V2_G006670 TC03V2_G016600 TC09V2_G020080 TC02V2_G003750 TC02V2_G003860 TC02V2_G004620 TC02V2_G007010 TC02V2_G016860 TC03V2_G005950 TC03V2_G007020 TC03V2_G0…
4.85279e-17	84	260	2.77715	GO:0006520 Amino acid metabolic process	TC02V2_G005950 TC02V2_G008650 TC02V2_G008660 TC02V2_G009260 TC03V2_G011650 TC03V2_G018370 TC03V2_G019250 TC05V2_G001360 TC05V2_G011950 TC05V2_G020100 TC06V2_G002870 TC08V2_G004280 TC09V2_G024320 TC09V2_G025450 TC02V2_G029070 TC03V2_G006780 TC09V2_G021560 TC01V2_G000590 TC02V2_G002480 TC02V2_G002490 TC02V2_G007260 TC02V2_G008640 TC02V2_G008720 TC02V2_G008910 TC02V2_G008950 TC02V2_G011200 TC02V2_G0…
5.81357e-17	41	77	4.57706	GO:0042744 Hydrogen peroxide catabolic process	TC01V2_G000540 TC02V2_G004790 TC05V2_G004670 TC05V2_G006930 TC02V2_G003150 TC02V2_G007710 TC02V2_G011740 TC02V2_G011750 TC02V2_G011760 TC02V2_G011770 TC02V2_G011780 TC02V2_G011800 TC02V2_G011810 TC02V2_G025710 TC02V2_G025720 TC02V2_G025730 TC02V2_G025740 TC02V2_G026910 TC02V2_G026920 TC02V2_G027400 TC03V2_G000310 TC03V2_G013850 TC03V2_G019390 TC04V2_G000210 TC04V2_G003210 TC04V2_G003220 TC04V2_G0…
7.80858e-16	116	441	2.26106	GO:0009725 Response to hormone	TC03V2_G018980 TC05V2_G000660 TC05V2_G012050 TC05V2_G018130 TC08V2_G004850 TC10V2_G000030 TC10V2_G001240 TC03V2_G006670 TC03V2_G016600 TC09V2_G020080 TC02V2_G003750 TC02V2_G004620 TC02V2_G005500 TC02V2_G005510 TC02V2_G005520 TC02V2_G005530 TC02V2_G005550 TC02V2_G005560 TC02V2_G005580 TC02V2_G005610 TC02V2_G005620 TC02V2_G005630 TC02V2_G005640 TC02V2_G005660 TC02V2_G005670 TC02V2_G005680 TC02V2_G0…
8.99554e-16	116	442	2.25595	GO:0009719 Response to endogenous stimulus	TC03V2_G018980 TC05V2_G000660 TC05V2_G012050 TC05V2_G018130 TC08V2_G004850 TC10V2_G000030 TC10V2_G001240 TC03V2_G006670 TC03V2_G016600 TC09V2_G020080 TC02V2_G003750 TC02V2_G004620 TC02V2_G005500 TC02V2_G005510 TC02V2_G005520 TC02V2_G005530 TC02V2_G005550 TC02V2_G005560 TC02V2_G005580 TC02V2_G005610 TC02V2_G005620 TC02V2_G005630 TC02V2_G005640 TC02V2_G005660 TC02V2_G005670 TC02V2_G005680 TC02V2_G0…
1.97256e-15	68	197	2.96712	GO:0006091 Generation of precursor metabolites and energy	TC01V2_G000620 TC02V2_G017100 TC02V2_G017710 TC02V2_G018410 TC02V2_G027440 TC03V2_G009260 TC03V2_G015500 TC03V2_G019320 TC04V2_G002430 TC05V2_G001500 TC05V2_G005370 TC05V2_G017700 TC06V2_G006020 TC09V2_G004540 TC09V2_G012740 TC10V2_G005860 TC02V2_G002650 TC02V2_G003540 TC02V2_G005320 TC02V2_G005990 TC02V2_G006020 TC02V2_G006660 TC02V2_G007320 TC02V2_G011830 TC02V2_G012720 TC02V2_G014400 TC02V2_G0…
7.63511e-14	55	149	3.173	GO:1901605 Alpha-amino acid metabolic process	TC02V2_G005950 TC02V2_G008650 TC02V2_G008660 TC02V2_G009260 TC03V2_G018370 TC03V2_G019250 TC05V2_G011950 TC05V2_G020100 TC06V2_G002870 TC08V2_G004280 TC09V2_G024320 TC09V2_G025450 TC02V2_G029070 TC03V2_G006780 TC09V2_G021560 TC01V2_G000590 TC02V2_G007260 TC02V2_G008640 TC02V2_G008720 TC02V2_G008910 TC02V2_G008950 TC02V2_G012230 TC02V2_G022440 TC02V2_G025960 TC02V2_G027910 TC03V2_G001100 TC03V2_G0…
3.013e-13	113	459	2.11621	GO:0051641 Cellular localization	TC02V2_G002920 TC02V2_G009470 TC02V2_G012930 TC02V2_G017430 TC02V2_G021990 TC03V2_G006410 TC03V2_G010680 TC03V2_G015530 TC03V2_G017970 TC03V2_G021840 TC03V2_G025730 TC04V2_G000980 TC04V2_G003190 TC05V2_G000820 TC05V2_G003410 TC05V2_G012620 TC05V2_G021020 TC05V2_G021640 TC05V2_G026730 TC06V2_G002420 TC08V2_G002370 TC09V2_G002880 TC09V2_G008530 TC09V2_G023870 TC10V2_G006980 TC10V2_G014570 TC02V2_G0…
3.37313e-13	74	246	2.58577	GO:0055086 Nucleobase-containing small molecule metabolic process	TC02V2_G017100 TC02V2_G018410 TC02V2_G027440 TC03V2_G000670 TC03V2_G009260 TC03V2_G019320 TC03V2_G025400 TC04V2_G001140 TC04V2_G002430 TC04V2_G008660 TC09V2_G008070 TC10V2_G000220 TC10V2_G005570 TC10V2_G009710 TC02V2_G028210 TC10V2_G001090 TC01V2_G000160 TC02V2_G000010 TC02V2_G000550 TC02V2_G005320 TC02V2_G006020 TC02V2_G010610 TC02V2_G012420 TC02V2_G012720 TC02V2_G013180 TC02V2_G016230 TC02V2_G0…
1.07157e-11	93	366	2.18421	GO:0019637 Organophosphate metabolic process	TC02V2_G017100 TC02V2_G018410 TC02V2_G027440 TC03V2_G000670 TC03V2_G009260 TC03V2_G019320 TC03V2_G025400 TC04V2_G001140 TC04V2_G002430 TC04V2_G008660 TC05V2_G001360 TC05V2_G002170 TC06V2_G001500 TC09V2_G008070 TC10V2_G000220 TC10V2_G005570 TC10V2_G007970 TC10V2_G009710 TC02V2_G028210 TC10V2_G001090 TC01V2_G000160 TC02V2_G000010 TC02V2_G000550 TC02V2_G005320 TC02V2_G006020 TC02V2_G007360 TC02V2_G0…
2.18876e-11	66	223	2.54409	GO:0006753 Nucleoside phosphate metabolic process	TC02V2_G017100 TC02V2_G018410 TC02V2_G027440 TC03V2_G000670 TC03V2_G009260 TC03V2_G019320 TC03V2_G025400 TC04V2_G001140 TC04V2_G002430 TC04V2_G008660 TC09V2_G008070 TC10V2_G000220 TC10V2_G005570 TC10V2_G009710 TC02V2_G028210 TC10V2_G001090 TC01V2_G000160 TC02V2_G000010 TC02V2_G000550 TC02V2_G005320 TC02V2_G006020 TC02V2_G010610 TC02V2_G012420 TC02V2_G012720 TC02V2_G016230 TC02V2_G018570 TC02V2_G0…
3.06177e-11	81	305	2.28285	GO:0046907 Intracellular transport	TC02V2_G002920 TC02V2_G009470 TC02V2_G017430 TC02V2_G021990 TC03V2_G006410 TC03V2_G010680 TC03V2_G015530 TC03V2_G017970 TC03V2_G021840 TC03V2_G025730 TC04V2_G000980 TC04V2_G003190 TC05V2_G000820 TC05V2_G003410 TC05V2_G021020 TC05V2_G021640 TC05V2_G026730 TC06V2_G002420 TC09V2_G002880 TC09V2_G023870 TC10V2_G006980 TC05V2_G009180 TC05V2_G017880 TC07V2_G003890 TC08V2_G000590 TC02V2_G004380 TC02V2_G0…
4.46063e-11	175	886	1.69784	GO:0051716 Cellular response to stimulus	TC02V2_G004790 TC02V2_G007010 TC02V2_G009220 TC02V2_G009440 TC02V2_G011150 TC02V2_G012260 TC02V2_G023720 TC03V2_G001110 TC03V2_G005950 TC03V2_G008260 TC03V2_G012170 TC03V2_G018980 TC03V2_G023820 TC04V2_G001130 TC04V2_G004340 TC05V2_G000660 TC05V2_G004580 TC05V2_G004670 TC05V2_G006930 TC05V2_G009500 TC05V2_G012050 TC05V2_G013420 TC05V2_G020300 TC08V2_G002650 TC08V2_G004850 TC09V2_G009070 TC09V2_G0…
5.61674e-11	78	292	2.29617	GO:0006811 Monoatomic ion transport	TC03V2_G018020 TC05V2_G024930 TC07V2_G008420 TC09V2_G004540 TC09V2_G020330 TC09V2_G029630 TC02V2_G000500 TC02V2_G001960 TC02V2_G005940 TC02V2_G006300 TC02V2_G007240 TC02V2_G015230 TC02V2_G018570 TC02V2_G026000 TC02V2_G029240 TC03V2_G000600 TC03V2_G000990 TC03V2_G004720 TC03V2_G005310 TC03V2_G013280 TC03V2_G016110 TC03V2_G020420 TC03V2_G023170 TC03V2_G024240 TC03V2_G024250 TC04V2_G000540 TC04V2_G0…
6.83568e-11	67	234	2.46123	GO:0016053 Organic acid biosynthetic process	TC03V2_G018370 TC05V2_G011950 TC05V2_G020100 TC06V2_G002870 TC06V2_G006570 TC09V2_G024320 TC09V2_G025450 TC10V2_G000510 TC10V2_G003520 TC02V2_G029070 TC08V2_G001490 TC09V2_G006890 TC01V2_G000590 TC02V2_G006850 TC02V2_G007260 TC02V2_G008720 TC02V2_G008910 TC02V2_G008950 TC02V2_G011200 TC02V2_G012230 TC02V2_G020260 TC02V2_G023820 TC02V2_G028780 TC03V2_G001100 TC03V2_G004620 TC03V2_G014090 TC03V2_G0…
6.83568e-11	67	234	2.46123	GO:0046394 Carboxylic acid biosynthetic process	TC03V2_G018370 TC05V2_G011950 TC05V2_G020100 TC06V2_G002870 TC06V2_G006570 TC09V2_G024320 TC09V2_G025450 TC10V2_G000510 TC10V2_G003520 TC02V2_G029070 TC08V2_G001490 TC09V2_G006890 TC01V2_G000590 TC02V2_G006850 TC02V2_G007260 TC02V2_G008720 TC02V2_G008910 TC02V2_G008950 TC02V2_G011200 TC02V2_G012230 TC02V2_G020260 TC02V2_G023820 TC02V2_G028780 TC03V2_G001100 TC03V2_G004620 TC03V2_G014090 TC03V2_G0…
1.14949e-10	81	313	2.22451	GO:0051649 Establishment of localization in cell	TC02V2_G002920 TC02V2_G009470 TC02V2_G017430 TC02V2_G021990 TC03V2_G006410 TC03V2_G010680 TC03V2_G015530 TC03V2_G017970 TC03V2_G021840 TC03V2_G025730 TC04V2_G000980 TC04V2_G003190 TC05V2_G000820 TC05V2_G003410 TC05V2_G021020 TC05V2_G021640 TC05V2_G026730 TC06V2_G002420 TC09V2_G002880 TC09V2_G023870 TC10V2_G006980 TC05V2_G009180 TC05V2_G017880 TC07V2_G003890 TC08V2_G000590 TC02V2_G004380 TC02V2_G0…
1.70837e-10	89	361	2.11922	GO:0070727 Cellular macromolecule localization	TC02V2_G002920 TC02V2_G009470 TC02V2_G012930 TC02V2_G021990 TC03V2_G006410 TC03V2_G010680 TC03V2_G017970 TC03V2_G021840 TC03V2_G025730 TC04V2_G000980 TC04V2_G003190 TC05V2_G000820 TC05V2_G012620 TC05V2_G021640 TC05V2_G026730 TC06V2_G002420 TC08V2_G002370 TC09V2_G008530 TC10V2_G006980 TC10V2_G014570 TC02V2_G014400 TC03V2_G009930 TC05V2_G005030 TC05V2_G009180 TC05V2_G017880 TC07V2_G003890 TC09V2_G0…
1.82955e-10	40	106	3.24375	GO:0006970 Response to osmotic stress	TC09V2_G025970 TC09V2_G025980 TC03V2_G006670 TC10V2_G005610 TC02V2_G012560 TC02V2_G016860 TC03V2_G000670 TC03V2_G005950 TC03V2_G007020 TC03V2_G012170 TC03V2_G016010 TC05V2_G011950 TC05V2_G020250 TC08V2_G000140 TC09V2_G010560 TC09V2_G011170 TC09V2_G022030 TC09V2_G023320 TC10V2_G003040 TC10V2_G003280 TC10V2_G011010 TC02V2_G026220 TC03V2_G006250 TC03V2_G024320 TC05V2_G020780 TC05V2_G025150 TC07V2_G0…
2.54742e-10	88	358	2.11297	GO:0008104 Protein localization	TC02V2_G002920 TC02V2_G009470 TC02V2_G012930 TC02V2_G021990 TC03V2_G006410 TC03V2_G010680 TC03V2_G017970 TC03V2_G021840 TC03V2_G025730 TC04V2_G000980 TC04V2_G003190 TC05V2_G000820 TC05V2_G012620 TC05V2_G021640 TC05V2_G026730 TC06V2_G002420 TC08V2_G002370 TC09V2_G008530 TC10V2_G006980 TC10V2_G014570 TC02V2_G014400 TC03V2_G009930 TC05V2_G005030 TC05V2_G009180 TC05V2_G017880 TC07V2_G003890 TC09V2_G0…
2.95951e-10	54	174	2.6677	GO:0072521 Purine-containing compound metabolic process	TC02V2_G017100 TC02V2_G018410 TC02V2_G027440 TC03V2_G000670 TC03V2_G009260 TC03V2_G019320 TC03V2_G025400 TC04V2_G001140 TC04V2_G002430 TC09V2_G008070 TC10V2_G000220 TC10V2_G005570 TC01V2_G000160 TC02V2_G000550 TC02V2_G005320 TC02V2_G006020 TC02V2_G012420 TC02V2_G012720 TC02V2_G013180 TC02V2_G016230 TC02V2_G018570 TC02V2_G020430 TC02V2_G020820 TC02V2_G024220 TC03V2_G007660 TC03V2_G008360 TC03V2_G0…
4.02478e-10	36	91	3.40059	GO:0009636 Response to toxic substance	TC01V2_G000540 TC02V2_G004790 TC02V2_G020520 TC02V2_G022490 TC02V2_G022530 TC02V2_G022550 TC02V2_G025720 TC02V2_G027080 TC03V2_G003340 TC03V2_G003350 TC03V2_G003360 TC03V2_G021980 TC03V2_G022660 TC03V2_G023220 TC04V2_G000210 TC04V2_G001130 TC05V2_G004670 TC05V2_G004950 TC05V2_G006930 TC05V2_G008760 TC05V2_G012580 TC05V2_G012880 TC05V2_G019920 TC05V2_G020780 TC07V2_G002640 TC07V2_G007570 TC07V2_G0…
5.15701e-10	103	452	1.95881	GO:0033036 Macromolecule localization	TC02V2_G002920 TC02V2_G009470 TC02V2_G012930 TC02V2_G021990 TC03V2_G006410 TC03V2_G010680 TC03V2_G017970 TC03V2_G021840 TC03V2_G025730 TC04V2_G000980 TC04V2_G003190 TC05V2_G000820 TC05V2_G009380 TC05V2_G012620 TC05V2_G021640 TC05V2_G026730 TC06V2_G002420 TC07V2_G003690 TC08V2_G002370 TC09V2_G008530 TC10V2_G006980 TC10V2_G014570 TC02V2_G014400 TC03V2_G009930 TC05V2_G005030 TC05V2_G009180 TC05V2_G0…
6.14512e-10	68	251	2.32878	GO:0006812 Monoatomic cation transport	TC03V2_G018020 TC05V2_G024930 TC07V2_G008420 TC09V2_G004540 TC09V2_G020330 TC09V2_G029630 TC02V2_G000500 TC02V2_G001960 TC02V2_G005940 TC02V2_G006300 TC02V2_G007240 TC02V2_G018570 TC02V2_G026000 TC02V2_G029240 TC03V2_G000600 TC03V2_G004720 TC03V2_G020420 TC03V2_G023170 TC03V2_G024240 TC03V2_G024250 TC04V2_G000540 TC04V2_G003860 TC04V2_G006050 TC05V2_G000700 TC05V2_G000890 TC05V2_G001440 TC05V2_G0…
6.79072e-10	76	296	2.20706	GO:0044283 Small molecule biosynthetic process	TC03V2_G018370 TC05V2_G001360 TC05V2_G002170 TC05V2_G011950 TC05V2_G020100 TC06V2_G002870 TC06V2_G006570 TC09V2_G024320 TC09V2_G025450 TC10V2_G000510 TC10V2_G003520 TC02V2_G029070 TC08V2_G001490 TC09V2_G006890 TC01V2_G000590 TC02V2_G006850 TC02V2_G007260 TC02V2_G008720 TC02V2_G008910 TC02V2_G008950 TC02V2_G011200 TC02V2_G012230 TC02V2_G020260 TC02V2_G023820 TC02V2_G028780 TC03V2_G001100 TC03V2_G0…
1.27941e-09	44	131	2.88718	GO:0033365 Protein localization to organelle	TC02V2_G009470 TC02V2_G012930 TC03V2_G010680 TC03V2_G017970 TC04V2_G003190 TC05V2_G000820 TC06V2_G002420 TC08V2_G002370 TC02V2_G014400 TC03V2_G009930 TC05V2_G017880 TC09V2_G024360 TC02V2_G004110 TC02V2_G004380 TC02V2_G023670 TC02V2_G025610 TC02V2_G029280 TC03V2_G011510 TC03V2_G016710 TC03V2_G016720 TC04V2_G007910 TC05V2_G004860 TC05V2_G007860 TC05V2_G014210 TC05V2_G017590 TC05V2_G017790 TC05V2_G0…
1.61569e-09	212	1181	1.54305	GO:0071840 Cellular component organization or biogenesis	TC02V2_G002920 TC02V2_G005300 TC02V2_G005840 TC02V2_G009440 TC02V2_G009700 TC02V2_G015880 TC02V2_G017650 TC02V2_G023720 TC03V2_G000780 TC03V2_G003520 TC03V2_G003980 TC03V2_G013370 TC03V2_G014710 TC03V2_G014720 TC03V2_G017970 TC03V2_G019750 TC03V2_G021440 TC03V2_G021460 TC03V2_G023140 TC03V2_G023270 TC03V2_G025730 TC03V2_G025950 TC04V2_G000590 TC04V2_G001450 TC04V2_G002470 TC04V2_G004340 TC04V2_G0…
3.04504e-09	38	106	3.08156	GO:0072594 Establishment of protein localization to organelle	TC02V2_G009470 TC02V2_G012930 TC03V2_G010680 TC03V2_G017970 TC04V2_G003190 TC05V2_G000820 TC06V2_G002420 TC02V2_G014400 TC05V2_G017880 TC09V2_G024360 TC02V2_G004110 TC02V2_G004380 TC02V2_G023670 TC02V2_G025610 TC02V2_G029280 TC03V2_G011510 TC03V2_G016710 TC03V2_G016720 TC05V2_G004860 TC05V2_G007860 TC05V2_G014210 TC05V2_G017790 TC05V2_G020750 TC05V2_G022540 TC05V2_G026600 TC05V2_G027020 TC08V2_G0…
4.63033e-09	43	131	2.82157	GO:0170033 L-amino acid metabolic process	TC02V2_G009260 TC03V2_G018370 TC03V2_G019250 TC05V2_G011950 TC05V2_G020100 TC06V2_G002870 TC08V2_G004280 TC09V2_G024320 TC09V2_G021560 TC01V2_G000590 TC02V2_G005950 TC02V2_G007260 TC02V2_G008720 TC02V2_G008910 TC02V2_G008950 TC02V2_G012230 TC02V2_G022440 TC02V2_G025960 TC03V2_G004620 TC03V2_G006840 TC03V2_G009830 TC03V2_G014090 TC03V2_G016250 TC04V2_G004560 TC05V2_G005360 TC05V2_G011590 TC05V2_G0…
4.63033e-09	20	35	4.91196	GO:0000302 Response to reactive oxygen species	TC01V2_G000540 TC02V2_G004790 TC05V2_G004670 TC09V2_G002940 TC09V2_G025970 TC09V2_G025980 TC05V2_G012880 TC05V2_G020780 TC06V2_G000400 TC10V2_G014220 TC03V2_G004850 TC04V2_G004620 TC05V2_G000700 TC05V2_G023780 TC05V2_G025150 TC10V2_G000640 TC02V2_G029620 TC02V2_G014080 TC03V2_G010100 TC03V2_G011710
5.53362e-09	83	350	2.03846	GO:0070887 Cellular response to chemical stimulus	TC02V2_G004790 TC03V2_G001110 TC03V2_G012170 TC03V2_G018980 TC04V2_G001130 TC05V2_G000660 TC05V2_G004670 TC05V2_G006930 TC05V2_G012050 TC08V2_G004850 TC09V2_G029190 TC10V2_G000030 TC10V2_G010520 TC09V2_G020080 TC01V2_G000540 TC02V2_G003750 TC02V2_G004620 TC02V2_G007010 TC02V2_G016860 TC02V2_G020880 TC02V2_G025720 TC03V2_G000130 TC03V2_G009310 TC03V2_G016010 TC03V2_G016070 TC03V2_G017710 TC03V2_G0…
5.84299e-09	79	327	2.07669	GO:0045184 Establishment of protein localization	TC02V2_G002920 TC02V2_G009470 TC02V2_G012930 TC02V2_G021990 TC03V2_G006410 TC03V2_G010680 TC03V2_G017970 TC03V2_G021840 TC03V2_G025730 TC04V2_G000980 TC04V2_G003190 TC05V2_G000820 TC05V2_G021640 TC05V2_G026730 TC06V2_G002420 TC10V2_G006980 TC02V2_G014400 TC05V2_G005030 TC05V2_G009180 TC05V2_G017880 TC07V2_G003890 TC09V2_G024360 TC02V2_G004110 TC02V2_G004380 TC02V2_G006250 TC02V2_G009610 TC02V2_G0…
5.8514e-09	44	137	2.76074	GO:0006163 Purine nucleotide metabolic process	TC02V2_G017100 TC02V2_G018410 TC02V2_G027440 TC03V2_G009260 TC03V2_G019320 TC03V2_G025400 TC04V2_G001140 TC04V2_G002430 TC09V2_G008070 TC10V2_G000220 TC10V2_G005570 TC02V2_G000550 TC02V2_G005320 TC02V2_G006020 TC02V2_G012720 TC02V2_G016230 TC02V2_G018570 TC02V2_G020430 TC02V2_G024220 TC03V2_G007660 TC03V2_G008360 TC03V2_G010100 TC03V2_G015720 TC03V2_G017050 TC03V2_G019660 TC03V2_G024320 TC03V2_G0…
5.85248e-09	33	86	3.29844	GO:0098754 Detoxification	TC01V2_G000540 TC02V2_G004790 TC02V2_G020520 TC02V2_G022490 TC02V2_G022530 TC02V2_G022550 TC02V2_G025720 TC02V2_G027080 TC03V2_G003340 TC03V2_G003350 TC03V2_G003360 TC03V2_G021980 TC03V2_G022660 TC03V2_G023220 TC04V2_G000210 TC04V2_G001130 TC05V2_G004670 TC05V2_G004950 TC05V2_G006930 TC05V2_G008760 TC05V2_G012580 TC05V2_G012880 TC05V2_G019920 TC05V2_G020780 TC07V2_G002640 TC07V2_G007570 TC07V2_G0…
5.85248e-09	46	147	2.68988	GO:0009733 Response to auxin	TC02V2_G005500 TC02V2_G005510 TC02V2_G005520 TC02V2_G005530 TC02V2_G005550 TC02V2_G005560 TC02V2_G005580 TC02V2_G005610 TC02V2_G005620 TC02V2_G005630 TC02V2_G005640 TC02V2_G005660 TC02V2_G005670 TC02V2_G005680 TC02V2_G005690 TC02V2_G005700 TC02V2_G005710 TC02V2_G005720 TC02V2_G005730 TC02V2_G005750 TC02V2_G005760 TC02V2_G005770 TC02V2_G005780 TC02V2_G005820 TC03V2_G008270 TC03V2_G018820 TC03V2_G0…
1.11542e-08	59	218	2.32642	GO:0032787 Monocarboxylic acid metabolic process	TC02V2_G018410 TC02V2_G027440 TC03V2_G009260 TC03V2_G019320 TC09V2_G003770 TC10V2_G000510 TC10V2_G003520 TC08V2_G001490 TC09V2_G006890 TC02V2_G002160 TC02V2_G005320 TC02V2_G006020 TC02V2_G006850 TC02V2_G012720 TC02V2_G020260 TC02V2_G020820 TC02V2_G023820 TC03V2_G015720 TC03V2_G020600 TC03V2_G021300 TC03V2_G024850 TC03V2_G025230 TC04V2_G000680 TC04V2_G004410 TC05V2_G005360 TC05V2_G006780 TC05V2_G0…
1.16075e-08	183	1007	1.56212	GO:0016043 Cellular component organization	TC02V2_G002920 TC02V2_G005300 TC02V2_G009440 TC02V2_G009700 TC02V2_G015880 TC02V2_G023720 TC03V2_G003520 TC03V2_G003980 TC03V2_G014710 TC03V2_G014720 TC03V2_G017970 TC03V2_G019750 TC03V2_G021440 TC03V2_G021460 TC03V2_G023140 TC03V2_G023270 TC03V2_G025730 TC04V2_G000590 TC04V2_G001450 TC04V2_G002470 TC04V2_G004340 TC04V2_G007400 TC05V2_G003750 TC05V2_G003760 TC05V2_G004580 TC05V2_G014140 TC05V2_G0…
1.72448e-08	49	167	2.52216	GO:0009117 Nucleotide metabolic process	TC02V2_G017100 TC02V2_G018410 TC02V2_G027440 TC03V2_G009260 TC03V2_G019320 TC03V2_G025400 TC04V2_G001140 TC04V2_G002430 TC09V2_G008070 TC10V2_G000220 TC10V2_G005570 TC02V2_G000010 TC02V2_G000550 TC02V2_G005320 TC02V2_G006020 TC02V2_G010610 TC02V2_G012720 TC02V2_G016230 TC02V2_G018570 TC02V2_G020430 TC02V2_G024220 TC03V2_G007660 TC03V2_G008360 TC03V2_G010100 TC03V2_G010350 TC03V2_G015720 TC03V2_G0…
1.80268e-08	57	210	2.33318	GO:0043207 Response to external biotic stimulus	TC01V2_G000700 TC02V2_G003850 TC05V2_G012050 TC02V2_G011910 TC03V2_G011710 TC03V2_G015440 TC02V2_G002160 TC02V2_G007010 TC02V2_G012210 TC02V2_G012230 TC02V2_G012560 TC03V2_G015620 TC03V2_G024080 TC03V2_G025410 TC05V2_G008850 TC05V2_G023440 TC06V2_G000400 TC06V2_G001770 TC06V2_G002080 TC06V2_G007130 TC08V2_G005380 TC09V2_G003980 TC09V2_G012550 TC09V2_G013760 TC09V2_G030040 TC02V2_G022320 TC02V2_G0…
1.80268e-08	57	210	2.33318	GO:0051707 Response to other organism	TC01V2_G000700 TC02V2_G003850 TC05V2_G012050 TC02V2_G011910 TC03V2_G011710 TC03V2_G015440 TC02V2_G002160 TC02V2_G007010 TC02V2_G012210 TC02V2_G012230 TC02V2_G012560 TC03V2_G015620 TC03V2_G024080 TC03V2_G025410 TC05V2_G008850 TC05V2_G023440 TC06V2_G000400 TC06V2_G001770 TC06V2_G002080 TC06V2_G007130 TC08V2_G005380 TC09V2_G003980 TC09V2_G012550 TC09V2_G013760 TC09V2_G030040 TC02V2_G022320 TC02V2_G0…
1.80268e-08	47	157	2.57331	GO:0098660 Inorganic ion transmembrane transport	TC03V2_G018020 TC05V2_G000890 TC05V2_G024930 TC07V2_G008420 TC09V2_G004540 TC09V2_G029190 TC09V2_G029630 TC10V2_G007090 TC01V2_G000210 TC02V2_G001960 TC02V2_G005940 TC02V2_G006300 TC02V2_G012250 TC02V2_G018570 TC03V2_G004720 TC03V2_G011380 TC03V2_G017710 TC03V2_G020420 TC04V2_G003860 TC04V2_G003870 TC04V2_G006050 TC05V2_G014790 TC05V2_G018250 TC05V2_G022260 TC05V2_G023620 TC05V2_G023630 TC05V2_G0…
1.83174e-08	249	1481	1.44523	GO:0006796 Phosphate-containing compound metabolic process	TC02V2_G002740 TC02V2_G012260 TC02V2_G017100 TC02V2_G018410 TC02V2_G022210 TC02V2_G027440 TC03V2_G000670 TC03V2_G002390 TC03V2_G003520 TC03V2_G005950 TC03V2_G009260 TC03V2_G019320 TC03V2_G025400 TC04V2_G001140 TC04V2_G002430 TC04V2_G008660 TC05V2_G001360 TC05V2_G002170 TC05V2_G009500 TC05V2_G013420 TC05V2_G015030 TC05V2_G015040 TC05V2_G022590 TC06V2_G001500 TC06V2_G003580 TC09V2_G008070 TC09V2_G0…
1.83174e-08	28	68	3.5395	GO:0009414 Response to water deprivation	TC03V2_G023470 TC05V2_G001730 TC03V2_G005950 TC03V2_G007020 TC05V2_G000020 TC05V2_G003750 TC05V2_G003760 TC05V2_G009610 TC09V2_G014760 TC09V2_G023450 TC09V2_G027340 TC09V2_G027890 TC10V2_G003040 TC10V2_G003820 TC10V2_G005180 TC10V2_G011010 TC02V2_G026220 TC03V2_G024320 TC02V2_G014400 TC02V2_G027730 TC03V2_G002170 TC05V2_G024130 TC06V2_G000370 TC09V2_G000520 TC09V2_G008890 TC09V2_G020380 TC09V2_G0…
1.92526e-08	249	1482	1.44426	GO:0006793 Phosphorus metabolic process	TC02V2_G002740 TC02V2_G012260 TC02V2_G017100 TC02V2_G018410 TC02V2_G022210 TC02V2_G027440 TC03V2_G000670 TC03V2_G002390 TC03V2_G003520 TC03V2_G005950 TC03V2_G009260 TC03V2_G019320 TC03V2_G025400 TC04V2_G001140 TC04V2_G002430 TC04V2_G008660 TC05V2_G001360 TC05V2_G002170 TC05V2_G009500 TC05V2_G013420 TC05V2_G015030 TC05V2_G015040 TC05V2_G022590 TC06V2_G001500 TC06V2_G003580 TC09V2_G008070 TC09V2_G0…
1.93909e-08	74	307	2.07198	GO:0015031 Protein transport	TC02V2_G002920 TC02V2_G009470 TC02V2_G012930 TC02V2_G021990 TC03V2_G006410 TC03V2_G010680 TC03V2_G017970 TC03V2_G021840 TC03V2_G025730 TC04V2_G000980 TC04V2_G003190 TC05V2_G000820 TC05V2_G021640 TC05V2_G026730 TC06V2_G002420 TC10V2_G006980 TC02V2_G014400 TC05V2_G009180 TC05V2_G017880 TC07V2_G003890 TC09V2_G024360 TC02V2_G004110 TC02V2_G004380 TC02V2_G006250 TC02V2_G009610 TC02V2_G010690 TC02V2_G0…
1.93909e-08	91	409	1.91254	GO:0071705 Nitrogen compound transport	TC02V2_G002920 TC02V2_G009470 TC02V2_G012930 TC02V2_G021990 TC03V2_G006410 TC03V2_G010680 TC03V2_G017970 TC03V2_G021840 TC03V2_G025730 TC04V2_G000980 TC04V2_G003190 TC05V2_G000820 TC05V2_G000890 TC05V2_G021640 TC05V2_G026730 TC06V2_G002420 TC09V2_G029190 TC10V2_G006980 TC02V2_G011030 TC02V2_G014400 TC05V2_G009180 TC05V2_G017880 TC07V2_G003890 TC09V2_G024360 TC02V2_G004110 TC02V2_G004380 TC02V2_G0…
1.93909e-08	33	90	3.15184	GO:0009651 Response to salt stress	TC09V2_G025970 TC09V2_G025980 TC03V2_G006670 TC10V2_G005610 TC02V2_G012560 TC03V2_G000670 TC03V2_G007020 TC03V2_G012170 TC03V2_G016010 TC05V2_G011950 TC05V2_G020250 TC08V2_G000140 TC09V2_G010560 TC09V2_G022030 TC09V2_G023320 TC10V2_G003040 TC10V2_G003280 TC02V2_G026220 TC03V2_G006250 TC03V2_G024320 TC05V2_G020780 TC05V2_G025150 TC09V2_G020380 TC02V2_G012250 TC02V2_G027730 TC04V2_G003870 TC05V2_G0…
2.54988e-08	128	647	1.70059	GO:0005975 Carbohydrate metabolic process	TC02V2_G005360 TC02V2_G017100 TC02V2_G017650 TC02V2_G018410 TC02V2_G027440 TC03V2_G005020 TC03V2_G009260 TC03V2_G019320 TC04V2_G002430 TC04V2_G004480 TC04V2_G007360 TC05V2_G002170 TC05V2_G004160 TC07V2_G002620 TC08V2_G003680 TC09V2_G012890 TC10V2_G003800 TC01V2_G000700 TC02V2_G003850 TC02V2_G005320 TC02V2_G005990 TC02V2_G006020 TC02V2_G006050 TC02V2_G006660 TC02V2_G012440 TC02V2_G012720 TC02V2_G0…
2.54988e-08	56	207	2.32547	GO:0006886 Intracellular protein transport	TC02V2_G002920 TC02V2_G009470 TC02V2_G021990 TC03V2_G006410 TC03V2_G010680 TC03V2_G017970 TC03V2_G021840 TC03V2_G025730 TC04V2_G000980 TC04V2_G003190 TC05V2_G000820 TC05V2_G021640 TC05V2_G026730 TC06V2_G002420 TC05V2_G009180 TC05V2_G017880 TC07V2_G003890 TC02V2_G004380 TC02V2_G006250 TC02V2_G015040 TC02V2_G025610 TC02V2_G029280 TC03V2_G004040 TC03V2_G007730 TC03V2_G016710 TC03V2_G016720 TC04V2_G0…
2.54988e-08	58	218	2.28699	GO:0009607 Response to biotic stimulus	TC01V2_G000700 TC02V2_G003850 TC05V2_G012050 TC02V2_G011910 TC03V2_G011710 TC03V2_G015440 TC01V2_G000250 TC02V2_G002160 TC02V2_G007010 TC02V2_G012210 TC02V2_G012230 TC02V2_G012560 TC03V2_G015620 TC03V2_G024080 TC03V2_G025410 TC05V2_G008850 TC05V2_G023440 TC06V2_G000400 TC06V2_G001770 TC06V2_G002080 TC06V2_G007130 TC08V2_G005380 TC09V2_G003980 TC09V2_G012550 TC09V2_G013760 TC09V2_G030040 TC02V2_G0…
2.76334e-08	57	213	2.30032	GO:0044419 Biological process involved in interspecies interaction between organisms	TC01V2_G000700 TC02V2_G003850 TC05V2_G012050 TC02V2_G011910 TC03V2_G011710 TC03V2_G015440 TC02V2_G002160 TC02V2_G007010 TC02V2_G012210 TC02V2_G012230 TC02V2_G012560 TC03V2_G015620 TC03V2_G024080 TC03V2_G025410 TC05V2_G008850 TC05V2_G023440 TC06V2_G000400 TC06V2_G001770 TC06V2_G002080 TC06V2_G007130 TC08V2_G005380 TC09V2_G003980 TC09V2_G012550 TC09V2_G013760 TC09V2_G030040 TC02V2_G022320 TC02V2_G0…
3.00925e-08	13	17	6.57336	GO:0042044 Fluid transport	TC03V2_G005540 TC03V2_G012860 TC05V2_G006060 TC10V2_G004290 TC02V2_G004580 TC03V2_G017710 TC03V2_G023470 TC05V2_G001730 TC05V2_G005230 TC05V2_G009610 TC05V2_G021630 TC05V2_G009180 TC05V2_G025680
3.00925e-08	13	17	6.57336	GO:0006833 Water transport	TC03V2_G005540 TC03V2_G012860 TC05V2_G006060 TC10V2_G004290 TC02V2_G004580 TC03V2_G017710 TC03V2_G023470 TC05V2_G001730 TC05V2_G005230 TC05V2_G009610 TC05V2_G021630 TC05V2_G009180 TC05V2_G025680
3.08073e-08	29	74	3.36868	GO:0001101 Response to acid chemical	TC03V2_G023470 TC05V2_G001730 TC03V2_G005950 TC03V2_G007020 TC05V2_G000020 TC05V2_G003750 TC05V2_G003760 TC05V2_G009610 TC08V2_G005380 TC09V2_G014760 TC09V2_G023450 TC09V2_G027340 TC09V2_G027890 TC10V2_G003040 TC10V2_G003820 TC10V2_G005180 TC10V2_G011010 TC02V2_G026220 TC03V2_G024320 TC02V2_G014400 TC02V2_G027730 TC03V2_G002170 TC05V2_G024130 TC06V2_G000370 TC09V2_G000520 TC09V2_G008890 TC09V2_G0…
4.05847e-08	40	126	2.72887	GO:0170039 Proteinogenic amino acid metabolic process	TC03V2_G018370 TC03V2_G019250 TC05V2_G011950 TC05V2_G020100 TC06V2_G002870 TC09V2_G024320 TC09V2_G021560 TC01V2_G000590 TC02V2_G005950 TC02V2_G007260 TC02V2_G008720 TC02V2_G008910 TC02V2_G008950 TC02V2_G012230 TC02V2_G022440 TC02V2_G025960 TC03V2_G004620 TC03V2_G006840 TC03V2_G014090 TC03V2_G016250 TC04V2_G004560 TC05V2_G005360 TC05V2_G011590 TC05V2_G020400 TC06V2_G001410 TC07V2_G001500 TC07V2_G0…
4.51149e-08	33	93	3.05017	GO:0072524 Pyridine-containing compound metabolic process	TC02V2_G017100 TC02V2_G018410 TC02V2_G027440 TC03V2_G009260 TC03V2_G019320 TC03V2_G025400 TC04V2_G001140 TC04V2_G002430 TC05V2_G001360 TC10V2_G000220 TC02V2_G005320 TC02V2_G006020 TC02V2_G010610 TC02V2_G012720 TC02V2_G016230 TC02V2_G024220 TC03V2_G007660 TC03V2_G015720 TC03V2_G017050 TC03V2_G024320 TC05V2_G006780 TC05V2_G006940 TC05V2_G011810 TC05V2_G021260 TC05V2_G023800 TC06V2_G007290 TC08V2_G0…
8.88299e-08	31	86	3.09853	GO:0019362 Pyridine nucleotide metabolic process	TC02V2_G017100 TC02V2_G018410 TC02V2_G027440 TC03V2_G009260 TC03V2_G019320 TC03V2_G025400 TC04V2_G001140 TC04V2_G002430 TC10V2_G000220 TC02V2_G005320 TC02V2_G006020 TC02V2_G010610 TC02V2_G012720 TC02V2_G016230 TC02V2_G024220 TC03V2_G007660 TC03V2_G015720 TC03V2_G017050 TC03V2_G024320 TC05V2_G006780 TC05V2_G006940 TC05V2_G011810 TC05V2_G021260 TC05V2_G023800 TC08V2_G003620 TC09V2_G017090 TC09V2_G0…
9.99222e-08	28	73	3.29707	GO:0009415 Response to water	TC03V2_G023470 TC05V2_G001730 TC03V2_G005950 TC03V2_G007020 TC05V2_G000020 TC05V2_G003750 TC05V2_G003760 TC05V2_G009610 TC09V2_G014760 TC09V2_G023450 TC09V2_G027340 TC09V2_G027890 TC10V2_G003040 TC10V2_G003820 TC10V2_G005180 TC10V2_G011010 TC02V2_G026220 TC03V2_G024320 TC02V2_G014400 TC02V2_G027730 TC03V2_G002170 TC05V2_G024130 TC06V2_G000370 TC09V2_G000520 TC09V2_G008890 TC09V2_G020380 TC09V2_G0…
1.04805e-07	16	27	5.09389	GO:1901606 Alpha-amino acid catabolic process	TC02V2_G008650 TC02V2_G008660 TC03V2_G019250 TC03V2_G006780 TC09V2_G021560 TC02V2_G005950 TC02V2_G008640 TC02V2_G022440 TC02V2_G027910 TC03V2_G009830 TC05V2_G005360 TC07V2_G002830 TC07V2_G008370 TC09V2_G004690 TC09V2_G028910 TC03V2_G006250
1.44818e-07	23	53	3.73031	GO:0045333 Cellular respiration	TC01V2_G000620 TC03V2_G015500 TC05V2_G005370 TC05V2_G017700 TC06V2_G006020 TC09V2_G004540 TC09V2_G012740 TC02V2_G002650 TC02V2_G003540 TC02V2_G005990 TC03V2_G007420 TC04V2_G001140 TC04V2_G002360 TC04V2_G005340 TC05V2_G015560 TC07V2_G002830 TC07V2_G008540 TC08V2_G000560 TC10V2_G003960 TC10V2_G003970 TC10V2_G014530 TC02V2_G014080 TC09V2_G021560
1.93443e-07	30	84	3.06998	GO:0046496 Nicotinamide nucleotide metabolic process	TC02V2_G017100 TC02V2_G018410 TC02V2_G027440 TC03V2_G009260 TC03V2_G019320 TC03V2_G025400 TC04V2_G001140 TC04V2_G002430 TC10V2_G000220 TC02V2_G005320 TC02V2_G006020 TC02V2_G012720 TC02V2_G016230 TC02V2_G024220 TC03V2_G007660 TC03V2_G015720 TC03V2_G017050 TC03V2_G024320 TC05V2_G006780 TC05V2_G006940 TC05V2_G011810 TC05V2_G021260 TC05V2_G023800 TC08V2_G003620 TC09V2_G017090 TC09V2_G020000 TC09V2_G0…
1.93852e-07	25	62	3.4661	GO:0015980 Energy derivation by oxidation of organic compounds	TC01V2_G000620 TC03V2_G015500 TC05V2_G005370 TC05V2_G017700 TC06V2_G006020 TC09V2_G004540 TC09V2_G012740 TC02V2_G002650 TC02V2_G003540 TC02V2_G005990 TC02V2_G006660 TC03V2_G007420 TC04V2_G001140 TC04V2_G002360 TC04V2_G005340 TC05V2_G015560 TC07V2_G002830 TC07V2_G008540 TC08V2_G000560 TC08V2_G002470 TC10V2_G003960 TC10V2_G003970 TC10V2_G014530 TC02V2_G014080 TC09V2_G021560
2.51035e-07	33	99	2.86531	GO:0016052 Carbohydrate catabolic process	TC02V2_G005360 TC02V2_G018410 TC02V2_G027440 TC03V2_G005020 TC03V2_G009260 TC03V2_G019320 TC04V2_G007360 TC08V2_G003680 TC02V2_G003850 TC02V2_G005320 TC02V2_G006020 TC02V2_G012720 TC02V2_G013840 TC02V2_G023260 TC03V2_G015720 TC03V2_G019720 TC04V2_G002060 TC05V2_G006780 TC05V2_G006940 TC05V2_G009940 TC05V2_G011810 TC05V2_G015690 TC05V2_G017400 TC05V2_G021260 TC05V2_G024520 TC08V2_G003540 TC08V2_G0…
2.54029e-07	41	139	2.53549	GO:0042592 Homeostatic process	TC03V2_G000990 TC05V2_G006930 TC05V2_G008760 TC05V2_G013660 TC05V2_G024930 TC06V2_G006110 TC07V2_G008420 TC08V2_G002980 TC09V2_G010320 TC02V2_G012040 TC04V2_G000540 TC05V2_G012880 TC01V2_G000080 TC02V2_G003430 TC02V2_G003440 TC02V2_G022210 TC03V2_G001110 TC03V2_G013280 TC03V2_G022100 TC04V2_G001130 TC04V2_G003520 TC05V2_G000700 TC05V2_G001930 TC05V2_G014530 TC05V2_G021210 TC06V2_G001230 TC07V2_G0…
3.18997e-07	23	55	3.59466	GO:0016054 Organic acid catabolic process	TC02V2_G008650 TC02V2_G008660 TC02V2_G027440 TC03V2_G019250 TC03V2_G006780 TC09V2_G021560 TC02V2_G005950 TC02V2_G008640 TC02V2_G022440 TC02V2_G027910 TC03V2_G009830 TC03V2_G020600 TC04V2_G000680 TC05V2_G005360 TC05V2_G025290 TC07V2_G002830 TC07V2_G008370 TC09V2_G004690 TC09V2_G028910 TC08V2_G000590 TC03V2_G006250 TC03V2_G009930 TC06V2_G007710
3.18997e-07	23	55	3.59466	GO:0046395 Carboxylic acid catabolic process	TC02V2_G008650 TC02V2_G008660 TC02V2_G027440 TC03V2_G019250 TC03V2_G006780 TC09V2_G021560 TC02V2_G005950 TC02V2_G008640 TC02V2_G022440 TC02V2_G027910 TC03V2_G009830 TC03V2_G020600 TC04V2_G000680 TC05V2_G005360 TC05V2_G025290 TC07V2_G002830 TC07V2_G008370 TC09V2_G004690 TC09V2_G028910 TC08V2_G000590 TC03V2_G006250 TC03V2_G009930 TC06V2_G007710
3.57243e-07	28	77	3.12579	GO:0044282 Small molecule catabolic process	TC02V2_G008650 TC02V2_G008660 TC02V2_G027440 TC03V2_G005020 TC03V2_G019250 TC09V2_G003770 TC03V2_G006780 TC09V2_G021560 TC02V2_G005320 TC02V2_G005950 TC02V2_G008640 TC02V2_G022440 TC02V2_G027910 TC03V2_G009830 TC03V2_G020600 TC04V2_G000680 TC05V2_G005360 TC05V2_G012580 TC05V2_G024520 TC05V2_G025290 TC07V2_G002830 TC07V2_G008370 TC09V2_G004690 TC09V2_G028910 TC08V2_G000590 TC03V2_G006250 TC03V2_G0…
3.86137e-07	18	36	4.29797	GO:0062197 Cellular response to chemical stress	TC02V2_G004790 TC03V2_G001110 TC03V2_G012170 TC04V2_G001130 TC05V2_G004670 TC05V2_G006930 TC02V2_G016860 TC03V2_G016010 TC05V2_G012880 TC05V2_G020250 TC05V2_G020780 TC09V2_G002170 TC09V2_G022030 TC09V2_G028310 TC10V2_G003280 TC10V2_G014220 TC02V2_G029620 TC03V2_G024000
4.68117e-07	64	271	2.03004	GO:0009605 Response to external stimulus	TC01V2_G000700 TC02V2_G003850 TC05V2_G012050 TC02V2_G011910 TC03V2_G011710 TC03V2_G015440 TC02V2_G002160 TC02V2_G007010 TC02V2_G009410 TC02V2_G012210 TC02V2_G012230 TC02V2_G012560 TC03V2_G015620 TC03V2_G024080 TC03V2_G025410 TC05V2_G008850 TC05V2_G023440 TC05V2_G027580 TC06V2_G000400 TC06V2_G001770 TC06V2_G002080 TC06V2_G007130 TC08V2_G005380 TC09V2_G003980 TC09V2_G012550 TC09V2_G013760 TC09V2_G0…
4.85961e-07	22	52	3.63674	GO:1902600 Proton transmembrane transport	TC09V2_G004540 TC02V2_G005940 TC02V2_G006300 TC02V2_G018570 TC03V2_G020420 TC04V2_G003860 TC04V2_G006050 TC05V2_G018250 TC05V2_G024930 TC05V2_G026770 TC06V2_G002600 TC06V2_G003070 TC07V2_G008420 TC08V2_G002980 TC09V2_G000580 TC09V2_G008070 TC09V2_G011650 TC09V2_G012630 TC09V2_G015140 TC09V2_G021860 TC10V2_G004720 TC10V2_G005570
5.90431e-07	30	88	2.93043	GO:0071669 Plant-type cell wall organization or biogenesis	TC02V2_G017650 TC03V2_G025950 TC04V2_G008660 TC09V2_G012890 TC02V2_G012380 TC02V2_G028210 TC03V2_G007520 TC03V2_G008620 TC03V2_G008630 TC03V2_G008640 TC03V2_G008660 TC04V2_G007120 TC04V2_G007920 TC04V2_G008600 TC04V2_G008610 TC05V2_G003380 TC05V2_G006130 TC05V2_G017030 TC05V2_G021510 TC08V2_G002950 TC08V2_G004140 TC09V2_G026910 TC09V2_G030510 TC10V2_G002010 TC10V2_G002960 TC10V2_G009720 TC10V2_G0…
6.2706e-07	31	93	2.86531	GO:0048878 Chemical homeostasis	TC03V2_G000990 TC05V2_G013660 TC05V2_G024930 TC06V2_G006110 TC07V2_G008420 TC08V2_G002980 TC09V2_G010320 TC02V2_G012040 TC04V2_G000540 TC01V2_G000080 TC02V2_G003430 TC02V2_G003440 TC03V2_G022100 TC05V2_G000700 TC05V2_G001930 TC05V2_G014530 TC05V2_G021210 TC06V2_G001230 TC08V2_G003620 TC09V2_G020000 TC09V2_G029840 TC10V2_G000950 TC10V2_G003320 TC10V2_G004720 TC03V2_G004850 TC02V2_G011030 TC03V2_G0…
7.01252e-07	16	30	4.5845	GO:0009063 Amino acid catabolic process	TC02V2_G008650 TC02V2_G008660 TC03V2_G019250 TC03V2_G006780 TC09V2_G021560 TC02V2_G005950 TC02V2_G008640 TC02V2_G022440 TC02V2_G027910 TC03V2_G009830 TC05V2_G005360 TC07V2_G002830 TC07V2_G008370 TC09V2_G004690 TC09V2_G028910 TC03V2_G006250
7.38334e-07	21	49	3.68397	GO:0009060 Aerobic respiration	TC01V2_G000620 TC05V2_G005370 TC05V2_G017700 TC06V2_G006020 TC09V2_G004540 TC09V2_G012740 TC02V2_G002650 TC02V2_G003540 TC02V2_G005990 TC03V2_G007420 TC04V2_G001140 TC04V2_G002360 TC04V2_G005340 TC05V2_G015560 TC07V2_G002830 TC07V2_G008540 TC10V2_G003960 TC10V2_G003970 TC10V2_G014530 TC02V2_G014080 TC09V2_G021560
8.57461e-07	54	217	2.13908	GO:0071554 Cell wall organization or biogenesis	TC02V2_G017650 TC03V2_G025950 TC04V2_G008660 TC09V2_G012890 TC01V2_G000700 TC02V2_G003850 TC02V2_G012380 TC02V2_G028210 TC02V2_G029390 TC03V2_G007520 TC03V2_G007650 TC03V2_G008620 TC03V2_G008630 TC03V2_G008640 TC03V2_G008660 TC03V2_G013040 TC03V2_G016440 TC04V2_G004470 TC04V2_G007120 TC04V2_G007360 TC04V2_G007920 TC04V2_G008600 TC04V2_G008610 TC05V2_G003380 TC05V2_G006130 TC05V2_G017030 TC05V2_G0…
8.90223e-07	40	140	2.45598	GO:0098662 Inorganic cation transmembrane transport	TC03V2_G018020 TC05V2_G000890 TC05V2_G024930 TC07V2_G008420 TC09V2_G004540 TC09V2_G029630 TC02V2_G001960 TC02V2_G005940 TC02V2_G006300 TC02V2_G018570 TC03V2_G004720 TC03V2_G020420 TC04V2_G003860 TC04V2_G006050 TC05V2_G014790 TC05V2_G018250 TC05V2_G022260 TC05V2_G023620 TC05V2_G023630 TC05V2_G023660 TC05V2_G026770 TC05V2_G026920 TC06V2_G002600 TC06V2_G003070 TC07V2_G001350 TC08V2_G002980 TC08V2_G0…
9.00414e-07	52	206	2.16985	GO:0033993 Response to lipid	TC03V2_G018980 TC05V2_G000660 TC05V2_G012050 TC05V2_G018130 TC08V2_G004850 TC10V2_G000030 TC10V2_G001240 TC03V2_G006670 TC03V2_G016600 TC09V2_G020080 TC02V2_G003750 TC02V2_G004620 TC02V2_G007010 TC02V2_G016860 TC03V2_G007020 TC03V2_G011430 TC03V2_G016070 TC05V2_G002230 TC05V2_G012320 TC07V2_G009860 TC08V2_G000620 TC08V2_G003650 TC08V2_G003660 TC08V2_G005380 TC09V2_G006390 TC09V2_G020180 TC09V2_G0…
1.01879e-06	75	344	1.87411	GO:1901135 Carbohydrate derivative metabolic process	TC02V2_G017100 TC02V2_G018410 TC02V2_G027440 TC02V2_G028780 TC03V2_G009260 TC03V2_G019320 TC04V2_G002430 TC04V2_G007870 TC04V2_G008660 TC05V2_G002170 TC09V2_G008070 TC10V2_G000220 TC10V2_G005570 TC10V2_G009710 TC02V2_G028210 TC05V2_G016160 TC10V2_G001090 TC01V2_G000700 TC02V2_G000010 TC02V2_G003850 TC02V2_G005320 TC02V2_G006020 TC02V2_G007230 TC02V2_G012720 TC02V2_G013180 TC02V2_G016230 TC02V2_G0…
1.36427e-06	81	384	1.81321	GO:0044255 Cellular lipid metabolic process	TC02V2_G012420 TC02V2_G029530 TC05V2_G015040 TC06V2_G001500 TC06V2_G006570 TC10V2_G000510 TC10V2_G003520 TC10V2_G007970 TC02V2_G012680 TC08V2_G000770 TC08V2_G001490 TC09V2_G006890 TC10V2_G001090 TC01V2_G000160 TC02V2_G002160 TC02V2_G005320 TC02V2_G006850 TC02V2_G007360 TC02V2_G008160 TC02V2_G019000 TC02V2_G019010 TC02V2_G020260 TC02V2_G022000 TC02V2_G023820 TC02V2_G027160 TC03V2_G003170 TC03V2_G0…
1.61133e-06	21	51	3.5395	GO:0031667 Response to nutrient levels	TC05V2_G025680 TC02V2_G010720 TC02V2_G021840 TC03V2_G017710 TC04V2_G000840 TC04V2_G007310 TC05V2_G024520 TC08V2_G003510 TC09V2_G010910 TC09V2_G021960 TC02V2_G029730 TC05V2_G019300 TC07V2_G008130 TC10V2_G007600 TC02V2_G011030 TC03V2_G016600 TC04V2_G005100 TC05V2_G000840 TC05V2_G015990 TC09V2_G000520 TC10V2_G001530
2.26599e-06	38	134	2.43765	GO:0098655 Monoatomic cation transmembrane transport	TC03V2_G018020 TC05V2_G024930 TC07V2_G008420 TC09V2_G004540 TC09V2_G029630 TC02V2_G001960 TC02V2_G005940 TC02V2_G006300 TC02V2_G018570 TC02V2_G029240 TC03V2_G004720 TC03V2_G020420 TC04V2_G003860 TC04V2_G006050 TC05V2_G014790 TC05V2_G018250 TC05V2_G023620 TC05V2_G023630 TC05V2_G023660 TC05V2_G026770 TC05V2_G026920 TC06V2_G002600 TC06V2_G003070 TC07V2_G001350 TC08V2_G002980 TC08V2_G005380 TC09V2_G0…
2.69369e-06	41	151	2.334	GO:0034220 Monoatomic ion transmembrane transport	TC03V2_G018020 TC05V2_G024930 TC07V2_G008420 TC09V2_G004540 TC09V2_G029630 TC02V2_G001960 TC02V2_G005940 TC02V2_G006300 TC02V2_G018570 TC02V2_G029240 TC03V2_G004720 TC03V2_G020420 TC04V2_G003860 TC04V2_G006050 TC04V2_G006180 TC05V2_G014790 TC05V2_G018250 TC05V2_G023620 TC05V2_G023630 TC05V2_G023660 TC05V2_G026770 TC05V2_G026920 TC06V2_G002600 TC06V2_G003070 TC07V2_G001350 TC08V2_G001930 TC08V2_G0…
2.83087e-06	31	99	2.69166	GO:0018193 Peptidyl-amino acid modification	TC02V2_G003370 TC02V2_G005260 TC02V2_G007730 TC02V2_G009260 TC02V2_G012260 TC03V2_G005950 TC03V2_G019250 TC04V2_G004110 TC05V2_G009500 TC05V2_G013420 TC05V2_G022900 TC08V2_G004280 TC09V2_G009070 TC09V2_G012090 TC09V2_G019560 TC09V2_G020500 TC02V2_G013420 TC03V2_G019850 TC04V2_G000640 TC05V2_G014760 TC08V2_G001510 TC09V2_G000150 TC09V2_G005050 TC09V2_G010350 TC09V2_G011460 TC09V2_G018370 TC09V2_G0…
2.86055e-06	110	581	1.62746	GO:0006629 Lipid metabolic process	TC02V2_G002560 TC02V2_G012420 TC02V2_G029530 TC05V2_G001930 TC05V2_G015040 TC06V2_G001500 TC06V2_G006570 TC09V2_G002940 TC09V2_G010320 TC10V2_G000510 TC10V2_G003520 TC10V2_G007970 TC02V2_G012680 TC08V2_G000770 TC08V2_G001490 TC09V2_G006890 TC10V2_G001090 TC01V2_G000160 TC02V2_G001340 TC02V2_G001370 TC02V2_G002160 TC02V2_G002570 TC02V2_G002590 TC02V2_G002600 TC02V2_G005320 TC02V2_G006850 TC02V2_G0…
2.91421e-06	26	75	2.97992	GO:0009199 Ribonucleoside triphosphate metabolic process	TC02V2_G018410 TC03V2_G009260 TC03V2_G019320 TC09V2_G008070 TC10V2_G005570 TC02V2_G000010 TC02V2_G005320 TC02V2_G006020 TC02V2_G012720 TC02V2_G018570 TC03V2_G008360 TC03V2_G010100 TC03V2_G015720 TC03V2_G019660 TC03V2_G024960 TC05V2_G006780 TC05V2_G006940 TC05V2_G011810 TC05V2_G021260 TC08V2_G003620 TC09V2_G002080 TC09V2_G004520 TC09V2_G017090 TC09V2_G020000 TC09V2_G026960 TC10V2_G003400
3.01936e-06	36	125	2.47563	GO:0009266 Response to temperature stimulus	TC03V2_G008260 TC03V2_G023820 TC09V2_G025970 TC09V2_G025980 TC07V2_G004880 TC02V2_G025310 TC03V2_G007020 TC03V2_G016060 TC03V2_G017220 TC04V2_G007780 TC05V2_G011950 TC05V2_G018130 TC07V2_G004620 TC09V2_G001530 TC09V2_G006390 TC09V2_G011170 TC10V2_G001290 TC10V2_G005860 TC10V2_G009820 TC10V2_G011010 TC02V2_G026220 TC02V2_G027730 TC03V2_G009930 TC03V2_G016600 TC03V2_G024320 TC04V2_G004620 TC04V2_G0…
3.46334e-06	25	71	3.02674	GO:0009144 Purine nucleoside triphosphate metabolic process	TC02V2_G018410 TC03V2_G009260 TC03V2_G019320 TC09V2_G008070 TC10V2_G005570 TC02V2_G005320 TC02V2_G006020 TC02V2_G012720 TC02V2_G018570 TC03V2_G008360 TC03V2_G010100 TC03V2_G015720 TC03V2_G019660 TC03V2_G024960 TC05V2_G006780 TC05V2_G006940 TC05V2_G011810 TC05V2_G021260 TC08V2_G003620 TC09V2_G002080 TC09V2_G004520 TC09V2_G017090 TC09V2_G020000 TC09V2_G026960 TC10V2_G003400
3.46334e-06	25	71	3.02674	GO:0009205 Purine ribonucleoside triphosphate metabolic process	TC02V2_G018410 TC03V2_G009260 TC03V2_G019320 TC09V2_G008070 TC10V2_G005570 TC02V2_G005320 TC02V2_G006020 TC02V2_G012720 TC02V2_G018570 TC03V2_G008360 TC03V2_G010100 TC03V2_G015720 TC03V2_G019660 TC03V2_G024960 TC05V2_G006780 TC05V2_G006940 TC05V2_G011810 TC05V2_G021260 TC08V2_G003620 TC09V2_G002080 TC09V2_G004520 TC09V2_G017090 TC09V2_G020000 TC09V2_G026960 TC10V2_G003400
3.57606e-06	45	175	2.21038	GO:0098542 Defense response to other organism	TC01V2_G000700 TC02V2_G003850 TC05V2_G012050 TC02V2_G011910 TC03V2_G015440 TC02V2_G002160 TC02V2_G007010 TC02V2_G012560 TC03V2_G025410 TC05V2_G008850 TC05V2_G023440 TC06V2_G000400 TC06V2_G001770 TC06V2_G002080 TC06V2_G007130 TC08V2_G005380 TC09V2_G003980 TC09V2_G012550 TC09V2_G013760 TC09V2_G030040 TC02V2_G029070 TC04V2_G001370 TC04V2_G005100 TC05V2_G007130 TC09V2_G020380 TC05V2_G009180 TC09V2_G0…
3.61906e-06	36	126	2.45598	GO:0071555 Cell wall organization	TC02V2_G012380 TC03V2_G007520 TC03V2_G008620 TC03V2_G008630 TC03V2_G008640 TC03V2_G013040 TC03V2_G016440 TC03V2_G025950 TC04V2_G007120 TC04V2_G007360 TC04V2_G007920 TC04V2_G008600 TC04V2_G008610 TC04V2_G008660 TC05V2_G003380 TC05V2_G006130 TC05V2_G021510 TC08V2_G001820 TC08V2_G004140 TC09V2_G003980 TC09V2_G005970 TC09V2_G005990 TC09V2_G006000 TC09V2_G008610 TC09V2_G012890 TC09V2_G014370 TC09V2_G0…
3.66224e-06	17	37	3.94948	GO:0097237 Cellular response to toxic substance	TC01V2_G000540 TC02V2_G004790 TC02V2_G025720 TC03V2_G023220 TC04V2_G000210 TC04V2_G001130 TC05V2_G004670 TC05V2_G004950 TC05V2_G006930 TC05V2_G008760 TC05V2_G012580 TC05V2_G012880 TC05V2_G020780 TC07V2_G002640 TC08V2_G002760 TC10V2_G013550 TC10V2_G014220
3.66224e-06	17	37	3.94948	GO:1990748 Cellular detoxification	TC01V2_G000540 TC02V2_G004790 TC02V2_G025720 TC03V2_G023220 TC04V2_G000210 TC04V2_G001130 TC05V2_G004670 TC05V2_G004950 TC05V2_G006930 TC05V2_G008760 TC05V2_G012580 TC05V2_G012880 TC05V2_G020780 TC07V2_G002640 TC08V2_G002760 TC10V2_G013550 TC10V2_G014220
5.31078e-06	32	107	2.57075	GO:0008652 Amino acid biosynthetic process	TC03V2_G018370 TC05V2_G011950 TC05V2_G020100 TC06V2_G002870 TC09V2_G024320 TC09V2_G025450 TC02V2_G029070 TC01V2_G000590 TC02V2_G007260 TC02V2_G008720 TC02V2_G008910 TC02V2_G008950 TC02V2_G012230 TC03V2_G001100 TC03V2_G004620 TC03V2_G014090 TC03V2_G016250 TC03V2_G019880 TC04V2_G004560 TC05V2_G011590 TC05V2_G020400 TC05V2_G026850 TC06V2_G001410 TC07V2_G001500 TC07V2_G003960 TC09V2_G004480 TC09V2_G0…
6.46777e-06	26	78	2.86531	GO:0009617 Response to bacterium	TC05V2_G012050 TC02V2_G012230 TC02V2_G012560 TC03V2_G015620 TC03V2_G024080 TC03V2_G025410 TC05V2_G023440 TC06V2_G001770 TC06V2_G002080 TC08V2_G005380 TC09V2_G003980 TC09V2_G030040 TC02V2_G027390 TC02V2_G029070 TC04V2_G001370 TC09V2_G006000 TC09V2_G020380 TC09V2_G013440 TC02V2_G011910 TC02V2_G014400 TC04V2_G000020 TC05V2_G000700 TC05V2_G022190 TC05V2_G024130 TC09V2_G028320 TC10V2_G005740
6.46777e-06	21	55	3.28208	GO:0009664 Plant-type cell wall organization	TC02V2_G012380 TC03V2_G007520 TC03V2_G008620 TC03V2_G008630 TC03V2_G008640 TC04V2_G007120 TC04V2_G007920 TC04V2_G008600 TC04V2_G008610 TC05V2_G003380 TC05V2_G006130 TC05V2_G021510 TC08V2_G004140 TC09V2_G026910 TC09V2_G030510 TC10V2_G002010 TC10V2_G002960 TC10V2_G014140 TC04V2_G007160 TC10V2_G000390 TC10V2_G007140
6.88413e-06	30	98	2.63141	GO:1901607 Alpha-amino acid biosynthetic process	TC03V2_G018370 TC05V2_G011950 TC05V2_G020100 TC06V2_G002870 TC09V2_G024320 TC09V2_G025450 TC02V2_G029070 TC01V2_G000590 TC02V2_G007260 TC02V2_G008720 TC02V2_G008910 TC02V2_G008950 TC02V2_G012230 TC03V2_G001100 TC03V2_G004620 TC03V2_G014090 TC03V2_G016250 TC04V2_G004560 TC05V2_G011590 TC05V2_G020400 TC06V2_G001410 TC07V2_G001500 TC07V2_G003960 TC09V2_G004480 TC09V2_G007960 TC09V2_G021830 TC09V2_G0…
8.4749e-06	31	104	2.56225	GO:0019725 Cellular homeostasis	TC05V2_G006930 TC05V2_G008760 TC05V2_G024930 TC07V2_G008420 TC08V2_G002980 TC02V2_G012040 TC04V2_G000540 TC05V2_G012880 TC01V2_G000080 TC02V2_G003430 TC02V2_G003440 TC03V2_G001110 TC03V2_G013280 TC03V2_G022100 TC04V2_G001130 TC04V2_G003520 TC05V2_G000700 TC05V2_G014530 TC06V2_G001230 TC07V2_G008790 TC08V2_G003620 TC09V2_G020000 TC09V2_G029840 TC10V2_G000950 TC10V2_G003320 TC10V2_G004720 TC10V2_G0…
8.66685e-06	16	35	3.92957	GO:0098869 Cellular oxidant detoxification	TC01V2_G000540 TC02V2_G004790 TC02V2_G025720 TC03V2_G023220 TC04V2_G000210 TC04V2_G001130 TC05V2_G004670 TC05V2_G004950 TC05V2_G006930 TC05V2_G008760 TC05V2_G012880 TC05V2_G020780 TC07V2_G002640 TC08V2_G002760 TC10V2_G013550 TC10V2_G014220
1.05306e-05	22	61	3.10017	GO:0055082 Intracellular chemical homeostasis	TC05V2_G024930 TC07V2_G008420 TC08V2_G002980 TC02V2_G012040 TC04V2_G000540 TC01V2_G000080 TC02V2_G003430 TC02V2_G003440 TC03V2_G022100 TC05V2_G000700 TC05V2_G014530 TC06V2_G001230 TC08V2_G003620 TC09V2_G020000 TC09V2_G029840 TC10V2_G000950 TC10V2_G003320 TC10V2_G004720 TC03V2_G004850 TC02V2_G011030 TC03V2_G016600 TC05V2_G026920
1.18129e-05	23	66	2.99555	GO:0046034 Atp metabolic process	TC02V2_G018410 TC03V2_G009260 TC03V2_G019320 TC09V2_G008070 TC10V2_G005570 TC02V2_G005320 TC02V2_G006020 TC02V2_G012720 TC02V2_G018570 TC03V2_G008360 TC03V2_G015720 TC03V2_G019660 TC05V2_G006780 TC05V2_G006940 TC05V2_G011810 TC05V2_G021260 TC08V2_G003620 TC09V2_G002080 TC09V2_G004520 TC09V2_G017090 TC09V2_G020000 TC09V2_G026960 TC10V2_G003400
1.54565e-05	37	139	2.28813	GO:0045229 External encapsulating structure organization	TC02V2_G012380 TC03V2_G007520 TC03V2_G008620 TC03V2_G008630 TC03V2_G008640 TC03V2_G013040 TC03V2_G016440 TC03V2_G025950 TC04V2_G007120 TC04V2_G007360 TC04V2_G007920 TC04V2_G008600 TC04V2_G008610 TC04V2_G008660 TC05V2_G003380 TC05V2_G006130 TC05V2_G021510 TC08V2_G001820 TC08V2_G004140 TC09V2_G001960 TC09V2_G003980 TC09V2_G005970 TC09V2_G005990 TC09V2_G006000 TC09V2_G008610 TC09V2_G012890 TC09V2_G0…
1.65403e-05	19	49	3.33312	GO:0006839 Mitochondrial transport	TC02V2_G012930 TC03V2_G017970 TC01V2_G000210 TC02V2_G010830 TC02V2_G012250 TC02V2_G015460 TC03V2_G008760 TC03V2_G010300 TC03V2_G011380 TC03V2_G015950 TC04V2_G002660 TC04V2_G003870 TC05V2_G002020 TC05V2_G014210 TC07V2_G002460 TC09V2_G019100 TC09V2_G025780 TC09V2_G025930 TC02V2_G011480
1.69556e-05	21	58	3.11232	GO:0042742 Defense response to bacterium	TC05V2_G012050 TC02V2_G012560 TC03V2_G025410 TC05V2_G023440 TC06V2_G001770 TC06V2_G002080 TC08V2_G005380 TC09V2_G003980 TC09V2_G030040 TC02V2_G029070 TC04V2_G001370 TC09V2_G020380 TC09V2_G013440 TC02V2_G011910 TC02V2_G014400 TC02V2_G027390 TC04V2_G000020 TC05V2_G022190 TC05V2_G024130 TC09V2_G028320 TC10V2_G005740
1.78413e-05	26	82	2.72554	GO:0009141 Nucleoside triphosphate metabolic process	TC02V2_G018410 TC03V2_G009260 TC03V2_G019320 TC09V2_G008070 TC10V2_G005570 TC02V2_G000010 TC02V2_G005320 TC02V2_G006020 TC02V2_G012720 TC02V2_G018570 TC03V2_G008360 TC03V2_G010100 TC03V2_G015720 TC03V2_G019660 TC03V2_G024960 TC05V2_G006780 TC05V2_G006940 TC05V2_G011810 TC05V2_G021260 TC08V2_G003620 TC09V2_G002080 TC09V2_G004520 TC09V2_G017090 TC09V2_G020000 TC09V2_G026960 TC10V2_G003400
2.60354e-05	33	120	2.36388	GO:0006457 Protein folding	TC02V2_G005260 TC02V2_G007730 TC03V2_G023820 TC05V2_G022900 TC09V2_G006390 TC09V2_G025970 TC09V2_G025980 TC10V2_G009820 TC03V2_G010340 TC02V2_G000770 TC02V2_G015770 TC02V2_G024630 TC02V2_G027490 TC02V2_G027730 TC03V2_G003250 TC03V2_G004860 TC03V2_G011790 TC03V2_G015350 TC03V2_G021450 TC04V2_G007780 TC05V2_G015550 TC05V2_G026760 TC06V2_G007910 TC09V2_G001530 TC09V2_G005050 TC09V2_G012360 TC09V2_G0…
2.62284e-05	11	19	4.97659	GO:0006606 Protein import into nucleus	TC05V2_G000820 TC02V2_G004380 TC02V2_G025610 TC03V2_G016710 TC03V2_G016720 TC05V2_G004860 TC05V2_G020750 TC05V2_G026600 TC05V2_G027020 TC08V2_G004290 TC09V2_G017410
3.11164e-05	59	274	1.85095	GO:0016192 Vesicle-mediated transport	TC02V2_G002920 TC02V2_G009470 TC02V2_G021990 TC03V2_G006410 TC03V2_G015530 TC03V2_G019750 TC03V2_G021840 TC03V2_G025730 TC04V2_G000980 TC04V2_G007400 TC05V2_G003410 TC05V2_G021020 TC05V2_G021640 TC05V2_G026730 TC08V2_G002370 TC09V2_G002880 TC09V2_G009070 TC09V2_G023870 TC10V2_G003320 TC10V2_G006980 TC10V2_G009720 TC02V2_G006250 TC02V2_G015040 TC02V2_G029280 TC03V2_G006380 TC03V2_G006950 TC03V2_G0…
3.15078e-05	30	105	2.45598	GO:0019693 Ribose phosphate metabolic process	TC02V2_G018410 TC03V2_G009260 TC03V2_G019320 TC09V2_G008070 TC10V2_G005570 TC10V2_G009710 TC02V2_G000010 TC02V2_G005320 TC02V2_G006020 TC02V2_G012720 TC02V2_G018570 TC02V2_G020430 TC03V2_G008360 TC03V2_G010100 TC03V2_G015720 TC03V2_G019660 TC03V2_G024960 TC05V2_G001120 TC05V2_G006780 TC05V2_G006940 TC05V2_G011810 TC05V2_G021260 TC07V2_G006340 TC08V2_G003620 TC09V2_G002080 TC09V2_G004520 TC09V2_G0…
3.70468e-05	101	552	1.57281	GO:0007165 Signal transduction	TC02V2_G007010 TC02V2_G009440 TC02V2_G011150 TC02V2_G012260 TC02V2_G023720 TC03V2_G005950 TC03V2_G018980 TC05V2_G000660 TC05V2_G009500 TC05V2_G012050 TC05V2_G013420 TC08V2_G002650 TC08V2_G004850 TC09V2_G009070 TC09V2_G019560 TC09V2_G020500 TC09V2_G028220 TC10V2_G000030 TC10V2_G010520 TC09V2_G020080 TC02V2_G003750 TC02V2_G004620 TC02V2_G005000 TC02V2_G010690 TC02V2_G014390 TC02V2_G017440 TC02V2_G0…
3.95775e-05	43	179	2.06495	GO:0009314 Response to radiation	TC02V2_G017710 TC05V2_G001500 TC06V2_G006570 TC09V2_G014980 TC10V2_G005860 TC03V2_G021850 TC02V2_G004110 TC02V2_G012230 TC03V2_G009310 TC03V2_G016010 TC05V2_G009810 TC05V2_G020100 TC05V2_G027580 TC06V2_G003510 TC08V2_G003730 TC09V2_G012090 TC09V2_G017520 TC09V2_G025770 TC10V2_G002740 TC02V2_G021150 TC02V2_G026220 TC03V2_G011920 TC03V2_G012590 TC03V2_G019860 TC05V2_G014510 TC05V2_G020270 TC05V2_G0…
4.05883e-05	103	567	1.56152	GO:0007154 Cell communication	TC02V2_G007010 TC02V2_G009440 TC02V2_G011150 TC02V2_G012260 TC02V2_G023720 TC03V2_G005950 TC03V2_G018980 TC05V2_G000660 TC05V2_G009500 TC05V2_G012050 TC05V2_G013420 TC05V2_G024100 TC08V2_G002650 TC08V2_G004850 TC09V2_G009070 TC09V2_G019560 TC09V2_G020500 TC09V2_G028220 TC10V2_G000030 TC10V2_G010520 TC09V2_G020080 TC02V2_G003750 TC02V2_G004620 TC02V2_G005000 TC02V2_G010690 TC02V2_G014390 TC02V2_G0…
4.37255e-05	22	66	2.86531	GO:0140115 Export across plasma membrane	TC02V2_G022490 TC02V2_G022530 TC02V2_G022550 TC02V2_G027080 TC03V2_G003340 TC03V2_G003350 TC03V2_G003360 TC03V2_G020420 TC03V2_G021980 TC03V2_G022660 TC04V2_G006050 TC05V2_G019920 TC06V2_G003070 TC07V2_G007570 TC07V2_G007580 TC07V2_G007600 TC07V2_G007680 TC08V2_G002950 TC09V2_G000580 TC09V2_G008630 TC09V2_G015140 TC09V2_G016080
4.64994e-05	30	107	2.41008	GO:0140352 Export from cell	TC03V2_G021840 TC05V2_G021640 TC10V2_G009720 TC05V2_G009180 TC02V2_G022490 TC02V2_G022530 TC02V2_G022550 TC02V2_G027080 TC03V2_G003340 TC03V2_G003350 TC03V2_G003360 TC03V2_G010530 TC03V2_G018410 TC03V2_G020420 TC03V2_G021980 TC03V2_G022660 TC04V2_G006050 TC05V2_G019920 TC06V2_G003070 TC07V2_G007570 TC07V2_G007580 TC07V2_G007600 TC07V2_G007680 TC08V2_G002950 TC08V2_G003930 TC09V2_G000580 TC09V2_G0…
4.8976e-05	11	20	4.72776	GO:0034504 Protein localization to nucleus	TC05V2_G000820 TC02V2_G004380 TC02V2_G025610 TC03V2_G016710 TC03V2_G016720 TC05V2_G004860 TC05V2_G020750 TC05V2_G026600 TC05V2_G027020 TC08V2_G004290 TC09V2_G017410
5.04425e-05	66	323	1.75644	GO:0033554 Cellular response to stress	TC02V2_G004790 TC02V2_G009220 TC03V2_G001110 TC03V2_G008260 TC03V2_G012170 TC03V2_G023820 TC04V2_G001130 TC04V2_G004340 TC05V2_G004580 TC05V2_G004670 TC05V2_G006930 TC05V2_G020300 TC10V2_G010520 TC03V2_G021850 TC05V2_G025680 TC06V2_G002520 TC09V2_G014720 TC02V2_G000930 TC02V2_G007010 TC02V2_G016860 TC02V2_G021150 TC03V2_G008440 TC03V2_G012760 TC03V2_G014520 TC03V2_G016010 TC03V2_G020690 TC03V2_G0…
5.23545e-05	122	703	1.49176	GO:0048856 Anatomical structure development	TC02V2_G015050 TC03V2_G022000 TC04V2_G003520 TC05V2_G024100 TC07V2_G003870 TC09V2_G023800 TC05V2_G013990 TC09V2_G028790 TC10V2_G006120 TC02V2_G002160 TC02V2_G003860 TC02V2_G005000 TC02V2_G005320 TC02V2_G007010 TC02V2_G007730 TC02V2_G010130 TC02V2_G012230 TC02V2_G012380 TC02V2_G012560 TC02V2_G016860 TC02V2_G017320 TC02V2_G022210 TC02V2_G025310 TC03V2_G005950 TC03V2_G009260 TC03V2_G009310 TC03V2_G0…
5.68961e-05	101	558	1.5559	GO:0023052 Signaling	TC02V2_G007010 TC02V2_G009440 TC02V2_G011150 TC02V2_G012260 TC02V2_G023720 TC03V2_G005950 TC03V2_G018980 TC05V2_G000660 TC05V2_G009500 TC05V2_G012050 TC05V2_G013420 TC08V2_G002650 TC08V2_G004850 TC09V2_G009070 TC09V2_G019560 TC09V2_G020500 TC09V2_G028220 TC10V2_G000030 TC10V2_G010520 TC09V2_G020080 TC02V2_G003750 TC02V2_G004620 TC02V2_G005000 TC02V2_G010690 TC02V2_G014390 TC02V2_G017440 TC02V2_G0…
5.68961e-05	32	119	2.31151	GO:0044042 Glucan metabolic process	TC09V2_G012890 TC02V2_G006660 TC02V2_G012440 TC02V2_G015220 TC03V2_G009950 TC03V2_G025950 TC04V2_G004470 TC05V2_G009940 TC05V2_G012320 TC05V2_G015690 TC05V2_G017740 TC07V2_G001020 TC08V2_G002470 TC08V2_G003540 TC09V2_G014310 TC09V2_G014350 TC09V2_G014360 TC09V2_G014370 TC09V2_G014390 TC09V2_G014400 TC09V2_G014430 TC09V2_G014450 TC09V2_G018150 TC09V2_G018210 TC09V2_G021950 TC10V2_G000390 TC10V2_G0…
5.89313e-05	29	103	2.42021	GO:0009259 Ribonucleotide metabolic process	TC02V2_G018410 TC03V2_G009260 TC03V2_G019320 TC09V2_G008070 TC10V2_G005570 TC02V2_G000010 TC02V2_G005320 TC02V2_G006020 TC02V2_G012720 TC02V2_G018570 TC02V2_G020430 TC03V2_G008360 TC03V2_G010100 TC03V2_G015720 TC03V2_G019660 TC03V2_G024960 TC05V2_G001120 TC05V2_G006780 TC05V2_G006940 TC05V2_G011810 TC05V2_G021260 TC07V2_G006340 TC08V2_G003620 TC09V2_G002080 TC09V2_G004520 TC09V2_G017090 TC09V2_G0…
7.21758e-05	14	32	3.76072	GO:0009808 Lignin metabolic process	TC09V2_G030610 TC05V2_G002190 TC05V2_G002200 TC05V2_G003210 TC05V2_G003220 TC05V2_G003230 TC05V2_G003260 TC06V2_G003600 TC09V2_G026700 TC09V2_G027940 TC10V2_G000770 TC03V2_G017820 TC06V2_G008120 TC10V2_G003290
7.58569e-05	41	172	2.04903	GO:0009416 Response to light stimulus	TC02V2_G017710 TC05V2_G001500 TC06V2_G006570 TC09V2_G014980 TC10V2_G005860 TC03V2_G021850 TC02V2_G004110 TC02V2_G012230 TC03V2_G009310 TC03V2_G016010 TC05V2_G009810 TC05V2_G020100 TC05V2_G027580 TC06V2_G003510 TC08V2_G003730 TC09V2_G012090 TC09V2_G017520 TC09V2_G025770 TC10V2_G002740 TC02V2_G021150 TC02V2_G026220 TC03V2_G011920 TC03V2_G012590 TC05V2_G014510 TC05V2_G020270 TC05V2_G020780 TC06V2_G0…
7.70293e-05	47	208	1.94235	GO:0009653 Anatomical structure morphogenesis	TC02V2_G015050 TC07V2_G003870 TC05V2_G013990 TC02V2_G002160 TC02V2_G003860 TC02V2_G005000 TC02V2_G007010 TC02V2_G010130 TC02V2_G012380 TC02V2_G017320 TC02V2_G025310 TC03V2_G009260 TC03V2_G018410 TC04V2_G003860 TC05V2_G003430 TC05V2_G006130 TC05V2_G014760 TC06V2_G000400 TC07V2_G007470 TC08V2_G001820 TC08V2_G002950 TC08V2_G003730 TC09V2_G001960 TC09V2_G003980 TC09V2_G026910 TC09V2_G028220 TC10V2_G0…
7.71712e-05	19	54	3.0245	GO:0009072 Aromatic amino acid metabolic process	TC02V2_G008650 TC02V2_G008660 TC09V2_G024320 TC09V2_G025450 TC02V2_G029070 TC02V2_G008640 TC02V2_G011200 TC03V2_G001100 TC03V2_G019880 TC04V2_G007560 TC05V2_G005360 TC07V2_G003960 TC07V2_G008370 TC08V2_G002950 TC09V2_G021830 TC09V2_G028910 TC10V2_G001930 TC10V2_G005920 TC10V2_G014160
8.49304e-05	11	21	4.50263	GO:0051170 Import into nucleus	TC05V2_G000820 TC02V2_G004380 TC02V2_G025610 TC03V2_G016710 TC03V2_G016720 TC05V2_G004860 TC05V2_G020750 TC05V2_G026600 TC05V2_G027020 TC08V2_G004290 TC09V2_G017410
8.49304e-05	11	21	4.50263	GO:0170035 L-amino acid catabolic process	TC03V2_G019250 TC09V2_G021560 TC02V2_G005950 TC02V2_G022440 TC03V2_G009830 TC05V2_G005360 TC07V2_G002830 TC07V2_G008370 TC09V2_G004690 TC09V2_G028910 TC03V2_G006250
8.69636e-05	25	84	2.55831	GO:0042546 Cell wall biogenesis	TC02V2_G017650 TC03V2_G025950 TC04V2_G008660 TC09V2_G012890 TC02V2_G029390 TC03V2_G007650 TC03V2_G008620 TC03V2_G008630 TC03V2_G008640 TC04V2_G004470 TC04V2_G008600 TC04V2_G008610 TC08V2_G002950 TC09V2_G014310 TC09V2_G014350 TC09V2_G014360 TC09V2_G014370 TC09V2_G014390 TC09V2_G014400 TC09V2_G014430 TC09V2_G014450 TC09V2_G021950 TC10V2_G009720 TC04V2_G007160 TC10V2_G000390
9.00594e-05	23	74	2.67171	GO:1901136 Carbohydrate derivative catabolic process	TC02V2_G018410 TC03V2_G009260 TC03V2_G019320 TC01V2_G000700 TC02V2_G003850 TC02V2_G005320 TC02V2_G006020 TC02V2_G012720 TC03V2_G009830 TC03V2_G015720 TC05V2_G006780 TC05V2_G006940 TC05V2_G011810 TC05V2_G012630 TC05V2_G021260 TC06V2_G000370 TC08V2_G003620 TC09V2_G017090 TC09V2_G020000 TC09V2_G026960 TC10V2_G000220 TC10V2_G003400 TC10V2_G013770
9.52529e-05	462	3320	1.19618	GO:0009058 Biosynthetic process	TC01V2_G000330 TC02V2_G002560 TC02V2_G005260 TC02V2_G005950 TC02V2_G007730 TC02V2_G012420 TC02V2_G012560 TC02V2_G017320 TC02V2_G017650 TC02V2_G022230 TC02V2_G028780 TC02V2_G029140 TC03V2_G000670 TC03V2_G000780 TC03V2_G001460 TC03V2_G003520 TC03V2_G011650 TC03V2_G013370 TC03V2_G018370 TC03V2_G019250 TC03V2_G021460 TC03V2_G023820 TC03V2_G025400 TC04V2_G002480 TC04V2_G002990 TC04V2_G003520 TC04V2_G0…
9.63416e-05	27	95	2.44306	GO:0009150 Purine ribonucleotide metabolic process	TC02V2_G018410 TC03V2_G009260 TC03V2_G019320 TC09V2_G008070 TC10V2_G005570 TC02V2_G005320 TC02V2_G006020 TC02V2_G012720 TC02V2_G018570 TC02V2_G020430 TC03V2_G008360 TC03V2_G010100 TC03V2_G015720 TC03V2_G019660 TC03V2_G024960 TC05V2_G001120 TC05V2_G006780 TC05V2_G006940 TC05V2_G011810 TC05V2_G021260 TC08V2_G003620 TC09V2_G002080 TC09V2_G004520 TC09V2_G017090 TC09V2_G020000 TC09V2_G026960 TC10V2_G0…
9.75028e-05	12	25	4.12605	GO:0034599 Cellular response to oxidative stress	TC02V2_G004790 TC03V2_G001110 TC03V2_G012170 TC04V2_G001130 TC05V2_G004670 TC05V2_G006930 TC05V2_G012880 TC05V2_G020780 TC09V2_G002170 TC09V2_G028310 TC10V2_G014220 TC02V2_G029620
9.75028e-05	33	128	2.21614	GO:0097305 Response to alcohol	TC03V2_G018980 TC05V2_G000660 TC05V2_G018130 TC10V2_G001240 TC03V2_G006670 TC03V2_G016600 TC09V2_G020080 TC02V2_G016860 TC03V2_G007020 TC03V2_G011430 TC03V2_G016070 TC05V2_G012320 TC08V2_G000620 TC08V2_G003660 TC09V2_G006390 TC10V2_G000390 TC10V2_G002010 TC10V2_G003040 TC10V2_G011740 TC03V2_G009930 TC03V2_G021120 TC03V2_G024320 TC05V2_G009180 TC03V2_G002170 TC04V2_G001370 TC05V2_G024130 TC07V2_G0…
9.75028e-05	102	573	1.53017	GO:0006996 Organelle organization	TC02V2_G002920 TC02V2_G009440 TC02V2_G009700 TC02V2_G015880 TC02V2_G023720 TC03V2_G003520 TC03V2_G003980 TC03V2_G014710 TC03V2_G014720 TC03V2_G017970 TC03V2_G019750 TC03V2_G021440 TC03V2_G021460 TC03V2_G023140 TC03V2_G023270 TC03V2_G025730 TC04V2_G000590 TC04V2_G001450 TC04V2_G002470 TC04V2_G004340 TC04V2_G007400 TC05V2_G004580 TC05V2_G014140 TC05V2_G021640 TC05V2_G026070 TC05V2_G026480 TC05V2_G0…
9.75028e-05	19	55	2.9695	GO:0009698 Phenylpropanoid metabolic process	TC09V2_G030610 TC05V2_G017720 TC02V2_G006710 TC05V2_G002190 TC05V2_G002200 TC05V2_G003210 TC05V2_G003220 TC05V2_G003230 TC05V2_G003260 TC05V2_G005360 TC06V2_G003600 TC09V2_G017970 TC09V2_G026700 TC09V2_G027940 TC10V2_G000770 TC03V2_G017820 TC03V2_G006670 TC06V2_G008120 TC10V2_G003290
9.75028e-05	33	128	2.21614	GO:0009737 Response to abscisic acid	TC03V2_G018980 TC05V2_G000660 TC05V2_G018130 TC10V2_G001240 TC03V2_G006670 TC03V2_G016600 TC09V2_G020080 TC02V2_G016860 TC03V2_G007020 TC03V2_G011430 TC03V2_G016070 TC05V2_G012320 TC08V2_G000620 TC08V2_G003660 TC09V2_G006390 TC10V2_G000390 TC10V2_G002010 TC10V2_G003040 TC10V2_G011740 TC03V2_G009930 TC03V2_G021120 TC03V2_G024320 TC05V2_G009180 TC03V2_G002170 TC04V2_G001370 TC05V2_G024130 TC07V2_G0…
0.000108596	21	65	2.77715	GO:0006605 Protein targeting	TC02V2_G009470 TC02V2_G012930 TC03V2_G010680 TC03V2_G017970 TC04V2_G003190 TC06V2_G002420 TC05V2_G005030 TC05V2_G009180 TC05V2_G017880 TC02V2_G023670 TC02V2_G029280 TC03V2_G011510 TC05V2_G007860 TC05V2_G014210 TC09V2_G002560 TC09V2_G024690 TC09V2_G025930 TC09V2_G028730 TC07V2_G000030 TC02V2_G011480 TC03V2_G006950
0.000109556	22	70	2.70158	GO:0050801 Monoatomic ion homeostasis	TC03V2_G000990 TC05V2_G013660 TC05V2_G024930 TC06V2_G006110 TC07V2_G008420 TC08V2_G002980 TC02V2_G012040 TC04V2_G000540 TC01V2_G000080 TC02V2_G003430 TC02V2_G003440 TC03V2_G022100 TC05V2_G000700 TC05V2_G014530 TC05V2_G021210 TC06V2_G001230 TC09V2_G029840 TC10V2_G000950 TC10V2_G003320 TC10V2_G004720 TC05V2_G026920 TC09V2_G028810
0.00013826	23	76	2.6014	GO:0009620 Response to fungus	TC01V2_G000700 TC02V2_G003850 TC02V2_G002160 TC02V2_G007010 TC02V2_G012230 TC05V2_G023440 TC06V2_G001770 TC06V2_G002080 TC06V2_G007130 TC08V2_G005380 TC09V2_G003980 TC02V2_G022320 TC04V2_G005100 TC05V2_G007130 TC08V2_G001490 TC10V2_G000640 TC05V2_G009180 TC09V2_G013440 TC03V2_G016670 TC05V2_G024130 TC07V2_G009360 TC09V2_G023200 TC09V2_G028320
0.000169048	16	43	3.19849	GO:0030003 Intracellular monoatomic cation homeostasis	TC05V2_G024930 TC07V2_G008420 TC08V2_G002980 TC02V2_G012040 TC04V2_G000540 TC01V2_G000080 TC02V2_G003430 TC02V2_G003440 TC05V2_G000700 TC05V2_G014530 TC06V2_G001230 TC09V2_G029840 TC10V2_G000950 TC10V2_G003320 TC10V2_G004720 TC05V2_G026920
0.000176479	65	330	1.69314	GO:0009057 Macromolecule catabolic process	TC02V2_G004620 TC02V2_G004720 TC02V2_G004810 TC02V2_G009470 TC02V2_G015700 TC02V2_G022140 TC03V2_G000780 TC03V2_G010070 TC03V2_G017080 TC03V2_G020050 TC03V2_G022360 TC03V2_G026090 TC04V2_G003810 TC04V2_G007360 TC05V2_G001750 TC05V2_G008050 TC05V2_G014960 TC05V2_G020300 TC05V2_G026020 TC07V2_G004500 TC07V2_G004520 TC08V2_G000140 TC09V2_G006530 TC09V2_G006590 TC09V2_G018740 TC09V2_G022040 TC10V2_G0…
0.000192265	10	19	4.52418	GO:0016036 Cellular response to phosphate starvation	TC04V2_G007310 TC05V2_G024520 TC09V2_G010910 TC09V2_G021960 TC02V2_G029730 TC05V2_G019300 TC07V2_G008130 TC10V2_G007600 TC05V2_G000840 TC05V2_G015990
0.000192265	25	88	2.44203	GO:0170034 L-amino acid biosynthetic process	TC03V2_G018370 TC05V2_G011950 TC05V2_G020100 TC06V2_G002870 TC09V2_G024320 TC01V2_G000590 TC02V2_G007260 TC02V2_G008720 TC02V2_G008910 TC02V2_G008950 TC02V2_G012230 TC03V2_G004620 TC03V2_G014090 TC03V2_G016250 TC04V2_G004560 TC05V2_G011590 TC05V2_G020400 TC06V2_G001410 TC07V2_G001500 TC09V2_G004480 TC09V2_G007960 TC09V2_G021830 TC09V2_G022120 TC10V2_G002870 TC10V2_G014160
0.000192265	25	88	2.44203	GO:0170038 Proteinogenic amino acid biosynthetic process	TC03V2_G018370 TC05V2_G011950 TC05V2_G020100 TC06V2_G002870 TC09V2_G024320 TC01V2_G000590 TC02V2_G007260 TC02V2_G008720 TC02V2_G008910 TC02V2_G008950 TC02V2_G012230 TC03V2_G004620 TC03V2_G014090 TC03V2_G016250 TC04V2_G004560 TC05V2_G011590 TC05V2_G020400 TC06V2_G001410 TC07V2_G001500 TC09V2_G004480 TC09V2_G007960 TC09V2_G021830 TC09V2_G022120 TC10V2_G002870 TC10V2_G014160
0.000192265	17	48	3.04439	GO:0006873 Intracellular monoatomic ion homeostasis	TC05V2_G024930 TC07V2_G008420 TC08V2_G002980 TC02V2_G012040 TC04V2_G000540 TC01V2_G000080 TC02V2_G003430 TC02V2_G003440 TC03V2_G022100 TC05V2_G000700 TC05V2_G014530 TC06V2_G001230 TC09V2_G029840 TC10V2_G000950 TC10V2_G003320 TC10V2_G004720 TC05V2_G026920
0.000273006	126	759	1.42699	GO:0032502 Developmental process	TC02V2_G015050 TC03V2_G022000 TC03V2_G024660 TC04V2_G003520 TC05V2_G024100 TC07V2_G003870 TC09V2_G005490 TC09V2_G023800 TC05V2_G013990 TC09V2_G028790 TC10V2_G006120 TC02V2_G002160 TC02V2_G003860 TC02V2_G005000 TC02V2_G005320 TC02V2_G007010 TC02V2_G007730 TC02V2_G010130 TC02V2_G012230 TC02V2_G012380 TC02V2_G012560 TC02V2_G016860 TC02V2_G017320 TC02V2_G022210 TC02V2_G025310 TC03V2_G005950 TC03V2_G0…
0.000338076	10	20	4.29797	GO:0170040 Proteinogenic amino acid catabolic process	TC03V2_G019250 TC09V2_G021560 TC02V2_G005950 TC02V2_G022440 TC05V2_G005360 TC07V2_G002830 TC07V2_G008370 TC09V2_G004690 TC09V2_G028910 TC03V2_G006250
0.000338076	10	20	4.29797	GO:0170041 Non-proteinogenic amino acid metabolic process	TC02V2_G008650 TC02V2_G008660 TC02V2_G009260 TC03V2_G018370 TC08V2_G004280 TC03V2_G006780 TC02V2_G008640 TC02V2_G027910 TC03V2_G009830 TC06V2_G000400
0.000341796	17	50	2.92262	GO:0006913 Nucleocytoplasmic transport	TC02V2_G017430 TC05V2_G000820 TC02V2_G004380 TC02V2_G025610 TC03V2_G016710 TC03V2_G016720 TC05V2_G004860 TC05V2_G020750 TC05V2_G026600 TC05V2_G027020 TC06V2_G003100 TC08V2_G004290 TC09V2_G007800 TC09V2_G017410 TC09V2_G020080 TC10V2_G001680 TC09V2_G003940
0.000345326	13	32	3.4921	GO:1990542 Mitochondrial transmembrane transport	TC02V2_G012930 TC01V2_G000210 TC02V2_G012250 TC02V2_G015460 TC03V2_G008760 TC03V2_G010300 TC03V2_G011380 TC03V2_G015950 TC04V2_G002660 TC04V2_G003870 TC07V2_G002460 TC09V2_G019100 TC02V2_G011480
0.000366436	11	24	3.9398	GO:0006099 Tricarboxylic acid cycle	TC01V2_G000620 TC05V2_G005370 TC02V2_G002650 TC02V2_G003540 TC03V2_G007420 TC04V2_G001140 TC04V2_G002360 TC07V2_G002830 TC07V2_G008540 TC10V2_G003960 TC10V2_G003970
0.000366436	15	41	3.14485	GO:0090150 Establishment of protein localization to membrane	TC03V2_G010680 TC03V2_G017970 TC04V2_G003190 TC06V2_G002420 TC02V2_G014400 TC05V2_G005030 TC05V2_G009180 TC02V2_G004110 TC02V2_G023670 TC03V2_G011510 TC05V2_G007860 TC05V2_G014210 TC09V2_G002560 TC09V2_G025930 TC10V2_G005500
0.000366436	11	24	3.9398	GO:0006739 Nadp metabolic process	TC02V2_G017100 TC02V2_G027440 TC04V2_G001140 TC04V2_G002430 TC02V2_G016230 TC02V2_G024220 TC03V2_G007660 TC03V2_G017050 TC03V2_G024320 TC05V2_G023800 TC04V2_G000020
0.00038571	16	46	2.98989	GO:0019364 Pyridine nucleotide catabolic process	TC02V2_G018410 TC03V2_G009260 TC03V2_G019320 TC02V2_G005320 TC02V2_G006020 TC02V2_G012720 TC03V2_G015720 TC05V2_G006780 TC05V2_G006940 TC05V2_G011810 TC05V2_G021260 TC08V2_G003620 TC09V2_G017090 TC09V2_G020000 TC09V2_G026960 TC10V2_G003400
0.00038571	37	161	1.97546	GO:0030001 Metal ion transport	TC03V2_G018020 TC05V2_G024930 TC07V2_G008420 TC09V2_G020330 TC09V2_G029630 TC02V2_G001960 TC02V2_G007240 TC03V2_G000600 TC03V2_G004720 TC04V2_G000540 TC05V2_G000700 TC05V2_G001440 TC05V2_G014530 TC05V2_G014790 TC05V2_G021210 TC05V2_G023620 TC05V2_G023630 TC05V2_G023660 TC05V2_G026920 TC06V2_G001700 TC06V2_G003280 TC07V2_G000330 TC07V2_G001350 TC07V2_G007230 TC08V2_G005380 TC09V2_G000820 TC09V2_G0…
0.00038571	16	46	2.98989	GO:0006096 Glycolytic process	TC02V2_G018410 TC03V2_G009260 TC03V2_G019320 TC02V2_G005320 TC02V2_G006020 TC02V2_G012720 TC03V2_G015720 TC05V2_G006780 TC05V2_G006940 TC05V2_G011810 TC05V2_G021260 TC08V2_G003620 TC09V2_G017090 TC09V2_G020000 TC09V2_G026960 TC10V2_G003400
0.00038571	16	46	2.98989	GO:0046031 Adp metabolic process	TC02V2_G018410 TC03V2_G009260 TC03V2_G019320 TC02V2_G005320 TC02V2_G006020 TC02V2_G012720 TC03V2_G015720 TC05V2_G006780 TC05V2_G006940 TC05V2_G011810 TC05V2_G021260 TC08V2_G003620 TC09V2_G017090 TC09V2_G020000 TC09V2_G026960 TC10V2_G003400
0.00038571	16	46	2.98989	GO:0046032 Adp catabolic process	TC02V2_G018410 TC03V2_G009260 TC03V2_G019320 TC02V2_G005320 TC02V2_G006020 TC02V2_G012720 TC03V2_G015720 TC05V2_G006780 TC05V2_G006940 TC05V2_G011810 TC05V2_G021260 TC08V2_G003620 TC09V2_G017090 TC09V2_G020000 TC09V2_G026960 TC10V2_G003400
0.00038571	16	46	2.98989	GO:0006195 Purine nucleotide catabolic process	TC02V2_G018410 TC03V2_G009260 TC03V2_G019320 TC02V2_G005320 TC02V2_G006020 TC02V2_G012720 TC03V2_G015720 TC05V2_G006780 TC05V2_G006940 TC05V2_G011810 TC05V2_G021260 TC08V2_G003620 TC09V2_G017090 TC09V2_G020000 TC09V2_G026960 TC10V2_G003400
0.00038571	16	46	2.98989	GO:0072526 Pyridine-containing compound catabolic process	TC02V2_G018410 TC03V2_G009260 TC03V2_G019320 TC02V2_G005320 TC02V2_G006020 TC02V2_G012720 TC03V2_G015720 TC05V2_G006780 TC05V2_G006940 TC05V2_G011810 TC05V2_G021260 TC08V2_G003620 TC09V2_G017090 TC09V2_G020000 TC09V2_G026960 TC10V2_G003400
0.00038571	16	46	2.98989	GO:0009134 Nucleoside diphosphate catabolic process	TC02V2_G018410 TC03V2_G009260 TC03V2_G019320 TC02V2_G005320 TC02V2_G006020 TC02V2_G012720 TC03V2_G015720 TC05V2_G006780 TC05V2_G006940 TC05V2_G011810 TC05V2_G021260 TC08V2_G003620 TC09V2_G017090 TC09V2_G020000 TC09V2_G026960 TC10V2_G003400
0.00038571	16	46	2.98989	GO:0009137 Purine nucleoside diphosphate catabolic process	TC02V2_G018410 TC03V2_G009260 TC03V2_G019320 TC02V2_G005320 TC02V2_G006020 TC02V2_G012720 TC03V2_G015720 TC05V2_G006780 TC05V2_G006940 TC05V2_G011810 TC05V2_G021260 TC08V2_G003620 TC09V2_G017090 TC09V2_G020000 TC09V2_G026960 TC10V2_G003400
0.00038571	16	46	2.98989	GO:0009154 Purine ribonucleotide catabolic process	TC02V2_G018410 TC03V2_G009260 TC03V2_G019320 TC02V2_G005320 TC02V2_G006020 TC02V2_G012720 TC03V2_G015720 TC05V2_G006780 TC05V2_G006940 TC05V2_G011810 TC05V2_G021260 TC08V2_G003620 TC09V2_G017090 TC09V2_G020000 TC09V2_G026960 TC10V2_G003400
0.00038571	16	46	2.98989	GO:0009181 Purine ribonucleoside diphosphate catabolic process	TC02V2_G018410 TC03V2_G009260 TC03V2_G019320 TC02V2_G005320 TC02V2_G006020 TC02V2_G012720 TC03V2_G015720 TC05V2_G006780 TC05V2_G006940 TC05V2_G011810 TC05V2_G021260 TC08V2_G003620 TC09V2_G017090 TC09V2_G020000 TC09V2_G026960 TC10V2_G003400
0.00038571	16	46	2.98989	GO:0009191 Ribonucleoside diphosphate catabolic process	TC02V2_G018410 TC03V2_G009260 TC03V2_G019320 TC02V2_G005320 TC02V2_G006020 TC02V2_G012720 TC03V2_G015720 TC05V2_G006780 TC05V2_G006940 TC05V2_G011810 TC05V2_G021260 TC08V2_G003620 TC09V2_G017090 TC09V2_G020000 TC09V2_G026960 TC10V2_G003400
0.00038571	16	46	2.98989	GO:0009261 Ribonucleotide catabolic process	TC02V2_G018410 TC03V2_G009260 TC03V2_G019320 TC02V2_G005320 TC02V2_G006020 TC02V2_G012720 TC03V2_G015720 TC05V2_G006780 TC05V2_G006940 TC05V2_G011810 TC05V2_G021260 TC08V2_G003620 TC09V2_G017090 TC09V2_G020000 TC09V2_G026960 TC10V2_G003400
0.000400859	14	37	3.25252	GO:0031669 Cellular response to nutrient levels	TC05V2_G025680 TC03V2_G017710 TC04V2_G007310 TC05V2_G024520 TC08V2_G003510 TC09V2_G010910 TC09V2_G021960 TC02V2_G029730 TC05V2_G019300 TC07V2_G008130 TC10V2_G007600 TC05V2_G000840 TC05V2_G015990 TC09V2_G000520
0.000404105	31	126	2.11487	GO:0006631 Fatty acid metabolic process	TC10V2_G003520 TC08V2_G001490 TC09V2_G006890 TC02V2_G002160 TC02V2_G006850 TC02V2_G020260 TC02V2_G023820 TC03V2_G020600 TC03V2_G021300 TC03V2_G024850 TC03V2_G025230 TC04V2_G004410 TC05V2_G014380 TC05V2_G015560 TC05V2_G025150 TC05V2_G025290 TC07V2_G007690 TC08V2_G002200 TC09V2_G003980 TC09V2_G006360 TC09V2_G010210 TC09V2_G012690 TC09V2_G018310 TC09V2_G027760 TC10V2_G004640 TC10V2_G004940 TC10V2_G0…
0.000425893	9	17	4.55079	GO:0006098 Pentose-phosphate shunt	TC02V2_G017100 TC02V2_G027440 TC04V2_G002430 TC02V2_G016230 TC02V2_G024220 TC03V2_G007660 TC03V2_G017050 TC03V2_G024320 TC05V2_G023800
0.000425893	9	17	4.55079	GO:0006740 Nadph regeneration	TC02V2_G017100 TC02V2_G027440 TC04V2_G002430 TC02V2_G016230 TC02V2_G024220 TC03V2_G007660 TC03V2_G017050 TC03V2_G024320 TC05V2_G023800
0.000478721	40	181	1.89965	GO:0005976 Polysaccharide metabolic process	TC02V2_G017650 TC04V2_G007360 TC09V2_G012890 TC02V2_G003850 TC02V2_G006660 TC02V2_G012440 TC02V2_G013840 TC02V2_G015220 TC02V2_G023260 TC03V2_G009950 TC03V2_G019720 TC03V2_G025950 TC04V2_G002060 TC04V2_G004470 TC05V2_G009940 TC05V2_G012320 TC05V2_G015690 TC05V2_G017400 TC05V2_G017740 TC07V2_G001020 TC08V2_G002470 TC08V2_G003540 TC09V2_G014310 TC09V2_G014350 TC09V2_G014360 TC09V2_G014370 TC09V2_G0…
0.000529511	17	52	2.81021	GO:0051169 Nuclear transport	TC02V2_G017430 TC05V2_G000820 TC02V2_G004380 TC02V2_G025610 TC03V2_G016710 TC03V2_G016720 TC05V2_G004860 TC05V2_G020750 TC05V2_G026600 TC05V2_G027020 TC06V2_G003100 TC08V2_G004290 TC09V2_G007800 TC09V2_G017410 TC09V2_G020080 TC10V2_G001680 TC09V2_G003940
0.000529511	17	52	2.81021	GO:0072523 Purine-containing compound catabolic process	TC02V2_G018410 TC03V2_G009260 TC03V2_G019320 TC02V2_G005320 TC02V2_G006020 TC02V2_G012720 TC03V2_G009830 TC03V2_G015720 TC05V2_G006780 TC05V2_G006940 TC05V2_G011810 TC05V2_G021260 TC08V2_G003620 TC09V2_G017090 TC09V2_G020000 TC09V2_G026960 TC10V2_G003400
0.000530828	19	62	2.63424	GO:0046434 Organophosphate catabolic process	TC02V2_G018410 TC03V2_G009260 TC03V2_G019320 TC02V2_G005320 TC02V2_G006020 TC02V2_G012720 TC03V2_G015720 TC05V2_G006780 TC05V2_G006940 TC05V2_G011810 TC05V2_G012630 TC05V2_G021260 TC08V2_G003620 TC09V2_G017090 TC09V2_G020000 TC09V2_G026960 TC10V2_G000220 TC10V2_G003400 TC10V2_G013770
0.000530828	19	62	2.63424	GO:0055080 Monoatomic cation homeostasis	TC05V2_G013660 TC05V2_G024930 TC07V2_G008420 TC08V2_G002980 TC02V2_G012040 TC04V2_G000540 TC01V2_G000080 TC02V2_G003430 TC02V2_G003440 TC05V2_G000700 TC05V2_G014530 TC05V2_G021210 TC06V2_G001230 TC09V2_G029840 TC10V2_G000950 TC10V2_G003320 TC10V2_G004720 TC05V2_G026920 TC09V2_G028810
0.000531531	18	57	2.71451	GO:0006090 Pyruvate metabolic process	TC02V2_G018410 TC03V2_G009260 TC03V2_G019320 TC02V2_G005320 TC02V2_G006020 TC02V2_G012720 TC02V2_G020820 TC03V2_G015720 TC05V2_G006780 TC05V2_G006940 TC05V2_G011810 TC05V2_G021260 TC08V2_G003620 TC09V2_G017090 TC09V2_G020000 TC09V2_G026960 TC10V2_G003400 TC10V2_G007790
0.00053767	14	38	3.16692	GO:0042594 Response to starvation	TC05V2_G025680 TC04V2_G007310 TC05V2_G024520 TC08V2_G003510 TC09V2_G010910 TC09V2_G021960 TC02V2_G029730 TC05V2_G019300 TC07V2_G008130 TC10V2_G007600 TC04V2_G005100 TC05V2_G000840 TC05V2_G015990 TC09V2_G000520
0.000547875	62	324	1.6449	GO:0008610 Lipid biosynthetic process	TC02V2_G002560 TC02V2_G012420 TC05V2_G001930 TC06V2_G001500 TC06V2_G006570 TC10V2_G000510 TC10V2_G003520 TC02V2_G012680 TC08V2_G001490 TC09V2_G006890 TC10V2_G001090 TC01V2_G000160 TC02V2_G001340 TC02V2_G001370 TC02V2_G002570 TC02V2_G002590 TC02V2_G002600 TC02V2_G006850 TC02V2_G008160 TC02V2_G020260 TC02V2_G022000 TC02V2_G023820 TC02V2_G027160 TC03V2_G021300 TC03V2_G021880 TC03V2_G023890 TC03V2_G0…
0.000565105	42	195	1.85143	GO:0051604 Protein maturation	TC02V2_G005260 TC02V2_G007730 TC03V2_G019250 TC03V2_G023820 TC04V2_G004110 TC05V2_G022900 TC09V2_G006390 TC09V2_G013510 TC09V2_G025970 TC09V2_G025980 TC10V2_G009820 TC03V2_G010340 TC02V2_G000770 TC02V2_G015770 TC02V2_G024630 TC02V2_G027490 TC02V2_G027730 TC03V2_G003250 TC03V2_G004860 TC03V2_G009110 TC03V2_G011790 TC03V2_G015350 TC03V2_G021450 TC04V2_G007780 TC05V2_G015550 TC05V2_G026760 TC06V2_G0…
0.000581355	6	8	6.44695	GO:0009074 Aromatic amino acid family catabolic process	TC02V2_G008650 TC02V2_G008660 TC02V2_G008640 TC05V2_G005360 TC07V2_G008370 TC09V2_G028910
0.000621104	13	34	3.28668	GO:0009267 Cellular response to starvation	TC05V2_G025680 TC04V2_G007310 TC05V2_G024520 TC08V2_G003510 TC09V2_G010910 TC09V2_G021960 TC02V2_G029730 TC05V2_G019300 TC07V2_G008130 TC10V2_G007600 TC05V2_G000840 TC05V2_G015990 TC09V2_G000520
0.000632131	7	11	5.47014	GO:0006801 Superoxide metabolic process	TC03V2_G011920 TC05V2_G012880 TC05V2_G020100 TC05V2_G020780 TC05V2_G021080 TC09V2_G024940 TC10V2_G014220
0.000632131	16	48	2.86531	GO:0009135 Purine nucleoside diphosphate metabolic process	TC02V2_G018410 TC03V2_G009260 TC03V2_G019320 TC02V2_G005320 TC02V2_G006020 TC02V2_G012720 TC03V2_G015720 TC05V2_G006780 TC05V2_G006940 TC05V2_G011810 TC05V2_G021260 TC08V2_G003620 TC09V2_G017090 TC09V2_G020000 TC09V2_G026960 TC10V2_G003400
0.000632131	16	48	2.86531	GO:0009179 Purine ribonucleoside diphosphate metabolic process	TC02V2_G018410 TC03V2_G009260 TC03V2_G019320 TC02V2_G005320 TC02V2_G006020 TC02V2_G012720 TC03V2_G015720 TC05V2_G006780 TC05V2_G006940 TC05V2_G011810 TC05V2_G021260 TC08V2_G003620 TC09V2_G017090 TC09V2_G020000 TC09V2_G026960 TC10V2_G003400
0.000632131	16	48	2.86531	GO:0009185 Ribonucleoside diphosphate metabolic process	TC02V2_G018410 TC03V2_G009260 TC03V2_G019320 TC02V2_G005320 TC02V2_G006020 TC02V2_G012720 TC03V2_G015720 TC05V2_G006780 TC05V2_G006940 TC05V2_G011810 TC05V2_G021260 TC08V2_G003620 TC09V2_G017090 TC09V2_G020000 TC09V2_G026960 TC10V2_G003400
0.000669326	39	178	1.88338	GO:1901701 Cellular response to oxygen-containing compound	TC03V2_G018980 TC05V2_G000660 TC05V2_G012050 TC08V2_G004850 TC09V2_G029190 TC10V2_G000030 TC09V2_G020080 TC02V2_G003750 TC02V2_G004620 TC02V2_G007010 TC02V2_G016860 TC03V2_G016070 TC05V2_G002230 TC05V2_G012580 TC05V2_G012880 TC05V2_G020780 TC06V2_G000400 TC07V2_G009860 TC08V2_G003650 TC08V2_G003660 TC08V2_G005380 TC09V2_G006390 TC09V2_G025940 TC10V2_G003040 TC10V2_G011740 TC10V2_G014220 TC04V2_G0…
0.000699792	9	18	4.29797	GO:0006586 Indolalkylamine metabolic process	TC02V2_G008650 TC02V2_G008660 TC09V2_G025450 TC02V2_G029070 TC02V2_G008640 TC03V2_G001100 TC07V2_G003960 TC08V2_G002950 TC10V2_G001930
0.00076718	20	69	2.49158	GO:0019748 Secondary metabolic process	TC09V2_G030610 TC05V2_G017720 TC02V2_G006710 TC02V2_G020520 TC05V2_G002190 TC05V2_G002200 TC05V2_G003210 TC05V2_G003220 TC05V2_G003230 TC05V2_G003260 TC05V2_G005360 TC06V2_G003600 TC09V2_G017970 TC09V2_G026700 TC09V2_G027940 TC10V2_G000770 TC03V2_G017820 TC03V2_G006670 TC06V2_G008120 TC10V2_G003290
0.000801194	19	64	2.55192	GO:0009408 Response to heat	TC03V2_G008260 TC03V2_G023820 TC09V2_G025970 TC09V2_G025980 TC03V2_G016060 TC03V2_G017220 TC04V2_G007780 TC05V2_G011950 TC09V2_G001530 TC10V2_G009820 TC02V2_G026220 TC02V2_G027730 TC03V2_G009930 TC04V2_G004620 TC07V2_G009920 TC09V2_G020380 TC03V2_G016670 TC05V2_G024090 TC06V2_G000370
0.000809789	16	49	2.80684	GO:0072657 Protein localization to membrane	TC03V2_G010680 TC03V2_G017970 TC04V2_G003190 TC05V2_G012620 TC06V2_G002420 TC02V2_G014400 TC05V2_G005030 TC05V2_G009180 TC02V2_G004110 TC02V2_G023670 TC03V2_G011510 TC05V2_G007860 TC05V2_G014210 TC09V2_G002560 TC09V2_G025930 TC10V2_G005500
0.000809789	16	49	2.80684	GO:0009132 Nucleoside diphosphate metabolic process	TC02V2_G018410 TC03V2_G009260 TC03V2_G019320 TC02V2_G005320 TC02V2_G006020 TC02V2_G012720 TC03V2_G015720 TC05V2_G006780 TC05V2_G006940 TC05V2_G011810 TC05V2_G021260 TC08V2_G003620 TC09V2_G017090 TC09V2_G020000 TC09V2_G026960 TC10V2_G003400
0.000809789	16	49	2.80684	GO:0009166 Nucleotide catabolic process	TC02V2_G018410 TC03V2_G009260 TC03V2_G019320 TC02V2_G005320 TC02V2_G006020 TC02V2_G012720 TC03V2_G015720 TC05V2_G006780 TC05V2_G006940 TC05V2_G011810 TC05V2_G021260 TC08V2_G003620 TC09V2_G017090 TC09V2_G020000 TC09V2_G026960 TC10V2_G003400
0.000928306	26	103	2.16985	GO:0072330 Monocarboxylic acid biosynthetic process	TC10V2_G000510 TC10V2_G003520 TC08V2_G001490 TC09V2_G006890 TC02V2_G006850 TC02V2_G020260 TC02V2_G023820 TC03V2_G021300 TC03V2_G025230 TC04V2_G004410 TC05V2_G005360 TC05V2_G014380 TC05V2_G015560 TC08V2_G002200 TC09V2_G006360 TC09V2_G010210 TC09V2_G012690 TC09V2_G018310 TC09V2_G027760 TC10V2_G004640 TC10V2_G004940 TC10V2_G004950 TC09V2_G013440 TC02V2_G011910 TC02V2_G015230 TC03V2_G015440
0.00100081	107	647	1.42158	GO:0032501 Multicellular organismal process	TC03V2_G022000 TC04V2_G003520 TC05V2_G024100 TC07V2_G003870 TC09V2_G023800 TC05V2_G013990 TC09V2_G028790 TC10V2_G006120 TC02V2_G002160 TC02V2_G003860 TC02V2_G005000 TC02V2_G005320 TC02V2_G007010 TC02V2_G007730 TC02V2_G010130 TC02V2_G012230 TC02V2_G012560 TC02V2_G016860 TC02V2_G017320 TC02V2_G022210 TC02V2_G025310 TC03V2_G005950 TC03V2_G009310 TC03V2_G012860 TC03V2_G016010 TC03V2_G018410 TC05V2_G0…
0.00101261	356	2561	1.19491	GO:0019538 Protein metabolic process	TC01V2_G000330 TC02V2_G003370 TC02V2_G004620 TC02V2_G004720 TC02V2_G004810 TC02V2_G005260 TC02V2_G007730 TC02V2_G009260 TC02V2_G009470 TC02V2_G010090 TC02V2_G012260 TC02V2_G015700 TC02V2_G018290 TC02V2_G022140 TC02V2_G022210 TC02V2_G023390 TC02V2_G029140 TC03V2_G002390 TC03V2_G003520 TC03V2_G005950 TC03V2_G010070 TC03V2_G011650 TC03V2_G016060 TC03V2_G017080 TC03V2_G019250 TC03V2_G020050 TC03V2_G0…
0.00110419	98	584	1.44247	GO:0007275 Multicellular organism development	TC03V2_G022000 TC04V2_G003520 TC09V2_G023800 TC09V2_G028790 TC10V2_G006120 TC02V2_G002160 TC02V2_G003860 TC02V2_G005320 TC02V2_G007010 TC02V2_G007730 TC02V2_G010130 TC02V2_G012230 TC02V2_G012560 TC02V2_G016860 TC02V2_G017320 TC02V2_G022210 TC02V2_G025310 TC03V2_G005950 TC03V2_G009310 TC03V2_G012860 TC03V2_G016010 TC03V2_G018410 TC05V2_G003430 TC05V2_G009810 TC05V2_G012050 TC05V2_G014760 TC05V2_G0…
0.00112671	27	110	2.10991	GO:1901293 Nucleoside phosphate biosynthetic process	TC03V2_G000670 TC03V2_G025400 TC09V2_G008070 TC10V2_G005570 TC02V2_G000010 TC02V2_G000550 TC02V2_G010610 TC02V2_G018570 TC02V2_G020430 TC02V2_G020820 TC02V2_G028780 TC03V2_G008360 TC03V2_G010100 TC03V2_G010350 TC03V2_G019660 TC03V2_G024960 TC04V2_G007870 TC05V2_G001120 TC05V2_G002870 TC05V2_G004160 TC05V2_G013650 TC07V2_G006340 TC09V2_G001670 TC09V2_G002080 TC09V2_G004520 TC10V2_G003800 TC10V2_G0…
0.00113108	9	19	4.07176	GO:0051156 Glucose 6-phosphate metabolic process	TC02V2_G017100 TC02V2_G027440 TC04V2_G002430 TC02V2_G016230 TC02V2_G024220 TC03V2_G007660 TC03V2_G017050 TC03V2_G024320 TC05V2_G023800
0.00114794	10	23	3.73736	GO:1902531 Regulation of intracellular signal transduction	TC10V2_G010520 TC02V2_G029270 TC03V2_G024620 TC04V2_G007410 TC05V2_G000840 TC06V2_G000400 TC09V2_G005920 TC09V2_G029720 TC03V2_G009930 TC03V2_G016600
0.00125281	7	12	5.0143	GO:0071470 Cellular response to osmotic stress	TC02V2_G016860 TC03V2_G016010 TC05V2_G020250 TC09V2_G022030 TC10V2_G003280 TC05V2_G020780 TC03V2_G024000
0.00130239	15	46	2.80302	GO:0046618 Xenobiotic export from cell	TC02V2_G022490 TC02V2_G022530 TC02V2_G022550 TC02V2_G027080 TC03V2_G003340 TC03V2_G003350 TC03V2_G003360 TC03V2_G021980 TC03V2_G022660 TC05V2_G019920 TC07V2_G007570 TC07V2_G007580 TC07V2_G007600 TC07V2_G007680 TC09V2_G008630
0.00130239	15	46	2.80302	GO:1990961 Xenobiotic detoxification by transmembrane export across the plasma membrane	TC02V2_G022490 TC02V2_G022530 TC02V2_G022550 TC02V2_G027080 TC03V2_G003340 TC03V2_G003350 TC03V2_G003360 TC03V2_G021980 TC03V2_G022660 TC05V2_G019920 TC07V2_G007570 TC07V2_G007580 TC07V2_G007600 TC07V2_G007680 TC09V2_G008630
0.00130536	42	203	1.77847	GO:0035556 Intracellular signal transduction	TC02V2_G009440 TC02V2_G012260 TC02V2_G023720 TC03V2_G005950 TC05V2_G009500 TC05V2_G013420 TC08V2_G002650 TC09V2_G019560 TC09V2_G020500 TC09V2_G028220 TC10V2_G010520 TC02V2_G007010 TC02V2_G010690 TC02V2_G017440 TC02V2_G020880 TC02V2_G022000 TC02V2_G026350 TC02V2_G029270 TC03V2_G000130 TC03V2_G000430 TC03V2_G016470 TC03V2_G019820 TC03V2_G020360 TC03V2_G024620 TC04V2_G007410 TC05V2_G000840 TC05V2_G0…
0.00135526	41	197	1.789	GO:0090407 Organophosphate biosynthetic process	TC03V2_G000670 TC03V2_G025400 TC05V2_G001360 TC06V2_G001500 TC09V2_G008070 TC10V2_G005570 TC02V2_G000010 TC02V2_G000550 TC02V2_G005320 TC02V2_G010610 TC02V2_G018570 TC02V2_G020430 TC02V2_G020820 TC02V2_G022000 TC02V2_G027160 TC02V2_G028780 TC03V2_G008360 TC03V2_G010100 TC03V2_G010350 TC03V2_G011830 TC03V2_G019660 TC03V2_G024960 TC04V2_G007870 TC05V2_G001120 TC05V2_G002870 TC05V2_G004160 TC05V2_G0…
0.0013873	6	9	5.73062	GO:0006265 Dna topological change	TC05V2_G004580 TC05V2_G011160 TC07V2_G002270 TC09V2_G018620 TC10V2_G003410 TC10V2_G010420
0.0013873	6	9	5.73062	GO:0006536 Glutamate metabolic process	TC02V2_G025960 TC03V2_G006840 TC03V2_G016250 TC05V2_G011590 TC02V2_G011030 TC03V2_G006250
0.00156787	24	95	2.1716	GO:1901615 Organic hydroxy compound metabolic process	TC01V2_G000620 TC02V2_G002560 TC02V2_G012420 TC03V2_G005020 TC04V2_G001140 TC05V2_G001360 TC05V2_G001930 TC05V2_G005370 TC09V2_G003770 TC09V2_G010320 TC10V2_G000510 TC08V2_G000770 TC02V2_G002570 TC02V2_G002590 TC02V2_G002600 TC02V2_G005320 TC02V2_G009940 TC03V2_G011830 TC04V2_G000020 TC06V2_G007290 TC07V2_G004400 TC09V2_G025570 TC03V2_G009930 TC06V2_G000370
0.00164111	4	4	8.59593	GO:0002252 Immune effector process	TC05V2_G012050 TC08V2_G005380 TC04V2_G001370 TC03V2_G024000
0.00164111	15	47	2.74338	GO:0042908 Xenobiotic transport	TC02V2_G022490 TC02V2_G022530 TC02V2_G022550 TC02V2_G027080 TC03V2_G003340 TC03V2_G003350 TC03V2_G003360 TC03V2_G021980 TC03V2_G022660 TC05V2_G019920 TC07V2_G007570 TC07V2_G007580 TC07V2_G007600 TC07V2_G007680 TC09V2_G008630
0.00164111	4	4	8.59593	GO:1990547 Mitochondrial phosphate ion transmembrane transport	TC01V2_G000210 TC02V2_G012250 TC03V2_G011380 TC04V2_G003870
0.00164111	4	4	8.59593	GO:0009682 Induced systemic resistance	TC05V2_G012050 TC08V2_G005380 TC04V2_G001370 TC05V2_G022190
0.00172371	9	20	3.86817	GO:0005985 Sucrose metabolic process	TC02V2_G005360 TC05V2_G002170 TC08V2_G003680 TC03V2_G006540 TC04V2_G004900 TC09V2_G001960 TC09V2_G011510 TC09V2_G024110 TC10V2_G004190
0.00172371	9	20	3.86817	GO:0006612 Protein targeting to membrane	TC03V2_G010680 TC04V2_G003190 TC06V2_G002420 TC05V2_G005030 TC05V2_G009180 TC02V2_G023670 TC03V2_G011510 TC05V2_G007860 TC09V2_G002560
0.00173826	19	68	2.40181	GO:0050832 Defense response to fungus	TC01V2_G000700 TC02V2_G003850 TC02V2_G002160 TC02V2_G007010 TC05V2_G023440 TC06V2_G001770 TC06V2_G002080 TC06V2_G007130 TC08V2_G005380 TC09V2_G003980 TC04V2_G005100 TC05V2_G007130 TC05V2_G009180 TC09V2_G013440 TC03V2_G016670 TC05V2_G024130 TC08V2_G001490 TC09V2_G023200 TC09V2_G028320
0.00197544	13	38	2.94071	GO:0005984 Disaccharide metabolic process	TC02V2_G005360 TC05V2_G002170 TC08V2_G003680 TC02V2_G021440 TC02V2_G026590 TC03V2_G000550 TC03V2_G006540 TC03V2_G025630 TC04V2_G004900 TC09V2_G001960 TC09V2_G011510 TC09V2_G024110 TC10V2_G004190
0.0021148	11	29	3.26053	GO:0009069 Serine family amino acid metabolic process	TC03V2_G018370 TC03V2_G019250 TC05V2_G020100 TC01V2_G000590 TC02V2_G007260 TC02V2_G008720 TC06V2_G001410 TC07V2_G001500 TC09V2_G004480 TC09V2_G004690 TC09V2_G007960
0.00226066	28	121	1.98914	GO:0034655 Nucleobase-containing compound catabolic process	TC02V2_G018410 TC03V2_G000780 TC03V2_G009260 TC03V2_G019320 TC05V2_G014960 TC09V2_G006530 TC02V2_G005320 TC02V2_G006020 TC02V2_G012720 TC03V2_G009830 TC03V2_G015720 TC03V2_G019610 TC05V2_G006780 TC05V2_G006940 TC05V2_G011810 TC05V2_G020190 TC05V2_G021260 TC06V2_G001490 TC06V2_G003240 TC08V2_G003620 TC09V2_G016310 TC09V2_G017090 TC09V2_G020000 TC09V2_G025740 TC09V2_G026960 TC10V2_G003400 TC05V2_G0…
0.00226066	7	13	4.62858	GO:0042026 Protein refolding	TC10V2_G009820 TC02V2_G000770 TC02V2_G027490 TC04V2_G007780 TC06V2_G007910 TC09V2_G001530 TC09V2_G017180
0.00226066	93	561	1.42499	GO:0044085 Cellular component biogenesis	TC02V2_G005840 TC02V2_G009700 TC02V2_G017650 TC03V2_G000780 TC03V2_G013370 TC03V2_G021440 TC03V2_G025950 TC04V2_G008660 TC05V2_G003750 TC05V2_G003760 TC05V2_G014140 TC05V2_G016150 TC05V2_G026070 TC05V2_G026730 TC09V2_G004540 TC09V2_G008530 TC09V2_G012890 TC09V2_G014760 TC09V2_G025970 TC09V2_G025980 TC09V2_G027340 TC09V2_G027890 TC10V2_G003820 TC10V2_G005180 TC10V2_G014570 TC03V2_G009930 TC03V2_G0…
0.00226066	18	64	2.41761	GO:0044272 Sulfur compound biosynthetic process	TC03V2_G000670 TC03V2_G018370 TC05V2_G005860 TC05V2_G020100 TC05V2_G027320 TC02V2_G018220 TC10V2_G001090 TC02V2_G008910 TC02V2_G008950 TC02V2_G020820 TC03V2_G023280 TC05V2_G020400 TC07V2_G001500 TC07V2_G004400 TC09V2_G007960 TC09V2_G022120 TC09V2_G025570 TC10V2_G007790
0.00239639	12	34	3.03386	GO:0000096 Sulfur amino acid metabolic process	TC03V2_G018370 TC05V2_G020100 TC03V2_G006780 TC05V2_G000840 TC02V2_G008910 TC02V2_G008950 TC05V2_G020400 TC07V2_G001500 TC09V2_G007960 TC09V2_G020900 TC09V2_G022120 TC09V2_G028810
0.00240054	17	59	2.47679	GO:0051273 Beta-glucan metabolic process	TC09V2_G012890 TC02V2_G012440 TC02V2_G015220 TC03V2_G009950 TC03V2_G025950 TC05V2_G009940 TC05V2_G012320 TC05V2_G015690 TC05V2_G017740 TC07V2_G001020 TC08V2_G003540 TC09V2_G018150 TC09V2_G018210 TC10V2_G000390 TC10V2_G002010 TC05V2_G014620 TC06V2_G000370
0.00251093	16	54	2.54694	GO:0051668 Localization within membrane	TC03V2_G010680 TC03V2_G017970 TC04V2_G003190 TC05V2_G012620 TC06V2_G002420 TC02V2_G014400 TC05V2_G005030 TC05V2_G009180 TC02V2_G004110 TC02V2_G023670 TC03V2_G011510 TC05V2_G007860 TC05V2_G014210 TC09V2_G002560 TC09V2_G025930 TC10V2_G005500
0.00251093	16	54	2.54694	GO:0009826 Unidimensional cell growth	TC07V2_G003870 TC05V2_G013990 TC02V2_G005000 TC03V2_G018410 TC04V2_G003860 TC05V2_G014760 TC08V2_G002950 TC08V2_G003730 TC10V2_G009720 TC06V2_G000390 TC02V2_G026220 TC03V2_G009930 TC04V2_G000540 TC05V2_G011200 TC05V2_G024090 TC10V2_G000390
0.00252963	13	39	2.86531	GO:0043648 Dicarboxylic acid metabolic process	TC02V2_G029070 TC02V2_G002650 TC02V2_G025960 TC03V2_G006840 TC03V2_G007420 TC03V2_G014090 TC03V2_G016250 TC03V2_G019880 TC04V2_G007560 TC05V2_G011590 TC07V2_G008540 TC02V2_G011030 TC03V2_G006250
0.00252963	13	39	2.86531	GO:0010038 Response to metal ion	TC05V2_G004370 TC03V2_G009310 TC03V2_G025410 TC05V2_G000020 TC09V2_G006390 TC10V2_G004720 TC02V2_G012040 TC02V2_G012360 TC03V2_G000200 TC03V2_G015950 TC04V2_G000020 TC05V2_G000700 TC03V2_G006780
0.00284373	6	10	5.15756	GO:0030026 Intracellular manganese ion homeostasis	TC01V2_G000080 TC02V2_G003430 TC02V2_G003440 TC02V2_G012040 TC06V2_G001230 TC10V2_G004720
0.00284373	6	10	5.15756	GO:0055071 Manganese ion homeostasis	TC01V2_G000080 TC02V2_G003430 TC02V2_G003440 TC02V2_G012040 TC06V2_G001230 TC10V2_G004720
0.0030983	16	55	2.50064	GO:1901292 Nucleoside phosphate catabolic process	TC02V2_G018410 TC03V2_G009260 TC03V2_G019320 TC02V2_G005320 TC02V2_G006020 TC02V2_G012720 TC03V2_G015720 TC05V2_G006780 TC05V2_G006940 TC05V2_G011810 TC05V2_G021260 TC08V2_G003620 TC09V2_G017090 TC09V2_G020000 TC09V2_G026960 TC10V2_G003400
0.00324484	20	77	2.23271	GO:1905392 Plant organ morphogenesis	TC02V2_G002160 TC02V2_G003860 TC02V2_G007010 TC02V2_G010130 TC02V2_G017320 TC02V2_G025310 TC03V2_G018410 TC05V2_G003430 TC05V2_G014760 TC07V2_G007470 TC08V2_G001820 TC09V2_G003980 TC09V2_G028220 TC10V2_G009720 TC03V2_G006670 TC03V2_G018820 TC06V2_G000370 TC09V2_G017930 TC09V2_G028810 TC10V2_G000390
0.00328412	13	40	2.79368	GO:0007034 Vacuolar transport	TC02V2_G009470 TC10V2_G006980 TC05V2_G017880 TC02V2_G029280 TC05V2_G017790 TC06V2_G000400 TC09V2_G007100 TC09V2_G008590 TC09V2_G024690 TC09V2_G028730 TC09V2_G029400 TC10V2_G003320 TC03V2_G006950
0.00331222	10	26	3.30613	GO:0009201 Ribonucleoside triphosphate biosynthetic process	TC09V2_G008070 TC10V2_G005570 TC02V2_G000010 TC02V2_G018570 TC03V2_G008360 TC03V2_G010100 TC03V2_G019660 TC03V2_G024960 TC09V2_G002080 TC09V2_G004520
0.00331222	10	26	3.30613	GO:0009225 Nucleotide-sugar metabolic process	TC04V2_G008660 TC02V2_G028210 TC10V2_G001090 TC02V2_G028780 TC04V2_G000010 TC04V2_G007870 TC05V2_G002870 TC05V2_G004160 TC09V2_G000770 TC10V2_G003800
0.00352452	17	61	2.39559	GO:0060560 Developmental growth involved in morphogenesis	TC07V2_G003870 TC05V2_G013990 TC02V2_G005000 TC02V2_G025310 TC03V2_G018410 TC04V2_G003860 TC05V2_G014760 TC08V2_G002950 TC08V2_G003730 TC10V2_G009720 TC06V2_G000390 TC02V2_G026220 TC03V2_G009930 TC04V2_G000540 TC05V2_G011200 TC05V2_G024090 TC10V2_G000390
0.00354741	19	72	2.26837	GO:0072522 Purine-containing compound biosynthetic process	TC03V2_G000670 TC03V2_G025400 TC09V2_G008070 TC10V2_G005570 TC02V2_G000550 TC02V2_G018570 TC02V2_G020430 TC02V2_G020820 TC03V2_G008360 TC03V2_G010100 TC03V2_G019660 TC03V2_G024960 TC05V2_G001120 TC05V2_G013650 TC09V2_G001670 TC09V2_G002080 TC09V2_G004520 TC10V2_G006240 TC10V2_G007790
0.00369162	7	14	4.29797	GO:0042542 Response to hydrogen peroxide	TC01V2_G000540 TC09V2_G025970 TC09V2_G025980 TC03V2_G004850 TC05V2_G000700 TC02V2_G014080 TC03V2_G010100
0.00369162	7	14	4.29797	GO:1903825 Organic acid transmembrane transport	TC02V2_G011030 TC03V2_G010300 TC04V2_G002660 TC07V2_G002460 TC07V2_G003970 TC09V2_G017330 TC04V2_G007160
0.00369162	7	14	4.29797	GO:1905039 Carboxylic acid transmembrane transport	TC02V2_G011030 TC03V2_G010300 TC04V2_G002660 TC07V2_G002460 TC07V2_G003970 TC09V2_G017330 TC04V2_G007160
0.00369162	9	22	3.51652	GO:0009070 Serine family amino acid biosynthetic process	TC03V2_G018370 TC05V2_G020100 TC01V2_G000590 TC02V2_G007260 TC02V2_G008720 TC06V2_G001410 TC07V2_G001500 TC09V2_G004480 TC09V2_G007960
0.00369162	9	22	3.51652	GO:0009145 Purine nucleoside triphosphate biosynthetic process	TC09V2_G008070 TC10V2_G005570 TC02V2_G018570 TC03V2_G008360 TC03V2_G010100 TC03V2_G019660 TC03V2_G024960 TC09V2_G002080 TC09V2_G004520
0.00369162	9	22	3.51652	GO:0009206 Purine ribonucleoside triphosphate biosynthetic process	TC09V2_G008070 TC10V2_G005570 TC02V2_G018570 TC03V2_G008360 TC03V2_G010100 TC03V2_G019660 TC03V2_G024960 TC09V2_G002080 TC09V2_G004520
0.00373285	11	31	3.05017	GO:0009064 Glutamine family amino acid metabolic process	TC05V2_G011950 TC02V2_G005950 TC02V2_G025960 TC03V2_G004620 TC03V2_G006840 TC03V2_G016250 TC04V2_G004560 TC05V2_G011590 TC10V2_G002870 TC02V2_G011030 TC03V2_G006250
0.00380911	18	67	2.30936	GO:0009409 Response to cold	TC07V2_G004880 TC02V2_G025310 TC03V2_G007020 TC05V2_G018130 TC07V2_G004620 TC09V2_G006390 TC10V2_G001290 TC10V2_G005860 TC10V2_G011010 TC02V2_G026220 TC03V2_G016600 TC03V2_G024320 TC04V2_G007310 TC05V2_G000700 TC09V2_G020380 TC02V2_G022320 TC09V2_G028320 TC10V2_G003290
0.00385709	15	51	2.52822	GO:0006164 Purine nucleotide biosynthetic process	TC03V2_G025400 TC09V2_G008070 TC10V2_G005570 TC02V2_G000550 TC02V2_G018570 TC02V2_G020430 TC03V2_G008360 TC03V2_G010100 TC03V2_G019660 TC03V2_G024960 TC05V2_G001120 TC05V2_G013650 TC09V2_G001670 TC09V2_G002080 TC09V2_G004520
0.00385709	21	84	2.14898	GO:0006633 Fatty acid biosynthetic process	TC10V2_G003520 TC08V2_G001490 TC09V2_G006890 TC02V2_G006850 TC02V2_G020260 TC02V2_G023820 TC03V2_G021300 TC03V2_G025230 TC04V2_G004410 TC05V2_G014380 TC05V2_G015560 TC08V2_G002200 TC09V2_G006360 TC09V2_G010210 TC09V2_G012690 TC09V2_G018310 TC09V2_G027760 TC10V2_G004640 TC10V2_G004940 TC10V2_G004950 TC02V2_G015230
0.00385709	8	18	3.82042	GO:0009699 Phenylpropanoid biosynthetic process	TC02V2_G006710 TC05V2_G005360 TC06V2_G003600 TC09V2_G017970 TC03V2_G017820 TC03V2_G006670 TC06V2_G008120 TC10V2_G003290
0.00394843	12	36	2.86531	GO:0009073 Aromatic amino acid family biosynthetic process	TC09V2_G024320 TC09V2_G025450 TC02V2_G029070 TC02V2_G011200 TC03V2_G001100 TC03V2_G019880 TC04V2_G007560 TC07V2_G003960 TC09V2_G021830 TC10V2_G001930 TC10V2_G005920 TC10V2_G014160
0.0042952	48	256	1.61174	GO:0032870 Cellular response to hormone stimulus	TC03V2_G018980 TC05V2_G000660 TC05V2_G012050 TC08V2_G004850 TC10V2_G000030 TC09V2_G020080 TC02V2_G003750 TC02V2_G004620 TC02V2_G007010 TC02V2_G016860 TC02V2_G020880 TC03V2_G000130 TC03V2_G016070 TC03V2_G018820 TC03V2_G018830 TC03V2_G020360 TC04V2_G003810 TC05V2_G000840 TC05V2_G002230 TC05V2_G011770 TC05V2_G023460 TC06V2_G000400 TC06V2_G001550 TC06V2_G007740 TC07V2_G009860 TC08V2_G002950 TC08V2_G0…
0.00443101	10	27	3.18368	GO:0009142 Nucleoside triphosphate biosynthetic process	TC09V2_G008070 TC10V2_G005570 TC02V2_G000010 TC02V2_G018570 TC03V2_G008360 TC03V2_G010100 TC03V2_G019660 TC03V2_G024960 TC09V2_G002080 TC09V2_G004520
0.00466198	48	257	1.60547	GO:0071495 Cellular response to endogenous stimulus	TC03V2_G018980 TC05V2_G000660 TC05V2_G012050 TC08V2_G004850 TC10V2_G000030 TC09V2_G020080 TC02V2_G003750 TC02V2_G004620 TC02V2_G007010 TC02V2_G016860 TC02V2_G020880 TC03V2_G000130 TC03V2_G016070 TC03V2_G018820 TC03V2_G018830 TC03V2_G020360 TC04V2_G003810 TC05V2_G000840 TC05V2_G002230 TC05V2_G011770 TC05V2_G023460 TC06V2_G000400 TC06V2_G001550 TC06V2_G007740 TC07V2_G009860 TC08V2_G002950 TC08V2_G0…
0.00481313	19	74	2.20706	GO:0140546 Defense response to symbiont	TC05V2_G012050 TC02V2_G011910 TC03V2_G015440 TC02V2_G012560 TC05V2_G023440 TC06V2_G000400 TC08V2_G005380 TC09V2_G012550 TC09V2_G013760 TC04V2_G001370 TC09V2_G017930 TC09V2_G028270 TC02V2_G001050 TC02V2_G027390 TC03V2_G002170 TC03V2_G009930 TC05V2_G022190 TC09V2_G020080 TC09V2_G028810
0.00481313	36	178	1.7385	GO:0006790 Sulfur compound metabolic process	TC02V2_G020520 TC03V2_G000670 TC03V2_G009830 TC03V2_G018370 TC05V2_G005860 TC05V2_G020100 TC05V2_G027320 TC08V2_G003510 TC09V2_G019590 TC02V2_G018220 TC03V2_G006780 TC05V2_G000840 TC10V2_G001090 TC01V2_G000160 TC02V2_G008910 TC02V2_G008950 TC02V2_G012420 TC02V2_G020540 TC02V2_G020550 TC02V2_G020820 TC03V2_G023280 TC05V2_G002430 TC05V2_G002450 TC05V2_G020400 TC07V2_G001500 TC07V2_G002830 TC07V2_G0…
0.00496282	14	47	2.56049	GO:0019684 Photosynthesis light reaction	TC02V2_G017710 TC05V2_G001500 TC10V2_G005860 TC02V2_G011830 TC02V2_G014400 TC03V2_G007500 TC03V2_G016010 TC03V2_G022330 TC05V2_G013410 TC07V2_G005960 TC10V2_G001710 TC02V2_G003710 TC05V2_G020270 TC09V2_G000520
0.00509872	13	42	2.66065	GO:0009311 Oligosaccharide metabolic process	TC02V2_G005360 TC05V2_G002170 TC08V2_G003680 TC02V2_G021440 TC02V2_G026590 TC03V2_G000550 TC03V2_G006540 TC03V2_G025630 TC04V2_G004900 TC09V2_G001960 TC09V2_G011510 TC09V2_G024110 TC10V2_G004190
0.00534051	22	92	2.05555	GO:0048589 Developmental growth	TC07V2_G003870 TC05V2_G013990 TC02V2_G005000 TC02V2_G022210 TC02V2_G025310 TC03V2_G018410 TC04V2_G003860 TC05V2_G014760 TC08V2_G002950 TC08V2_G003730 TC09V2_G030040 TC10V2_G009720 TC06V2_G000390 TC02V2_G026220 TC03V2_G009930 TC04V2_G000540 TC05V2_G011200 TC05V2_G024090 TC09V2_G016950 TC09V2_G028790 TC09V2_G028810 TC10V2_G000390
0.00572632	8	19	3.61934	GO:0009765 Photosynthesis light harvesting	TC02V2_G017710 TC05V2_G001500 TC10V2_G005860 TC02V2_G011830 TC03V2_G007500 TC05V2_G013410 TC07V2_G005960 TC10V2_G001710
0.00584171	7	15	4.01144	GO:0070726 Cell wall assembly	TC03V2_G008620 TC03V2_G008630 TC03V2_G008640 TC04V2_G008600 TC04V2_G008610 TC04V2_G007160 TC10V2_G000390
0.00584171	7	15	4.01144	GO:0071668 Plant-type cell wall assembly	TC03V2_G008620 TC03V2_G008630 TC03V2_G008640 TC04V2_G008600 TC04V2_G008610 TC04V2_G007160 TC10V2_G000390
0.00600608	22	93	2.03345	GO:0015979 Photosynthesis	TC02V2_G017710 TC05V2_G001500 TC10V2_G005860 TC02V2_G011830 TC02V2_G014400 TC03V2_G007500 TC03V2_G016010 TC03V2_G022330 TC03V2_G026250 TC05V2_G011210 TC05V2_G013410 TC05V2_G020100 TC06V2_G007470 TC07V2_G005960 TC09V2_G010870 TC09V2_G012330 TC10V2_G001710 TC05V2_G000700 TC02V2_G003710 TC05V2_G002020 TC05V2_G020270 TC09V2_G000520
0.00600608	4	5	6.87675	GO:0002684 Positive regulation of immune system process	TC05V2_G012050 TC08V2_G005380 TC04V2_G001370 TC02V2_G001050
0.00600608	4	5	6.87675	GO:0006102 Isocitrate metabolic process	TC01V2_G000620 TC04V2_G001140 TC05V2_G005370 TC04V2_G000020
0.00600608	4	5	6.87675	GO:0045089 Positive regulation of innate immune response	TC05V2_G012050 TC08V2_G005380 TC04V2_G001370 TC02V2_G001050
0.00600608	4	5	6.87675	GO:0050778 Positive regulation of immune response	TC05V2_G012050 TC08V2_G005380 TC04V2_G001370 TC02V2_G001050
0.00600608	4	5	6.87675	GO:0000303 Response to superoxide	TC05V2_G012880 TC05V2_G020780 TC06V2_G000400 TC10V2_G014220
0.00600608	4	5	6.87675	GO:0000305 Response to oxygen radical	TC05V2_G012880 TC05V2_G020780 TC06V2_G000400 TC10V2_G014220
0.00600608	46	247	1.60086	GO:0009755 Hormone-mediated signaling pathway	TC03V2_G018980 TC05V2_G000660 TC05V2_G012050 TC08V2_G004850 TC10V2_G000030 TC09V2_G020080 TC02V2_G003750 TC02V2_G004620 TC02V2_G007010 TC02V2_G020880 TC03V2_G000130 TC03V2_G016070 TC03V2_G018820 TC03V2_G018830 TC03V2_G020360 TC04V2_G003810 TC05V2_G000840 TC05V2_G002230 TC05V2_G011770 TC05V2_G023460 TC06V2_G000400 TC06V2_G001550 TC06V2_G007740 TC07V2_G009860 TC08V2_G002950 TC08V2_G003650 TC08V2_G0…
0.00617513	41	214	1.64688	GO:0030163 Protein catabolic process	TC02V2_G004620 TC02V2_G004720 TC02V2_G004810 TC02V2_G009470 TC02V2_G015700 TC02V2_G022140 TC03V2_G010070 TC03V2_G017080 TC03V2_G020050 TC03V2_G022360 TC03V2_G026090 TC04V2_G003810 TC05V2_G001750 TC05V2_G008050 TC05V2_G020300 TC05V2_G026020 TC07V2_G004500 TC07V2_G004520 TC08V2_G000140 TC09V2_G006590 TC09V2_G018740 TC09V2_G022040 TC10V2_G009270 TC02V2_G000290 TC02V2_G004510 TC02V2_G004760 TC02V2_G0…
0.00617513	5	8	5.37246	GO:0046219 Indolalkylamine biosynthetic process	TC09V2_G025450 TC02V2_G029070 TC03V2_G001100 TC07V2_G003960 TC10V2_G001930
0.00617513	5	8	5.37246	GO:0000162 Tryptophan biosynthetic process	TC09V2_G025450 TC02V2_G029070 TC03V2_G001100 TC07V2_G003960 TC10V2_G001930
0.00617513	13	43	2.59877	GO:0006576 Biogenic amine metabolic process	TC02V2_G005950 TC02V2_G008650 TC02V2_G008660 TC09V2_G025450 TC02V2_G029070 TC02V2_G008640 TC02V2_G027320 TC03V2_G001100 TC03V2_G016140 TC05V2_G026850 TC07V2_G003960 TC08V2_G002950 TC10V2_G001930
0.00617513	5	8	5.37246	GO:0006638 Neutral lipid metabolic process	TC06V2_G001500 TC02V2_G005320 TC09V2_G007440 TC05V2_G014620 TC10V2_G007450
0.00617513	5	8	5.37246	GO:0006639 Acylglycerol metabolic process	TC06V2_G001500 TC02V2_G005320 TC09V2_G007440 TC05V2_G014620 TC10V2_G007450
0.00617513	5	8	5.37246	GO:0006641 Triglyceride metabolic process	TC06V2_G001500 TC02V2_G005320 TC09V2_G007440 TC05V2_G014620 TC10V2_G007450
0.00656395	20	82	2.09657	GO:0016049 Cell growth	TC07V2_G003870 TC05V2_G013990 TC02V2_G005000 TC02V2_G025310 TC03V2_G018410 TC04V2_G003860 TC05V2_G014760 TC08V2_G002950 TC08V2_G003730 TC10V2_G009720 TC06V2_G000390 TC10V2_G001740 TC02V2_G026220 TC03V2_G009930 TC03V2_G016600 TC04V2_G000540 TC05V2_G011200 TC05V2_G024090 TC06V2_G000370 TC10V2_G000390
0.00670909	15	54	2.38776	GO:0098771 Inorganic ion homeostasis	TC07V2_G008420 TC02V2_G012040 TC04V2_G000540 TC01V2_G000080 TC02V2_G003430 TC02V2_G003440 TC05V2_G000700 TC05V2_G014530 TC06V2_G001230 TC09V2_G029840 TC10V2_G000950 TC10V2_G004720 TC03V2_G004850 TC05V2_G026920 TC09V2_G028810
0.00682134	9	24	3.22348	GO:0042430 Indole-containing compound metabolic process	TC02V2_G008650 TC02V2_G008660 TC09V2_G025450 TC02V2_G029070 TC02V2_G008640 TC03V2_G001100 TC07V2_G003960 TC08V2_G002950 TC10V2_G001930
0.00742254	19	77	2.12107	GO:0080134 Regulation of response to stress	TC05V2_G012050 TC10V2_G010520 TC02V2_G012560 TC03V2_G005950 TC05V2_G024520 TC08V2_G005380 TC09V2_G012550 TC04V2_G001370 TC09V2_G028270 TC02V2_G001050 TC02V2_G014400 TC02V2_G027390 TC03V2_G015440 TC03V2_G016670 TC05V2_G009180 TC05V2_G024130 TC09V2_G008890 TC09V2_G023200 TC09V2_G028320
0.00795815	11	34	2.78104	GO:0018208 Peptidyl-proline modification	TC02V2_G005260 TC02V2_G007730 TC02V2_G009260 TC05V2_G022900 TC08V2_G004280 TC03V2_G019850 TC04V2_G000640 TC09V2_G005050 TC09V2_G024070 TC09V2_G025230 TC10V2_G001480
0.00841179	6	12	4.29797	GO:0006623 Protein targeting to vacuole	TC02V2_G009470 TC05V2_G017880 TC02V2_G029280 TC09V2_G024690 TC09V2_G028730 TC03V2_G006950
0.00858444	7	16	3.76072	GO:0045047 Protein targeting to er	TC03V2_G010680 TC04V2_G003190 TC06V2_G002420 TC02V2_G023670 TC03V2_G011510 TC05V2_G007860 TC09V2_G002560
0.00858444	7	16	3.76072	GO:0072599 Establishment of protein localization to endoplasmic reticulum	TC03V2_G010680 TC04V2_G003190 TC06V2_G002420 TC02V2_G023670 TC03V2_G011510 TC05V2_G007860 TC09V2_G002560
0.00858444	19	78	2.09388	GO:0009165 Nucleotide biosynthetic process	TC03V2_G025400 TC09V2_G008070 TC10V2_G005570 TC02V2_G000010 TC02V2_G000550 TC02V2_G010610 TC02V2_G018570 TC02V2_G020430 TC03V2_G008360 TC03V2_G010100 TC03V2_G010350 TC03V2_G019660 TC03V2_G024960 TC05V2_G001120 TC05V2_G013650 TC07V2_G006340 TC09V2_G001670 TC09V2_G002080 TC09V2_G004520
0.00858444	7	16	3.76072	GO:0009812 Flavonoid metabolic process	TC06V2_G003600 TC10V2_G004990 TC02V2_G029730 TC07V2_G008050 TC09V2_G000520 TC09V2_G028790 TC10V2_G001530
0.00873899	20	84	2.04665	GO:0048193 Golgi vesicle transport	TC02V2_G002920 TC02V2_G009470 TC03V2_G015530 TC05V2_G003410 TC05V2_G021020 TC05V2_G026730 TC08V2_G002370 TC09V2_G002880 TC03V2_G006950 TC03V2_G019750 TC05V2_G011370 TC05V2_G024060 TC06V2_G000630 TC06V2_G003170 TC07V2_G001940 TC09V2_G023550 TC10V2_G003320 TC10V2_G014740 TC04V2_G007410 TC10V2_G007600
0.00925072	9	25	3.09454	GO:0046271 Phenylpropanoid catabolic process	TC05V2_G002190 TC05V2_G002200 TC05V2_G003210 TC05V2_G003220 TC05V2_G003230 TC05V2_G003260 TC09V2_G026700 TC09V2_G027940 TC10V2_G000770
0.00925072	9	25	3.09454	GO:0046274 Lignin catabolic process	TC05V2_G002190 TC05V2_G002200 TC05V2_G003210 TC05V2_G003220 TC05V2_G003230 TC05V2_G003260 TC09V2_G026700 TC09V2_G027940 TC10V2_G000770
0.00931276	13	45	2.48327	GO:0009260 Ribonucleotide biosynthetic process	TC09V2_G008070 TC10V2_G005570 TC02V2_G000010 TC02V2_G018570 TC02V2_G020430 TC03V2_G008360 TC03V2_G010100 TC03V2_G019660 TC03V2_G024960 TC05V2_G001120 TC07V2_G006340 TC09V2_G002080 TC09V2_G004520
0.00931989	41	219	1.60928	GO:0099402 Plant organ development	TC04V2_G003520 TC02V2_G002160 TC02V2_G003860 TC02V2_G005320 TC02V2_G007010 TC02V2_G010130 TC02V2_G016860 TC02V2_G017320 TC02V2_G022210 TC02V2_G025310 TC03V2_G018410 TC05V2_G003430 TC05V2_G012050 TC05V2_G014760 TC06V2_G001550 TC07V2_G007470 TC08V2_G001820 TC09V2_G003980 TC09V2_G028220 TC10V2_G009720 TC10V2_G000640 TC05V2_G000700 TC02V2_G011910 TC03V2_G006130 TC03V2_G006670 TC03V2_G009930 TC03V2_G0…
0.0096082	15	56	2.30248	GO:0009723 Response to ethylene	TC02V2_G007010 TC03V2_G020360 TC05V2_G000840 TC05V2_G022960 TC05V2_G023440 TC06V2_G000400 TC09V2_G029720 TC03V2_G017390 TC04V2_G001370 TC05V2_G020270 TC03V2_G009930 TC03V2_G024000 TC05V2_G024130 TC09V2_G007800 TC09V2_G016080
0.00979623	19	79	2.06738	GO:0061024 Membrane organization	TC03V2_G017970 TC03V2_G019750 TC03V2_G025730 TC04V2_G007400 TC05V2_G021640 TC05V2_G026730 TC09V2_G012090 TC02V2_G001040 TC02V2_G029280 TC05V2_G014210 TC07V2_G007470 TC09V2_G025930 TC10V2_G005500 TC10V2_G014740 TC02V2_G014400 TC03V2_G019210 TC05V2_G004490 TC05V2_G020270 TC09V2_G000520
0.00979623	10	30	2.86531	GO:0070542 Response to fatty acid	TC05V2_G012050 TC02V2_G004620 TC02V2_G007010 TC08V2_G005380 TC02V2_G018220 TC04V2_G001370 TC07V2_G008050 TC03V2_G016670 TC03V2_G020070 TC08V2_G001490
0.00979623	10	30	2.86531	GO:0009753 Response to jasmonic acid	TC05V2_G012050 TC02V2_G004620 TC02V2_G007010 TC08V2_G005380 TC02V2_G018220 TC04V2_G001370 TC07V2_G008050 TC03V2_G016670 TC03V2_G020070 TC08V2_G001490
0.010136	35	180	1.67143	GO:0048583 Regulation of response to stimulus	TC05V2_G012050 TC10V2_G010520 TC02V2_G012560 TC02V2_G029270 TC03V2_G005950 TC03V2_G016600 TC03V2_G024620 TC04V2_G007410 TC05V2_G000840 TC05V2_G024520 TC06V2_G000400 TC08V2_G002950 TC08V2_G005380 TC09V2_G005920 TC09V2_G006390 TC09V2_G012550 TC09V2_G016080 TC09V2_G017520 TC09V2_G029720 TC10V2_G003040 TC04V2_G001370 TC09V2_G028270 TC02V2_G001050 TC02V2_G014400 TC02V2_G027390 TC03V2_G009930 TC03V2_G0…
0.0101603	3	3	8.59593	GO:0002218 Activation of innate immune response	TC05V2_G012050 TC08V2_G005380 TC04V2_G001370
0.0101603	3	3	8.59593	GO:0002253 Activation of immune response	TC05V2_G012050 TC08V2_G005380 TC04V2_G001370
0.0101603	3	3	8.59593	GO:0031537 Regulation of anthocyanin metabolic process	TC09V2_G000520 TC09V2_G028790 TC10V2_G001530
0.0101603	3	3	8.59593	GO:2000069 Regulation of post-embryonic root development	TC09V2_G003980 TC03V2_G009930 TC05V2_G000840
0.0101603	3	3	8.59593	GO:0006949 Syncytium formation	TC02V2_G015050 TC02V2_G012380 TC10V2_G014140
0.0101603	3	3	8.59593	GO:0009864 Induced systemic resistance jasmonic acid mediated signaling pathway	TC05V2_G012050 TC08V2_G005380 TC04V2_G001370
0.0111405	13	46	2.42929	GO:0046390 Ribose phosphate biosynthetic process	TC09V2_G008070 TC10V2_G005570 TC02V2_G000010 TC02V2_G018570 TC02V2_G020430 TC03V2_G008360 TC03V2_G010100 TC03V2_G019660 TC03V2_G024960 TC05V2_G001120 TC07V2_G006340 TC09V2_G002080 TC09V2_G004520
0.0111453	19	80	2.04153	GO:0014070 Response to organic cyclic compound	TC08V2_G004850 TC10V2_G000030 TC02V2_G003750 TC02V2_G016860 TC05V2_G002230 TC06V2_G000400 TC07V2_G009860 TC08V2_G003660 TC09V2_G006800 TC09V2_G025940 TC02V2_G027390 TC05V2_G023780 TC06V2_G000390 TC02V2_G001050 TC02V2_G011910 TC03V2_G009930 TC05V2_G024130 TC07V2_G001120 TC09V2_G018620
0.0112746	5	9	4.77552	GO:0045088 Regulation of innate immune response	TC05V2_G012050 TC08V2_G005380 TC04V2_G001370 TC09V2_G028270 TC02V2_G001050
0.0112746	5	9	4.77552	GO:0071472 Cellular response to salt stress	TC03V2_G016010 TC05V2_G020250 TC09V2_G022030 TC10V2_G003280 TC05V2_G020780
0.0112746	5	9	4.77552	GO:0072350 Tricarboxylic acid metabolic process	TC01V2_G000620 TC04V2_G001140 TC05V2_G005370 TC04V2_G000020 TC05V2_G026850
0.0112746	5	9	4.77552	GO:0120029 Proton export across plasma membrane	TC03V2_G020420 TC04V2_G006050 TC06V2_G003070 TC09V2_G000580 TC09V2_G015140
0.0112746	5	9	4.77552	GO:0006558 L-phenylalanine metabolic process	TC09V2_G024320 TC05V2_G005360 TC07V2_G008370 TC09V2_G021830 TC09V2_G028910
0.0116743	12	41	2.51588	GO:0006414 Translational elongation	TC02V2_G029140 TC03V2_G003520 TC09V2_G021620 TC09V2_G021660 TC10V2_G005620 TC10V2_G005650 TC03V2_G007830 TC03V2_G010460 TC03V2_G021460 TC05V2_G004840 TC09V2_G009130 TC09V2_G021360
0.0120589	7	17	3.5395	GO:0015986 Proton motive force-driven atp synthesis	TC09V2_G008070 TC10V2_G005570 TC02V2_G018570 TC03V2_G008360 TC03V2_G019660 TC09V2_G002080 TC09V2_G004520
0.0120589	7	17	3.5395	GO:0006754 Atp biosynthetic process	TC09V2_G008070 TC10V2_G005570 TC02V2_G018570 TC03V2_G008360 TC03V2_G019660 TC09V2_G002080 TC09V2_G004520
0.0120672	11	36	2.62654	GO:0002831 Regulation of response to biotic stimulus	TC05V2_G012050 TC08V2_G005380 TC09V2_G012550 TC04V2_G001370 TC09V2_G028270 TC02V2_G001050 TC02V2_G027390 TC03V2_G015440 TC03V2_G016670 TC05V2_G024130 TC09V2_G023200
0.0120672	11	36	2.62654	GO:0032101 Regulation of response to external stimulus	TC05V2_G012050 TC08V2_G005380 TC09V2_G012550 TC04V2_G001370 TC09V2_G028270 TC02V2_G001050 TC02V2_G027390 TC03V2_G015440 TC03V2_G016670 TC05V2_G024130 TC09V2_G023200
0.0132	13	47	2.3776	GO:0030243 Cellulose metabolic process	TC09V2_G012890 TC02V2_G012440 TC03V2_G025950 TC05V2_G009940 TC05V2_G012320 TC05V2_G015690 TC05V2_G017740 TC07V2_G001020 TC08V2_G003540 TC10V2_G000390 TC10V2_G002010 TC05V2_G014620 TC06V2_G000370
0.0132	13	47	2.3776	GO:0006066 Alcohol metabolic process	TC01V2_G000620 TC03V2_G005020 TC04V2_G001140 TC05V2_G005370 TC10V2_G000510 TC08V2_G000770 TC02V2_G005320 TC02V2_G009940 TC03V2_G011830 TC04V2_G000020 TC07V2_G004400 TC09V2_G025570 TC03V2_G009930
0.0132	13	47	2.3776	GO:0006888 Endoplasmic reticulum to golgi vesicle-mediated transport	TC02V2_G002920 TC03V2_G015530 TC05V2_G003410 TC05V2_G021020 TC05V2_G026730 TC09V2_G002880 TC03V2_G006950 TC05V2_G024060 TC06V2_G003170 TC07V2_G001940 TC09V2_G023550 TC10V2_G014740 TC10V2_G007600
0.0134048	69	422	1.4055	GO:0048731 System development	TC03V2_G022000 TC04V2_G003520 TC09V2_G023800 TC02V2_G002160 TC02V2_G003860 TC02V2_G005320 TC02V2_G007010 TC02V2_G007730 TC02V2_G010130 TC02V2_G012230 TC02V2_G016860 TC02V2_G017320 TC02V2_G022210 TC02V2_G025310 TC03V2_G018410 TC05V2_G003430 TC05V2_G009810 TC05V2_G012050 TC05V2_G014760 TC06V2_G001550 TC07V2_G003970 TC07V2_G004620 TC07V2_G007470 TC08V2_G001820 TC09V2_G000990 TC09V2_G003980 TC09V2_G0…
0.0137078	4	6	5.73062	GO:0010193 Response to ozone	TC05V2_G020780 TC05V2_G023780 TC05V2_G025150 TC10V2_G000640
0.0137078	4	6	5.73062	GO:0010214 Seed coat development	TC02V2_G017320 TC09V2_G024420 TC10V2_G009720 TC02V2_G009940
0.0137078	4	6	5.73062	GO:1902652 Secondary alcohol metabolic process	TC01V2_G000620 TC04V2_G001140 TC05V2_G005370 TC04V2_G000020
0.0137078	4	6	5.73062	GO:0009809 Lignin biosynthetic process	TC06V2_G003600 TC03V2_G017820 TC06V2_G008120 TC10V2_G003290
0.0138575	215	1542	1.19853	GO:0036211 Protein modification process	TC02V2_G003370 TC02V2_G004720 TC02V2_G005260 TC02V2_G007730 TC02V2_G009260 TC02V2_G010090 TC02V2_G012260 TC02V2_G022140 TC02V2_G022210 TC02V2_G023390 TC03V2_G002390 TC03V2_G003520 TC03V2_G005950 TC03V2_G017080 TC03V2_G019250 TC04V2_G004110 TC05V2_G008050 TC05V2_G009500 TC05V2_G013420 TC05V2_G015030 TC05V2_G020300 TC05V2_G022590 TC05V2_G022900 TC06V2_G003580 TC07V2_G004500 TC07V2_G004520 TC08V2_G0…
0.0140311	12	42	2.45598	GO:0071806 Protein transmembrane transport	TC02V2_G012930 TC03V2_G010680 TC04V2_G003190 TC06V2_G002420 TC02V2_G014400 TC09V2_G024360 TC02V2_G004110 TC05V2_G022540 TC02V2_G011480 TC02V2_G027730 TC06V2_G007710 TC09V2_G030300
0.0141144	8	22	3.12579	GO:0022904 Respiratory electron transport chain	TC03V2_G015500 TC05V2_G017700 TC06V2_G006020 TC09V2_G012740 TC02V2_G005990 TC04V2_G005340 TC05V2_G015560 TC10V2_G014530
0.0141144	8	22	3.12579	GO:0006563 L-serine metabolic process	TC05V2_G020100 TC01V2_G000590 TC02V2_G007260 TC02V2_G008720 TC06V2_G001410 TC07V2_G001500 TC09V2_G004480 TC09V2_G007960
0.0145993	38	205	1.59339	GO:0051603 Proteolysis involved in protein catabolic process	TC02V2_G004620 TC02V2_G004720 TC02V2_G004810 TC02V2_G009470 TC02V2_G015700 TC02V2_G022140 TC03V2_G010070 TC03V2_G017080 TC03V2_G020050 TC03V2_G022360 TC03V2_G026090 TC04V2_G003810 TC05V2_G001750 TC05V2_G008050 TC05V2_G020300 TC05V2_G026020 TC07V2_G004500 TC07V2_G004520 TC08V2_G000140 TC09V2_G006590 TC09V2_G018740 TC09V2_G022040 TC10V2_G009270 TC02V2_G000290 TC02V2_G004760 TC02V2_G024090 TC04V2_G0…
0.0147606	11	37	2.55555	GO:0009152 Purine ribonucleotide biosynthetic process	TC09V2_G008070 TC10V2_G005570 TC02V2_G018570 TC02V2_G020430 TC03V2_G008360 TC03V2_G010100 TC03V2_G019660 TC03V2_G024960 TC05V2_G001120 TC09V2_G002080 TC09V2_G004520
0.0152319	10	32	2.68623	GO:0006816 Calcium ion transport	TC07V2_G008420 TC05V2_G001440 TC05V2_G023620 TC05V2_G023630 TC05V2_G023660 TC07V2_G000330 TC08V2_G005380 TC09V2_G016070 TC09V2_G025280 TC02V2_G015230
0.0161754	19	83	1.96774	GO:0000902 Cell morphogenesis	TC07V2_G003870 TC05V2_G013990 TC02V2_G005000 TC03V2_G009260 TC03V2_G018410 TC04V2_G003860 TC05V2_G014760 TC08V2_G002950 TC08V2_G003730 TC10V2_G009720 TC06V2_G000390 TC02V2_G004760 TC02V2_G026220 TC03V2_G009930 TC04V2_G000540 TC05V2_G011200 TC05V2_G024090 TC09V2_G018620 TC10V2_G000390
0.0167375	7	18	3.34286	GO:0006817 Phosphate ion transport	TC01V2_G000210 TC02V2_G012250 TC03V2_G011380 TC03V2_G015940 TC04V2_G003870 TC10V2_G014450 TC10V2_G007600
0.0167375	7	18	3.34286	GO:0010027 Thylakoid membrane organization	TC09V2_G012090 TC07V2_G007470 TC02V2_G014400 TC03V2_G019210 TC05V2_G004490 TC05V2_G020270 TC09V2_G000520
0.0183544	11	38	2.4883	GO:0021700 Developmental maturation	TC02V2_G010130 TC02V2_G016860 TC02V2_G025310 TC03V2_G005950 TC03V2_G018410 TC05V2_G014760 TC07V2_G003970 TC08V2_G001820 TC03V2_G009930 TC05V2_G015990 TC09V2_G017930
0.0186032	6	14	3.68397	GO:0010215 Cellulose microfibril organization	TC03V2_G008620 TC03V2_G008630 TC03V2_G008640 TC04V2_G008600 TC04V2_G008610 TC10V2_G000390
0.0186032	6	14	3.68397	GO:0015718 Monocarboxylic acid transport	TC07V2_G003690 TC03V2_G010300 TC04V2_G002660 TC07V2_G002460 TC07V2_G003970 TC04V2_G007160
0.0186032	5	10	4.29797	GO:0002682 Regulation of immune system process	TC05V2_G012050 TC08V2_G005380 TC04V2_G001370 TC09V2_G028270 TC02V2_G001050
0.0186032	6	14	3.68397	GO:0030198 Extracellular matrix organization	TC03V2_G008620 TC03V2_G008630 TC03V2_G008640 TC04V2_G008600 TC04V2_G008610 TC10V2_G000390
0.0186032	6	14	3.68397	GO:0043062 Extracellular structure organization	TC03V2_G008620 TC03V2_G008630 TC03V2_G008640 TC04V2_G008600 TC04V2_G008610 TC10V2_G000390
0.0186032	5	10	4.29797	GO:0046283 Anthocyanin-containing compound metabolic process	TC02V2_G029730 TC07V2_G008050 TC09V2_G000520 TC09V2_G028790 TC10V2_G001530
0.0186032	5	10	4.29797	GO:0050776 Regulation of immune response	TC05V2_G012050 TC08V2_G005380 TC04V2_G001370 TC09V2_G028270 TC02V2_G001050
0.018944	10	33	2.60483	GO:0010411 Xyloglucan metabolic process	TC04V2_G004470 TC09V2_G014310 TC09V2_G014350 TC09V2_G014360 TC09V2_G014370 TC09V2_G014390 TC09V2_G014400 TC09V2_G014430 TC09V2_G014450 TC09V2_G021950
0.0191019	27	135	1.71919	GO:0016051 Carbohydrate biosynthetic process	TC02V2_G017650 TC05V2_G002170 TC09V2_G012890 TC02V2_G006660 TC02V2_G012440 TC02V2_G015220 TC02V2_G021440 TC02V2_G026590 TC03V2_G000550 TC03V2_G009950 TC03V2_G025630 TC03V2_G025950 TC03V2_G026250 TC05V2_G012320 TC05V2_G017740 TC07V2_G001020 TC08V2_G002470 TC09V2_G001960 TC09V2_G011510 TC09V2_G018150 TC09V2_G018210 TC10V2_G000390 TC03V2_G000200 TC03V2_G016580 TC05V2_G012880 TC05V2_G014620 TC06V2_G0…
0.0192104	9	28	2.76298	GO:0010118 Stomatal movement	TC10V2_G009140 TC09V2_G020080 TC02V2_G007010 TC03V2_G009310 TC02V2_G014400 TC02V2_G015230 TC03V2_G024000 TC05V2_G009180 TC10V2_G007140
0.0210043	17	73	2.00179	GO:0009250 Glucan biosynthetic process	TC09V2_G012890 TC02V2_G006660 TC02V2_G012440 TC02V2_G015220 TC03V2_G009950 TC03V2_G025950 TC05V2_G012320 TC05V2_G017740 TC07V2_G001020 TC08V2_G002470 TC09V2_G018150 TC09V2_G018210 TC10V2_G000390 TC03V2_G016580 TC05V2_G012880 TC05V2_G014620 TC06V2_G000370
0.0210598	52	308	1.45126	GO:0003006 Developmental process involved in reproduction	TC03V2_G022000 TC04V2_G003520 TC05V2_G024100 TC09V2_G023800 TC05V2_G013990 TC02V2_G003860 TC02V2_G005000 TC02V2_G007010 TC02V2_G007730 TC02V2_G012230 TC02V2_G016860 TC02V2_G017320 TC02V2_G022210 TC03V2_G012860 TC05V2_G009810 TC05V2_G014760 TC07V2_G003970 TC07V2_G004620 TC09V2_G000990 TC09V2_G010350 TC09V2_G011170 TC09V2_G024420 TC09V2_G030040 TC10V2_G009720 TC05V2_G000700 TC02V2_G009940 TC02V2_G0…
0.0219664	13	50	2.23494	GO:0009832 Plant-type cell wall biogenesis	TC02V2_G017650 TC03V2_G025950 TC04V2_G008660 TC09V2_G012890 TC03V2_G008620 TC03V2_G008630 TC03V2_G008640 TC04V2_G008600 TC04V2_G008610 TC08V2_G002950 TC10V2_G009720 TC04V2_G007160 TC10V2_G000390
0.0227467	7	19	3.16692	GO:0042773 Atp synthesis coupled electron transport	TC05V2_G017700 TC06V2_G006020 TC09V2_G012740 TC02V2_G005990 TC04V2_G005340 TC05V2_G015560 TC10V2_G014530
0.0227467	7	19	3.16692	GO:0009668 Plastid membrane organization	TC09V2_G012090 TC07V2_G007470 TC02V2_G014400 TC03V2_G019210 TC05V2_G004490 TC05V2_G020270 TC09V2_G000520
0.0227467	56	338	1.42418	GO:0009791 Post-embryonic development	TC03V2_G022000 TC04V2_G003520 TC09V2_G023800 TC02V2_G002160 TC02V2_G003860 TC02V2_G007010 TC02V2_G007730 TC02V2_G012230 TC02V2_G016860 TC02V2_G017320 TC02V2_G022210 TC03V2_G009310 TC05V2_G009810 TC07V2_G003970 TC07V2_G004620 TC09V2_G000990 TC09V2_G003980 TC09V2_G010350 TC09V2_G011170 TC09V2_G017520 TC09V2_G024420 TC09V2_G028220 TC09V2_G030040 TC10V2_G009720 TC05V2_G000700 TC05V2_G015450 TC02V2_G0…
0.0229314	14	56	2.14898	GO:0009639 Response to red or far red light	TC03V2_G009310 TC03V2_G016010 TC05V2_G027580 TC09V2_G017520 TC09V2_G025770 TC10V2_G002740 TC10V2_G005860 TC02V2_G026220 TC02V2_G027730 TC03V2_G010100 TC05V2_G025210 TC06V2_G007710 TC09V2_G000520 TC09V2_G003340
0.0230162	27	137	1.69409	GO:0071396 Cellular response to lipid	TC03V2_G018980 TC05V2_G000660 TC05V2_G012050 TC08V2_G004850 TC10V2_G000030 TC09V2_G020080 TC02V2_G003750 TC02V2_G004620 TC02V2_G007010 TC02V2_G016860 TC03V2_G016070 TC05V2_G002230 TC07V2_G009860 TC08V2_G003650 TC08V2_G003660 TC08V2_G005380 TC09V2_G006390 TC09V2_G025940 TC10V2_G003040 TC10V2_G011740 TC04V2_G001370 TC07V2_G008050 TC03V2_G016670 TC05V2_G024130 TC08V2_G000770 TC09V2_G028790 TC10V2_G0…
0.0235218	15	62	2.07966	GO:0022900 Electron transport chain	TC03V2_G015500 TC05V2_G017700 TC06V2_G006020 TC09V2_G012740 TC02V2_G005990 TC02V2_G007320 TC03V2_G022330 TC04V2_G005340 TC05V2_G015560 TC06V2_G001780 TC08V2_G004390 TC09V2_G004540 TC09V2_G006270 TC10V2_G014530 TC09V2_G000520
0.0240753	12	45	2.29225	GO:0015698 Inorganic anion transport	TC09V2_G029190 TC01V2_G000210 TC02V2_G012250 TC03V2_G000990 TC03V2_G011380 TC03V2_G013280 TC03V2_G015940 TC03V2_G017710 TC04V2_G003870 TC06V2_G006110 TC10V2_G014450 TC10V2_G007600
0.0240753	9	29	2.6677	GO:0034728 Nucleosome organization	TC05V2_G003750 TC05V2_G003760 TC09V2_G014760 TC09V2_G027340 TC09V2_G027890 TC10V2_G003820 TC10V2_G005180 TC02V2_G009720 TC03V2_G007070
0.0240753	9	29	2.6677	GO:0006334 Nucleosome assembly	TC05V2_G003750 TC05V2_G003760 TC09V2_G014760 TC09V2_G027340 TC09V2_G027890 TC10V2_G003820 TC10V2_G005180 TC02V2_G009720 TC03V2_G007070
0.0240753	9	29	2.6677	GO:0070972 Protein localization to endoplasmic reticulum	TC03V2_G010680 TC04V2_G003190 TC06V2_G002420 TC08V2_G002370 TC02V2_G023670 TC03V2_G011510 TC05V2_G007860 TC05V2_G017590 TC09V2_G002560
0.0240753	9	29	2.6677	GO:0000413 Protein peptidyl-prolyl isomerization	TC02V2_G005260 TC02V2_G007730 TC05V2_G022900 TC03V2_G019850 TC04V2_G000640 TC09V2_G005050 TC09V2_G024070 TC09V2_G025230 TC10V2_G001480
0.0243422	21	99	1.82338	GO:0009657 Plastid organization	TC09V2_G012090 TC10V2_G011790 TC02V2_G005320 TC03V2_G016010 TC07V2_G003890 TC07V2_G007470 TC02V2_G012500 TC02V2_G014400 TC02V2_G028310 TC02V2_G029120 TC02V2_G029620 TC03V2_G011710 TC03V2_G019210 TC05V2_G004490 TC05V2_G016160 TC05V2_G020270 TC06V2_G006270 TC09V2_G000520 TC09V2_G021830 TC09V2_G024360 TC09V2_G030300
0.0245479	235	1724	1.17172	GO:0043412 Macromolecule modification	TC02V2_G003370 TC02V2_G004720 TC02V2_G005260 TC02V2_G007730 TC02V2_G009260 TC02V2_G010090 TC02V2_G012260 TC02V2_G022140 TC02V2_G022210 TC02V2_G023390 TC03V2_G002390 TC03V2_G003520 TC03V2_G005950 TC03V2_G017080 TC03V2_G019250 TC04V2_G004110 TC05V2_G001760 TC05V2_G007870 TC05V2_G008050 TC05V2_G009500 TC05V2_G013420 TC05V2_G015030 TC05V2_G020300 TC05V2_G022590 TC05V2_G022900 TC06V2_G003580 TC07V2_G0…
0.0254104	13	51	2.19112	GO:0010015 Root morphogenesis	TC02V2_G002160 TC02V2_G010130 TC02V2_G025310 TC03V2_G018410 TC05V2_G014760 TC08V2_G001820 TC09V2_G003980 TC09V2_G028220 TC10V2_G009720 TC03V2_G018820 TC06V2_G000370 TC09V2_G028810 TC10V2_G000390
0.025532	4	7	4.91196	GO:0015976 Carbon utilization	TC02V2_G010720 TC02V2_G021840 TC04V2_G000840 TC10V2_G001530
0.025532	4	7	4.91196	GO:0016104 Triterpenoid biosynthetic process	TC06V2_G002950 TC06V2_G004110 TC06V2_G004180 TC09V2_G017770
0.025532	4	7	4.91196	GO:0035435 Phosphate ion transmembrane transport	TC01V2_G000210 TC02V2_G012250 TC03V2_G011380 TC04V2_G003870
0.025532	4	7	4.91196	GO:0006303 Double-strand break repair via nonhomologous end joining	TC04V2_G004340 TC07V2_G009920 TC02V2_G021150 TC09V2_G015780
0.025532	4	7	4.91196	GO:0070297 Regulation of phosphorelay signal transduction system	TC05V2_G000840 TC06V2_G000400 TC09V2_G029720 TC03V2_G009930
0.025532	4	7	4.91196	GO:2000280 Regulation of root development	TC02V2_G007010 TC09V2_G003980 TC03V2_G009930 TC05V2_G000840
0.025532	4	7	4.91196	GO:0006722 Triterpenoid metabolic process	TC06V2_G002950 TC06V2_G004110 TC06V2_G004180 TC09V2_G017770
0.025532	4	7	4.91196	GO:0010104 Regulation of ethylene-activated signaling pathway	TC05V2_G000840 TC06V2_G000400 TC09V2_G029720 TC03V2_G009930
0.0257031	6	15	3.43837	GO:0120254 Olefinic compound metabolic process	TC10V2_G000510 TC05V2_G000840 TC05V2_G005360 TC03V2_G006780 TC03V2_G009930 TC09V2_G028810
0.0257031	6	15	3.43837	GO:0006534 Cysteine metabolic process	TC03V2_G018370 TC05V2_G020100 TC03V2_G006780 TC07V2_G001500 TC09V2_G007960 TC09V2_G020900
0.0257031	6	15	3.43837	GO:0009813 Flavonoid biosynthetic process	TC06V2_G003600 TC10V2_G004990 TC02V2_G029730 TC07V2_G008050 TC09V2_G000520 TC09V2_G028790
0.0274301	63	393	1.37797	GO:0022414 Reproductive process	TC03V2_G022000 TC04V2_G003520 TC05V2_G004580 TC05V2_G024100 TC09V2_G023800 TC05V2_G013990 TC02V2_G003860 TC02V2_G005000 TC02V2_G007010 TC02V2_G007730 TC02V2_G012230 TC02V2_G015050 TC02V2_G016860 TC02V2_G017320 TC02V2_G022210 TC03V2_G012860 TC05V2_G009810 TC05V2_G014760 TC07V2_G001360 TC07V2_G003970 TC07V2_G004620 TC09V2_G000990 TC09V2_G010350 TC09V2_G011170 TC09V2_G024420 TC09V2_G030040 TC10V2_G0…
0.027707	12	46	2.24242	GO:0006813 Potassium ion transport	TC05V2_G024930 TC02V2_G007240 TC03V2_G000600 TC03V2_G004720 TC04V2_G000540 TC06V2_G001700 TC07V2_G001350 TC09V2_G000820 TC09V2_G003250 TC09V2_G010280 TC09V2_G012730 TC10V2_G009140
0.027707	10	35	2.45598	GO:0000041 Transition metal ion transport	TC03V2_G018020 TC09V2_G029630 TC05V2_G000700 TC05V2_G014530 TC05V2_G014790 TC05V2_G026920 TC07V2_G007230 TC09V2_G029840 TC10V2_G000950 TC10V2_G004720
0.0277875	5	11	3.90724	GO:0002833 Positive regulation of response to biotic stimulus	TC05V2_G012050 TC08V2_G005380 TC04V2_G001370 TC02V2_G001050 TC03V2_G015440
0.0277875	58	357	1.39654	GO:0022607 Cellular component assembly	TC02V2_G009700 TC03V2_G021440 TC05V2_G003750 TC05V2_G003760 TC05V2_G014140 TC05V2_G026070 TC05V2_G026730 TC09V2_G004540 TC09V2_G008530 TC09V2_G014760 TC09V2_G025970 TC09V2_G025980 TC09V2_G027340 TC09V2_G027890 TC10V2_G003820 TC10V2_G005180 TC10V2_G014570 TC03V2_G009930 TC03V2_G011890 TC03V2_G013390 TC03V2_G019210 TC02V2_G009720 TC02V2_G011140 TC02V2_G014080 TC02V2_G014400 TC02V2_G029120 TC03V2_G0…
0.0277875	5	11	3.90724	GO:0032103 Positive regulation of response to external stimulus	TC05V2_G012050 TC08V2_G005380 TC04V2_G001370 TC02V2_G001050 TC03V2_G015440
0.0277875	5	11	3.90724	GO:0046686 Response to cadmium ion	TC03V2_G025410 TC05V2_G000020 TC09V2_G006390 TC03V2_G000200 TC03V2_G006780
0.0277875	5	11	3.90724	GO:0006885 Regulation of ph	TC05V2_G013660 TC05V2_G024930 TC08V2_G002980 TC05V2_G021210 TC10V2_G003320
0.0278243	9	30	2.57878	GO:0016050 Vesicle organization	TC03V2_G019750 TC03V2_G025730 TC04V2_G007400 TC05V2_G021640 TC05V2_G026730 TC02V2_G029280 TC08V2_G004040 TC09V2_G009960 TC10V2_G014740
0.0278243	7	20	3.00858	GO:0018105 Peptidyl-serine phosphorylation	TC02V2_G012260 TC03V2_G005950 TC05V2_G009500 TC05V2_G013420 TC09V2_G009070 TC09V2_G019560 TC09V2_G020500
0.0278243	7	20	3.00858	GO:0018209 Peptidyl-serine modification	TC02V2_G012260 TC03V2_G005950 TC05V2_G009500 TC05V2_G013420 TC09V2_G009070 TC09V2_G019560 TC09V2_G020500
0.0278243	3	4	6.44695	GO:0019430 Removal of superoxide radicals	TC05V2_G012880 TC05V2_G020780 TC10V2_G014220
0.0278243	3	4	6.44695	GO:0019441 Tryptophan catabolic process to kynurenine	TC02V2_G008650 TC02V2_G008660 TC02V2_G008640
0.0278243	3	4	6.44695	GO:0030245 Cellulose catabolic process	TC05V2_G009940 TC05V2_G015690 TC08V2_G003540
0.0278243	3	4	6.44695	GO:0030641 Regulation of cellular ph	TC05V2_G024930 TC08V2_G002980 TC10V2_G003320
0.0278243	3	4	6.44695	GO:0005987 Sucrose catabolic process	TC02V2_G005360 TC08V2_G003680 TC09V2_G024110
0.0278243	3	4	6.44695	GO:0031053 Primary mirna processing	TC03V2_G016670 TC09V2_G017410 TC09V2_G020080
0.0278243	3	4	6.44695	GO:0031407 Oxylipin metabolic process	TC08V2_G001490 TC09V2_G006890 TC09V2_G003980
0.0278243	3	4	6.44695	GO:0032107 Regulation of response to nutrient levels	TC05V2_G024520 TC03V2_G016600 TC10V2_G001530
0.0278243	3	4	6.44695	GO:0042436 Indole-containing compound catabolic process	TC02V2_G008650 TC02V2_G008660 TC02V2_G008640
0.0278243	3	4	6.44695	GO:0046168 Glycerol-3-phosphate catabolic process	TC05V2_G012630 TC10V2_G000220 TC10V2_G013770
0.0278243	7	20	3.00858	GO:0046777 Protein autophosphorylation	TC02V2_G012260 TC03V2_G005950 TC05V2_G009500 TC05V2_G013420 TC09V2_G019560 TC09V2_G020500 TC05V2_G024130
0.0278243	3	4	6.44695	GO:0051275 Beta-glucan catabolic process	TC05V2_G009940 TC05V2_G015690 TC08V2_G003540
0.0278243	3	4	6.44695	GO:0051453 Regulation of intracellular ph	TC05V2_G024930 TC08V2_G002980 TC10V2_G003320
0.0278243	3	4	6.44695	GO:0070189 Kynurenine metabolic process	TC02V2_G008650 TC02V2_G008660 TC02V2_G008640
0.0278243	3	4	6.44695	GO:0071450 Cellular response to oxygen radical	TC05V2_G012880 TC05V2_G020780 TC10V2_G014220
0.0278243	3	4	6.44695	GO:0071451 Cellular response to superoxide	TC05V2_G012880 TC05V2_G020780 TC10V2_G014220
0.0278243	3	4	6.44695	GO:1902222 Erythrose 4-phosphate/phosphoenolpyruvate family amino acid catabolic process	TC05V2_G005360 TC07V2_G008370 TC09V2_G028910
0.0278243	3	4	6.44695	GO:1903409 Reactive oxygen species biosynthetic process	TC02V2_G014400 TC03V2_G024000 TC09V2_G020890
0.0278243	3	4	6.44695	GO:0006559 L-phenylalanine catabolic process	TC05V2_G005360 TC07V2_G008370 TC09V2_G028910
0.0278243	3	4	6.44695	GO:0006564 L-serine biosynthetic process	TC01V2_G000590 TC02V2_G008720 TC06V2_G001410
0.0278243	3	4	6.44695	GO:0006569 Tryptophan catabolic process	TC02V2_G008650 TC02V2_G008660 TC02V2_G008640
0.0278243	3	4	6.44695	GO:0009249 Protein lipoylation	TC03V2_G019250 TC08V2_G001510 TC09V2_G018370
0.0278243	3	4	6.44695	GO:0009624 Response to nematode	TC02V2_G012210 TC10V2_G000640 TC03V2_G013390
0.0278243	3	4	6.44695	GO:0009962 Regulation of flavonoid biosynthetic process	TC06V2_G003600 TC09V2_G000520 TC09V2_G028790
0.0278243	3	4	6.44695	GO:0010043 Response to zinc ion	TC02V2_G012360 TC04V2_G000020 TC05V2_G000700
0.0278974	8	25	2.7507	GO:0006081 Cellular aldehyde metabolic process	TC05V2_G001360 TC09V2_G003770 TC02V2_G005320 TC02V2_G024220 TC05V2_G012580 TC05V2_G023800 TC06V2_G007290 TC08V2_G000590
0.0278974	8	25	2.7507	GO:0044550 Secondary metabolite biosynthetic process	TC02V2_G006710 TC05V2_G005360 TC06V2_G003600 TC09V2_G017970 TC03V2_G017820 TC03V2_G006670 TC06V2_G008120 TC10V2_G003290
0.0283579	11	41	2.30623	GO:0071214 Cellular response to abiotic stimulus	TC02V2_G016860 TC03V2_G016010 TC05V2_G020250 TC05V2_G027580 TC09V2_G022030 TC10V2_G002740 TC10V2_G003280 TC05V2_G020780 TC10V2_G000390 TC03V2_G010100 TC03V2_G024000
0.0283579	11	41	2.30623	GO:0104004 Cellular response to environmental stimulus	TC02V2_G016860 TC03V2_G016010 TC05V2_G020250 TC05V2_G027580 TC09V2_G022030 TC10V2_G002740 TC10V2_G003280 TC05V2_G020780 TC10V2_G000390 TC03V2_G010100 TC03V2_G024000
0.0340645	9	31	2.49559	GO:0062012 Regulation of small molecule metabolic process	TC05V2_G000840 TC03V2_G000670 TC06V2_G000400 TC08V2_G002950 TC02V2_G015230 TC03V2_G000200 TC05V2_G014620 TC06V2_G000370 TC09V2_G028810
0.0346062	26	136	1.64334	GO:0040007 Growth	TC07V2_G003870 TC05V2_G013990 TC02V2_G005000 TC02V2_G022210 TC02V2_G025310 TC03V2_G006930 TC03V2_G018410 TC04V2_G003860 TC05V2_G014760 TC08V2_G002950 TC08V2_G003730 TC09V2_G030040 TC10V2_G009720 TC06V2_G000390 TC10V2_G001740 TC02V2_G026220 TC03V2_G009930 TC03V2_G016600 TC04V2_G000540 TC05V2_G011200 TC05V2_G024090 TC06V2_G000370 TC09V2_G016950 TC09V2_G028790 TC09V2_G028810 TC10V2_G000390
0.0356226	8	26	2.6449	GO:0042401 Biogenic amine biosynthetic process	TC02V2_G005950 TC09V2_G025450 TC02V2_G029070 TC02V2_G027320 TC03V2_G001100 TC05V2_G026850 TC07V2_G003960 TC10V2_G001930
0.0356226	7	21	2.86531	GO:0006119 Oxidative phosphorylation	TC05V2_G017700 TC06V2_G006020 TC09V2_G012740 TC02V2_G005990 TC04V2_G005340 TC05V2_G015560 TC10V2_G014530
0.0356226	7	21	2.86531	GO:0046351 Disaccharide biosynthetic process	TC05V2_G002170 TC02V2_G021440 TC02V2_G026590 TC03V2_G000550 TC03V2_G025630 TC09V2_G001960 TC09V2_G011510
0.0356226	7	21	2.86531	GO:0071103 Dna conformation change	TC03V2_G012080 TC05V2_G004580 TC05V2_G011160 TC07V2_G002270 TC09V2_G018620 TC10V2_G003410 TC10V2_G010420
0.0356226	7	21	2.86531	GO:0072665 Protein localization to vacuole	TC02V2_G009470 TC05V2_G017880 TC02V2_G029280 TC05V2_G017790 TC09V2_G024690 TC09V2_G028730 TC03V2_G006950
0.0356226	7	21	2.86531	GO:0072666 Establishment of protein localization to vacuole	TC02V2_G009470 TC05V2_G017880 TC02V2_G029280 TC05V2_G017790 TC09V2_G024690 TC09V2_G028730 TC03V2_G006950
0.0356226	8	26	2.6449	GO:0009309 Amine biosynthetic process	TC02V2_G005950 TC09V2_G025450 TC02V2_G029070 TC02V2_G027320 TC03V2_G001100 TC05V2_G026850 TC07V2_G003960 TC10V2_G001930
0.0359411	16	72	1.91021	GO:0009658 Chloroplast organization	TC09V2_G012090 TC02V2_G005320 TC03V2_G016010 TC07V2_G003890 TC02V2_G012500 TC02V2_G028310 TC02V2_G029120 TC02V2_G029620 TC03V2_G011710 TC05V2_G016160 TC05V2_G020270 TC06V2_G006270 TC09V2_G000520 TC09V2_G021830 TC09V2_G024360 TC09V2_G030300
0.0364384	13	54	2.06939	GO:0051274 Beta-glucan biosynthetic process	TC09V2_G012890 TC02V2_G012440 TC02V2_G015220 TC03V2_G009950 TC03V2_G025950 TC05V2_G012320 TC05V2_G017740 TC07V2_G001020 TC09V2_G018150 TC09V2_G018210 TC10V2_G000390 TC05V2_G014620 TC06V2_G000370
0.0366436	14	60	2.00572	GO:0007005 Mitochondrion organization	TC02V2_G015880 TC03V2_G017970 TC03V2_G021440 TC04V2_G002470 TC05V2_G026070 TC05V2_G026480 TC09V2_G004540 TC09V2_G023300 TC05V2_G014210 TC09V2_G003980 TC09V2_G022060 TC09V2_G025930 TC05V2_G014620 TC05V2_G025680
0.0374892	10	37	2.32323	GO:0002376 Immune system process	TC05V2_G012050 TC06V2_G000400 TC08V2_G005380 TC04V2_G001370 TC09V2_G017930 TC09V2_G028270 TC02V2_G001050 TC03V2_G024000 TC05V2_G022190 TC09V2_G028810
0.0380758	18	85	1.82032	GO:0051301 Cell division	TC03V2_G025950 TC07V2_G002410 TC09V2_G012890 TC02V2_G029120 TC03V2_G016060 TC03V2_G021840 TC09V2_G000200 TC09V2_G011170 TC10V2_G009720 TC09V2_G028790 TC10V2_G006120 TC03V2_G011710 TC03V2_G013390 TC05V2_G000840 TC05V2_G018020 TC05V2_G024090 TC09V2_G003340 TC10V2_G013910
0.0382369	5	12	3.58164	GO:0031349 Positive regulation of defense response	TC05V2_G012050 TC08V2_G005380 TC04V2_G001370 TC02V2_G001050 TC03V2_G015440
0.0382369	5	12	3.58164	GO:0006613 Cotranslational protein targeting to membrane	TC06V2_G002420 TC02V2_G023670 TC03V2_G011510 TC05V2_G007860 TC09V2_G002560
0.0382369	5	12	3.58164	GO:0006614 Srp-dependent cotranslational protein targeting to membrane	TC06V2_G002420 TC02V2_G023670 TC03V2_G011510 TC05V2_G007860 TC09V2_G002560
0.0382369	5	12	3.58164	GO:0006879 Intracellular iron ion homeostasis	TC02V2_G012040 TC05V2_G000700 TC09V2_G029840 TC10V2_G000950 TC05V2_G026920
0.0398888	4	8	4.29797	GO:0009718 Anthocyanin-containing compound biosynthetic process	TC02V2_G029730 TC07V2_G008050 TC09V2_G000520 TC09V2_G028790
0.0410618	12	49	2.10513	GO:0031347 Regulation of defense response	TC05V2_G012050 TC08V2_G005380 TC09V2_G012550 TC04V2_G001370 TC09V2_G028270 TC02V2_G001050 TC02V2_G027390 TC03V2_G015440 TC03V2_G016670 TC05V2_G009180 TC05V2_G024130 TC09V2_G023200
0.0410618	12	49	2.10513	GO:0006470 Protein dephosphorylation	TC03V2_G002390 TC05V2_G015030 TC05V2_G022590 TC06V2_G003580 TC09V2_G012550 TC02V2_G015540 TC03V2_G011430 TC05V2_G016620 TC07V2_G007730 TC09V2_G027070 TC09V2_G029510 TC10V2_G001220
0.0410618	12	49	2.10513	GO:0009734 Auxin-activated signaling pathway	TC03V2_G018820 TC03V2_G018830 TC04V2_G003810 TC05V2_G023460 TC06V2_G001550 TC06V2_G007740 TC08V2_G002950 TC09V2_G013370 TC09V2_G016080 TC03V2_G010100 TC09V2_G028790 TC10V2_G001530
0.0436755	8	27	2.54694	GO:0000097 Sulfur amino acid biosynthetic process	TC03V2_G018370 TC05V2_G020100 TC02V2_G008910 TC02V2_G008950 TC05V2_G020400 TC07V2_G001500 TC09V2_G007960 TC09V2_G022120
0.0436755	8	27	2.54694	GO:0006820 Monoatomic anion transport	TC03V2_G000990 TC03V2_G013280 TC04V2_G006180 TC06V2_G006110 TC09V2_G010270 TC09V2_G012720 TC09V2_G014640 TC10V2_G009140
0.0442075	6	17	3.03386	GO:0098661 Inorganic anion transmembrane transport	TC09V2_G029190 TC01V2_G000210 TC02V2_G012250 TC03V2_G011380 TC03V2_G017710 TC04V2_G003870
0.0442075	6	17	3.03386	GO:0006730 One-carbon metabolic process	TC09V2_G028970 TC02V2_G007260 TC03V2_G009830 TC05V2_G005860 TC05V2_G027320 TC09V2_G004480
0.0448333	19	93	1.75616	GO:0009966 Regulation of signal transduction	TC10V2_G010520 TC02V2_G029270 TC03V2_G016600 TC03V2_G024620 TC04V2_G007410 TC05V2_G000840 TC06V2_G000400 TC08V2_G002950 TC09V2_G005920 TC09V2_G006390 TC09V2_G016080 TC09V2_G029720 TC10V2_G003040 TC02V2_G001050 TC02V2_G027390 TC03V2_G009930 TC05V2_G024130 TC08V2_G000770 TC10V2_G001530
0.0449115	7	22	2.73507	GO:0071395 Cellular response to jasmonic acid stimulus	TC05V2_G012050 TC02V2_G004620 TC02V2_G007010 TC08V2_G005380 TC04V2_G001370 TC07V2_G008050 TC03V2_G016670
0.0449115	7	22	2.73507	GO:0071398 Cellular response to fatty acid	TC05V2_G012050 TC02V2_G004620 TC02V2_G007010 TC08V2_G005380 TC04V2_G001370 TC07V2_G008050 TC03V2_G016670
0.0449115	7	22	2.73507	GO:1902221 Erythrose 4-phosphate/phosphoenolpyruvate family amino acid metabolic process	TC09V2_G024320 TC05V2_G005360 TC07V2_G003960 TC07V2_G008370 TC08V2_G002950 TC09V2_G021830 TC09V2_G028910
0.0461521	22	113	1.67354	GO:0022622 Root system development	TC02V2_G002160 TC02V2_G005320 TC02V2_G007010 TC02V2_G010130 TC02V2_G025310 TC03V2_G018410 TC05V2_G014760 TC08V2_G001820 TC09V2_G003980 TC09V2_G028220 TC10V2_G009720 TC03V2_G009930 TC03V2_G018820 TC05V2_G000840 TC06V2_G000370 TC09V2_G007800 TC09V2_G014390 TC09V2_G028790 TC09V2_G028810 TC10V2_G000390 TC10V2_G006120 TC10V2_G013910
0.0461521	22	113	1.67354	GO:0048364 Root development	TC02V2_G002160 TC02V2_G005320 TC02V2_G007010 TC02V2_G010130 TC02V2_G025310 TC03V2_G018410 TC05V2_G014760 TC08V2_G001820 TC09V2_G003980 TC09V2_G028220 TC10V2_G009720 TC03V2_G009930 TC03V2_G018820 TC05V2_G000840 TC06V2_G000370 TC09V2_G007800 TC09V2_G014390 TC09V2_G028790 TC09V2_G028810 TC10V2_G000390 TC10V2_G006120 TC10V2_G013910
0.0461521	11	44	2.14898	GO:0000272 Polysaccharide catabolic process	TC04V2_G007360 TC02V2_G003850 TC02V2_G013840 TC02V2_G023260 TC03V2_G019720 TC04V2_G002060 TC05V2_G009940 TC05V2_G015690 TC05V2_G017400 TC08V2_G003540 TC02V2_G022320
0.0471758	12	50	2.06302	GO:0071365 Cellular response to auxin stimulus	TC03V2_G018820 TC03V2_G018830 TC04V2_G003810 TC05V2_G023460 TC06V2_G001550 TC06V2_G007740 TC08V2_G002950 TC09V2_G013370 TC09V2_G016080 TC03V2_G010100 TC09V2_G028790 TC10V2_G001530
0.048629	9	33	2.34435	GO:0016197 Endosomal transport	TC03V2_G006410 TC09V2_G023870 TC10V2_G006980 TC03V2_G006380 TC03V2_G019630 TC05V2_G017790 TC06V2_G000230 TC08V2_G003990 TC09V2_G009960
0.048629	383	2966	1.10999	GO:0044249 Cellular biosynthetic process	TC01V2_G000330 TC02V2_G005260 TC02V2_G007730 TC02V2_G012420 TC02V2_G012560 TC02V2_G017320 TC02V2_G017650 TC02V2_G022230 TC02V2_G028780 TC02V2_G029140 TC03V2_G000670 TC03V2_G000780 TC03V2_G001460 TC03V2_G003520 TC03V2_G011650 TC03V2_G013370 TC03V2_G018370 TC03V2_G019250 TC03V2_G021460 TC03V2_G023820 TC04V2_G002480 TC04V2_G002990 TC04V2_G003520 TC04V2_G004110 TC04V2_G007870 TC04V2_G008760 TC05V2_G0…
0.048629	9	33	2.34435	GO:0045087 Innate immune response	TC05V2_G012050 TC06V2_G000400 TC08V2_G005380 TC04V2_G001370 TC09V2_G017930 TC09V2_G028270 TC02V2_G001050 TC05V2_G022190 TC09V2_G028810
0.048924	19	94	1.73748	GO:0010646 Regulation of cell communication	TC10V2_G010520 TC02V2_G029270 TC03V2_G016600 TC03V2_G024620 TC04V2_G007410 TC05V2_G000840 TC06V2_G000400 TC08V2_G002950 TC09V2_G005920 TC09V2_G006390 TC09V2_G016080 TC09V2_G029720 TC10V2_G003040 TC02V2_G001050 TC02V2_G027390 TC03V2_G009930 TC05V2_G024130 TC08V2_G000770 TC10V2_G001530
0.048924	19	94	1.73748	GO:0023051 Regulation of signaling	TC10V2_G010520 TC02V2_G029270 TC03V2_G016600 TC03V2_G024620 TC04V2_G007410 TC05V2_G000840 TC06V2_G000400 TC08V2_G002950 TC09V2_G005920 TC09V2_G006390 TC09V2_G016080 TC09V2_G029720 TC10V2_G003040 TC02V2_G001050 TC02V2_G027390 TC03V2_G009930 TC05V2_G024130 TC08V2_G000770 TC10V2_G001530
0.0519733	10	39	2.20409	GO:0141124 Intracellular signaling cassette	TC02V2_G010690 TC02V2_G029270 TC03V2_G000430 TC03V2_G016470 TC03V2_G019820 TC04V2_G007410 TC08V2_G002650 TC09V2_G005920 TC09V2_G028220 TC02V2_G015230
0.0533602	5	13	3.30613	GO:0006022 Aminoglycan metabolic process	TC02V2_G028780 TC04V2_G007870 TC01V2_G000700 TC02V2_G003850 TC06V2_G000370
0.0533602	5	13	3.30613	GO:0042147 Retrograde transport endosome to golgi	TC03V2_G006410 TC03V2_G006380 TC03V2_G019630 TC06V2_G000230 TC08V2_G003990
0.0542576	12	51	2.02257	GO:0048584 Positive regulation of response to stimulus	TC05V2_G012050 TC03V2_G005950 TC03V2_G024620 TC05V2_G024520 TC08V2_G005380 TC10V2_G003040 TC04V2_G001370 TC02V2_G001050 TC03V2_G015440 TC03V2_G016600 TC09V2_G008890 TC09V2_G028320
0.0564171	3	5	5.15756	GO:0046352 Disaccharide catabolic process	TC02V2_G005360 TC08V2_G003680 TC09V2_G024110
0.0564171	3	5	5.15756	GO:0046417 Chorismate metabolic process	TC02V2_G029070 TC03V2_G019880 TC04V2_G007560
0.0564171	7	23	2.61615	GO:0072329 Monocarboxylic acid catabolic process	TC02V2_G027440 TC03V2_G020600 TC04V2_G000680 TC05V2_G025290 TC08V2_G000590 TC03V2_G009930 TC06V2_G007710
0.0564171	3	5	5.15756	GO:0170044 Non-proteinogenic amino acid catabolic process	TC03V2_G006780 TC02V2_G027910 TC03V2_G009830
0.0564171	3	5	5.15756	GO:0009313 Oligosaccharide catabolic process	TC02V2_G005360 TC08V2_G003680 TC09V2_G024110
0.0564171	3	5	5.15756	GO:0009768 Photosynthesis light harvesting in photosystem i	TC02V2_G017710 TC05V2_G001500 TC10V2_G005860
0.0566237	6	18	2.86531	GO:0019646 Aerobic electron transport chain	TC05V2_G017700 TC06V2_G006020 TC09V2_G012740 TC02V2_G005990 TC05V2_G015560 TC10V2_G014530
0.0566237	6	18	2.86531	GO:0042775 Mitochondrial atp synthesis coupled electron transport	TC05V2_G017700 TC06V2_G006020 TC09V2_G012740 TC02V2_G005990 TC05V2_G015560 TC10V2_G014530
0.0566237	6	18	2.86531	GO:0009084 Glutamine family amino acid biosynthetic process	TC05V2_G011950 TC03V2_G004620 TC03V2_G016250 TC04V2_G004560 TC05V2_G011590 TC10V2_G002870
0.0573326	15	70	1.84199	GO:0016311 Dephosphorylation	TC03V2_G002390 TC05V2_G015030 TC05V2_G015040 TC05V2_G022590 TC06V2_G003580 TC09V2_G012550 TC10V2_G007970 TC02V2_G015540 TC03V2_G011430 TC05V2_G000150 TC05V2_G016620 TC07V2_G007730 TC09V2_G027070 TC09V2_G029510 TC10V2_G001220
0.0573326	15	70	1.84199	GO:0048366 Leaf development	TC02V2_G003860 TC02V2_G016860 TC05V2_G003430 TC06V2_G001550 TC07V2_G007470 TC10V2_G000640 TC05V2_G000700 TC02V2_G011910 TC03V2_G006670 TC03V2_G009930 TC04V2_G005100 TC09V2_G010150 TC09V2_G017930 TC09V2_G028790 TC10V2_G001530
0.0599648	4	9	3.82042	GO:0010207 Photosystem ii assembly	TC02V2_G014400 TC03V2_G016010 TC02V2_G003710 TC05V2_G020270
0.0599648	4	9	3.82042	GO:0034614 Cellular response to reactive oxygen species	TC05V2_G012880 TC05V2_G020780 TC10V2_G014220 TC02V2_G029620
0.0599648	4	9	3.82042	GO:2000377 Regulation of reactive oxygen species metabolic process	TC05V2_G020100 TC06V2_G000400 TC02V2_G014400 TC05V2_G025680
0.0599648	4	9	3.82042	GO:0006826 Iron ion transport	TC05V2_G000700 TC05V2_G026920 TC09V2_G029840 TC10V2_G000950
0.0608856	11	46	2.05555	GO:0043038 Amino acid activation	TC03V2_G011650 TC02V2_G013680 TC02V2_G016290 TC02V2_G018800 TC03V2_G015170 TC04V2_G004800 TC05V2_G000270 TC09V2_G000070 TC09V2_G004140 TC09V2_G008230 TC09V2_G014030
0.0608856	11	46	2.05555	GO:0043039 Trna aminoacylation	TC03V2_G011650 TC02V2_G013680 TC02V2_G016290 TC02V2_G018800 TC03V2_G015170 TC04V2_G004800 TC05V2_G000270 TC09V2_G000070 TC09V2_G004140 TC09V2_G008230 TC09V2_G014030
0.0608856	11	46	2.05555	GO:0006418 Trna aminoacylation for protein translation	TC03V2_G011650 TC02V2_G013680 TC02V2_G016290 TC02V2_G018800 TC03V2_G015170 TC04V2_G004800 TC05V2_G000270 TC09V2_G000070 TC09V2_G004140 TC09V2_G008230 TC09V2_G014030
0.0611523	16	77	1.78617	GO:0009308 Amine metabolic process	TC02V2_G005950 TC02V2_G008650 TC02V2_G008660 TC09V2_G025450 TC02V2_G029070 TC02V2_G008640 TC02V2_G027320 TC03V2_G001100 TC03V2_G016140 TC05V2_G026850 TC06V2_G000400 TC07V2_G003960 TC08V2_G002820 TC08V2_G002950 TC10V2_G001930 TC05V2_G014620
0.0630656	27	151	1.53702	GO:0048869 Cellular developmental process	TC03V2_G024660 TC09V2_G005490 TC05V2_G013990 TC02V2_G005000 TC02V2_G010130 TC02V2_G017320 TC02V2_G025310 TC03V2_G009260 TC03V2_G012860 TC03V2_G018410 TC05V2_G014760 TC08V2_G001820 TC08V2_G004490 TC02V2_G004760 TC02V2_G026220 TC03V2_G016270 TC03V2_G017390 TC03V2_G018820 TC04V2_G000540 TC05V2_G011200 TC05V2_G015990 TC06V2_G000370 TC09V2_G016950 TC09V2_G018620 TC09V2_G028750 TC10V2_G000390 TC10V2_G0…
0.0642768	19	97	1.68374	GO:0048827 Phyllome development	TC04V2_G003520 TC02V2_G003860 TC02V2_G016860 TC02V2_G017320 TC02V2_G022210 TC05V2_G003430 TC06V2_G001550 TC07V2_G007470 TC10V2_G000640 TC05V2_G000700 TC02V2_G011910 TC03V2_G006670 TC03V2_G009930 TC04V2_G004800 TC04V2_G005100 TC09V2_G010150 TC09V2_G017930 TC09V2_G028790 TC10V2_G001530
0.0677497	9	35	2.21038	GO:0009751 Response to salicylic acid	TC02V2_G016860 TC06V2_G000400 TC09V2_G006800 TC02V2_G027390 TC05V2_G023780 TC02V2_G001050 TC02V2_G011910 TC05V2_G024130 TC07V2_G001120
0.0683746	7	24	2.50715	GO:0016226 Iron-sulfur cluster assembly	TC03V2_G019210 TC02V2_G014080 TC05V2_G007570 TC05V2_G007650 TC06V2_G007110 TC09V2_G009250 TC09V2_G020900
0.0683746	7	24	2.50715	GO:0031163 Metallo-sulfur cluster assembly	TC03V2_G019210 TC02V2_G014080 TC05V2_G007570 TC05V2_G007650 TC06V2_G007110 TC09V2_G009250 TC09V2_G020900
0.0683746	7	24	2.50715	GO:0009312 Oligosaccharide biosynthetic process	TC05V2_G002170 TC02V2_G021440 TC02V2_G026590 TC03V2_G000550 TC03V2_G025630 TC09V2_G001960 TC09V2_G011510
0.069621	10	41	2.09657	GO:0009741 Response to brassinosteroid	TC08V2_G004850 TC10V2_G000030 TC02V2_G003750 TC05V2_G002230 TC07V2_G009860 TC08V2_G003660 TC09V2_G025940 TC06V2_G000390 TC03V2_G009930 TC09V2_G018620
0.0702094	5	14	3.06998	GO:0016482 Cytosolic transport	TC03V2_G006410 TC03V2_G006380 TC03V2_G019630 TC06V2_G000230 TC08V2_G003990
0.0702094	5	14	3.06998	GO:0042435 Indole-containing compound biosynthetic process	TC09V2_G025450 TC02V2_G029070 TC03V2_G001100 TC07V2_G003960 TC10V2_G001930
0.0702094	5	14	3.06998	GO:0042537 Benzene-containing compound metabolic process	TC02V2_G008650 TC02V2_G008660 TC02V2_G008640 TC05V2_G005360 TC06V2_G000370
0.0702094	5	14	3.06998	GO:0046470 Phosphatidylcholine metabolic process	TC02V2_G007360 TC03V2_G022420 TC08V2_G004380 TC09V2_G002220 TC09V2_G002230
0.0702094	5	14	3.06998	GO:0080147 Root hair cell development	TC02V2_G010130 TC02V2_G025310 TC03V2_G018410 TC05V2_G014760 TC08V2_G001820
0.0702094	5	14	3.06998	GO:0120255 Olefinic compound biosynthetic process	TC10V2_G000510 TC05V2_G000840 TC05V2_G005360 TC03V2_G006780 TC09V2_G028810
0.0703911	15	72	1.79082	GO:0006721 Terpenoid metabolic process	TC06V2_G006570 TC10V2_G000510 TC08V2_G000770 TC03V2_G023890 TC05V2_G021650 TC06V2_G002950 TC06V2_G004110 TC06V2_G004180 TC08V2_G001220 TC09V2_G014050 TC09V2_G017770 TC09V2_G020850 TC09V2_G028620 TC03V2_G009930 TC09V2_G000520
0.0710423	6	19	2.71451	GO:0010053 Root epidermal cell differentiation	TC02V2_G010130 TC02V2_G025310 TC03V2_G018410 TC05V2_G014760 TC08V2_G001820 TC06V2_G000370
0.0769816	30	175	1.47359	GO:0019941 Modification-dependent protein catabolic process	TC02V2_G004620 TC02V2_G004720 TC02V2_G009470 TC02V2_G015700 TC02V2_G022140 TC03V2_G010070 TC03V2_G017080 TC03V2_G022360 TC03V2_G026090 TC04V2_G003810 TC05V2_G001750 TC05V2_G008050 TC05V2_G020300 TC05V2_G026020 TC07V2_G004500 TC07V2_G004520 TC09V2_G018740 TC09V2_G022040 TC10V2_G009270 TC02V2_G000290 TC02V2_G004760 TC02V2_G004810 TC05V2_G002540 TC05V2_G017790 TC08V2_G002400 TC09V2_G006590 TC10V2_G0…
0.0769816	30	175	1.47359	GO:0043632 Modification-dependent macromolecule catabolic process	TC02V2_G004620 TC02V2_G004720 TC02V2_G009470 TC02V2_G015700 TC02V2_G022140 TC03V2_G010070 TC03V2_G017080 TC03V2_G022360 TC03V2_G026090 TC04V2_G003810 TC05V2_G001750 TC05V2_G008050 TC05V2_G020300 TC05V2_G026020 TC07V2_G004500 TC07V2_G004520 TC09V2_G018740 TC09V2_G022040 TC10V2_G009270 TC02V2_G000290 TC02V2_G004760 TC02V2_G004810 TC05V2_G002540 TC05V2_G017790 TC08V2_G002400 TC09V2_G006590 TC10V2_G0…
0.0783895	42	262	1.37797	GO:0048608 Reproductive structure development	TC03V2_G022000 TC04V2_G003520 TC09V2_G023800 TC02V2_G003860 TC02V2_G007010 TC02V2_G007730 TC02V2_G012230 TC02V2_G016860 TC02V2_G017320 TC02V2_G022210 TC05V2_G009810 TC07V2_G003970 TC07V2_G004620 TC09V2_G000990 TC09V2_G010350 TC09V2_G011170 TC09V2_G024420 TC09V2_G030040 TC10V2_G009720 TC05V2_G000700 TC02V2_G009940 TC02V2_G014080 TC02V2_G029620 TC03V2_G006130 TC03V2_G006670 TC03V2_G009930 TC03V2_G0…
0.0783895	42	262	1.37797	GO:0061458 Reproductive system development	TC03V2_G022000 TC04V2_G003520 TC09V2_G023800 TC02V2_G003860 TC02V2_G007010 TC02V2_G007730 TC02V2_G012230 TC02V2_G016860 TC02V2_G017320 TC02V2_G022210 TC05V2_G009810 TC07V2_G003970 TC07V2_G004620 TC09V2_G000990 TC09V2_G010350 TC09V2_G011170 TC09V2_G024420 TC09V2_G030040 TC10V2_G009720 TC05V2_G000700 TC02V2_G009940 TC02V2_G014080 TC02V2_G029620 TC03V2_G006130 TC03V2_G006670 TC03V2_G009930 TC03V2_G0…
0.0783895	9	36	2.14898	GO:0006955 Immune response	TC05V2_G012050 TC06V2_G000400 TC08V2_G005380 TC04V2_G001370 TC09V2_G017930 TC09V2_G028270 TC02V2_G001050 TC05V2_G022190 TC09V2_G028810
0.0783895	9	36	2.14898	GO:0009627 Systemic acquired resistance	TC02V2_G011910 TC03V2_G015440 TC05V2_G023440 TC06V2_G000400 TC09V2_G013760 TC02V2_G027390 TC03V2_G002170 TC03V2_G009930 TC05V2_G022190
0.0793554	11	48	1.9699	GO:0042180 Cellular ketone metabolic process	TC02V2_G008650 TC02V2_G008660 TC09V2_G003770 TC02V2_G008640 TC06V2_G000400 TC08V2_G000560 TC08V2_G002950 TC02V2_G015230 TC03V2_G000200 TC05V2_G014620 TC06V2_G000370
0.0795339	10	42	2.04665	GO:0006302 Double-strand break repair	TC02V2_G009220 TC04V2_G004340 TC05V2_G004580 TC09V2_G014720 TC03V2_G012760 TC07V2_G009920 TC02V2_G021150 TC03V2_G019860 TC07V2_G001360 TC09V2_G015780
0.083353	19	100	1.63323	GO:0006720 Isoprenoid metabolic process	TC02V2_G012420 TC06V2_G006570 TC10V2_G000510 TC08V2_G000770 TC01V2_G000160 TC03V2_G023890 TC05V2_G016190 TC05V2_G021650 TC06V2_G002950 TC06V2_G004110 TC06V2_G004180 TC06V2_G005360 TC08V2_G001220 TC09V2_G014050 TC09V2_G017770 TC09V2_G020850 TC09V2_G028620 TC03V2_G009930 TC09V2_G000520
0.0855347	4	10	3.43837	GO:0007186 G protein-coupled receptor signaling pathway	TC02V2_G007010 TC03V2_G026080 TC09V2_G005680 TC02V2_G014400
0.0855347	4	10	3.43837	GO:0009644 Response to high light intensity	TC10V2_G005860 TC03V2_G012590 TC05V2_G020780 TC05V2_G016160
0.0882445	12	55	1.87548	GO:0044706 Multi-multicellular organism process	TC05V2_G024100 TC05V2_G013990 TC02V2_G005000 TC05V2_G014760 TC02V2_G012440 TC02V2_G026220 TC04V2_G000540 TC05V2_G011200 TC05V2_G015990 TC05V2_G025680 TC09V2_G008590 TC09V2_G029260
0.0882445	12	55	1.87548	GO:0009856 Pollination	TC05V2_G024100 TC05V2_G013990 TC02V2_G005000 TC05V2_G014760 TC02V2_G012440 TC02V2_G026220 TC04V2_G000540 TC05V2_G011200 TC05V2_G015990 TC05V2_G025680 TC09V2_G008590 TC09V2_G029260
0.0888247	25	142	1.51337	GO:0030154 Cell differentiation	TC03V2_G024660 TC09V2_G005490 TC05V2_G013990 TC02V2_G005000 TC02V2_G010130 TC02V2_G017320 TC02V2_G025310 TC03V2_G009260 TC03V2_G012860 TC03V2_G018410 TC05V2_G014760 TC08V2_G001820 TC08V2_G004490 TC02V2_G004760 TC02V2_G026220 TC03V2_G016270 TC03V2_G017390 TC04V2_G000540 TC05V2_G011200 TC05V2_G015990 TC06V2_G000370 TC09V2_G016950 TC09V2_G018620 TC09V2_G028750 TC10V2_G000390
0.0890603	6	20	2.57878	GO:0009867 Jasmonic acid mediated signaling pathway	TC05V2_G012050 TC02V2_G004620 TC02V2_G007010 TC08V2_G005380 TC04V2_G001370 TC03V2_G016670
0.0898314	3	6	4.29797	GO:0017006 Protein-tetrapyrrole linkage	TC03V2_G011710 TC05V2_G000910 TC05V2_G027580
0.0898314	3	6	4.29797	GO:0019432 Triglyceride biosynthetic process	TC06V2_G001500 TC09V2_G007440 TC10V2_G007450
0.0898314	3	6	4.29797	GO:0019682 Glyceraldehyde-3-phosphate metabolic process	TC02V2_G005320 TC02V2_G024220 TC05V2_G023800
0.0898314	3	6	4.29797	GO:0032011 Arf protein signal transduction	TC02V2_G029270 TC04V2_G007410 TC09V2_G005920
0.0898314	3	6	4.29797	GO:0032012 Regulation of arf protein signal transduction	TC02V2_G029270 TC04V2_G007410 TC09V2_G005920
0.0898314	3	6	4.29797	GO:0033238 Regulation of amine metabolic process	TC06V2_G000400 TC08V2_G002950 TC05V2_G014620
0.0898314	3	6	4.29797	GO:0006072 Glycerol-3-phosphate metabolic process	TC10V2_G000220 TC05V2_G012630 TC10V2_G013770
0.0898314	3	6	4.29797	GO:0042793 Plastid transcription	TC09V2_G012090 TC02V2_G028310 TC03V2_G000050
0.0898314	3	6	4.29797	GO:0043449 Cellular alkene metabolic process	TC05V2_G000840 TC03V2_G006780 TC09V2_G028810
0.0898314	3	6	4.29797	GO:0043450 Alkene biosynthetic process	TC05V2_G000840 TC03V2_G006780 TC09V2_G028810
0.0898314	3	6	4.29797	GO:0046184 Aldehyde biosynthetic process	TC05V2_G001360 TC02V2_G005320 TC06V2_G007290
0.0898314	3	6	4.29797	GO:0046460 Neutral lipid biosynthetic process	TC06V2_G001500 TC09V2_G007440 TC10V2_G007450
0.0898314	3	6	4.29797	GO:0046463 Acylglycerol biosynthetic process	TC06V2_G001500 TC09V2_G007440 TC10V2_G007450
0.0898314	3	6	4.29797	GO:0046500 S-adenosylmethionine metabolic process	TC03V2_G009830 TC05V2_G005860 TC05V2_G027320
0.0898314	3	6	4.29797	GO:0052646 Alditol phosphate metabolic process	TC10V2_G000220 TC05V2_G012630 TC10V2_G013770
0.0898314	3	6	4.29797	GO:0070534 Protein k63-linked ubiquitination	TC02V2_G023010 TC03V2_G009610 TC04V2_G001830
0.0898314	3	6	4.29797	GO:0097502 Mannosylation	TC03V2_G025950 TC09V2_G024420 TC10V2_G002010
0.0898314	3	6	4.29797	GO:1900673 Olefin metabolic process	TC05V2_G000840 TC03V2_G006780 TC09V2_G028810
0.0898314	3	6	4.29797	GO:1900674 Olefin biosynthetic process	TC05V2_G000840 TC03V2_G006780 TC09V2_G028810
0.0898314	3	6	4.29797	GO:1901475 Pyruvate transmembrane transport	TC03V2_G010300 TC04V2_G002660 TC07V2_G002460
0.0898314	3	6	4.29797	GO:0006521 Regulation of cellular amino acid metabolic process	TC06V2_G000400 TC08V2_G002950 TC05V2_G014620
0.0898314	3	6	4.29797	GO:0006848 Pyruvate transport	TC03V2_G010300 TC04V2_G002660 TC07V2_G002460
0.0898314	3	6	4.29797	GO:0006850 Mitochondrial pyruvate transmembrane transport	TC03V2_G010300 TC04V2_G002660 TC07V2_G002460
0.0898314	3	6	4.29797	GO:0009051 Pentose-phosphate shunt oxidative branch	TC02V2_G017100 TC02V2_G027440 TC04V2_G002430
0.0898314	3	6	4.29797	GO:0009692 Ethylene metabolic process	TC05V2_G000840 TC03V2_G006780 TC09V2_G028810
0.0898314	3	6	4.29797	GO:0009693 Ethylene biosynthetic process	TC05V2_G000840 TC03V2_G006780 TC09V2_G028810
0.0898314	3	6	4.29797	GO:0001666 Response to hypoxia	TC10V2_G010520 TC06V2_G000400 TC09V2_G016080
0.0952367	12	56	1.84199	GO:0015711 Organic anion transport	TC07V2_G003690 TC02V2_G011030 TC02V2_G015460 TC03V2_G008760 TC03V2_G010300 TC04V2_G002660 TC05V2_G004370 TC07V2_G002460 TC07V2_G003970 TC09V2_G017330 TC09V2_G019100 TC04V2_G007160
0.10075	8	32	2.14898	GO:0009845 Seed germination	TC02V2_G007010 TC02V2_G017320 TC09V2_G011170 TC05V2_G015450 TC02V2_G015230 TC03V2_G016600 TC05V2_G014620 TC08V2_G000590
0.101023	10	44	1.95362	GO:0033013 Tetrapyrrole metabolic process	TC02V2_G013420 TC03V2_G011130 TC05V2_G011210 TC07V2_G008920 TC09V2_G004510 TC09V2_G010870 TC10V2_G013620 TC02V2_G014400 TC05V2_G012880 TC09V2_G000520
0.101651	9	38	2.03588	GO:0090351 Seedling development	TC02V2_G007010 TC02V2_G017320 TC09V2_G011170 TC05V2_G015450 TC02V2_G015230 TC03V2_G016600 TC05V2_G004490 TC05V2_G014620 TC08V2_G000590
0.101651	9	38	2.03588	GO:0007389 Pattern specification process	TC09V2_G028790 TC10V2_G006120 TC02V2_G017320 TC03V2_G006670 TC03V2_G018820 TC05V2_G018020 TC09V2_G003340 TC09V2_G018620 TC09V2_G028750
0.105567	6	21	2.45598	GO:0044743 Protein transmembrane import into intracellular organelle	TC02V2_G012930 TC02V2_G014400 TC02V2_G004110 TC05V2_G022540 TC02V2_G011480 TC06V2_G007710
0.105567	6	21	2.45598	GO:0070588 Calcium ion transmembrane transport	TC07V2_G008420 TC05V2_G023620 TC05V2_G023630 TC05V2_G023660 TC08V2_G005380 TC09V2_G016070
0.105567	6	21	2.45598	GO:0010119 Regulation of stomatal movement	TC10V2_G009140 TC03V2_G009310 TC02V2_G014400 TC02V2_G015230 TC03V2_G024000 TC05V2_G009180
0.111909	5	16	2.68623	GO:0018205 Peptidyl-lysine modification	TC03V2_G019250 TC09V2_G012090 TC08V2_G001510 TC09V2_G018370 TC10V2_G000290
0.111909	4	11	3.12579	GO:0019344 Cysteine biosynthetic process	TC03V2_G018370 TC05V2_G020100 TC07V2_G001500 TC09V2_G007960
0.111909	4	11	3.12579	GO:0043650 Dicarboxylic acid biosynthetic process	TC02V2_G029070 TC03V2_G016250 TC03V2_G019880 TC05V2_G011590
0.111909	5	16	2.68623	GO:0048469 Cell maturation	TC02V2_G010130 TC02V2_G025310 TC03V2_G018410 TC05V2_G014760 TC08V2_G001820
0.111909	5	16	2.68623	GO:0048764 Trichoblast maturation	TC02V2_G010130 TC02V2_G025310 TC03V2_G018410 TC05V2_G014760 TC08V2_G001820
0.111909	5	16	2.68623	GO:0048765 Root hair cell differentiation	TC02V2_G010130 TC02V2_G025310 TC03V2_G018410 TC05V2_G014760 TC08V2_G001820
0.111909	5	16	2.68623	GO:0065002 Intracellular protein transmembrane transport	TC03V2_G010680 TC04V2_G003190 TC06V2_G002420 TC05V2_G022540 TC06V2_G007710
0.111909	5	16	2.68623	GO:0072596 Establishment of protein localization to chloroplast	TC02V2_G014400 TC09V2_G024360 TC02V2_G004110 TC02V2_G027730 TC09V2_G030300
0.111909	4	11	3.12579	GO:0006544 Glycine metabolic process	TC03V2_G019250 TC02V2_G007260 TC09V2_G004480 TC09V2_G004690
0.111909	5	16	2.68623	GO:0006906 Vesicle fusion	TC03V2_G019750 TC03V2_G025730 TC04V2_G007400 TC05V2_G021640 TC02V2_G029280
0.112808	7	27	2.22858	GO:0009642 Response to light intensity	TC05V2_G020100 TC10V2_G005860 TC03V2_G012590 TC05V2_G020780 TC08V2_G000590 TC03V2_G020960 TC05V2_G016160
0.115775	9	39	1.98368	GO:0006778 Porphyrin-containing compound metabolic process	TC03V2_G011130 TC05V2_G011210 TC07V2_G008920 TC09V2_G004510 TC09V2_G010870 TC10V2_G013620 TC02V2_G014400 TC05V2_G012880 TC09V2_G000520
0.117536	14	71	1.69497	GO:2000026 Regulation of multicellular organismal development	TC09V2_G023800 TC02V2_G012560 TC05V2_G009810 TC07V2_G004620 TC09V2_G000990 TC09V2_G003980 TC09V2_G011170 TC09V2_G017520 TC09V2_G030040 TC05V2_G015450 TC03V2_G006130 TC03V2_G009930 TC03V2_G016600 TC05V2_G000840
0.118169	18	98	1.57885	GO:0000271 Polysaccharide biosynthetic process	TC02V2_G017650 TC09V2_G012890 TC02V2_G006660 TC02V2_G012440 TC02V2_G015220 TC03V2_G009950 TC03V2_G025950 TC05V2_G012320 TC05V2_G017740 TC07V2_G001020 TC08V2_G002470 TC09V2_G018150 TC09V2_G018210 TC10V2_G000390 TC03V2_G016580 TC05V2_G012880 TC05V2_G014620 TC06V2_G000370
0.123682	2	3	5.73062	GO:0010268 Brassinosteroid homeostasis	TC09V2_G010320 TC05V2_G001930
0.123682	2	3	5.73062	GO:0010310 Regulation of hydrogen peroxide metabolic process	TC05V2_G020100 TC06V2_G000400
0.123682	6	22	2.34435	GO:0010565 Regulation of cellular ketone metabolic process	TC06V2_G000400 TC08V2_G002950 TC02V2_G015230 TC03V2_G000200 TC05V2_G014620 TC06V2_G000370
0.123682	2	3	5.73062	GO:0010587 Mirna catabolic process	TC05V2_G024090 TC08V2_G003520
0.123682	2	3	5.73062	GO:0019400 Alditol metabolic process	TC03V2_G005020 TC02V2_G005320
0.123682	2	3	5.73062	GO:0019405 Alditol catabolic process	TC03V2_G005020 TC02V2_G005320
0.123682	2	3	5.73062	GO:0019563 Glycerol catabolic process	TC03V2_G005020 TC02V2_G005320
0.123682	2	3	5.73062	GO:0019740 Nitrogen utilization	TC02V2_G011030 TC03V2_G016600
0.123682	2	3	5.73062	GO:0019755 One-carbon compound transport	TC03V2_G012860 TC03V2_G027230
0.123682	2	3	5.73062	GO:0032008 Positive regulation of tor signaling	TC03V2_G024620 TC03V2_G016600
0.123682	6	22	2.34435	GO:0006006 Glucose metabolic process	TC02V2_G017100 TC04V2_G002430 TC04V2_G004480 TC05V2_G002170 TC07V2_G002620 TC08V2_G005410
0.123682	2	3	5.73062	GO:0032264 Imp salvage	TC02V2_G020430 TC05V2_G001120
0.123682	2	3	5.73062	GO:0033319 Udp-d-xylose metabolic process	TC05V2_G004160 TC10V2_G003800
0.123682	2	3	5.73062	GO:0033320 Udp-d-xylose biosynthetic process	TC05V2_G004160 TC10V2_G003800
0.123682	2	3	5.73062	GO:0033356 Udp-l-arabinose metabolic process	TC04V2_G008660 TC02V2_G028210
0.123682	2	3	5.73062	GO:0034502 Protein localization to chromosome	TC03V2_G009930 TC04V2_G007910
0.123682	2	3	5.73062	GO:0006071 Glycerol metabolic process	TC03V2_G005020 TC02V2_G005320
0.123682	2	3	5.73062	GO:0043069 Negative regulation of programmed cell death	TC10V2_G010520 TC03V2_G024000
0.123682	596	4814	1.06422	GO:0043170 Macromolecule metabolic process	TC01V2_G000330 TC02V2_G003370 TC02V2_G004620 TC02V2_G004720 TC02V2_G004810 TC02V2_G005260 TC02V2_G007730 TC02V2_G009220 TC02V2_G009260 TC02V2_G009470 TC02V2_G010090 TC02V2_G012260 TC02V2_G012560 TC02V2_G015700 TC02V2_G017320 TC02V2_G017650 TC02V2_G018290 TC02V2_G022140 TC02V2_G022210 TC02V2_G022230 TC02V2_G023390 TC02V2_G028780 TC02V2_G029140 TC03V2_G000780 TC03V2_G001460 TC03V2_G002390 TC03V2_G0…
0.123682	16	85	1.61806	GO:0044036 Cell wall macromolecule metabolic process	TC02V2_G017650 TC01V2_G000700 TC02V2_G003850 TC04V2_G004470 TC06V2_G000370 TC09V2_G014310 TC09V2_G014350 TC09V2_G014360 TC09V2_G014370 TC09V2_G014390 TC09V2_G014400 TC09V2_G014430 TC09V2_G014450 TC09V2_G021950 TC10V2_G002010 TC10V2_G000390
0.123682	2	3	5.73062	GO:0045901 Positive regulation of translational elongation	TC02V2_G029140 TC03V2_G007830
0.123682	2	3	5.73062	GO:0045905 Positive regulation of translational termination	TC02V2_G029140 TC03V2_G007830
0.123682	2	3	5.73062	GO:0046398 Udp-glucuronate metabolic process	TC02V2_G028780 TC04V2_G007870
0.123682	2	3	5.73062	GO:0046416 D-amino acid metabolic process	TC03V2_G006780 TC02V2_G027910
0.123682	10	46	1.86868	GO:0046903 Secretion	TC03V2_G021840 TC05V2_G021640 TC10V2_G009720 TC05V2_G009180 TC03V2_G010530 TC03V2_G018410 TC08V2_G003930 TC09V2_G001960 TC10V2_G004920 TC09V2_G011510
0.123682	2	3	5.73062	GO:0048359 Mucilage metabolic process involved in seed coat development	TC09V2_G024420 TC10V2_G009720
0.123682	10	46	1.86868	GO:0048468 Cell development	TC05V2_G013990 TC02V2_G005000 TC02V2_G010130 TC02V2_G025310 TC03V2_G018410 TC05V2_G014760 TC08V2_G001820 TC02V2_G026220 TC04V2_G000540 TC05V2_G011200
0.123682	7	28	2.14898	GO:0048528 Post-embryonic root development	TC02V2_G002160 TC02V2_G007010 TC09V2_G003980 TC09V2_G028220 TC10V2_G009720 TC03V2_G009930 TC05V2_G000840
0.123682	11	52	1.81837	GO:0048646 Anatomical structure formation involved in morphogenesis	TC02V2_G015050 TC02V2_G002160 TC02V2_G012380 TC02V2_G017320 TC05V2_G003430 TC06V2_G000400 TC09V2_G001960 TC09V2_G003980 TC09V2_G028220 TC10V2_G014140 TC04V2_G007160
0.123682	16	85	1.61806	GO:0000160 Phosphorelay signal transduction system	TC02V2_G017440 TC02V2_G020880 TC02V2_G026350 TC03V2_G000130 TC03V2_G020360 TC05V2_G000840 TC05V2_G011770 TC05V2_G022960 TC06V2_G000400 TC06V2_G002020 TC09V2_G000870 TC09V2_G029720 TC10V2_G013890 TC04V2_G001370 TC03V2_G009930 TC09V2_G007800
0.123682	2	3	5.73062	GO:0051703 Biological process involved in intraspecies interaction between organisms	TC05V2_G024100 TC09V2_G029260
0.123682	18	99	1.5629	GO:0006325 Chromatin organization	TC02V2_G005300 TC05V2_G003750 TC05V2_G003760 TC09V2_G014760 TC09V2_G027340 TC09V2_G027890 TC10V2_G003820 TC10V2_G005180 TC03V2_G009930 TC02V2_G009720 TC02V2_G012560 TC03V2_G001460 TC03V2_G007070 TC06V2_G001530 TC09V2_G007160 TC09V2_G011170 TC09V2_G030040 TC05V2_G024090
0.123682	2	3	5.73062	GO:0070298 Negative regulation of phosphorelay signal transduction system	TC05V2_G000840 TC09V2_G029720
0.123682	2	3	5.73062	GO:0071027 Nuclear rna surveillance	TC03V2_G000780 TC08V2_G003520
0.123682	2	3	5.73062	GO:0071168 Protein localization to chromatin	TC03V2_G009930 TC04V2_G007910
0.123682	12	59	1.74833	GO:0071407 Cellular response to organic cyclic compound	TC08V2_G004850 TC10V2_G000030 TC02V2_G003750 TC02V2_G016860 TC05V2_G002230 TC06V2_G000400 TC07V2_G009860 TC09V2_G025940 TC02V2_G001050 TC02V2_G011910 TC02V2_G027390 TC05V2_G024130
0.123682	2	3	5.73062	GO:0071423 Malate transmembrane transport	TC02V2_G011030 TC09V2_G017330
0.123682	2	3	5.73062	GO:0080027 Response to herbivore	TC05V2_G023440 TC04V2_G001370
0.123682	2	3	5.73062	GO:0080051 Cutin transport	TC03V2_G006670 TC09V2_G010040
0.123682	2	3	5.73062	GO:0098609 Cell-cell adhesion	TC05V2_G024100 TC10V2_G002010
0.123682	2	3	5.73062	GO:0099587 Inorganic ion import across plasma membrane	TC05V2_G024930 TC10V2_G007090
0.123682	2	3	5.73062	GO:0141067 Intracellular nitrogen homeostasis	TC02V2_G011030 TC03V2_G016600
0.123682	2	3	5.73062	GO:1900376 Regulation of secondary metabolite biosynthetic process	TC06V2_G008120 TC10V2_G003290
0.123682	12	59	1.74833	GO:1901617 Organic hydroxy compound biosynthetic process	TC02V2_G002560 TC02V2_G012420 TC05V2_G001360 TC05V2_G001930 TC10V2_G000510 TC02V2_G002570 TC02V2_G002590 TC02V2_G002600 TC03V2_G011830 TC06V2_G007290 TC07V2_G004400 TC09V2_G025570
0.123682	2	3	5.73062	GO:0006449 Regulation of translational termination	TC02V2_G029140 TC03V2_G007830
0.123682	2	3	5.73062	GO:0006452 Translational frameshifting	TC02V2_G029140 TC03V2_G007830
0.123682	2	3	5.73062	GO:0006537 Glutamate biosynthetic process	TC03V2_G016250 TC05V2_G011590
0.123682	2	3	5.73062	GO:0009269 Response to desiccation	TC05V2_G000020 TC09V2_G023450
0.123682	7	28	2.14898	GO:0000910 Cytokinesis	TC03V2_G025950 TC07V2_G002410 TC09V2_G012890 TC02V2_G029120 TC03V2_G021840 TC10V2_G009720 TC03V2_G013390
0.123682	2	3	5.73062	GO:0009635 Response to herbicide	TC09V2_G003980 TC10V2_G014140
0.123682	7	28	2.14898	GO:0009743 Response to carbohydrate	TC08V2_G000590 TC09V2_G016080 TC02V2_G014400 TC03V2_G024000 TC09V2_G028790 TC10V2_G000390 TC10V2_G001530
0.123682	2	3	5.73062	GO:0010105 Negative regulation of ethylene-activated signaling pathway	TC05V2_G000840 TC09V2_G029720
0.124112	3	7	3.68397	GO:0015866 Adp transport	TC02V2_G015460 TC03V2_G008760 TC09V2_G019100
0.124112	3	7	3.68397	GO:0005986 Sucrose biosynthetic process	TC05V2_G002170 TC09V2_G001960 TC09V2_G011510
0.124112	3	7	3.68397	GO:0031365 N-terminal protein amino acid modification	TC04V2_G004110 TC09V2_G007420 TC09V2_G011460
0.124112	3	7	3.68397	GO:0036293 Response to decreased oxygen levels	TC10V2_G010520 TC06V2_G000400 TC09V2_G016080
0.124112	3	7	3.68397	GO:0051056 Regulation of small gtpase mediated signal transduction	TC02V2_G029270 TC04V2_G007410 TC09V2_G005920
0.124112	8	34	2.02257	GO:0072527 Pyrimidine-containing compound metabolic process	TC02V2_G000010 TC03V2_G004680 TC03V2_G010100 TC03V2_G024960 TC07V2_G002600 TC07V2_G004400 TC07V2_G006340 TC09V2_G025570
0.124112	3	7	3.68397	GO:0140021 Mitochondrial adp transmembrane transport	TC02V2_G015460 TC03V2_G008760 TC09V2_G019100
0.124112	3	7	3.68397	GO:1901679 Nucleotide transmembrane transport	TC02V2_G015460 TC03V2_G008760 TC09V2_G019100
0.124112	3	7	3.68397	GO:1902532 Negative regulation of intracellular signal transduction	TC10V2_G010520 TC05V2_G000840 TC09V2_G029720
0.124112	3	7	3.68397	GO:1990544 Mitochondrial atp transmembrane transport	TC02V2_G015460 TC03V2_G008760 TC09V2_G019100
0.124112	3	7	3.68397	GO:0009631 Cold acclimation	TC07V2_G004880 TC02V2_G022320 TC10V2_G003290
0.124112	3	7	3.68397	GO:0010152 Pollen maturation	TC03V2_G005950 TC07V2_G003970 TC05V2_G015990
0.125422	17	93	1.5713	GO:0051239 Regulation of multicellular organismal process	TC09V2_G023800 TC02V2_G012560 TC05V2_G009810 TC07V2_G004620 TC09V2_G000990 TC09V2_G003980 TC09V2_G011170 TC09V2_G017520 TC09V2_G030040 TC05V2_G015450 TC03V2_G006130 TC03V2_G009930 TC03V2_G016600 TC05V2_G000840 TC05V2_G013990 TC09V2_G003340 TC09V2_G016950
0.12661	5	17	2.52822	GO:0019827 Stem cell population maintenance	TC02V2_G012560 TC09V2_G002250 TC09V2_G010150 TC09V2_G028810 TC10V2_G000390
0.12661	5	17	2.52822	GO:0071695 Anatomical structure maturation	TC02V2_G010130 TC02V2_G025310 TC03V2_G018410 TC05V2_G014760 TC08V2_G001820
0.12661	5	17	2.52822	GO:0072598 Protein localization to chloroplast	TC02V2_G014400 TC09V2_G024360 TC02V2_G004110 TC02V2_G027730 TC09V2_G030300
0.12661	5	17	2.52822	GO:0090174 Organelle membrane fusion	TC03V2_G019750 TC03V2_G025730 TC04V2_G007400 TC05V2_G021640 TC02V2_G029280
0.12661	5	17	2.52822	GO:0098727 Maintenance of cell number	TC02V2_G012560 TC09V2_G002250 TC09V2_G010150 TC09V2_G028810 TC10V2_G000390
0.12661	5	17	2.52822	GO:0009226 Nucleotide-sugar biosynthetic process	TC02V2_G028780 TC04V2_G007870 TC05V2_G002870 TC05V2_G004160 TC10V2_G003800
0.12661	5	17	2.52822	GO:0010054 Trichoblast differentiation	TC02V2_G010130 TC02V2_G025310 TC03V2_G018410 TC05V2_G014760 TC08V2_G001820
0.130823	10	47	1.82892	GO:0048585 Negative regulation of response to stimulus	TC10V2_G010520 TC02V2_G012560 TC05V2_G000840 TC09V2_G006390 TC09V2_G029720 TC09V2_G028270 TC02V2_G027390 TC05V2_G009180 TC05V2_G024130 TC08V2_G000770
0.130823	10	47	1.82892	GO:0065004 Protein-dna complex assembly	TC05V2_G003750 TC05V2_G003760 TC09V2_G014760 TC09V2_G027340 TC09V2_G027890 TC10V2_G003820 TC10V2_G005180 TC02V2_G009720 TC03V2_G007070 TC04V2_G007910
0.130823	10	47	1.82892	GO:0071824 Protein-dna complex organization	TC05V2_G003750 TC05V2_G003760 TC09V2_G014760 TC09V2_G027340 TC09V2_G027890 TC10V2_G003820 TC10V2_G005180 TC02V2_G009720 TC03V2_G007070 TC04V2_G007910
0.132057	4	12	2.86531	GO:0002239 Response to oomycetes	TC06V2_G000400 TC02V2_G027390 TC10V2_G007090 TC05V2_G024130
0.132057	4	12	2.86531	GO:0006012 Galactose metabolic process	TC02V2_G021980 TC05V2_G024520 TC05V2_G027140 TC06V2_G000640
0.132057	4	12	2.86531	GO:0006074 (1->3)-beta-d-glucan metabolic process	TC02V2_G015220 TC03V2_G009950 TC09V2_G018150 TC09V2_G018210
0.132057	4	12	2.86531	GO:0006075 (1->3)-beta-d-glucan biosynthetic process	TC02V2_G015220 TC03V2_G009950 TC09V2_G018150 TC09V2_G018210
0.132057	4	12	2.86531	GO:0045037 Protein import into chloroplast stroma	TC02V2_G014400 TC09V2_G024360 TC02V2_G027730 TC09V2_G030300
0.132057	4	12	2.86531	GO:0009251 Glucan catabolic process	TC05V2_G009940 TC05V2_G015690 TC08V2_G003540 TC02V2_G022320
0.132057	4	12	2.86531	GO:0010114 Response to red light	TC03V2_G016010 TC10V2_G002740 TC10V2_G005860 TC09V2_G000520
0.136421	6	23	2.24242	GO:0071446 Cellular response to salicylic acid stimulus	TC02V2_G016860 TC06V2_G000400 TC02V2_G001050 TC02V2_G011910 TC02V2_G027390 TC05V2_G024130
0.136421	6	23	2.24242	GO:0009640 Photomorphogenesis	TC03V2_G009310 TC09V2_G017520 TC02V2_G027730 TC05V2_G025210 TC06V2_G007710 TC09V2_G003340
0.138453	8	35	1.96479	GO:0090696 Post-embryonic plant organ development	TC02V2_G002160 TC02V2_G007010 TC02V2_G017320 TC09V2_G003980 TC09V2_G028220 TC10V2_G009720 TC03V2_G009930 TC05V2_G000840
0.139169	14	74	1.62626	GO:0006338 Chromatin remodeling	TC05V2_G003750 TC05V2_G003760 TC09V2_G014760 TC09V2_G027340 TC09V2_G027890 TC10V2_G003820 TC10V2_G005180 TC03V2_G009930 TC02V2_G009720 TC03V2_G007070 TC06V2_G001530 TC09V2_G011170 TC09V2_G030040 TC05V2_G024090
0.144901	18	102	1.51693	GO:0051276 Chromosome organization	TC02V2_G009440 TC02V2_G023720 TC04V2_G004340 TC03V2_G012080 TC07V2_G009920 TC03V2_G012760 TC03V2_G012840 TC04V2_G004650 TC04V2_G006900 TC04V2_G007910 TC05V2_G004580 TC05V2_G011160 TC07V2_G002270 TC09V2_G018620 TC10V2_G003410 TC10V2_G010420 TC03V2_G020690 TC07V2_G001360
0.149513	13	68	1.64334	GO:0048580 Regulation of post-embryonic development	TC09V2_G023800 TC05V2_G009810 TC07V2_G004620 TC09V2_G000990 TC09V2_G003980 TC09V2_G011170 TC09V2_G017520 TC09V2_G030040 TC05V2_G015450 TC03V2_G006130 TC03V2_G009930 TC03V2_G016600 TC05V2_G000840
0.153131	9	42	1.84199	GO:0030244 Cellulose biosynthetic process	TC09V2_G012890 TC02V2_G012440 TC03V2_G025950 TC05V2_G012320 TC05V2_G017740 TC07V2_G001020 TC10V2_G000390 TC05V2_G014620 TC06V2_G000370
0.153928	5	18	2.38776	GO:0010628 Positive regulation of gene expression	TC02V2_G029140 TC03V2_G007830 TC03V2_G009930 TC08V2_G003520 TC09V2_G017410
0.153928	5	18	2.38776	GO:0016126 Sterol biosynthetic process	TC02V2_G002560 TC02V2_G012420 TC02V2_G002570 TC02V2_G002590 TC02V2_G002600
0.153928	5	18	2.38776	GO:0051651 Maintenance of location in cell	TC08V2_G002370 TC09V2_G008530 TC02V2_G012040 TC05V2_G017590 TC05V2_G009180
0.153928	15	82	1.57243	GO:0006310 Dna recombination	TC02V2_G009220 TC05V2_G004580 TC03V2_G012080 TC09V2_G014720 TC02V2_G023850 TC03V2_G008440 TC03V2_G012760 TC03V2_G026580 TC05V2_G026660 TC09V2_G007050 TC09V2_G015780 TC03V2_G019860 TC03V2_G020690 TC07V2_G001360 TC09V2_G003340
0.153928	5	18	2.38776	GO:0009846 Pollen germination	TC02V2_G012440 TC02V2_G026220 TC05V2_G011200 TC05V2_G015990 TC09V2_G008590
0.156838	143	1079	1.13922	GO:0016310 Phosphorylation	TC02V2_G012260 TC02V2_G022210 TC03V2_G003520 TC03V2_G005950 TC05V2_G009500 TC05V2_G013420 TC09V2_G009070 TC09V2_G018920 TC09V2_G019560 TC09V2_G020500 TC05V2_G024130 TC02V2_G000040 TC02V2_G000880 TC02V2_G002630 TC02V2_G003750 TC02V2_G004620 TC02V2_G006880 TC02V2_G006970 TC02V2_G007220 TC02V2_G007810 TC02V2_G012130 TC02V2_G012230 TC02V2_G012540 TC02V2_G014060 TC02V2_G015810 TC02V2_G017440 TC02V2_G0…
0.157635	8	36	1.91021	GO:0033014 Tetrapyrrole biosynthetic process	TC02V2_G013420 TC03V2_G011130 TC05V2_G011210 TC07V2_G008920 TC09V2_G004510 TC10V2_G013620 TC05V2_G012880 TC09V2_G000520
0.157635	8	36	1.91021	GO:0048588 Developmental cell growth	TC05V2_G013990 TC02V2_G005000 TC02V2_G025310 TC03V2_G018410 TC05V2_G014760 TC02V2_G026220 TC04V2_G000540 TC05V2_G011200
0.158502	12	62	1.66373	GO:0043161 Proteasome-mediated ubiquitin-dependent protein catabolic process	TC02V2_G004620 TC02V2_G015700 TC03V2_G010070 TC03V2_G022360 TC04V2_G003810 TC05V2_G001750 TC05V2_G020300 TC05V2_G026020 TC10V2_G009270 TC05V2_G002540 TC10V2_G005210 TC05V2_G000840
0.159979	6	24	2.14898	GO:0010648 Negative regulation of cell communication	TC10V2_G010520 TC05V2_G000840 TC09V2_G006390 TC09V2_G029720 TC05V2_G024130 TC08V2_G000770
0.159979	6	24	2.14898	GO:0023057 Negative regulation of signaling	TC10V2_G010520 TC05V2_G000840 TC09V2_G006390 TC09V2_G029720 TC05V2_G024130 TC08V2_G000770
0.159979	6	24	2.14898	GO:0048527 Lateral root development	TC02V2_G002160 TC02V2_G007010 TC09V2_G003980 TC09V2_G028220 TC10V2_G009720 TC03V2_G009930
0.159979	7	30	2.00572	GO:0006779 Porphyrin-containing compound biosynthetic process	TC03V2_G011130 TC05V2_G011210 TC07V2_G008920 TC09V2_G004510 TC10V2_G013620 TC05V2_G012880 TC09V2_G000520
0.159979	7	30	2.00572	GO:0009066 Aspartate family amino acid metabolic process	TC02V2_G008910 TC02V2_G008950 TC02V2_G012230 TC03V2_G014090 TC05V2_G020400 TC07V2_G002830 TC09V2_G022120
0.159979	6	24	2.14898	GO:0009968 Negative regulation of signal transduction	TC10V2_G010520 TC05V2_G000840 TC09V2_G006390 TC09V2_G029720 TC05V2_G024130 TC08V2_G000770
0.162234	76	545	1.1987	GO:0006508 Proteolysis	TC02V2_G004620 TC02V2_G004720 TC02V2_G004810 TC02V2_G009470 TC02V2_G015700 TC02V2_G018290 TC02V2_G022140 TC03V2_G010070 TC03V2_G016060 TC03V2_G017080 TC03V2_G020050 TC03V2_G022360 TC03V2_G026090 TC04V2_G003810 TC05V2_G001750 TC05V2_G008050 TC05V2_G020300 TC05V2_G026020 TC07V2_G004500 TC07V2_G004520 TC08V2_G000140 TC09V2_G006590 TC09V2_G013510 TC09V2_G018740 TC09V2_G022040 TC10V2_G009270 TC03V2_G0…
0.165179	3	8	3.22348	GO:0010928 Regulation of auxin mediated signaling pathway	TC08V2_G002950 TC09V2_G016080 TC10V2_G001530
0.165179	3	8	3.22348	GO:0015766 Disaccharide transport	TC02V2_G016860 TC02V2_G029980 TC10V2_G004190
0.165179	3	8	3.22348	GO:0015770 Sucrose transport	TC02V2_G016860 TC02V2_G029980 TC10V2_G004190
0.165179	3	8	3.22348	GO:0015772 Oligosaccharide transport	TC02V2_G016860 TC02V2_G029980 TC10V2_G004190
0.165179	3	8	3.22348	GO:0015867 Atp transport	TC02V2_G015460 TC03V2_G008760 TC09V2_G019100
0.165179	3	8	3.22348	GO:0015868 Purine ribonucleotide transport	TC02V2_G015460 TC03V2_G008760 TC09V2_G019100
0.165179	3	8	3.22348	GO:0043101 Purine-containing compound salvage	TC02V2_G020430 TC05V2_G001120 TC10V2_G006240
0.165179	4	13	2.6449	GO:0043255 Regulation of carbohydrate biosynthetic process	TC03V2_G000200 TC05V2_G012880 TC05V2_G014620 TC10V2_G000390
0.165179	3	8	3.22348	GO:0006120 Mitochondrial electron transport nadh to ubiquinone	TC05V2_G017700 TC02V2_G005990 TC05V2_G015560
0.165179	3	8	3.22348	GO:0045490 Pectin catabolic process	TC04V2_G007360 TC02V2_G023260 TC04V2_G002060
0.165179	3	8	3.22348	GO:0046128 Purine ribonucleoside metabolic process	TC02V2_G013180 TC03V2_G009830 TC10V2_G006240
0.165179	3	8	3.22348	GO:0046164 Alcohol catabolic process	TC03V2_G005020 TC02V2_G005320 TC03V2_G009930
0.165179	3	8	3.22348	GO:0070482 Response to oxygen levels	TC10V2_G010520 TC06V2_G000400 TC09V2_G016080
0.165179	3	8	3.22348	GO:1901616 Organic hydroxy compound catabolic process	TC03V2_G005020 TC02V2_G005320 TC03V2_G009930
0.165179	3	8	3.22348	GO:2000070 Regulation of response to water deprivation	TC03V2_G005950 TC02V2_G014400 TC09V2_G008890
0.165179	3	8	3.22348	GO:0006560 Proline metabolic process	TC05V2_G011950 TC10V2_G002870 TC03V2_G006250
0.165179	16	90	1.52817	GO:0008299 Isoprenoid biosynthetic process	TC02V2_G012420 TC06V2_G006570 TC10V2_G000510 TC01V2_G000160 TC03V2_G023890 TC05V2_G016190 TC06V2_G002950 TC06V2_G004110 TC06V2_G004180 TC06V2_G005360 TC08V2_G001220 TC09V2_G014050 TC09V2_G017770 TC09V2_G020850 TC09V2_G028620 TC09V2_G000520
0.165179	3	8	3.22348	GO:0009078 Pyruvate family amino acid metabolic process	TC06V2_G002870 TC09V2_G021560 TC02V2_G022440
0.165179	4	13	2.6449	GO:0009218 Pyrimidine ribonucleotide metabolic process	TC02V2_G000010 TC03V2_G010100 TC03V2_G024960 TC07V2_G006340
0.165179	4	13	2.6449	GO:0009220 Pyrimidine ribonucleotide biosynthetic process	TC02V2_G000010 TC03V2_G010100 TC03V2_G024960 TC07V2_G006340
0.165179	3	8	3.22348	GO:0009695 Jasmonic acid biosynthetic process	TC08V2_G001490 TC09V2_G006890 TC02V2_G015230
0.165179	22	133	1.42188	GO:0010154 Fruit development	TC02V2_G007010 TC02V2_G016860 TC02V2_G017320 TC07V2_G003970 TC07V2_G004620 TC09V2_G024420 TC10V2_G009720 TC02V2_G009940 TC02V2_G014080 TC02V2_G029620 TC03V2_G006670 TC03V2_G009930 TC03V2_G016480 TC03V2_G016580 TC03V2_G019210 TC04V2_G007910 TC05V2_G018020 TC08V2_G000590 TC09V2_G016950 TC09V2_G017930 TC09V2_G024360 TC09V2_G028790
0.171857	13	70	1.59639	GO:0005996 Monosaccharide metabolic process	TC02V2_G017100 TC04V2_G002430 TC04V2_G004480 TC05V2_G002170 TC05V2_G004160 TC07V2_G002620 TC10V2_G003800 TC02V2_G021980 TC05V2_G024520 TC05V2_G027140 TC06V2_G000640 TC08V2_G005410 TC03V2_G000200
0.172821	18	105	1.47359	GO:0048229 Gametophyte development	TC03V2_G005950 TC03V2_G012860 TC03V2_G016010 TC05V2_G026020 TC07V2_G003970 TC08V2_G004490 TC09V2_G001960 TC09V2_G022360 TC02V2_G026220 TC03V2_G016270 TC03V2_G018820 TC04V2_G007160 TC05V2_G015990 TC07V2_G009360 TC09V2_G007050 TC09V2_G008590 TC09V2_G017410 TC09V2_G029260
0.172821	8	37	1.85858	GO:0001510 Rna methylation	TC05V2_G001760 TC10V2_G002990 TC02V2_G006700 TC02V2_G013180 TC05V2_G011710 TC07V2_G000900 TC07V2_G001090 TC10V2_G003370
0.178699	5	19	2.26209	GO:0061025 Membrane fusion	TC03V2_G019750 TC03V2_G025730 TC04V2_G007400 TC05V2_G021640 TC02V2_G029280
0.178699	7	31	1.94102	GO:0072528 Pyrimidine-containing compound biosynthetic process	TC02V2_G000010 TC03V2_G010100 TC03V2_G024960 TC07V2_G002600 TC07V2_G004400 TC07V2_G006340 TC09V2_G025570
0.178699	5	19	2.26209	GO:0007264 Small gtpase-mediated signal transduction	TC02V2_G010690 TC02V2_G029270 TC03V2_G000430 TC04V2_G007410 TC09V2_G005920
0.178699	5	19	2.26209	GO:0009965 Leaf morphogenesis	TC02V2_G003860 TC05V2_G003430 TC07V2_G007470 TC03V2_G006670 TC09V2_G017930
0.179508	11	57	1.65886	GO:0042440 Pigment metabolic process	TC03V2_G011130 TC05V2_G011210 TC09V2_G004510 TC09V2_G010870 TC02V2_G014400 TC02V2_G029730 TC05V2_G012880 TC07V2_G008050 TC09V2_G000520 TC09V2_G028790 TC10V2_G001530
0.179508	11	57	1.65886	GO:0043414 Macromolecule methylation	TC05V2_G001760 TC09V2_G012090 TC10V2_G002990 TC02V2_G006700 TC02V2_G013180 TC05V2_G011710 TC07V2_G000900 TC07V2_G001090 TC09V2_G000150 TC09V2_G010350 TC10V2_G003370
0.181032	6	25	2.06302	GO:0042176 Regulation of protein catabolic process	TC03V2_G022360 TC02V2_G004510 TC02V2_G015700 TC05V2_G026020 TC08V2_G004150 TC10V2_G009270
0.181032	6	25	2.06302	GO:1901657 Glycosyl compound metabolic process	TC02V2_G013180 TC03V2_G009830 TC10V2_G006240 TC10V2_G007730 TC10V2_G007740 TC07V2_G008050
0.181262	26	164	1.36277	GO:0009888 Tissue development	TC02V2_G007730 TC02V2_G010130 TC02V2_G022210 TC02V2_G025310 TC03V2_G009260 TC03V2_G018410 TC05V2_G014760 TC07V2_G004620 TC08V2_G001820 TC10V2_G002010 TC02V2_G004760 TC03V2_G016480 TC03V2_G016580 TC03V2_G017390 TC03V2_G018820 TC05V2_G015990 TC05V2_G024090 TC06V2_G000370 TC09V2_G002250 TC09V2_G003340 TC09V2_G018620 TC09V2_G023200 TC09V2_G028750 TC09V2_G028810 TC10V2_G000390 TC10V2_G001220
0.185457	13	71	1.5739	GO:0071215 Cellular response to abscisic acid stimulus	TC03V2_G018980 TC05V2_G000660 TC09V2_G020080 TC02V2_G016860 TC03V2_G016070 TC09V2_G006390 TC10V2_G003040 TC10V2_G011740 TC04V2_G001370 TC05V2_G024130 TC08V2_G000770 TC09V2_G028790 TC10V2_G001220
0.185457	13	71	1.5739	GO:0097306 Cellular response to alcohol	TC03V2_G018980 TC05V2_G000660 TC09V2_G020080 TC02V2_G016860 TC03V2_G016070 TC09V2_G006390 TC10V2_G003040 TC10V2_G011740 TC04V2_G001370 TC05V2_G024130 TC08V2_G000770 TC09V2_G028790 TC10V2_G001220
0.18911	2	4	4.29797	GO:0010380 Regulation of chlorophyll biosynthetic process	TC05V2_G012880 TC09V2_G000520
0.18911	2	4	4.29797	GO:0010586 Mirna metabolic process	TC05V2_G024090 TC08V2_G003520
0.18911	8	38	1.80967	GO:0015849 Organic acid transport	TC07V2_G003690 TC02V2_G011030 TC03V2_G010300 TC04V2_G002660 TC07V2_G002460 TC07V2_G003970 TC09V2_G017330 TC04V2_G007160
0.18911	2	4	4.29797	GO:0016032 Viral process	TC03V2_G019420 TC03V2_G011710
0.18911	2	4	4.29797	GO:0017038 Protein import	TC02V2_G014400 TC02V2_G004110
0.18911	2	4	4.29797	GO:0018126 Protein hydroxylation	TC02V2_G009260 TC08V2_G004280
0.18911	2	4	4.29797	GO:0018401 Peptidyl-proline hydroxylation to 4-hydroxy-l-proline	TC02V2_G009260 TC08V2_G004280
0.18911	2	4	4.29797	GO:0019471 4-hydroxyproline metabolic process	TC02V2_G009260 TC08V2_G004280
0.18911	2	4	4.29797	GO:0019511 Peptidyl-proline hydroxylation	TC02V2_G009260 TC08V2_G004280
0.18911	2	4	4.29797	GO:0030388 Fructose 1,6-bisphosphate metabolic process	TC02V2_G018410 TC05V2_G002170
0.18911	2	4	4.29797	GO:0032006 Regulation of tor signaling	TC03V2_G024620 TC03V2_G016600
0.18911	2	4	4.29797	GO:0006011 Udp-glucose metabolic process	TC10V2_G001090 TC04V2_G000010
0.18911	2	4	4.29797	GO:0034406 Cell wall beta-glucan metabolic process	TC10V2_G002010 TC10V2_G000390
0.18911	2	4	4.29797	GO:0043043 Peptide biosynthetic process	TC02V2_G018220 TC03V2_G023280
0.18911	2	4	4.29797	GO:0043243 Positive regulation of protein-containing complex disassembly	TC02V2_G029140 TC03V2_G007830
0.18911	2	4	4.29797	GO:0046685 Response to arsenic-containing substance	TC03V2_G017710 TC10V2_G002890
0.18911	8	38	1.80967	GO:0046942 Carboxylic acid transport	TC07V2_G003690 TC02V2_G011030 TC03V2_G010300 TC04V2_G002660 TC07V2_G002460 TC07V2_G003970 TC09V2_G017330 TC04V2_G007160
0.18911	2	4	4.29797	GO:0048015 Phosphatidylinositol-mediated signaling	TC02V2_G022000 TC09V2_G008590
0.18911	2	4	4.29797	GO:0048829 Root cap development	TC09V2_G028790 TC10V2_G006120
0.18911	2	4	4.29797	GO:0051701 Biological process involved in interaction with host	TC03V2_G011710 TC03V2_G013390
0.18911	2	4	4.29797	GO:0052541 Plant-type cell wall cellulose metabolic process	TC10V2_G002010 TC10V2_G000390
0.18911	8	38	1.80967	GO:0090698 Post-embryonic plant morphogenesis	TC02V2_G002160 TC02V2_G003860 TC02V2_G017320 TC09V2_G003980 TC09V2_G028220 TC10V2_G009720 TC03V2_G006670 TC08V2_G000590
0.18911	2	4	4.29797	GO:0097501 Stress response to metal ion	TC03V2_G015950 TC03V2_G006780
0.18911	2	4	4.29797	GO:1901002 Positive regulation of response to salt stress	TC09V2_G008890 TC09V2_G028320
0.18911	2	4	4.29797	GO:1901463 Regulation of tetrapyrrole biosynthetic process	TC05V2_G012880 TC09V2_G000520
0.18911	2	4	4.29797	GO:0006426 Glycyl-trna aminoacylation	TC03V2_G011650 TC02V2_G016290
0.18911	2	4	4.29797	GO:1902533 Positive regulation of intracellular signal transduction	TC03V2_G024620 TC03V2_G016600
0.18911	2	4	4.29797	GO:0006448 Regulation of translational elongation	TC02V2_G029140 TC03V2_G007830
0.18911	2	4	4.29797	GO:0006473 Protein acetylation	TC04V2_G004110 TC09V2_G011460
0.18911	2	4	4.29797	GO:0006474 N-terminal protein amino acid acetylation	TC04V2_G004110 TC09V2_G011460
0.18911	2	4	4.29797	GO:0000266 Mitochondrial fission	TC09V2_G023300 TC05V2_G025680
0.18911	2	4	4.29797	GO:0006546 Glycine catabolic process	TC03V2_G019250 TC09V2_G004690
0.18911	2	4	4.29797	GO:0006556 S-adenosylmethionine biosynthetic process	TC05V2_G005860 TC05V2_G027320
0.18911	2	4	4.29797	GO:0007032 Endosome organization	TC08V2_G004040 TC09V2_G009960
0.18911	2	4	4.29797	GO:0007155 Cell adhesion	TC05V2_G024100 TC10V2_G002010
0.18911	2	4	4.29797	GO:0008361 Regulation of cell size	TC02V2_G003860 TC03V2_G013280
0.18911	2	4	4.29797	GO:0009052 Pentose-phosphate shunt non-oxidative branch	TC02V2_G024220 TC05V2_G023800
0.18911	2	4	4.29797	GO:0009080 Pyruvate family amino acid catabolic process	TC09V2_G021560 TC02V2_G022440
0.190623	24	151	1.36624	GO:0050793 Regulation of developmental process	TC09V2_G023800 TC02V2_G007010 TC02V2_G012560 TC02V2_G017320 TC02V2_G022210 TC05V2_G009810 TC07V2_G004620 TC07V2_G007470 TC09V2_G000990 TC09V2_G003980 TC09V2_G011170 TC09V2_G017520 TC09V2_G030040 TC05V2_G015450 TC03V2_G006130 TC03V2_G009930 TC03V2_G016270 TC03V2_G016600 TC03V2_G018820 TC05V2_G000840 TC05V2_G013990 TC09V2_G016950 TC09V2_G028810 TC10V2_G001530
0.190634	12	65	1.58694	GO:0016114 Terpenoid biosynthetic process	TC06V2_G006570 TC10V2_G000510 TC03V2_G023890 TC06V2_G002950 TC06V2_G004110 TC06V2_G004180 TC08V2_G001220 TC09V2_G014050 TC09V2_G017770 TC09V2_G020850 TC09V2_G028620 TC09V2_G000520
0.191315	4	14	2.45598	GO:0005992 Trehalose biosynthetic process	TC02V2_G021440 TC02V2_G026590 TC03V2_G000550 TC03V2_G025630
0.191315	4	14	2.45598	GO:0010101 Post-embryonic root morphogenesis	TC02V2_G002160 TC09V2_G003980 TC09V2_G028220 TC10V2_G009720
0.191315	4	14	2.45598	GO:0010102 Lateral root morphogenesis	TC02V2_G002160 TC09V2_G003980 TC09V2_G028220 TC10V2_G009720
0.191363	13	72	1.55204	GO:0010383 Cell wall polysaccharide metabolic process	TC02V2_G017650 TC04V2_G004470 TC09V2_G014310 TC09V2_G014350 TC09V2_G014360 TC09V2_G014370 TC09V2_G014390 TC09V2_G014400 TC09V2_G014430 TC09V2_G014450 TC09V2_G021950 TC10V2_G002010 TC10V2_G000390
0.192424	7	32	1.88036	GO:0009932 Cell tip growth	TC05V2_G013990 TC02V2_G005000 TC03V2_G018410 TC05V2_G014760 TC02V2_G026220 TC04V2_G000540 TC05V2_G011200
0.198984	6	26	1.98368	GO:0051235 Maintenance of location	TC08V2_G002370 TC09V2_G008530 TC02V2_G012040 TC03V2_G000670 TC05V2_G017590 TC05V2_G009180
0.198984	6	26	1.98368	GO:0009611 Response to wounding	TC03V2_G006670 TC02V2_G012560 TC08V2_G005380 TC02V2_G029730 TC04V2_G001370 TC08V2_G001490

## Sheet: Table S15
	Table S15 Enriched KEGG pathways associated with candidate resistance genes harboring coding-region SNPs in T. cacao
False discovery rate (FDR)	Number of genes in query	Number of genes in pathway	Fold Enrichment	KEGG pathway	Associated genes
4.28331e-23	127	421	2.59307	Path:tcc01100 Metabolic pathways	TC10V2_G000510 TC10V2_G003520 TC10V2_G003800 TC10V2_G005570 TC10V2_G005860 TC10V2_G007970 TC10V2_G013550 TC09V2_G001960 TC09V2_G003770 TC09V2_G004540 TC09V2_G007890 TC09V2_G008070 TC09V2_G010870 TC09V2_G011610 TC09V2_G012630 TC09V2_G012740 TC09V2_G014590 TC09V2_G015750 TC09V2_G016320 TC09V2_G018310 TC09V2_G019590 TC09V2_G020900 TC09V2_G022060 TC09V2_G023600 TC09V2_G024320 TC09V2_G025450 TC09V2_G0…
2.8116e-13	66	207	2.74073	Path:tcc01110 Biosynthesis of secondary metabolites	TC10V2_G000220 TC10V2_G000510 TC10V2_G003520 TC10V2_G013550 TC09V2_G001960 TC09V2_G007890 TC09V2_G010320 TC09V2_G010870 TC09V2_G014590 TC09V2_G016320 TC09V2_G018310 TC09V2_G024320 TC09V2_G025450 TC09V2_G025610 TC09V2_G027760 TC09V2_G030610 TC08V2_G000620 TC08V2_G001690 TC08V2_G002200 TC08V2_G002760 TC08V2_G003510 TC07V2_G002620 TC07V2_G002830 TC07V2_G008540 TC06V2_G001200 TC06V2_G001500 TC06V2_G0…
1.66365e-06	28	81	2.97143	Path:tcc04075 Plant hormone signal transduction	TC10V2_G001960 TC09V2_G006250 TC09V2_G014370 TC02V2_G005550 TC09V2_G019560 TC09V2_G020500 TC09V2_G021950 TC08V2_G003500 TC08V2_G004850 TC06V2_G001440 TC06V2_G001550 TC06V2_G007740 TC05V2_G000660 TC05V2_G005410 TC05V2_G009500 TC05V2_G012050 TC05V2_G013420 TC05V2_G023460 TC04V2_G003810 TC03V2_G005950 TC03V2_G016070 TC03V2_G018980 TC02V2_G002430 TC02V2_G005530 TC02V2_G005560 TC02V2_G005780 TC02V2_G0…
1.05494e-05	15	31	4.15932	Path:tcc04626 Plant-pathogen interaction	TC09V2_G019560 TC09V2_G020500 TC09V2_G027760 TC08V2_G002200 TC06V2_G001440 TC05V2_G009500 TC05V2_G013420 TC03V2_G005950 TC03V2_G009360 TC03V2_G021760 TC03V2_G023820 TC03V2_G025820 TC02V2_G002430 TC02V2_G012260 TC02V2_G025310
1.47197e-05	17	40	3.65327	Path:tcc01230 Biosynthesis of amino acids	TC09V2_G024320 TC09V2_G025450 TC06V2_G002870 TC05V2_G005370 TC05V2_G005860 TC05V2_G011950 TC05V2_G020100 TC05V2_G027320 TC04V2_G001140 TC03V2_G009260 TC03V2_G019320 TC03V2_G019880 TC02V2_G005320 TC02V2_G012230 TC02V2_G018410 TC02V2_G022440 TC01V2_G000620
4.97702e-05	11	20	4.72776	Path:tcc00940 Phenylpropanoid biosynthesis	TC10V2_G013550 TC09V2_G014590 TC09V2_G016320 TC09V2_G030610 TC08V2_G002760 TC06V2_G001200 TC06V2_G003600 TC05V2_G004950 TC05V2_G005360 TC04V2_G000210 TC02V2_G025720
5.64056e-05	12	24	4.29797	Path:tcc03082 ATP-dependent chromatin remodeling	TC09V2_G010220 TC09V2_G011170 TC09V2_G027450 TC09V2_G030040 TC07V2_G004830 TC06V2_G001530 TC06V2_G006190 TC05V2_G003930 TC05V2_G024700 TC04V2_G002990 TC03V2_G001460 TC02V2_G012560
0.000351483	19	60	2.72205	Path:tcc01200 Carbon metabolism	TC07V2_G002830 TC07V2_G008540 TC05V2_G002170 TC05V2_G005370 TC04V2_G000680 TC04V2_G001140 TC04V2_G002430 TC04V2_G004480 TC03V2_G009260 TC03V2_G019250 TC03V2_G019320 TC03V2_G026250 TC02V2_G005320 TC02V2_G017100 TC02V2_G018410 TC02V2_G022440 TC02V2_G027440 TC01V2_G000540 TC01V2_G000620
0.000359823	16	46	2.98989	Path:tcc00190 Oxidative phosphorylation	TC09V2_G004540 TC09V2_G008070 TC09V2_G012630 TC09V2_G012740 TC09V2_G022060 TC09V2_G023600 TC08V2_G002980 TC07V2_G007230 TC06V2_G006020 TC05V2_G015560 TC05V2_G017700 TC04V2_G003860 TC03V2_G015500 TC02V2_G002740 TC02V2_G005990 TC02V2_G018570
0.00048918	8	14	4.91196	Path:tcc00480 Glutathione metabolism	TC05V2_G004670 TC04V2_G001140 TC04V2_G002430 TC03V2_G023220 TC02V2_G004790 TC02V2_G017100 TC02V2_G020520 TC02V2_G027440
0.000607383	14	39	3.08572	Path:tcc04145 Phagosome	TC09V2_G012630 TC09V2_G021110 TC09V2_G025900 TC08V2_G002980 TC08V2_G003730 TC06V2_G000280 TC04V2_G003190 TC04V2_G003860 TC03V2_G000430 TC03V2_G003980 TC03V2_G010680 TC03V2_G014720 TC03V2_G023140 TC03V2_G023270
0.000887798	11	27	3.50205	Path:tcc04814 Motor proteins	TC09V2_G021110 TC09V2_G025900 TC09V2_G027100 TC08V2_G003730 TC06V2_G000280 TC05V2_G014490 TC03V2_G003980 TC03V2_G014720 TC03V2_G023140 TC03V2_G023270 TC02V2_G003410
0.00140255	9	20	3.86817	Path:tcc04016 MAPK signaling pathway-plant	TC08V2_G002650 TC06V2_G001440 TC05V2_G000660 TC03V2_G016070 TC03V2_G018980 TC02V2_G002430 TC02V2_G003850 TC01V2_G000540 TC01V2_G000700
0.00528112	7	15	4.01144	Path:tcc00020 Citrate cycle (TCA cycle)	TC07V2_G002830 TC07V2_G008540 TC05V2_G005370 TC05V2_G027290 TC04V2_G001140 TC02V2_G022170 TC01V2_G000620
0.00649812	14	49	2.45598	Path:tcc01240 Biosynthesis of cofactors	TC09V2_G018310 TC09V2_G025570 TC07V2_G002620 TC07V2_G004400 TC05V2_G001360 TC05V2_G005860 TC05V2_G027320 TC04V2_G005600 TC04V2_G007870 TC03V2_G000670 TC03V2_G010350 TC03V2_G011130 TC03V2_G025400 TC02V2_G028780
0.0119996	6	13	3.96735	Path:tcc01210 2-Oxocarboxylic acid metabolism	TC07V2_G002830 TC06V2_G002870 TC05V2_G005370 TC04V2_G001140 TC02V2_G022440 TC01V2_G000620
0.0137239	10	32	2.68623	Path:tcc00520 Amino sugar and nucleotide sugar metabolism	TC10V2_G003800 TC06V2_G000640 TC05V2_G004160 TC05V2_G024520 TC04V2_G005600 TC04V2_G007870 TC04V2_G008660 TC02V2_G003850 TC02V2_G028780 TC01V2_G000700
0.0137239	13	48	2.32807	Path:tcc04120 Ubiquitin mediated proteolysis	TC09V2_G017520 TC09V2_G018740 TC09V2_G022040 TC07V2_G004520 TC07V2_G008830 TC05V2_G008050 TC05V2_G020300 TC03V2_G022360 TC02V2_G000930 TC02V2_G004620 TC02V2_G004720 TC02V2_G010090 TC02V2_G022140
0.0152361	8	23	2.98989	Path:tcc00270 Cysteine and methionine metabolism	TC07V2_G008540 TC05V2_G005860 TC05V2_G020100 TC05V2_G027320 TC05V2_G027420 TC03V2_G009830 TC03V2_G018370 TC02V2_G012230
0.0152361	8	23	2.98989	Path:tcc01250 Biosynthesis of nucleotide sugars	TC10V2_G003800 TC06V2_G000640 TC05V2_G004160 TC05V2_G024520 TC04V2_G005600 TC04V2_G007870 TC04V2_G008660 TC02V2_G028780
0.0228705	5	11	3.90724	Path:tcc00040 Pentose and glucuronate interconversions	TC04V2_G002060 TC04V2_G007360 TC04V2_G007870 TC02V2_G023260 TC02V2_G028780
0.0228705	5	11	3.90724	Path:tcc00053 Ascorbate and aldarate metabolism	TC07V2_G002620 TC05V2_G004670 TC04V2_G007870 TC02V2_G004790 TC02V2_G028780
0.0229192	7	20	3.00858	Path:tcc00710 Carbon fixation by Calvin cycle	TC07V2_G008540 TC05V2_G002170 TC04V2_G004480 TC03V2_G026250 TC02V2_G005320 TC02V2_G018410 TC02V2_G022440
0.0417721	13	56	1.99548	Path:tcc04141 Protein processing in endoplasmic reticulum	TC10V2_G009820 TC10V2_G010520 TC10V2_G014740 TC09V2_G009460 TC09V2_G022040 TC09V2_G025970 TC09V2_G025980 TC05V2_G026730 TC04V2_G003190 TC03V2_G010680 TC03V2_G023820 TC02V2_G004620 TC02V2_G004720
0.0459438	5	13	3.30613	Path:tcc00030 Pentose phosphate pathway	TC05V2_G002170 TC04V2_G002430 TC02V2_G017100 TC02V2_G018410 TC02V2_G027440
0.0597655	7	24	2.50715	Path:tcc03013 Nucleocytoplasmic transport	TC10V2_G005650 TC09V2_G021620 TC09V2_G021660 TC06V2_G001800 TC05V2_G000820 TC05V2_G026600 TC05V2_G027020
0.0608912	6	19	2.71451	Path:tcc03083 Polycomb repressive complex	TC07V2_G004620 TC04V2_G004490 TC03V2_G001460 TC02V2_G004620 TC02V2_G004720 TC02V2_G012560
0.0695257	7	25	2.40686	Path:tcc00010 Glycolysis/Gluconeogenesis	TC05V2_G001000 TC05V2_G002170 TC03V2_G009260 TC03V2_G019320 TC03V2_G024350 TC02V2_G005320 TC02V2_G018410
0.0697554	4	10	3.43837	Path:tcc00670 One carbon pool by folate	TC05V2_G005860 TC05V2_G027320 TC03V2_G009830 TC03V2_G019250
0.0801185	7	26	2.31429	Path:tcc03050 Proteasome	TC09V2_G006590 TC05V2_G001750 TC05V2_G026020 TC03V2_G010070 TC03V2_G026090 TC02V2_G004810 TC02V2_G015700
0.122285	4	12	2.86531	Path:tcc03060 Protein export	TC09V2_G013510 TC06V2_G002420 TC04V2_G003190 TC03V2_G010680
0.122285	4	12	2.86531	Path:tcc04130 SNARE interactions in vesicular transport	TC09V2_G023320 TC05V2_G021640 TC04V2_G007400 TC02V2_G029280
0.122285	9	41	1.88691	Path:tcc04144 Endocytosis	TC10V2_G006980 TC09V2_G023870 TC09V2_G029400 TC07V2_G008280 TC06V2_G000400 TC04V2_G000980 TC03V2_G006410 TC02V2_G001280 TC02V2_G021990
0.150854	3	8	3.22348	Path:tcc00360 Phenylalanine metabolism	TC09V2_G015750 TC05V2_G000540 TC05V2_G005360
0.150854	3	8	3.22348	Path:tcc00941 Flavonoid biosynthesis	TC09V2_G030610 TC06V2_G003600 TC03V2_G008270
0.18053	2	4	4.29797	Path:tcc00945 Stilbenoid diarylheptanoid and gingerol biosynthesis	TC09V2_G030610 TC06V2_G003600
0.19085	3	9	2.86531	Path:tcc00561 Glycerolipid metabolism	TC09V2_G011610 TC08V2_G001690 TC06V2_G001500
0.19085	3	9	2.86531	Path:tcc00999 Biosynthesis of various plant secondary metabolites	TC09V2_G025610 TC05V2_G005860 TC05V2_G027320

## Sheet: Table S16
	Table S16 Proteins harboring high-impact coding variants in genomic regions under different selection regimes with intermediate allele frequencies in T. cacao
Protein ID	Protein length (aa)	Protein domain name	Domain start position (aa	Domain end position (aa)	SNP position within protein (aa)	Variant consequence	Alternate allele frequency	Alternate allele	Selection category	SIFT prediction	Gene ID	Associated biological process (GO term)
XP_007017945.2	774	Pept_S9A-N	57	472	1	start lost	0.647887	T	Neutral	Not_aplica	Tc08v2_g004590	GO:0019538 Protein metabolic process
XP_007017945.2	774	POPase	540	769	1	start lost	0.647887	T	Neutral	Not_aplica	Tc08v2_g004590	GO:0043170 Macromolecule metabolic process
XP_007017945.2	774	AB-Hydrolase	492	718	1	start lost	0.647887	T	Neutral	Not_aplica	Tc08v2_g004590	GO:0006508 Proteolysis
XP_007038852.2	409	HSP20	203	302	1	start lost	0.172414	C	Neutral	Not_aplica	Tc03v2_g015520	NA
XP_007038852.2	409	SGS	328	407	1	start lost	0.172414	C	Neutral	Not_aplica	Tc03v2_g015520	NA
XP_007038852.2	409	TPR	83	116	1	start lost	0.172414	C	Neutral	Not_aplica	Tc03v2_g015520	NA
XP_007038852.2	409	TPR	117	150	1	start lost	0.172414	C	Neutral	Not_aplica	Tc03v2_g015520	NA
XP_007038852.2	409	TPR	49	82	1	start lost	0.172414	C	Neutral	Not_aplica	Tc03v2_g015520	NA
XP_007038852.2	410	TPR	49	82	8	Missense variant	0.213115	G	Neutral	Deleterious - low confidence	Tc03v2_g015520	NA
XP_007042587.2	421	PRISE-RF	114	421	1	start lost	0.792308	C	Neutral	Not_aplica	Tc02v2_g009210	NA
XP_007042587.2	421	NAD(P)-RF	59	329	1	start lost	0.792308	C	Neutral	Not_aplica	Tc02v2_g009210	NA
XP_017970494.1	1194	Na⁺/H⁺ Exch	125	492	1	start lost	0.585938	C	Balancing selection (D > 95th percentile)	Not_aplica	Tc02v2_g026000	GO:0051179 Localization
XP_017970494.1	1194	cAMP-BD	758	894	1	start lost	0.585938	C	Balancing selection (D > 95th percentile)	Not_aplica	Tc02v2_g026000	GO:0051234 Establishment of localization
XP_017970494.1	1194	CNBD	803	886	1	start lost	0.585938	C	Balancing selection (D > 95th percentile)	Not_aplica	Tc02v2_g026000	GO:0006810 Transport
XP_017970494.1	1194	CNBD	803	886	17	Missense variant	0.764286	C	Balancing selection (D > 95th percentile)	Deleterious - low confidence	Tc02v2_g026000	GO:0055085 Transmembrane transport
XP_017970494.1	1194	CNBD	803	886	6	Missense variant	0.2	T	Balancing selection (D > 95th percentile)	Deleterious - low confidence	Tc02v2_g026000	GO:0006812 Monoatomic cation transport
XP_017970494.1	1194	CNBD	803	886	21	Missense variant	0.207143	T	Balancing selection (D > 95th percentile)	Deleterious - low confidence	Tc02v2_g026000	GO:0006811 Monoatomic ion transport
XP_017970494.1	1194	CNBD	803	886	18	Missense variant	0.71831	T	Balancing selection (D > 95th percentile)	Deleterious - low confidence	Tc02v2_g026000
XP_017971484.1	888	PKinase	676	888	1	start lost	0.584615	A	Balancing selection (D > 95th percentile)	Not_aplica	Tc02v2_g012540	GO:0044237 Cellular metabolic process
XP_017971484.1	888	PAS	488	587	1	start lost	0.584615	A	Balancing selection (D > 95th percentile)	Not_aplica	Tc02v2_g012540	GO:0006796 Phosphate-containing compound metabolic process
XP_017971484.1	888	PAS	217	309	1	start lost	0.584615	A	Balancing selection (D > 95th percentile)	Not_aplica	Tc02v2_g012540	GO:0006793 Phosphorus metabolic process
XP_017971484.1	888	PAS	217	309	224	Missense variant	0.311475	A	Balancing selection (D > 95th percentile)	TOLERATED	Tc02v2_g012540	GO:0019538 Protein metabolic process
XP_017971484.1	888	PAS	217	309	146	Missense variant	0.576923	C	Balancing selection (D > 95th percentile)	Deleterious - low confidence	Tc02v2_g012540	GO:0016310 Phosphorylation
XP_017971484.1	888	PAS	217	309	26	Missense variant	0.585938	C	Balancing selection (D > 95th percentile)	TOLERATED	Tc02v2_g012540	GO:0043170 Macromolecule metabolic process
XP_017971484.1	888	PAS	217	309	55	Missense variant	0.484127	G	Balancing selection (D > 95th percentile)	TOLERATED	Tc02v2_g012540	GO:0043412 Macromolecule modification
XP_017971484.1	888	PAS	217	309	24	Missense variant	0.579365	G	Balancing selection (D > 95th percentile)	TOLERATED	Tc02v2_g012540	GO:0036211 Protein modification process
XP_017971484.1	888	PAS	217	309	77	Missense variant	0.618644	T	Balancing selection (D > 95th percentile)	TOLERATED	Tc02v2_g012540
XP_017976224.1	493	RuBisCo-AAA	329	424	1	start lost	0.6	C	Neutral	Not_aplica	Tc05v2_g003010	NA
XP_017976224.1	493	P-loop NTPase	148	351	1	start lost	0.6	C	Neutral	Not_aplica	Tc05v2_g003010	NA
XP_017976224.1	493	AAA-ATPase	183	326	1	start lost	0.6	C	Neutral	Not_aplica	Tc05v2_g003010	NA
XP_017976909.1	230	MCP/YpsA-l	81	202	1	start lost	0.34375	G	Neutral	Not_aplica	Tc05v2_g015570	NA
XP_017983591.1	222	Longin2	28	111	1	start lost	0.219697	T	Positive selection (D < 5th percentile)	Not_aplica	Tc09v2_g011380	GO:0051179 Localization
XP_017983591.1	222	Synaptobr	125	210	1	start lost	0.219697	T	Positive selection (D < 5th percentile)	Not_aplica	Tc09v2_g011380	GO:0051234 Establishment of localization
XP_017983591.1	222	Synapto_sig	145	164	1	start lost	0.219697	T	Positive selection (D < 5th percentile)	Not_aplica	Tc09v2_g011380	GO:0006810 Transport
XP_017983591.1	222	Synapto_sig	145	164	29	Missense variant	0.230159	T	Positive selection (D < 5th percentile)	TOLERATED	Tc09v2_g011380	GO:0016192 Vesicle-mediated transport
XP_017983855.1	333	Peroxidase	50	292	1	start lost	0.358333	A	Neutral	Not_aplica	Tc09v2_g010890	GO:0050896 Response to stimulus	GO:0006979 Response to oxidative stress	GO:0072593 Reactive oxygen species metabolic process	GO:0006950 Response to stress	GO:0009056 Catabolic process	GO:0042744 Hydrogen peroxide catabolic process	GO:0044248 Cellular catabolic process	GO:0042743 Hydrogen peroxide metabolic process
XP_007016442.2	158	HSP20	20	158	112	stop gained	0.207692	T	Neutral	Not_aplica	Tc09v2_g027150	NA
XP_007016442.2	158	α-Crystallin	54	157	112	stop gained	0.207692	T	Neutral	Not_aplica	Tc09v2_g027150	NA
XP_007016442.2	158	α-Crystallin	54	157	46	Missense variant	0.306452	A	Neutral	TOLERATED	Tc09v2_g027150	NA
XP_007016442.2	158	α-Crystallin	54	157	90	Missense variant	0.507692	A	Neutral	Deleterious	Tc09v2_g027150	NA
XP_007016442.2	158	α-Crystallin	54	157	125	Missense variant	0.324561	C	Neutral	TOLERATED	Tc09v2_g027150	NA
XP_007016442.2	158	α-Crystallin	54	157	100	Missense variant	0.396825	G	Neutral	TOLERATED	Tc09v2_g027150	NA
XP_007017047.2	473	PKinase	12	266	302	stop gained	0.262295	T	Neutral	Not_aplica	Tc09v2_g030370	GO:0050896 Response to stimulus
XP_007017047.2	473	NAF	310	368	302	stop gained	0.262295	T	Neutral	Not_aplica	Tc09v2_g030370	GO:0051716 Cellular response to stimulus
XP_007017047.2	473	ATP-bind	18	41	302	stop gained	0.262295	T	Neutral	Not_aplica	Tc09v2_g030370	GO:0006796 Phosphate-containing compound metabolic process	GO:0016310 Phosphorylation
XP_007017047.2	473	ATP-bind	18	41	120	Missense variant	0.25	A	Neutral	Deleterious	Tc09v2_g030370	GO:0006793 Phosphorus metabolic process	GO:0043170 Macromolecule metabolic process
XP_007017047.2	473	ATP-bind	18	41	252	Missense variant	0.230159	C	Neutral	TOLERATED	Tc09v2_g030370	GO:0007165 Signal transduction	GO:0043412 Macromolecule modification
XP_007017047.2	473	ATP-bind	18	41	302	Missense variant	0.271186	C	Neutral	TOLERATED	Tc09v2_g030370	GO:0007154 Cell communication	GO:0036211 Protein modification process
XP_007017047.2	473	ATP-bind	18	41	405	Missense variant	0.492063	G	Neutral	TOLERATED	Tc09v2_g030370	GO:0023052 Signaling	GO:0019538 Protein metabolic process
XP_007023452.2	432	NADH-OxR	98	428	71	stop gained	0.303279	A	Neutral	Not_aplica	Tc06v2_g003440	NA
XP_007023452.2	432	NADH-OxR	98	428	42	Missense variant	0.335938	G	Neutral	Deleterious - low confidence	Tc06v2_g003440	NA
XP_007037753.2	994	SWAP	412	459	41	Missense variant	0.245283	A	Positive selection (D < 5th percentile)	TOLERATED	Tc03v2_g009380	GO:0044237 Cellular metabolic process	GO:0044249 Cellular biosynthetic process
XP_007037753.2	994	SWAP	412	459	42	stop gained	0.240741	T	Positive selection (D < 5th percentile)	Not_aplica	Tc03v2_g009380	GO:0009058 Biosynthetic process	GO:0043170 Macromolecule metabolic process
XP_007042686.2	608	Coil	190	217	113	stop gained	0.761905	A	Positive selection (D < 5th percentile)	Not_aplica	Tc02v2_g009870	NA
XP_007042686.2	608	Coil	159	179	113	stop gained	0.761905	A	Positive selection (D < 5th percentile)	Not_aplica	Tc02v2_g009870	NA
XP_007042686.2	608	Coil	159	179	113	Missense variant	0.777778	G	Positive selection (D < 5th percentile)	TOLERATED	Tc02v2_g009870	NA
XP_017972740.1	518	PD-(D/E)XK	203	505	34	stop gained	0.240741	C	Neutral	Not_aplica	Tc03v2_g019800	NA
XP_017972740.1	518	PD-(D/E)XK	203	505	121	Missense variant	0.314286	C	Neutral	Deleterious - low confidence	Tc03v2_g019800	NA
XP_017972740.1	518	PD-(D/E)XK	203	505	12	Missense variant	0.25	G	Neutral	Deleterious - low confidence	Tc03v2_g019800	NA
XP_017972740.1	518	PD-(D/E)XK	203	505	63	Missense variant	0.264706	T	Neutral	TOLERATED	Tc03v2_g019800	NA
XP_017973265.1	128	Ubiquitin_7	1	72	31	stop gained	0.32	T	Neutral	Not_aplica	Tc03v2_g017080	GO:0009056 Catabolic process	GO:0030163 Protein catabolic process	GO:0019941 Modification-dependent protein catabolic process
XP_017973265.1	128	RiboL40e	77	128	31	stop gained	0.32	T	Neutral	Not_aplica	Tc03v2_g017080	GO:0044237 Cellular metabolic process	GO:0036211 Protein modification process	GO:0043632 Modification-dependent macromolecule catabolic process
XP_017973265.1	128	RiboL40e	77	128	34	Missense variant	0.3125	A	Neutral	Deleterious - low confidence	Tc03v2_g017080	GO:0009058 Biosynthetic process	GO:0051603 Proteolysis involved in protein catabolic process	GO:0043170 Macromolecule metabolic process
XP_017973265.1	128	RiboL40e	77	128	24	Missense variant	0.323529	A	Neutral	TOLERATED	Tc03v2_g017080	GO:0009057 Macromolecule catabolic process	GO:0043412 Macromolecule modification	GO:0006508 Proteolysis
XP_017973265.1	128	RiboL40e	77	128	18	Missense variant	0.333333	A	Neutral	Deleterious - low confidence	Tc03v2_g017080	GO:0019538 Protein metabolic process	GO:0044249 Cellular biosynthetic process
XP_017976290.1	696	ABCG_EPDR	44	286	327	stop gained	0.291045	A	Balancing selection (D > 95th percentile)	Not_aplica	Tc05v2_g004320	NA
XP_017976290.1	696	P-loop NTPase	70	297	327	stop gained	0.291045	A	Balancing selection (D > 95th percentile)	Not_aplica	Tc05v2_g004320	NA
XP_017976290.1	696	ABC-2-Transp	392	600	327	stop gained	0.291045	A	Balancing selection (D > 95th percentile)	Not_aplica	Tc05v2_g004320	NA
XP_017976290.1	696	ABC-Transp	80	232	327	stop gained	0.291045	A	Balancing selection (D > 95th percentile)	Not_aplica	Tc05v2_g004320	NA
XP_017976290.1	696	ABC-Transp	80	232	481	Missense variant	0.278689	A	Balancing selection (D > 95th percentile)	Deleterious	Tc05v2_g004320	NA
XP_017976290.1	696	ABC-Transp	80	232	36	Missense variant	0.293651	C	Balancing selection (D > 95th percentile)	TOLERATED	Tc05v2_g004320	NA
XP_017976290.1	696	ABC-Transp	80	232	360	Missense variant	0.348485	C	Balancing selection (D > 95th percentile)	Deleterious	Tc05v2_g004320	NA
XP_017976290.1	696	ABC-Transp	80	232	12	Missense variant	0.270492	G	Balancing selection (D > 95th percentile)	Deleterious - low confidence	Tc05v2_g004320	NA
XP_017976290.1	696	ABC-Transp	80	232	392	Missense variant	0.328358	G	Balancing selection (D > 95th percentile)	TOLERATED	Tc05v2_g004320	NA
XP_017976290.1	696	ABC-Transp	80	232	257	Missense variant	0.634328	G	Balancing selection (D > 95th percentile)	TOLERATED	Tc05v2_g004320	NA
XP_017976290.1	696	ABC-Transp	80	232	518	Missense variant	0.232759	T	Balancing selection (D > 95th percentile)	TOLERATED	Tc05v2_g004320	NA
XP_017976290.1	696	ABC-Transp	80	232	350	Missense variant	0.341667	T	Balancing selection (D > 95th percentile)	TOLERATED	Tc05v2_g004320	NA
XP_017976290.1	696	ABC-Transp	80	232	64	Missense variant	0.370968	T	Balancing selection (D > 95th percentile)	TOLERATED	Tc05v2_g004320	NA
XP_017976290.1	696	ABC-Transp	80	232	587	Missense variant	0.790323	T	Balancing selection (D > 95th percentile)	TOLERATED	Tc05v2_g004320	NA
XP_017977894.1	611	Nodulin	27	272	327	stop gained	0.388889	T	Balancing selection (D > 95th percentile)	Not_aplica	Tc05v2_g005990	GO:0051179 Localization
XP_017977894.1	611	NFD4-C	354	567	327	stop gained	0.388889	T	Balancing selection (D > 95th percentile)	Not_aplica	Tc05v2_g005990	GO:0051234 Establishment of localization
XP_017977894.1	611	NFD4-C	354	567	142	Missense variant	0.302632	A	Balancing selection (D > 95th percentile)	Deleterious	Tc05v2_g005990	GO:0006810 Transport
XP_017977894.1	611	NFD4-C	354	567	113	Missense variant	0.351852	A	Balancing selection (D > 95th percentile)	TOLERATED	Tc05v2_g005990	GO:0055085 Transmembrane transport
XP_017977894.1	611	NFD4-C	354	567	142	Missense variant	0.381579	A	Balancing selection (D > 95th percentile)	Deleterious	Tc05v2_g005990	NA
XP_017977894.1	611	NFD4-C	354	567	25	Missense variant	0.69403	A	Balancing selection (D > 95th percentile)	TOLERATED	Tc05v2_g005990	NA
XP_017977894.1	611	NFD4-C	354	567	101	Missense variant	0.326087	C	Balancing selection (D > 95th percentile)	Deleterious	Tc05v2_g005990	NA
XP_017977894.1	611	NFD4-C	354	567	131	Missense variant	0.364865	C	Balancing selection (D > 95th percentile)	Deleterious	Tc05v2_g005990	NA
XP_017977894.1	611	NFD4-C	354	567	183	Missense variant	0.515385	C	Balancing selection (D > 95th percentile)	TOLERATED	Tc05v2_g005990	NA
XP_017977894.1	611	NFD4-C	354	567	324	Missense variant	0.295082	G	Balancing selection (D > 95th percentile)	TOLERATED	Tc05v2_g005990	NA
XP_017977894.1	611	NFD4-C	354	567	324	Missense variant	0.295082	T	Balancing selection (D > 95th percentile)	TOLERATED	Tc05v2_g005990	NA
XP_017977894.1	611	NFD4-C	354	567	328	Missense variant	0.295082	T	Balancing selection (D > 95th percentile)	TOLERATED	Tc05v2_g005990	NA
XP_017977894.1	611	NFD4-C	354	567	187	Missense variant	0.323077	T	Balancing selection (D > 95th percentile)	Deleterious	Tc05v2_g005990	NA
XP_017977894.1	611	NFD4-C	354	567	318	Missense variant	0.358333	T	Balancing selection (D > 95th percentile)	TOLERATED	Tc05v2_g005990	NA
XP_017977894.1	611	NFD4-C	354	567	108	Missense variant	0.365385	T	Balancing selection (D > 95th percentile)	Deleterious	Tc05v2_g005990	NA
XP_017977894.1	611	NFD4-C	354	567	136	Missense variant	0.381579	T	Balancing selection (D > 95th percentile)	TOLERATED	Tc05v2_g005990	NA
XP_017982933.1	407	RING	50	91	20	stop gained	0.30597	T	Neutral	Not_aplica	Tc09v2_g022360	GO:0009056 Catabolic process	GO:0048856 Anatomical structure development	GO:0009057 Macromolecule catabolic process	GO:0032502 Developmental process	GO:0032501 Multicellular organismal process	GO:0019538 Protein metabolic process	GO:0007275 Multicellular organism development	GO:0030163 Protein catabolic process	GO:0051603 Proteolysis involved in protein catabolic process	GO:0006508 Proteolysis	GO:0048229 Gametophyte development
XP_017984892.1	482	UGT/GlycPhos	78	480	483	stop gained	0.1875	G	Positive selection (D < 5th percentile)	Not_aplica	Tc10v2_g009700	NA
XP_017984892.1	482	UGT/GlycPhos	78	480	70	Missense variant	0.689394	C	Positive selection (D < 5th percentile)	TOLERATED	Tc10v2_g009700	NA
XP_007041139.2	246	GLTP	41	246	74	Missense variant	0.266667	A	Neutral	Deleterious	Tc02v2_g001040	GO:0051179 Localization	GO:0071840 Cellular component organization or biogenesis
XP_007041139.2	246	GLTP	73	210	73	Missense variant	0.266667	G	Neutral	TOLERATED	Tc02v2_g001040	GO:0051234 Establishment of localization	GO:0016043 Cellular component organization
XP_007041139.2	246	ACD11	42	246	6	Missense variant	0.258621	T	Neutral	Deleterious - low confidence	Tc02v2_g001040	GO:0006810 Transport	GO:0061024 Membrane organization
XP_007041139.2	246	ACD11	42	246	1	start lost	0.241935	A	Neutral	Not_aplica	Tc02v2_g001040	GO:0033036 Macromolecule localization

## Sheet: Table S17
	Table S17 Single nucleotide polymorphisms (SNPs) identified in genes colocalized with quantitative trait loci (QTLs) associated with resistance to Phytophthora spp. and witches’ broom disease in T. cacao.
Chromosome	Gene start position	Gene end position	SNP position	Gene ID	Alternate allele	Alternate allele frequency	Protein accession	Locus ID	QTL identifier	QTL start position (bp)	QTL end position (bp)
NC_030857.1	1479866	1480074	1479881	Tc08v2_g002810	A	0	XP_017981297.1	LOC18591457	AKAprrHCHR8	1022182	2251917
NC_030857.1	1479866	1480074	1479882	Tc08v2_g002810	T	0	XP_017981297.1	LOC18591457	AKAprrHCHR8	1022182	2251917
NC_030851.1	1898802	1899149	1899021	Tc02v2_g002740	A	0	XP_007041472.1	LOC18607319	AKAprrICS95CHR2	703843	2174093
NC_030857.1	2104813	2104923	2104893	Tc08v2_g003930	T	0	XP_007017846.1	LOC18591579	AKAprrHCHR8	1022182	2251917
NC_030859.1	19749011	19749073	19749065	Tc10v2_g012460	A	0	XP_017984997.1	LOC18587290	BROphy3CHR10	16000000	20882174
NC_030859.1	17988757	17989806	17989521	Tc10v2_g011260	G	0.00595238	XP_007010821.2	LOC18587086	BROphy3CHR10	16000000	20882174
NC_030853.1	599881	600323	600008	Tc04v2_g000820	G	0.00649351	XP_017975916.1	LOC18600761	BROphy1CHR4	1	1000000
NC_030857.1	2160787	2161755	2161459	Tc08v2_g004040	A	0.00675676	XP_007017867.2	LOC18591592	AKAprrHCHR8	1022182	2251917
NC_030857.1	1519268	1520125	1519398	Tc08v2_g002860	T	0.00704225	XP_007017655.1	LOC18591463	AKAprrHCHR8	1022182	2251917
NC_030852.1	35843577	35843906	35843773	Tc03v2_g026350	T	0.00704225	XP_007040782.2	LOC18606866	AKAfolICS100CHR3	35179055	36293379
NC_030855.1	248408	249259	248748	Tc06v2_g000100	T	0.00724638	XP_007022863.2	LOC18595036	BARq1BPPctCHR6	219626	689235
NC_030851.1	1763200	1763442	1763275	Tc02v2_g002560	C	0.00746269	XP_007041440.1	LOC18607297	AKAprrICS95CHR2	703843	2174093
NC_030857.1	2509991	2511212	2510485	Tc08v2_g004750	A	0.00746269	XP_007017971.2	LOC18591665	BROphy2CHR8	2391280	4552442
NC_030853.1	31831	31883	31836	Tc04v2_g000010	C	0.00757576	XP_017975453.1	LOC18600669	BROphy1CHR4	1	1000000
NC_030853.1	599881	600323	599908	Tc04v2_g000820	T	0.00757576	XP_017975916.1	LOC18600761	BROphy1CHR4	1	1000000
NC_030851.1	750477	750830	750625	Tc02v2_g001060	C	0.00757576	XP_017970678.1	LOC18607090	AKAprrICS95CHR2	703843	2174093
NC_030853.1	843348	843630	843468	Tc04v2_g001140	G	0.00757576	XP_017974136.1	LOC18600801	BROphy1CHR4	1	1000000
NC_030855.1	461199	463739	461248	Tc06v2_g000390	A	0.00769231	XP_007022934.2	LOC18595077	BARq1BPPctCHR6	219626	689235
NC_030855.1	461199	463739	462345	Tc06v2_g000390	C	0.00769231	XP_007022934.2	LOC18595077	BARq1BPPctCHR6	219626	689235
NC_030859.1	18726244	18726444	18726383	Tc10v2_g011790	G	0.00769231	XP_007010928.1	LOC18587171	BROphy3CHR10	16000000	20882174
NC_030852.1	36288452	36288757	36288728	Tc03v2_g027240	A	0.00769231	XP_017972797.1	LOC18606960	AKAfolICS100CHR3	35179055	36293379
NC_030853.1	327257	327364	327279	Tc04v2_g000330	G	0.0078125	XP_007031388.2	LOC18600713	BROphy1CHR4	1	1000000
NC_030855.1	461199	463739	461204	Tc06v2_g000390	C	0.0078125	XP_007022934.2	LOC18595077	BARq1BPPctCHR6	219626	689235
NC_030857.1	1519268	1520125	1519643	Tc08v2_g002860	T	0.0078125	XP_007017655.1	LOC18591463	AKAprrHCHR8	1022182	2251917
NC_030851.1	1793157	1795716	1794175	Tc02v2_g002630	C	0.0078125	XP_007041450.2	LOC18607302	AKAprrICS95CHR2	703843	2174093
NC_030852.1	35296657	35296860	35296792	Tc03v2_g025410	C	0.0078125	XP_007040602.1	LOC18606754	AKAfolICS100CHR3	35179055	36293379
NC_030857.1	1657305	1660721	1657461	Tc08v2_g003150	A	0.00793651	XP_007017699.2	LOC18591492	AKAprrHCHR8	1022182	2251917
NC_030857.1	1657305	1660721	1657653	Tc08v2_g003150	T	0.00793651	XP_007017699.2	LOC18591492	AKAprrHCHR8	1022182	2251917
NC_030857.1	1657305	1660721	1657660	Tc08v2_g003150	T	0.00793651	XP_007017699.2	LOC18591492	AKAprrHCHR8	1022182	2251917
NC_030857.1	2160787	2161755	2161532	Tc08v2_g004040	A	0.00793651	XP_007017867.2	LOC18591592	AKAprrHCHR8	1022182	2251917
NC_030857.1	2789587	2789663	2789656	Tc08v2_g005270	C	0.00793651	XP_017981222.1	LOC18591721	BROphy2CHR8	2391280	4552442
NC_030852.1	35790851	35791419	35791394	Tc03v2_g026250	A	0.00793651	XP_007040771.1	LOC18606857	AKAfolICS100CHR3	35179055	36293379
NC_030852.1	35990103	35990768	35990362	Tc03v2_g026630	G	0.00793651	XP_007040835.2	LOC18606897	AKAfolICS100CHR3	35179055	36293379
NC_030857.1	1657305	1660721	1658246	Tc08v2_g003150	A	0.00806452	XP_007017699.2	LOC18591492	AKAprrHCHR8	1022182	2251917
NC_030857.1	2509991	2511212	2510794	Tc08v2_g004750	T	0.00806452	XP_007017971.2	LOC18591665	BROphy2CHR8	2391280	4552442
NC_030857.1	2514387	2515605	2515569	Tc08v2_g004760	C	0.00806452	XP_007017972.2	LOC18591666	BROphy2CHR8	2391280	4552442
NC_030851.1	734937	735785	735577	Tc02v2_g001020	T	0.00819672	XP_017971108.1	LOC18607086	AKAprrICS95CHR2	703843	2174093
NC_030857.1	1377979	1378282	1377988	Tc08v2_g002590	T	0.00819672	XP_007017611.1	LOC18591435	AKAprrHCHR8	1022182	2251917
NC_030851.1	1716175	1716663	1716657	Tc02v2_g002450	T	0.00819672	XP_017970203.1	LOC108660581	AKAprrICS95CHR2	703843	2174093
NC_030857.1	2509991	2511212	2510822	Tc08v2_g004750	A	0.00819672	XP_007017971.2	LOC18591665	BROphy2CHR8	2391280	4552442
NC_030855.1	4160614	4160921	4160777	Tc06v2_g003370	T	0.00819672	XP_017979341.1	LOC18595439	AKAprrICS100CHR62	3494620	5000000
NC_030851.1	8647126	8647562	8647495	Tc02v2_g013670	A	0.00819672	XP_007043322.2	LOC18608518	BARq2BPPcCHR2	8244114	9182779
NC_030853.1	252977	253954	253906	Tc04v2_g000210	A	0.00833333	XP_007031366.1	LOC18600699	BROphy1CHR4	1	1000000
NC_030855.1	452632	453022	452650	Tc06v2_g000370	T	0.00833333	XP_007022927.2	LOC18595074	BARq1BPPctCHR6	219626	689235
NC_030855.1	461199	463739	461375	Tc06v2_g000390	T	0.00833333	XP_007022934.2	LOC18595077	BARq1BPPctCHR6	219626	689235
NC_030855.1	461199	463739	462055	Tc06v2_g000390	A	0.00833333	XP_007022934.2	LOC18595077	BARq1BPPctCHR6	219626	689235
NC_030853.1	599881	600323	599948	Tc04v2_g000820	T	0.00833333	XP_017975916.1	LOC18600761	BROphy1CHR4	1	1000000
NC_030853.1	838203	838258	838219	Tc04v2_g001130	A	0.00833333	XP_007031532.1	LOC18600800	BROphy1CHR4	1	1000000
NC_030857.1	1488887	1489481	1489409	Tc08v2_g002820	T	0.00833333	XP_007017645.2	LOC18591458	AKAprrHCHR8	1022182	2251917
NC_030857.1	1563948	1564508	1564002	Tc08v2_g002970	T	0.00833333	XP_007017672.2	LOC18591475	AKAprrHCHR8	1022182	2251917
NC_030855.1	4160614	4160921	4160872	Tc06v2_g003370	T	0.00833333	XP_017979341.1	LOC18595439	AKAprrICS100CHR62	3494620	5000000
NC_030859.1	16016538	16018038	16017466	Tc10v2_g010150	T	0.00833333	XP_017984736.1	LOC18586933	BROphy3CHR10	16000000	20882174
NC_030859.1	16778863	16779621	16779114	Tc10v2_g010520	A	0.00833333	XP_007010663.1	LOC18586977	BROphy3CHR10	16000000	20882174
NC_030859.1	17695937	17696372	17696189	Tc10v2_g011010	T	0.00833333	XP_007010774.1	LOC18587059	BROphy3CHR10	16000000	20882174
NC_030853.1	252977	253954	253059	Tc04v2_g000210	T	0.00847458	XP_007031366.1	LOC18600699	BROphy1CHR4	1	1000000
NC_030851.1	734937	735785	735706	Tc02v2_g001020	A	0.00847458	XP_017971108.1	LOC18607086	AKAprrICS95CHR2	703843	2174093
NC_030853.1	843348	843630	843606	Tc04v2_g001140	A	0.00847458	XP_017974136.1	LOC18600801	BROphy1CHR4	1	1000000
NC_030857.1	1063115	1063312	1063188	Tc08v2_g001930	A	0.00847458	XP_007017500.2	LOC18591361	AKAprrHCHR8	1022182	2251917
NC_030857.1	1200698	1202245	1200926	Tc08v2_g002200	A	0.00847458	XP_007017550.1	LOC18591390	AKAprrHCHR8	1022182	2251917
NC_030857.1	1200698	1202245	1200927	Tc08v2_g002200	C	0.00847458	XP_007017550.1	LOC18591390	AKAprrHCHR8	1022182	2251917
NC_030857.1	1571731	1571871	1571861	Tc08v2_g002980	T	0.00847458	XP_007017673.1	LOC18591476	AKAprrHCHR8	1022182	2251917
NC_030857.1	1952259	1952666	1952659	Tc08v2_g003680	T	0.00847458	XP_017981564.1	LOC18591554	AKAprrHCHR8	1022182	2251917
NC_030855.1	3558105	3558158	3558131	Tc06v2_g003070	T	0.00847458	XP_017978099.1	LOC18595399	AKAprrICS100CHR62	3494620	5000000
NC_030859.1	17399500	17399723	17399654	Tc10v2_g010860	T	0.00847458	XP_017984846.1	LOC18587036	BROphy3CHR10	16000000	20882174
NC_030859.1	17988757	17989806	17988893	Tc10v2_g011260	G	0.00847458	XP_007010821.2	LOC18587086	BROphy3CHR10	16000000	20882174
NC_030859.1	18568547	18571498	18568614	Tc10v2_g011700	A	0.00847458	XP_007010914.2	LOC18587159	BROphy3CHR10	16000000	20882174
NC_030852.1	35618087	35618850	35618639	Tc03v2_g025950	A	0.00847458	XP_017973698.1	LOC18606825	AKAfolICS100CHR3	35179055	36293379
NC_030852.1	35674670	35675632	35675160	Tc03v2_g026080	T	0.00847458	XP_017973240.1	LOC18606837	AKAfolICS100CHR3	35179055	36293379
NC_030852.1	35990103	35990768	35990235	Tc03v2_g026630	T	0.00847458	XP_007040835.2	LOC18606897	AKAfolICS100CHR3	35179055	36293379
NC_030852.1	35990103	35990768	35990298	Tc03v2_g026630	G	0.00847458	XP_007040835.2	LOC18606897	AKAfolICS100CHR3	35179055	36293379
NC_030855.1	461199	463739	461378	Tc06v2_g000390	T	0.00862069	XP_007022934.2	LOC18595077	BARq1BPPctCHR6	219626	689235
NC_030855.1	461199	463739	461465	Tc06v2_g000390	G	0.00862069	XP_007022934.2	LOC18595077	BARq1BPPctCHR6	219626	689235
NC_030851.1	711604	712018	711688	Tc02v2_g001000	A	0.00862069	XP_007041134.2	LOC18607084	AKAprrICS95CHR2	703843	2174093
NC_030851.1	716193	717944	716665	Tc02v2_g001010	G	0.00862069	XP_017971109.1	LOC18607085	AKAprrICS95CHR2	703843	2174093
NC_030851.1	734937	735785	735240	Tc02v2_g001020	C	0.00862069	XP_017971108.1	LOC18607086	AKAprrICS95CHR2	703843	2174093
NC_030851.1	740325	740639	740331	Tc02v2_g001040	T	0.00862069	XP_007041139.2	LOC18607088	AKAprrICS95CHR2	703843	2174093
NC_030857.1	2552408	2552776	2552757	Tc08v2_g004850	C	0.00862069	XP_007017989.1	LOC18591677	BROphy2CHR8	2391280	4552442
NC_030855.1	3822046	3823395	3822176	Tc06v2_g003300	G	0.00862069	XP_017977979.1	LOC18595426	AKAprrICS100CHR62	3494620	5000000
NC_030855.1	4213276	4213610	4213564	Tc06v2_g003440	A	0.00862069	XP_007023452.2	LOC18595444	AKAprrICS100CHR62	3494620	5000000
NC_030851.1	8436625	8436744	8436671	Tc02v2_g013400	T	0.00862069	XP_017971313.1	LOC18608490	BARq2BPPcCHR2	8244114	9182779
NC_030859.1	16778863	16779621	16779086	Tc10v2_g010520	A	0.00862069	XP_007010663.1	LOC18586977	BROphy3CHR10	16000000	20882174
NC_030859.1	17695937	17696372	17696245	Tc10v2_g011010	C	0.00862069	XP_007010774.1	LOC18587059	BROphy3CHR10	16000000	20882174
NC_030859.1	18568547	18571498	18571170	Tc10v2_g011700	G	0.00862069	XP_007010914.2	LOC18587159	BROphy3CHR10	16000000	20882174
NC_030859.1	20534647	20534936	20534789	Tc10v2_g013110	C	0.00862069	XP_017984163.1	LOC18587367	BROphy3CHR10	16000000	20882174
NC_030852.1	36236544	36238010	36236698	Tc03v2_g027090	C	0.00862069	XP_007040917.2	LOC18606945	AKAfolICS100CHR3	35179055	36293379
NC_030855.1	461199	463739	462119	Tc06v2_g000390	T	0.00877193	XP_007022934.2	LOC18595077	BARq1BPPctCHR6	219626	689235
NC_030855.1	461199	463739	462919	Tc06v2_g000390	A	0.00877193	XP_007022934.2	LOC18595077	BARq1BPPctCHR6	219626	689235
NC_030855.1	461199	463739	463231	Tc06v2_g000390	T	0.00877193	XP_007022934.2	LOC18595077	BARq1BPPctCHR6	219626	689235
NC_030853.1	927838	929073	927967	Tc04v2_g001280	A	0.00877193	XP_017975736.1	LOC18600813	BROphy1CHR4	1	1000000
NC_030851.1	1927213	1927580	1927465	Tc02v2_g002790	C	0.00877193	XP_007041478.2	LOC18607324	AKAprrICS95CHR2	703843	2174093
NC_030857.1	1952259	1952666	1952372	Tc08v2_g003680	A	0.00877193	XP_017981564.1	LOC18591554	AKAprrHCHR8	1022182	2251917
NC_030857.1	2150885	2151218	2150924	Tc08v2_g004020	A	0.00877193	XP_007017861.2	LOC18591589	AKAprrHCHR8	1022182	2251917
NC_030857.1	2429106	2429397	2429243	Tc08v2_g004570	C	0.00877193	XP_017981404.1	LOC18591648	BROphy2CHR8	2391280	4552442
NC_030857.1	2545299	2546582	2546539	Tc08v2_g004840	A	0.00877193	XP_007017987.2	LOC18591676	BROphy2CHR8	2391280	4552442
NC_030855.1	3754644	3755468	3755192	Tc06v2_g003240	A	0.00877193	XP_007023408.1	LOC18595418	AKAprrICS100CHR62	3494620	5000000
NC_030855.1	4318733	4318849	4318815	Tc06v2_g003580	C	0.00877193	XP_017978918.1	LOC18595461	AKAprrICS100CHR62	3494620	5000000
NC_030851.1	8436625	8436744	8436686	Tc02v2_g013400	A	0.00877193	XP_017971313.1	LOC18608490	BARq2BPPcCHR2	8244114	9182779
NC_030851.1	8440547	8440758	8440727	Tc02v2_g013420	A	0.00877193	XP_007043279.2	LOC18608493	BARq2BPPcCHR2	8244114	9182779
NC_030859.1	16016538	16018038	16017097	Tc10v2_g010150	T	0.00877193	XP_017984736.1	LOC18586933	BROphy3CHR10	16000000	20882174
NC_030852.1	35949677	35949955	35949714	Tc03v2_g026560	C	0.00877193	XP_017973635.1	LOC18606889	AKAfolICS100CHR3	35179055	36293379
NC_030855.1	248408	249259	248603	Tc06v2_g000100	T	0.00892857	XP_007022863.2	LOC18595036	BARq1BPPctCHR6	219626	689235
NC_030853.1	465664	465930	465888	Tc04v2_g000590	C	0.00892857	XP_017975788.1	LOC18600739	BROphy1CHR4	1	1000000
NC_030853.1	533910	533993	533947	Tc04v2_g000680	G	0.00892857	XP_007031449.1	LOC18600748	BROphy1CHR4	1	1000000
NC_030853.1	927838	929073	928695	Tc04v2_g001280	T	0.00892857	XP_017975736.1	LOC18600813	BROphy1CHR4	1	1000000
NC_030851.1	1710457	1710927	1710567	Tc02v2_g002430	C	0.00892857	XP_007041422.1	LOC18607284	AKAprrICS95CHR2	703843	2174093
NC_030851.1	1793157	1795716	1795400	Tc02v2_g002630	A	0.00892857	XP_007041450.2	LOC18607302	AKAprrICS95CHR2	703843	2174093
NC_030851.1	1807050	1807160	1807068	Tc02v2_g002660	A	0.00892857	XP_007041457.2	LOC18607306	AKAprrICS95CHR2	703843	2174093
NC_030851.1	1927213	1927580	1927555	Tc02v2_g002790	T	0.00892857	XP_007041478.2	LOC18607324	AKAprrICS95CHR2	703843	2174093
NC_030857.1	2429106	2429397	2429174	Tc08v2_g004570	C	0.00892857	XP_017981404.1	LOC18591648	BROphy2CHR8	2391280	4552442
NC_030857.1	2514387	2515605	2514682	Tc08v2_g004760	A	0.00892857	XP_007017972.2	LOC18591666	BROphy2CHR8	2391280	4552442
NC_030857.1	2545299	2546582	2545372	Tc08v2_g004840	G	0.00892857	XP_007017987.2	LOC18591676	BROphy2CHR8	2391280	4552442
NC_030857.1	2545299	2546582	2546542	Tc08v2_g004840	C	0.00892857	XP_007017987.2	LOC18591676	BROphy2CHR8	2391280	4552442
NC_030857.1	2545299	2546582	2546554	Tc08v2_g004840	T	0.00892857	XP_007017987.2	LOC18591676	BROphy2CHR8	2391280	4552442
NC_030855.1	349409	350155	349485	Tc06v2_g000230	C	0.00909091	XP_017978825.1	LOC18595057	BARq1BPPctCHR6	219626	689235
NC_030855.1	461199	463739	462325	Tc06v2_g000390	A	0.00909091	XP_007022934.2	LOC18595077	BARq1BPPctCHR6	219626	689235
NC_030855.1	461199	463739	463189	Tc06v2_g000390	C	0.00909091	XP_007022934.2	LOC18595077	BARq1BPPctCHR6	219626	689235
NC_030851.1	878097	878261	878102	Tc02v2_g001280	C	0.00909091	XP_007041174.1	LOC18607113	AKAprrICS95CHR2	703843	2174093
NC_030851.1	1613332	1613480	1613365	Tc02v2_g002160	T	0.00909091	XP_007041378.1	LOC18607255	AKAprrICS95CHR2	703843	2174093
NC_030851.1	1793157	1795716	1793162	Tc02v2_g002630	T	0.00909091	XP_007041450.2	LOC18607302	AKAprrICS95CHR2	703843	2174093
NC_030857.1	2160787	2161755	2161091	Tc08v2_g004040	G	0.00909091	XP_007017867.2	LOC18591592	AKAprrHCHR8	1022182	2251917
NC_030851.1	8594632	8595215	8594986	Tc02v2_g013620	T	0.00909091	XP_017971232.1	LOC18608512	BARq2BPPcCHR2	8244114	9182779
NC_030859.1	17695937	17696372	17696236	Tc10v2_g011010	G	0.00909091	XP_007010774.1	LOC18587059	BROphy3CHR10	16000000	20882174
NC_030859.1	17811429	17811770	17811679	Tc10v2_g011120	T	0.00909091	XP_017984921.1	LOC18587073	BROphy3CHR10	16000000	20882174
NC_030852.1	35295892	35296085	35295977	Tc03v2_g025400	A	0.00909091	XP_007040597.1	LOC18606753	AKAfolICS100CHR3	35179055	36293379
NC_030852.1	35848079	35848411	35848364	Tc03v2_g026360	G	0.00909091	XP_007040784.2	LOC18606867	AKAfolICS100CHR3	35179055	36293379
NC_030855.1	461199	463739	463339	Tc06v2_g000390	T	0.00925926	XP_007022934.2	LOC18595077	BARq1BPPctCHR6	219626	689235
NC_030853.1	692607	692754	692682	Tc04v2_g000980	A	0.00925926	XP_007031496.1	LOC18600778	BROphy1CHR4	1	1000000
NC_030851.1	734937	735785	735742	Tc02v2_g001020	A	0.00925926	XP_017971108.1	LOC18607086	AKAprrICS95CHR2	703843	2174093
NC_030853.1	843348	843630	843413	Tc04v2_g001140	T	0.00925926	XP_017974136.1	LOC18600801	BROphy1CHR4	1	1000000
NC_030853.1	927838	929073	928789	Tc04v2_g001280	T	0.00925926	XP_017975736.1	LOC18600813	BROphy1CHR4	1	1000000
NC_030857.1	1657305	1660721	1658790	Tc08v2_g003150	T	0.00925926	XP_007017699.2	LOC18591492	AKAprrHCHR8	1022182	2251917
NC_030851.1	1927213	1927580	1927367	Tc02v2_g002790	T	0.00925926	XP_007041478.2	LOC18607324	AKAprrICS95CHR2	703843	2174093
NC_030855.1	3754644	3755468	3755003	Tc06v2_g003240	A	0.00925926	XP_007023408.1	LOC18595418	AKAprrICS100CHR62	3494620	5000000
NC_030855.1	4213276	4213610	4213606	Tc06v2_g003440	T	0.00925926	XP_007023452.2	LOC18595444	AKAprrICS100CHR62	3494620	5000000
NC_030851.1	8420797	8421063	8420939	Tc02v2_g013350	A	0.00925926	XP_017971287.1	LOC18608485	BARq2BPPcCHR2	8244114	9182779
NC_030855.1	349409	350155	349635	Tc06v2_g000230	A	0.00943396	XP_017978825.1	LOC18595057	BARq1BPPctCHR6	219626	689235
NC_030855.1	461199	463739	463211	Tc06v2_g000390	G	0.00943396	XP_007022934.2	LOC18595077	BARq1BPPctCHR6	219626	689235
NC_030857.1	1926137	1926405	1926176	Tc08v2_g003620	A	0.00943396	XP_007017793.2	LOC18591546	AKAprrHCHR8	1022182	2251917
NC_030857.1	2545299	2546582	2546530	Tc08v2_g004840	T	0.00943396	XP_007017987.2	LOC18591676	BROphy2CHR8	2391280	4552442
NC_030855.1	3822046	3823395	3822778	Tc06v2_g003300	T	0.00943396	XP_017977979.1	LOC18595426	AKAprrICS100CHR62	3494620	5000000
NC_030859.1	16778863	16779621	16779177	Tc10v2_g010520	T	0.00943396	XP_007010663.1	LOC18586977	BROphy3CHR10	16000000	20882174
NC_030852.1	35790851	35791419	35790866	Tc03v2_g026250	A	0.00943396	XP_007040771.1	LOC18606857	AKAfolICS100CHR3	35179055	36293379
NC_030852.1	36240560	36240976	36240730	Tc03v2_g027100	T	0.00943396	XP_007040918.2	LOC18606946	AKAfolICS100CHR3	35179055	36293379
NC_030851.1	8826792	8827028	8826843	Tc02v2_g013840	T	0.00961538	XP_017971250.1	LOC18608537	BARq2BPPcCHR2	8244114	9182779
NC_030857.1	2545299	2546582	2546533	Tc08v2_g004840	G	0.00980392	XP_007017987.2	LOC18591676	BROphy2CHR8	2391280	4552442
NC_030851.1	8527686	8528040	8527835	Tc02v2_g013560	A	0.00980392	XP_007043300.1	LOC18608506	BARq2BPPcCHR2	8244114	9182779
NC_030852.1	35848079	35848411	35848308	Tc03v2_g026360	C	0.00980392	XP_007040784.2	LOC18606867	AKAfolICS100CHR3	35179055	36293379
NC_030851.1	716193	717944	717689	Tc02v2_g001010	G	0.01	XP_017971109.1	LOC18607085	AKAprrICS95CHR2	703843	2174093
NC_030857.1	1657305	1660721	1659232	Tc08v2_g003150	C	0.01	XP_007017699.2	LOC18591492	AKAprrHCHR8	1022182	2251917
NC_030857.1	2033008	2033071	2033035	Tc08v2_g003840	G	0.01	XP_017981214.1	LOC18591569	AKAprrHCHR8	1022182	2251917
NC_030851.1	1020084	1020326	1020217	Tc02v2_g001560	T	0.0102041	XP_007041230.2	LOC18607147	AKAprrICS95CHR2	703843	2174093
NC_030851.1	1793157	1795716	1794456	Tc02v2_g002630	G	0.0102041	XP_007041450.2	LOC18607302	AKAprrICS95CHR2	703843	2174093
NC_030857.1	2033008	2033071	2033044	Tc08v2_g003840	A	0.0102041	XP_017981214.1	LOC18591569	AKAprrHCHR8	1022182	2251917
NC_030851.1	8514854	8515151	8515094	Tc02v2_g013540	C	0.0104167	XP_007043296.2	LOC18608504	BARq2BPPcCHR2	8244114	9182779
NC_030851.1	1729247	1729311	1729277	Tc02v2_g002490	T	0.0108696	XP_007041430.2	LOC18607290	AKAprrICS95CHR2	703843	2174093
NC_030851.1	1729247	1729311	1729251	Tc02v2_g002490	T	0.0113636	XP_007041430.2	LOC18607290	AKAprrICS95CHR2	703843	2174093
NC_030857.1	1657305	1660721	1657777	Tc08v2_g003150	G	0.0140845	XP_007017699.2	LOC18591492	AKAprrHCHR8	1022182	2251917
NC_030855.1	4160614	4160921	4160618	Tc06v2_g003370	A	0.0144928	XP_017979341.1	LOC18595439	AKAprrICS100CHR62	3494620	5000000
NC_030855.1	4160614	4160921	4160620	Tc06v2_g003370	G	0.0144928	XP_017979341.1	LOC18595439	AKAprrICS100CHR62	3494620	5000000
NC_030851.1	8826792	8827028	8826936	Tc02v2_g013840	A	0.0144928	XP_017971250.1	LOC18608537	BARq2BPPcCHR2	8244114	9182779
NC_030859.1	18726244	18726444	18726380	Tc10v2_g011790	G	0.0149254	XP_007010928.1	LOC18587171	BROphy3CHR10	16000000	20882174
NC_030859.1	19073687	19073845	19073726	Tc10v2_g012110	A	0.0151515	XP_017984778.1	LOC18587219	BROphy3CHR10	16000000	20882174
NC_030851.1	1793157	1795716	1793379	Tc02v2_g002630	T	0.015625	XP_007041450.2	LOC18607302	AKAprrICS95CHR2	703843	2174093
NC_030857.1	1457554	1458000	1457792	Tc08v2_g002750	A	0.015873	XP_007017632.2	LOC18591451	AKAprrHCHR8	1022182	2251917
NC_030851.1	1712824	1713309	1713180	Tc02v2_g002440	G	0.015873	XP_017970641.1	LOC18607285	AKAprrICS95CHR2	703843	2174093
NC_030859.1	18726244	18726444	18726279	Tc10v2_g011790	G	0.015873	XP_007010928.1	LOC18587171	BROphy3CHR10	16000000	20882174
NC_030859.1	16638491	16638861	16638743	Tc10v2_g010420	T	0.016129	XP_017985087.1	LOC18586967	BROphy3CHR10	16000000	20882174
NC_030857.1	2509991	2511212	2510375	Tc08v2_g004750	T	0.0163934	XP_007017971.2	LOC18591665	BROphy2CHR8	2391280	4552442
NC_030855.1	461199	463739	463499	Tc06v2_g000390	A	0.0166667	XP_007022934.2	LOC18595077	BARq1BPPctCHR6	219626	689235
NC_030853.1	673069	673647	673269	Tc04v2_g000940	A	0.0166667	XP_007031492.1	LOC18600775	BROphy1CHR4	1	1000000
NC_030857.1	2514387	2515605	2515111	Tc08v2_g004760	T	0.0166667	XP_007017972.2	LOC18591666	BROphy2CHR8	2391280	4552442
NC_030859.1	16016538	16018038	16016683	Tc10v2_g010150	T	0.0166667	XP_017984736.1	LOC18586933	BROphy3CHR10	16000000	20882174
NC_030855.1	349409	350155	349587	Tc06v2_g000230	C	0.0169492	XP_017978825.1	LOC18595057	BARq1BPPctCHR6	219626	689235
NC_030851.1	881781	881851	881848	Tc02v2_g001290	T	0.0169492	XP_017969997.1	LOC18607114	AKAprrICS95CHR2	703843	2174093
NC_030855.1	3748318	3749139	3748386	Tc06v2_g003230	A	0.0169492	XP_007023406.2	LOC18595416	AKAprrICS100CHR62	3494620	5000000
NC_030859.1	17695937	17696372	17696321	Tc10v2_g011010	G	0.0169492	XP_007010774.1	LOC18587059	BROphy3CHR10	16000000	20882174
NC_030853.1	609893	610084	609928	Tc04v2_g000840	A	0.0172414	XP_007031477.2	LOC18600763	BROphy1CHR4	1	1000000
NC_030857.1	1867136	1867695	1867619	Tc08v2_g003510	C	0.0172414	XP_007017768.1	LOC18591531	AKAprrHCHR8	1022182	2251917
NC_030851.1	1927213	1927580	1927564	Tc02v2_g002790	G	0.0172414	XP_007041478.2	LOC18607324	AKAprrICS95CHR2	703843	2174093
NC_030857.1	2514387	2515605	2515016	Tc08v2_g004760	C	0.0172414	XP_007017972.2	LOC18591666	BROphy2CHR8	2391280	4552442
NC_030855.1	4213276	4213610	4213553	Tc06v2_g003440	T	0.0172414	XP_007023452.2	LOC18595444	AKAprrICS100CHR62	3494620	5000000
NC_030851.1	716193	717944	716595	Tc02v2_g001010	A	0.0175439	XP_017971109.1	LOC18607085	AKAprrICS95CHR2	703843	2174093
NC_030851.1	740325	740639	740394	Tc02v2_g001040	A	0.0175439	XP_007041139.2	LOC18607088	AKAprrICS95CHR2	703843	2174093
NC_030851.1	1710457	1710927	1710848	Tc02v2_g002430	C	0.0175439	XP_007041422.1	LOC18607284	AKAprrICS95CHR2	703843	2174093
NC_030851.1	1927213	1927580	1927537	Tc02v2_g002790	T	0.0175439	XP_007041478.2	LOC18607324	AKAprrICS95CHR2	703843	2174093
NC_030855.1	3748318	3749139	3748344	Tc06v2_g003230	T	0.0175439	XP_007023406.2	LOC18595416	AKAprrICS100CHR62	3494620	5000000
NC_030855.1	4213276	4213610	4213520	Tc06v2_g003440	T	0.0175439	XP_007023452.2	LOC18595444	AKAprrICS100CHR62	3494620	5000000
NC_030852.1	35674670	35675632	35675408	Tc03v2_g026080	G	0.0175439	XP_017973240.1	LOC18606837	AKAfolICS100CHR3	35179055	36293379
NC_030851.1	1725846	1725970	1725940	Tc02v2_g002480	G	0.0178571	XP_007041427.2	LOC18607289	AKAprrICS95CHR2	703843	2174093
NC_030851.1	1927213	1927580	1927574	Tc02v2_g002790	A	0.0178571	XP_007041478.2	LOC18607324	AKAprrICS95CHR2	703843	2174093
NC_030857.1	2850503	2850767	2850507	Tc08v2_g005380	G	0.0178571	XP_017981434.1	LOC18591733	BROphy2CHR8	2391280	4552442
NC_030859.1	16016538	16018038	16017987	Tc10v2_g010150	A	0.0178571	XP_017984736.1	LOC18586933	BROphy3CHR10	16000000	20882174
NC_030859.1	18568547	18571498	18569920	Tc10v2_g011700	C	0.0178571	XP_007010914.2	LOC18587159	BROphy3CHR10	16000000	20882174
NC_030853.1	252977	253954	253380	Tc04v2_g000210	G	0.0181818	XP_007031366.1	LOC18600699	BROphy1CHR4	1	1000000
NC_030851.1	1712824	1713309	1713267	Tc02v2_g002440	T	0.0181818	XP_017970641.1	LOC18607285	AKAprrICS95CHR2	703843	2174093
NC_030851.1	2087868	2087972	2087910	Tc02v2_g003150	G	0.0181818	XP_017971845.1	LOC18607361	AKAprrICS95CHR2	703843	2174093
NC_030855.1	4407081	4407488	4407243	Tc06v2_g003600	A	0.0181818	XP_007023476.1	LOC18595464	AKAprrICS100CHR62	3494620	5000000
NC_030852.1	36288452	36288757	36288647	Tc03v2_g027240	C	0.0181818	XP_017972797.1	LOC18606960	AKAfolICS100CHR3	35179055	36293379
NC_030853.1	325617	325763	325700	Tc04v2_g000330	T	0.0185185	XP_007031390.2	LOC18600713	BROphy1CHR4	1	1000000
NC_030851.1	740325	740639	740385	Tc02v2_g001040	G	0.0185185	XP_007041139.2	LOC18607088	AKAprrICS95CHR2	703843	2174093
NC_030851.1	1793157	1795716	1795410	Tc02v2_g002630	A	0.0185185	XP_007041450.2	LOC18607302	AKAprrICS95CHR2	703843	2174093
NC_030857.1	2509991	2511212	2510914	Tc08v2_g004750	G	0.0185185	XP_007017971.2	LOC18591665	BROphy2CHR8	2391280	4552442
NC_030853.1	252977	253954	253433	Tc04v2_g000210	C	0.0188679	XP_007031366.1	LOC18600699	BROphy1CHR4	1	1000000
NC_030853.1	843348	843630	843375	Tc04v2_g001140	T	0.0188679	XP_017974136.1	LOC18600801	BROphy1CHR4	1	1000000
NC_030857.1	1517658	1517744	1517740	Tc08v2_g002850	T	0.0188679	XP_007017654.2	LOC18591462	AKAprrHCHR8	1022182	2251917
NC_030851.1	1712824	1713309	1713056	Tc02v2_g002440	T	0.0188679	XP_017970641.1	LOC18607285	AKAprrICS95CHR2	703843	2174093
NC_030851.1	8594632	8595215	8594636	Tc02v2_g013620	G	0.0188679	XP_017971232.1	LOC18608512	BARq2BPPcCHR2	8244114	9182779
NC_030857.1	1657305	1660721	1660455	Tc08v2_g003150	A	0.0192308	XP_007017699.2	LOC18591492	AKAprrHCHR8	1022182	2251917
NC_030857.1	2552408	2552776	2552734	Tc08v2_g004850	T	0.0192308	XP_007017989.1	LOC18591677	BROphy2CHR8	2391280	4552442
NC_030853.1	252977	253954	253018	Tc04v2_g000210	A	0.0196078	XP_007031366.1	LOC18600699	BROphy1CHR4	1	1000000
NC_030857.1	2429106	2429397	2429228	Tc08v2_g004570	A	0.0196078	XP_017981404.1	LOC18591648	BROphy2CHR8	2391280	4552442
NC_030852.1	35506229	35506720	35506691	Tc03v2_g025820	C	0.0196078	XP_007040677.1	LOC18606807	AKAfolICS100CHR3	35179055	36293379
NC_030853.1	434022	434480	434400	Tc04v2_g000540	G	0.02	XP_007031422.2	LOC18600735	BROphy1CHR4	1	1000000
NC_030851.1	913502	913561	913536	Tc02v2_g001370	A	0.02	XP_017970820.1	LOC18607120	AKAprrICS95CHR2	703843	2174093
NC_030853.1	599881	600323	600010	Tc04v2_g000820	G	0.0211268	XP_017975916.1	LOC18600761	BROphy1CHR4	1	1000000
NC_030857.1	2160787	2161755	2161138	Tc08v2_g004040	T	0.0217391	XP_007017867.2	LOC18591592	AKAprrHCHR8	1022182	2251917
NC_030853.1	927838	929073	927905	Tc04v2_g001280	T	0.0223881	XP_017975736.1	LOC18600813	BROphy1CHR4	1	1000000
NC_030851.1	1763200	1763442	1763320	Tc02v2_g002560	A	0.0223881	XP_007041440.1	LOC18607297	AKAprrICS95CHR2	703843	2174093
NC_030857.1	1063115	1063312	1063246	Tc08v2_g001930	G	0.0227273	XP_007017500.2	LOC18591361	AKAprrHCHR8	1022182	2251917
NC_030857.1	2150885	2151218	2151016	Tc08v2_g004020	A	0.0227273	XP_007017861.2	LOC18591589	AKAprrHCHR8	1022182	2251917
NC_030851.1	8826792	8827028	8826966	Tc02v2_g013840	A	0.0227273	XP_017971250.1	LOC18608537	BARq2BPPcCHR2	8244114	9182779
NC_030851.1	750477	750830	750572	Tc02v2_g001060	A	0.0234375	XP_017970678.1	LOC18607090	AKAprrICS95CHR2	703843	2174093
NC_030851.1	8361240	8361617	8361458	Tc02v2_g013280	G	0.0234375	XP_007043260.2	LOC18608478	BARq2BPPcCHR2	8244114	9182779
NC_030851.1	8826792	8827028	8826973	Tc02v2_g013840	A	0.0234375	XP_017971250.1	LOC18608537	BARq2BPPcCHR2	8244114	9182779
NC_030852.1	35674670	35675632	35675195	Tc03v2_g026080	A	0.0234375	XP_017973240.1	LOC18606837	AKAfolICS100CHR3	35179055	36293379
NC_030859.1	20310529	20310601	20310547	Tc10v2_g012890	T	0.0238095	XP_017984837.1	LOC18587333	BROphy3CHR10	16000000	20882174
NC_030851.1	1606748	1606926	1606868	Tc02v2_g002150	A	0.0241935	XP_017970545.1	LOC18607254	AKAprrICS95CHR2	703843	2174093
NC_030852.1	35506229	35506720	35506572	Tc03v2_g025820	T	0.0241935	XP_007040677.1	LOC18606807	AKAfolICS100CHR3	35179055	36293379
NC_030851.1	8361240	8361617	8361402	Tc02v2_g013280	A	0.0245902	XP_007043260.2	LOC18608478	BARq2BPPcCHR2	8244114	9182779
NC_030851.1	1793157	1795716	1793238	Tc02v2_g002630	T	0.025	XP_007041450.2	LOC18607302	AKAprrICS95CHR2	703843	2174093
NC_030851.1	734937	735785	735042	Tc02v2_g001020	T	0.0254237	XP_017971108.1	LOC18607086	AKAprrICS95CHR2	703843	2174093
NC_030851.1	750477	750830	750737	Tc02v2_g001060	C	0.0254237	XP_017970678.1	LOC18607090	AKAprrICS95CHR2	703843	2174093
NC_030853.1	927838	929073	927889	Tc04v2_g001280	G	0.0254237	XP_017975736.1	LOC18600813	BROphy1CHR4	1	1000000
NC_030859.1	19073687	19073845	19073814	Tc10v2_g012110	G	0.0254237	XP_017984778.1	LOC18587219	BROphy3CHR10	16000000	20882174
NC_030855.1	461199	463739	463516	Tc06v2_g000390	G	0.0258621	XP_007022934.2	LOC18595077	BARq1BPPctCHR6	219626	689235
NC_030851.1	1712824	1713309	1713111	Tc02v2_g002440	A	0.0258621	XP_017970641.1	LOC18607285	AKAprrICS95CHR2	703843	2174093
NC_030857.1	1867136	1867695	1867442	Tc08v2_g003510	A	0.0258621	XP_007017768.1	LOC18591531	AKAprrHCHR8	1022182	2251917
NC_030859.1	19073687	19073845	19073733	Tc10v2_g012110	T	0.0258621	XP_017984778.1	LOC18587219	BROphy3CHR10	16000000	20882174
NC_030852.1	35790851	35791419	35790966	Tc03v2_g026250	C	0.0258621	XP_007040771.1	LOC18606857	AKAfolICS100CHR3	35179055	36293379
NC_030851.1	734937	735785	735778	Tc02v2_g001020	C	0.0263158	XP_017971108.1	LOC18607086	AKAprrICS95CHR2	703843	2174093
NC_030851.1	1656328	1656657	1656467	Tc02v2_g002290	C	0.0263158	XP_007041394.2	LOC18607268	AKAprrICS95CHR2	703843	2174093
NC_030857.1	2118860	2119123	2118903	Tc08v2_g003960	T	0.0263158	XP_017981820.1	LOC18591582	AKAprrHCHR8	1022182	2251917
NC_030851.1	8315799	8316024	8316009	Tc02v2_g013180	G	0.0263158	XP_007043251.1	LOC18608470	BARq2BPPcCHR2	8244114	9182779
NC_030853.1	599881	600323	600163	Tc04v2_g000820	G	0.0267857	XP_017975916.1	LOC18600761	BROphy1CHR4	1	1000000
NC_030857.1	2150885	2151218	2150903	Tc08v2_g004020	T	0.0267857	XP_007017861.2	LOC18591589	AKAprrHCHR8	1022182	2251917
NC_030852.1	35813294	35813607	35813503	Tc03v2_g026290	T	0.0267857	XP_017973834.1	LOC18606861	AKAfolICS100CHR3	35179055	36293379
NC_030855.1	3754644	3755468	3755405	Tc06v2_g003240	G	0.0272727	XP_007023408.1	LOC18595418	AKAprrICS100CHR62	3494620	5000000
NC_030852.1	35618087	35618850	35618255	Tc03v2_g025950	C	0.0272727	XP_017973698.1	LOC18606825	AKAfolICS100CHR3	35179055	36293379
NC_030852.1	35674670	35675632	35675208	Tc03v2_g026080	G	0.0272727	XP_017973240.1	LOC18606837	AKAfolICS100CHR3	35179055	36293379
NC_030857.1	1459852	1460127	1459952	Tc08v2_g002760	C	0.0277778	XP_007017633.1	LOC18591452	AKAprrHCHR8	1022182	2251917
NC_030851.1	1725846	1725970	1725864	Tc02v2_g002480	A	0.0277778	XP_007041427.2	LOC18607289	AKAprrICS95CHR2	703843	2174093
NC_030857.1	2045482	2045533	2045496	Tc08v2_g003860	G	0.0277778	XP_007017827.2	LOC18591571	AKAprrHCHR8	1022182	2251917
NC_030851.1	5226014	5226376	5226176	Tc02v2_g008430	A	0.0277778	XP_007042477.2	LOC18607965	qSINT2	5225868	5233436
NC_030853.1	465664	465930	465764	Tc04v2_g000590	G	0.0283019	XP_017975788.1	LOC18600739	BROphy1CHR4	1	1000000
NC_030855.1	3724818	3725045	3724972	Tc06v2_g003200	G	0.0288462	XP_007023401.2	LOC18595413	AKAprrICS100CHR62	3494620	5000000
NC_030853.1	927838	929073	928025	Tc04v2_g001280	T	0.0289855	XP_017975736.1	LOC18600813	BROphy1CHR4	1	1000000
NC_030851.1	750477	750830	750712	Tc02v2_g001060	T	0.0294118	XP_017970678.1	LOC18607090	AKAprrICS95CHR2	703843	2174093
NC_030857.1	1519268	1520125	1519633	Tc08v2_g002860	G	0.0294118	XP_007017655.1	LOC18591463	AKAprrHCHR8	1022182	2251917
NC_030855.1	3754644	3755468	3755021	Tc06v2_g003240	C	0.0294118	XP_007023408.1	LOC18595418	AKAprrICS100CHR62	3494620	5000000
NC_030851.1	1793157	1795716	1795347	Tc02v2_g002630	G	0.030303	XP_007041450.2	LOC18607302	AKAprrICS95CHR2	703843	2174093
NC_030857.1	2160787	2161755	2161079	Tc08v2_g004040	T	0.03125	XP_007017867.2	LOC18591592	AKAprrHCHR8	1022182	2251917
NC_030857.1	2509991	2511212	2510762	Tc08v2_g004750	T	0.0322581	XP_007017971.2	LOC18591665	BROphy2CHR8	2391280	4552442
NC_030851.1	1716175	1716663	1716504	Tc02v2_g002450	T	0.0327869	XP_017970203.1	LOC108660581	AKAprrICS95CHR2	703843	2174093
NC_030859.1	18726244	18726444	18726351	Tc10v2_g011790	T	0.0327869	XP_007010928.1	LOC18587171	BROphy3CHR10	16000000	20882174
NC_030853.1	325617	325763	325706	Tc04v2_g000330	T	0.0333333	XP_007031390.2	LOC18600713	BROphy1CHR4	1	1000000
NC_030853.1	326872	326963	326875	Tc04v2_g000330	C	0.0333333	XP_017975830.1	LOC18600713	BROphy1CHR4	1	1000000
NC_030851.1	716193	717944	716547	Tc02v2_g001010	G	0.0333333	XP_017971109.1	LOC18607085	AKAprrICS95CHR2	703843	2174093
NC_030857.1	2509991	2511212	2510286	Tc08v2_g004750	G	0.0333333	XP_007017971.2	LOC18591665	BROphy2CHR8	2391280	4552442
NC_030851.1	8660013	8660331	8660169	Tc02v2_g013680	G	0.0333333	XP_017971233.1	LOC18608519	BARq2BPPcCHR2	8244114	9182779
NC_030852.1	35427855	35428121	35428012	Tc03v2_g025620	C	0.0333333	XP_007040642.2	LOC18606786	AKAfolICS100CHR3	35179055	36293379
NC_030857.1	1563948	1564508	1564234	Tc08v2_g002970	G	0.0338983	XP_007017672.2	LOC18591475	AKAprrHCHR8	1022182	2251917
NC_030859.1	16638491	16638861	16638646	Tc10v2_g010420	G	0.0338983	XP_017985087.1	LOC18586967	BROphy3CHR10	16000000	20882174
NC_030859.1	17695937	17696372	17696363	Tc10v2_g011010	A	0.0338983	XP_007010774.1	LOC18587059	BROphy3CHR10	16000000	20882174
NC_030852.1	35813294	35813607	35813355	Tc03v2_g026290	A	0.0338983	XP_017973834.1	LOC18606861	AKAfolICS100CHR3	35179055	36293379
NC_030851.1	1656328	1656657	1656428	Tc02v2_g002290	C	0.0344828	XP_007041394.2	LOC18607268	AKAprrICS95CHR2	703843	2174093
NC_030857.1	1895466	1895682	1895650	Tc08v2_g003540	G	0.0344828	XP_007017776.1	LOC18591535	AKAprrHCHR8	1022182	2251917
NC_030857.1	2900256	2900837	2900595	Tc08v2_g005490	A	0.0344828	XP_007018117.1	LOC18591745	BROphy2CHR8	2391280	4552442
NC_030851.1	734937	735785	735691	Tc02v2_g001020	C	0.0350877	XP_017971108.1	LOC18607086	AKAprrICS95CHR2	703843	2174093
NC_030857.1	2509991	2511212	2510703	Tc08v2_g004750	G	0.0350877	XP_007017971.2	LOC18591665	BROphy2CHR8	2391280	4552442
NC_030857.1	2900256	2900837	2900451	Tc08v2_g005490	G	0.0350877	XP_007018117.1	LOC18591745	BROphy2CHR8	2391280	4552442
NC_030855.1	461199	463739	463694	Tc06v2_g000390	C	0.0357143	XP_007022934.2	LOC18595077	BARq1BPPctCHR6	219626	689235
NC_030851.1	1781249	1781476	1781361	Tc02v2_g002600	A	0.0357143	XP_017972092.1	LOC18607299	AKAprrICS95CHR2	703843	2174093
NC_030857.1	1867136	1867695	1867193	Tc08v2_g003510	A	0.0357143	XP_007017768.1	LOC18591531	AKAprrHCHR8	1022182	2251917
NC_030857.1	1867136	1867695	1867589	Tc08v2_g003510	T	0.0357143	XP_007017768.1	LOC18591531	AKAprrHCHR8	1022182	2251917
NC_030851.1	8594632	8595215	8594985	Tc02v2_g013620	C	0.0357143	XP_017971232.1	LOC18608512	BARq2BPPcCHR2	8244114	9182779
NC_030852.1	35813294	35813607	35813324	Tc03v2_g026290	C	0.0357143	XP_017973834.1	LOC18606861	AKAfolICS100CHR3	35179055	36293379
NC_030853.1	252977	253954	253804	Tc04v2_g000210	C	0.0363636	XP_007031366.1	LOC18600699	BROphy1CHR4	1	1000000
NC_030853.1	986328	986429	986386	Tc04v2_g001370	C	0.0363636	XP_007031564.2	LOC18600823	BROphy1CHR4	1	1000000
NC_030851.1	1793157	1795716	1795485	Tc02v2_g002630	A	0.0363636	XP_007041450.2	LOC18607302	AKAprrICS95CHR2	703843	2174093
NC_030857.1	2509991	2511212	2510929	Tc08v2_g004750	T	0.0363636	XP_007017971.2	LOC18591665	BROphy2CHR8	2391280	4552442
NC_030851.1	716193	717944	716766	Tc02v2_g001010	A	0.037037	XP_017971109.1	LOC18607085	AKAprrICS95CHR2	703843	2174093
NC_030851.1	1020084	1020326	1020099	Tc02v2_g001560	G	0.037037	XP_007041230.2	LOC18607147	AKAprrICS95CHR2	703843	2174093
NC_030857.1	2150885	2151218	2151144	Tc08v2_g004020	T	0.037037	XP_007017861.2	LOC18591589	AKAprrHCHR8	1022182	2251917
NC_030857.1	2885216	2885350	2885297	Tc08v2_g005450	A	0.037037	XP_007018110.2	LOC18591741	BROphy2CHR8	2391280	4552442
NC_030857.1	2900256	2900837	2900311	Tc08v2_g005490	A	0.037037	XP_007018117.1	LOC18591745	BROphy2CHR8	2391280	4552442
NC_030853.1	927838	929073	928916	Tc04v2_g001280	G	0.0373134	XP_017975736.1	LOC18600813	BROphy1CHR4	1	1000000
NC_030853.1	986328	986429	986385	Tc04v2_g001370	C	0.0377358	XP_007031564.2	LOC18600823	BROphy1CHR4	1	1000000
NC_030851.1	1793157	1795716	1793543	Tc02v2_g002630	A	0.0377358	XP_007041450.2	LOC18607302	AKAprrICS95CHR2	703843	2174093
NC_030851.1	1793157	1795716	1795544	Tc02v2_g002630	A	0.0377358	XP_007041450.2	LOC18607302	AKAprrICS95CHR2	703843	2174093
NC_030851.1	8440547	8440758	8440703	Tc02v2_g013420	G	0.0377358	XP_007043279.2	LOC18608493	BARq2BPPcCHR2	8244114	9182779
NC_030852.1	36236544	36238010	36237464	Tc03v2_g027090	A	0.0377358	XP_007040917.2	LOC18606945	AKAfolICS100CHR3	35179055	36293379
NC_030851.1	750477	750830	750571	Tc02v2_g001060	G	0.0384615	XP_017970678.1	LOC18607090	AKAprrICS95CHR2	703843	2174093
NC_030851.1	1793157	1795716	1793193	Tc02v2_g002630	A	0.0384615	XP_007041450.2	LOC18607302	AKAprrICS95CHR2	703843	2174093
NC_030851.1	1793157	1795716	1794278	Tc02v2_g002630	C	0.0384615	XP_007041450.2	LOC18607302	AKAprrICS95CHR2	703843	2174093
NC_030859.1	16016538	16018038	16017381	Tc10v2_g010150	T	0.0384615	XP_017984736.1	LOC18586933	BROphy3CHR10	16000000	20882174
NC_030851.1	1020084	1020326	1020267	Tc02v2_g001560	T	0.0392157	XP_007041230.2	LOC18607147	AKAprrICS95CHR2	703843	2174093
NC_030851.1	1650877	1650989	1650920	Tc02v2_g002280	G	0.0392157	XP_007041393.1	LOC18607267	AKAprrICS95CHR2	703843	2174093
NC_030857.1	2509991	2511212	2510039	Tc08v2_g004750	G	0.0392157	XP_007017971.2	LOC18591665	BROphy2CHR8	2391280	4552442
NC_030852.1	36287215	36287391	36287351	Tc03v2_g027230	C	0.0392157	XP_017972793.1	LOC18606959	AKAfolICS100CHR3	35179055	36293379
NC_030851.1	1978467	1978700	1978596	Tc02v2_g002920	A	0.04	XP_007041502.1	LOC18607337	AKAprrICS95CHR2	703843	2174093
NC_030857.1	1063115	1063312	1063197	Tc08v2_g001930	G	0.0403226	XP_007017500.2	LOC18591361	AKAprrHCHR8	1022182	2251917
NC_030851.1	1712824	1713309	1713039	Tc02v2_g002440	C	0.0403226	XP_017970641.1	LOC18607285	AKAprrICS95CHR2	703843	2174093
NC_030852.1	35803103	35804167	35803278	Tc03v2_g026280	T	0.0403226	XP_007040775.2	LOC18606860	AKAfolICS100CHR3	35179055	36293379
NC_030853.1	325617	325763	325744	Tc04v2_g000330	G	0.0409836	XP_007031390.2	LOC18600713	BROphy1CHR4	1	1000000
NC_030857.1	2160787	2161755	2161602	Tc08v2_g004040	T	0.0409836	XP_007017867.2	LOC18591592	AKAprrHCHR8	1022182	2251917
NC_030857.1	1457554	1458000	1457703	Tc08v2_g002750	T	0.0416667	XP_007017632.2	LOC18591451	AKAprrHCHR8	1022182	2251917
NC_030857.1	2160787	2161755	2161024	Tc08v2_g004040	C	0.0416667	XP_007017867.2	LOC18591592	AKAprrHCHR8	1022182	2251917
NC_030852.1	35618087	35618850	35618621	Tc03v2_g025950	A	0.0416667	XP_017973698.1	LOC18606825	AKAfolICS100CHR3	35179055	36293379
NC_030851.1	8826792	8827028	8826951	Tc02v2_g013840	A	0.0422535	XP_017971250.1	LOC18608537	BARq2BPPcCHR2	8244114	9182779
NC_030851.1	1710457	1710927	1710527	Tc02v2_g002430	A	0.0423729	XP_007041422.1	LOC18607284	AKAprrICS95CHR2	703843	2174093
NC_030851.1	1710457	1710927	1710674	Tc02v2_g002430	A	0.0423729	XP_007041422.1	LOC18607284	AKAprrICS95CHR2	703843	2174093
NC_030851.1	734937	735785	735130	Tc02v2_g001020	C	0.0431034	XP_017971108.1	LOC18607086	AKAprrICS95CHR2	703843	2174093
NC_030851.1	8436625	8436744	8436690	Tc02v2_g013400	C	0.0431034	XP_017971313.1	LOC18608490	BARq2BPPcCHR2	8244114	9182779
NC_030855.1	4213276	4213610	4213522	Tc06v2_g003440	T	0.0438596	XP_007023452.2	LOC18595444	AKAprrICS100CHR62	3494620	5000000
NC_030851.1	734937	735785	735107	Tc02v2_g001020	A	0.0446429	XP_017971108.1	LOC18607086	AKAprrICS95CHR2	703843	2174093
NC_030859.1	16016538	16018038	16016721	Tc10v2_g010150	C	0.0446429	XP_017984736.1	LOC18586933	BROphy3CHR10	16000000	20882174
NC_030859.1	18568547	18571498	18568731	Tc10v2_g011700	T	0.0446429	XP_007010914.2	LOC18587159	BROphy3CHR10	16000000	20882174
NC_030859.1	18568547	18571498	18568734	Tc10v2_g011700	C	0.0446429	XP_007010914.2	LOC18587159	BROphy3CHR10	16000000	20882174
NC_030859.1	17988757	17989806	17989348	Tc10v2_g011260	C	0.0447761	XP_007010821.2	LOC18587086	BROphy3CHR10	16000000	20882174
NC_030855.1	659642	659815	659786	Tc06v2_g000630	A	0.0454545	XP_007022979.2	LOC18595106	BARq1BPPctCHR6	219626	689235
NC_030859.1	17988757	17989806	17989355	Tc10v2_g011260	G	0.0454545	XP_007010821.2	LOC18587086	BROphy3CHR10	16000000	20882174
NC_030851.1	1793157	1795716	1795703	Tc02v2_g002630	C	0.0462963	XP_007041450.2	LOC18607302	AKAprrICS95CHR2	703843	2174093
NC_030859.1	20534647	20534936	20534731	Tc10v2_g013110	A	0.0462963	XP_017984163.1	LOC18587367	BROphy3CHR10	16000000	20882174
NC_030857.1	1479866	1480074	1479925	Tc08v2_g002810	G	0.046875	XP_017981297.1	LOC18591457	AKAprrHCHR8	1022182	2251917
NC_030851.1	8826792	8827028	8826994	Tc02v2_g013840	C	0.046875	XP_017971250.1	LOC18608537	BARq2BPPcCHR2	8244114	9182779
NC_030857.1	1563948	1564508	1563988	Tc08v2_g002970	C	0.047619	XP_007017672.2	LOC18591475	AKAprrHCHR8	1022182	2251917
NC_030857.1	1563948	1564508	1564084	Tc08v2_g002970	C	0.047619	XP_007017672.2	LOC18591475	AKAprrHCHR8	1022182	2251917
NC_030857.1	2160787	2161755	2161498	Tc08v2_g004040	A	0.0480769	XP_007017867.2	LOC18591592	AKAprrHCHR8	1022182	2251917
NC_030857.1	2509991	2511212	2511201	Tc08v2_g004750	C	0.0483871	XP_007017971.2	LOC18591665	BROphy2CHR8	2391280	4552442
NC_030851.1	8361240	8361617	8361372	Tc02v2_g013280	A	0.0483871	XP_007043260.2	LOC18608478	BARq2BPPcCHR2	8244114	9182779
NC_030852.1	36274892	36275017	36274930	Tc03v2_g027190	C	0.05	XP_007040930.1	LOC18606956	AKAfolICS100CHR3	35179055	36293379
NC_030857.1	2160787	2161755	2161418	Tc08v2_g004040	A	0.0507246	XP_007017867.2	LOC18591592	AKAprrHCHR8	1022182	2251917
NC_030853.1	843348	843630	843360	Tc04v2_g001140	T	0.0508475	XP_017974136.1	LOC18600801	BROphy1CHR4	1	1000000
NC_030857.1	1457554	1458000	1457799	Tc08v2_g002750	T	0.0508475	XP_007017632.2	LOC18591451	AKAprrHCHR8	1022182	2251917
NC_030851.1	1898802	1899149	1899013	Tc02v2_g002740	A	0.0508475	XP_007041472.1	LOC18607319	AKAprrICS95CHR2	703843	2174093
NC_030855.1	3822046	3823395	3822316	Tc06v2_g003300	G	0.0508475	XP_017977979.1	LOC18595426	AKAprrICS100CHR62	3494620	5000000
NC_030852.1	35618087	35618850	35618643	Tc03v2_g025950	C	0.0508475	XP_017973698.1	LOC18606825	AKAfolICS100CHR3	35179055	36293379
NC_030852.1	36236544	36238010	36236945	Tc03v2_g027090	T	0.0508475	XP_007040917.2	LOC18606945	AKAfolICS100CHR3	35179055	36293379
NC_030855.1	4213276	4213610	4213334	Tc06v2_g003440	C	0.0510204	XP_007023452.2	LOC18595444	AKAprrICS100CHR62	3494620	5000000
NC_030851.1	8436625	8436744	8436708	Tc02v2_g013400	T	0.0517241	XP_017971313.1	LOC18608490	BARq2BPPcCHR2	8244114	9182779
NC_030859.1	17988757	17989806	17989084	Tc10v2_g011260	T	0.0517241	XP_007010821.2	LOC18587086	BROphy3CHR10	16000000	20882174
NC_030851.1	1710457	1710927	1710585	Tc02v2_g002430	T	0.0526316	XP_007041422.1	LOC18607284	AKAprrICS95CHR2	703843	2174093
NC_030851.1	1793157	1795716	1794585	Tc02v2_g002630	T	0.0526316	XP_007041450.2	LOC18607302	AKAprrICS95CHR2	703843	2174093
NC_030851.1	1978467	1978700	1978552	Tc02v2_g002920	G	0.0526316	XP_007041502.1	LOC18607337	AKAprrICS95CHR2	703843	2174093
NC_030851.1	9182646	9182986	9182683	Tc02v2_g014030	C	0.0526316	XP_017970114.1	LOC18608563	BARq2BPPcCHR2	8244114	9182779
NC_030852.1	35790851	35791419	35790928	Tc03v2_g026250	C	0.0526316	XP_007040771.1	LOC18606857	AKAfolICS100CHR3	35179055	36293379
NC_030857.1	1563948	1564508	1564023	Tc08v2_g002970	T	0.0530303	XP_007017672.2	LOC18591475	AKAprrHCHR8	1022182	2251917
NC_030859.1	18921831	18921927	18921898	Tc10v2_g011960	C	0.0535714	XP_007010964.2	LOC18587204	BROphy3CHR10	16000000	20882174
NC_030851.1	1763200	1763442	1763330	Tc02v2_g002560	C	0.0538462	XP_007041440.1	LOC18607297	AKAprrICS95CHR2	703843	2174093
NC_030859.1	16638491	16638861	16638731	Tc10v2_g010420	G	0.0538462	XP_017985087.1	LOC18586967	BROphy3CHR10	16000000	20882174
NC_030857.1	2160787	2161755	2160848	Tc08v2_g004040	A	0.0540541	XP_007017867.2	LOC18591592	AKAprrHCHR8	1022182	2251917
NC_030857.1	2160787	2161755	2161618	Tc08v2_g004040	A	0.0546875	XP_007017867.2	LOC18591592	AKAprrHCHR8	1022182	2251917
NC_030857.1	1537572	1537751	1537706	Tc08v2_g002920	G	0.0555556	XP_007017662.2	LOC18591468	AKAprrHCHR8	1022182	2251917
NC_030851.1	1712824	1713309	1713195	Tc02v2_g002440	T	0.0555556	XP_017970641.1	LOC18607285	AKAprrICS95CHR2	703843	2174093
NC_030857.1	2514387	2515605	2514787	Tc08v2_g004760	T	0.0555556	XP_007017972.2	LOC18591666	BROphy2CHR8	2391280	4552442
NC_030855.1	3822046	3823395	3822200	Tc06v2_g003300	A	0.0555556	XP_017977979.1	LOC18595426	AKAprrICS100CHR62	3494620	5000000
NC_030851.1	9182646	9182986	9182670	Tc02v2_g014030	A	0.0555556	XP_017970114.1	LOC18608563	BARq2BPPcCHR2	8244114	9182779
NC_030859.1	18726244	18726444	18726324	Tc10v2_g011790	T	0.0555556	XP_007010928.1	LOC18587171	BROphy3CHR10	16000000	20882174
NC_030857.1	1433027	1433210	1433080	Tc08v2_g002680	A	0.0564516	XP_017980786.1	LOC18591444	AKAprrHCHR8	1022182	2251917
NC_030857.1	1571731	1571871	1571847	Tc08v2_g002980	A	0.0564516	XP_007017673.1	LOC18591476	AKAprrHCHR8	1022182	2251917
NC_030855.1	248408	249259	249147	Tc06v2_g000100	T	0.0571429	XP_007022863.2	LOC18595036	BARq1BPPctCHR6	219626	689235
NC_030857.1	1563948	1564508	1564366	Tc08v2_g002970	T	0.057377	XP_007017672.2	LOC18591475	AKAprrHCHR8	1022182	2251917
NC_030851.1	1793157	1795716	1793486	Tc02v2_g002630	A	0.057377	XP_007041450.2	LOC18607302	AKAprrICS95CHR2	703843	2174093
NC_030857.1	2429106	2429397	2429199	Tc08v2_g004570	T	0.057377	XP_017981404.1	LOC18591648	BROphy2CHR8	2391280	4552442
NC_030857.1	2437045	2437283	2437103	Tc08v2_g004590	A	0.0588235	XP_007017945.2	LOC18591650	BROphy2CHR8	2391280	4552442
NC_030851.1	716193	717944	716377	Tc02v2_g001010	A	0.059322	XP_017971109.1	LOC18607085	AKAprrICS95CHR2	703843	2174093
NC_030851.1	716193	717944	717187	Tc02v2_g001010	T	0.059322	XP_017971109.1	LOC18607085	AKAprrICS95CHR2	703843	2174093
NC_030851.1	8361240	8361617	8361382	Tc02v2_g013280	G	0.059322	XP_007043260.2	LOC18608478	BARq2BPPcCHR2	8244114	9182779
NC_030857.1	1519268	1520125	1519663	Tc08v2_g002860	G	0.0597015	XP_007017655.1	LOC18591463	AKAprrHCHR8	1022182	2251917
NC_030857.1	2850503	2850767	2850653	Tc08v2_g005380	T	0.0597015	XP_017981434.1	LOC18591733	BROphy2CHR8	2391280	4552442
NC_030853.1	507445	507630	507576	Tc04v2_g000640	T	0.0603448	XP_007031436.2	LOC18600744	BROphy1CHR4	1	1000000
NC_030857.1	1832117	1832569	1832503	Tc08v2_g003470	A	0.0603448	XP_007017754.2	LOC18591524	AKAprrHCHR8	1022182	2251917
NC_030857.1	1867136	1867695	1867157	Tc08v2_g003510	C	0.0603448	XP_007017768.1	LOC18591531	AKAprrHCHR8	1022182	2251917
NC_030851.1	8436625	8436744	8436683	Tc02v2_g013400	G	0.0603448	XP_017971313.1	LOC18608490	BARq2BPPcCHR2	8244114	9182779
NC_030851.1	9182646	9182986	9182686	Tc02v2_g014030	A	0.0603448	XP_017970114.1	LOC18608563	BARq2BPPcCHR2	8244114	9182779
NC_030851.1	1978467	1978700	1978515	Tc02v2_g002920	T	0.0612245	XP_007041502.1	LOC18607337	AKAprrICS95CHR2	703843	2174093
NC_030857.1	2459308	2459445	2459361	Tc08v2_g004630	T	0.0615385	XP_007017955.2	LOC18591654	BROphy2CHR8	2391280	4552442
[truncated: 408 more rows]
